# Supplementary material for: Radiocarbon Dated Trends and Central Mediterranean Prehistory
Source: Springer Nature journal article supplement (doi:10.1007/s10963-021-09158-4), 2021-09-01

9545 cal. BC

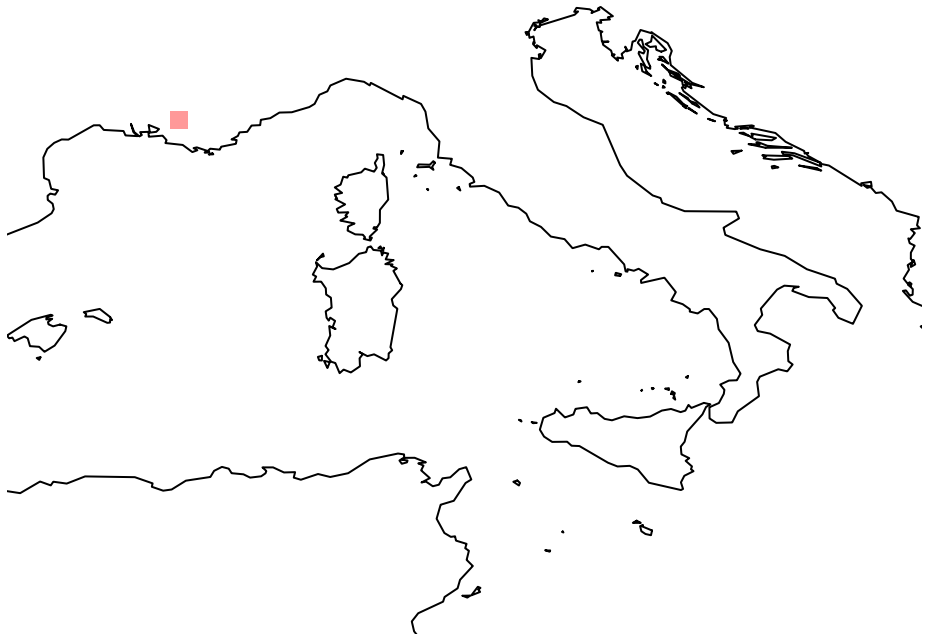

9540 cal. BC

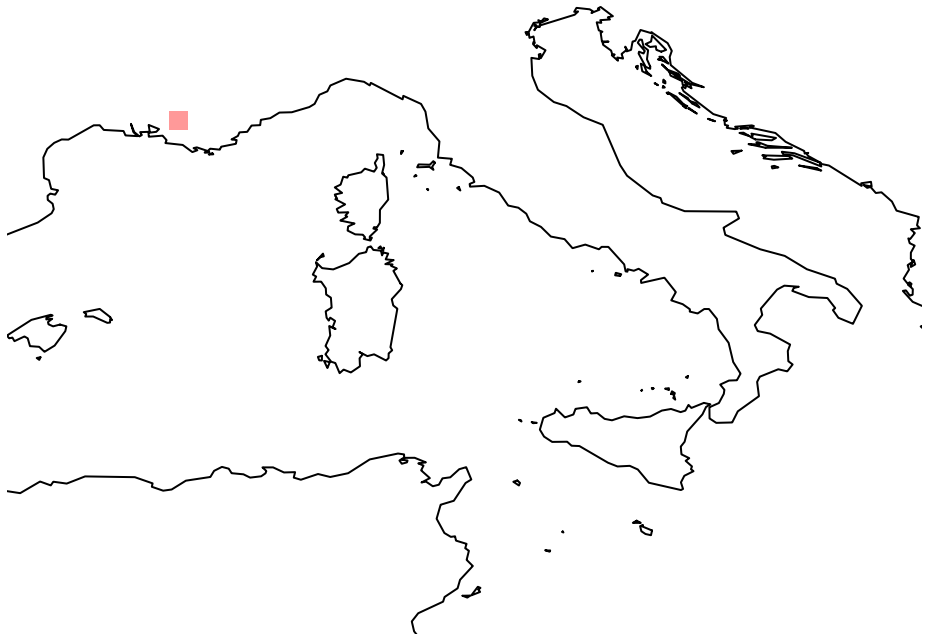

9535 cal. BC



9530 cal. BC

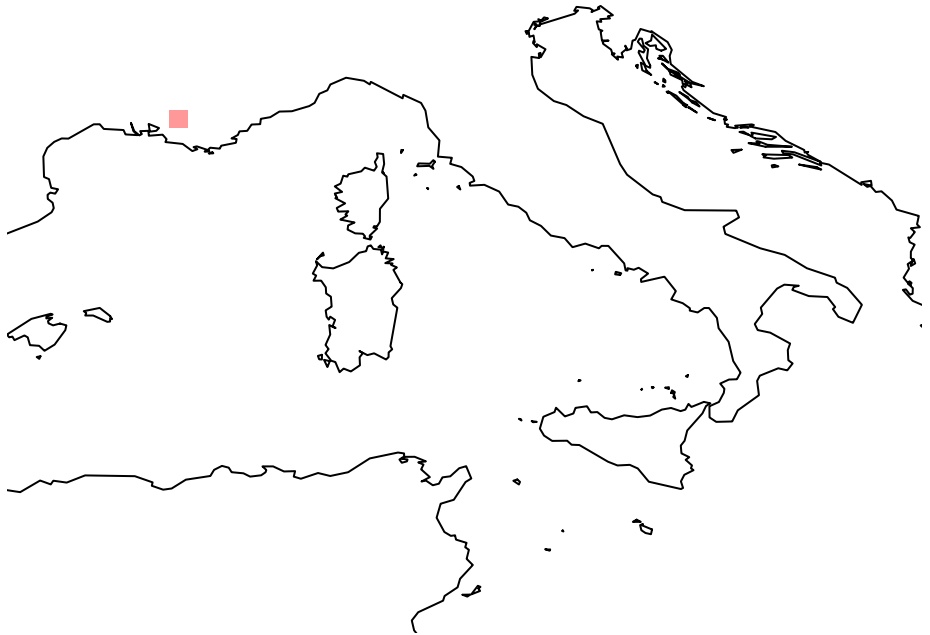



9525 cal. BC



9520 cal. BC

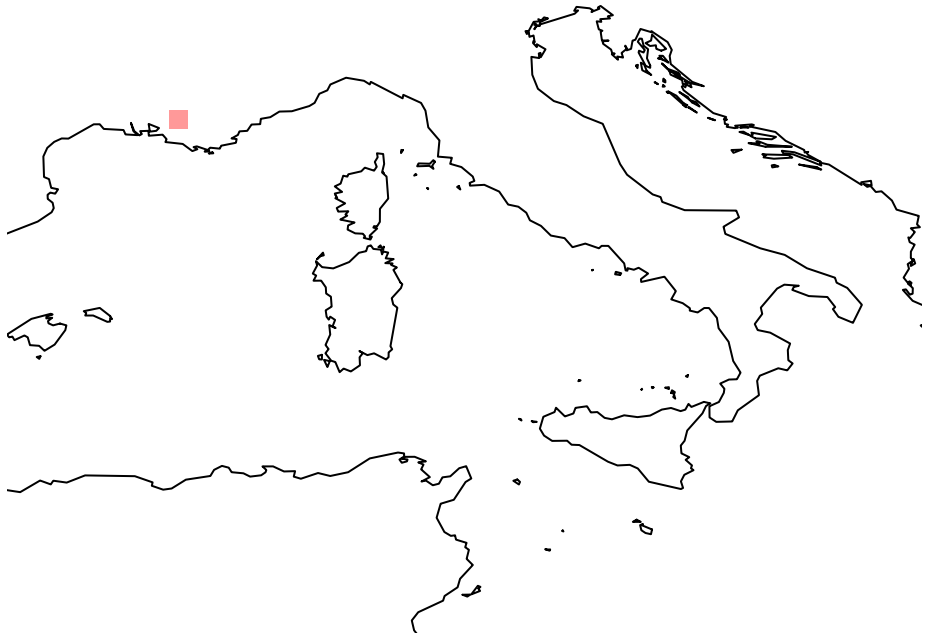

9515 cal. BC

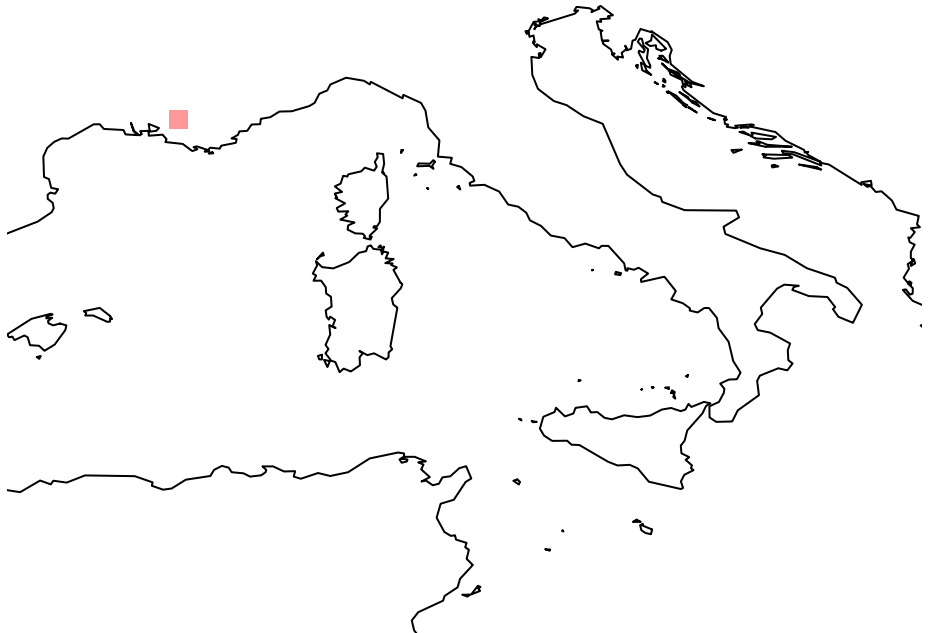

9510 cal. BC



9505 cal. BC



9500 cal. BC



9495 cal. BC



9490 cal. BC

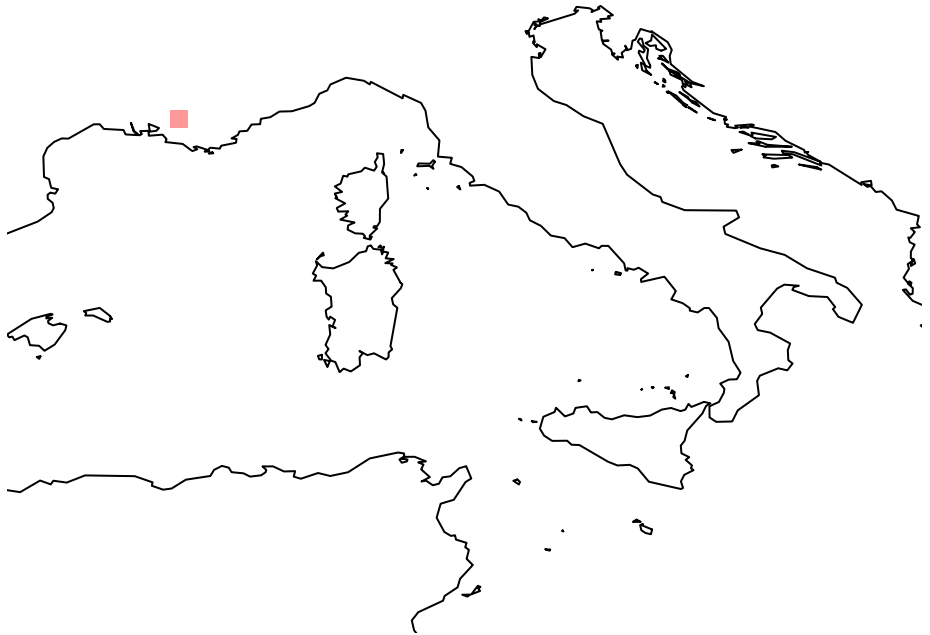



9485 cal. BC

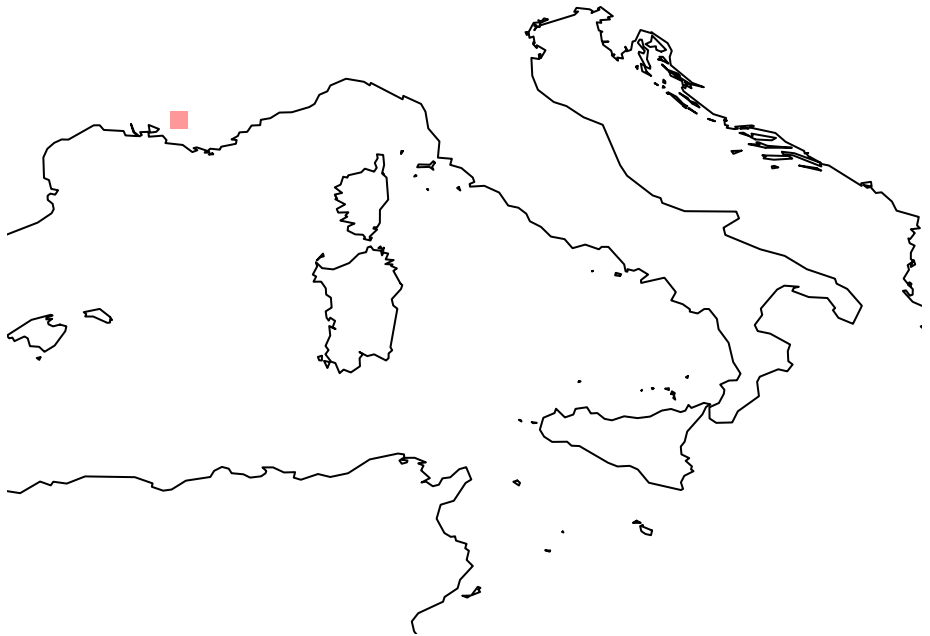

9480 cal. BC



9475 cal. BC

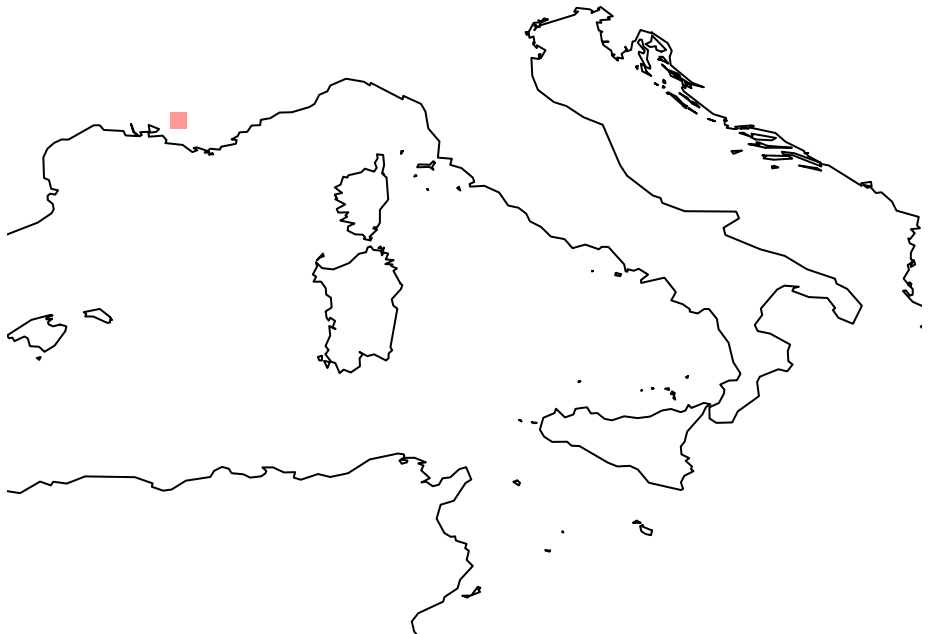

**9470 cal. BC**

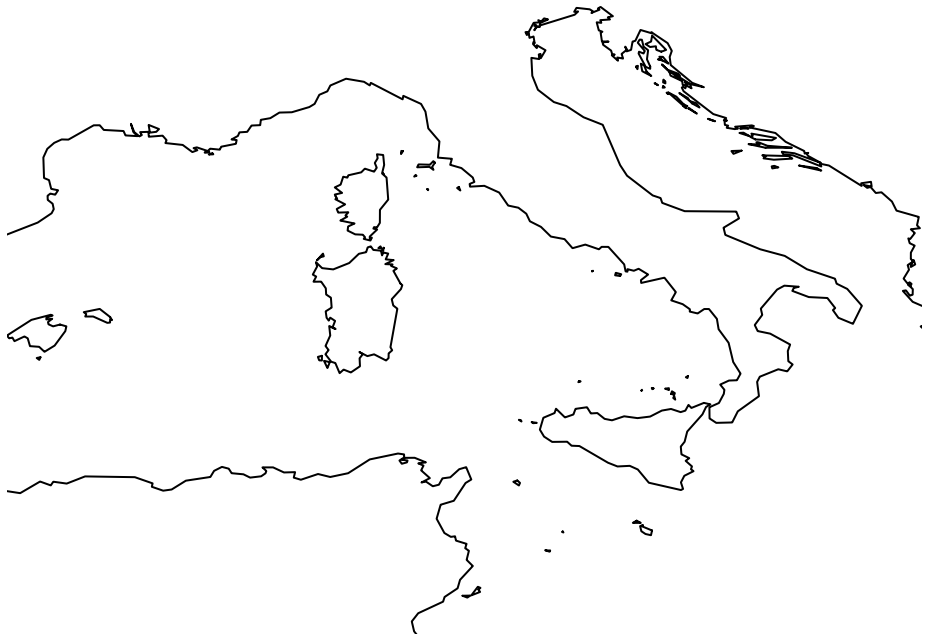

**9465 cal. BC**

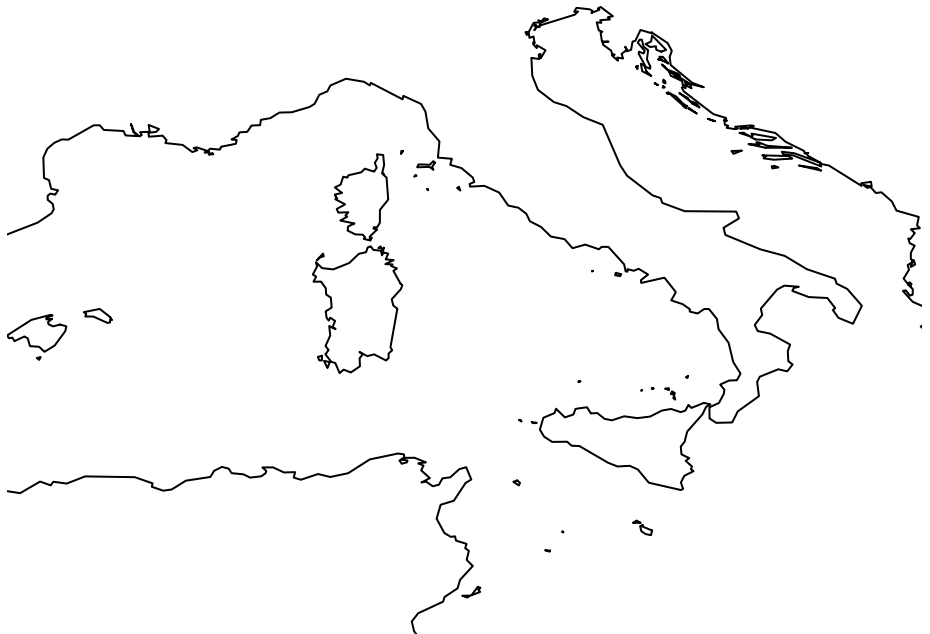

9460 cal. BC



9455 cal. BC



9450 cal. BC

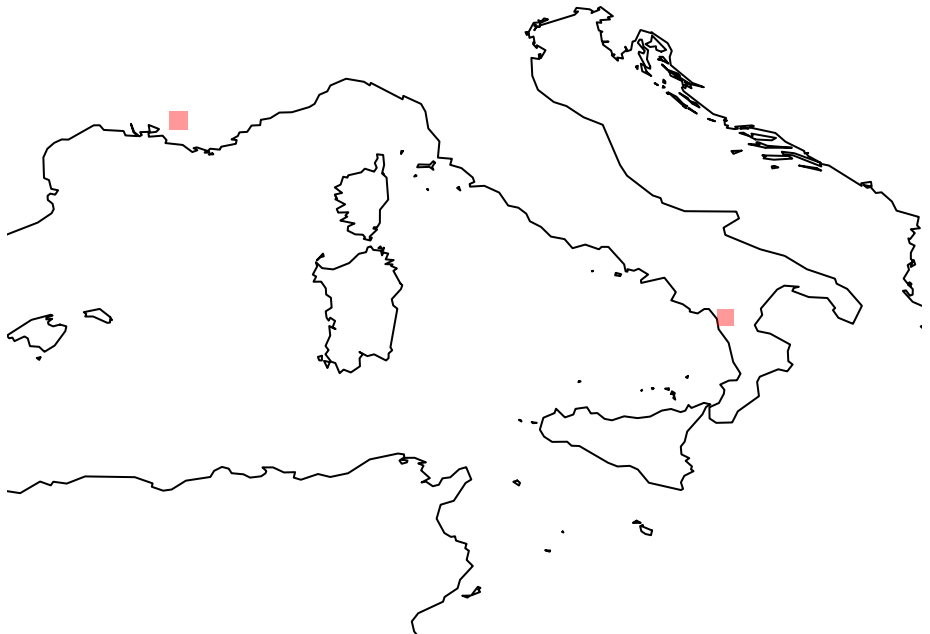



9445 cal. BC

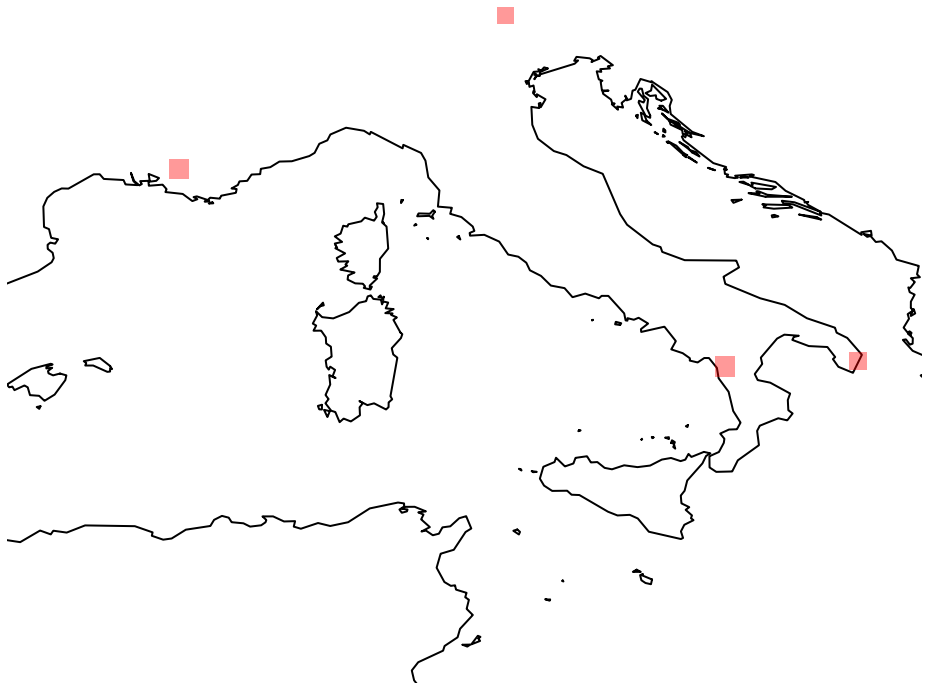

9440 cal. BC

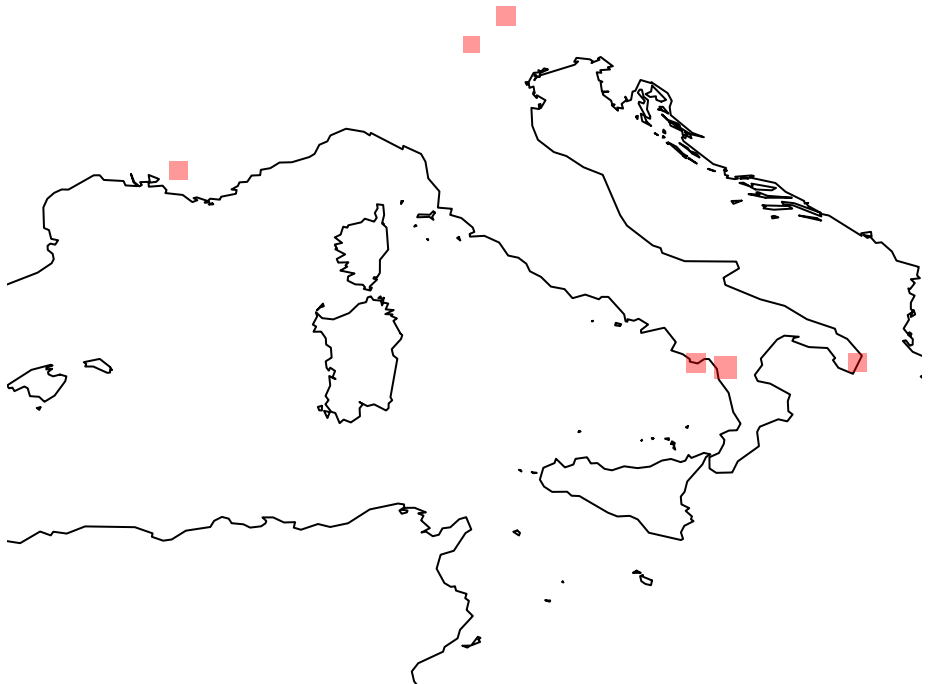

9435 cal. BC

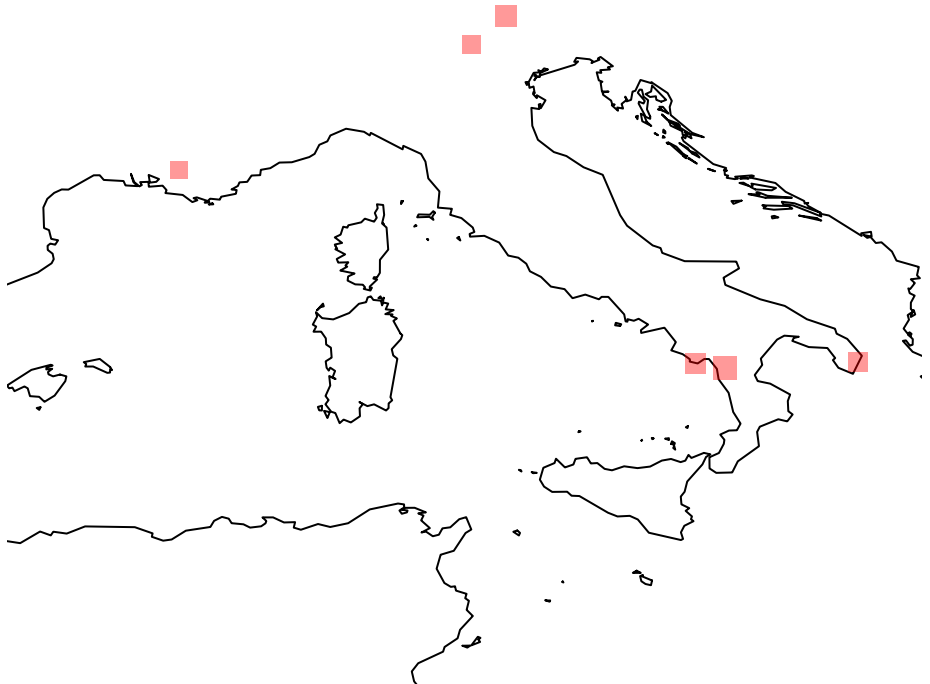

9430 cal. BC

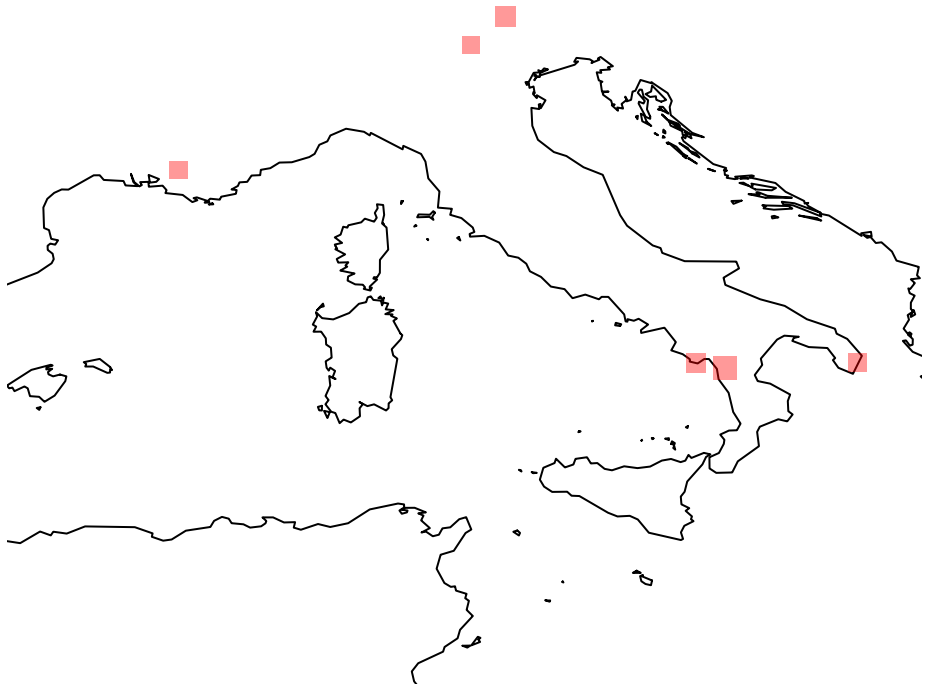

9425 cal. BC

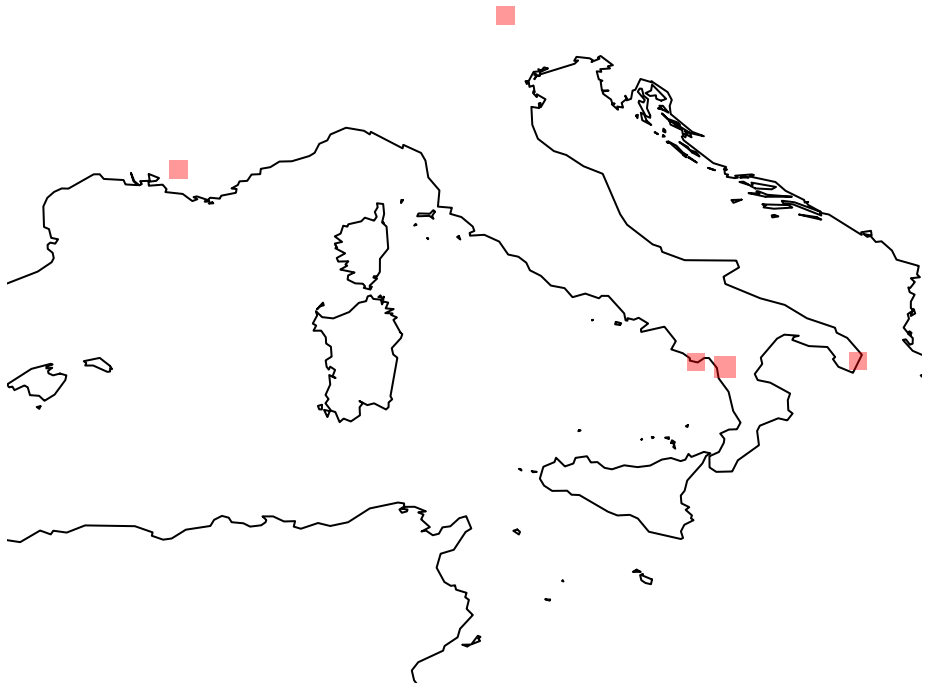

9420 cal. BC

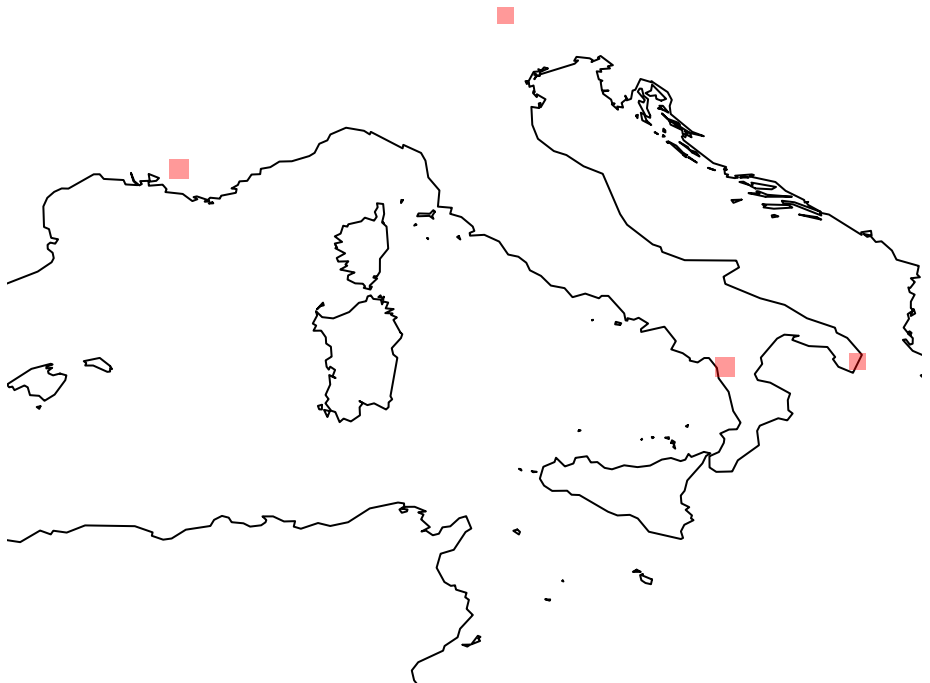

9415 cal. BC

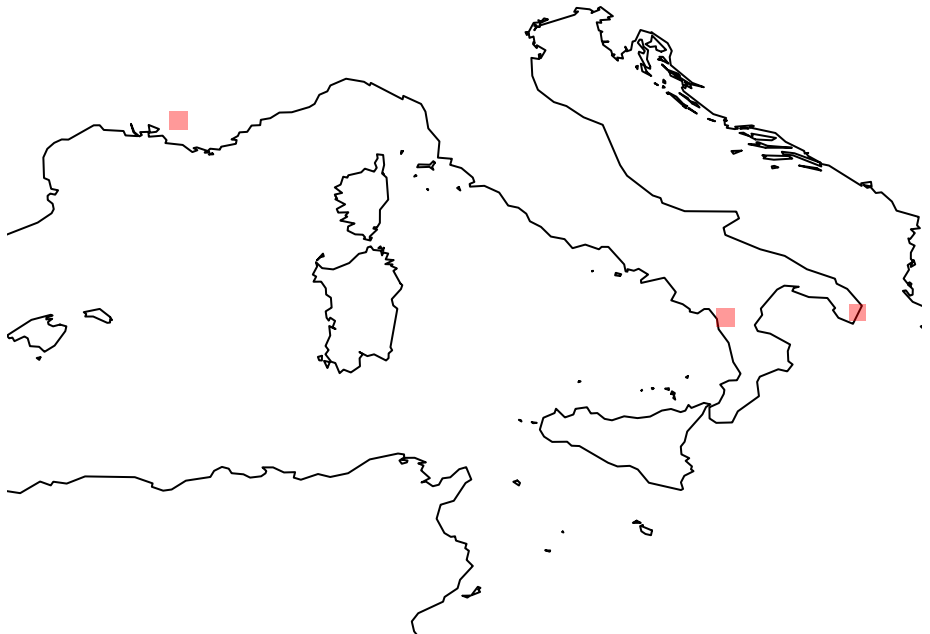

9410 cal. BC





9405 cal. BC

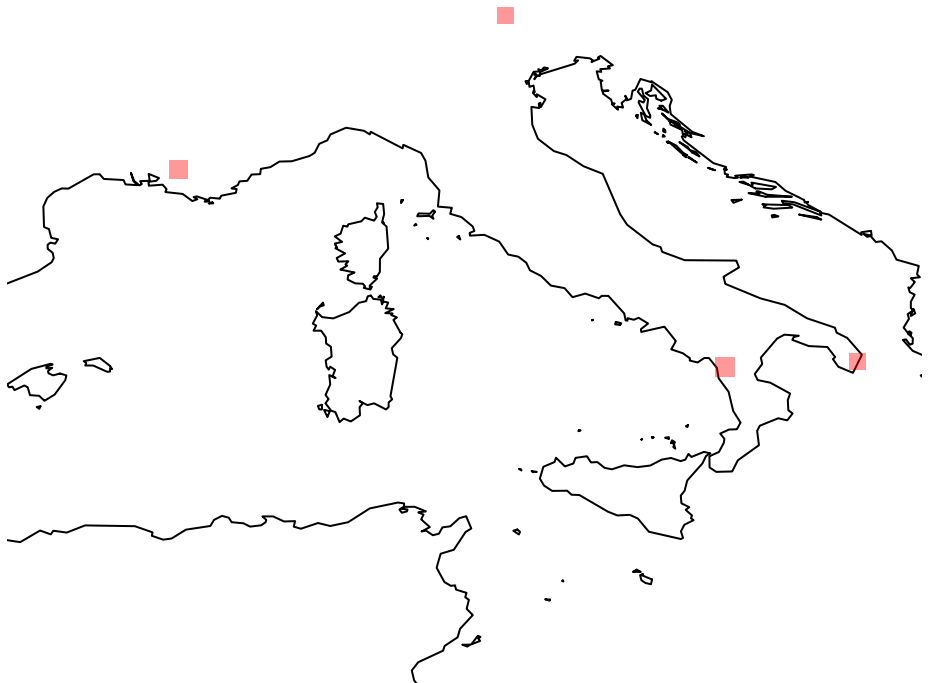

9400 cal. BC

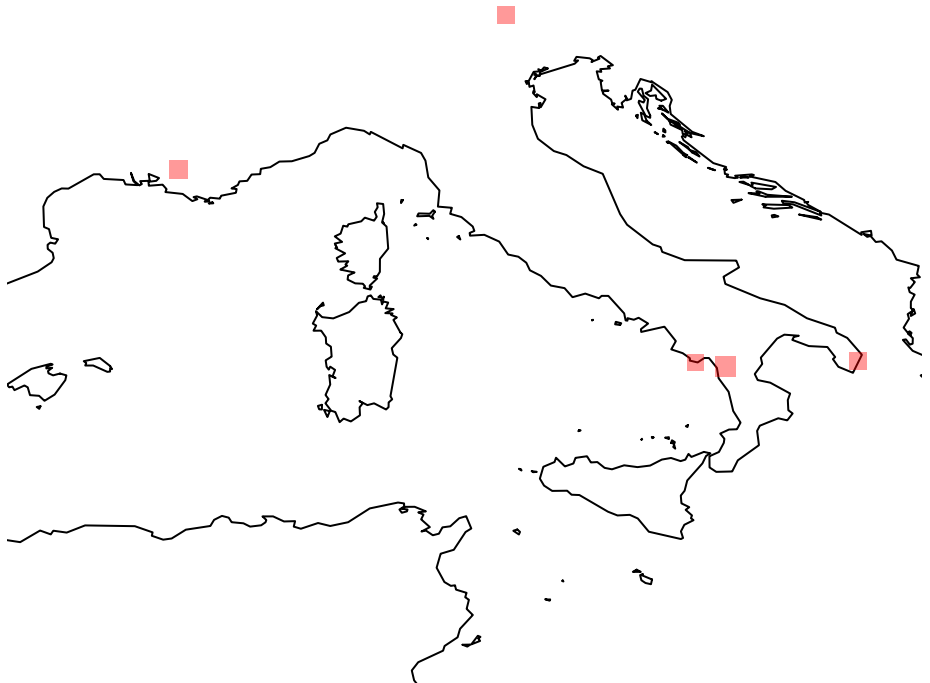

9395 cal. BC

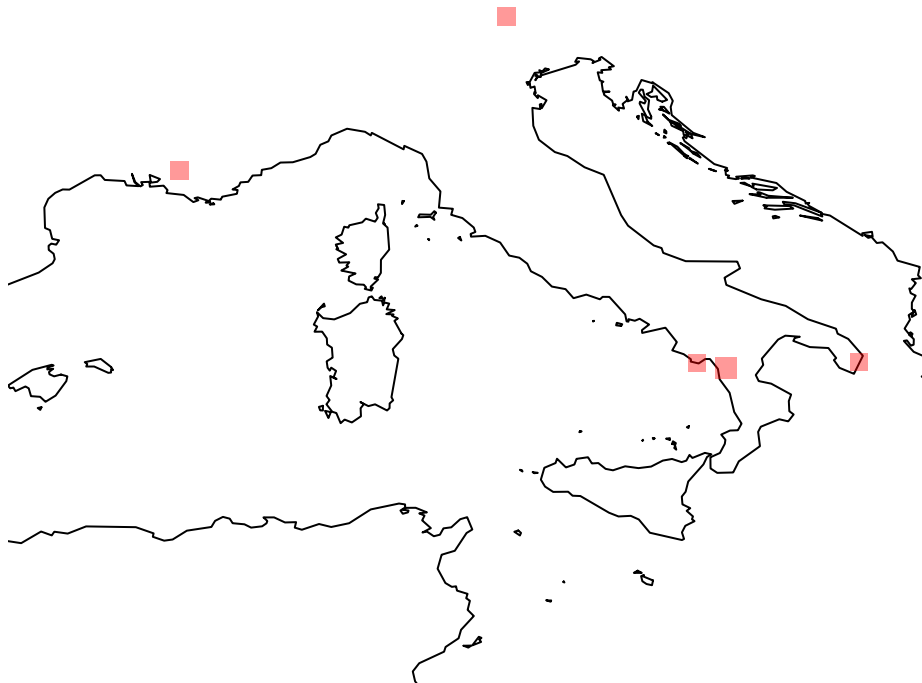

9390 cal. BC

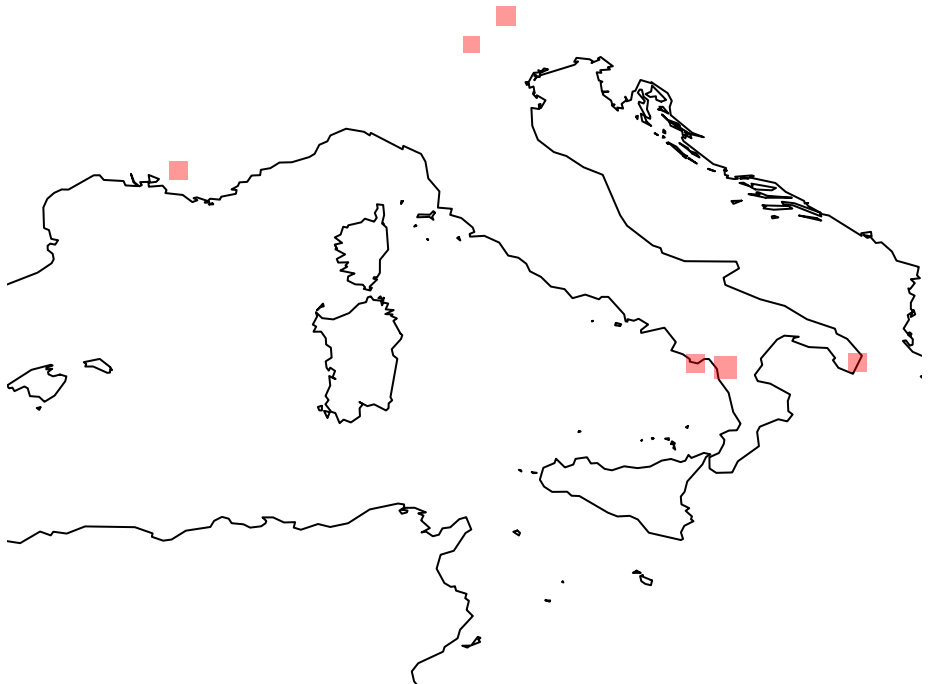

9385 cal. BC



9380 cal. BC



9375 cal. BC

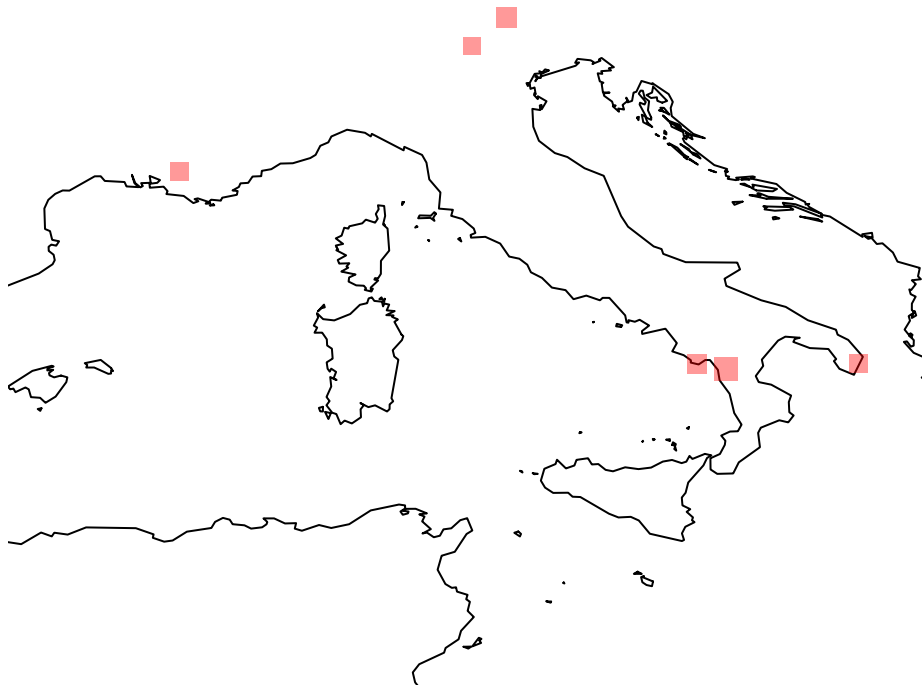

9370 cal. BC

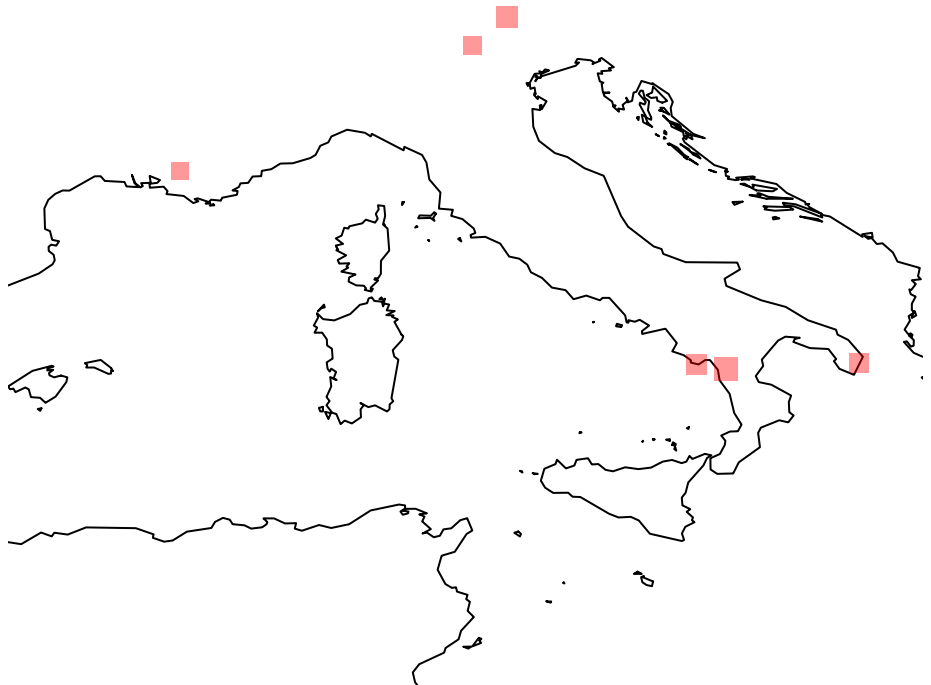



9365 cal. BC

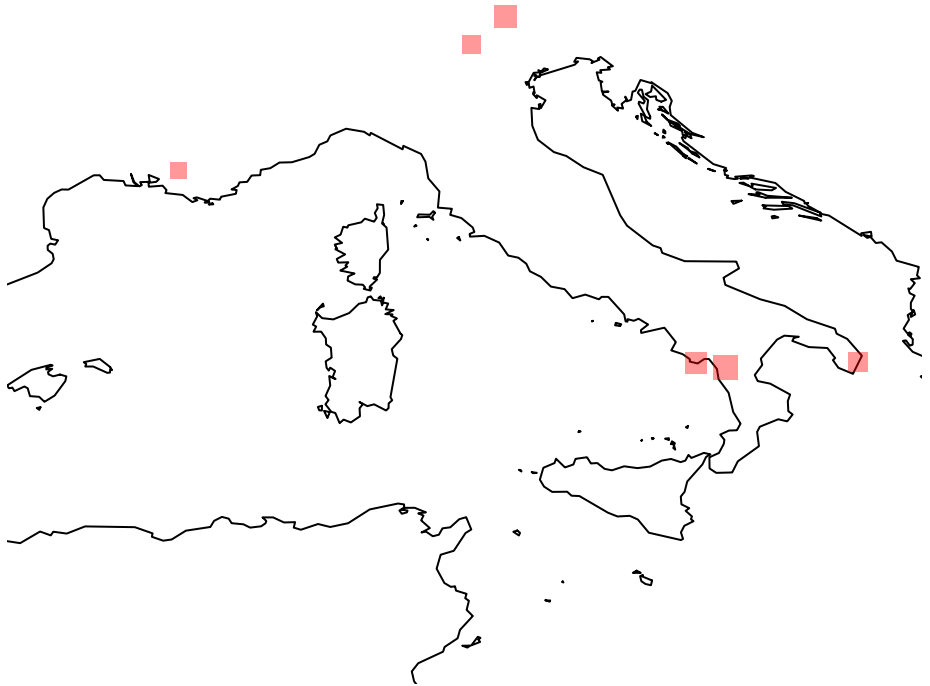

9360 cal. BC

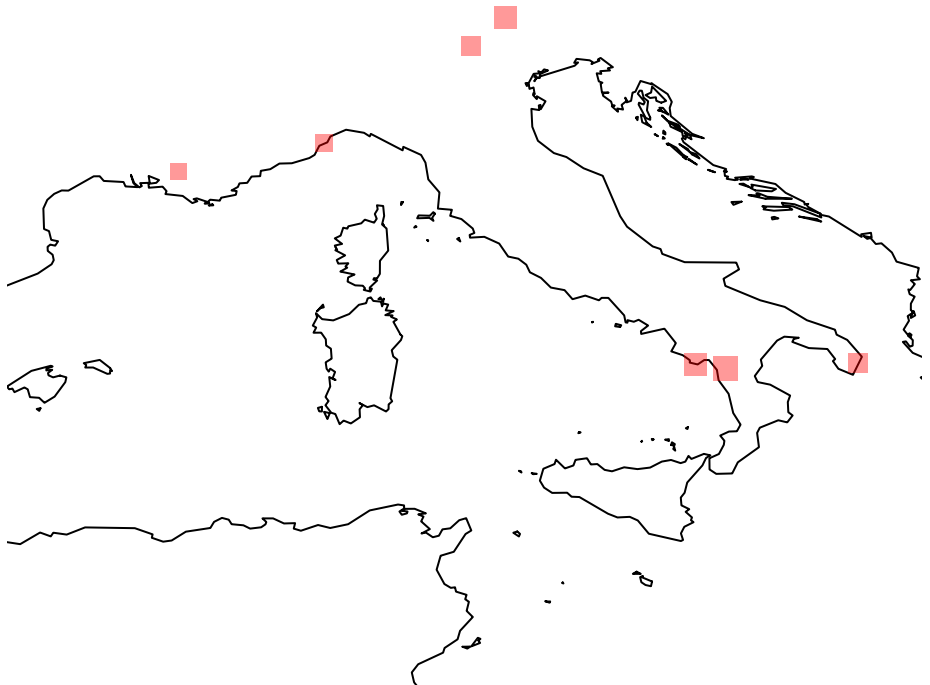

9355 cal. BC

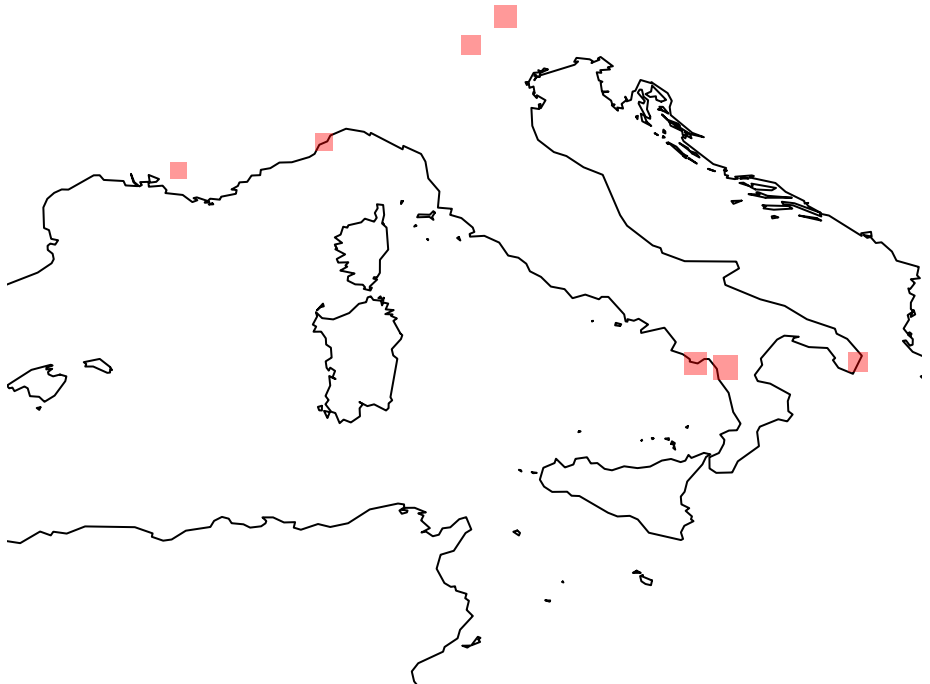

9350 cal. BC



9345 cal. BC

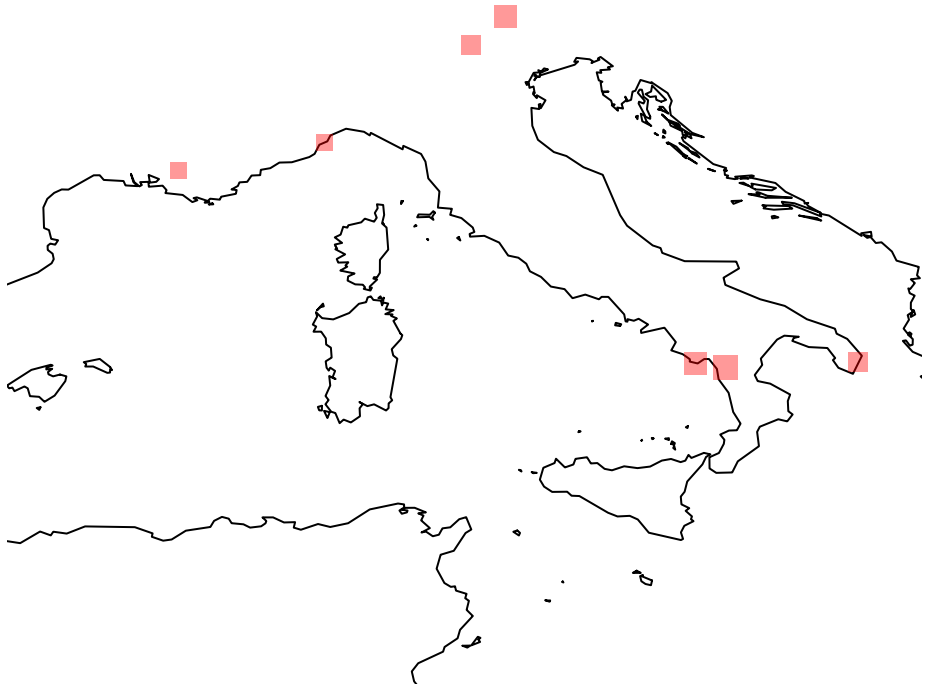

**9340 cal. BC**



9335 cal. BC



9330 cal. BC

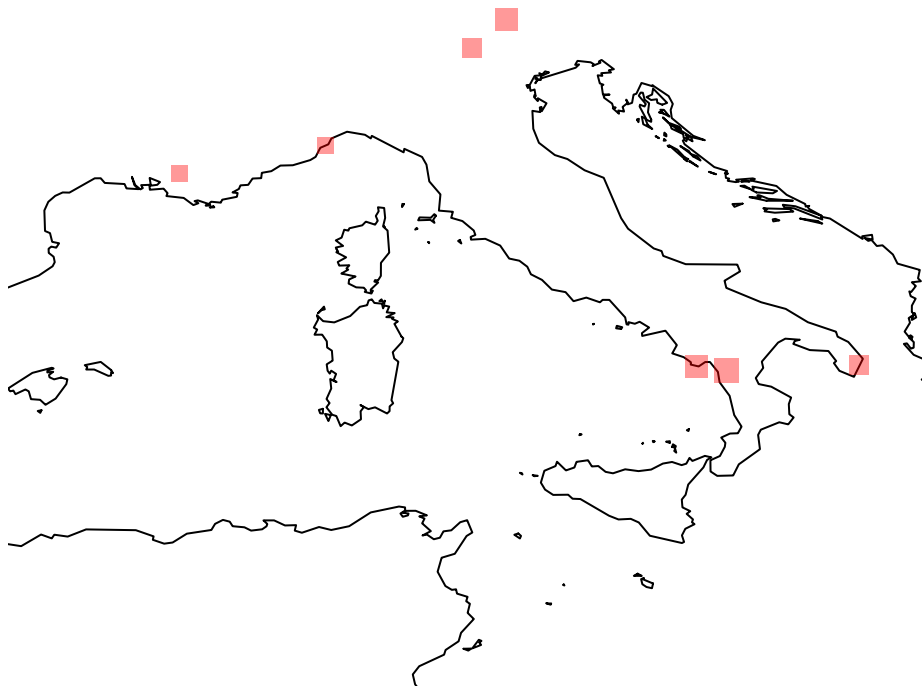



9325 cal. BC

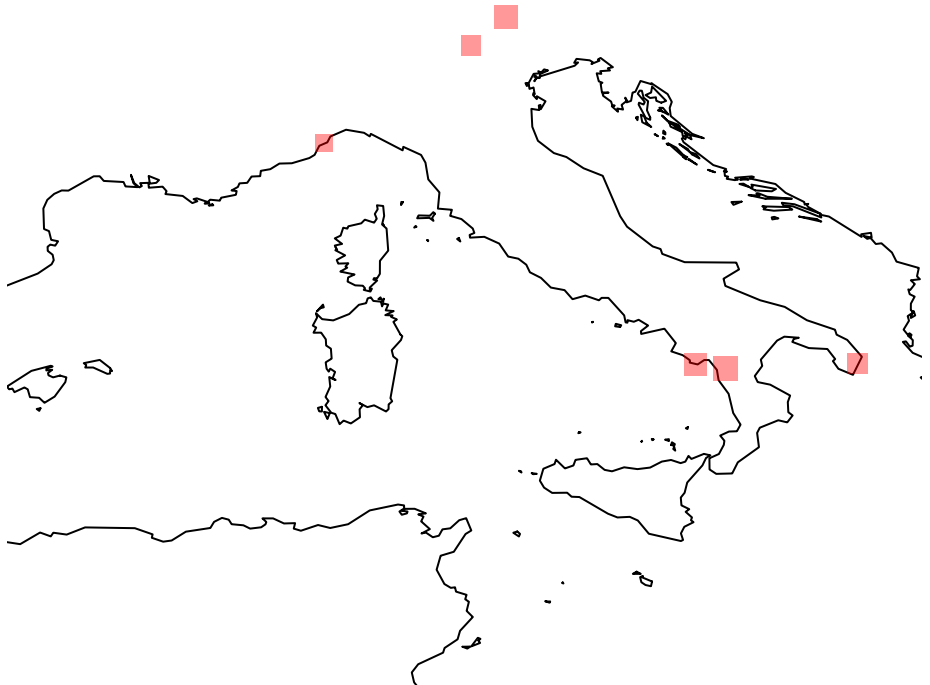

9320 cal. BC

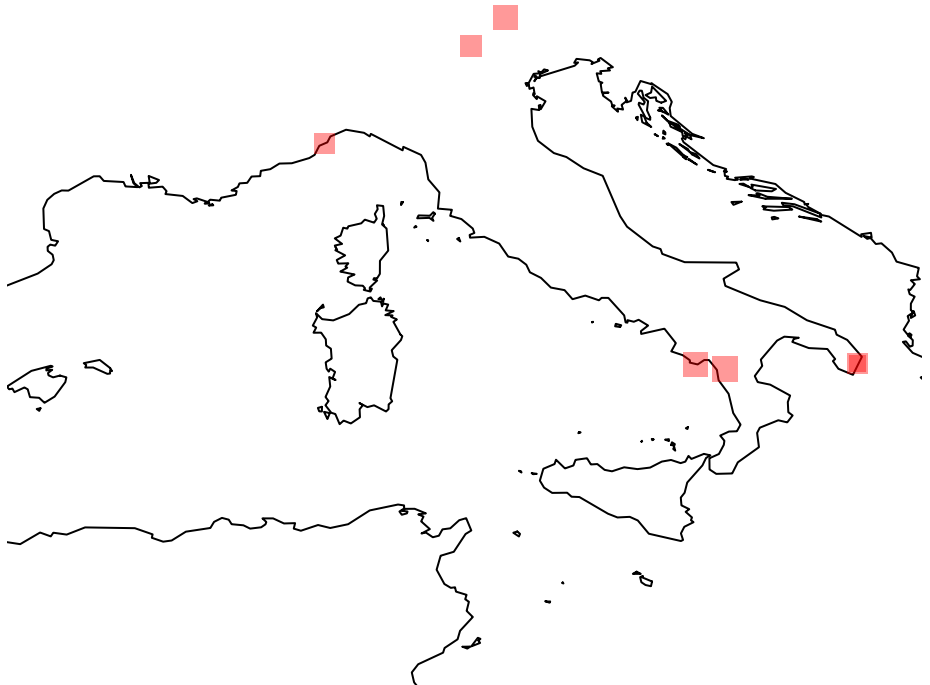

9315 cal. BC

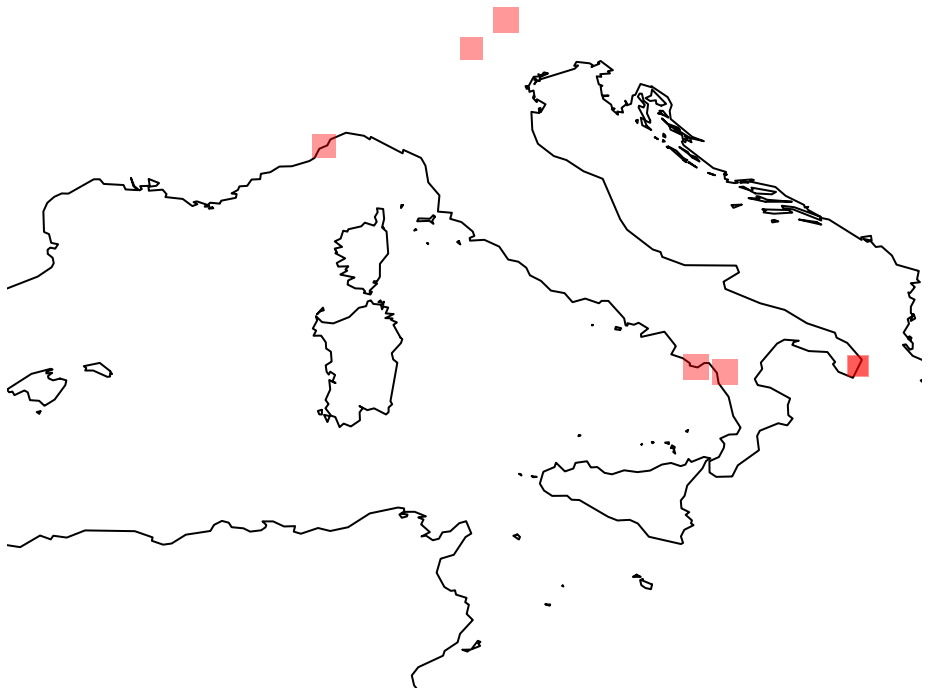

9310 cal. BC

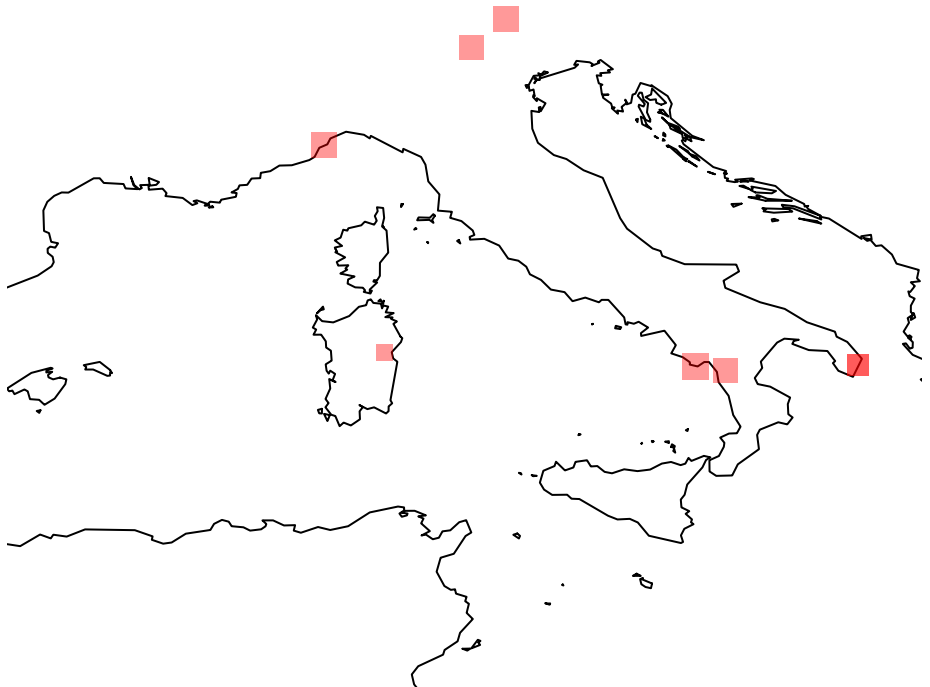

9305 cal. BC

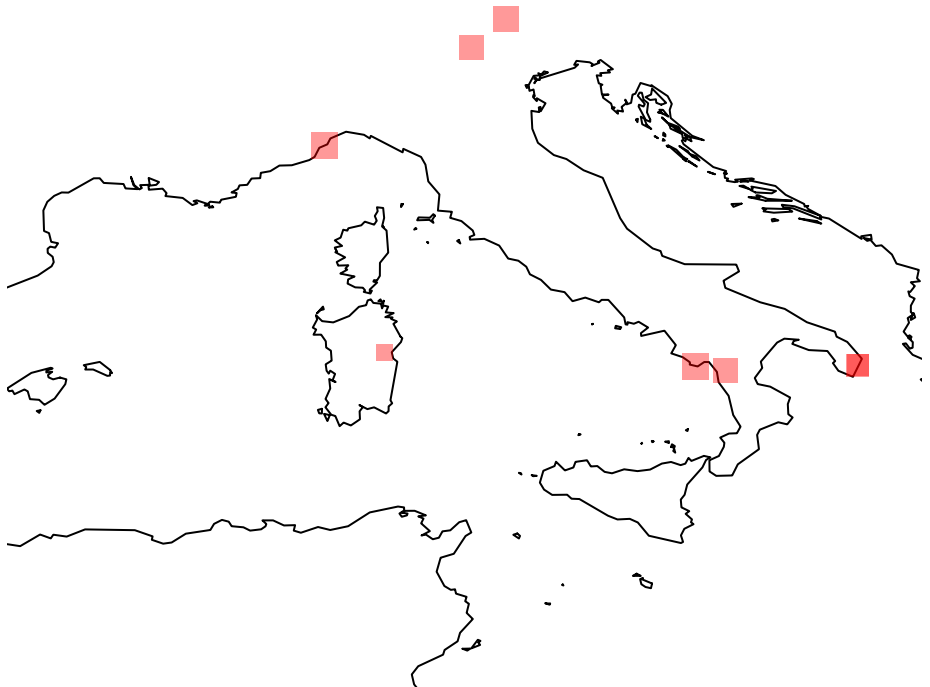

9300 cal. BC

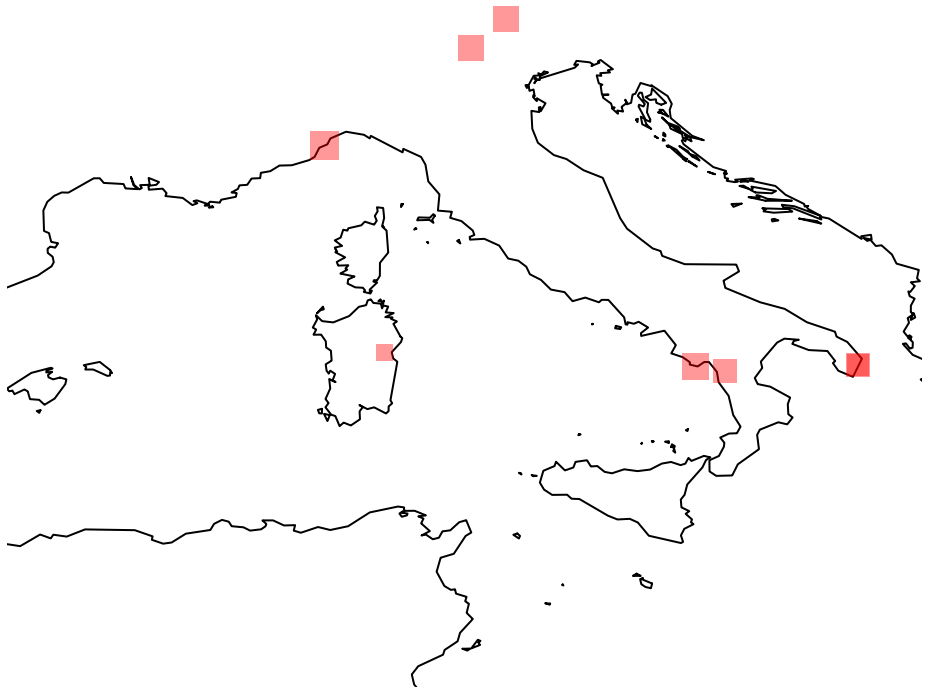

9295 cal. BC

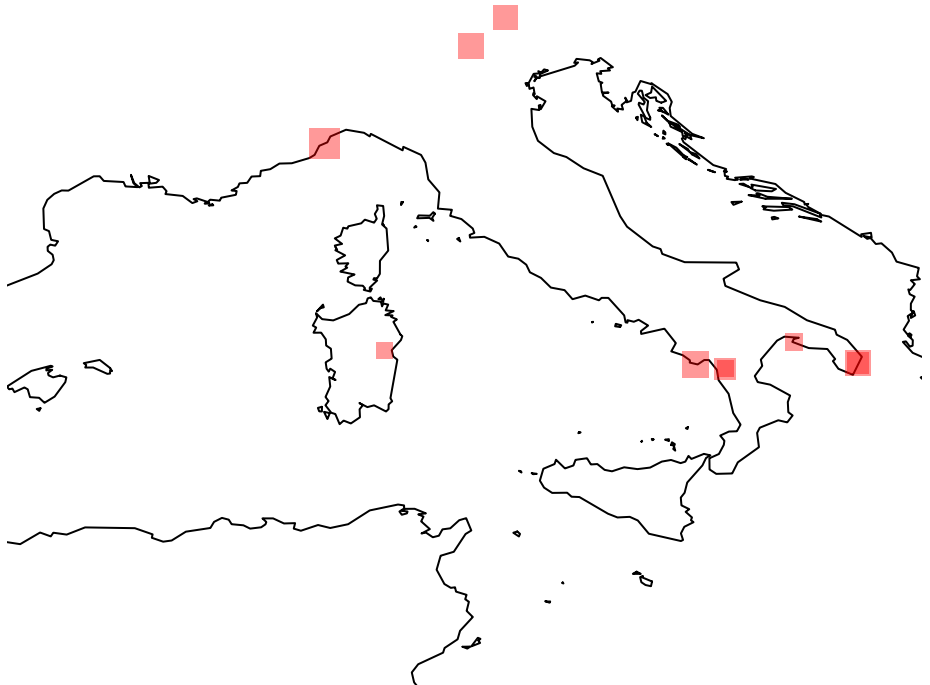

9290 cal. BC

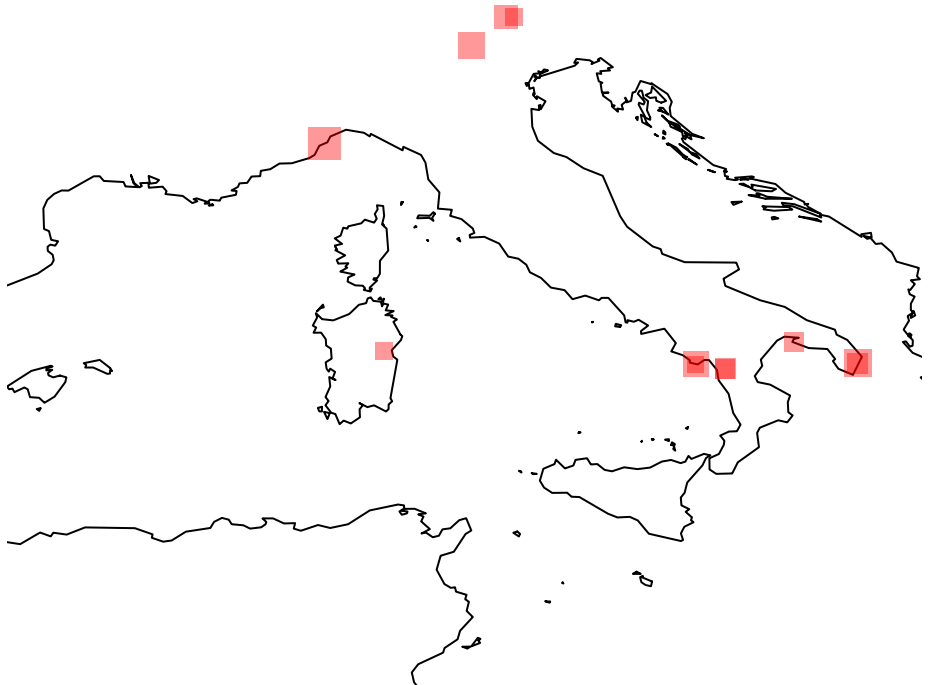



9285 cal. BC

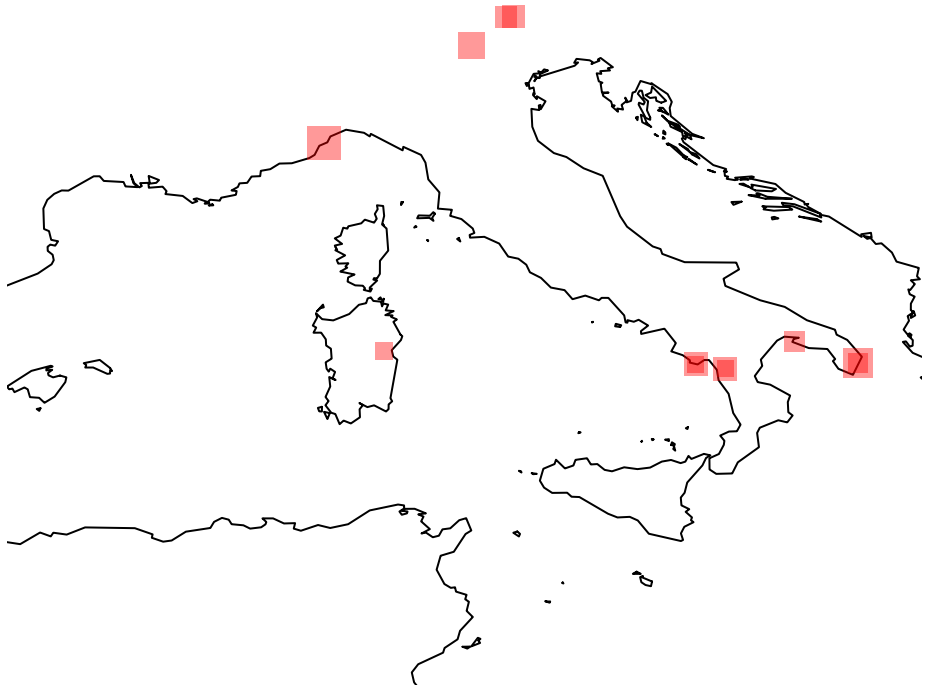

9280 cal. BC

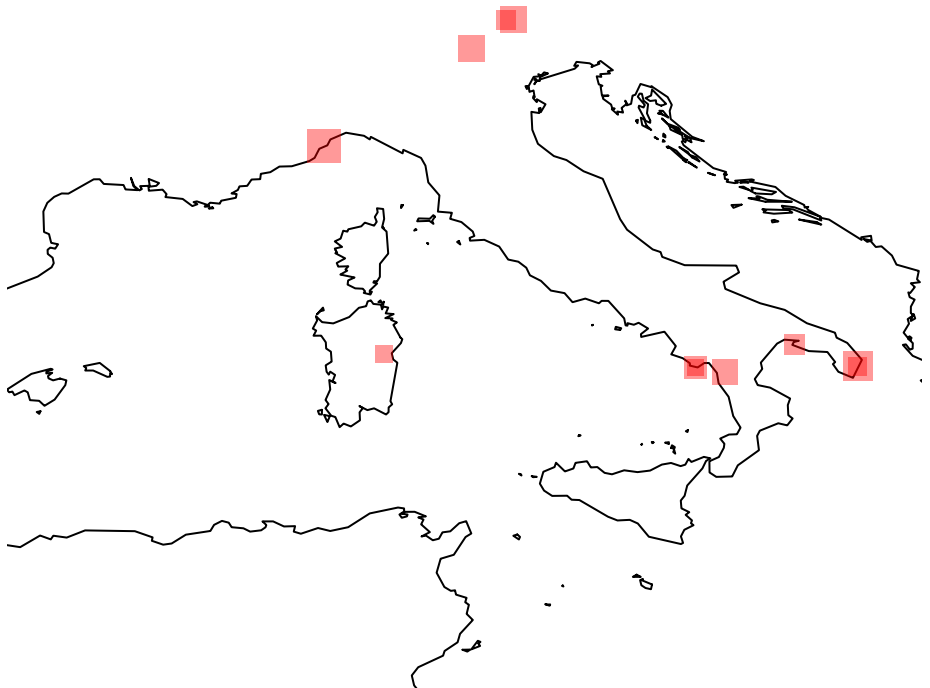

9275 cal. BC

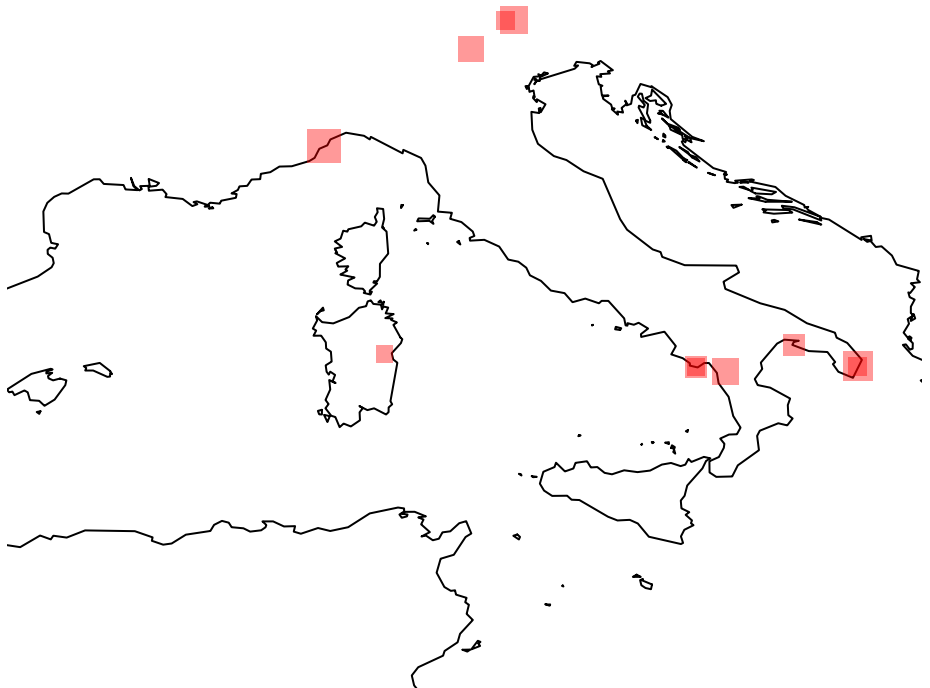

9270 cal. BC

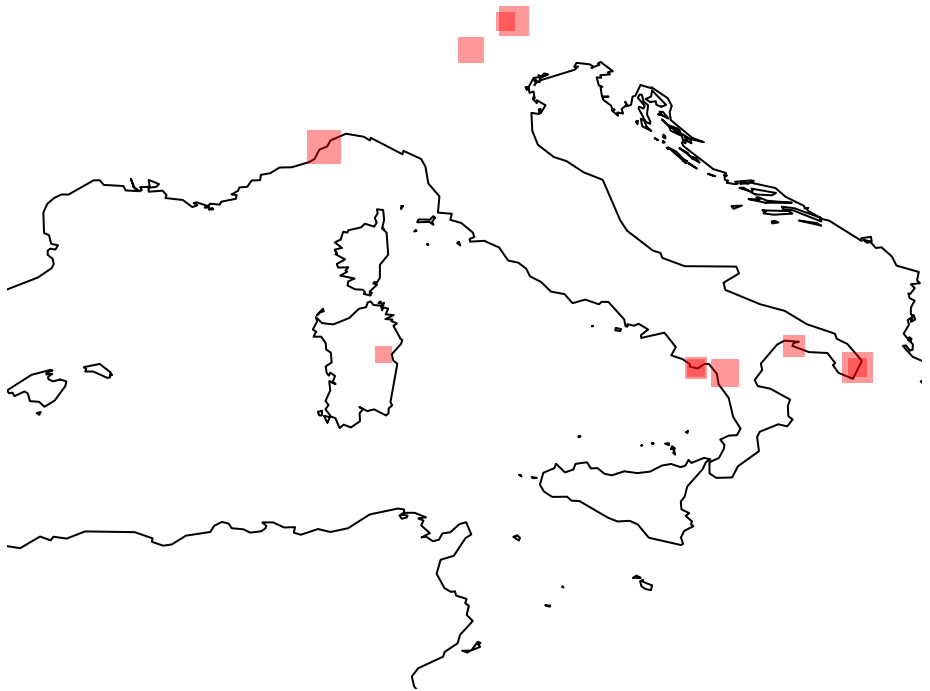

9265 cal. BC

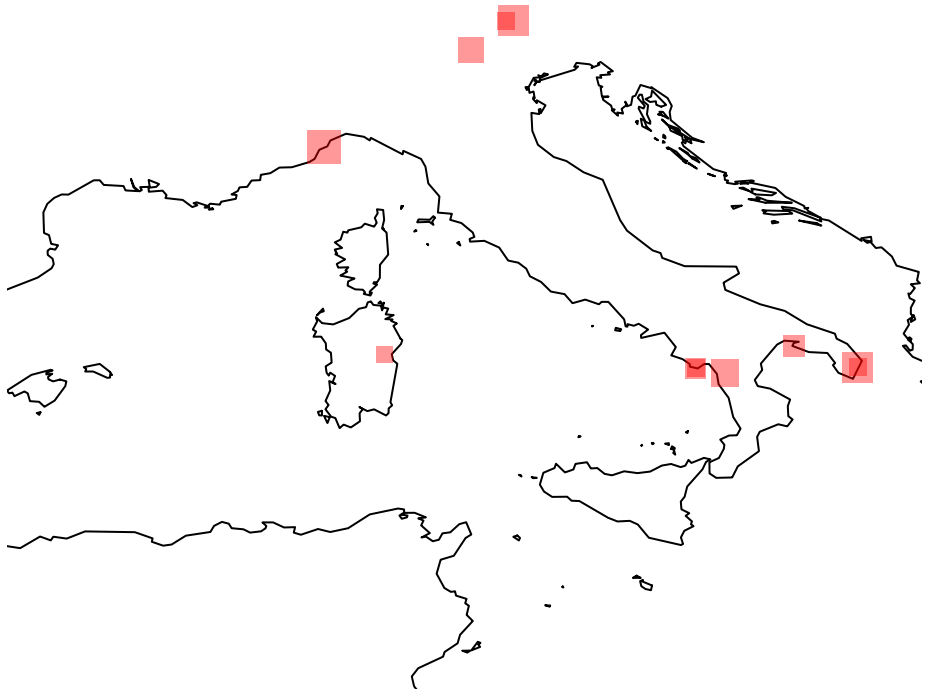

9260 cal. BC

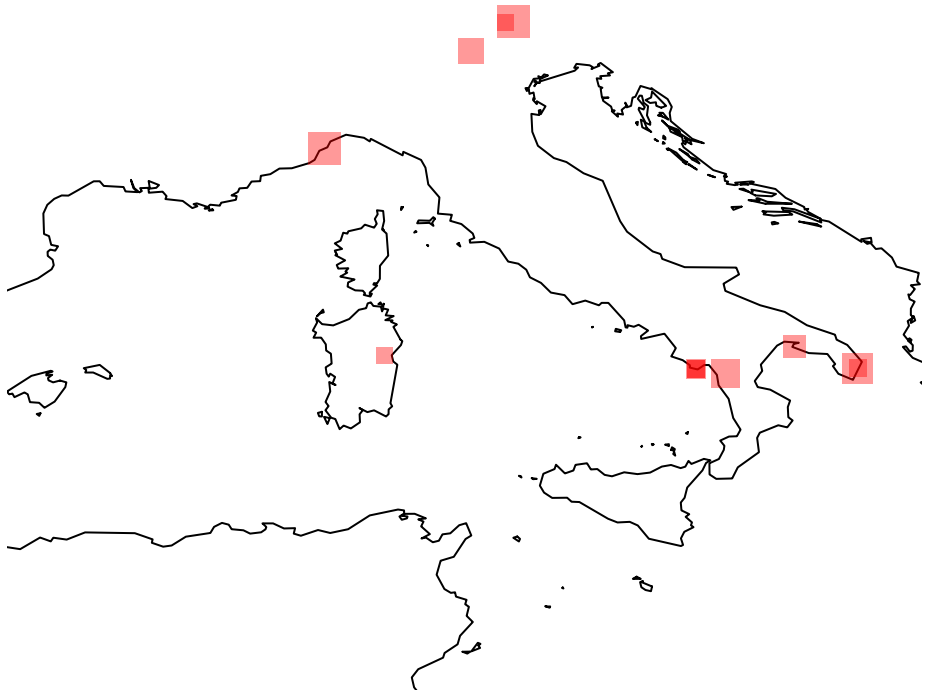

9255 cal. BC

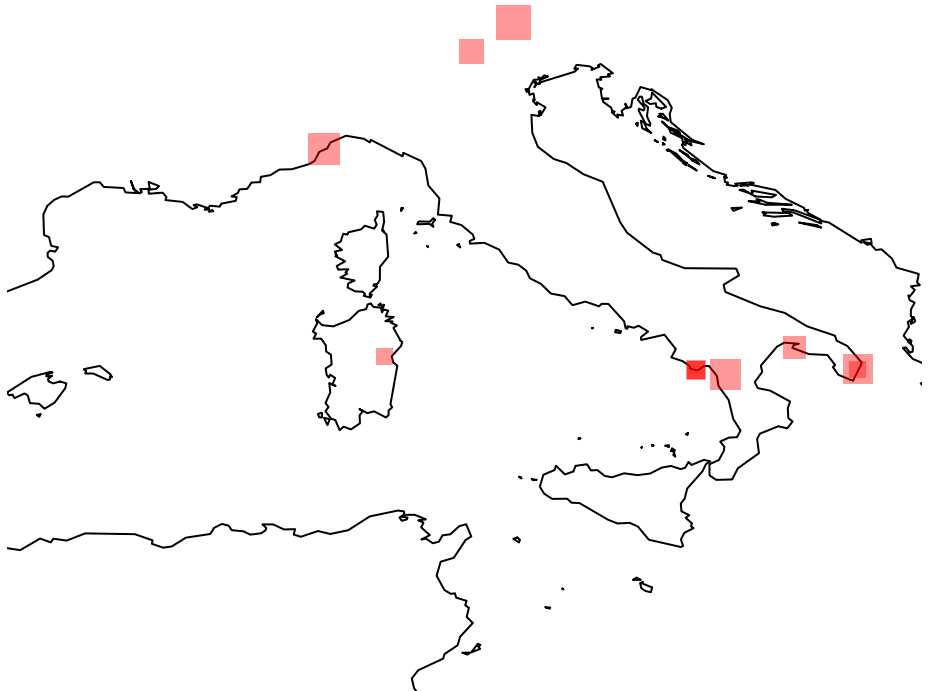

9250 cal. BC

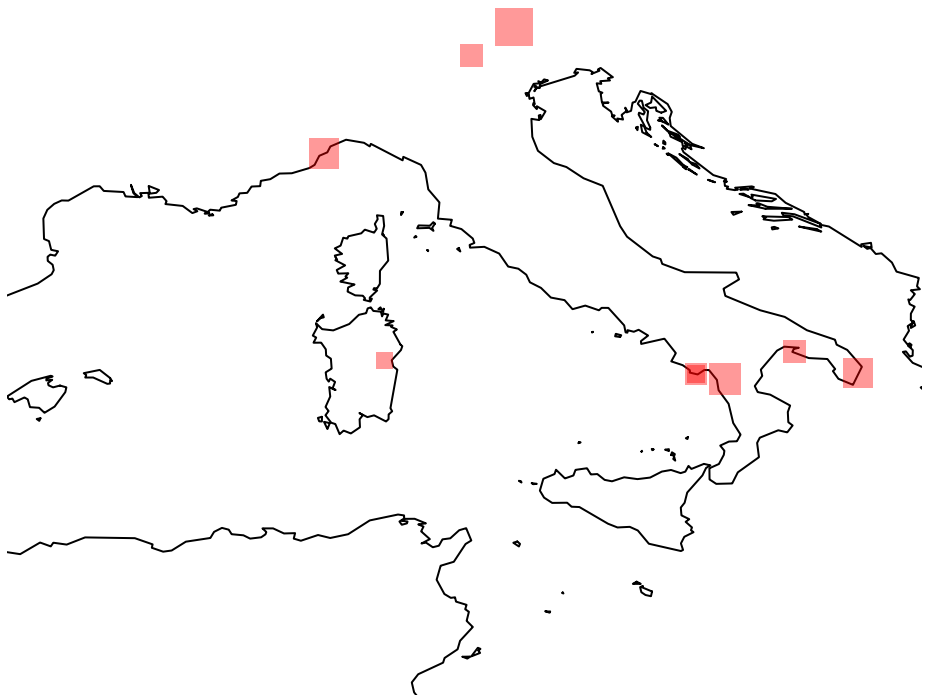



9245 cal. BC

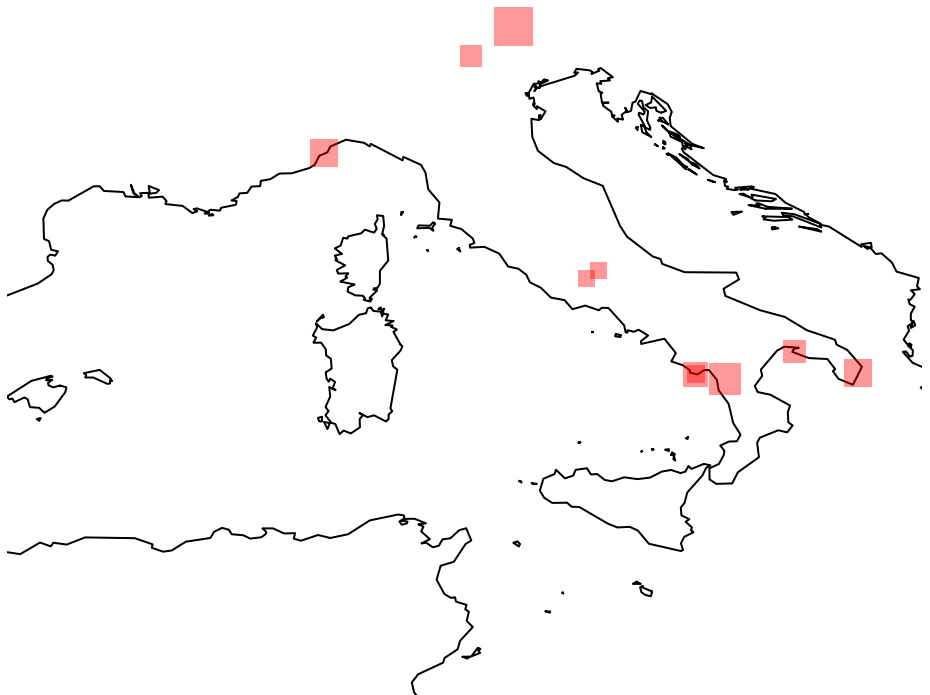

9240 cal. BC

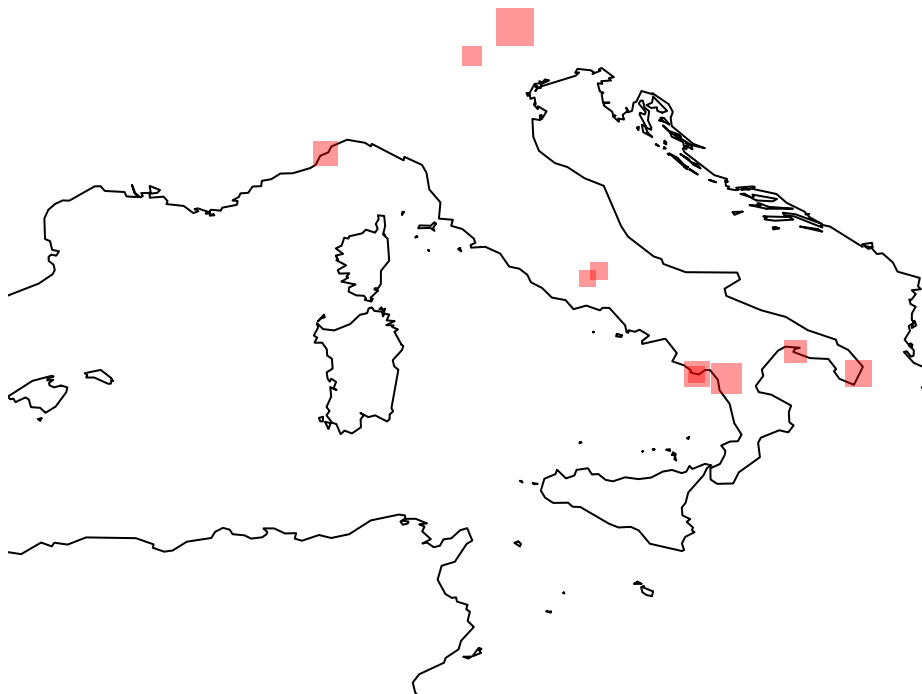

9235 cal. BC

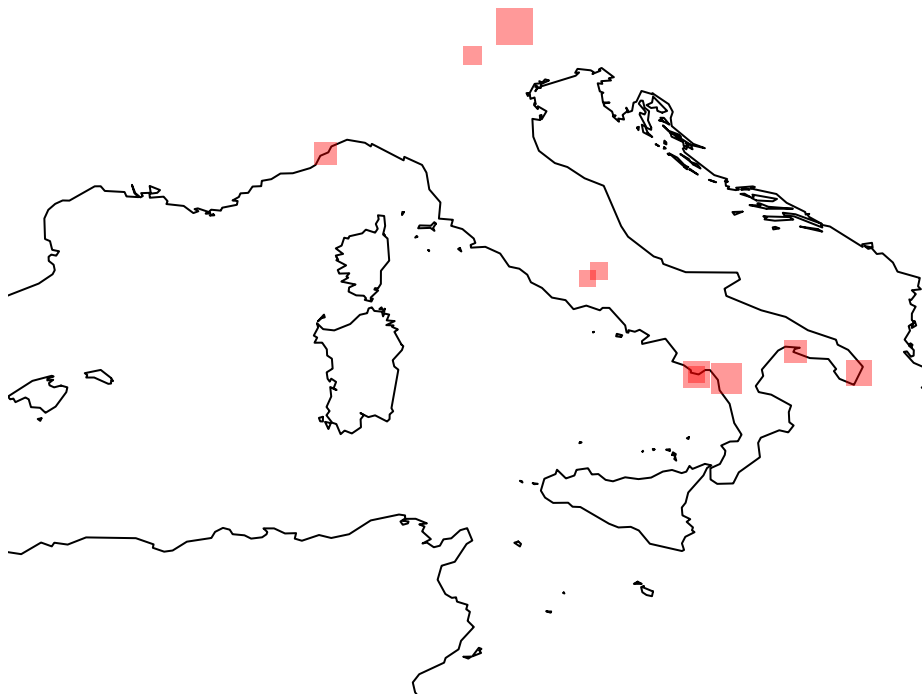

9230 cal. BC

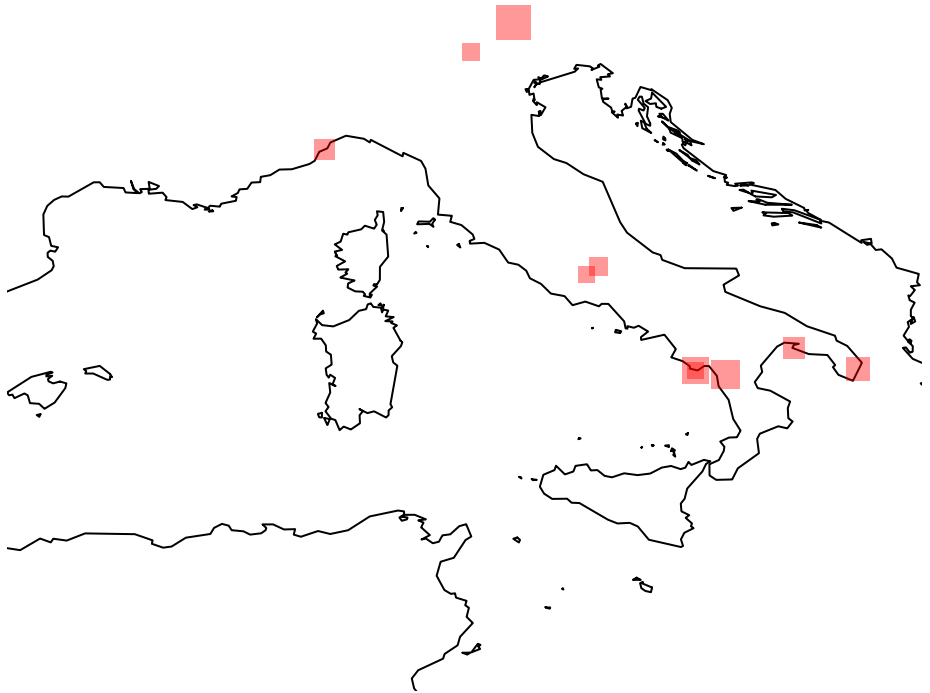

9225 cal. BC

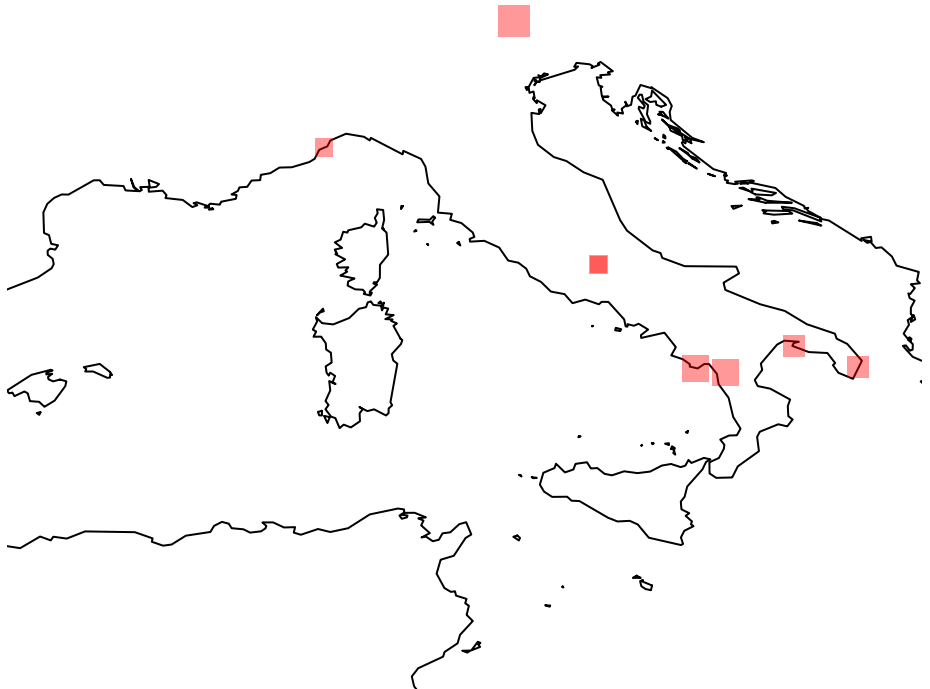

9220 cal. BC

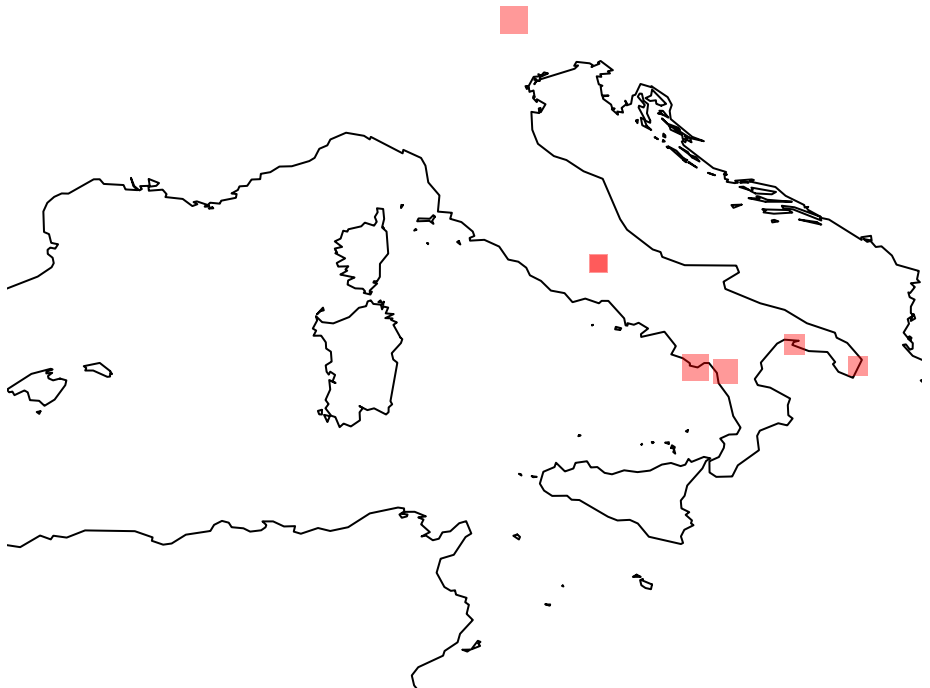

9215 cal. BC

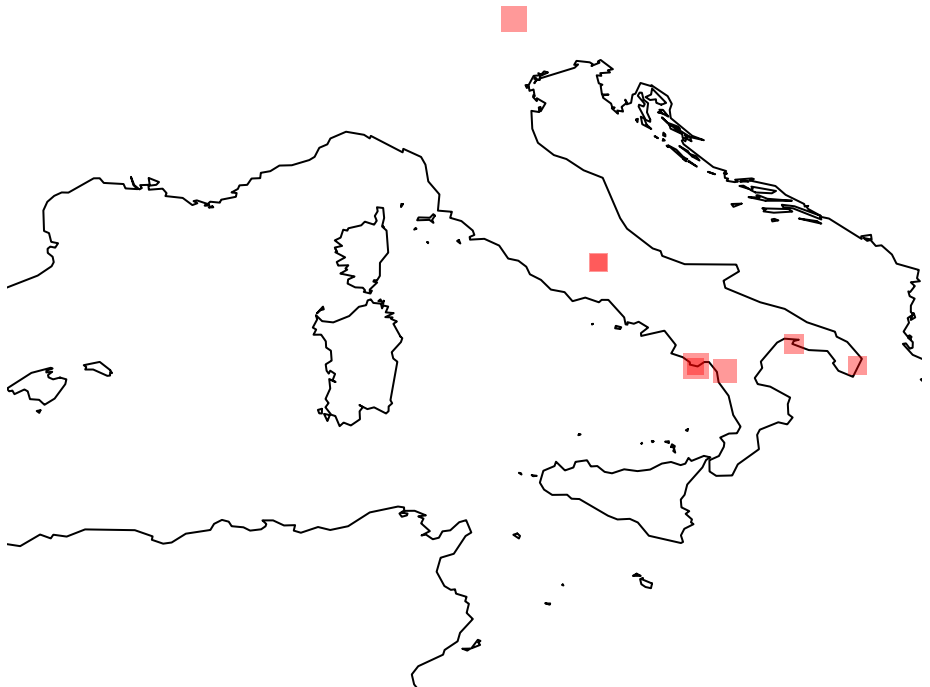

9210 cal. BC

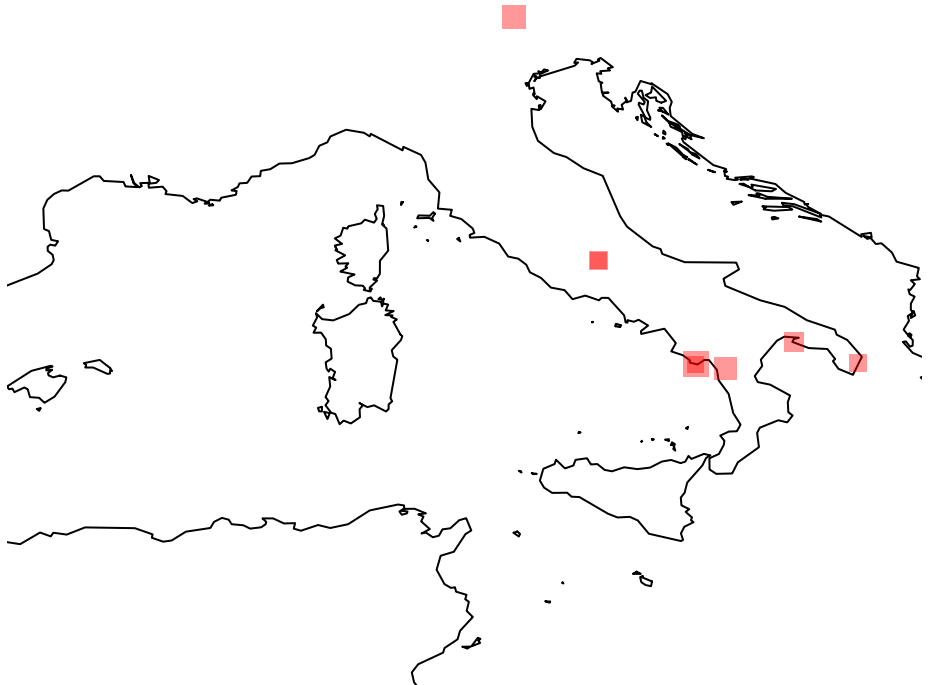



9205 cal. BC

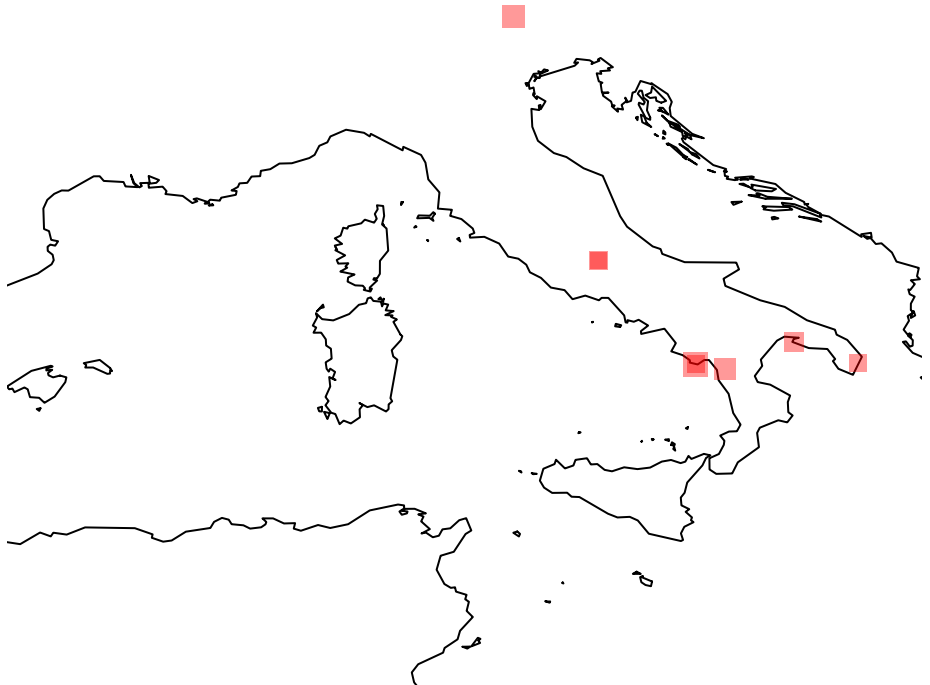

9200 cal. BC

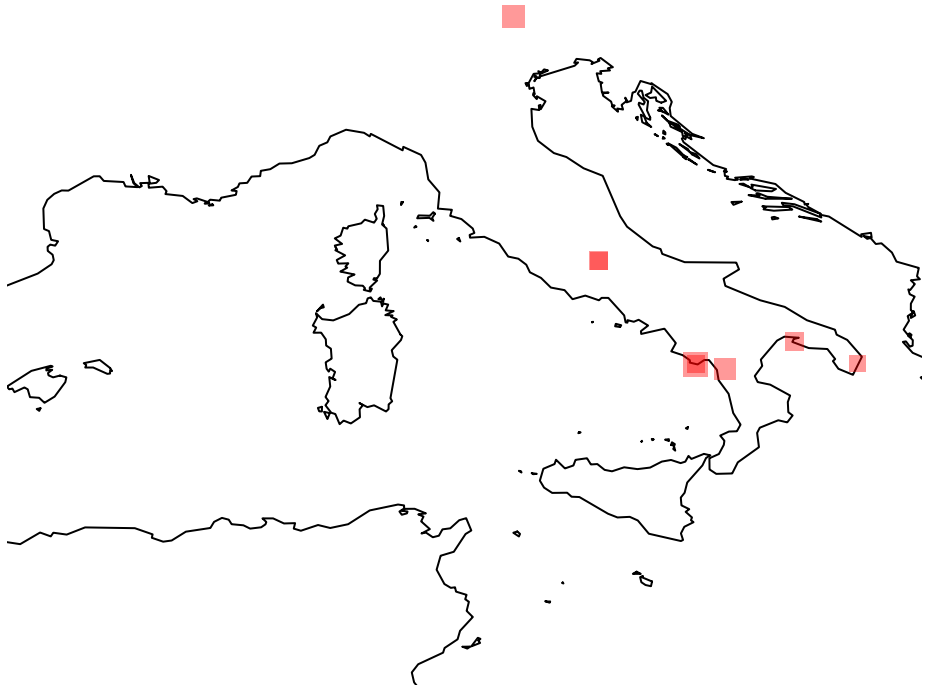

9195 cal. BC

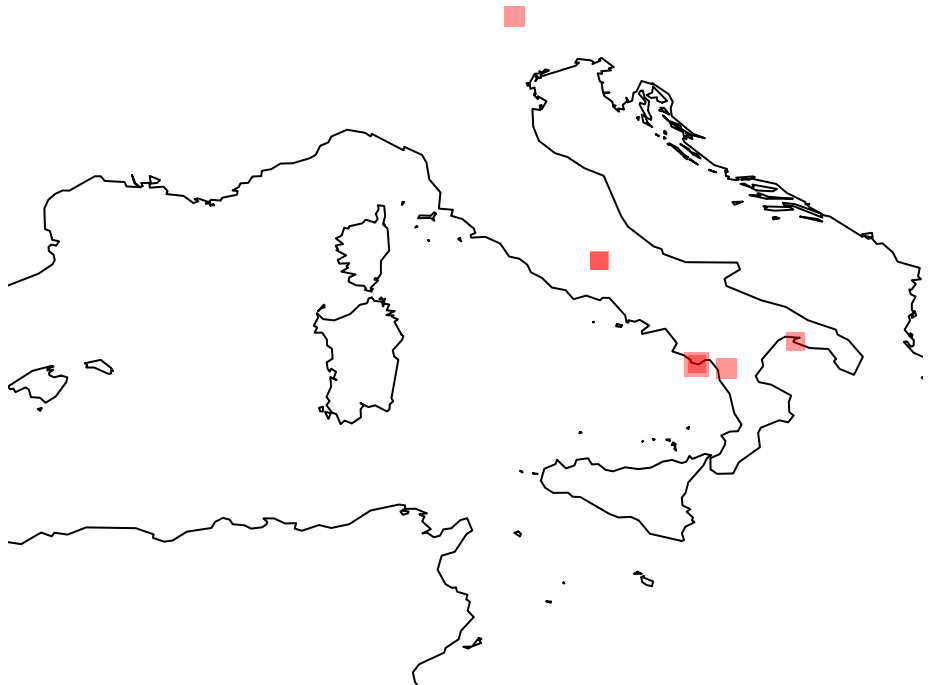

9190 cal. BC

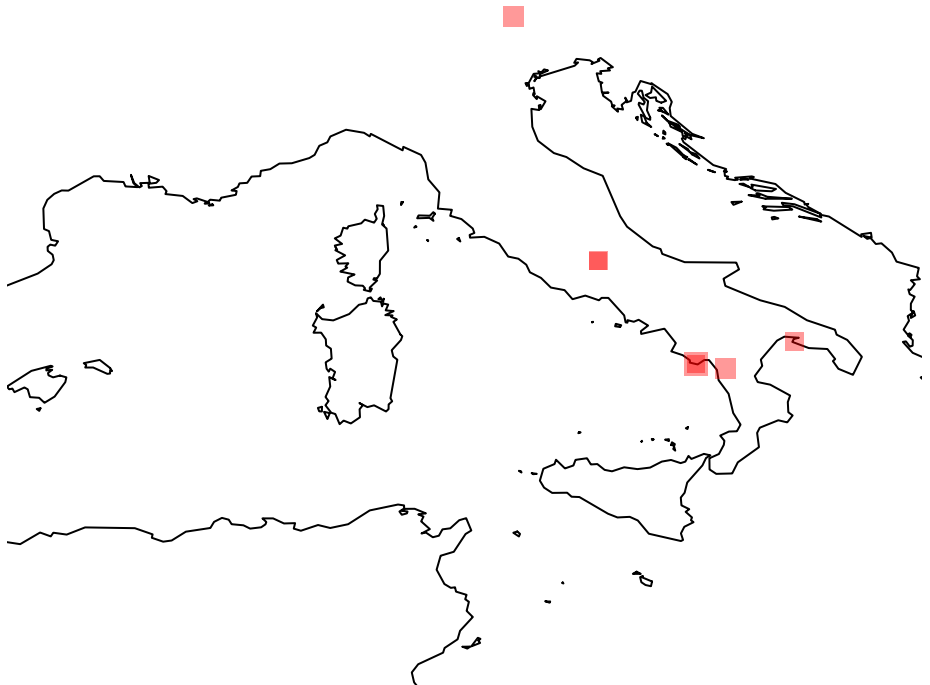

9185 cal. BC

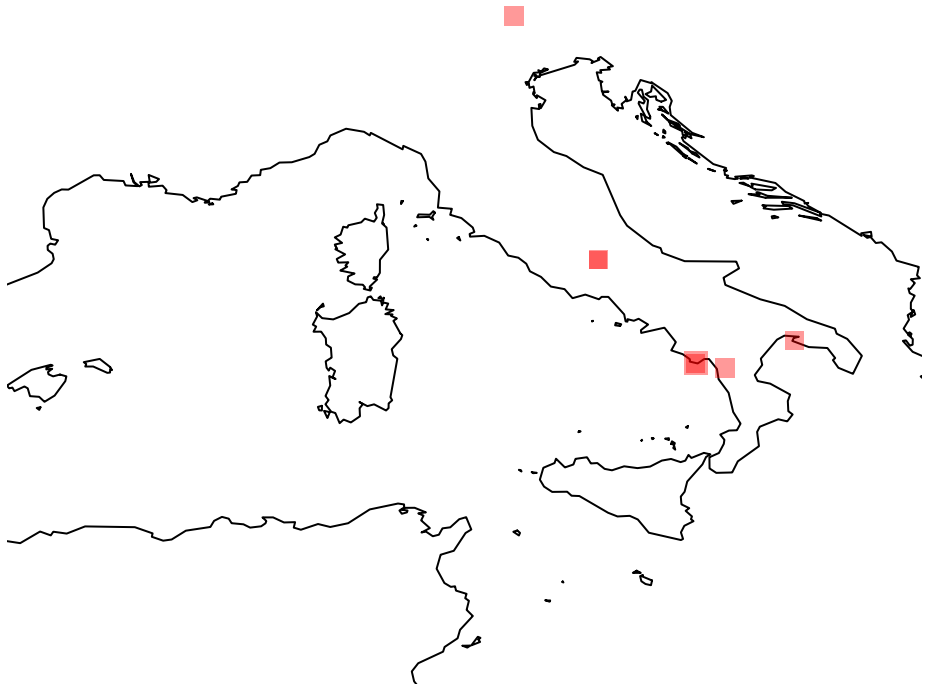

9180 cal. BC

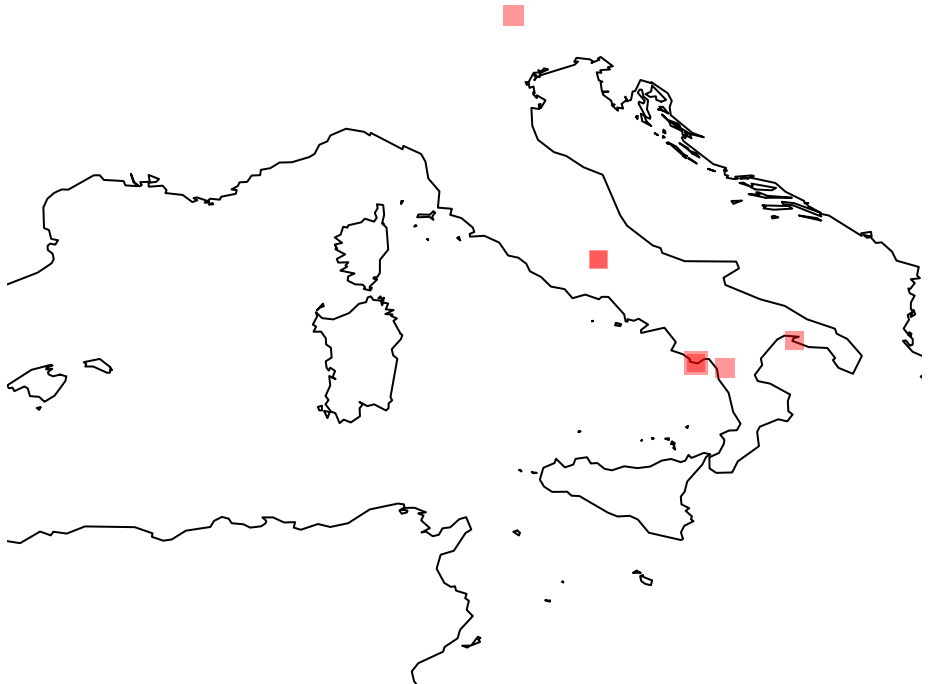

9175 cal. BC

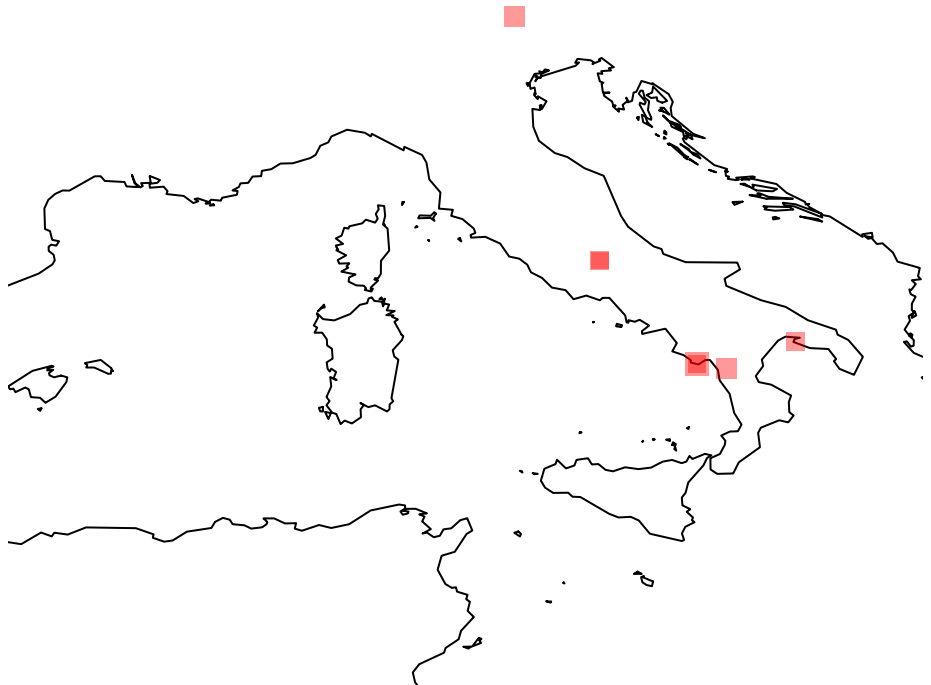

9170 cal. BC

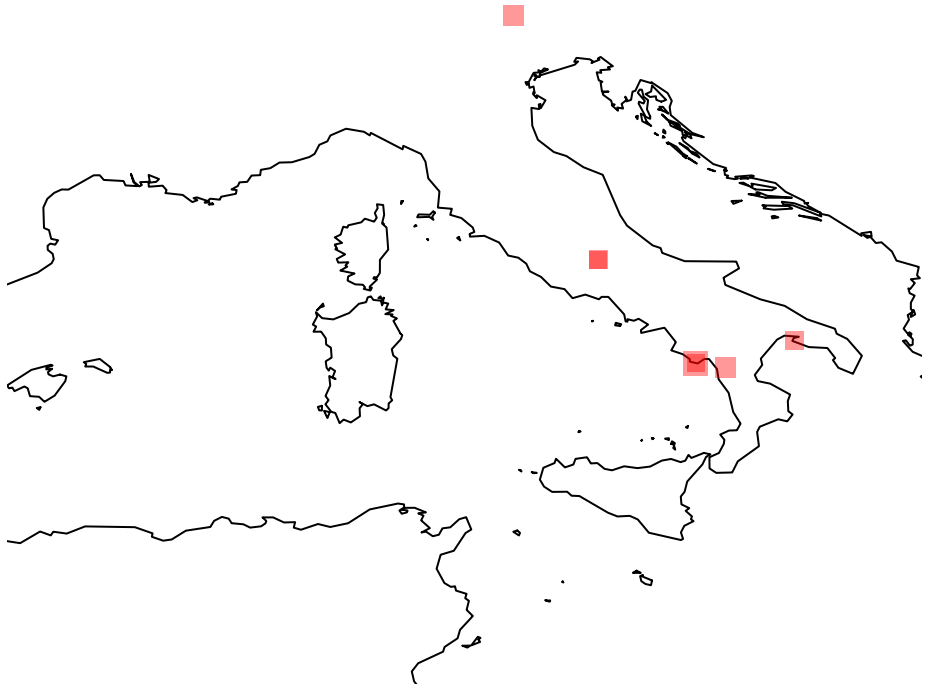



9165 cal. BC

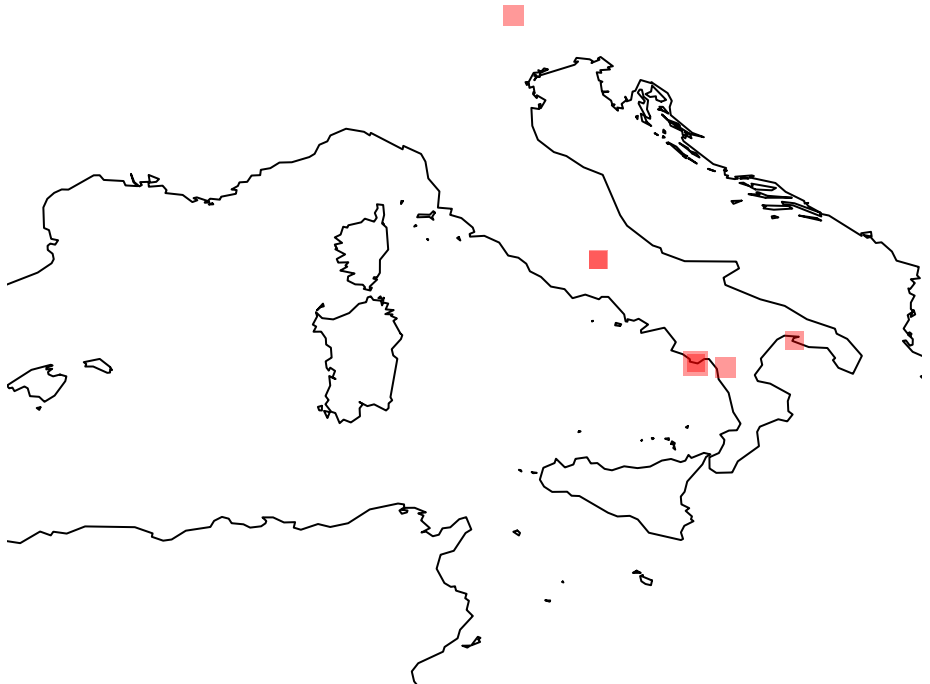

9160 cal. BC

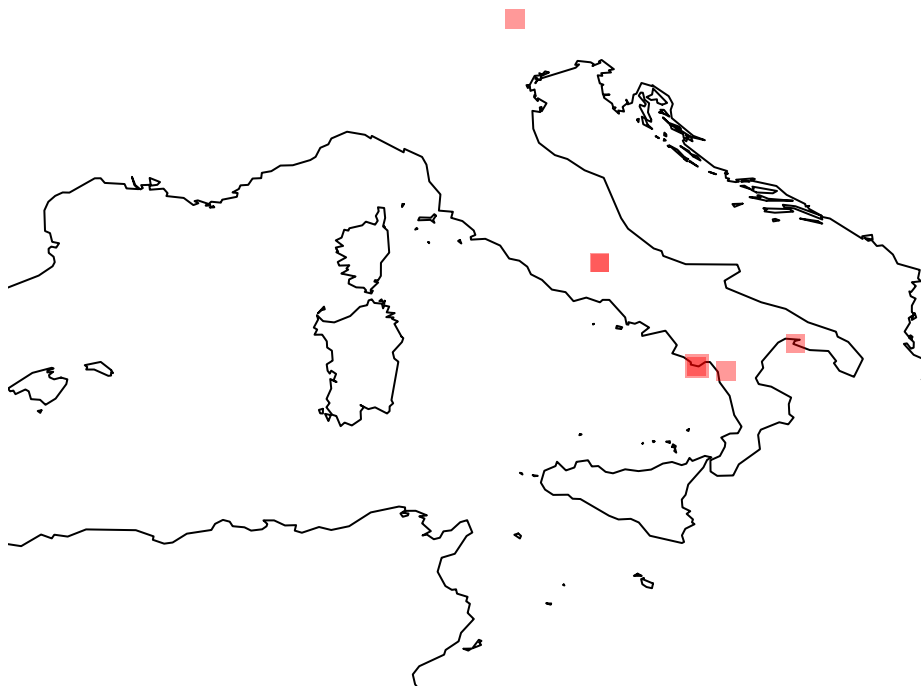

9155 cal. BC

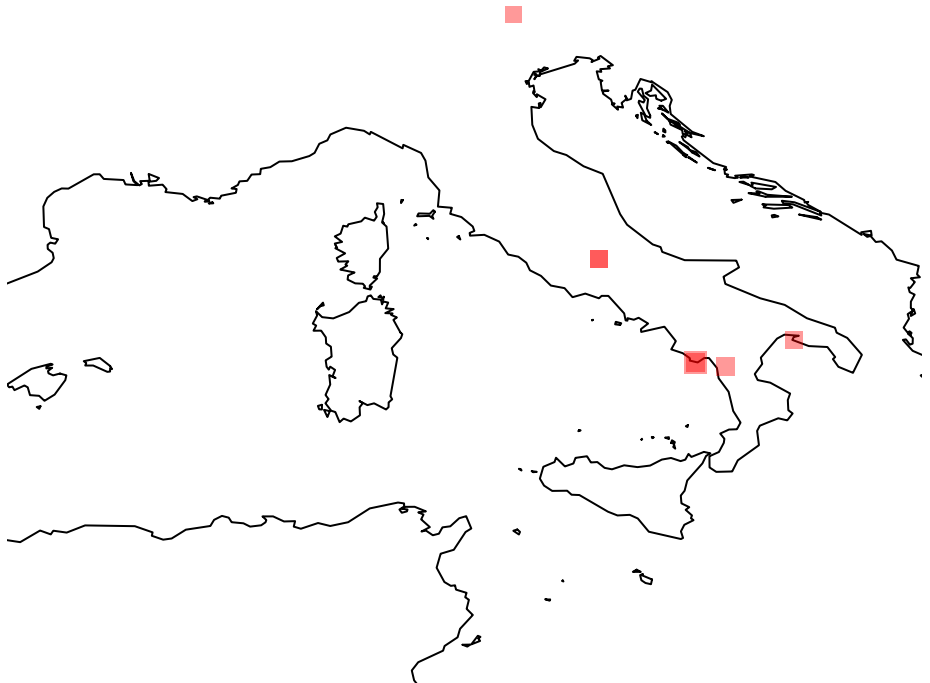

9150 cal. BC

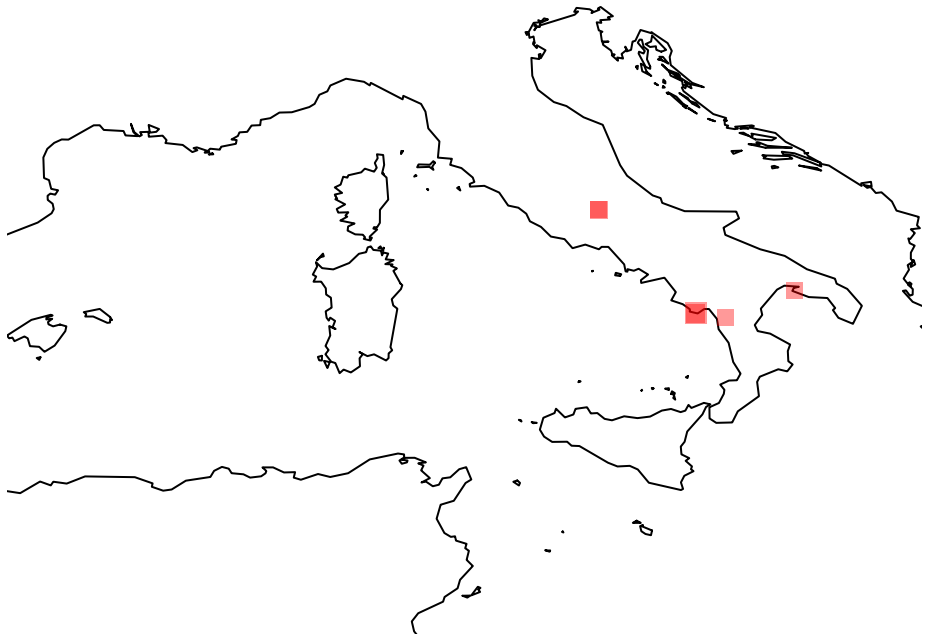

9145 cal. BC

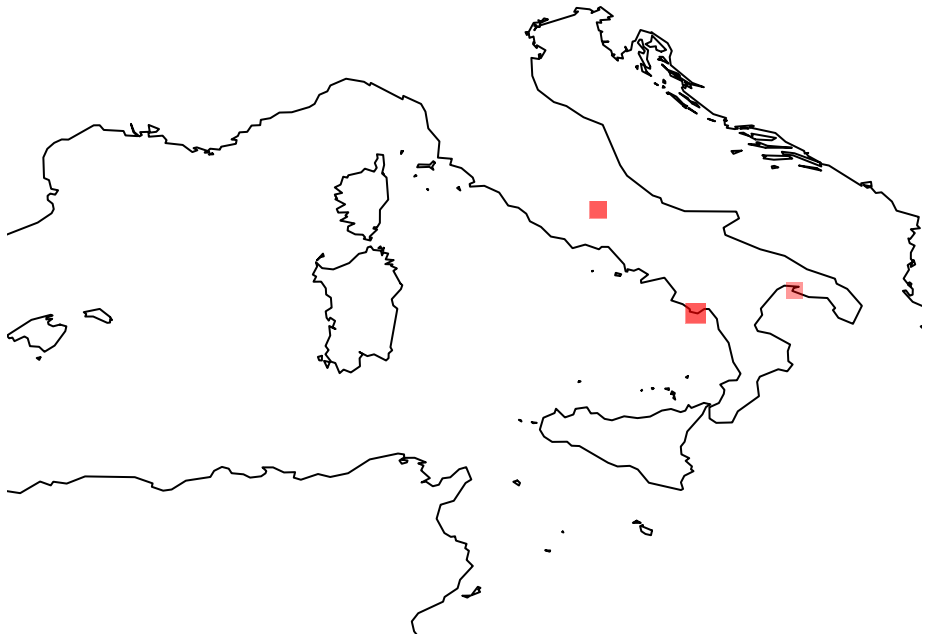

**9140 cal. BC**

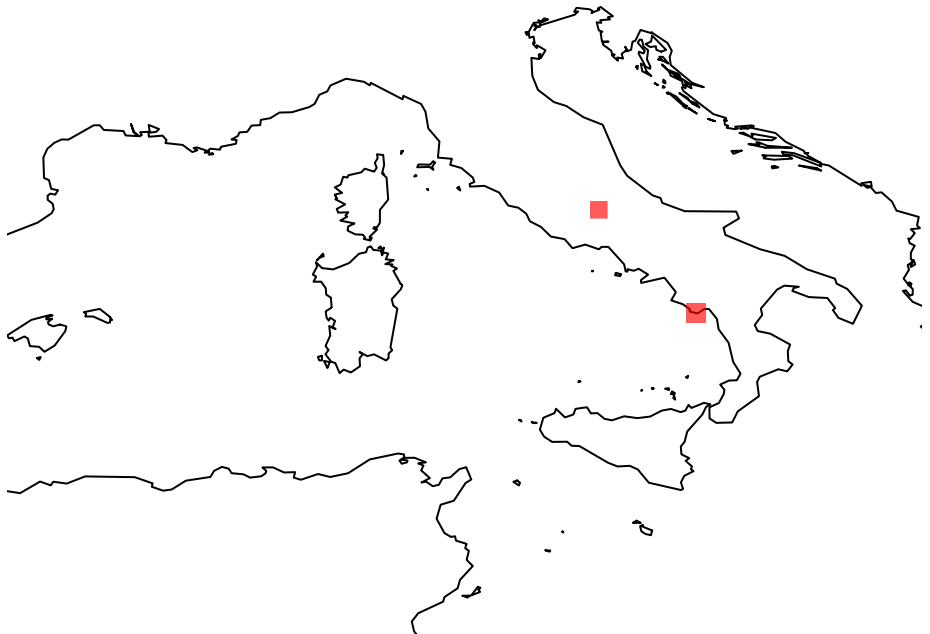

9135 cal. BC

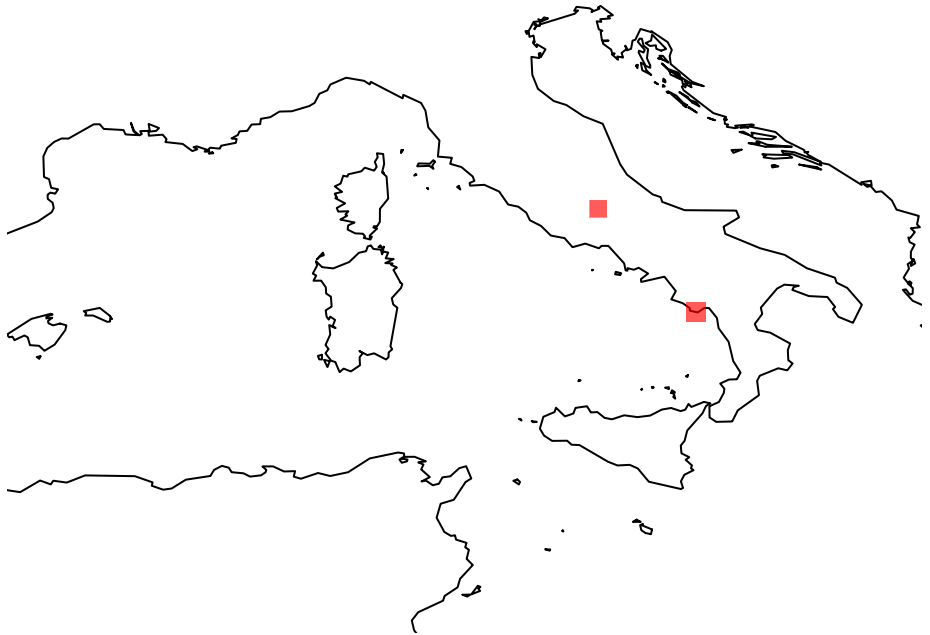

9130 cal. BC

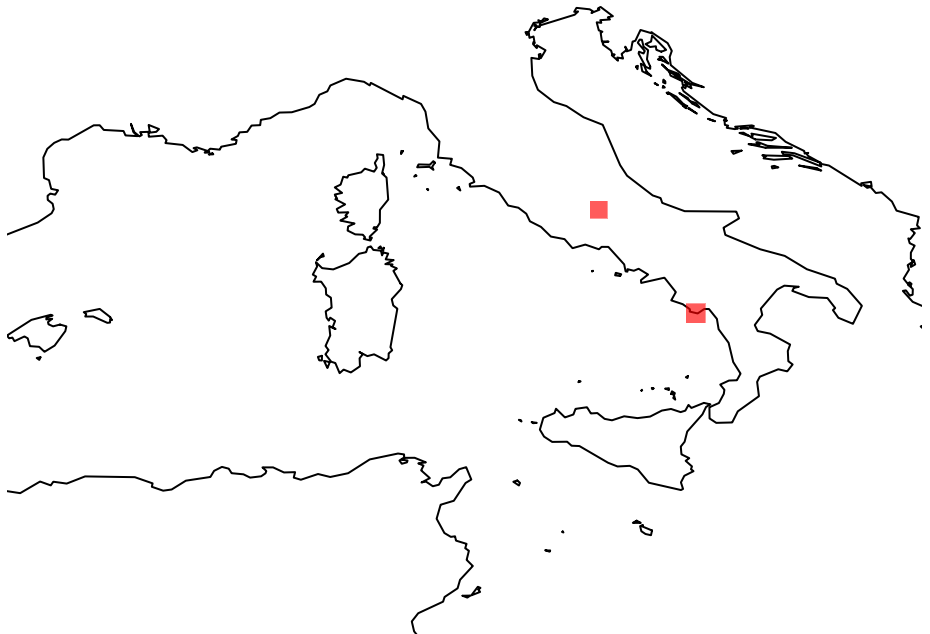



9125 cal. BC

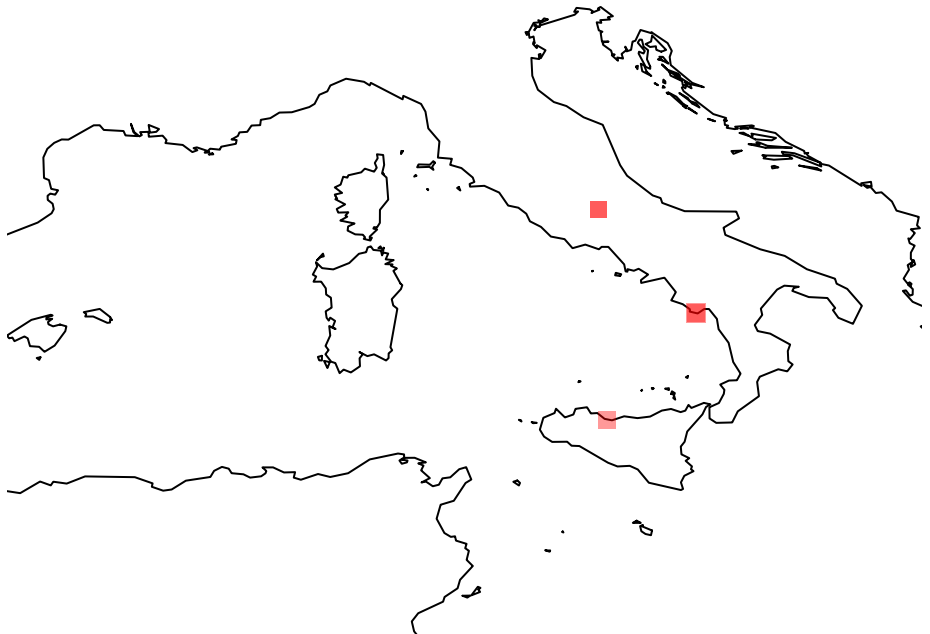

9120 cal. BC

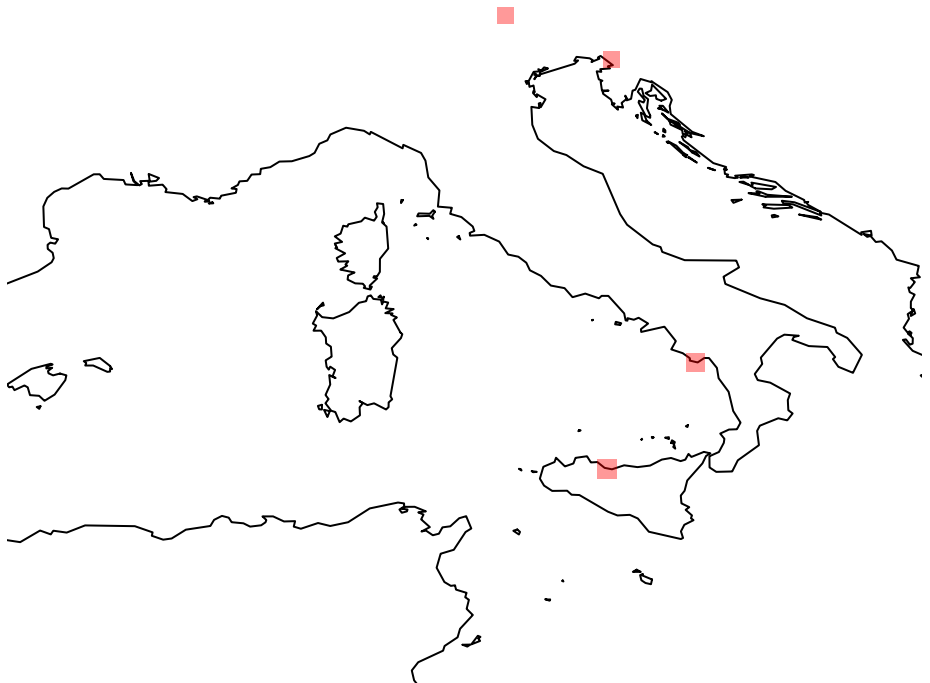

9115 cal. BC

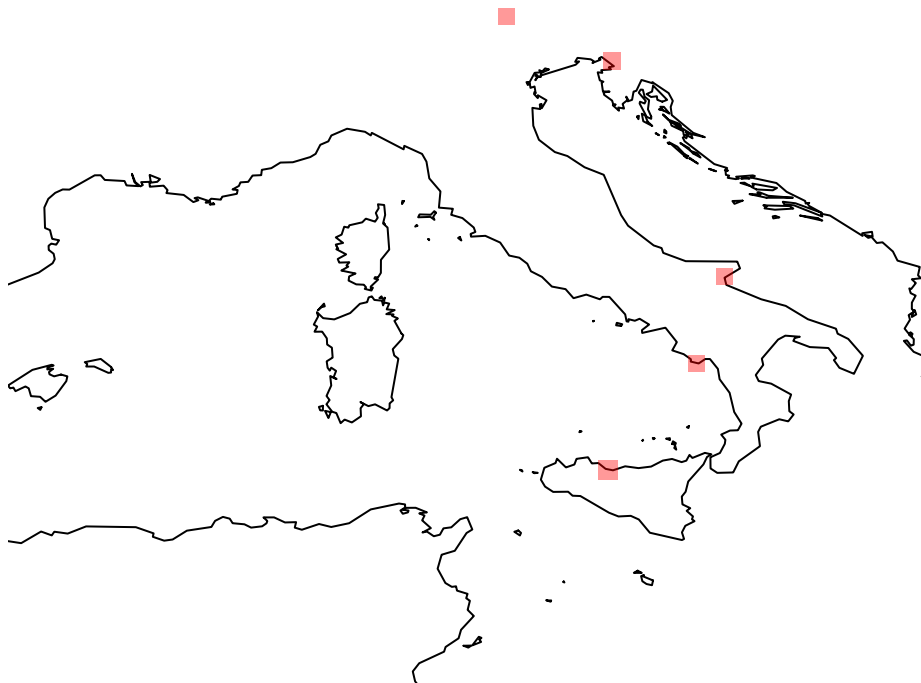

9110 cal. BC

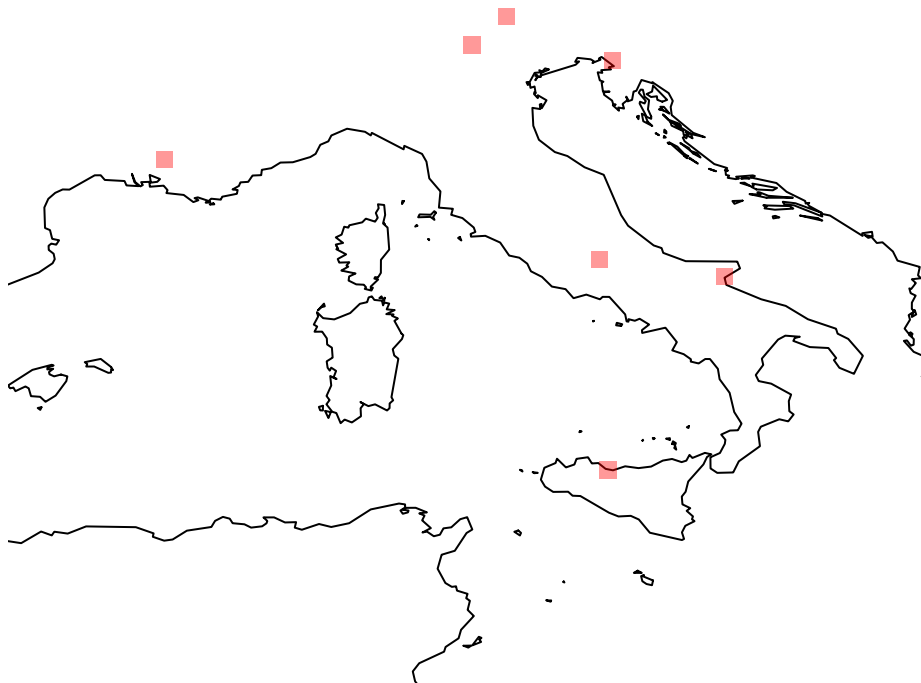

9105 cal. BC

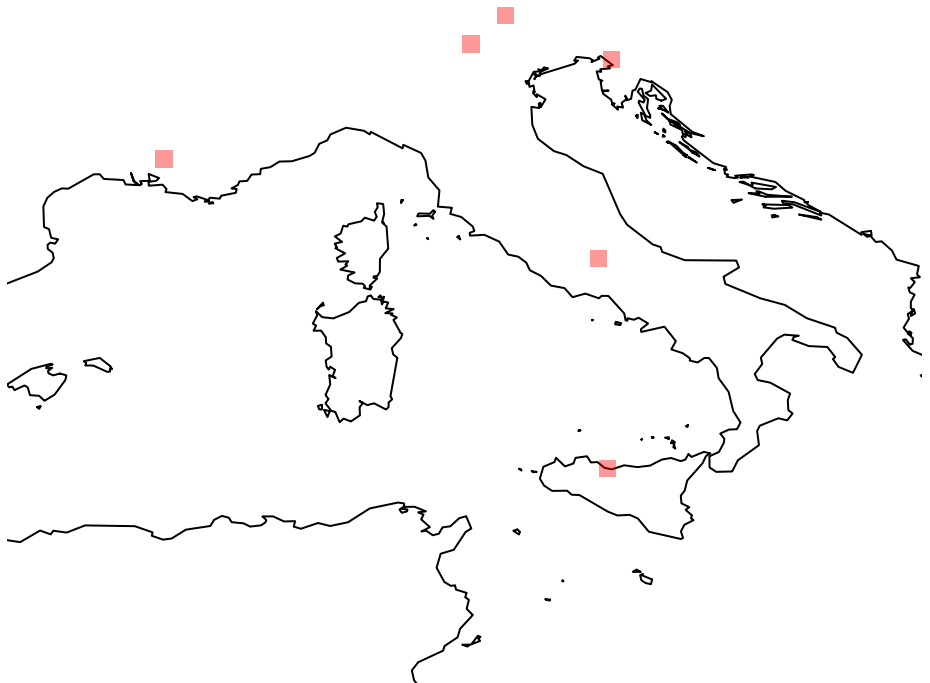

9100 cal. BC



9095 cal. BC

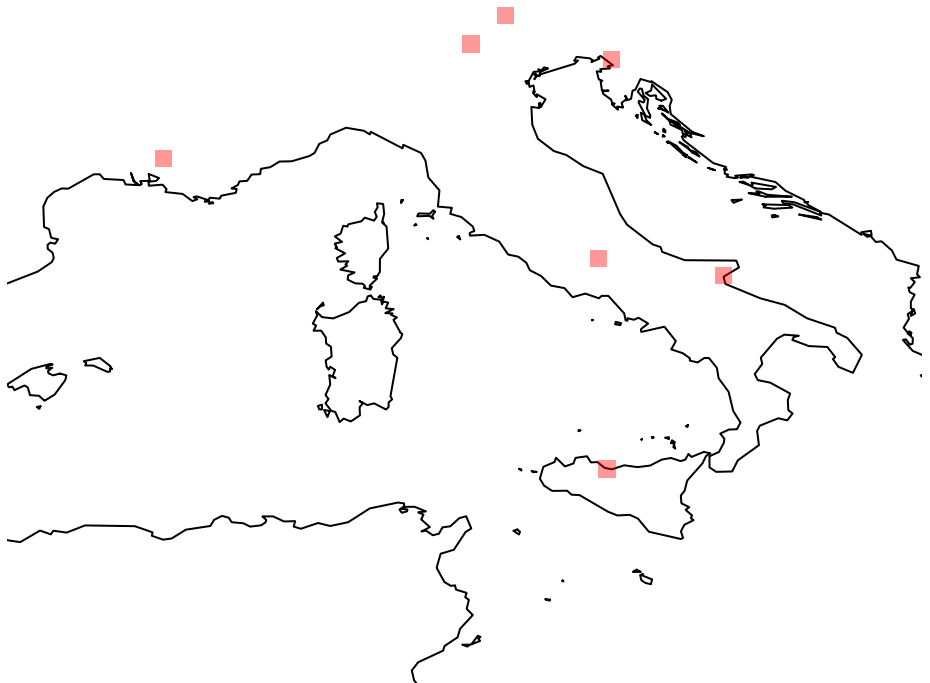

9090 cal. BC

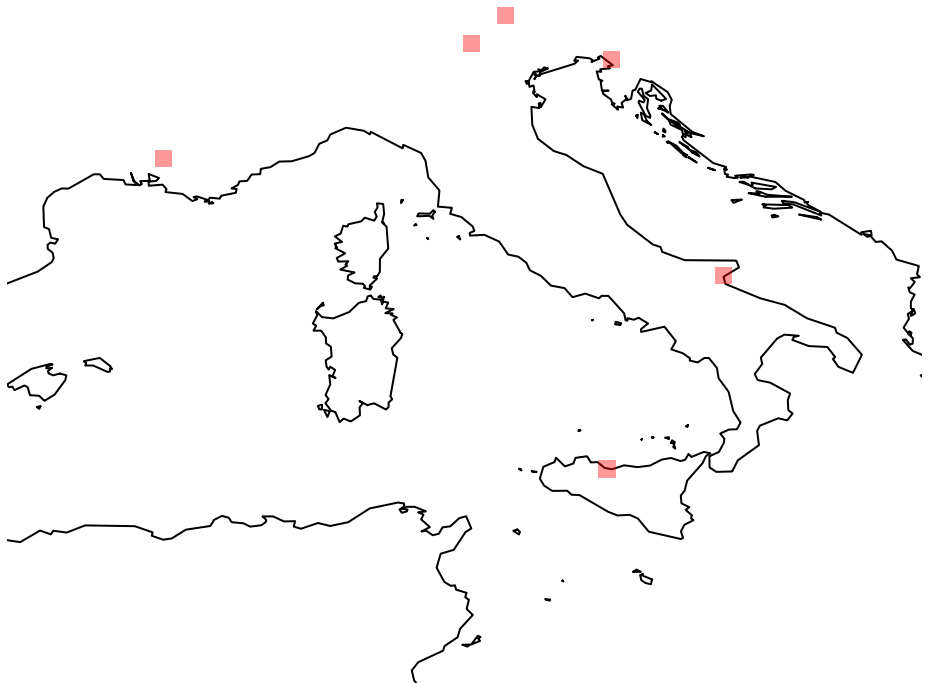



9085 cal. BC

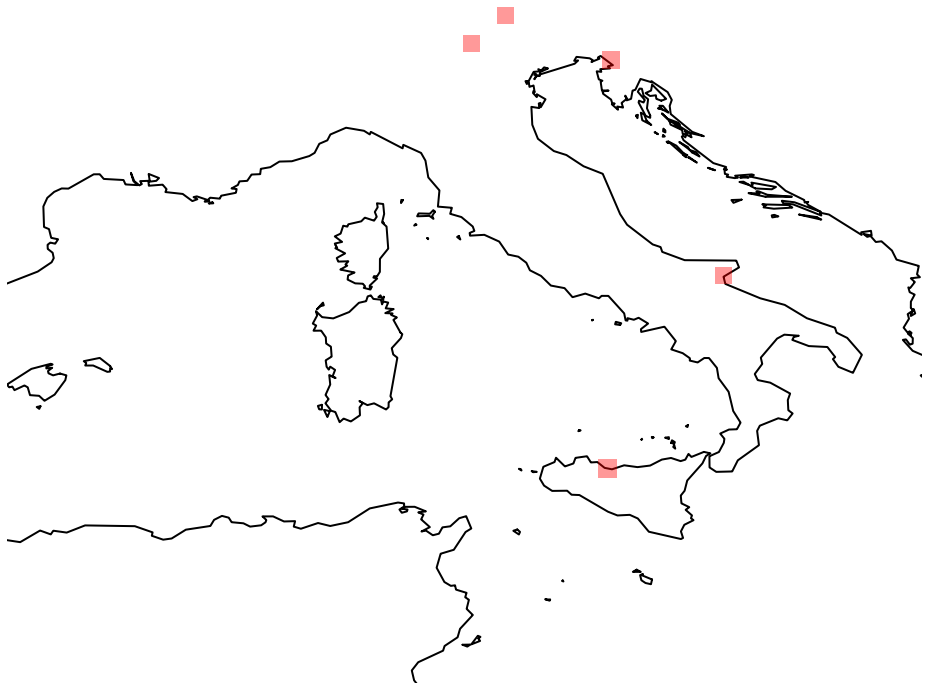

9080 cal. BC

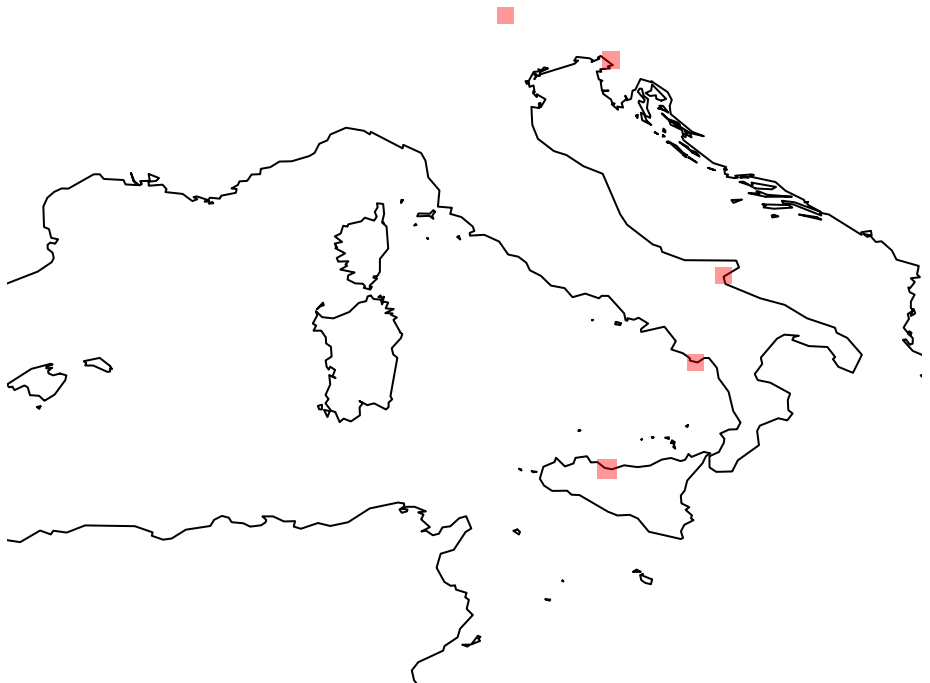

9075 cal. BC

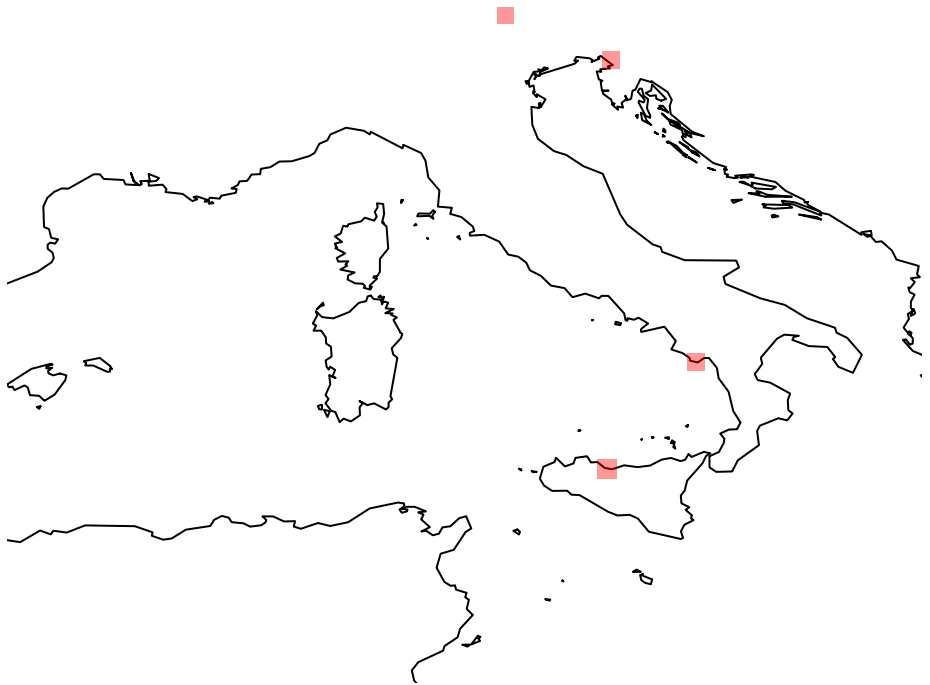

9070 cal. BC



9065 cal. BC

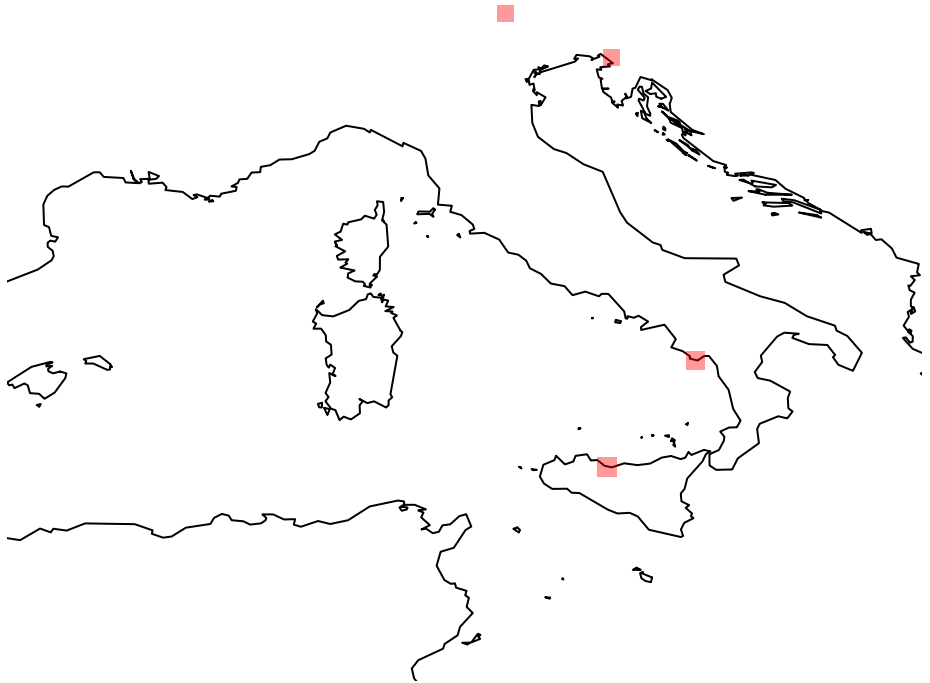

9060 cal. BC

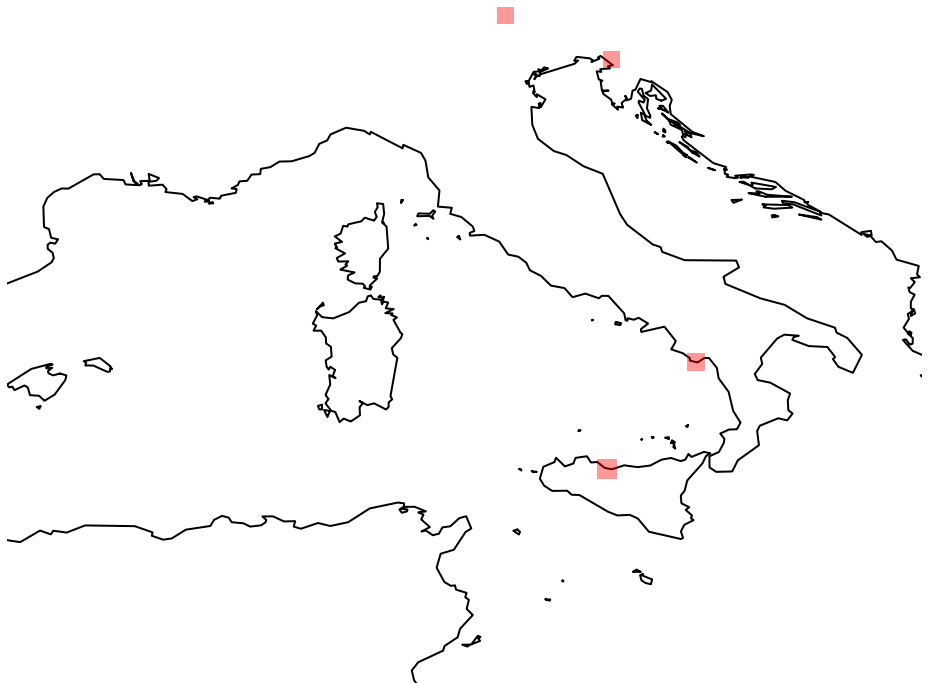

9055 cal. BC

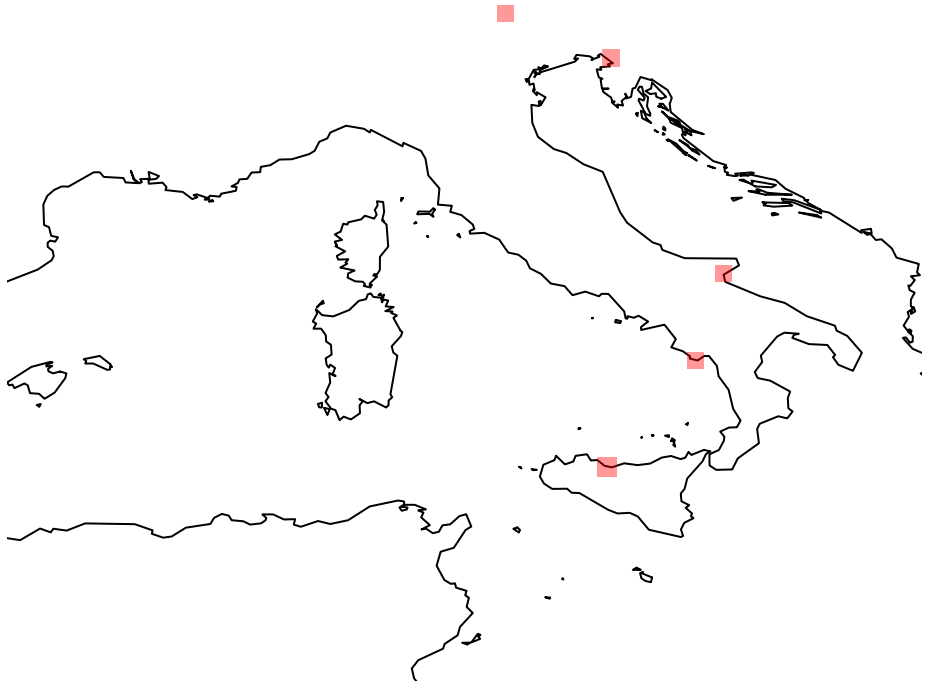

9050 cal. BC





9045 cal. BC



9040 cal. BC

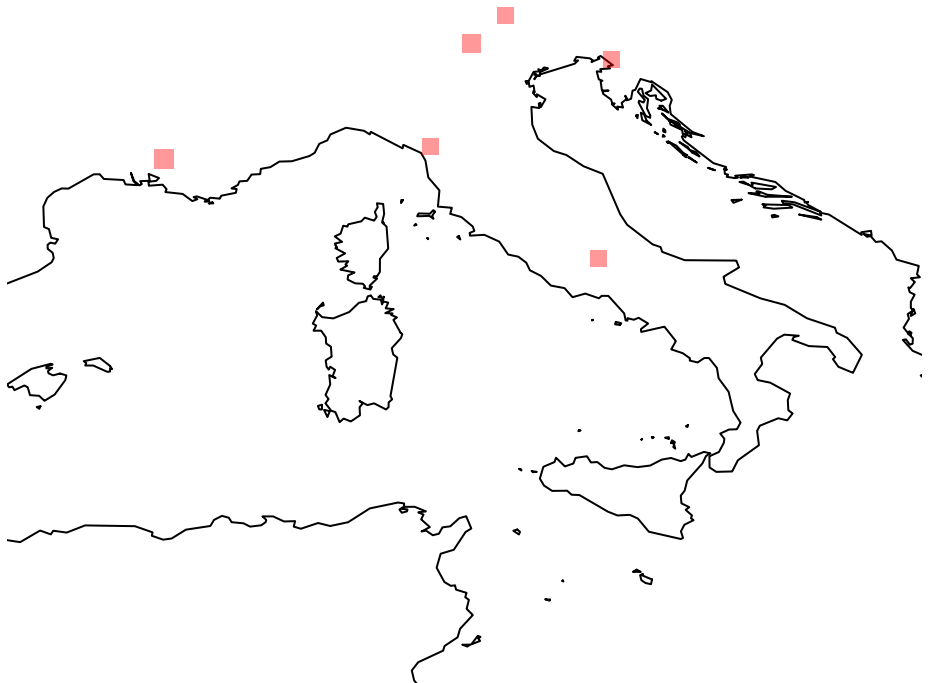

9035 cal. BC

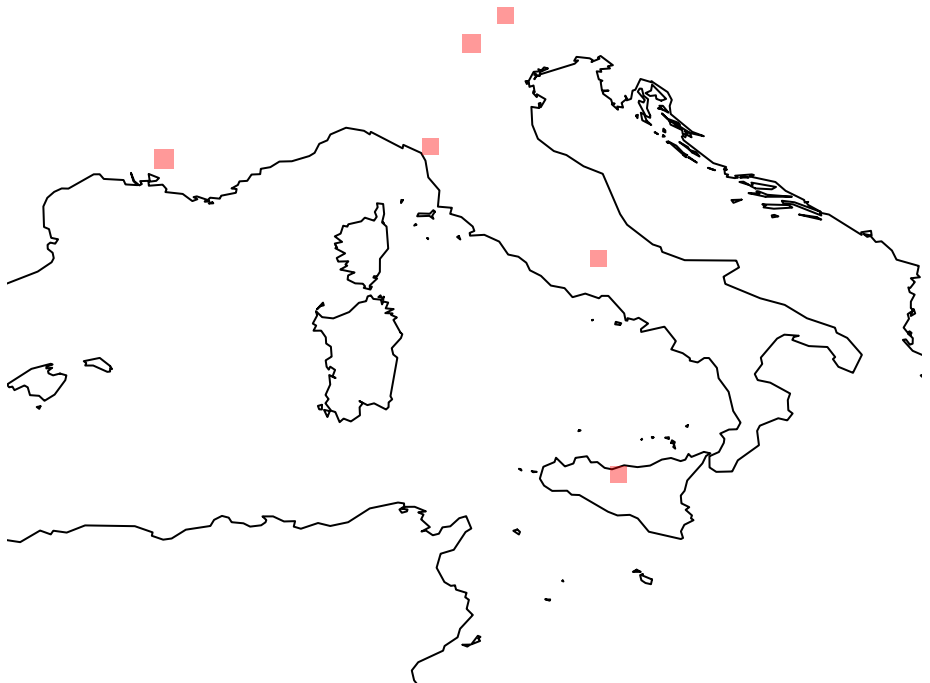

9030 cal. BC



9025 cal. BC



9020 cal. BC



9015 cal. BC



9010 cal. BC

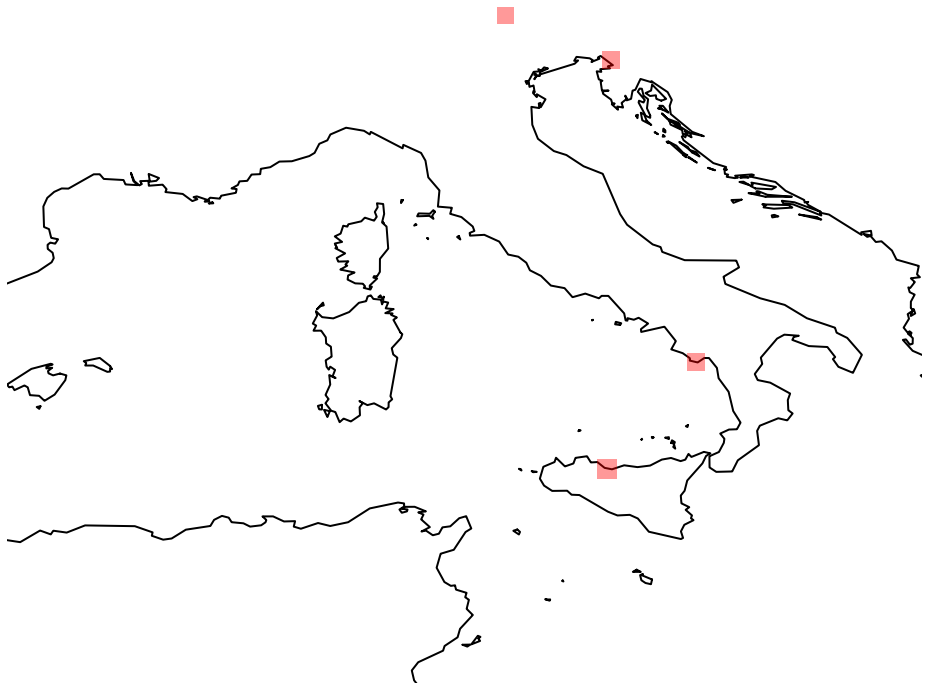



9005 cal. BC



9000 cal. BC

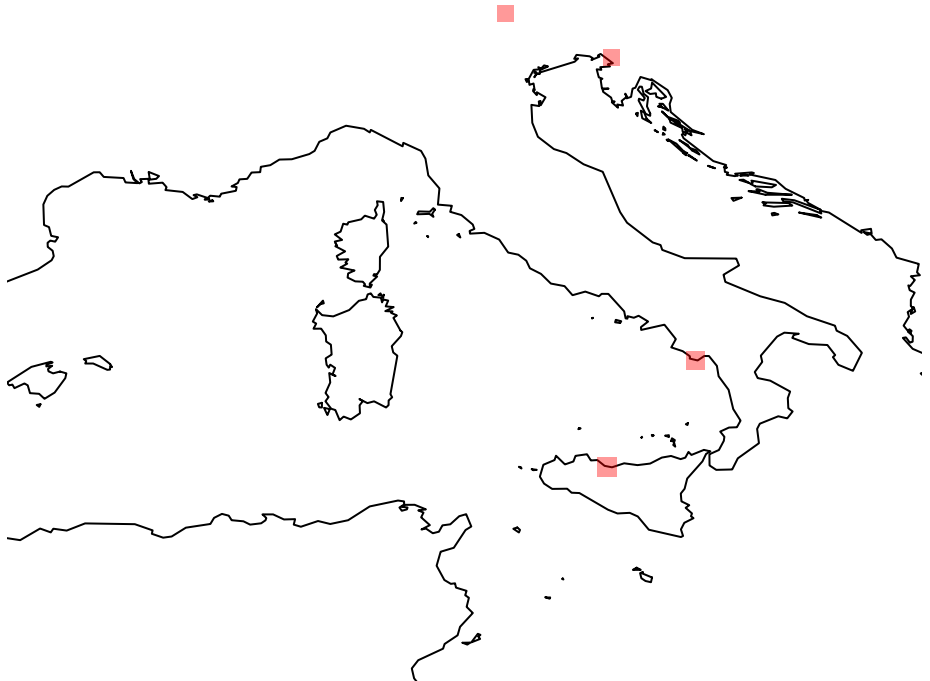

8995 cal. BC

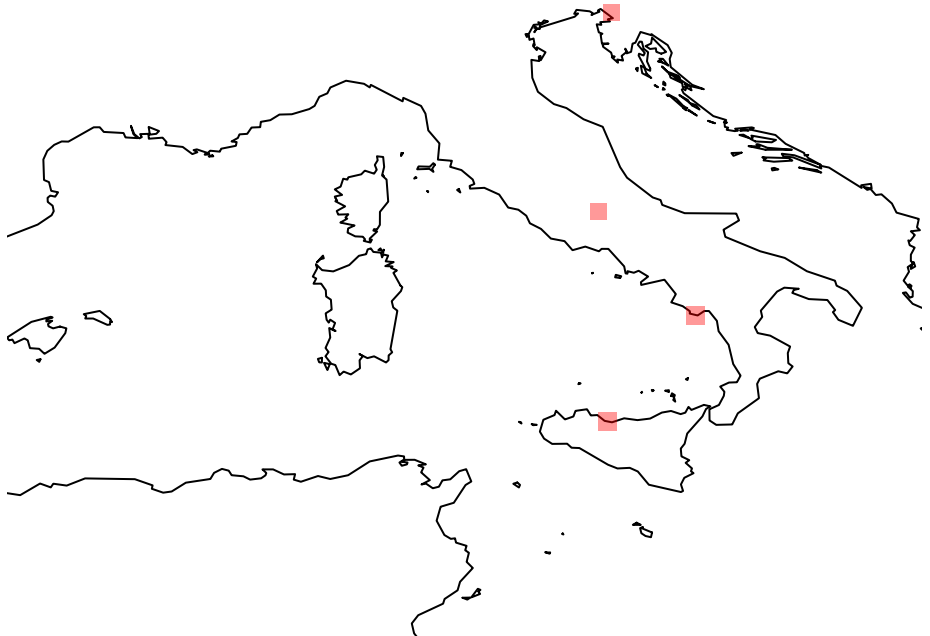

8990 cal. BC

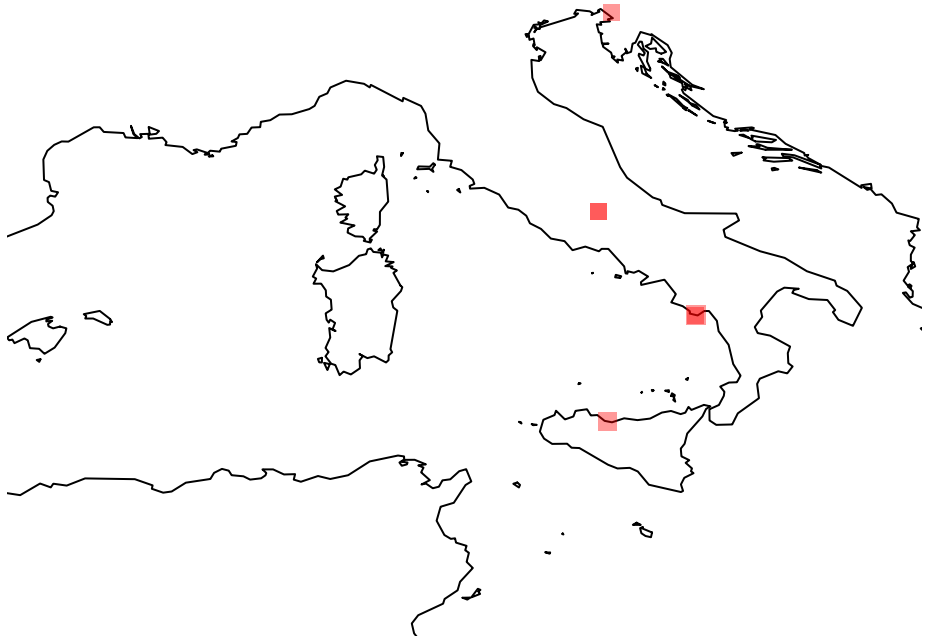

8985 cal. BC

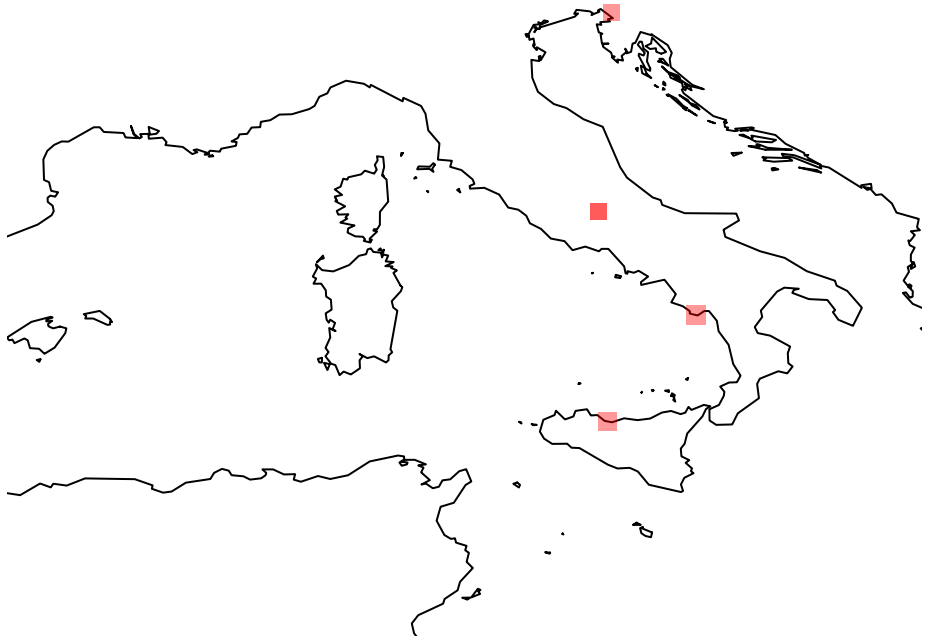

8980 cal. BC

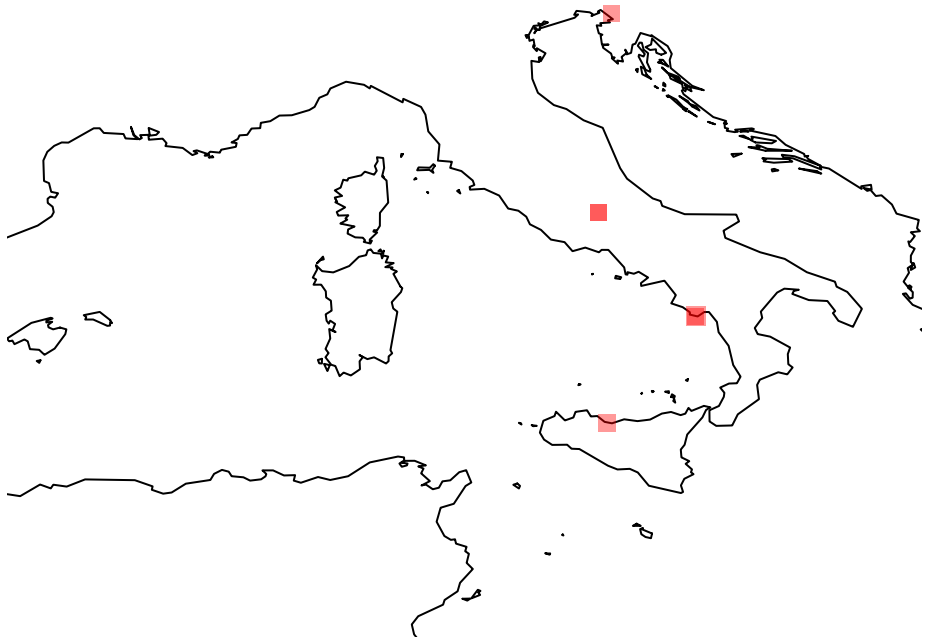

8975 cal. BC

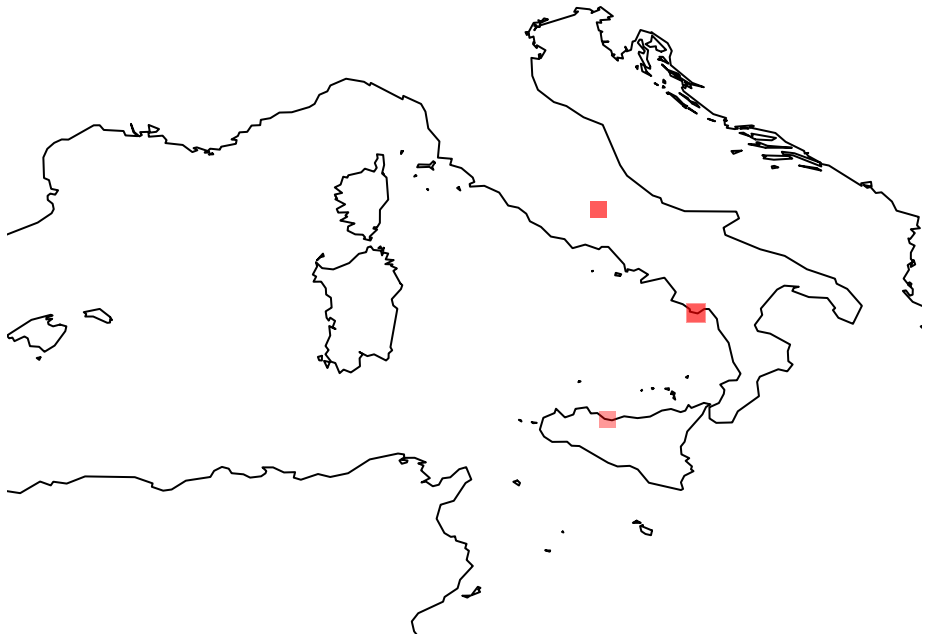

8970 cal. BC

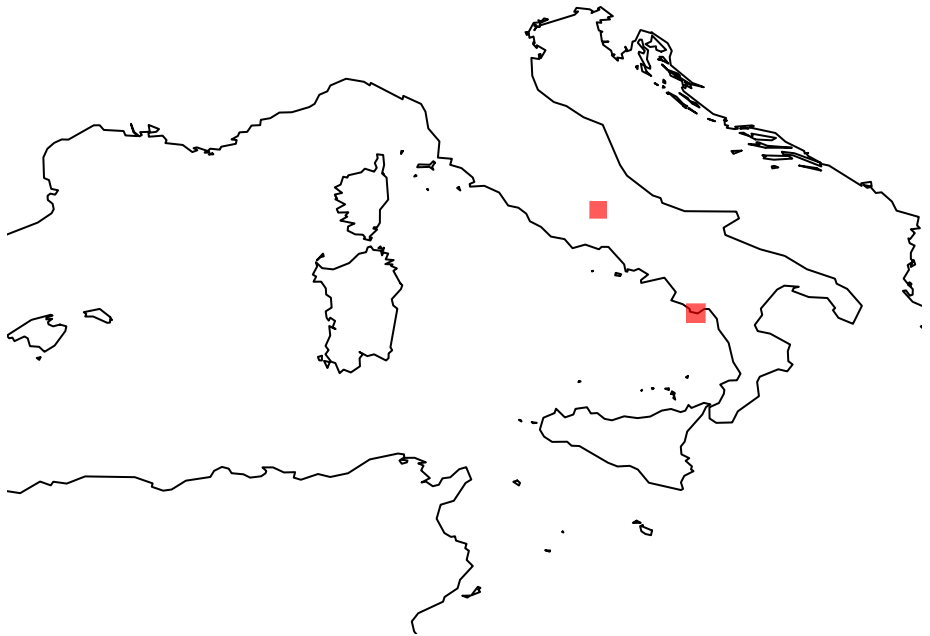



8965 cal. BC

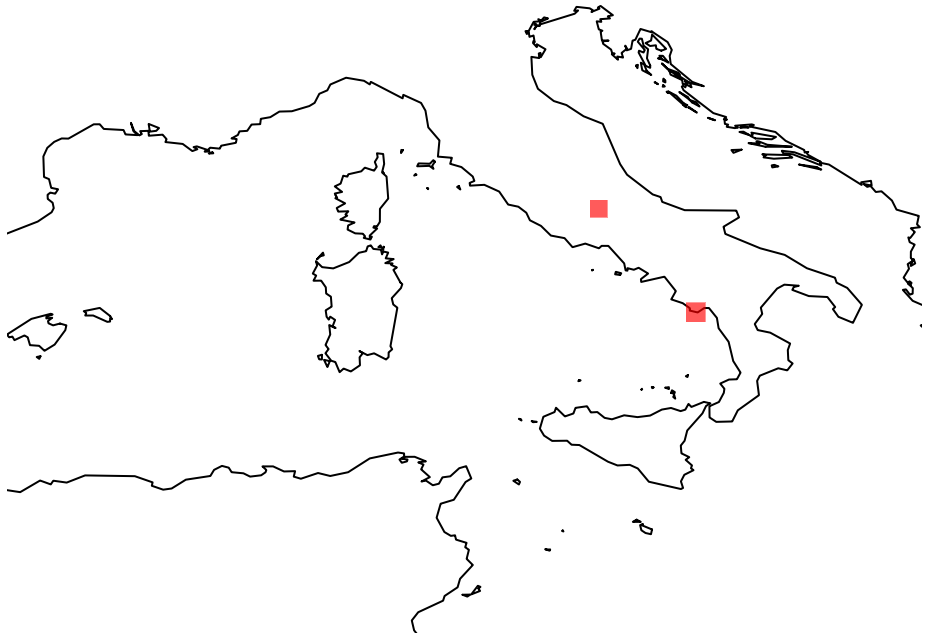

8960 cal. BC

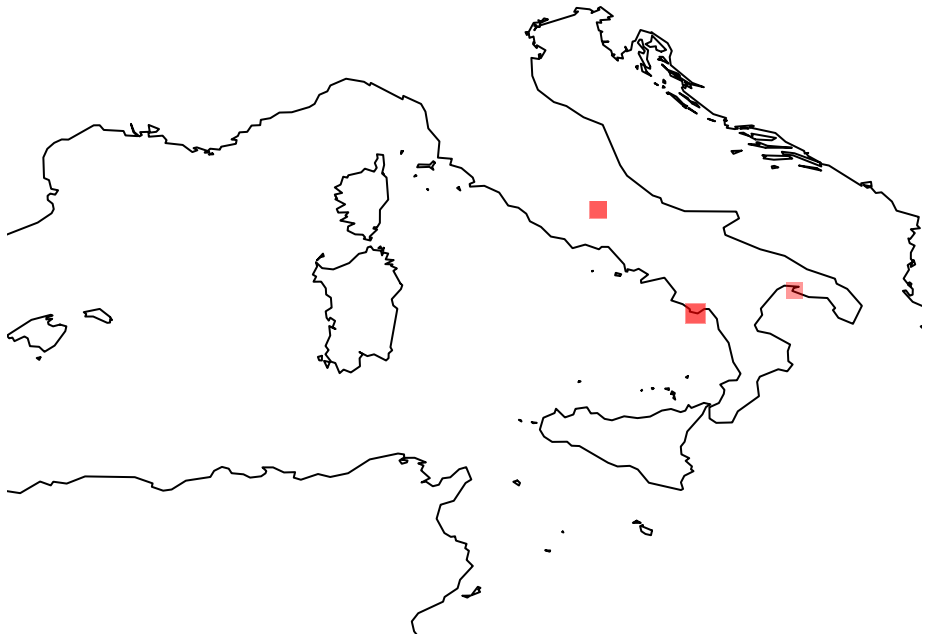

8955 cal. BC

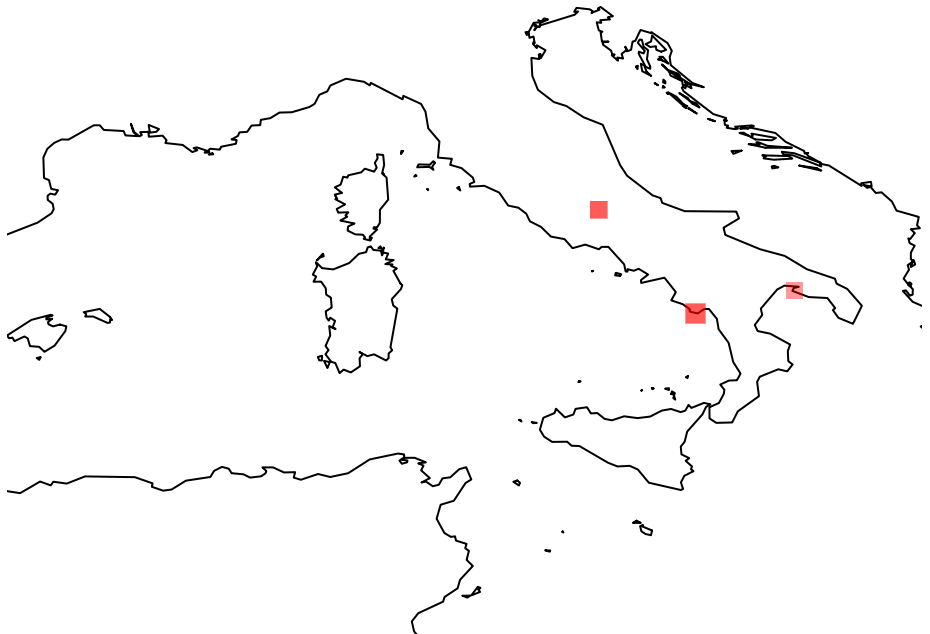

8950 cal. BC

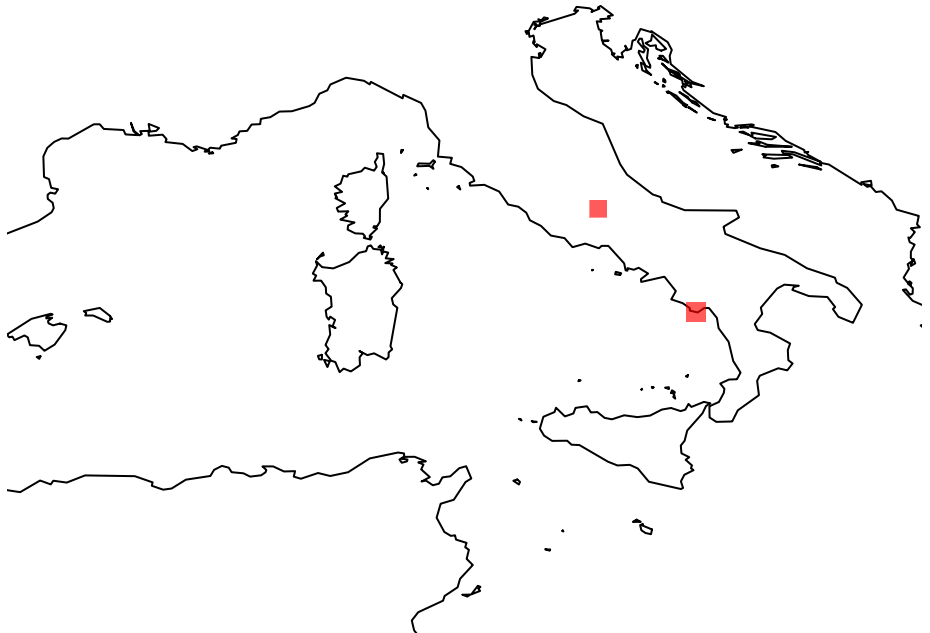

8945 cal. BC

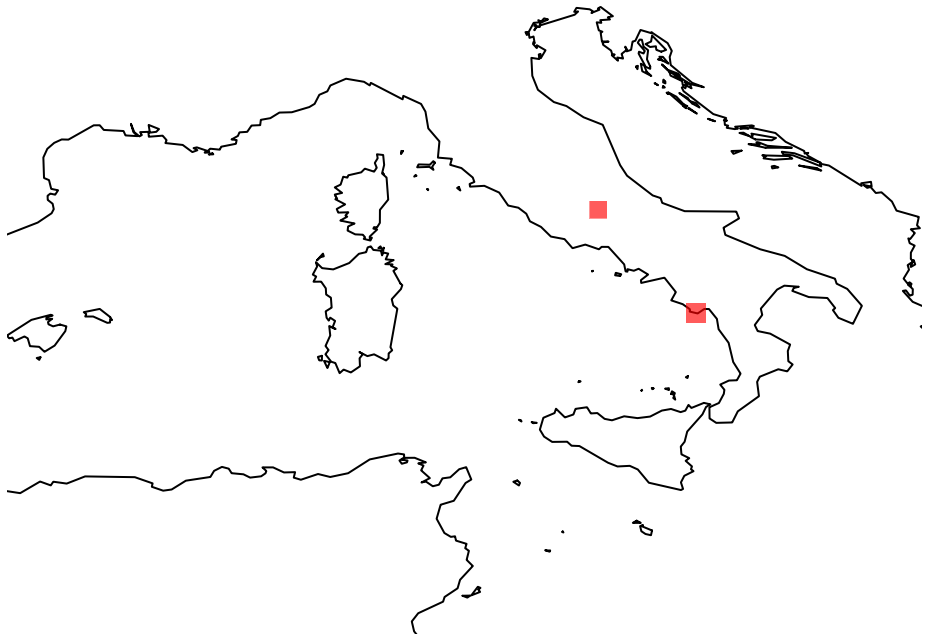

8940 cal. BC

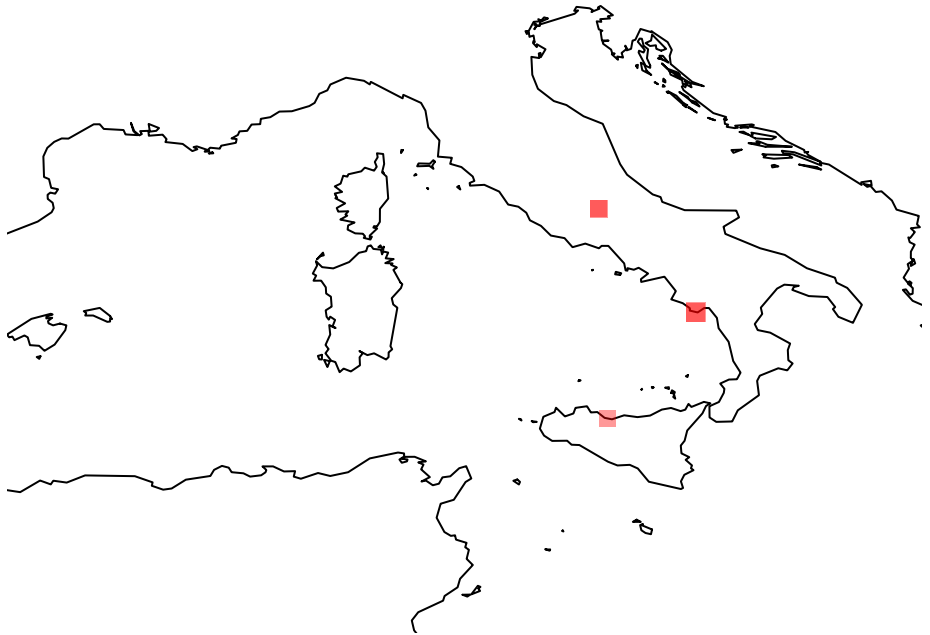

8935 cal. BC

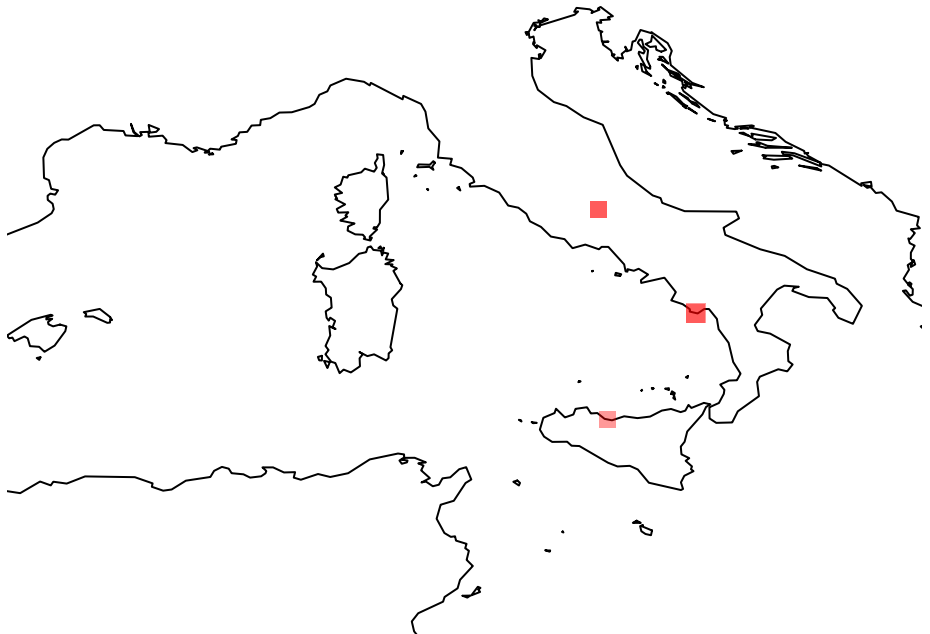

8930 cal. BC





8925 cal. BC

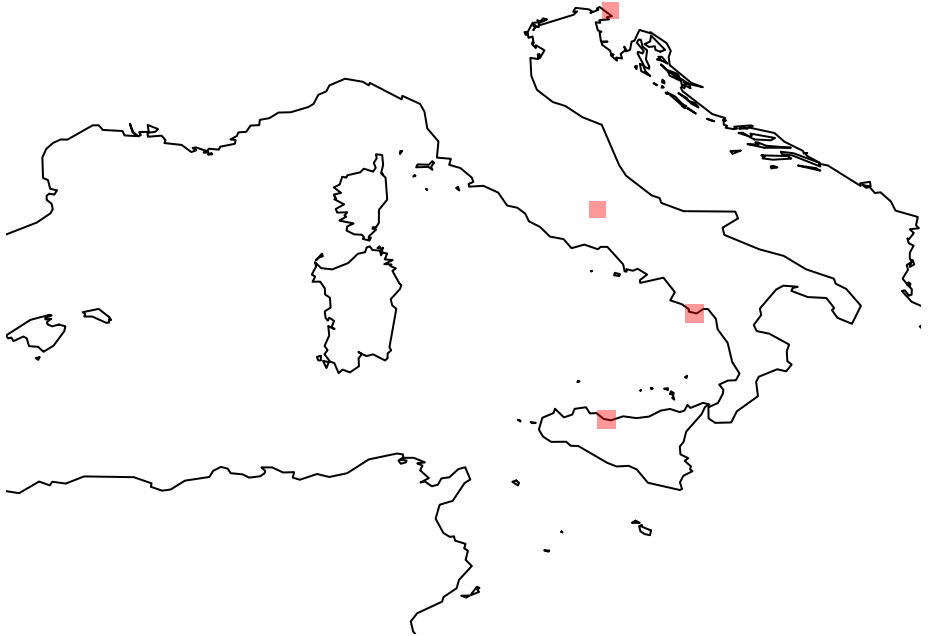

8920 cal. BC



8915 cal. BC

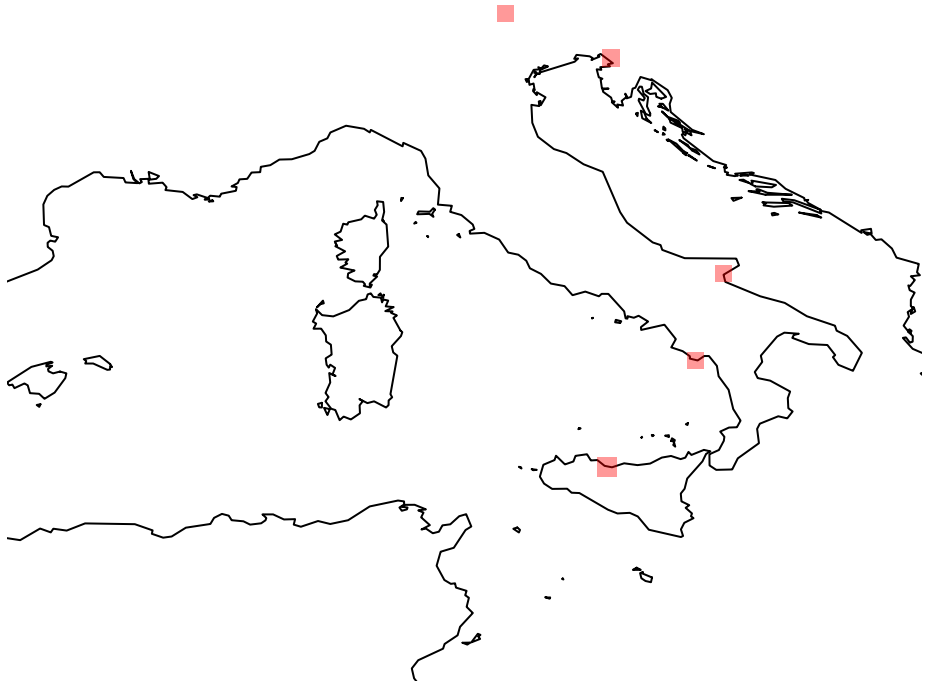

8910 cal. BC



8905 cal. BC



8900 cal. BC

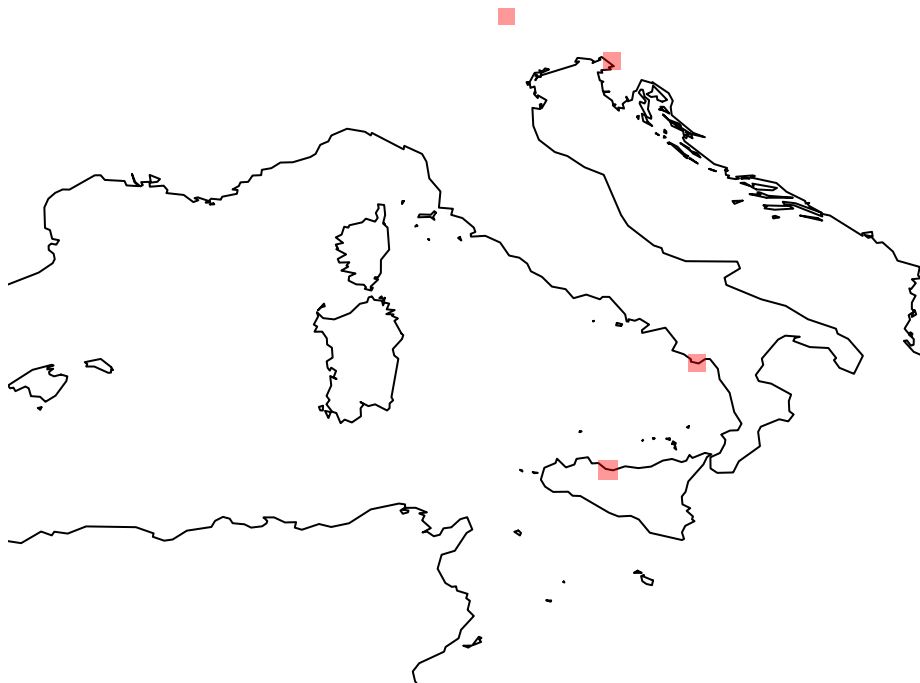

8895 cal. BC

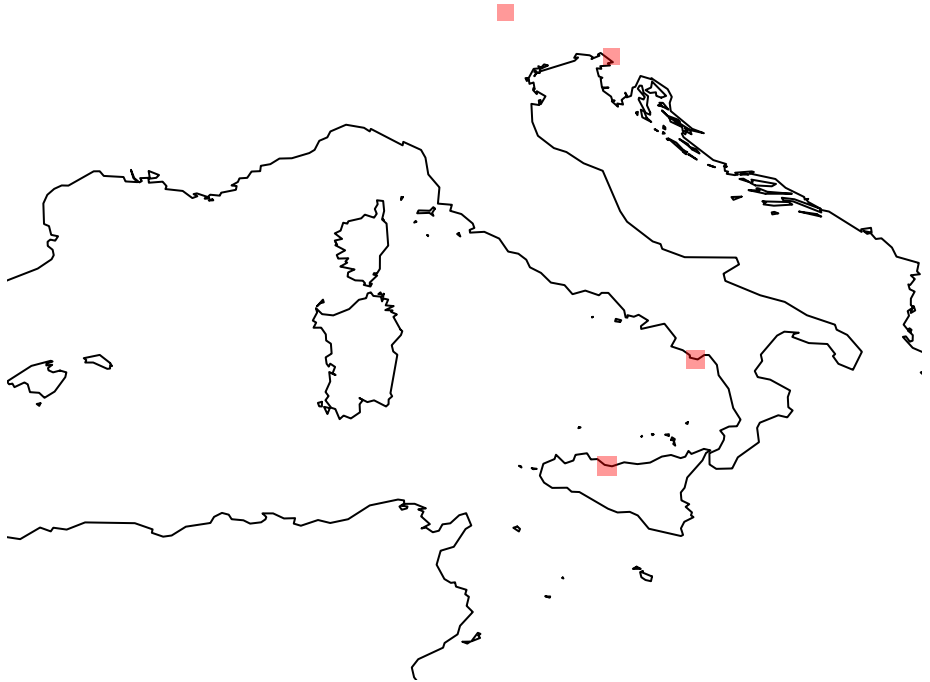

8890 cal. BC

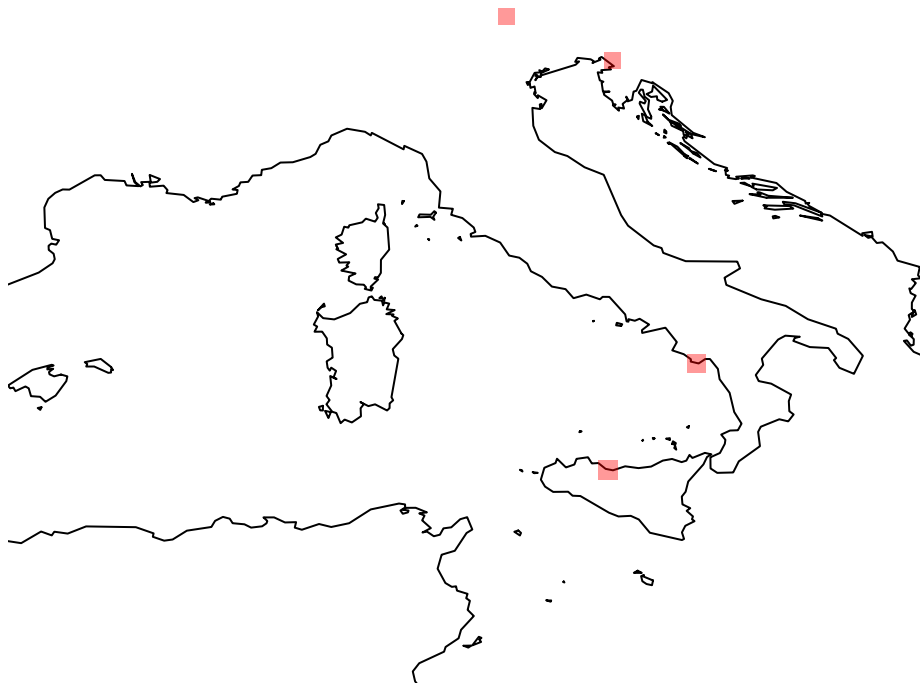



8885 cal. BC

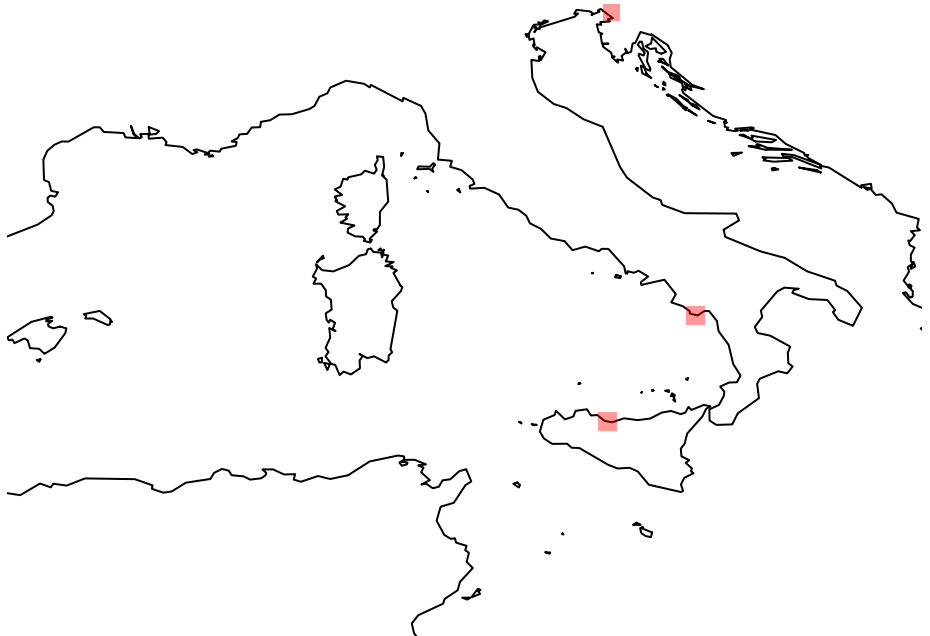

8880 cal. BC



8875 cal. BC

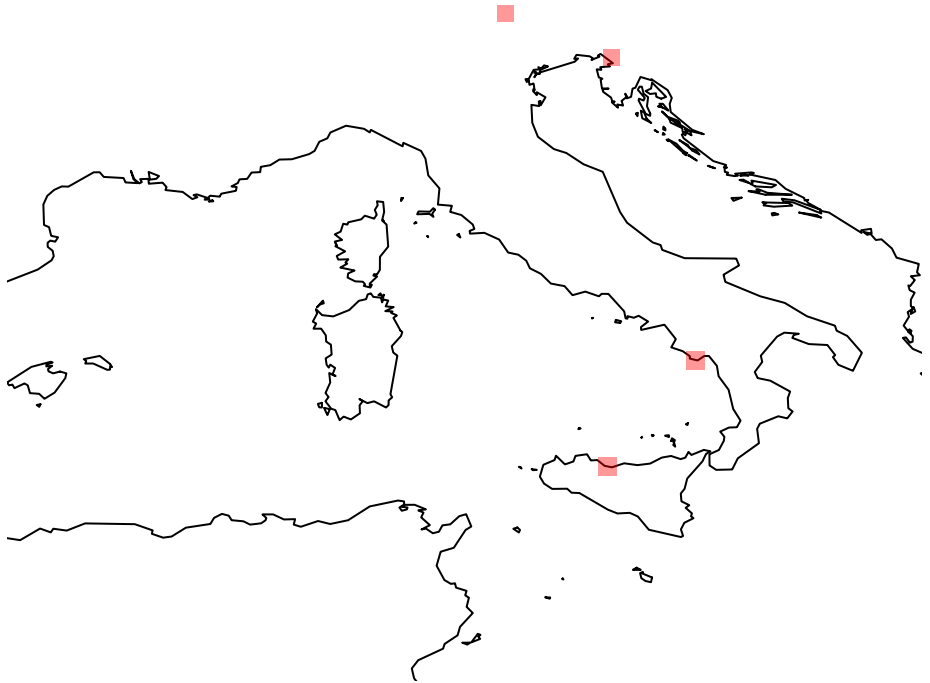

8870 cal. BC



8865 cal. BC



8860 cal. BC



8855 cal. BC

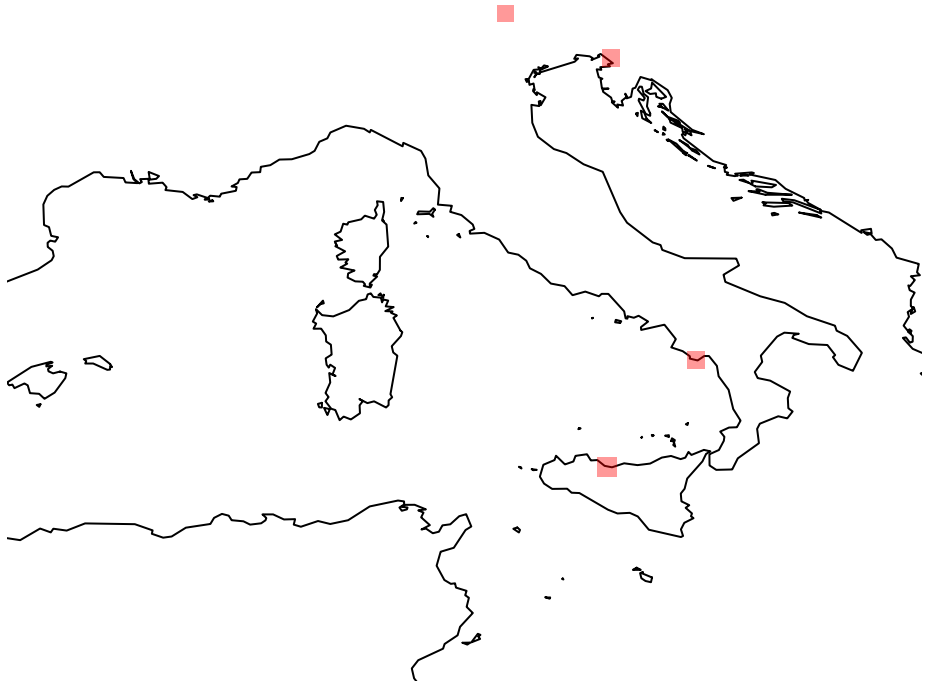

8850 cal. BC





8845 cal. BC

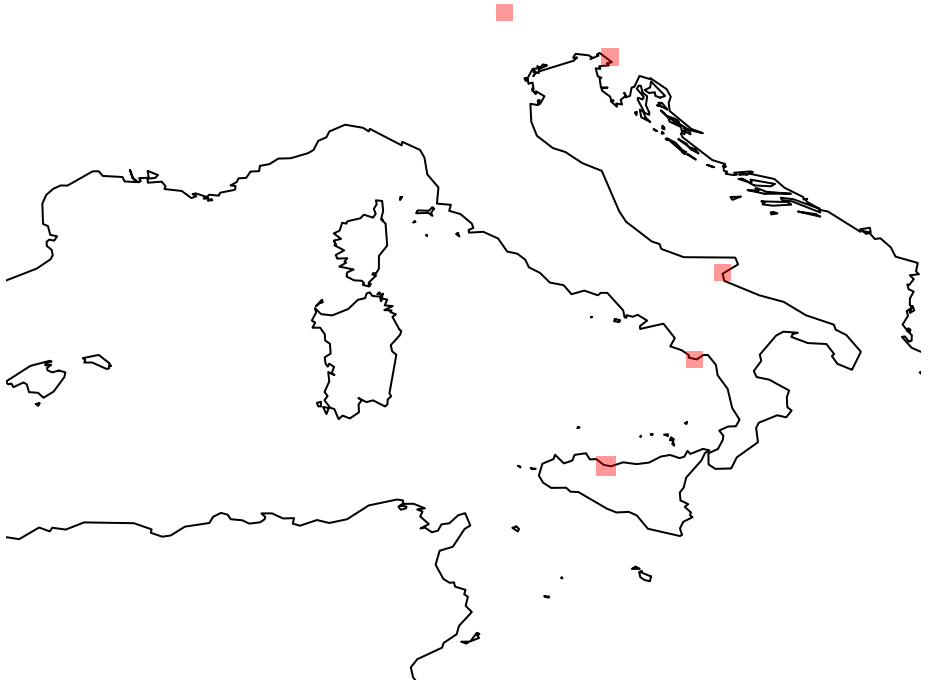

8840 cal. BC

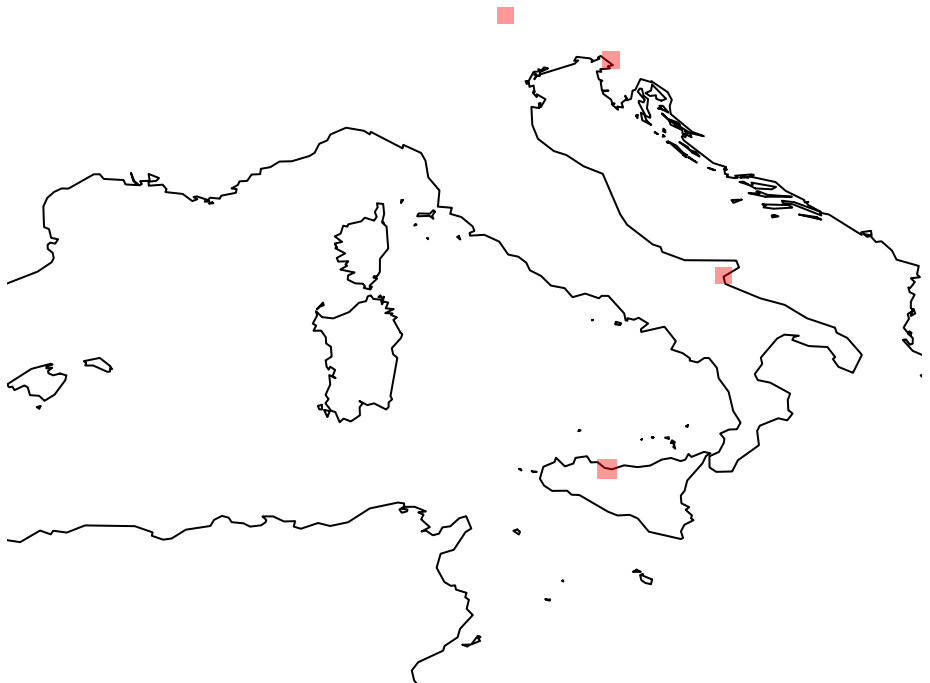

8835 cal. BC



8830 cal. BC



8825 cal. BC



8820 cal. BC

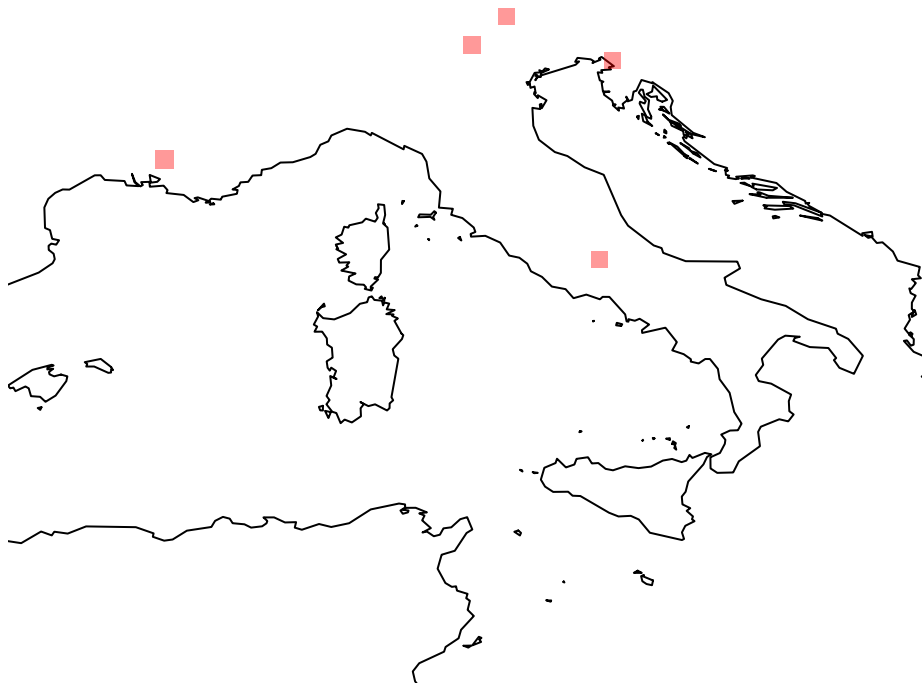

8815 cal. BC

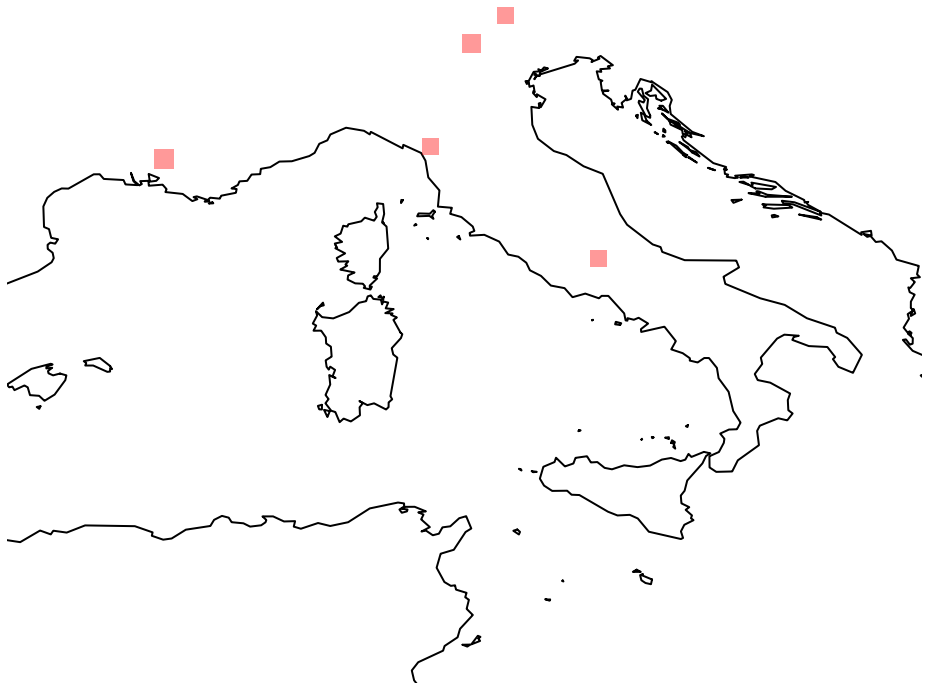

8810 cal. BC

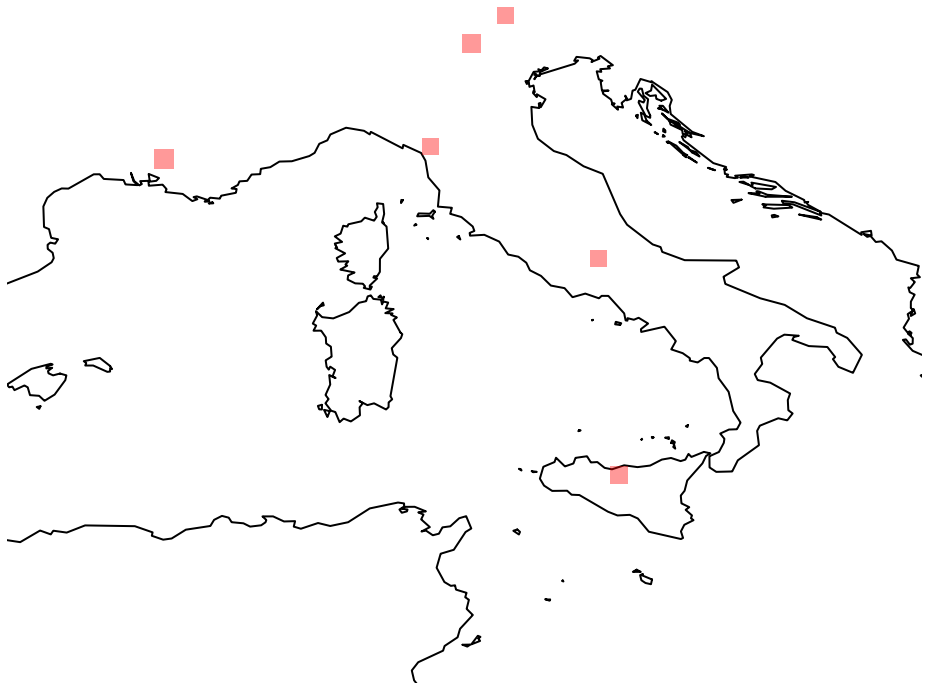



8805 cal. BC

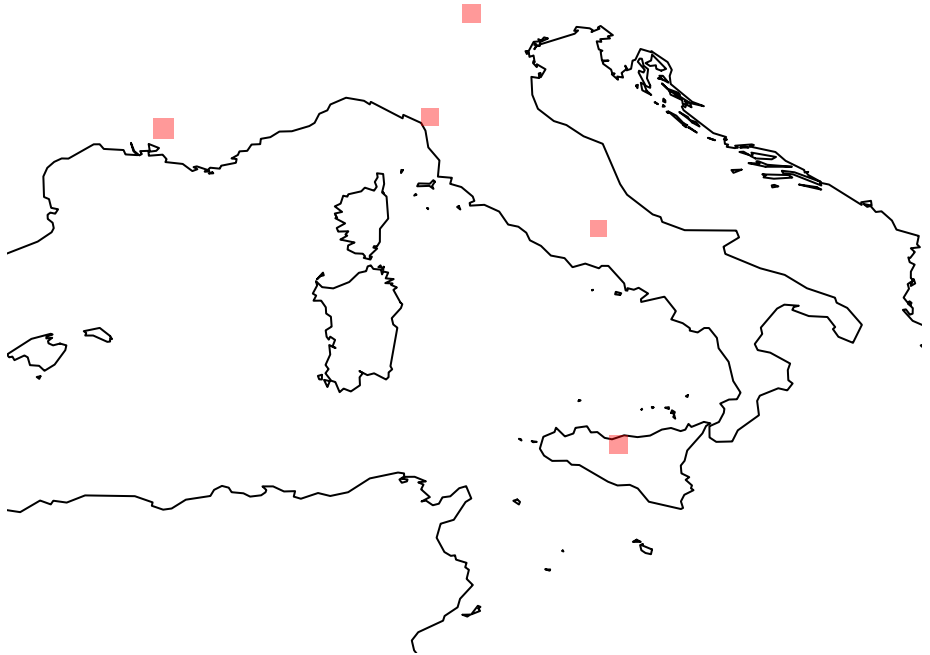

8800 cal. BC

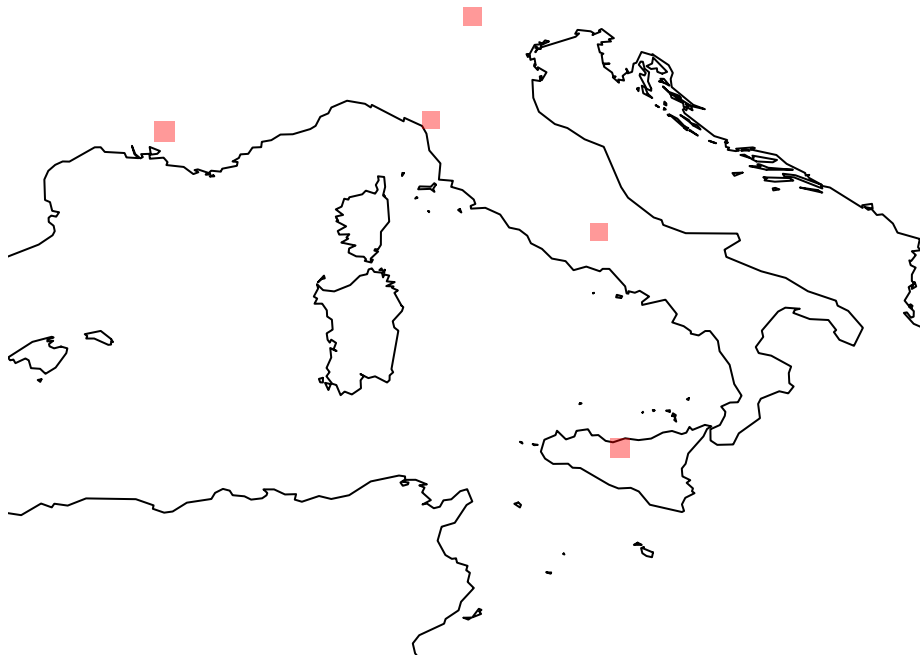

8795 cal. BC

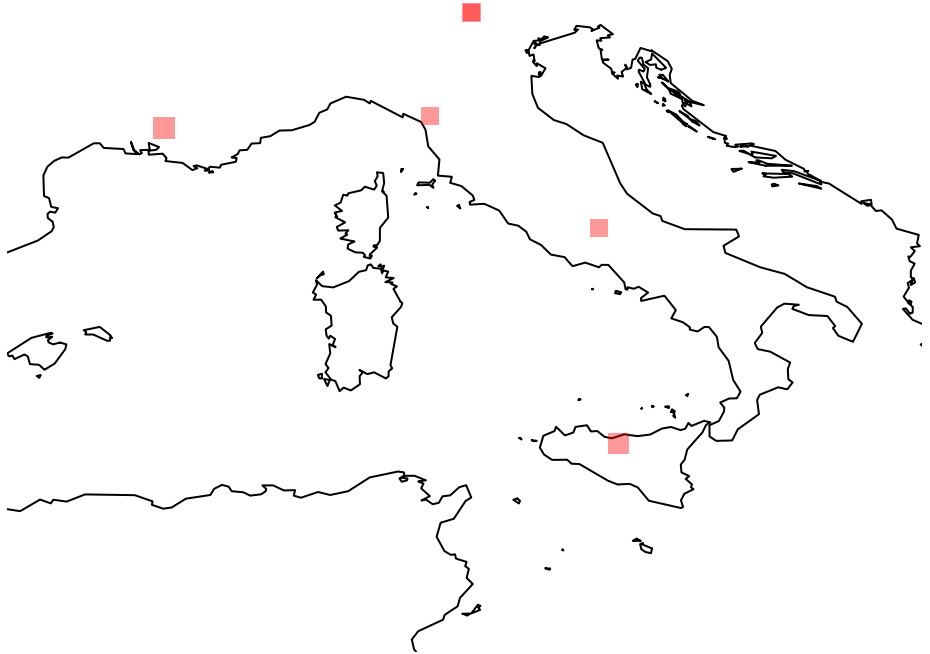

8790 cal. BC

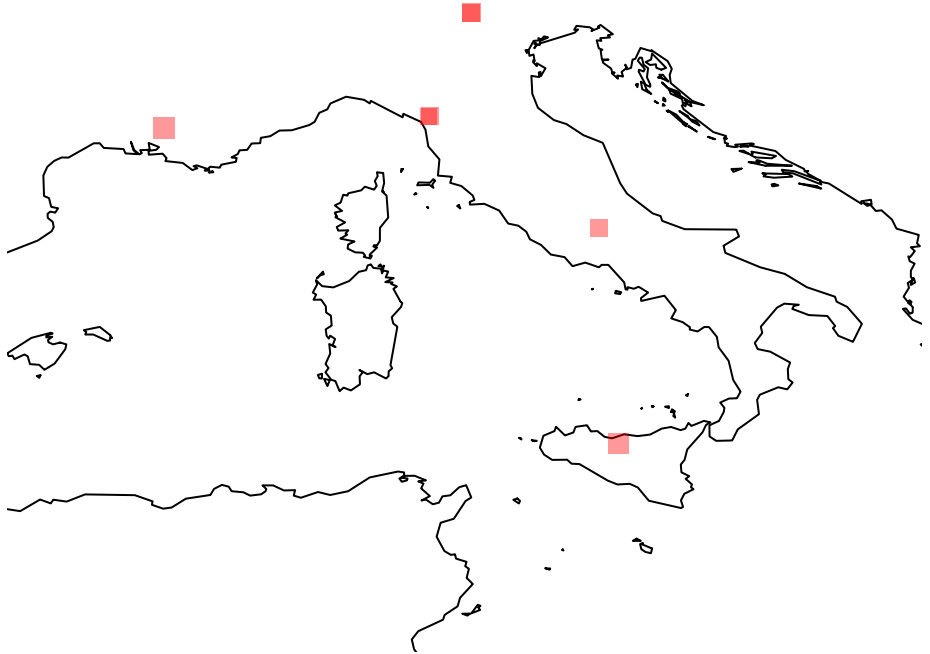

8785 cal. BC

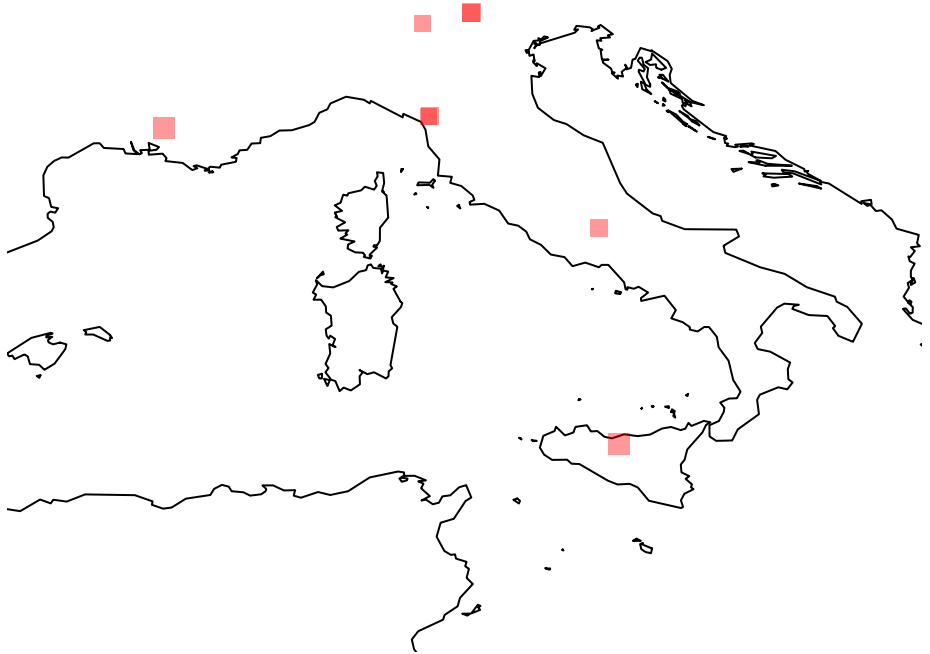

8780 cal. BC

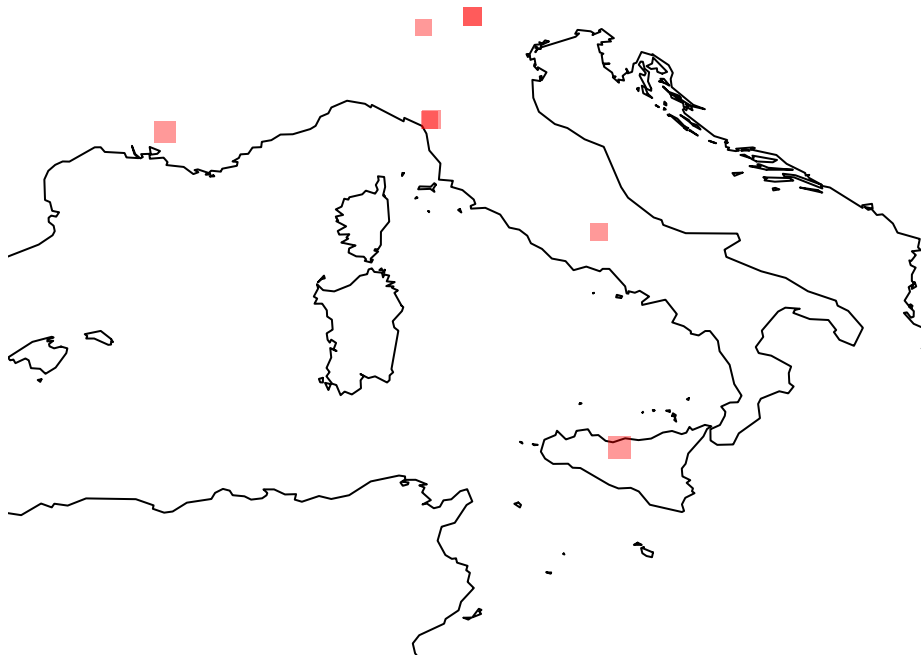

8775 cal. BC

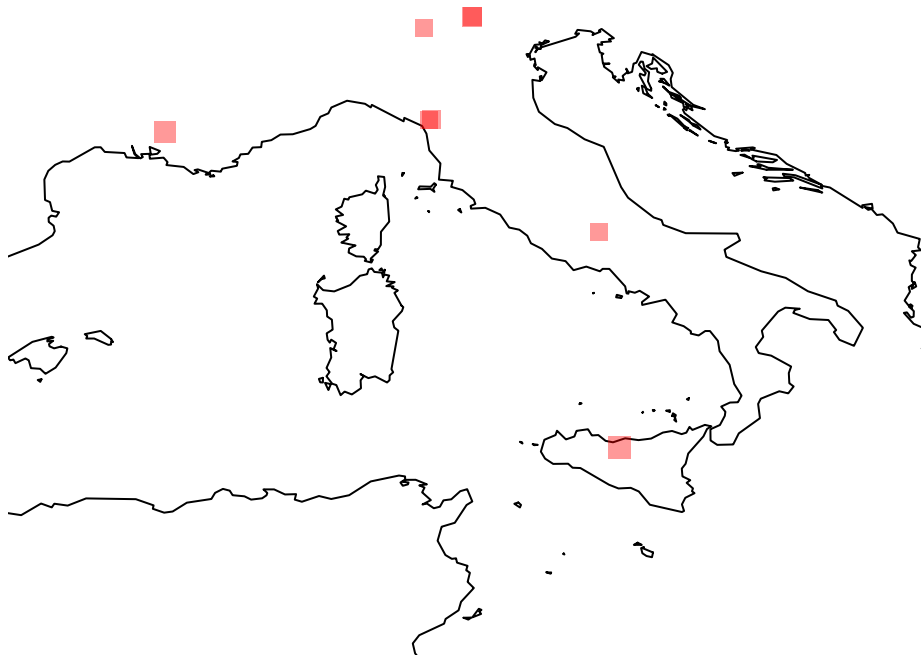

8770 cal. BC

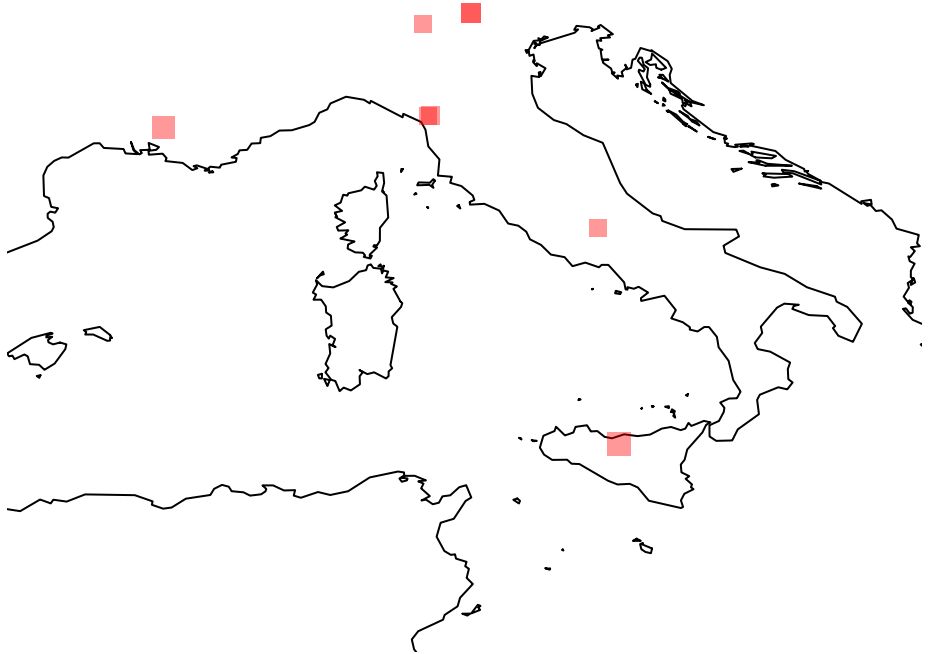



8765 cal. BC

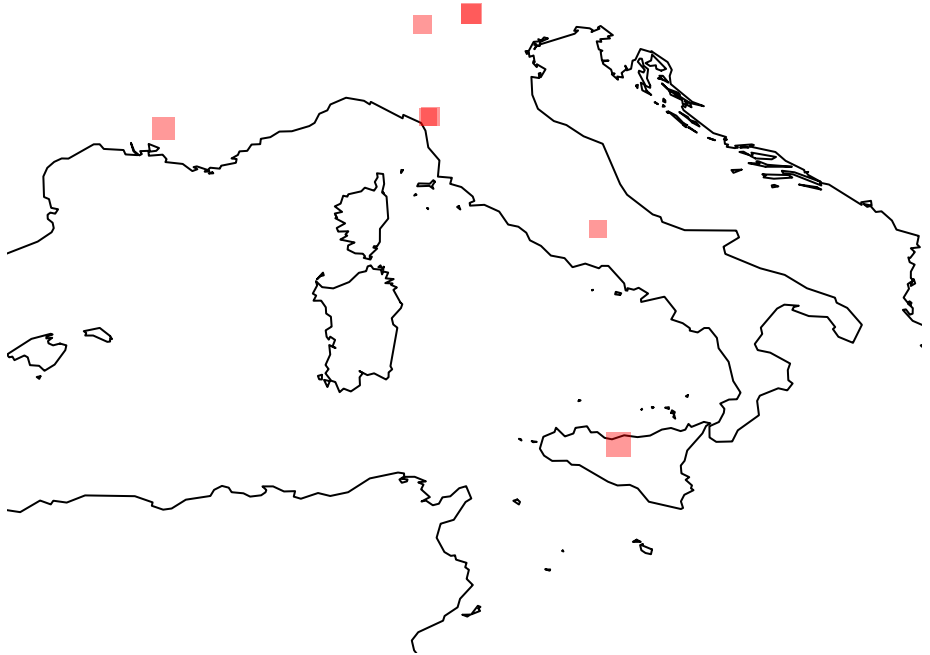

8760 cal. BC

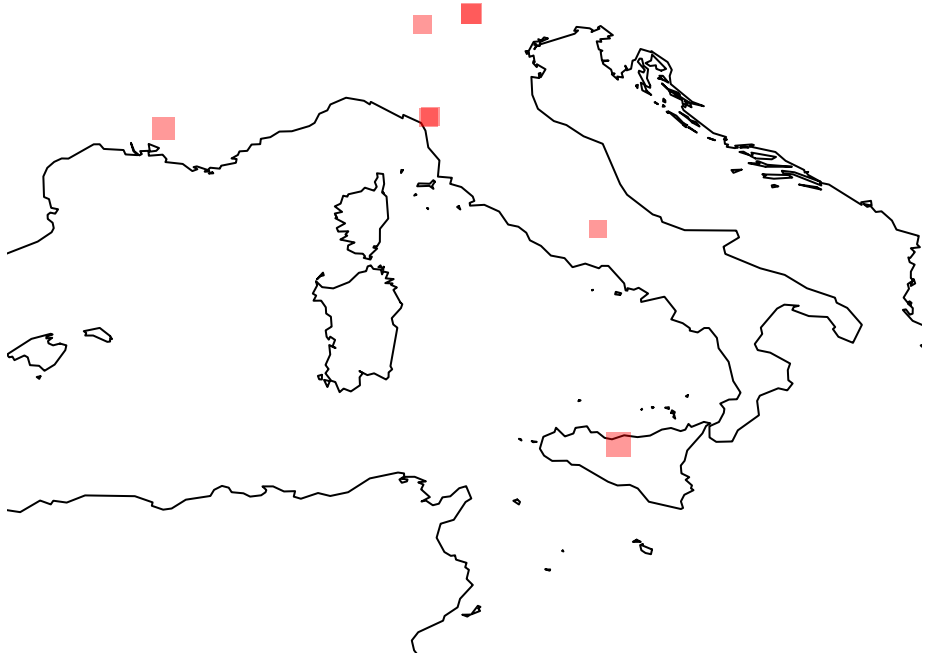

8755 cal. BC

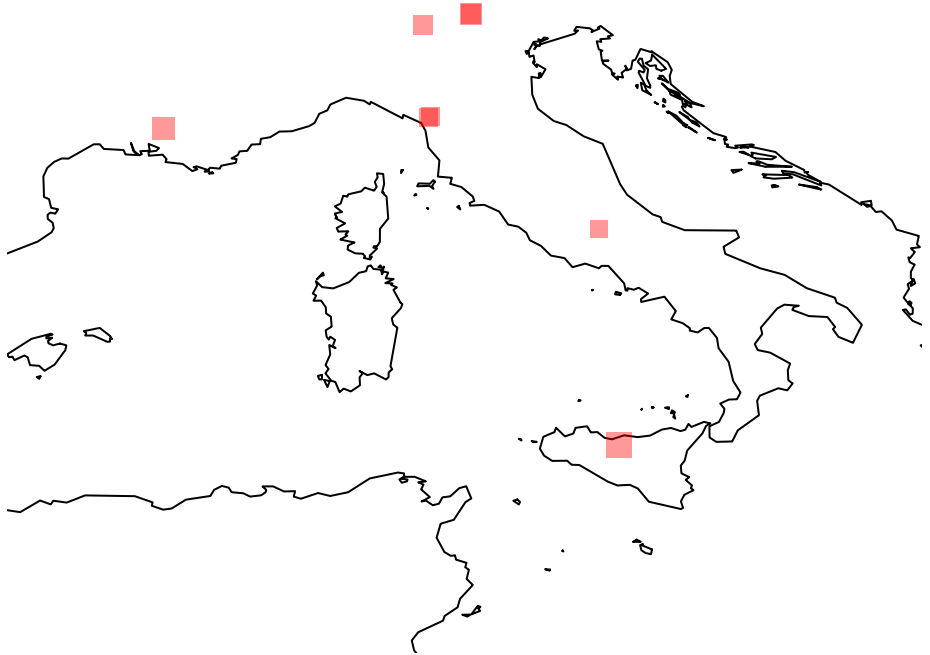

8750 cal. BC

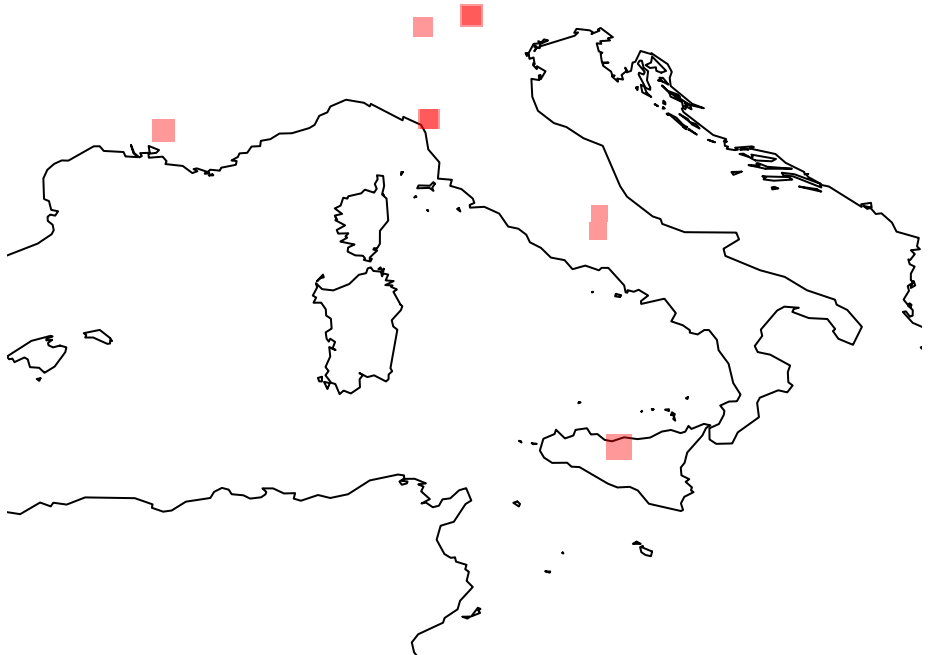

8745 cal. BC

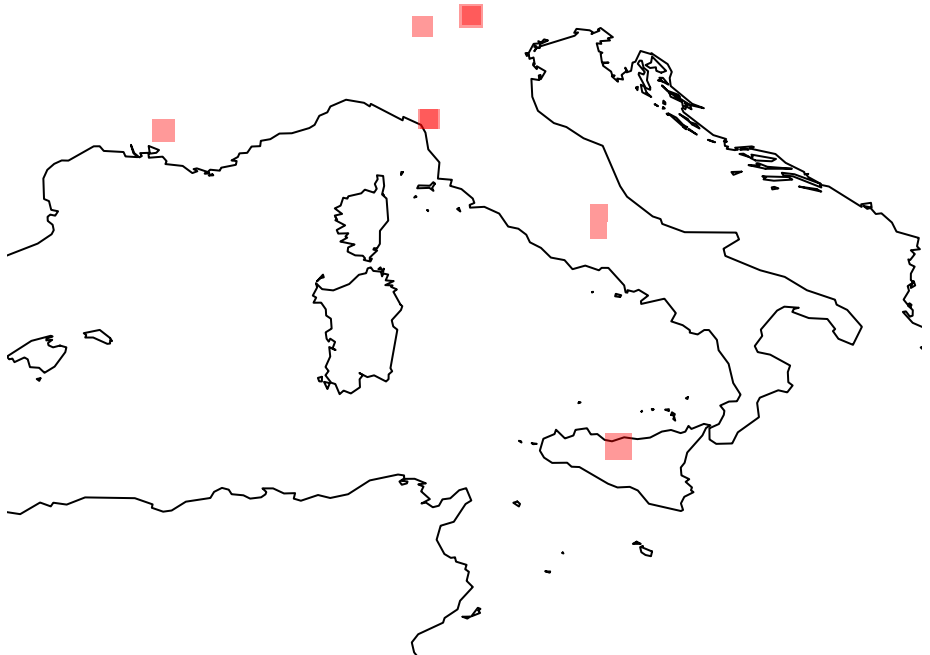

8740 cal. BC

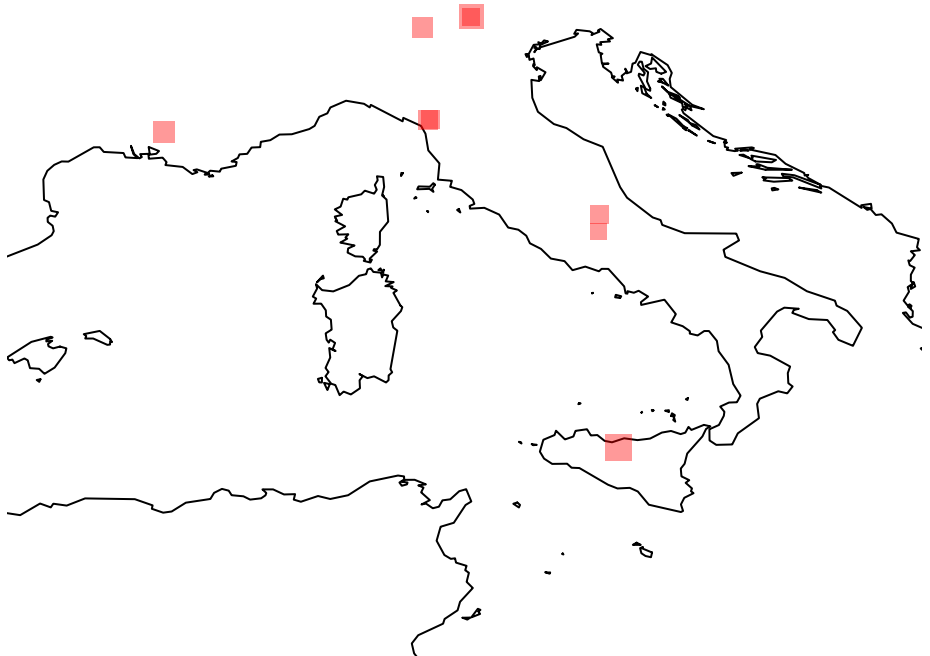

8735 cal. BC

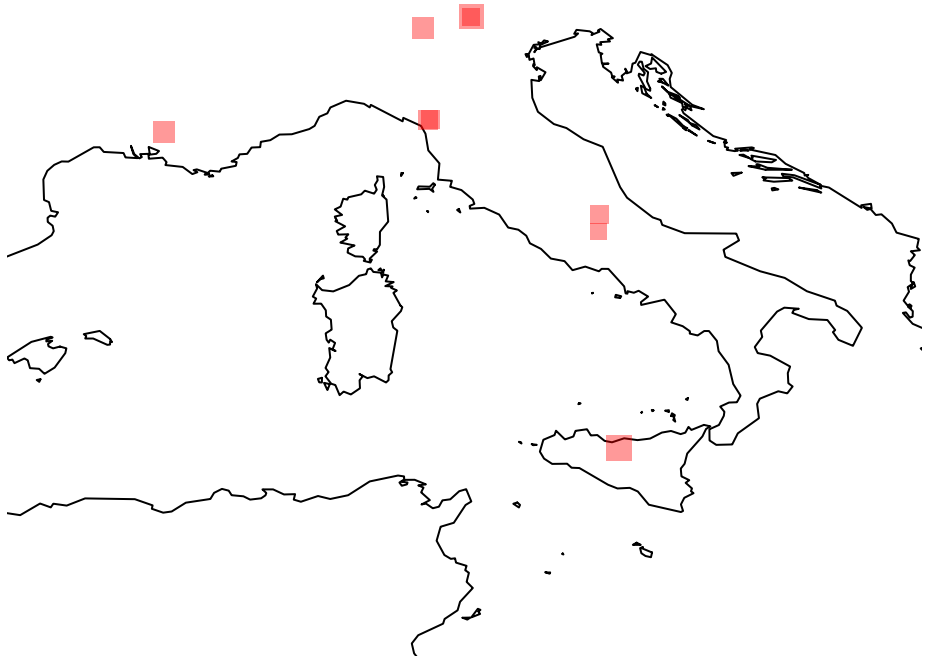

8730 cal. BC

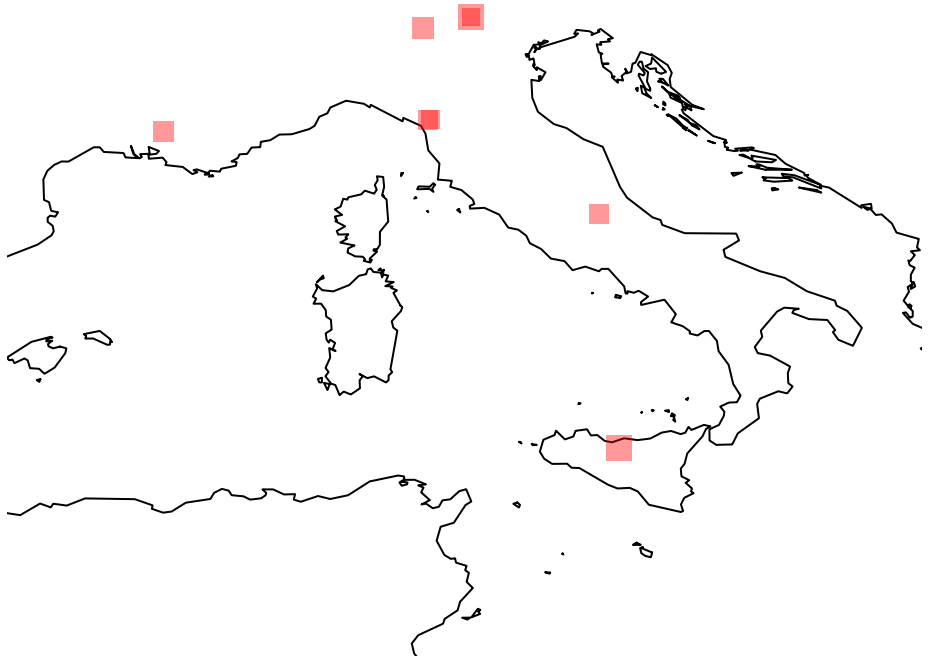



8725 cal. BC

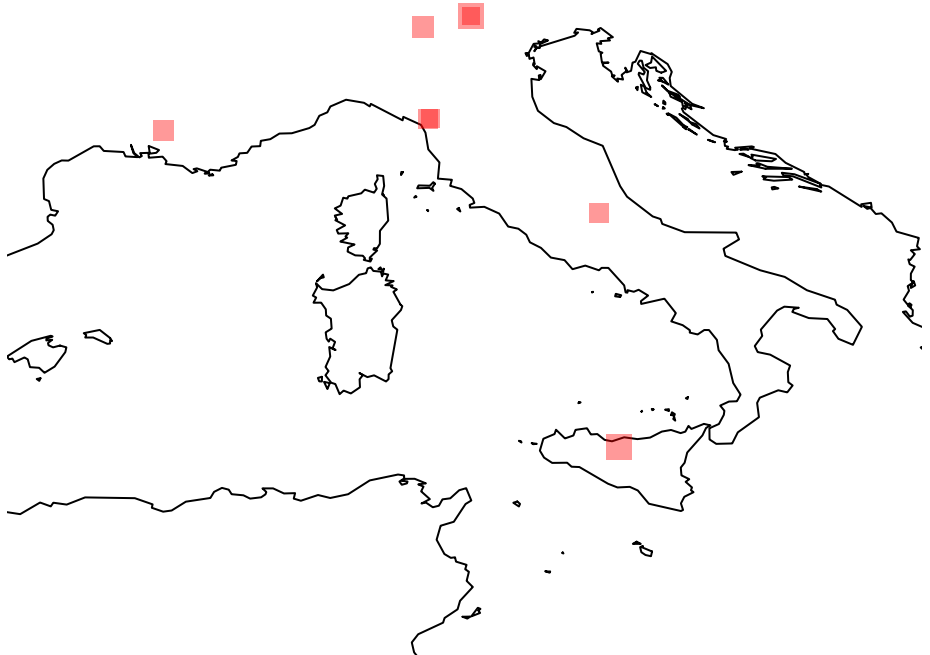

8720 cal. BC

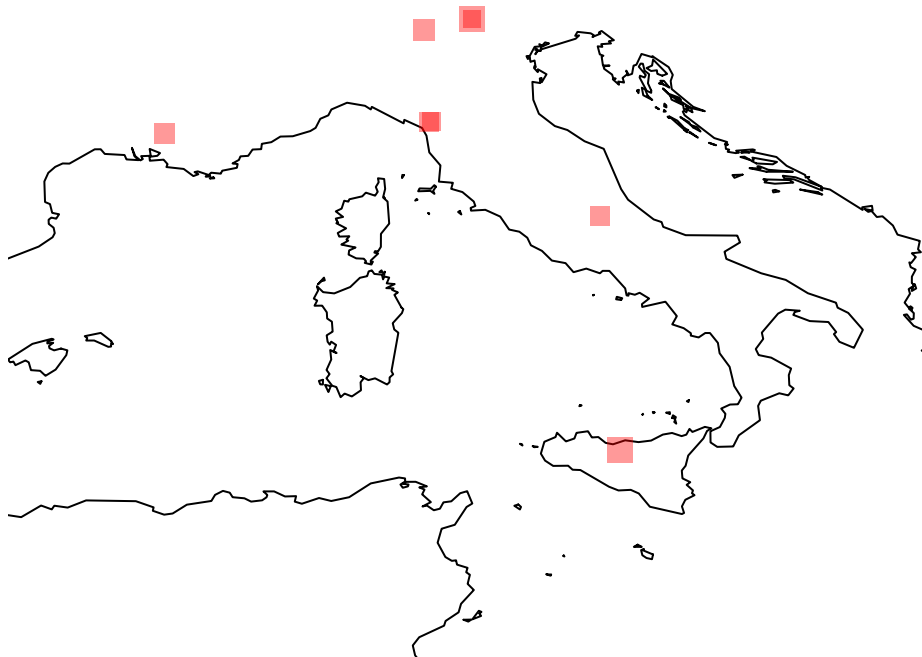

8715 cal. BC



8710 cal. BC

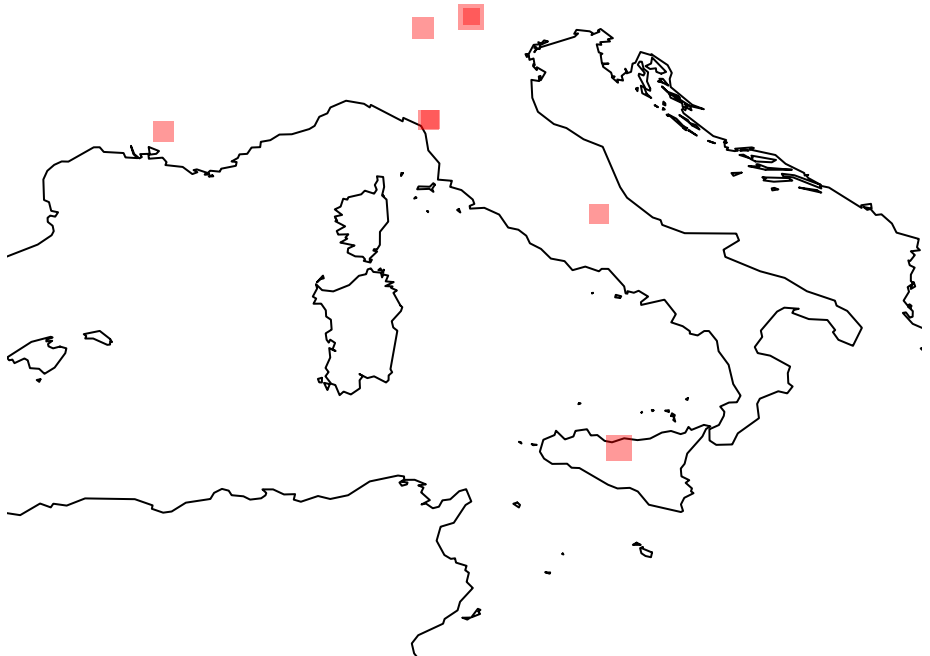

8705 cal. BC

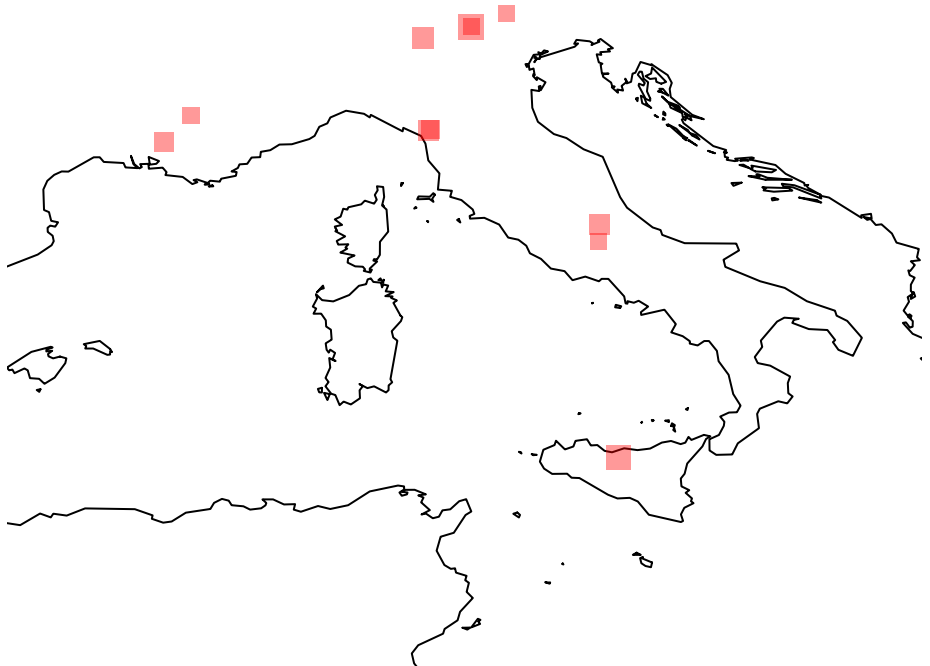

8700 cal. BC

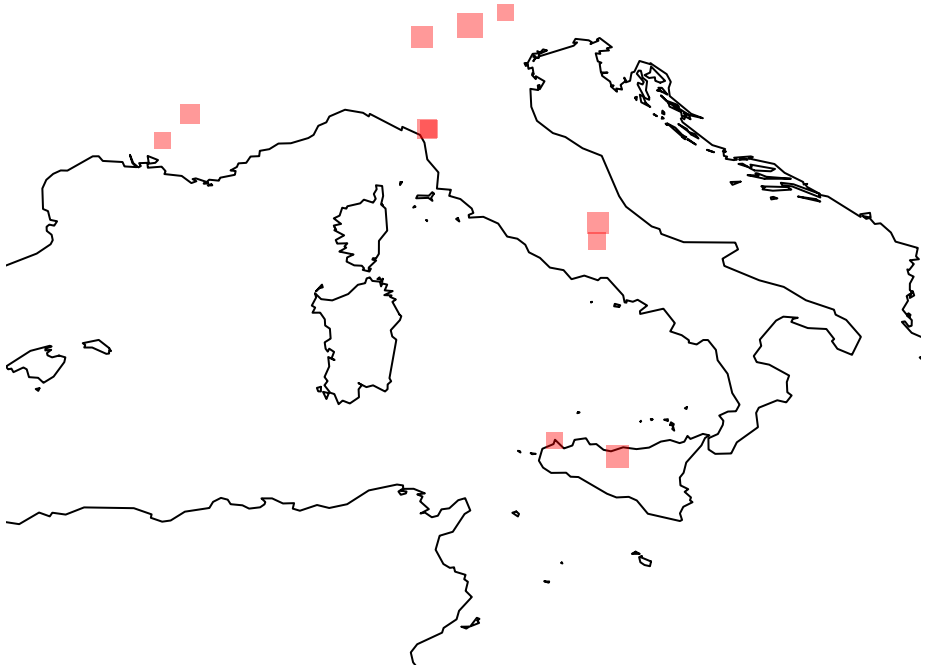

8695 cal. BC

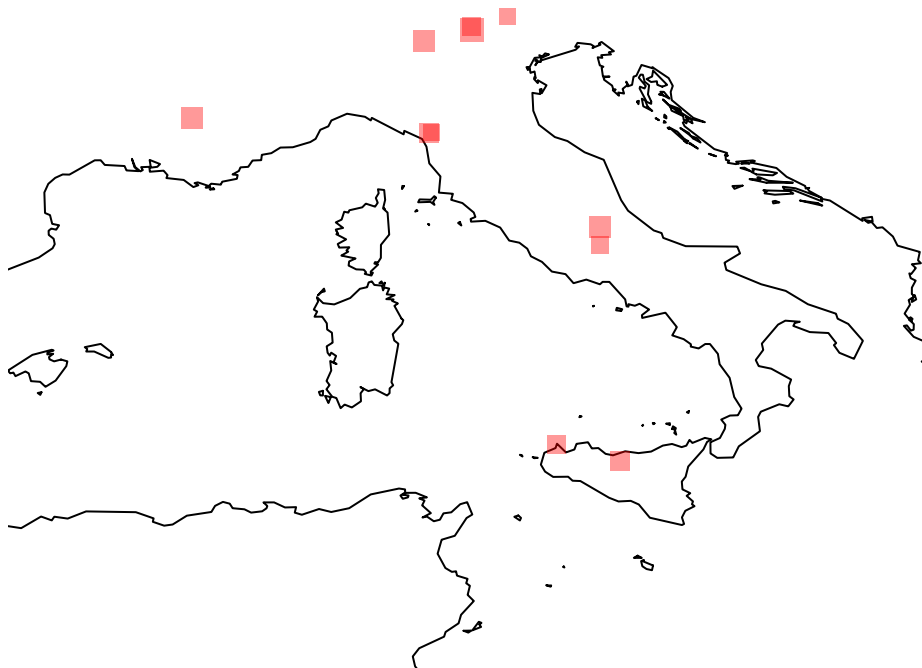

8690 cal. BC

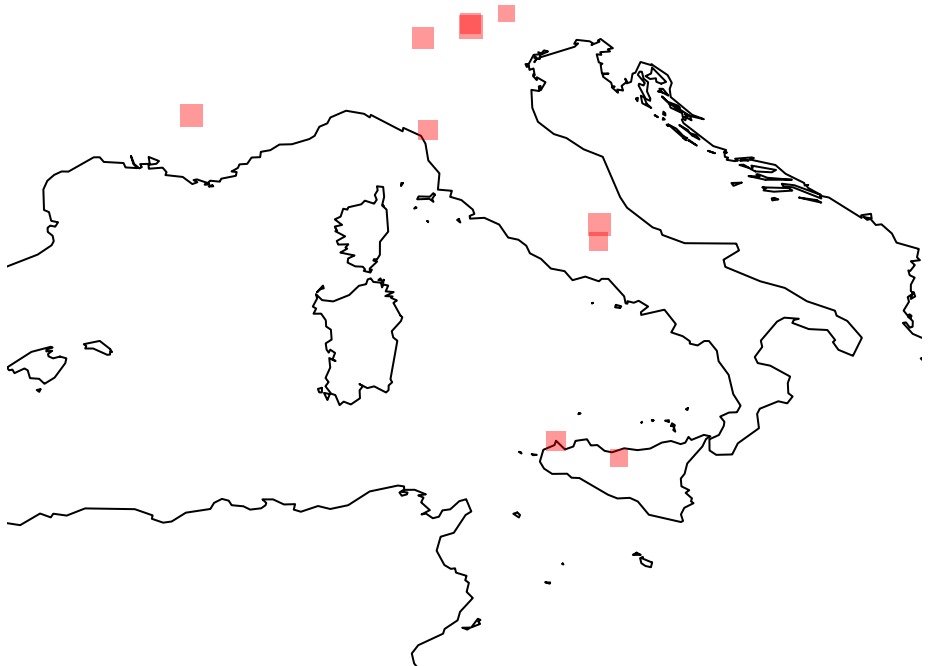



8685 cal. BC

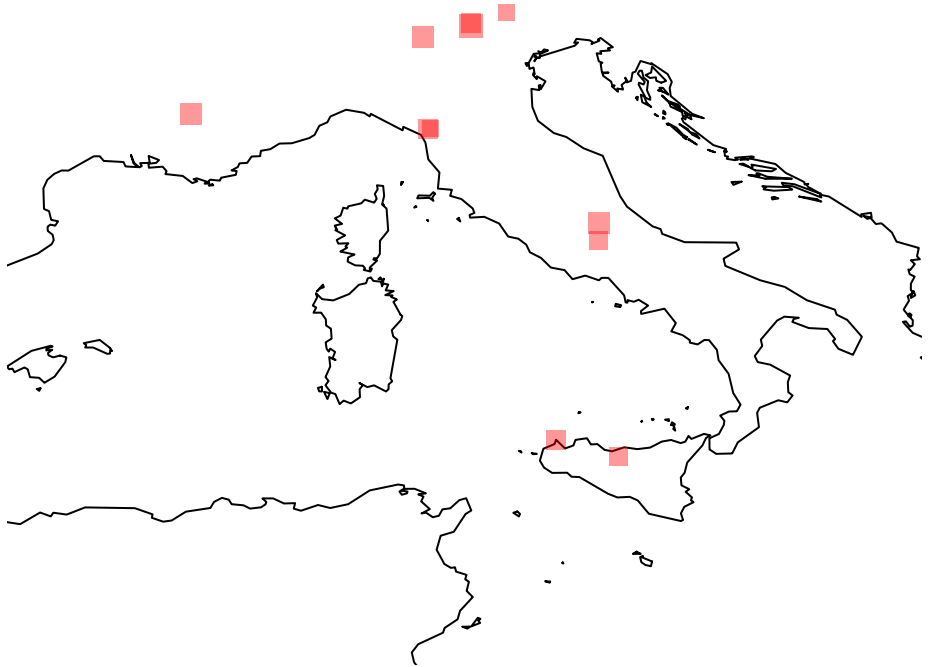

8680 cal. BC

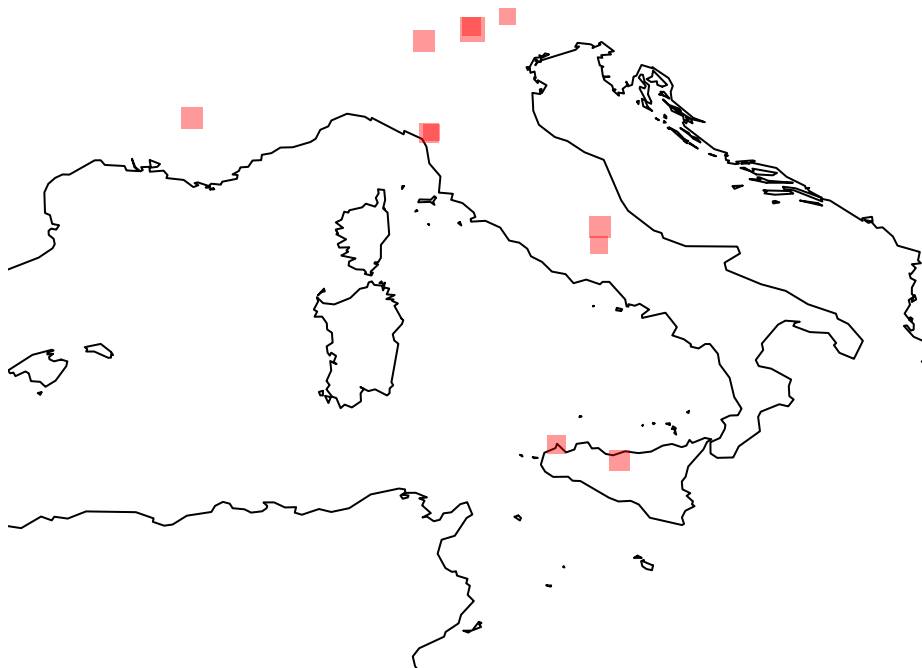

8675 cal. BC

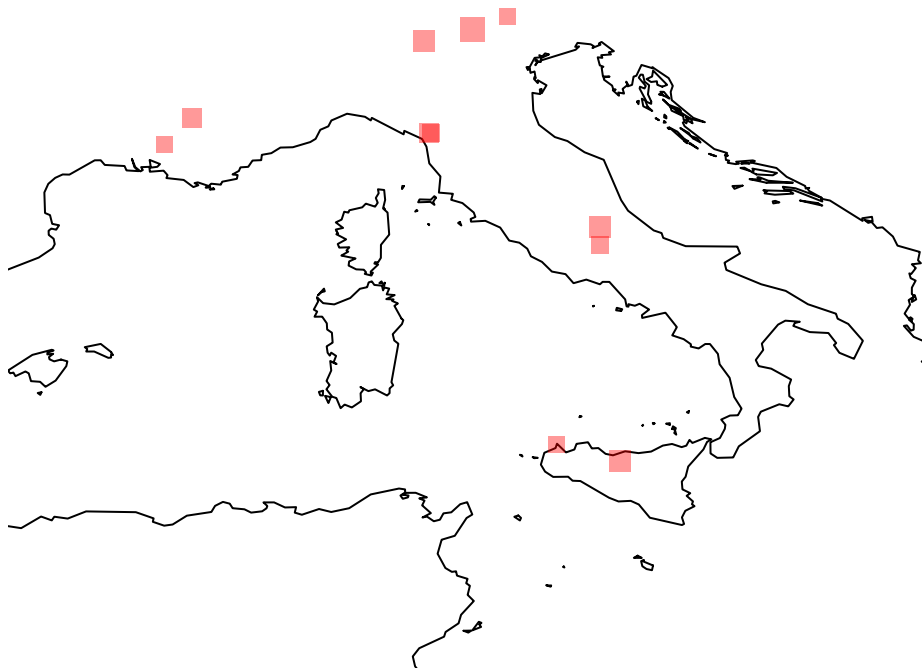

8670 cal. BC

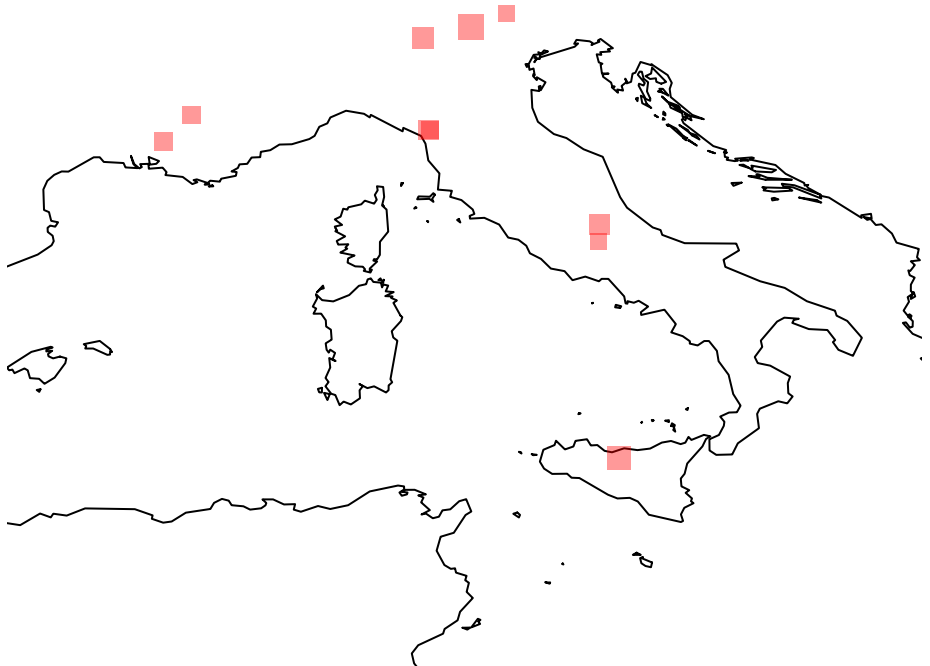

8665 cal. BC

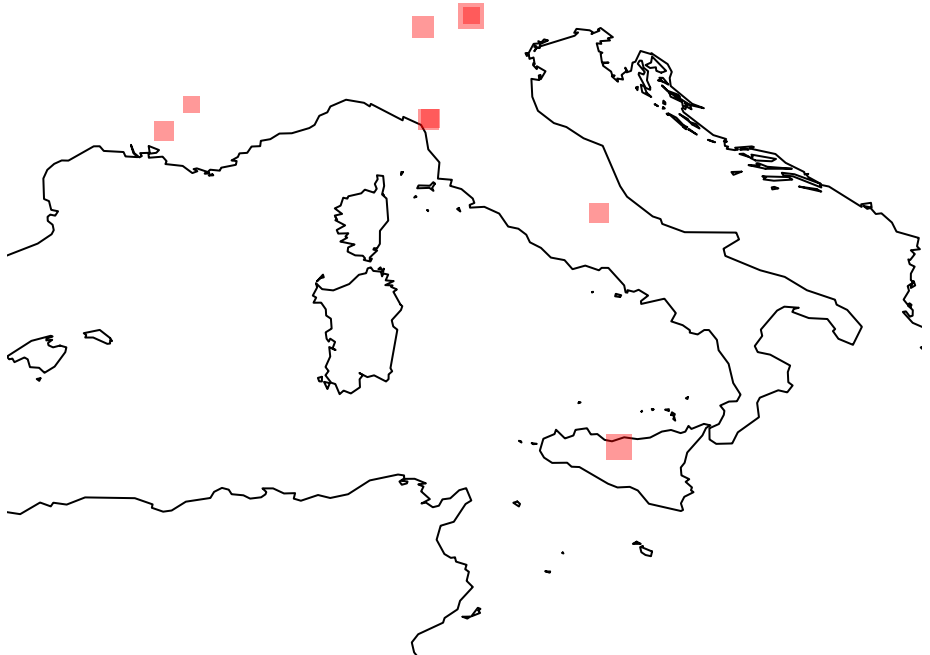

8660 cal. BC

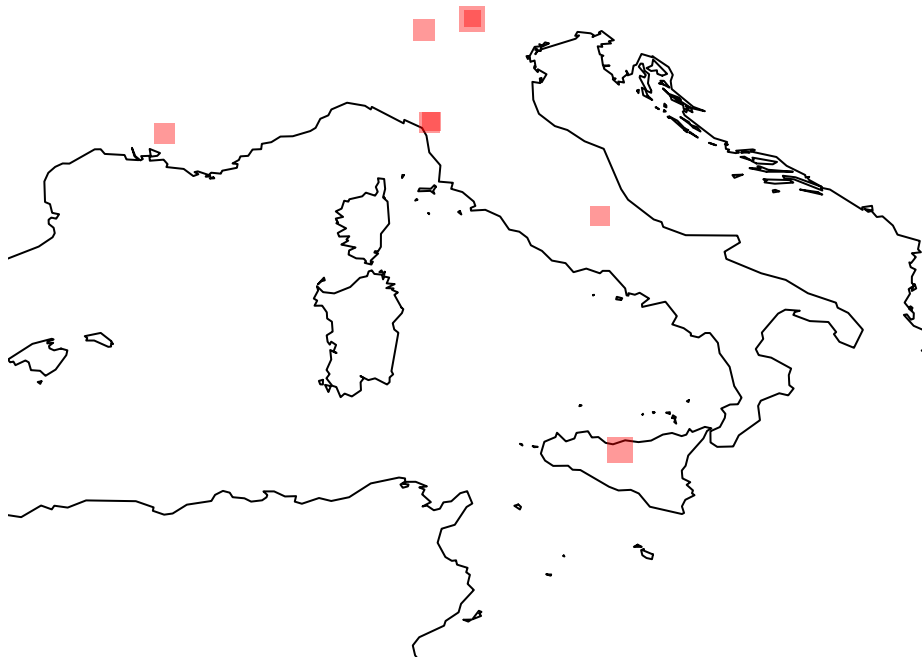

8655 cal. BC

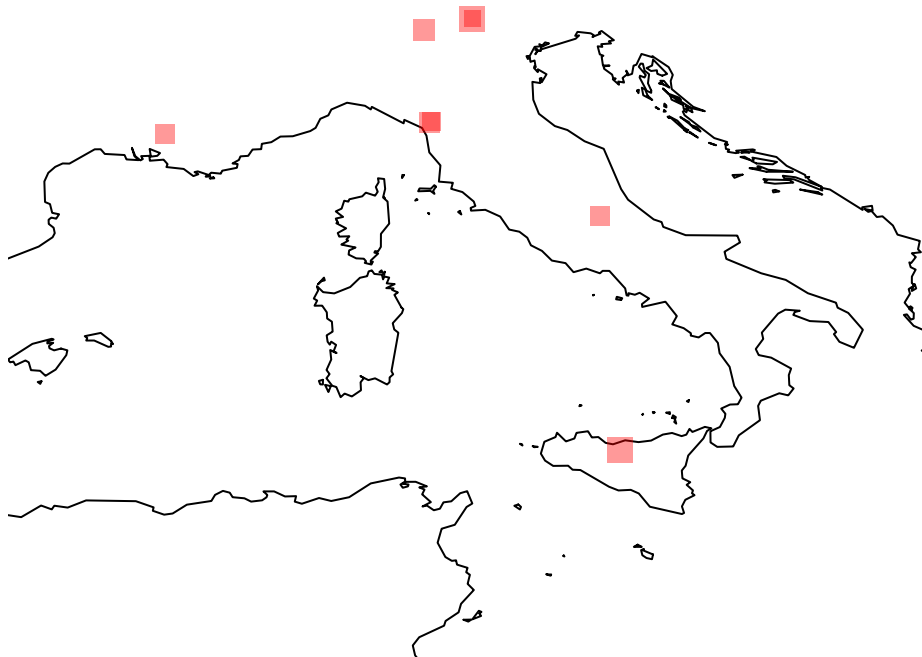

8650 cal. BC

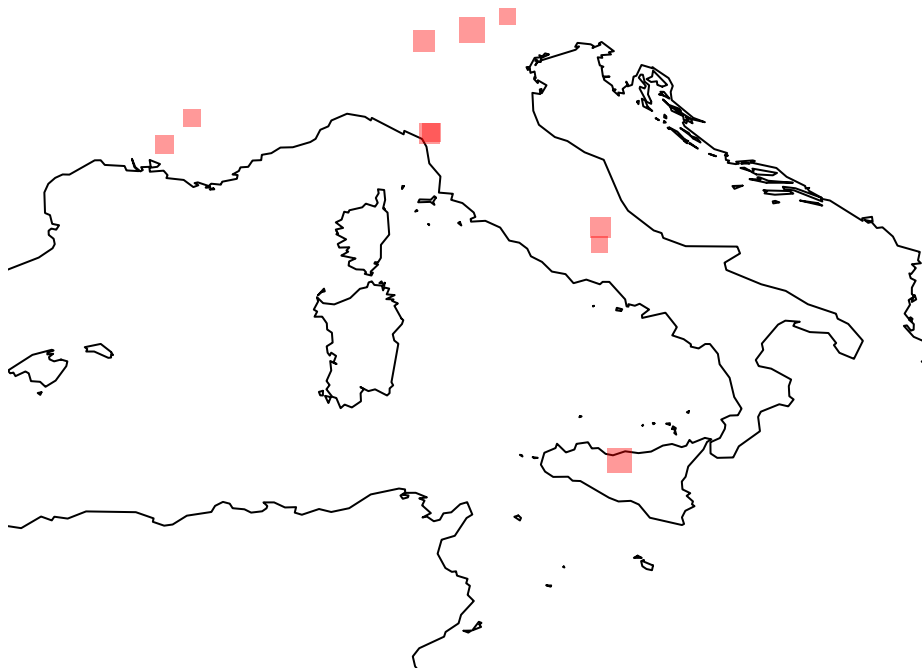



8645 cal. BC

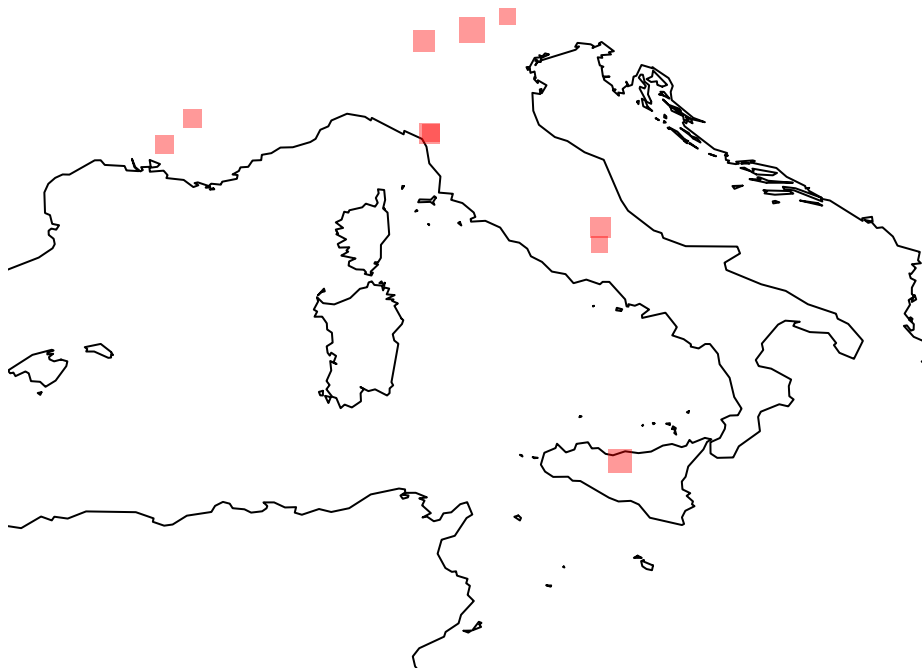

8640 cal. BC

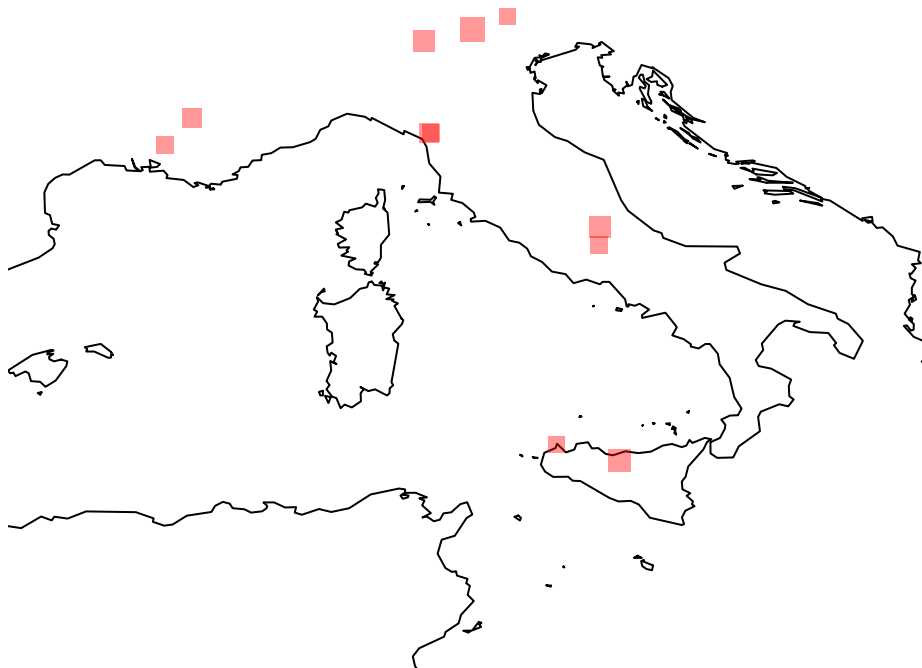

8635 cal. BC

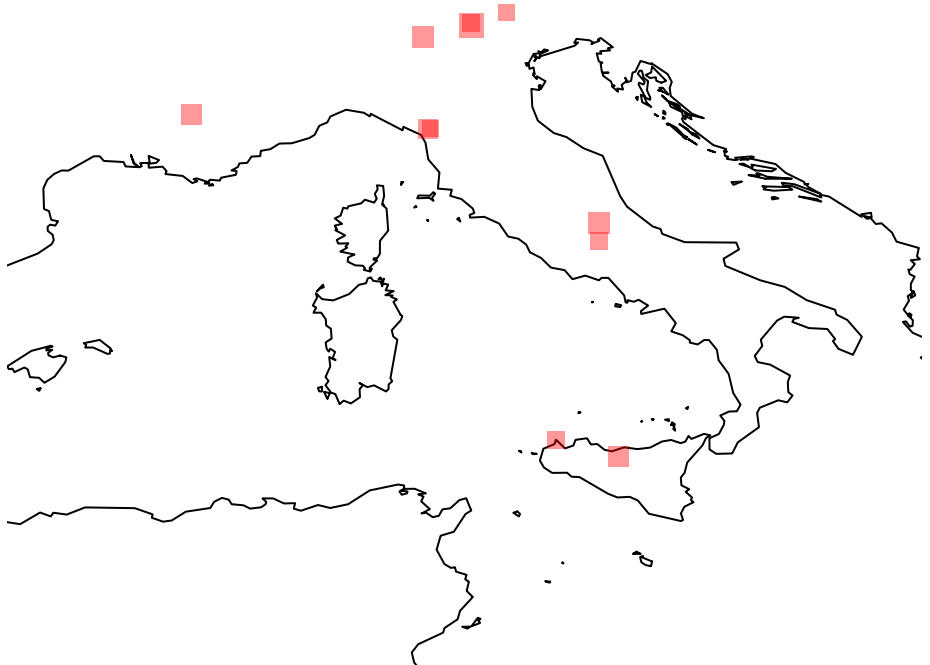

8630 cal. BC

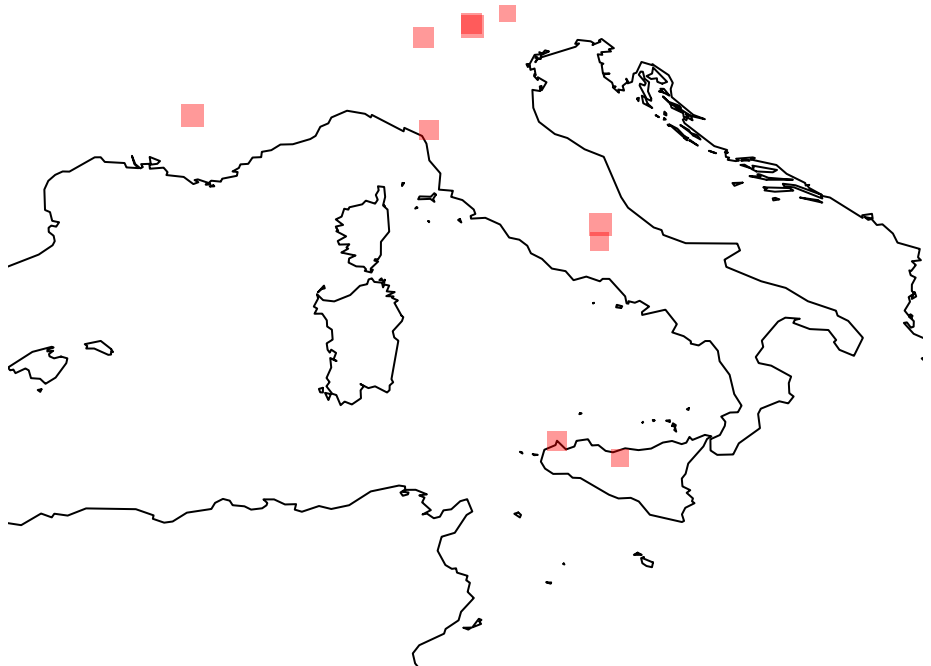

8625 cal. BC

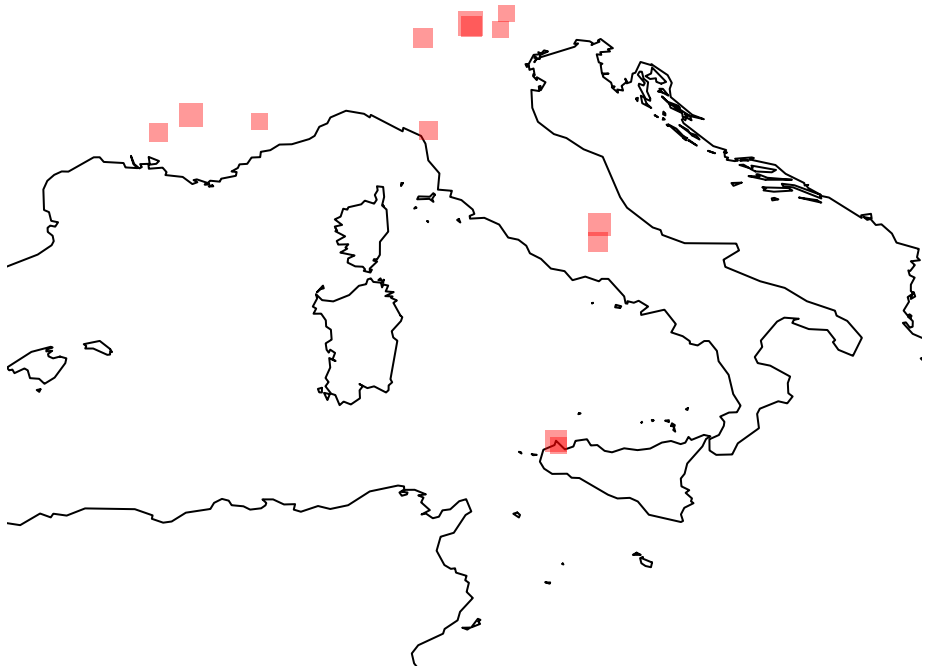



8615 cal. BC

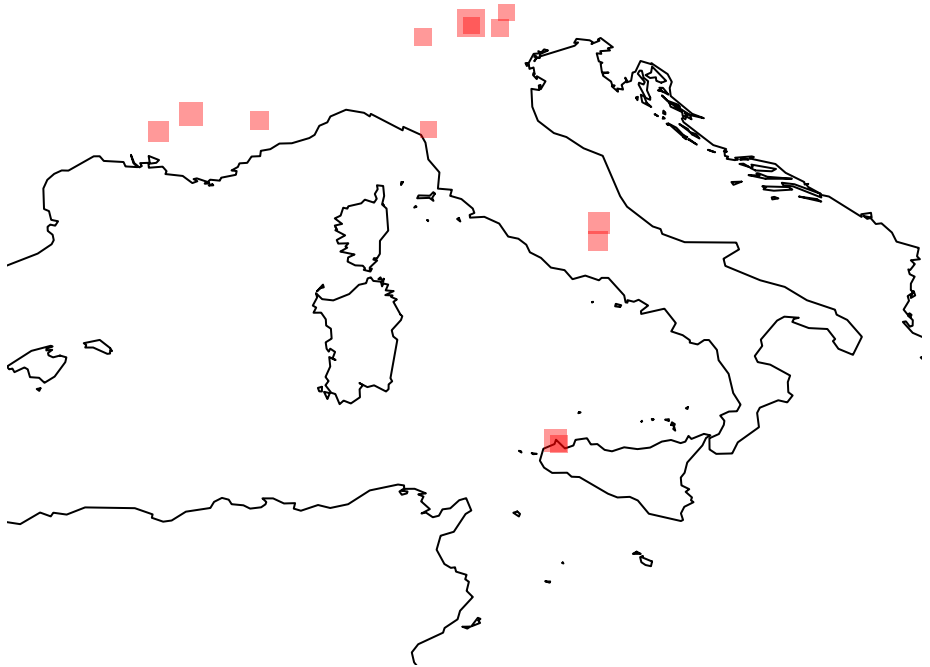

8610 cal. BC

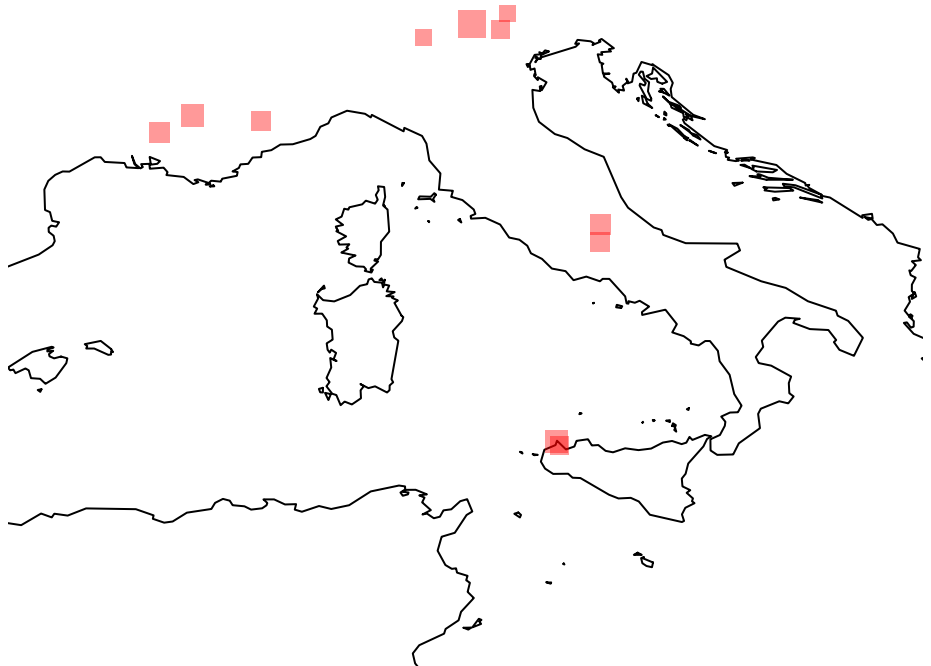



8605 cal. BC

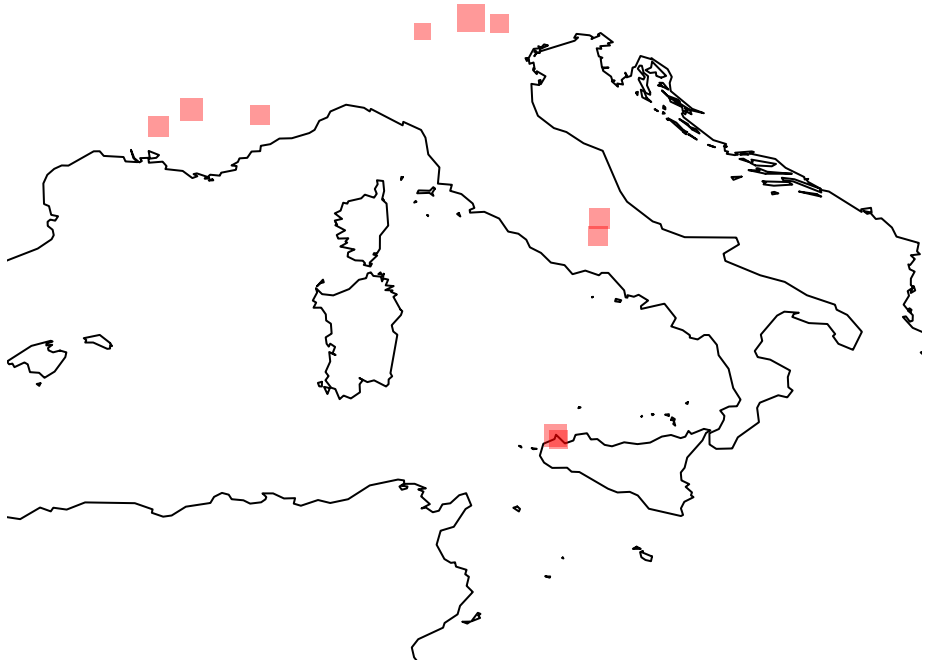



8595 cal. BC

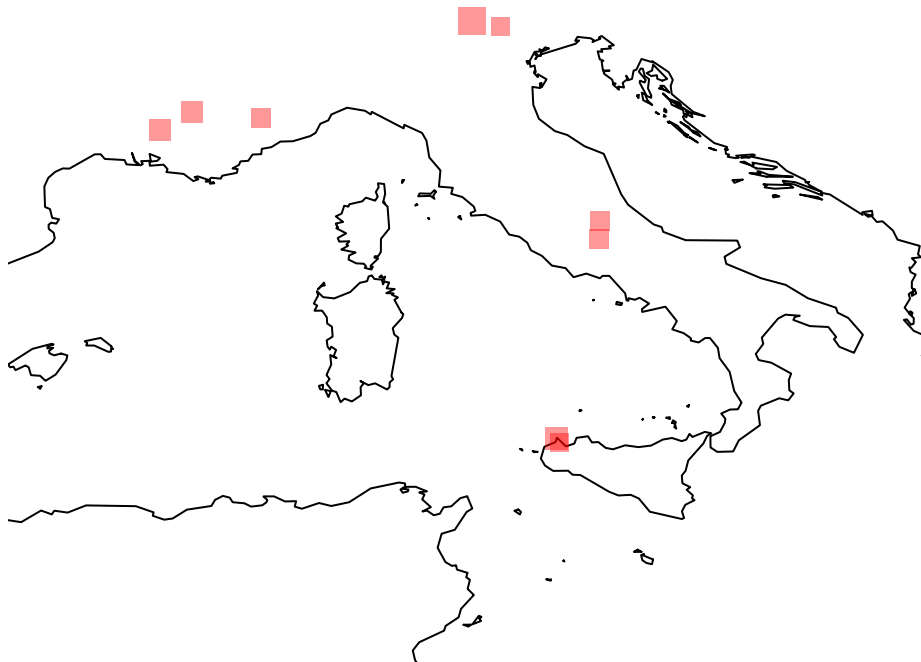

8590 cal. BC

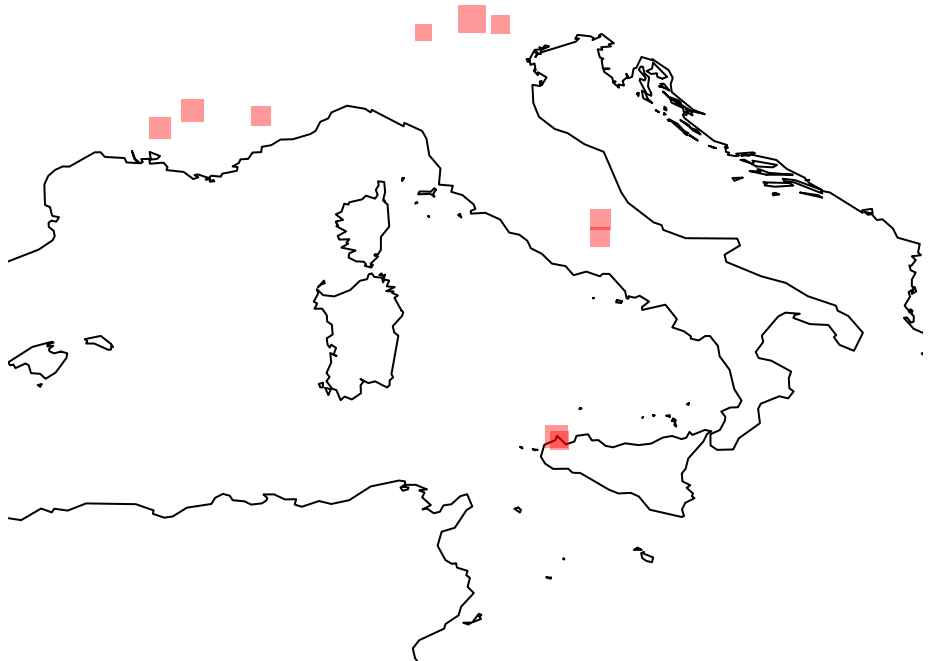



8580 cal. BC

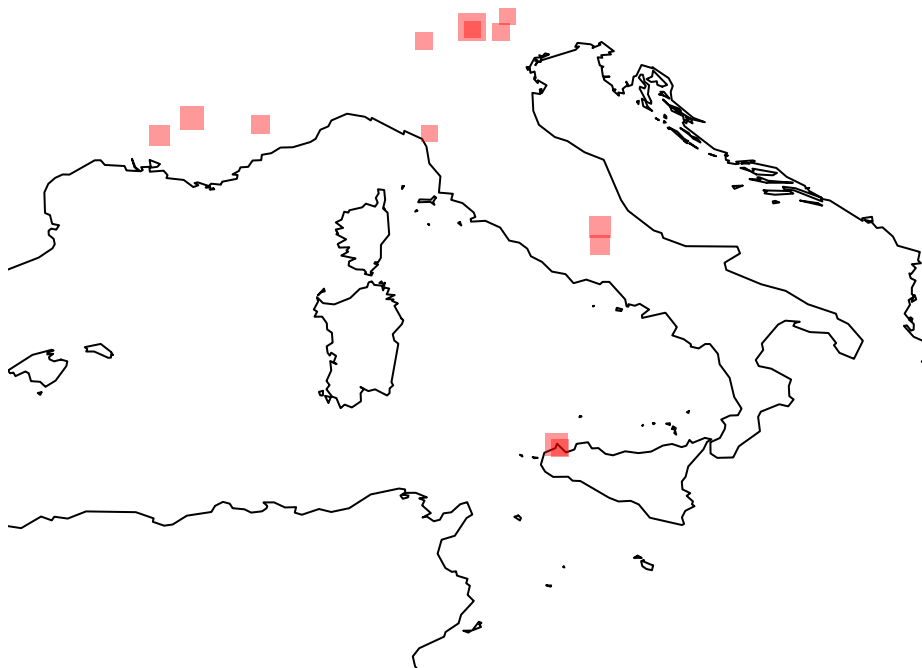



8570 cal. BC

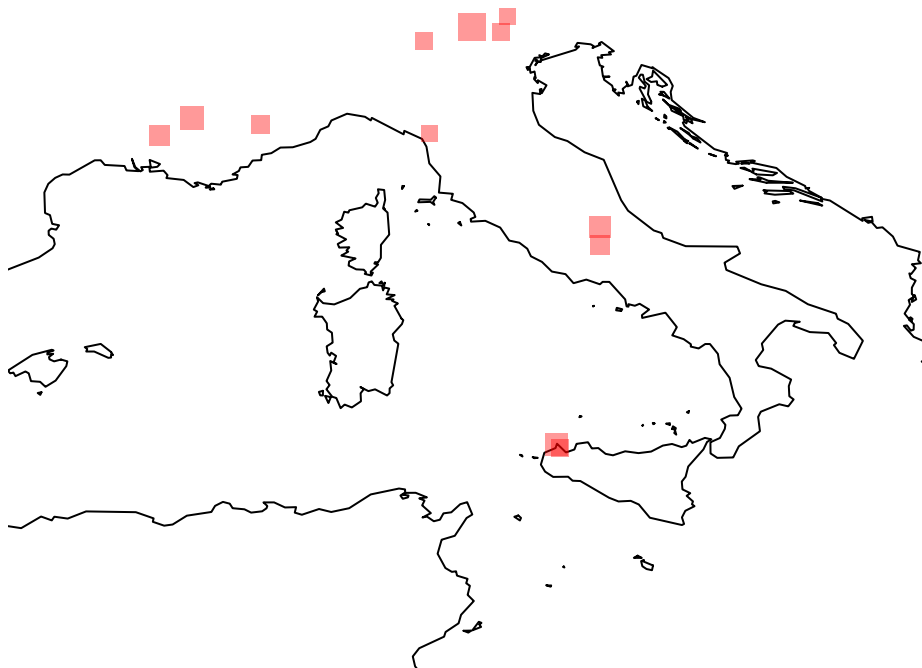



8565 cal. BC

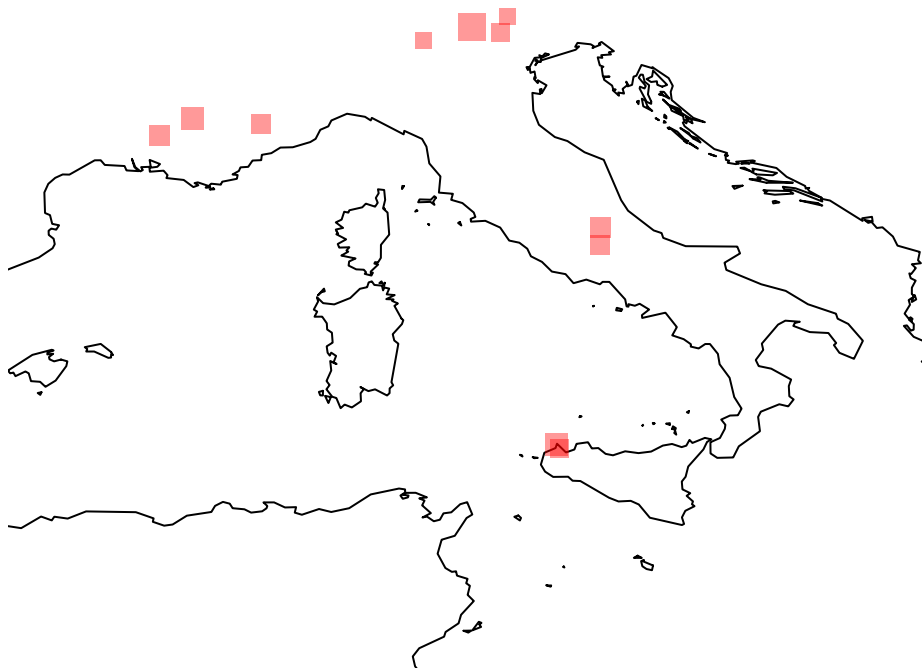

8560 cal. BC

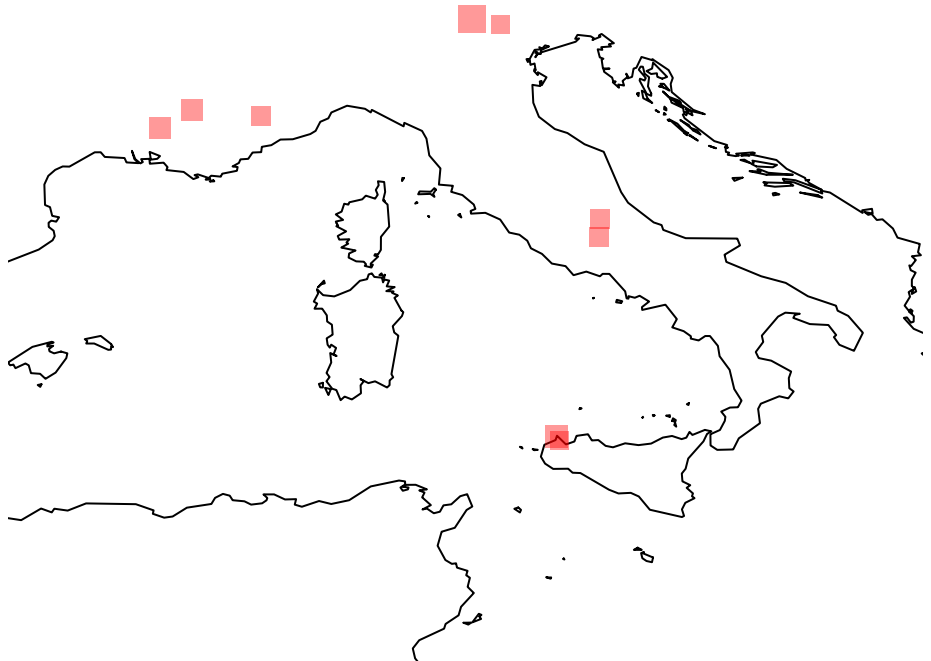



8550 cal. BC

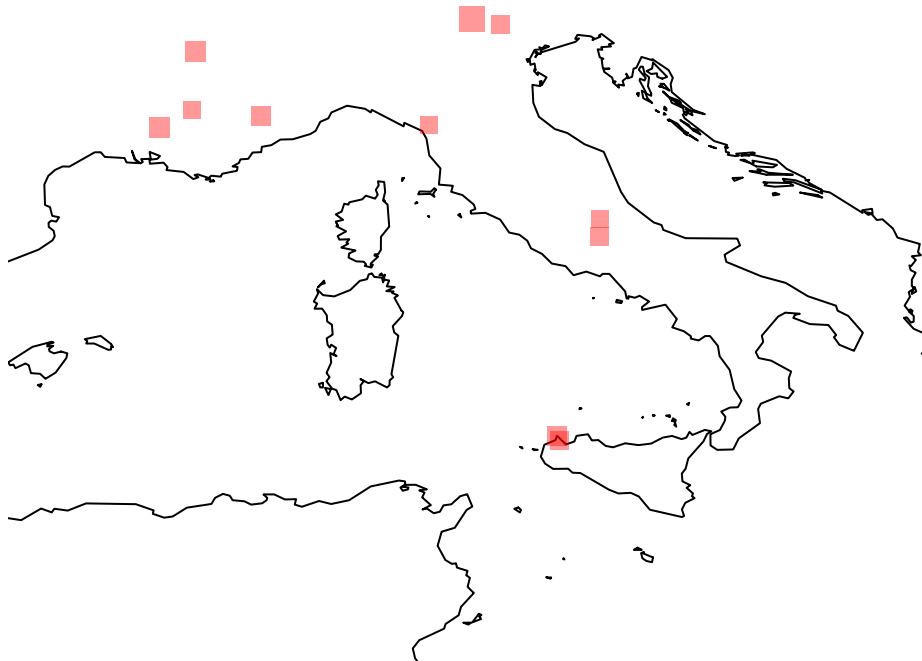

8545 cal. BC

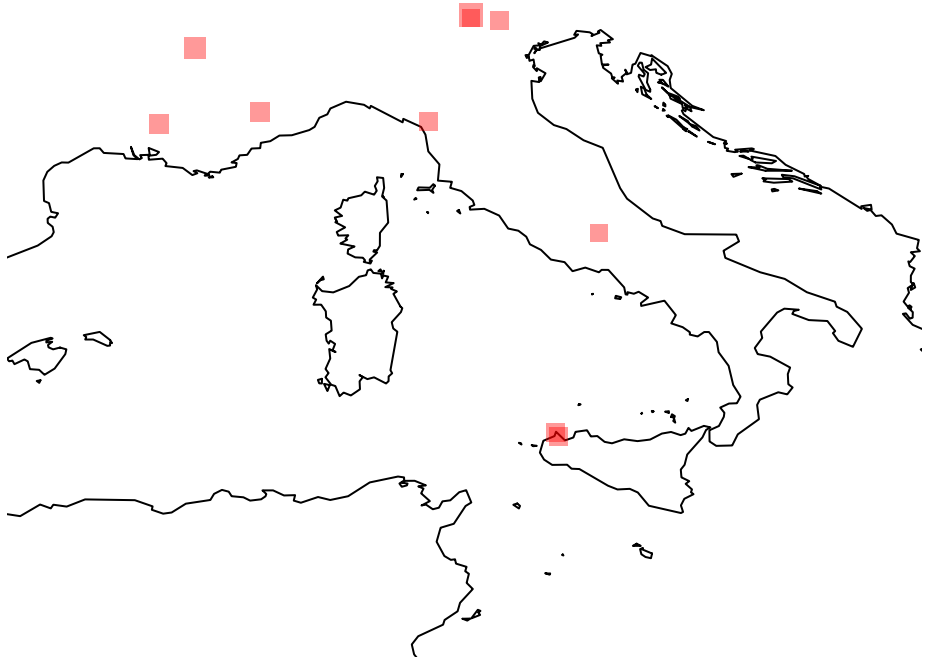

8540 cal. BC

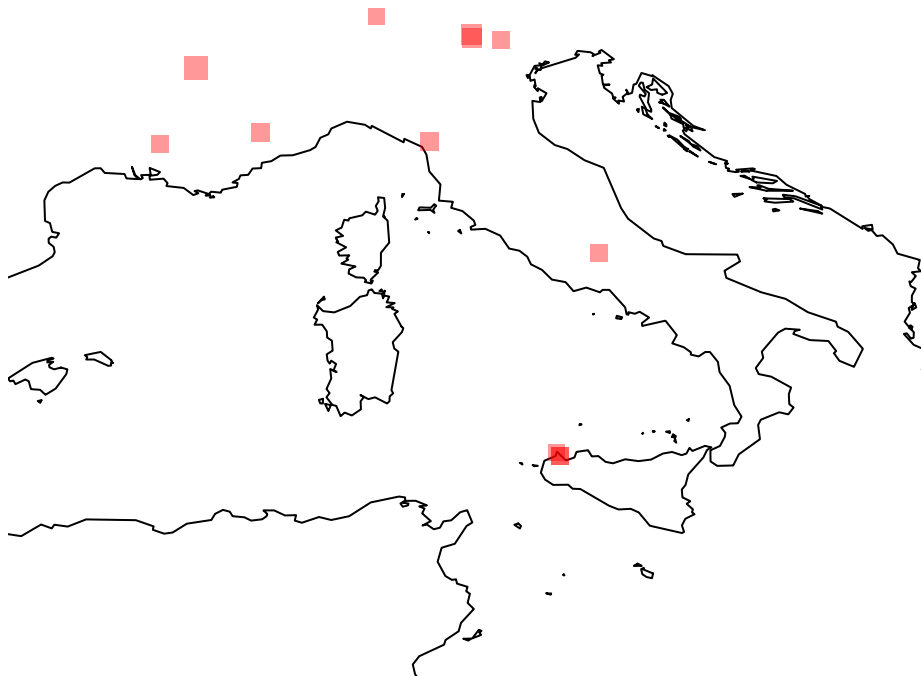

8535 cal. BC

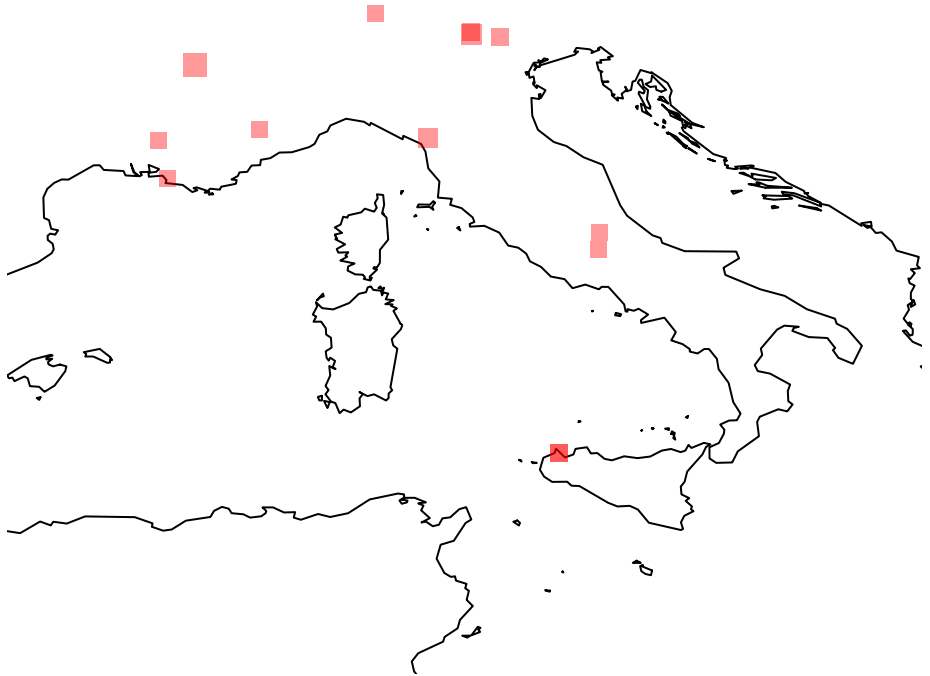

8530 cal. BC

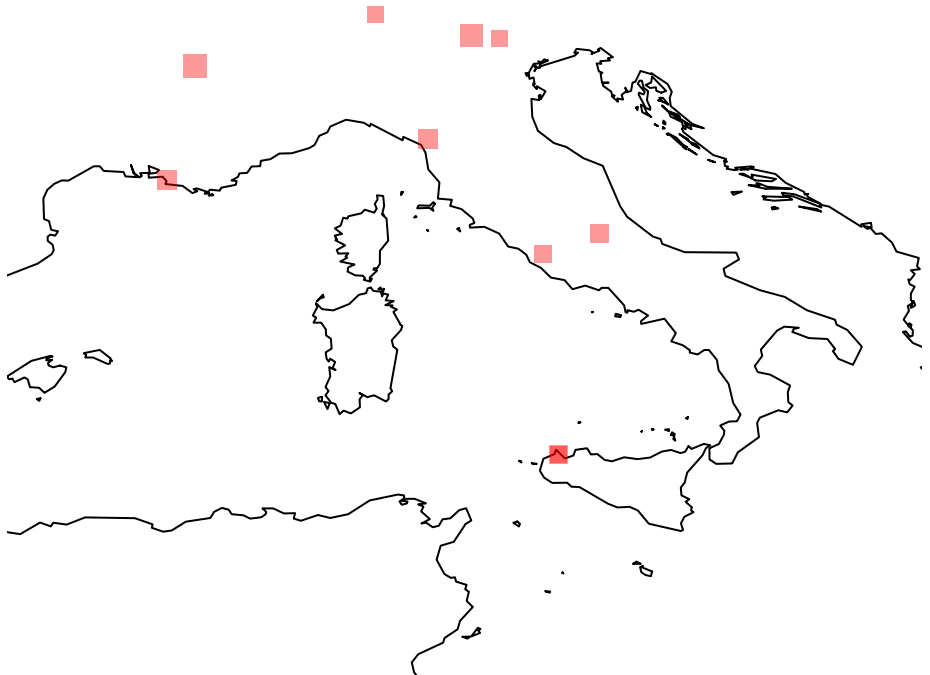



8525 cal. BC

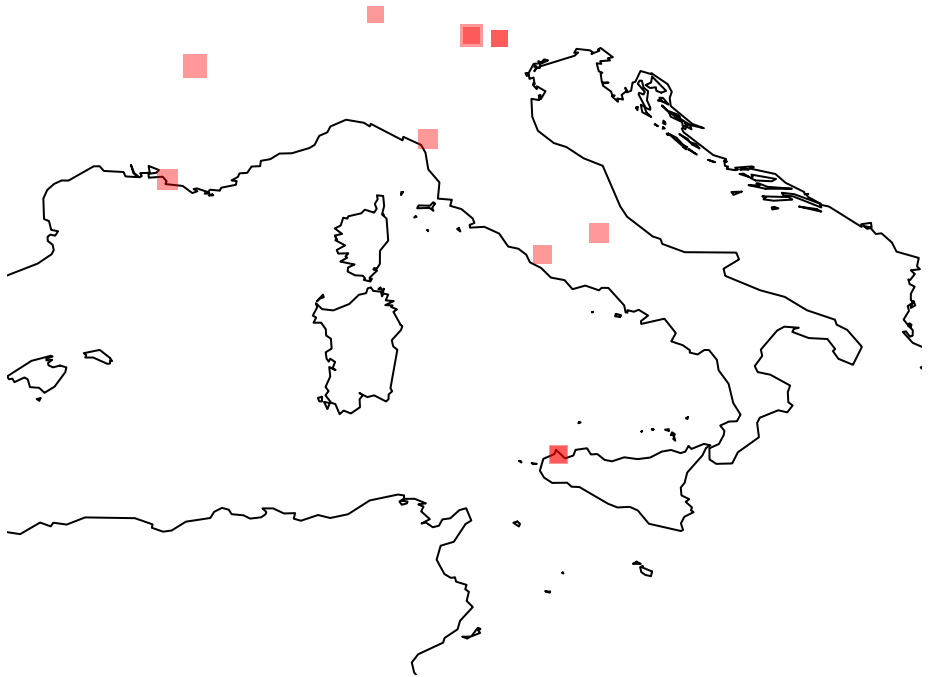

8520 cal. BC

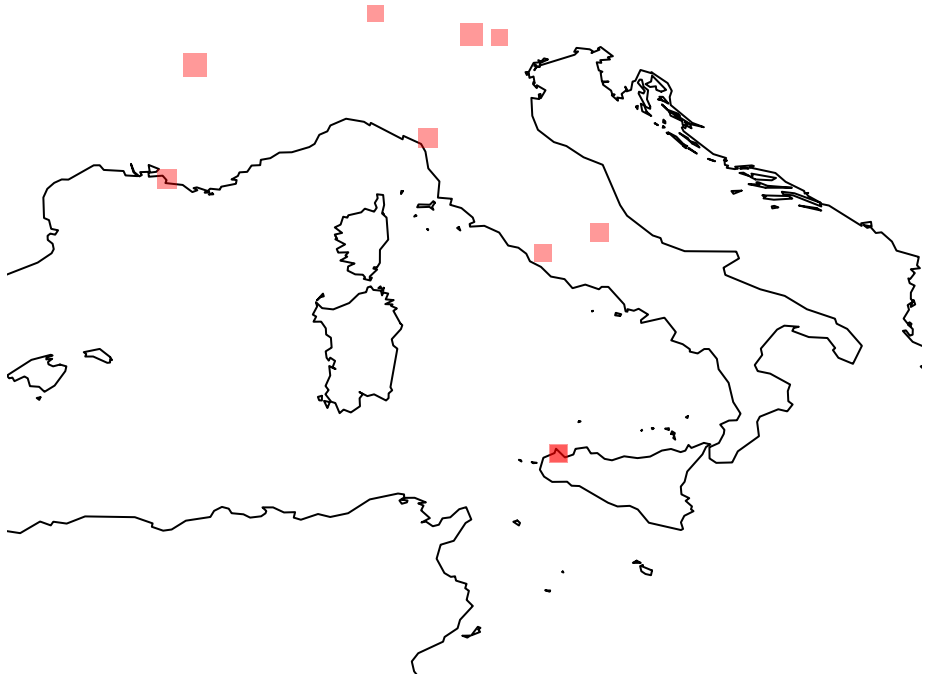

8515 cal. BC

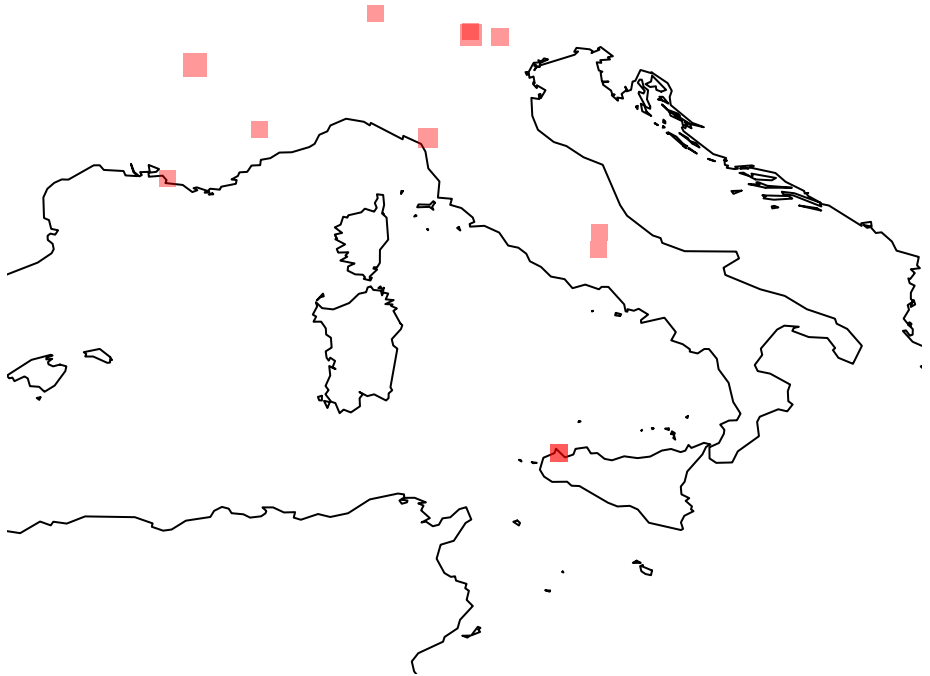

8510 cal. BC

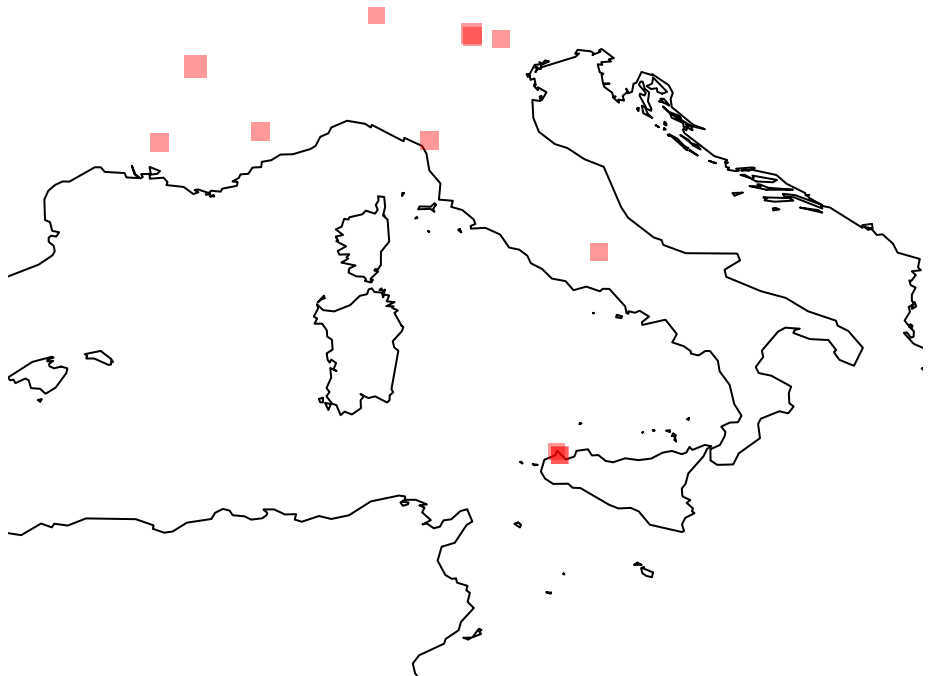

8505 cal. BC

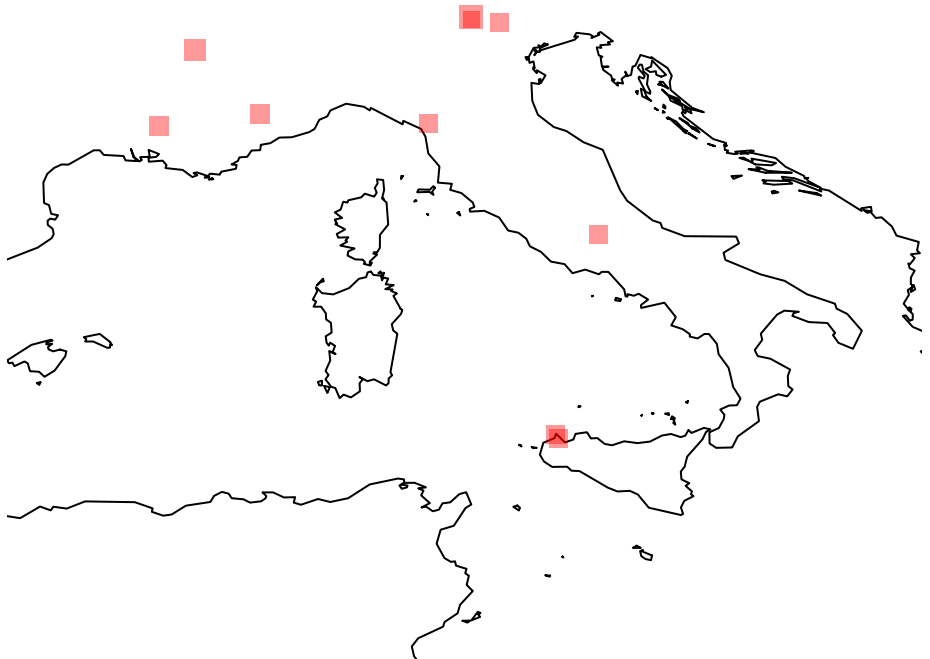



8495 cal. BC

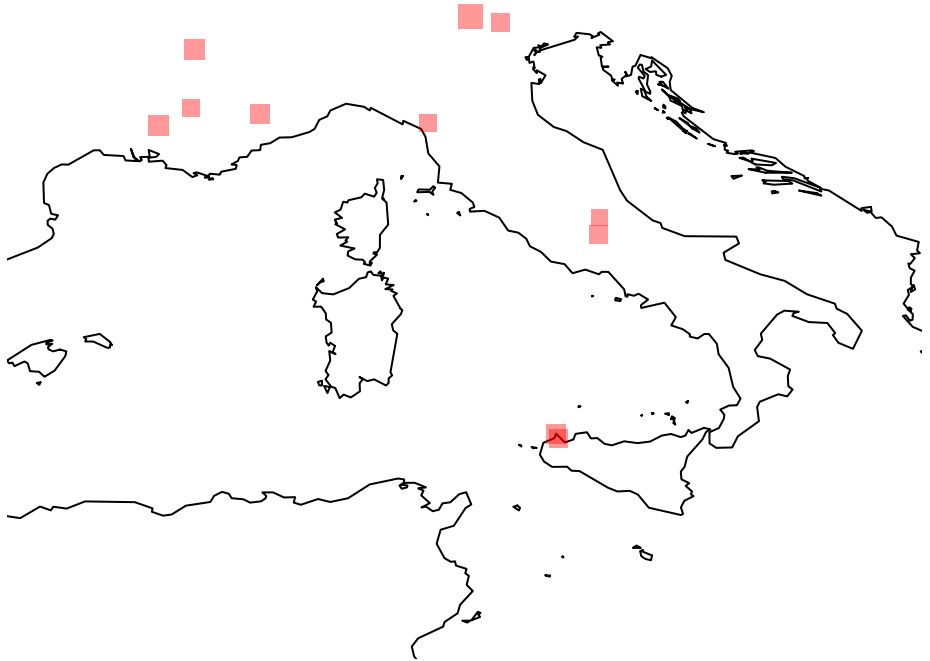

8490 cal. BC

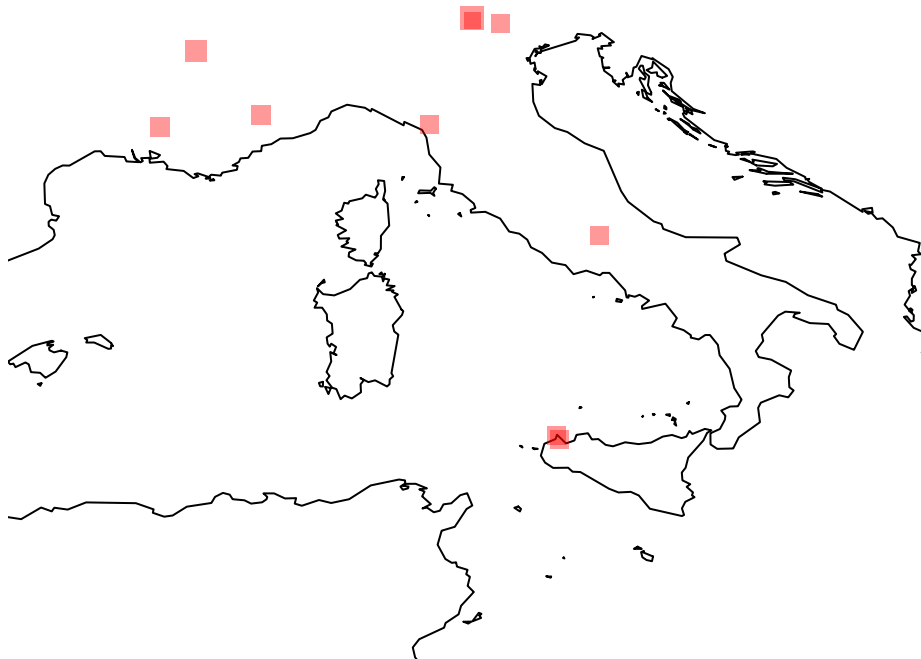



8485 cal. BC

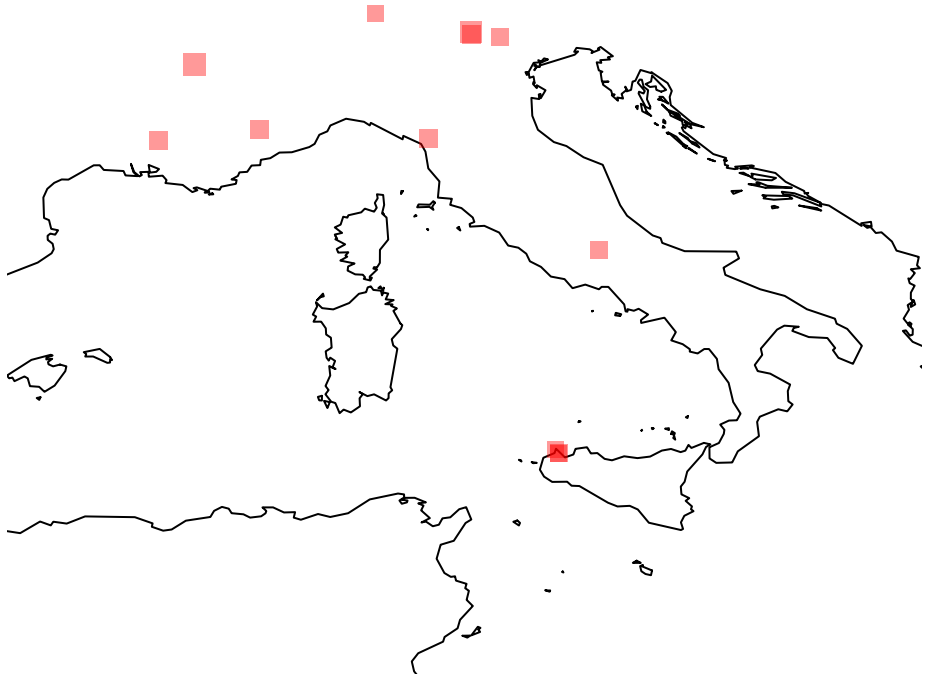

8480 cal. BC

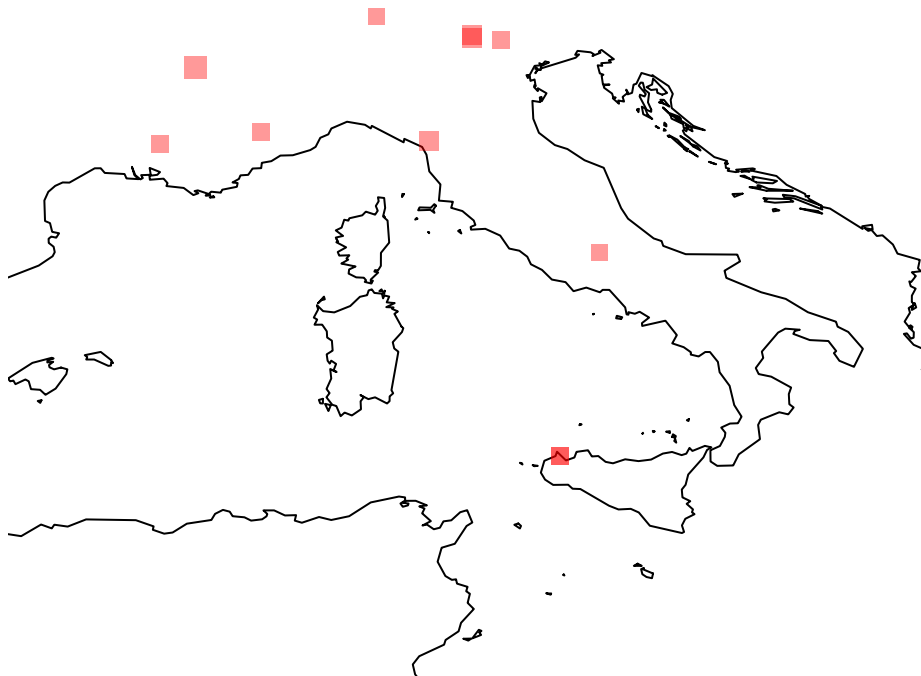

8475 cal. BC

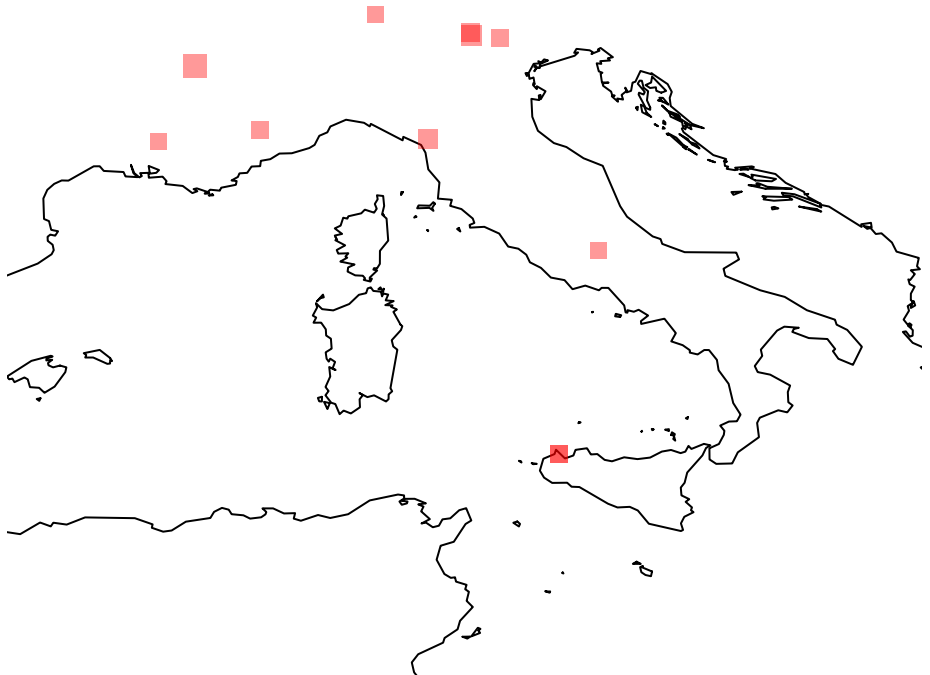

8470 cal. BC

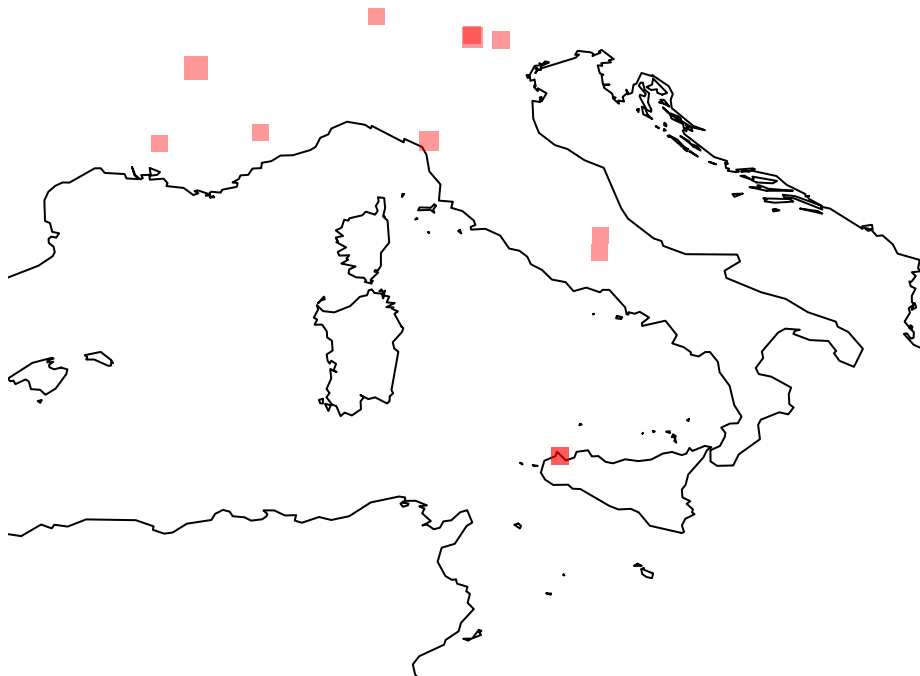

8465 cal. BC

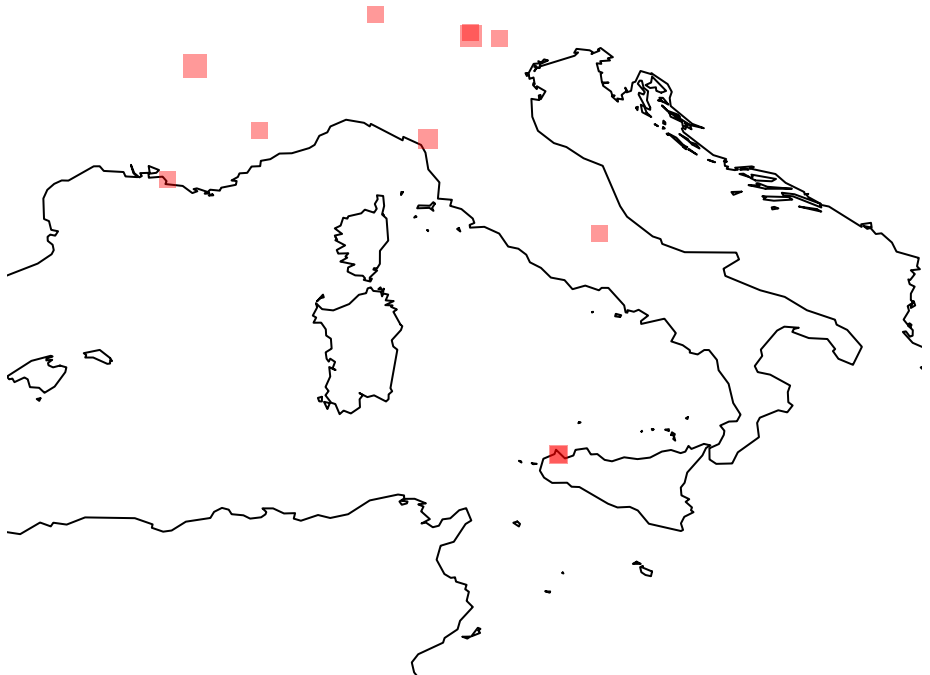

8460 cal. BC

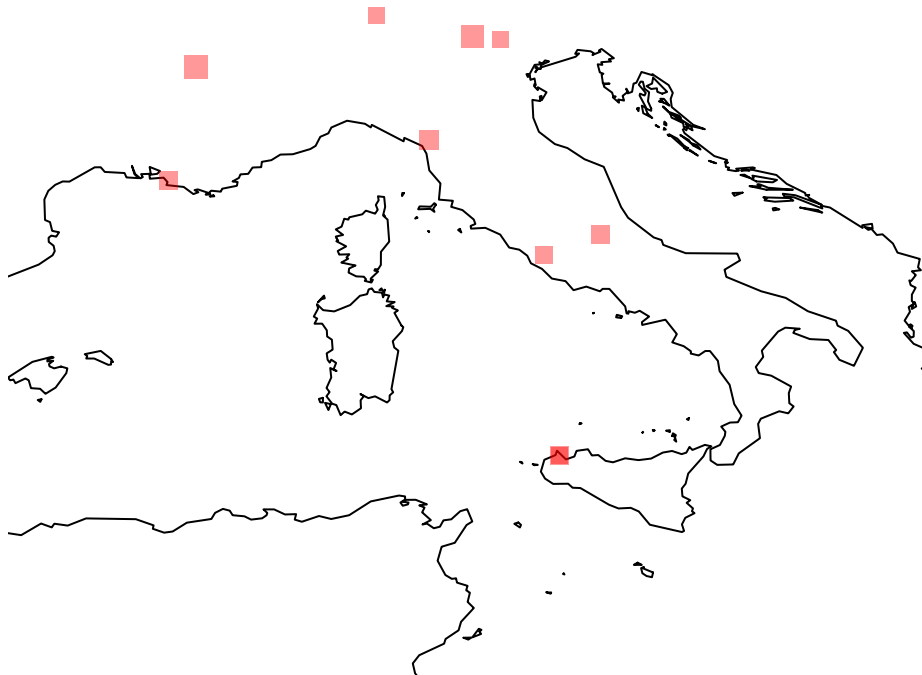

8455 cal. BC

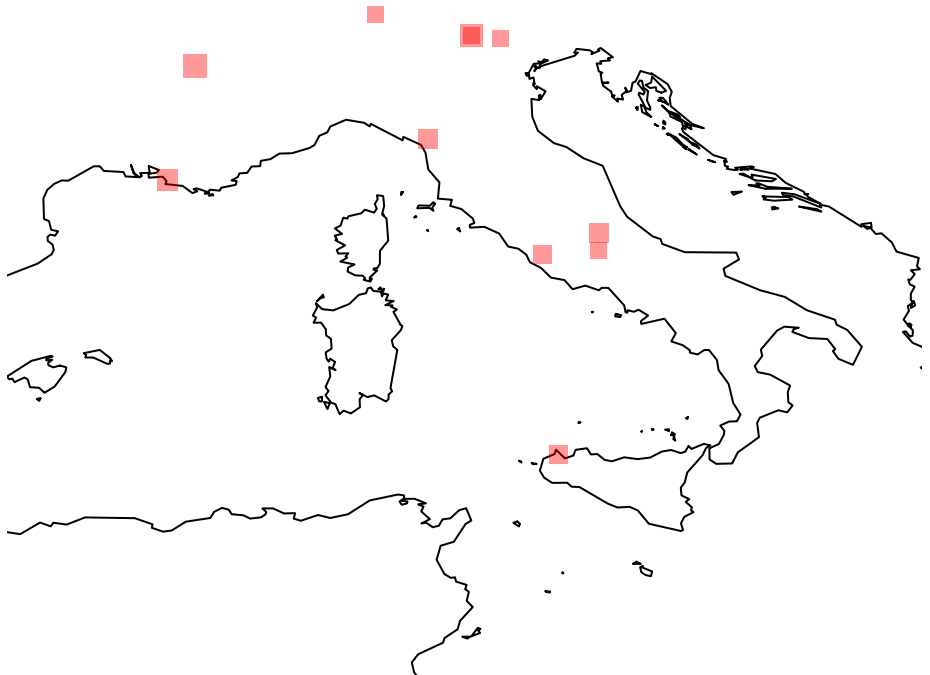

**8450 cal. BC**

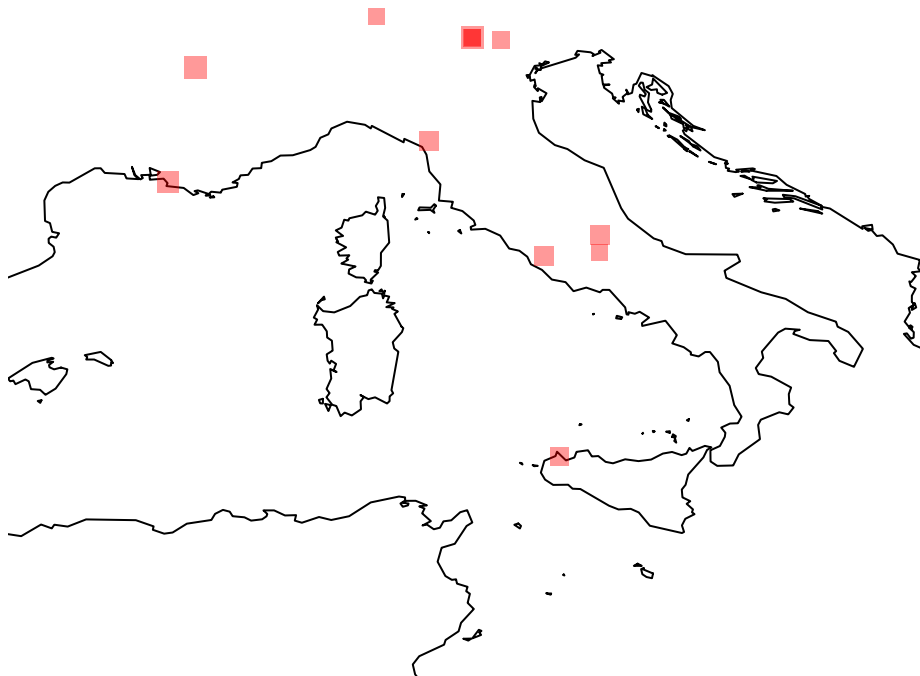



8445 cal. BC

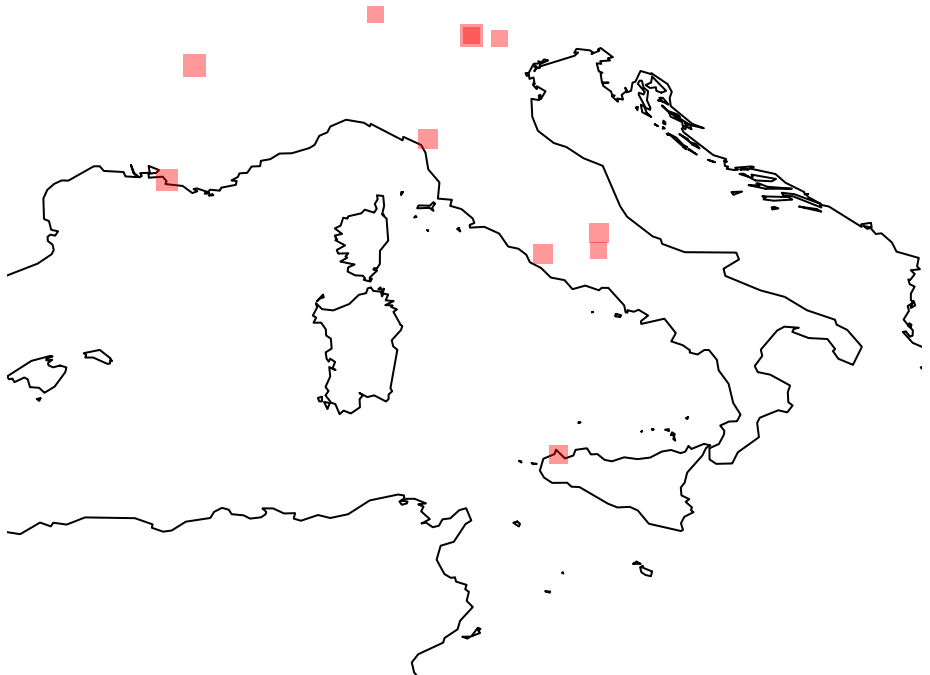

8440 cal. BC

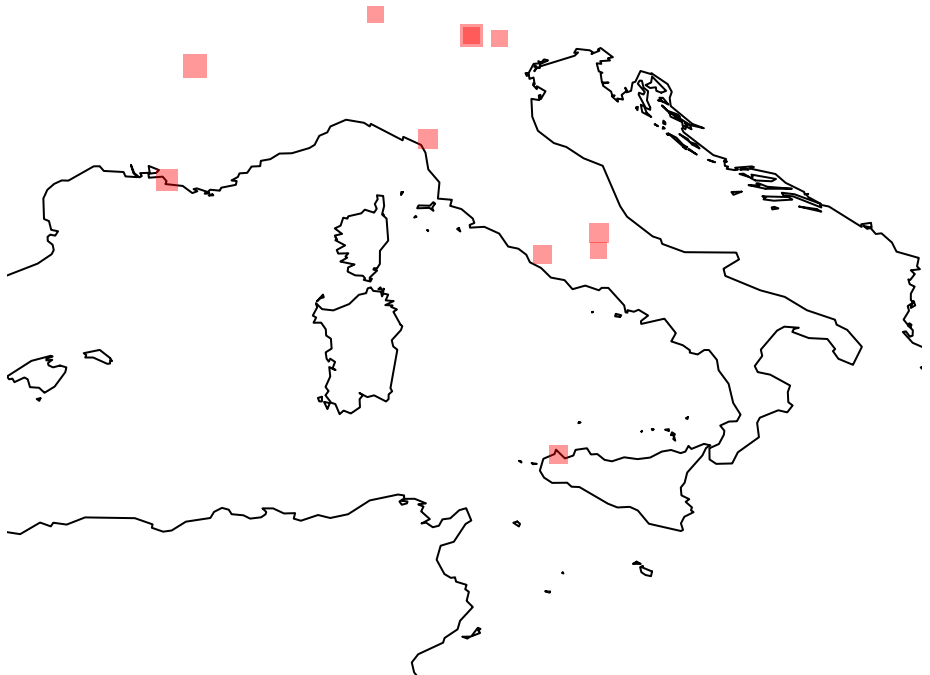

8435 cal. BC

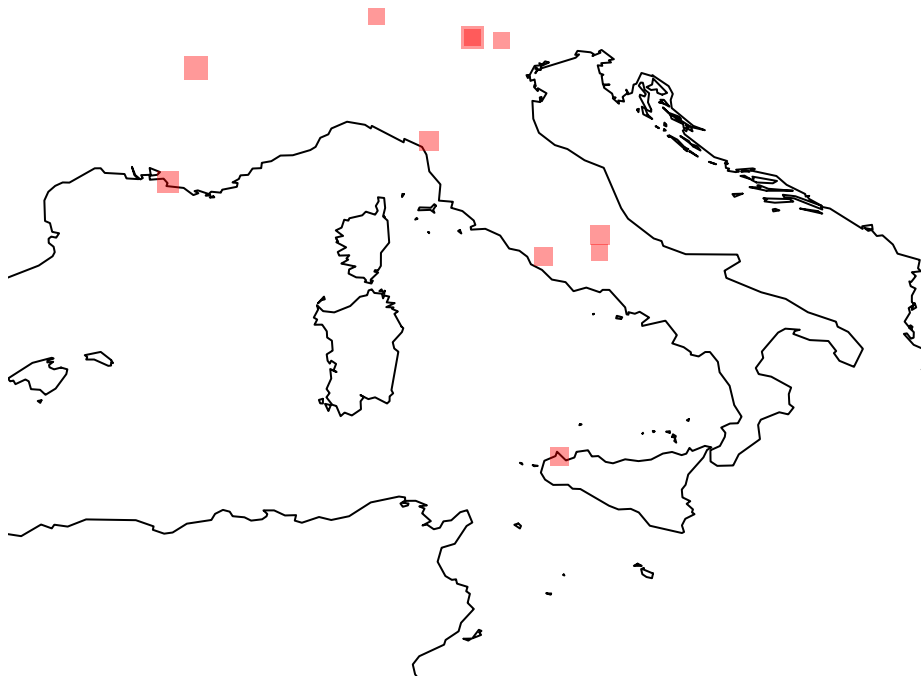

**8430 cal. BC**

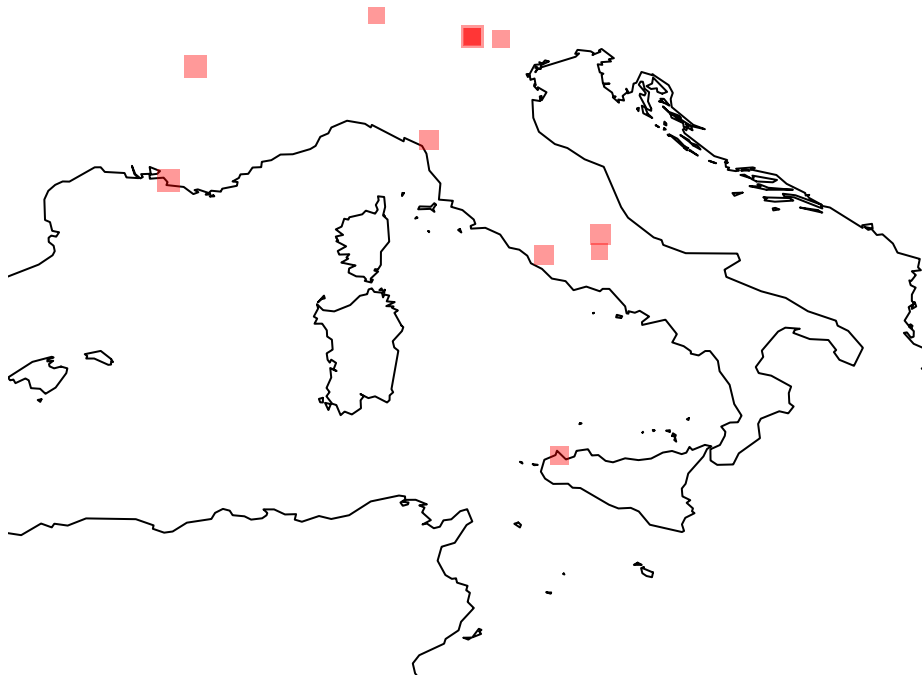

8425 cal. BC

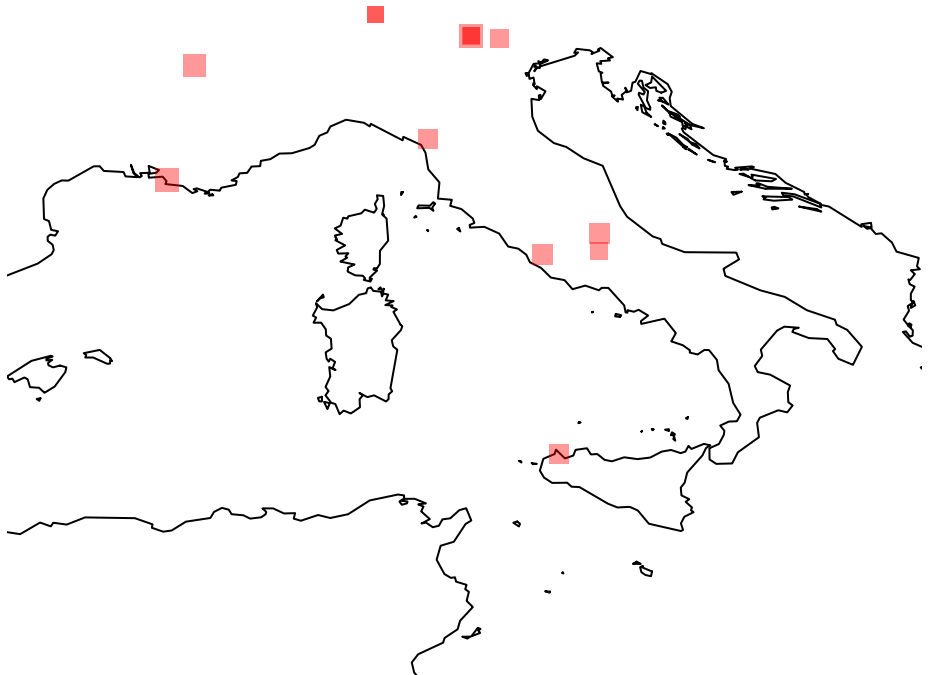

8420 cal. BC

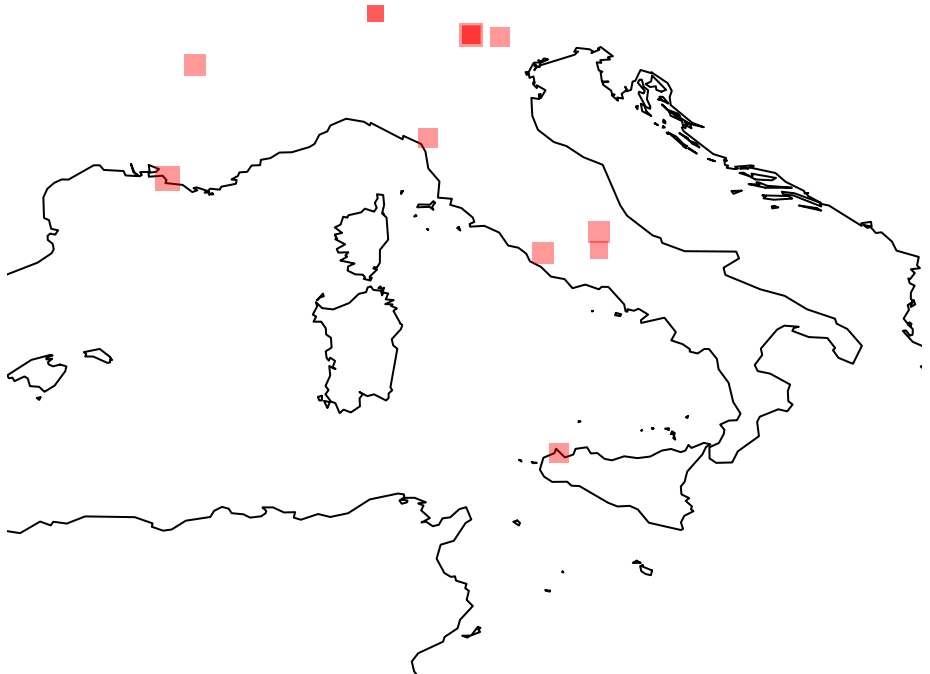

8415 cal. BC

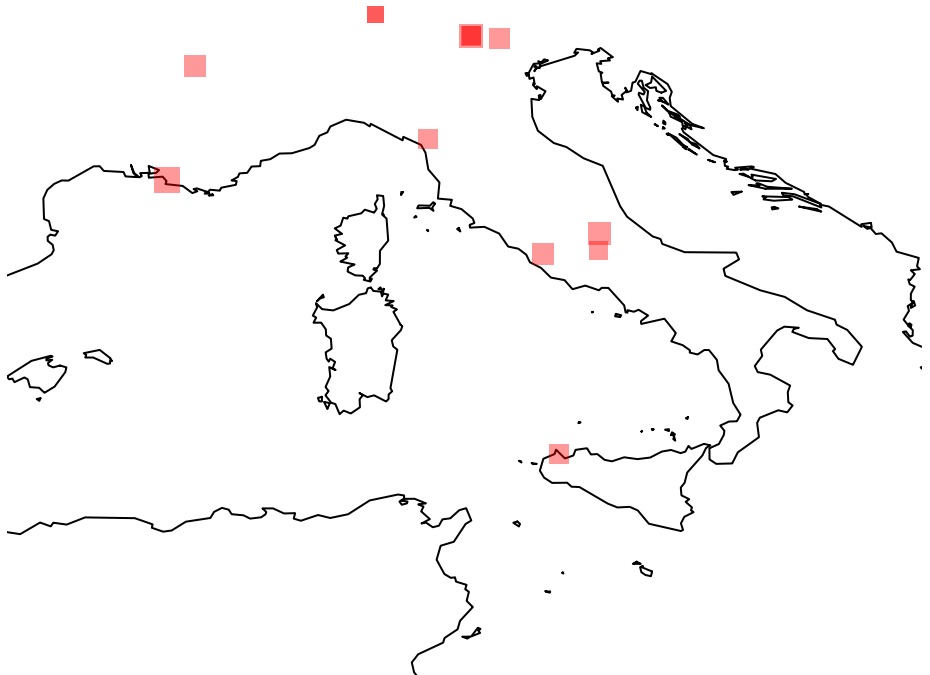

8410 cal. BC

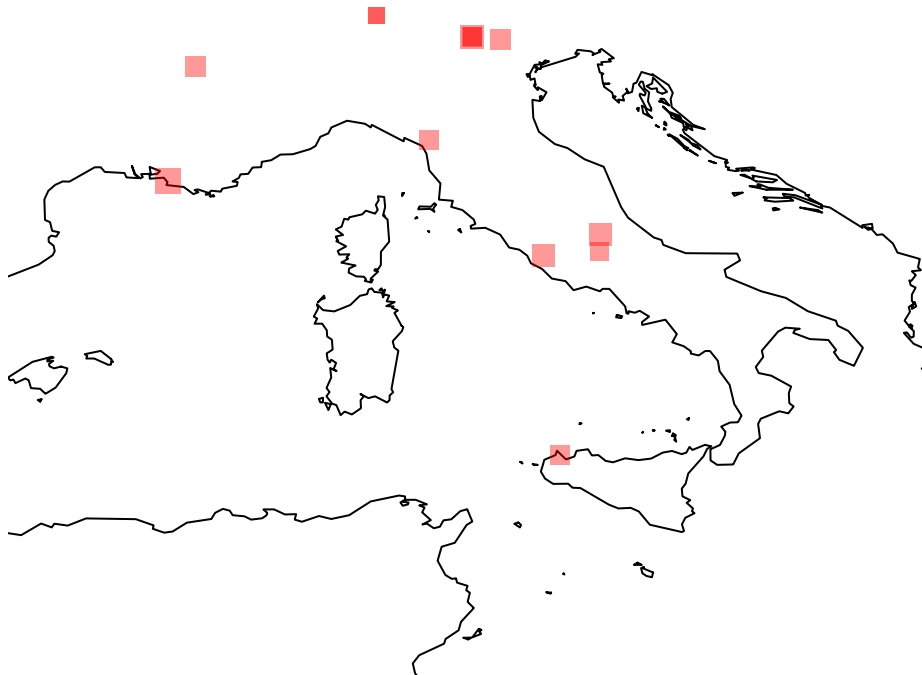



8405 cal. BC

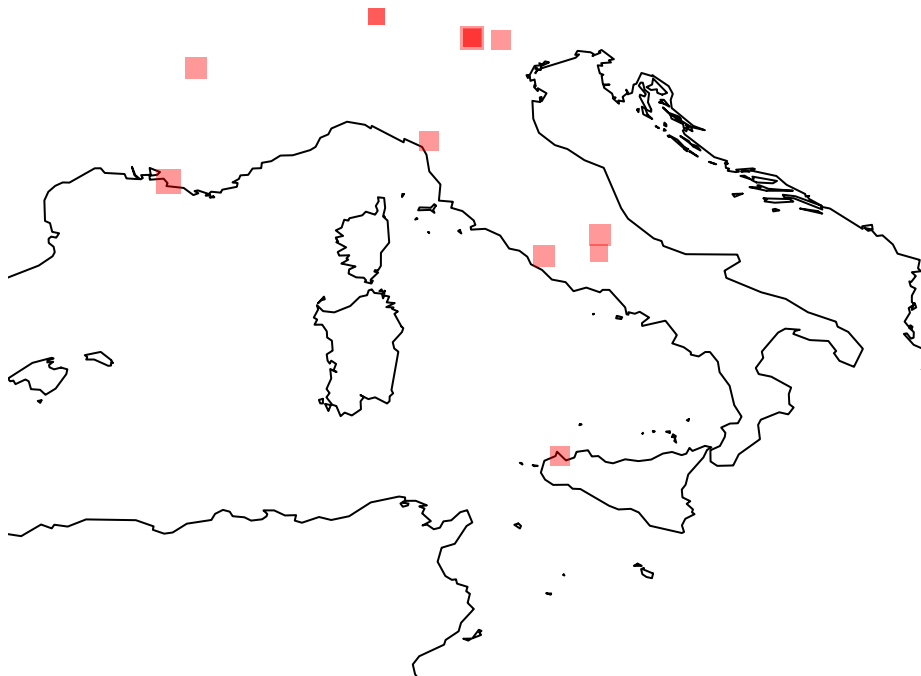

8400 cal. BC

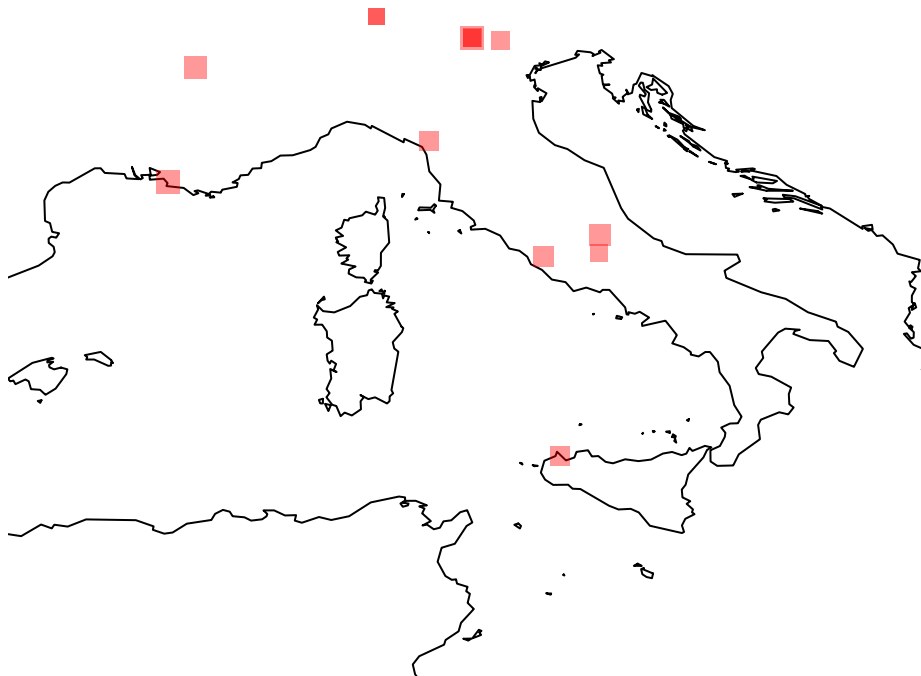

8395 cal. BC

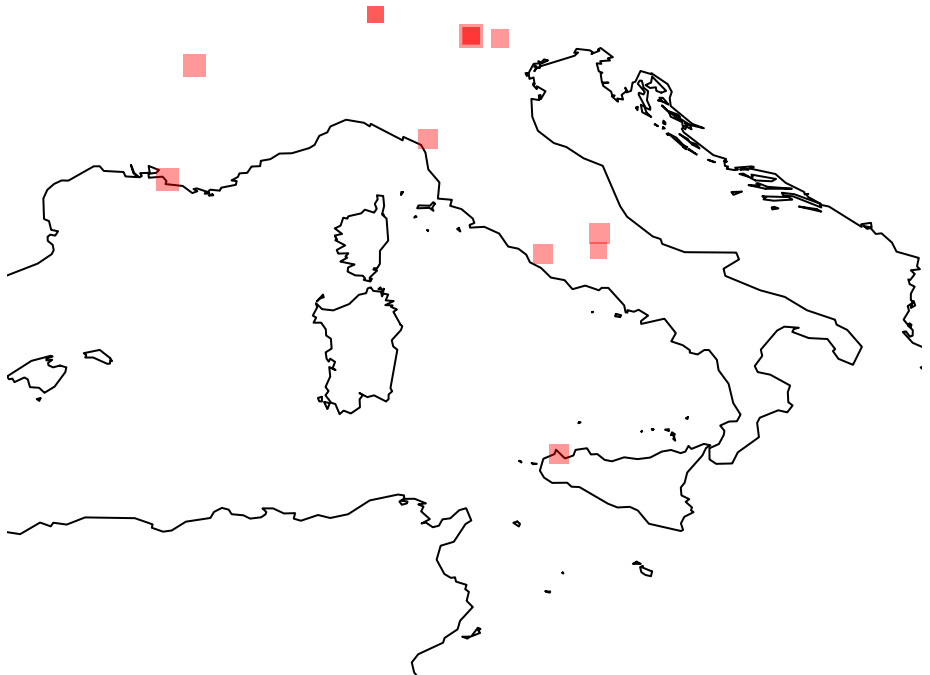

8390 cal. BC

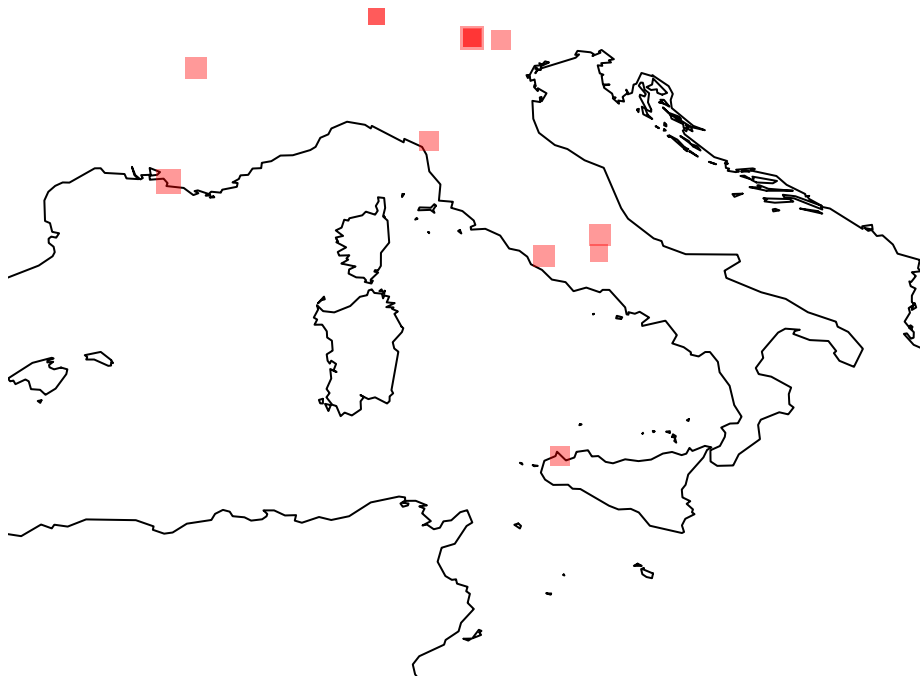

8385 cal. BC

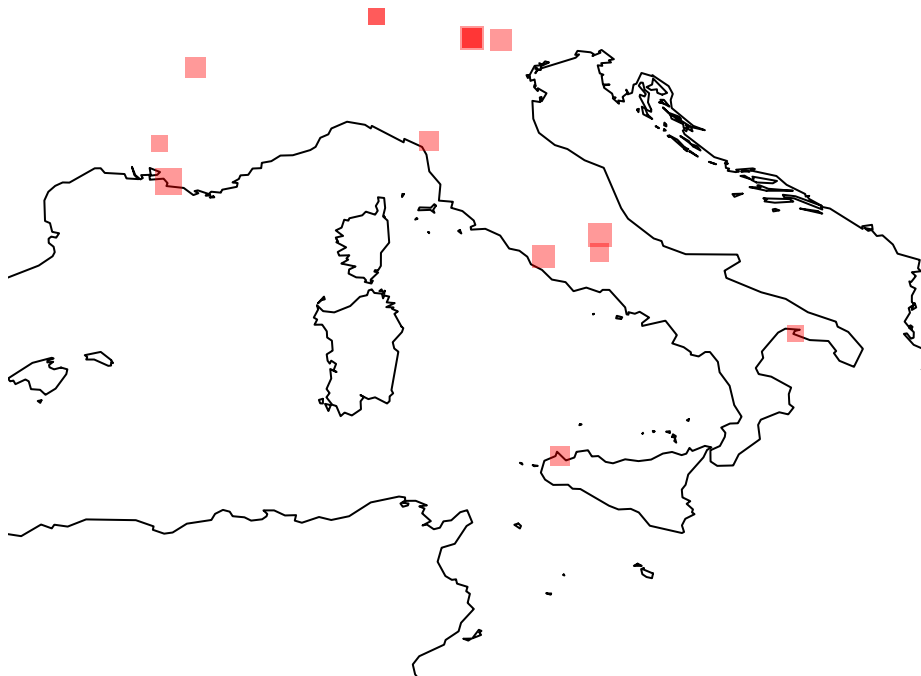

8380 cal. BC

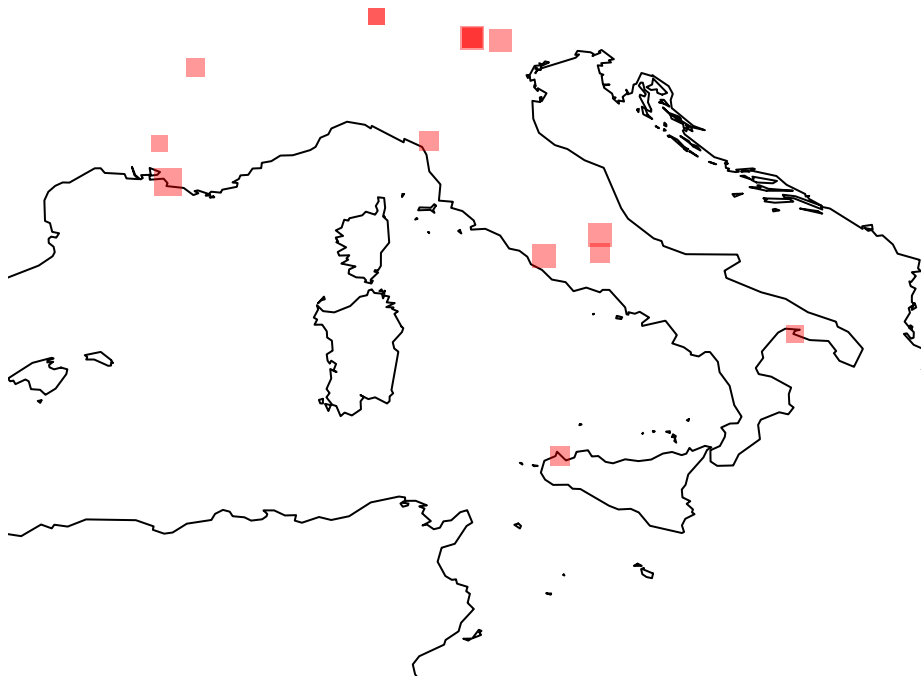

8375 cal. BC

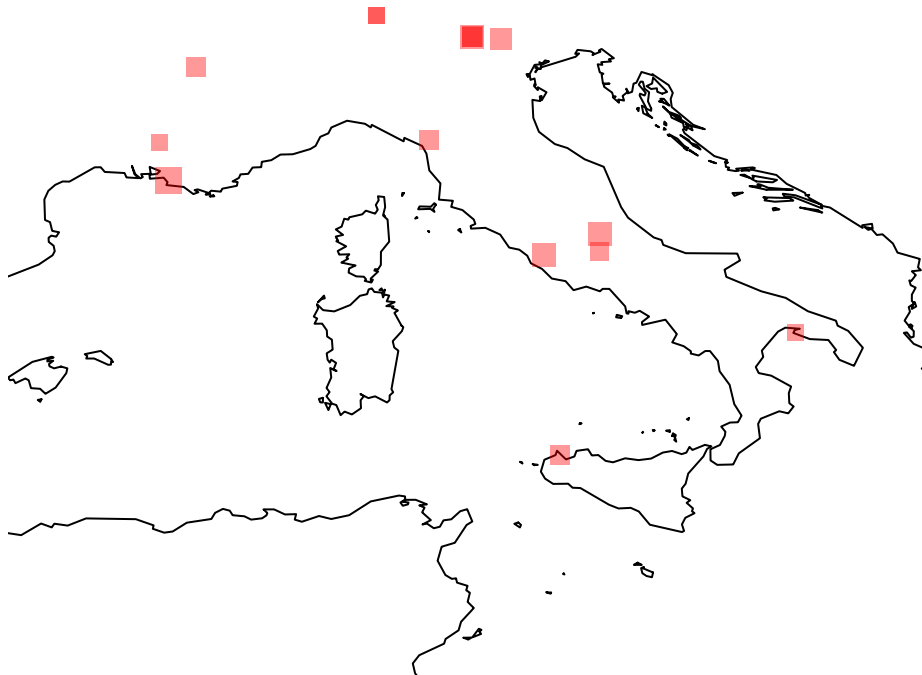

8370 cal. BC

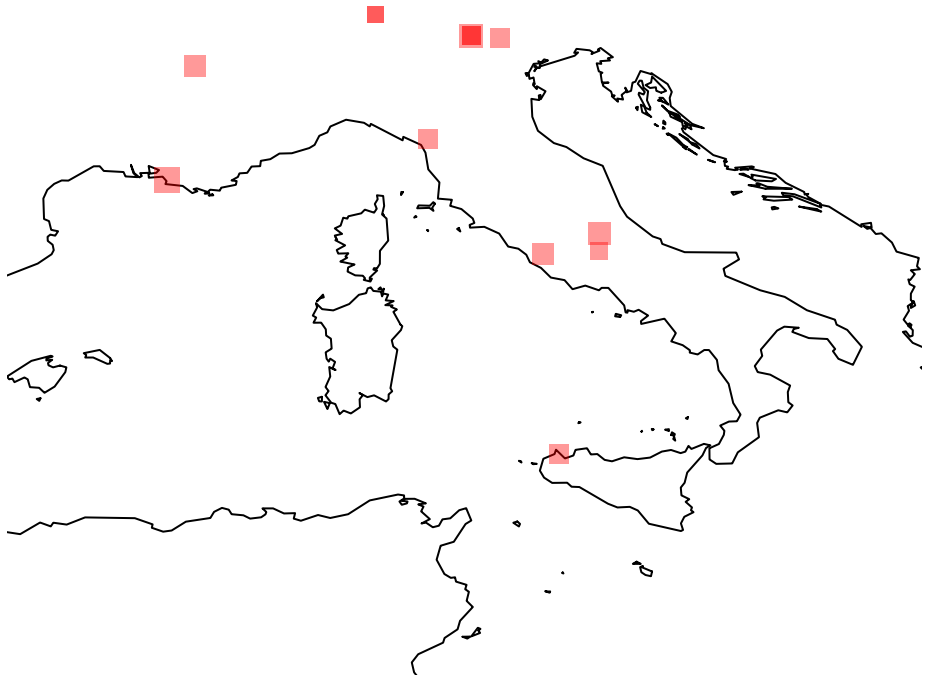



8365 cal. BC

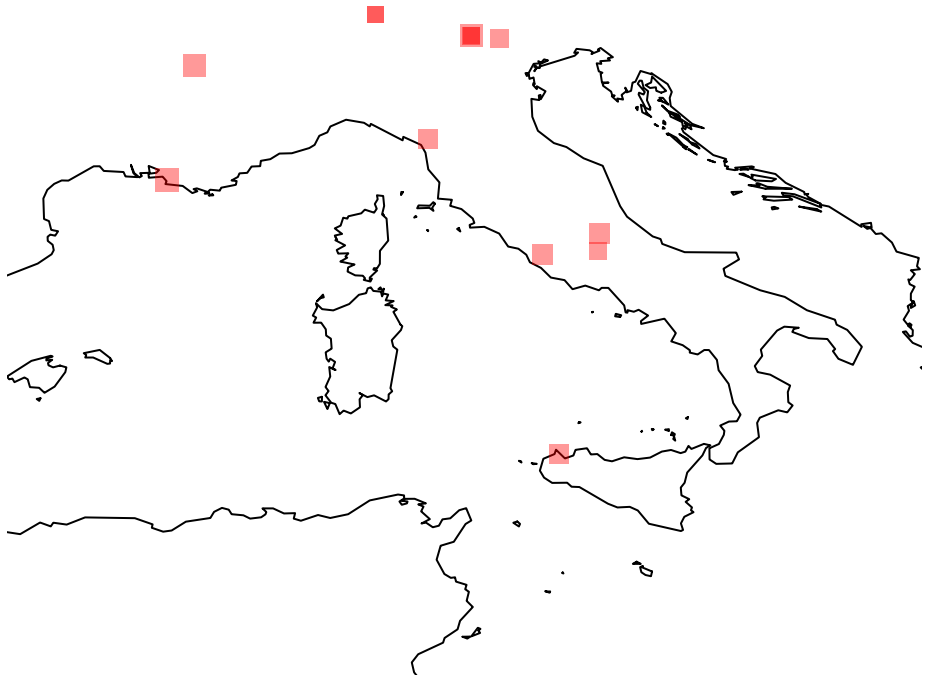

8360 cal. BC

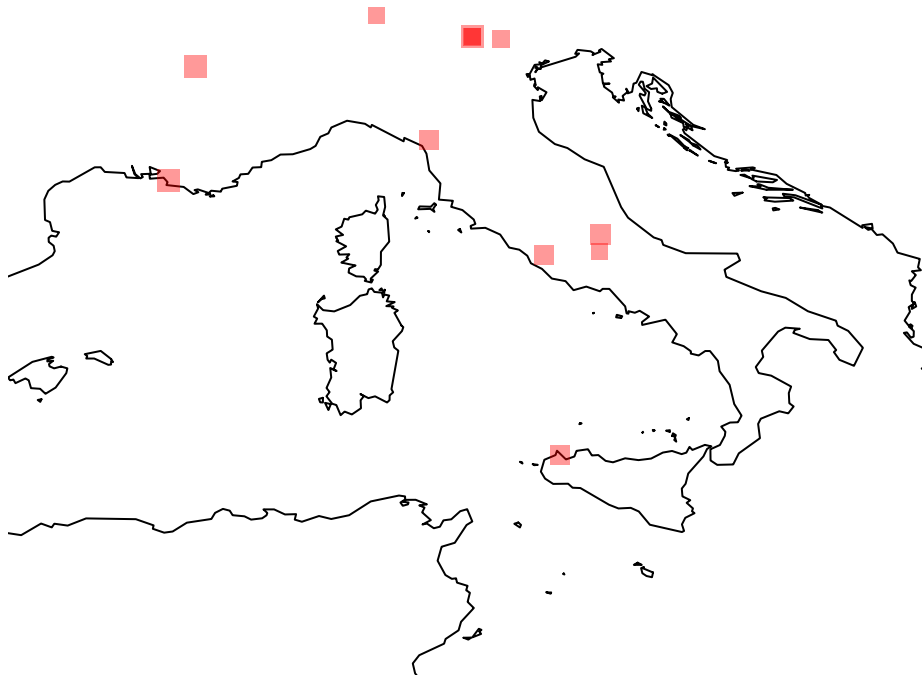

8355 cal. BC

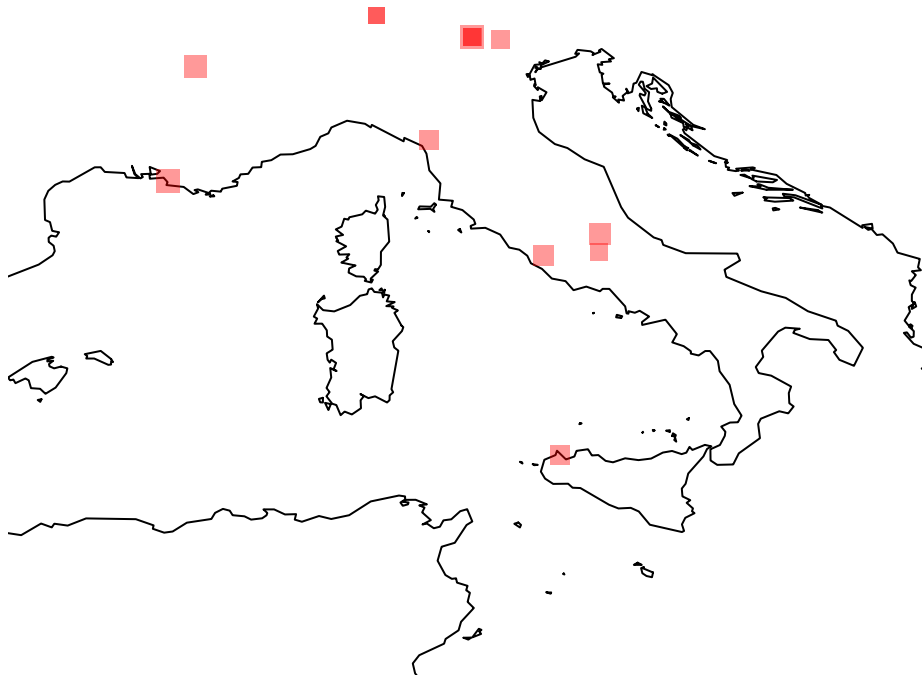

8350 cal. BC

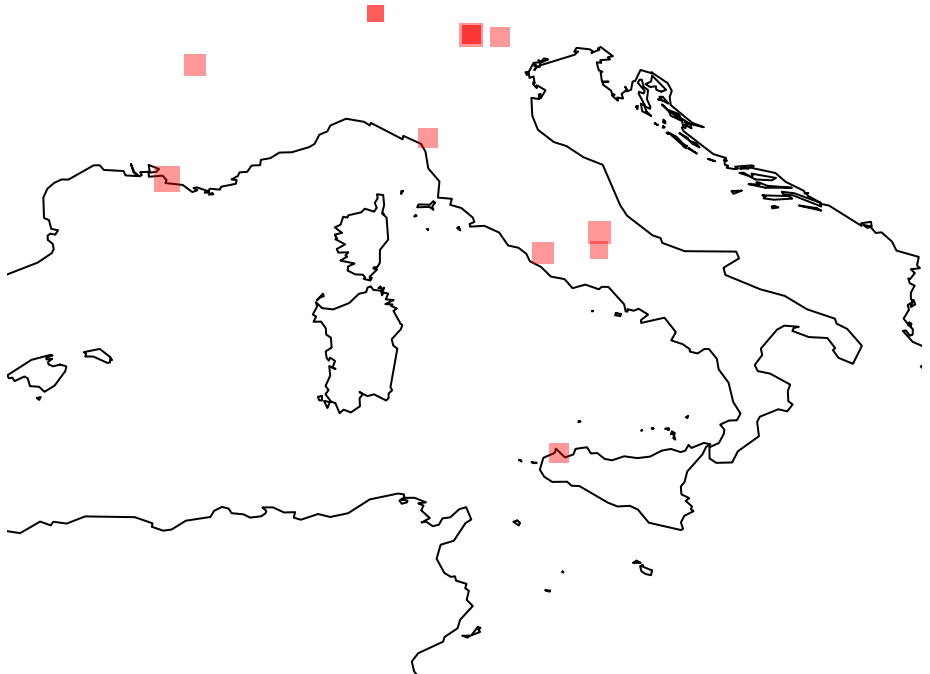

8345 cal. BC

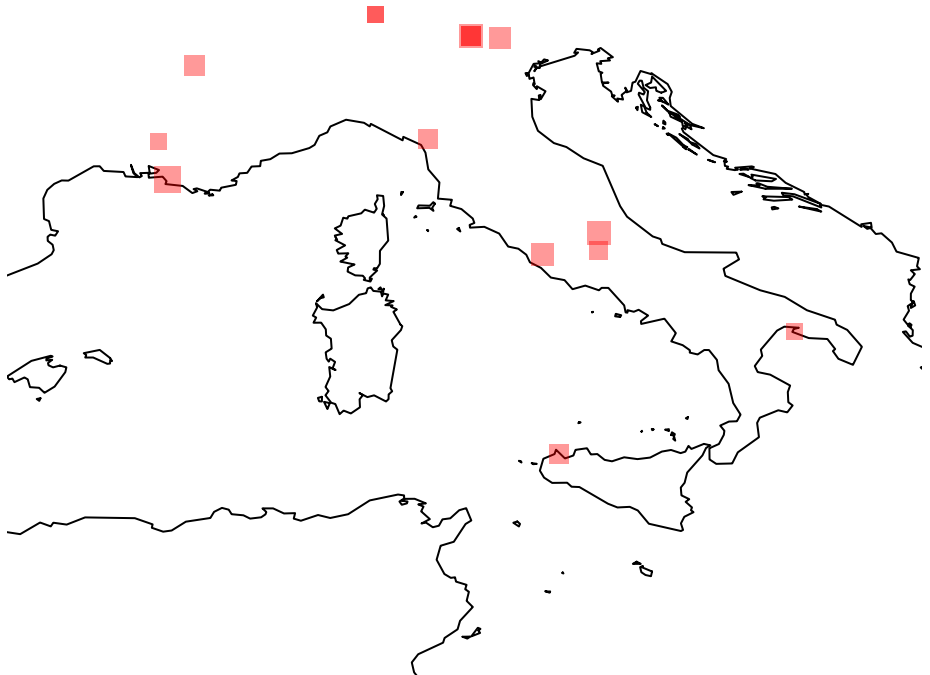

8340 cal. BC

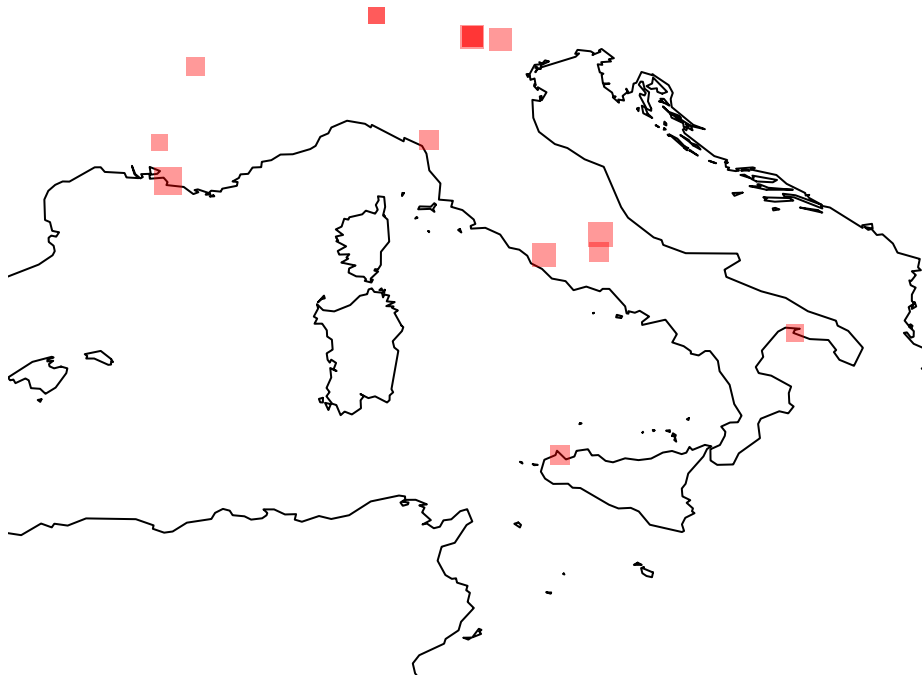

8335 cal. BC

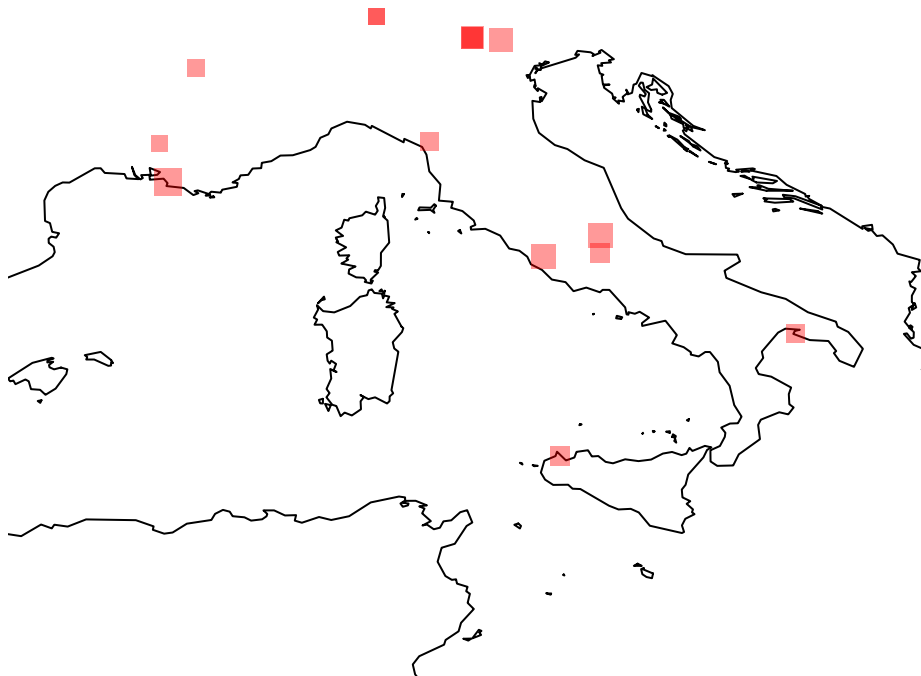

8330 cal. BC

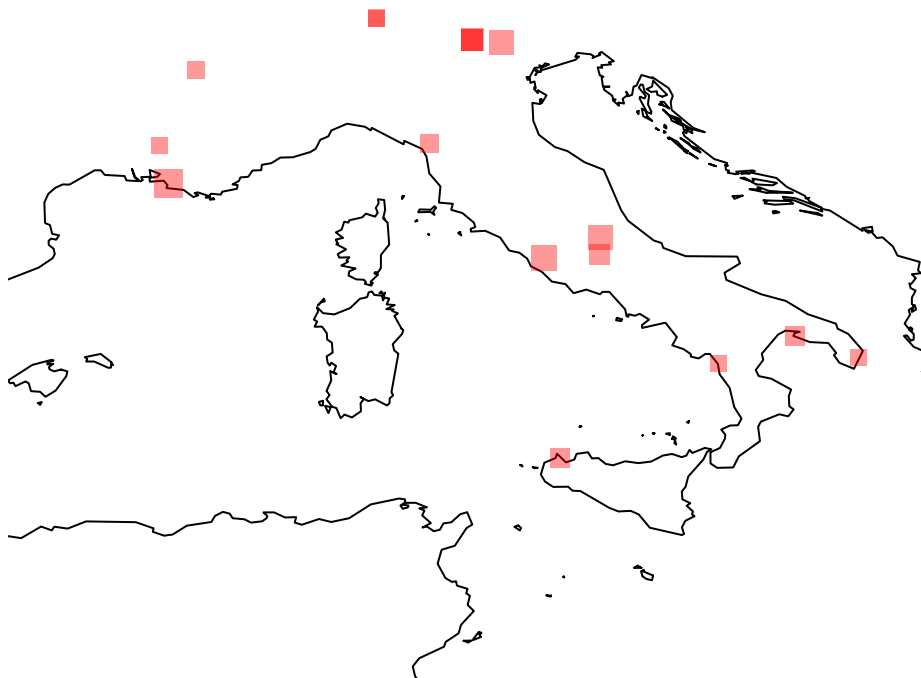



8325 cal. BC

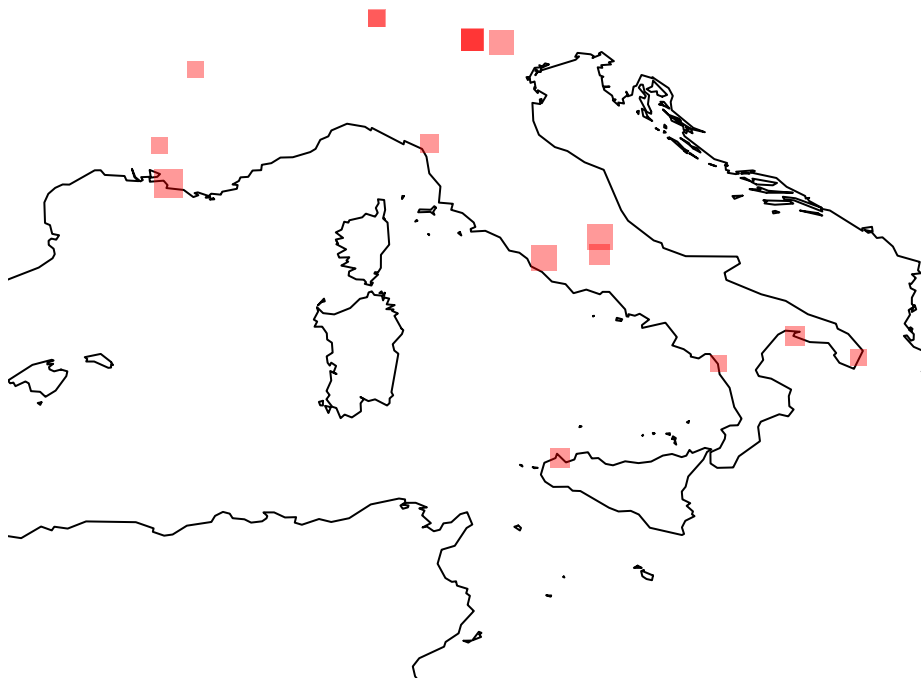

8320 cal. BC

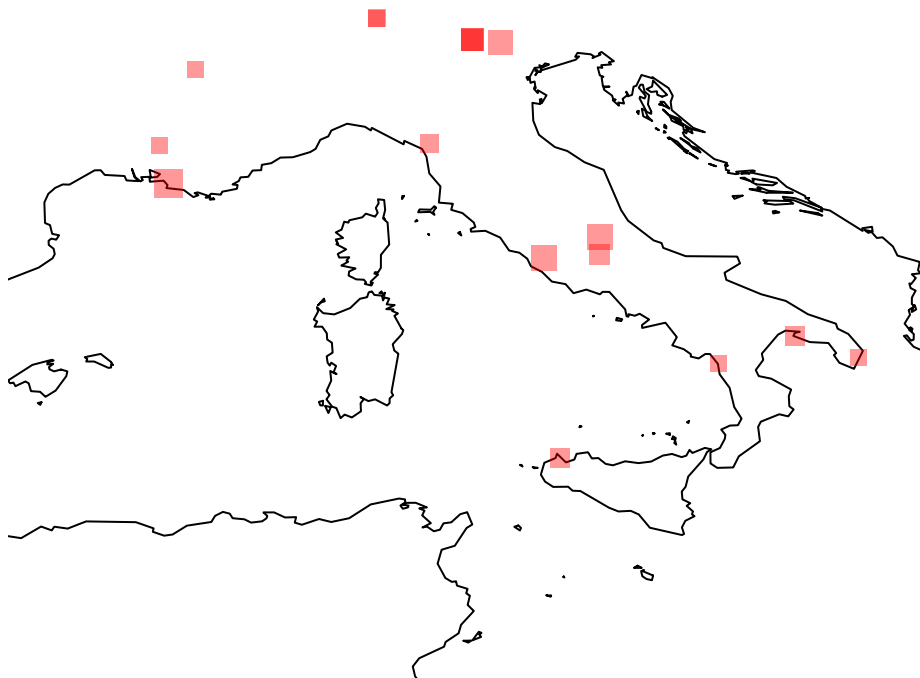

8315 cal. BC

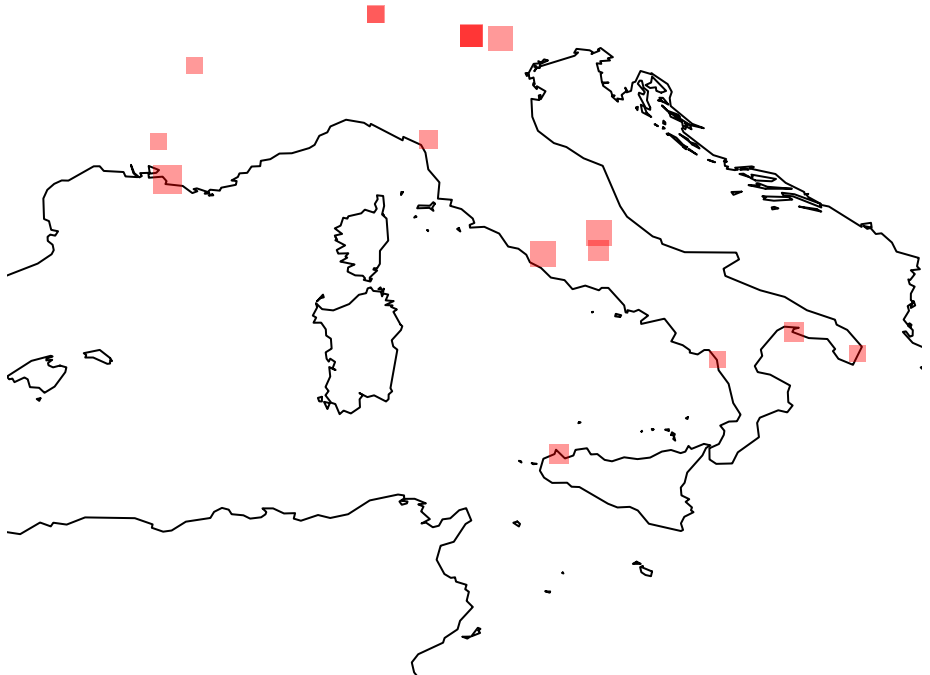

8310 cal. BC

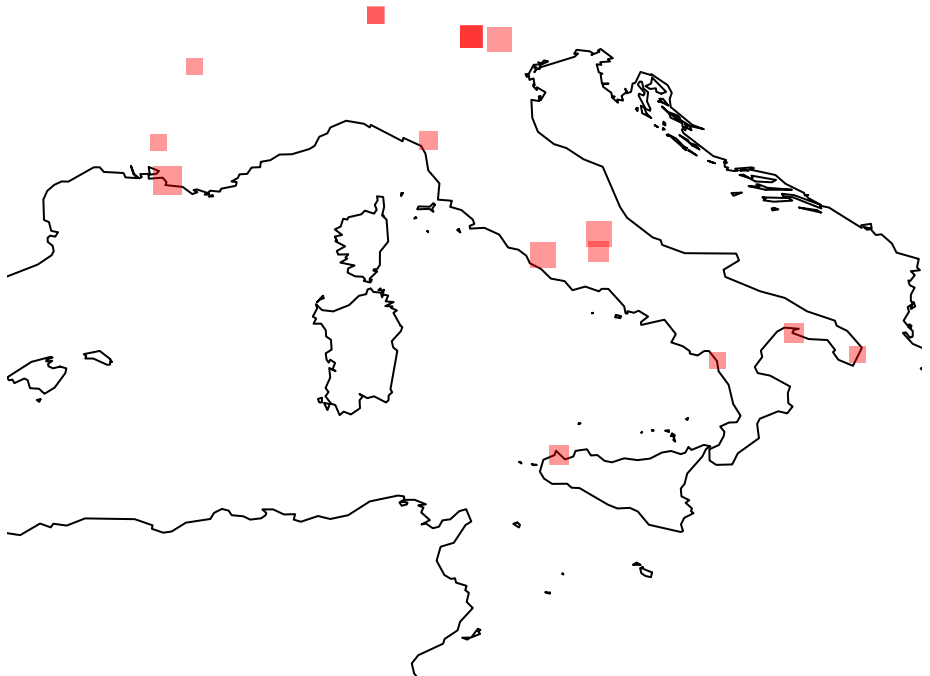

8305 cal. BC

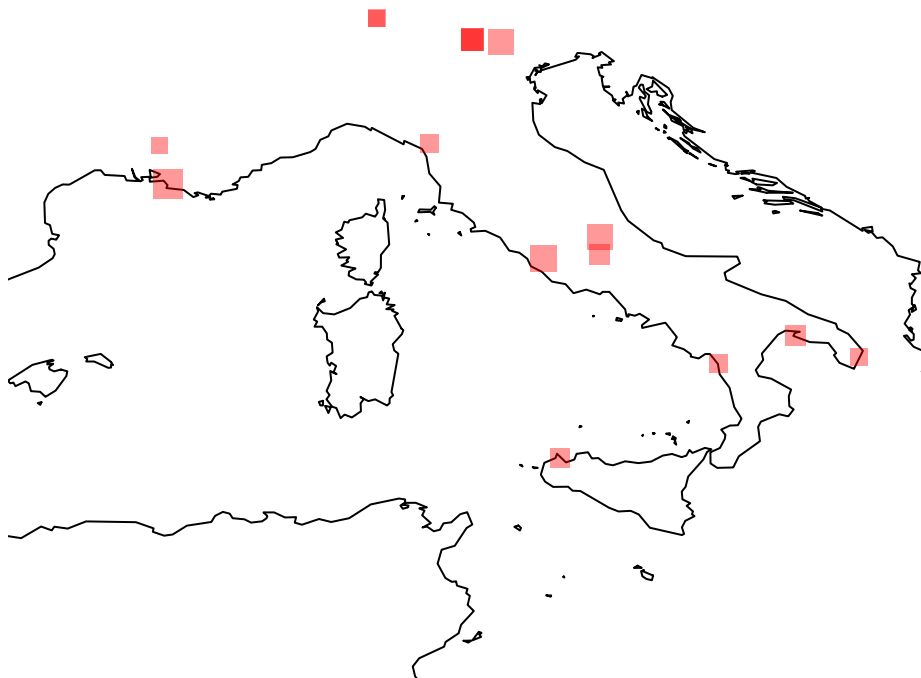

8300 cal. BC

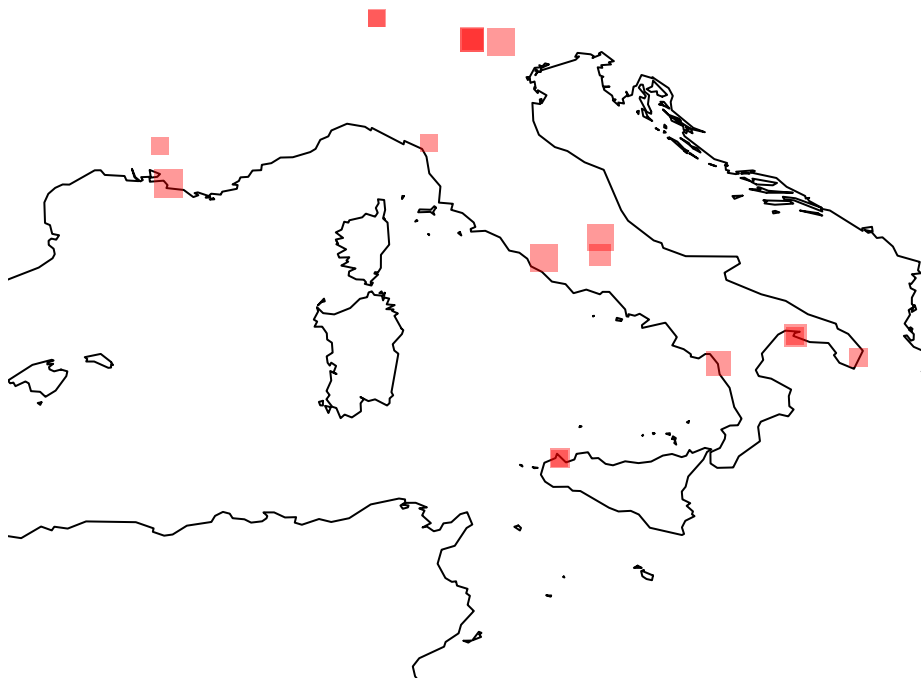

8295 cal. BC

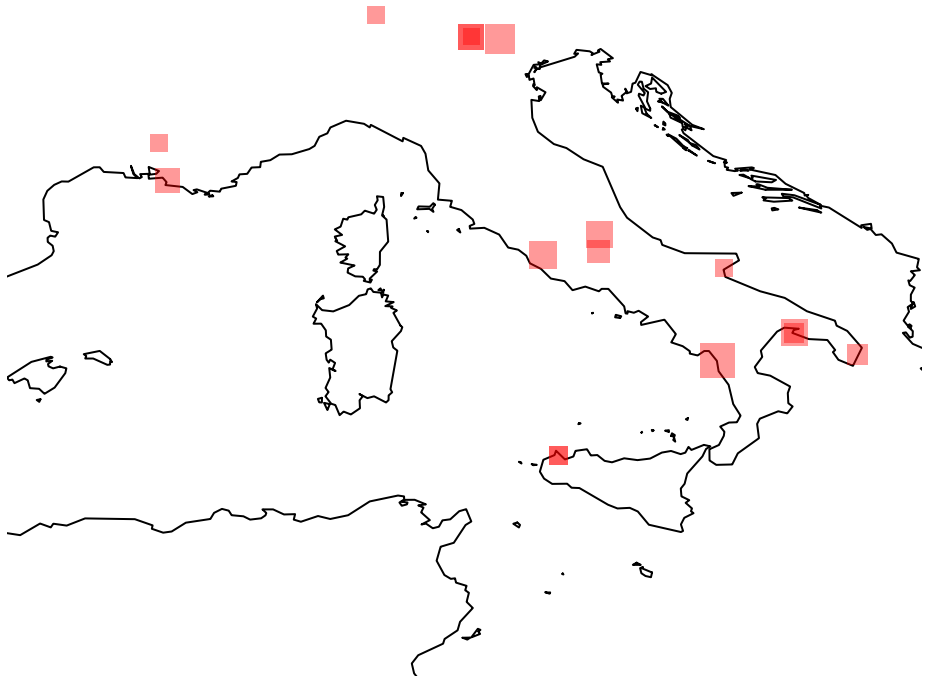

8290 cal. BC

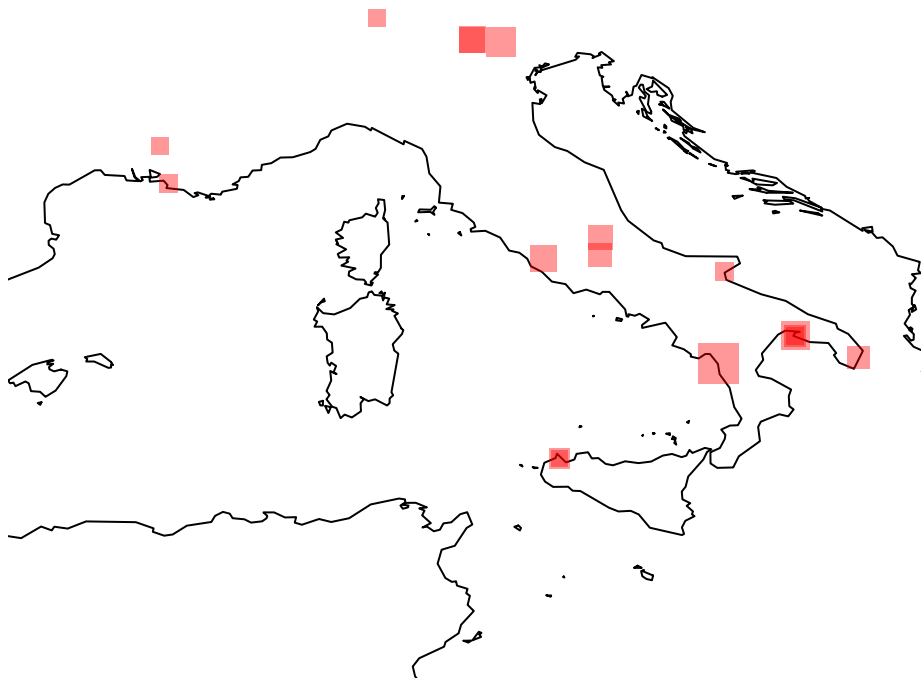



8285 cal. BC

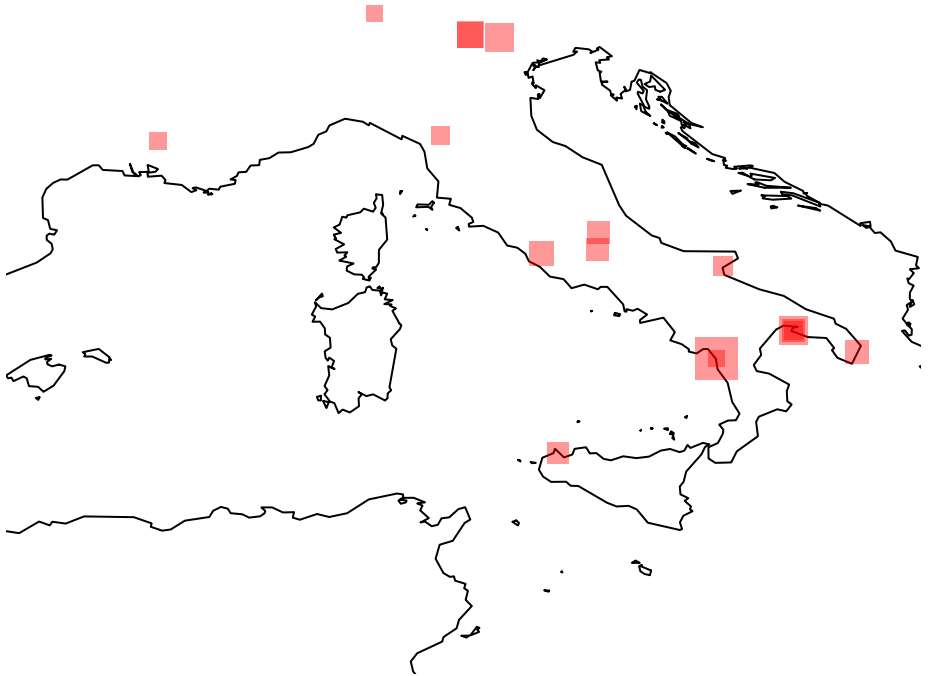

8280 cal. BC

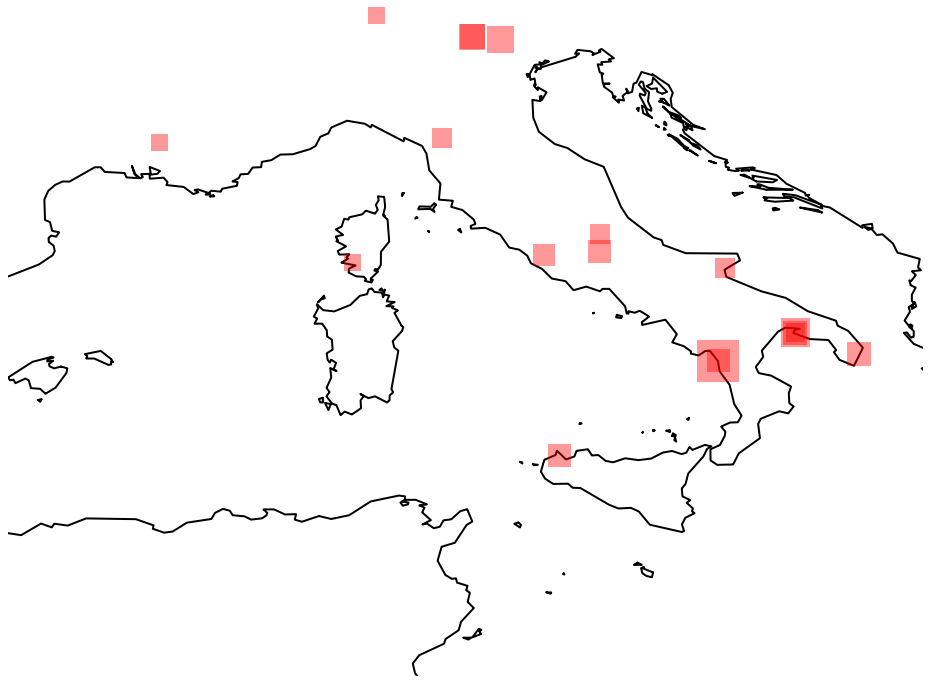

8275 cal. BC

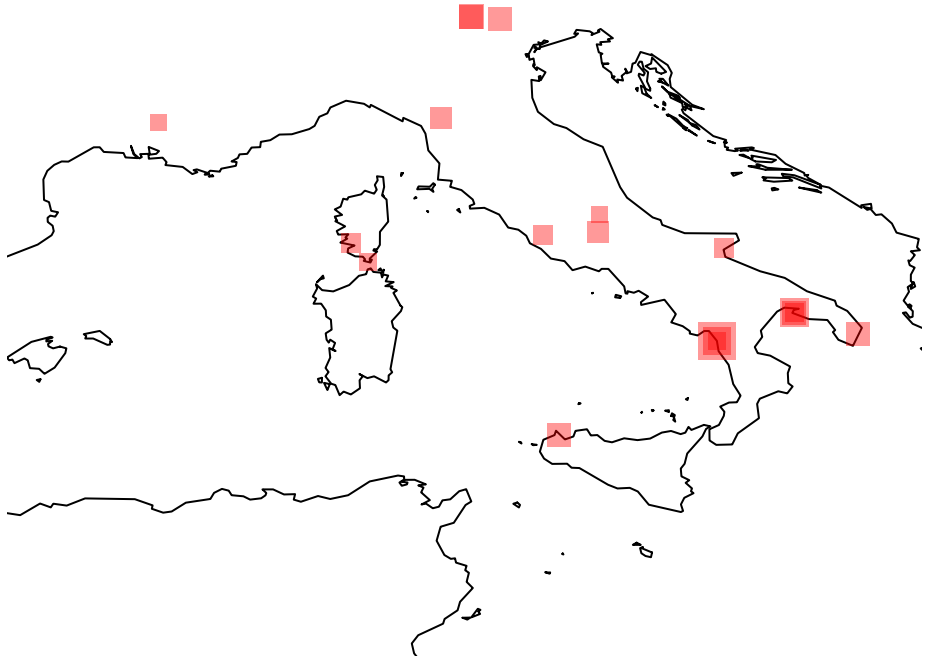

8270 cal. BC

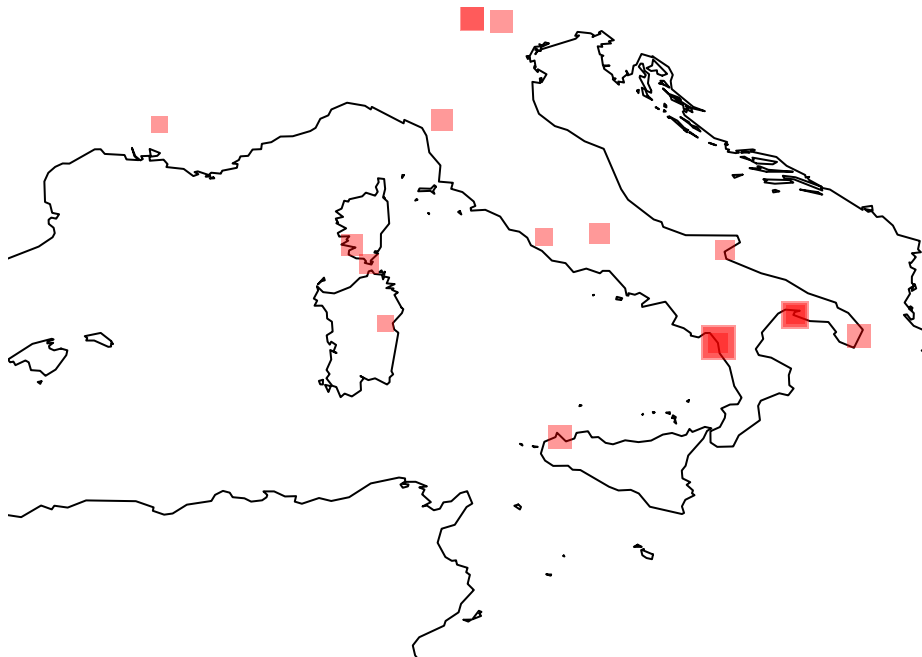

8265 cal. BC

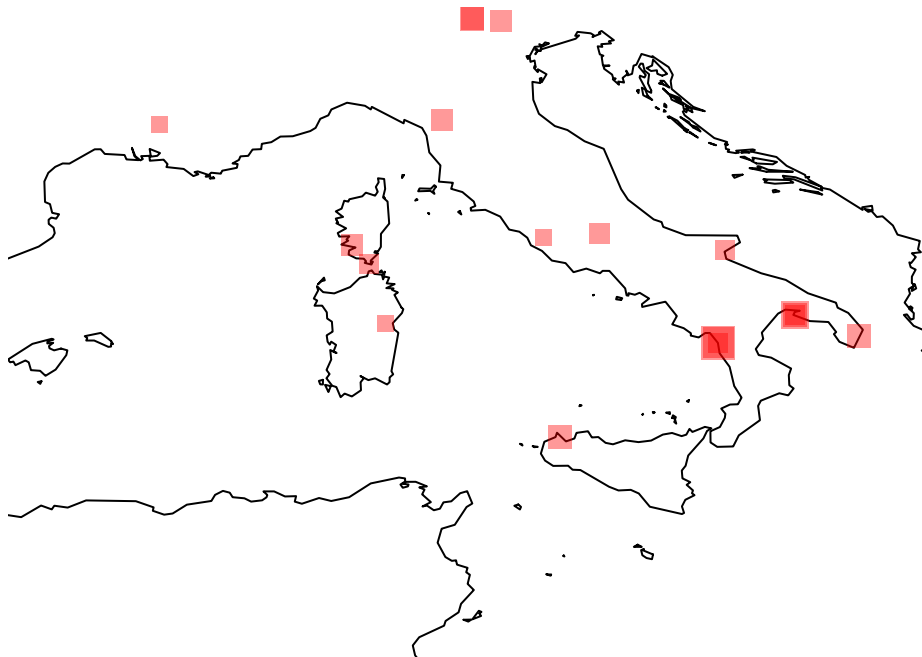

8260 cal. BC

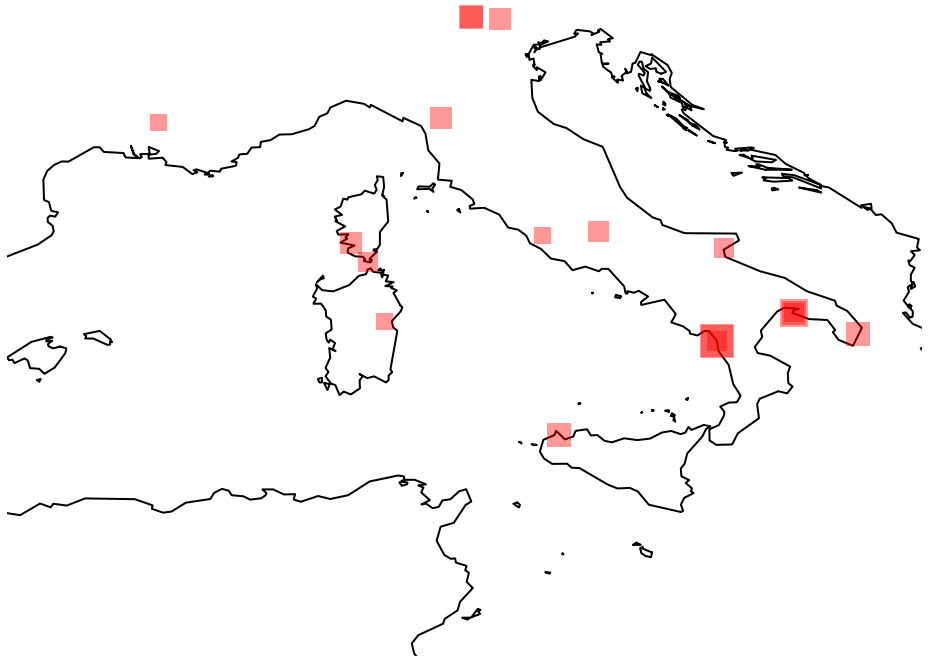

8255 cal. BC

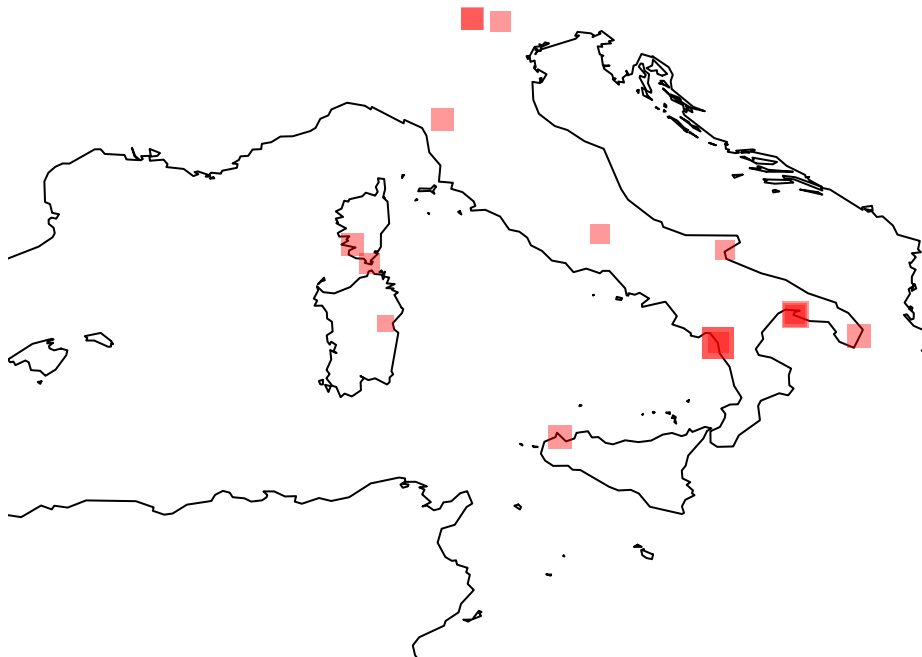

8250 cal. BC

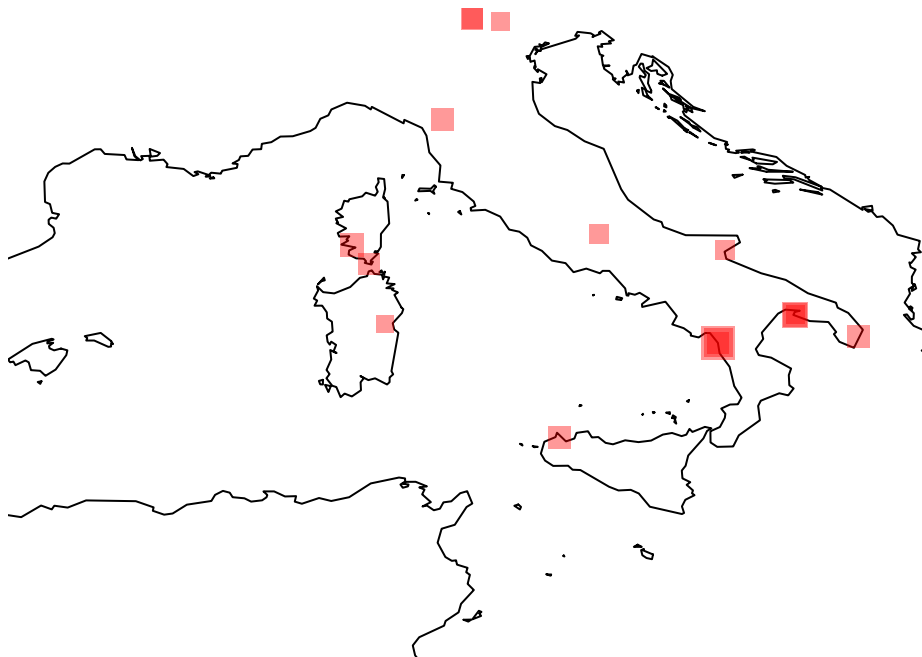



8245 cal. BC

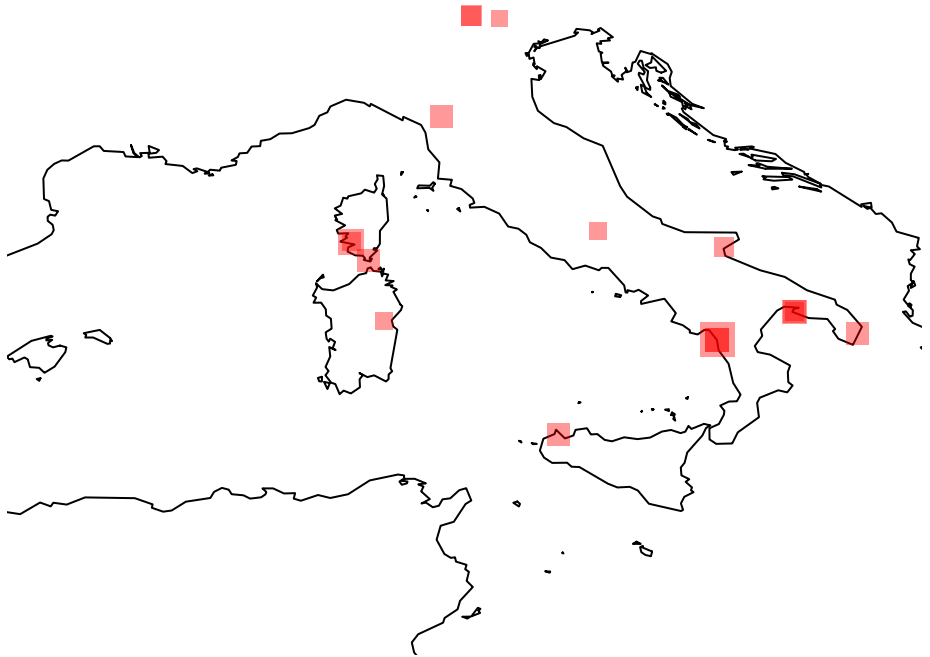

8240 cal. BC

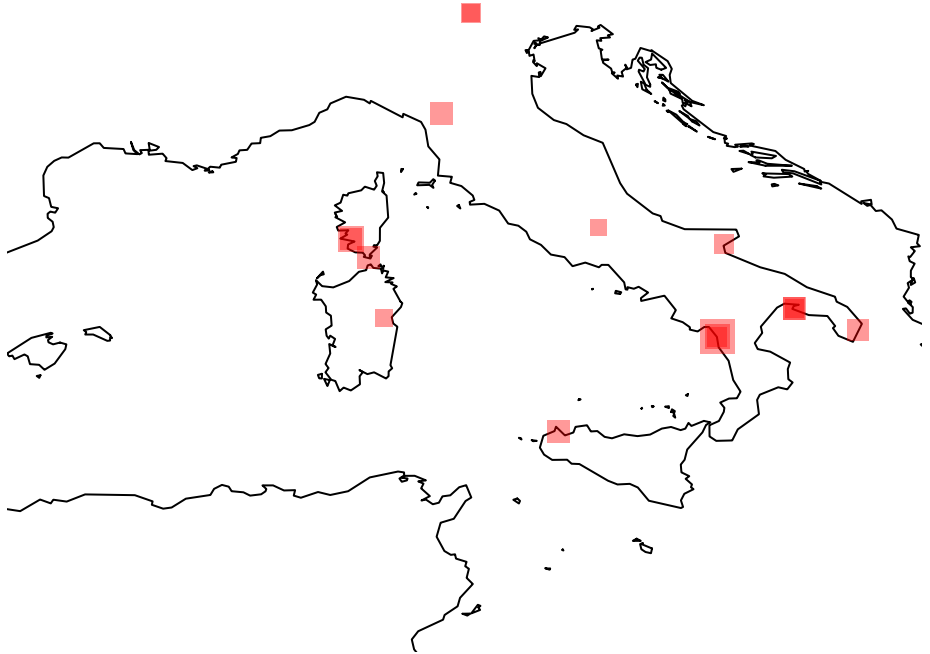

8235 cal. BC

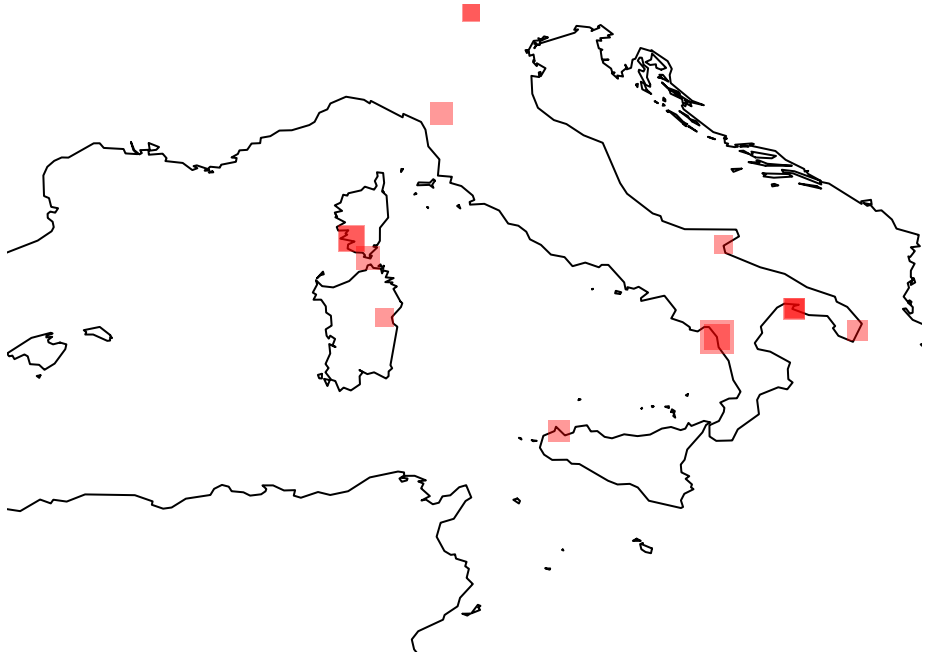

8230 cal. BC

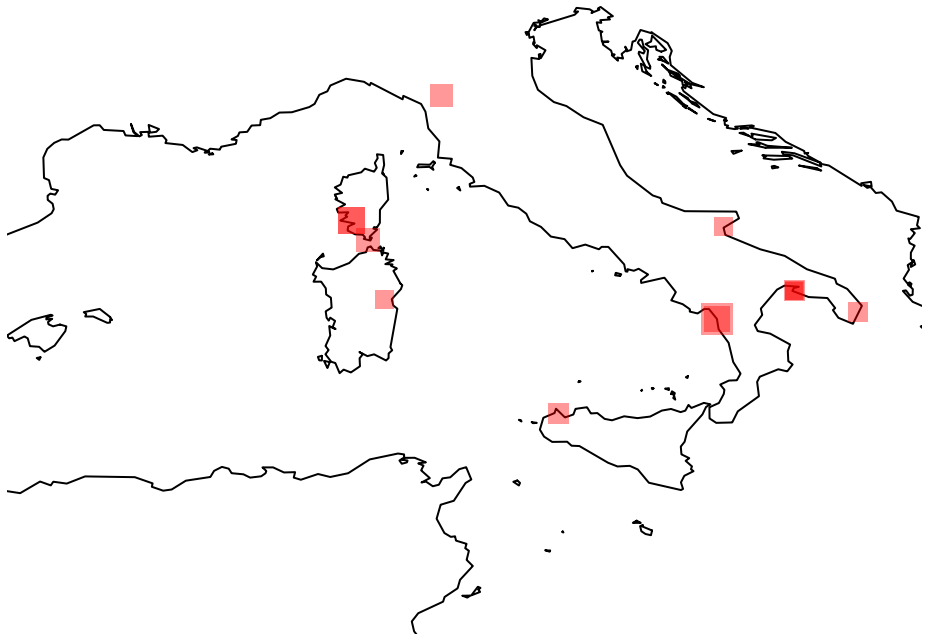

8225 cal. BC

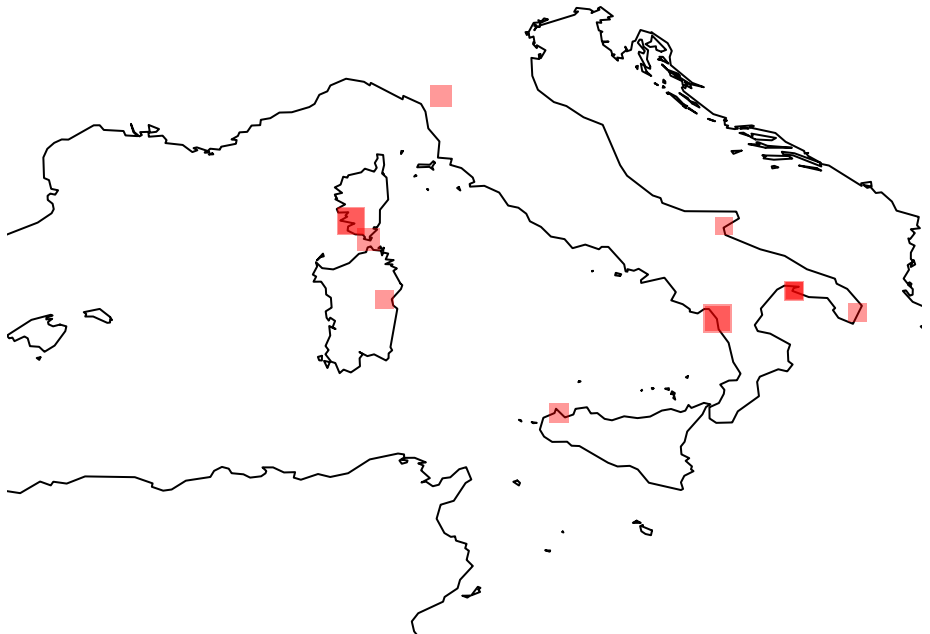

8220 cal. BC

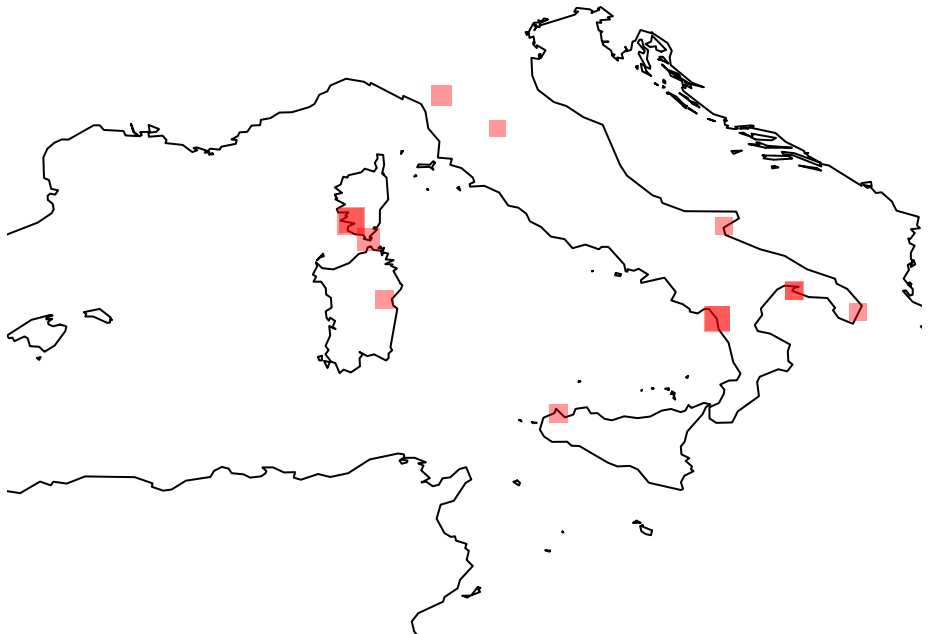



8210 cal. BC

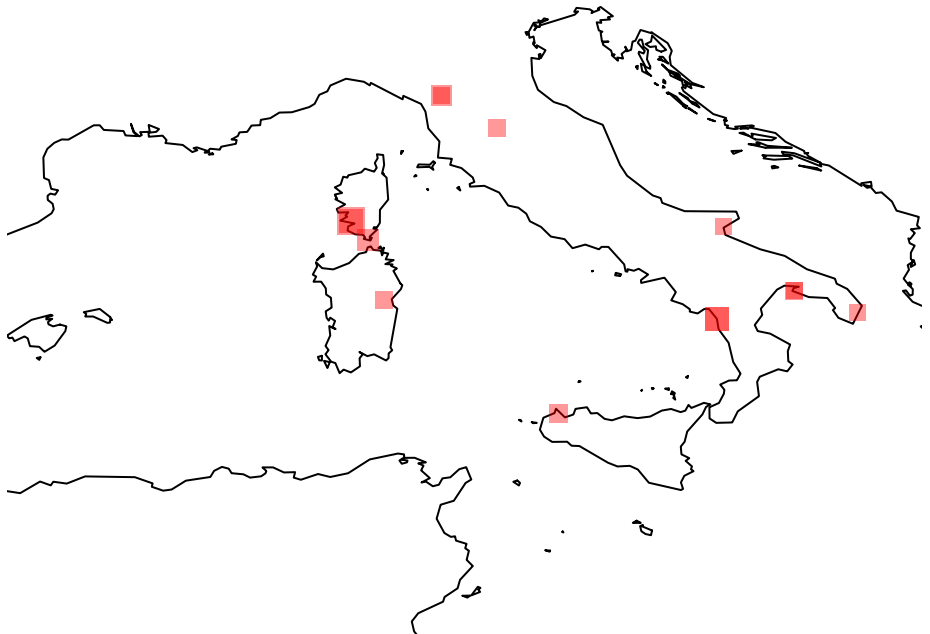



8205 cal. BC

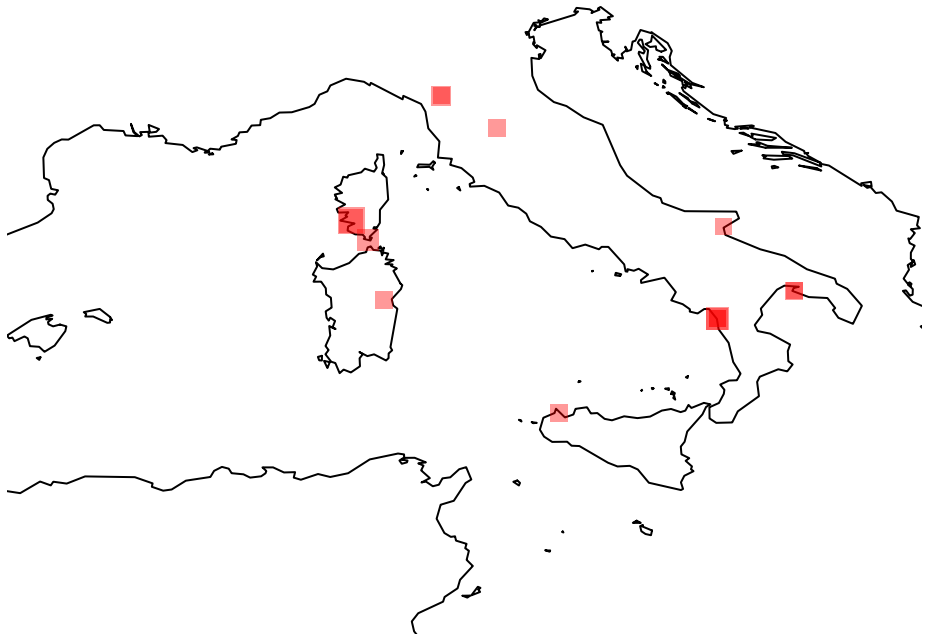

8200 cal. BC

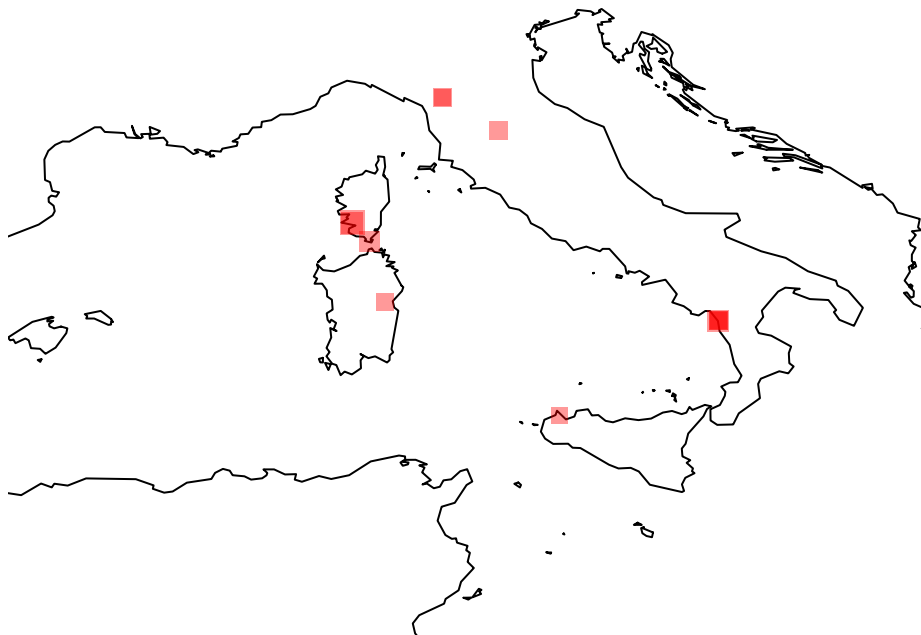

8195 cal. BC

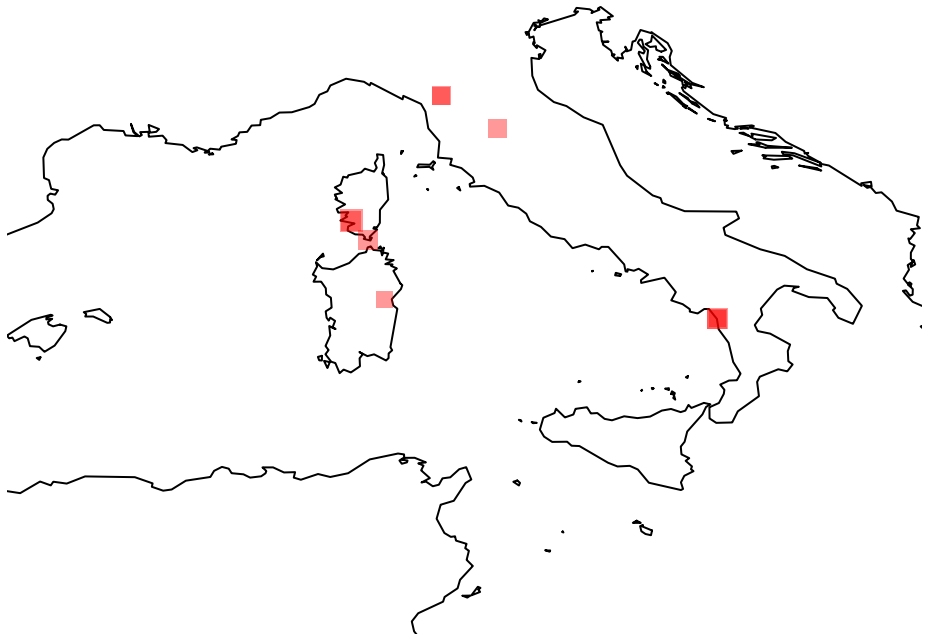

8190 cal. BC

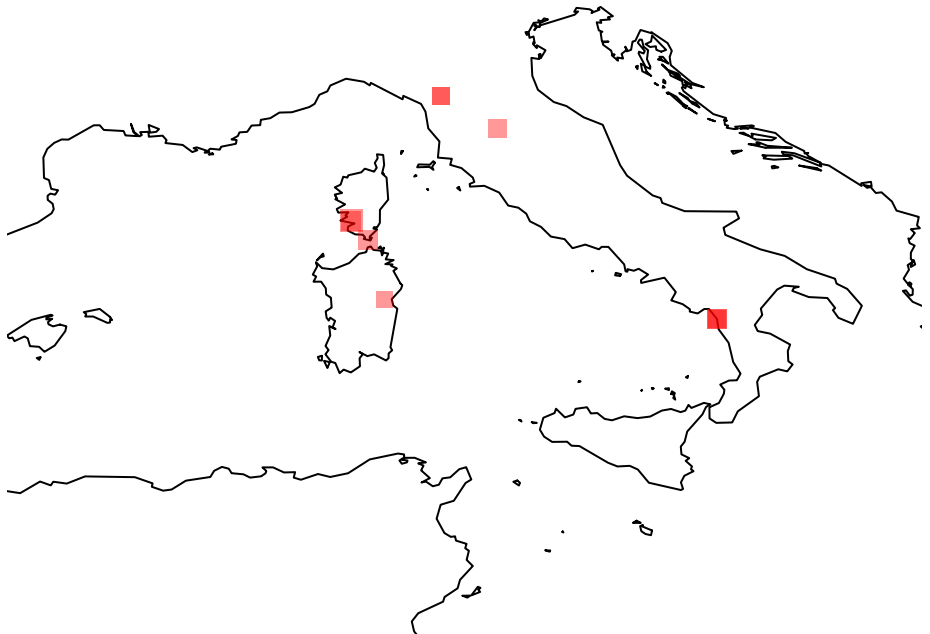

8185 cal. BC



8180 cal. BC



8175 cal. BC

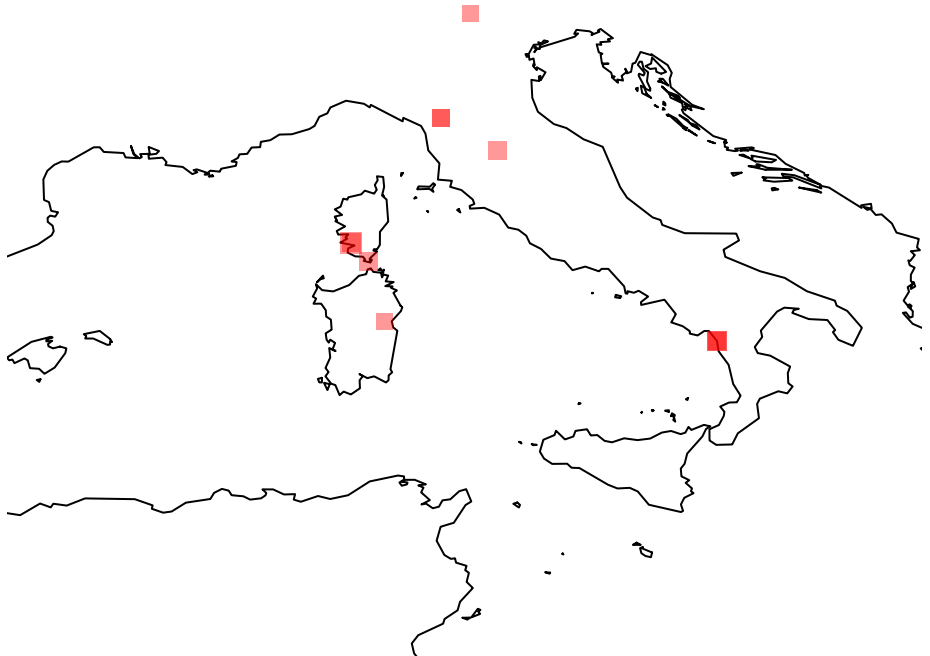

8170 cal. BC

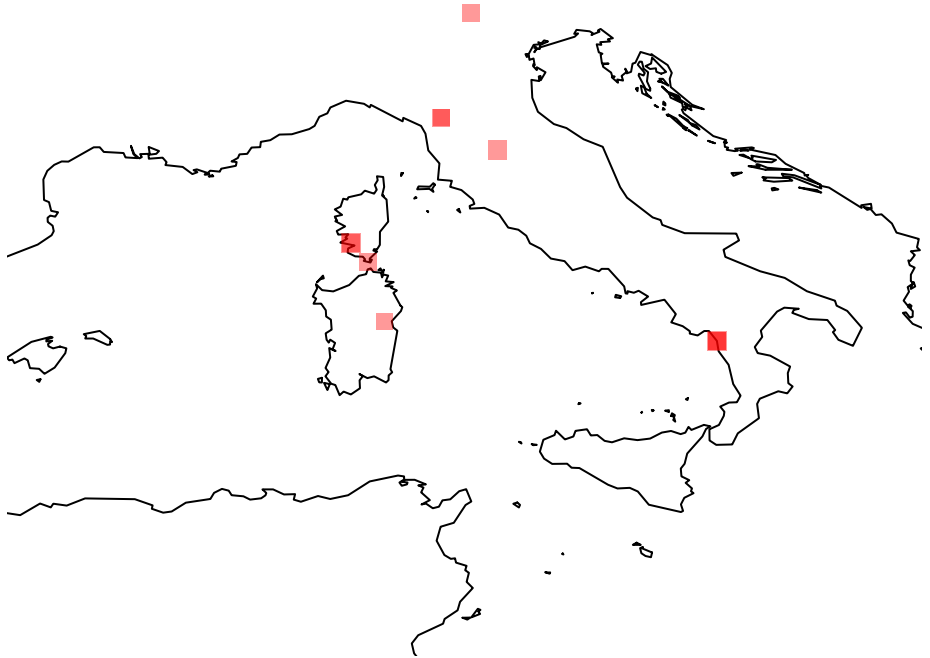



8165 cal. BC

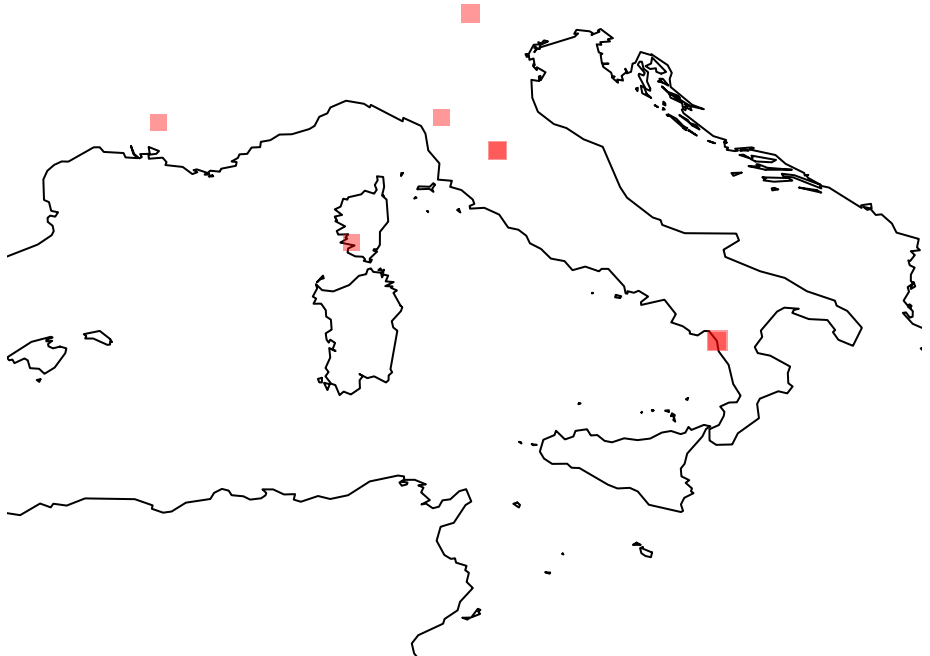

8160 cal. BC

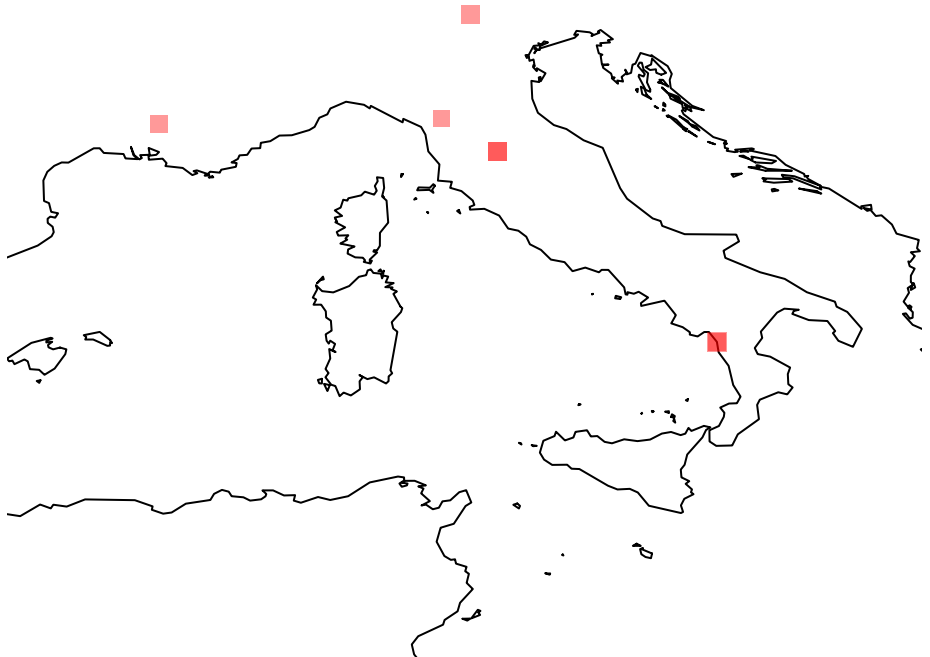

8155 cal. BC

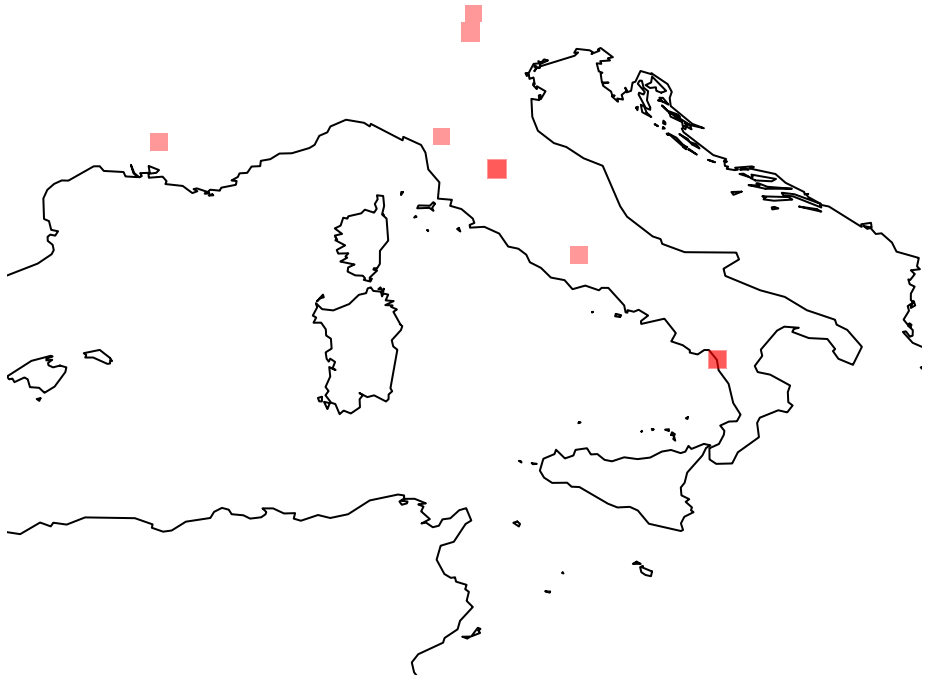

8150 cal. BC

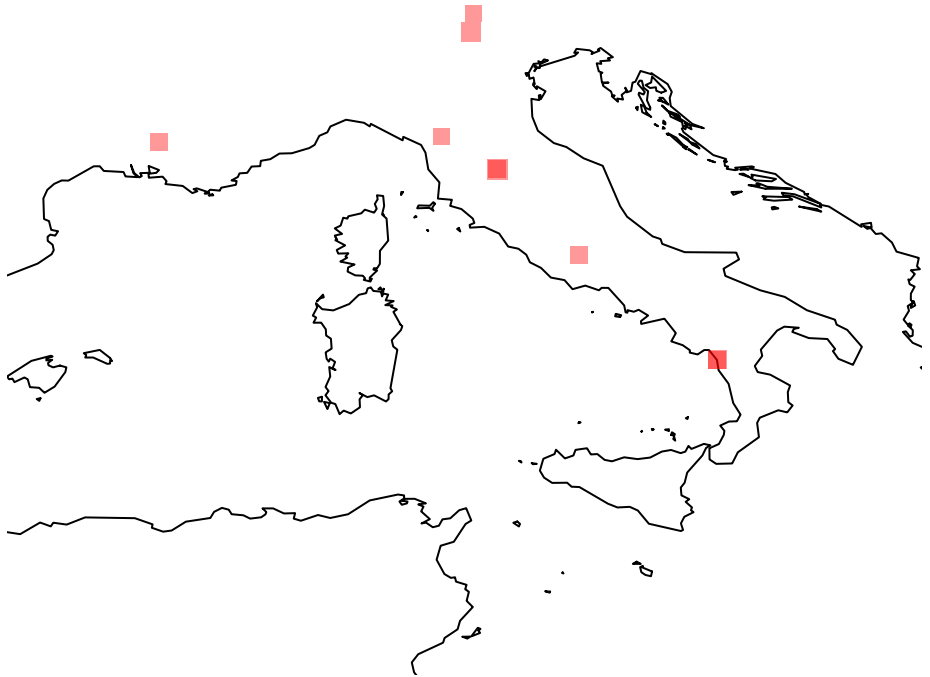

8145 cal. BC

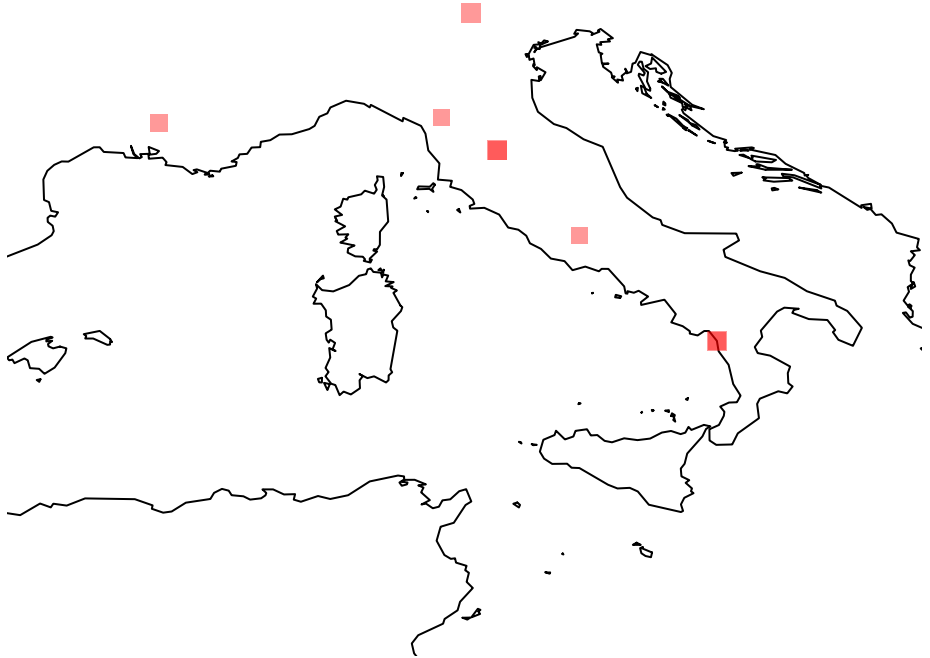

8140 cal. BC

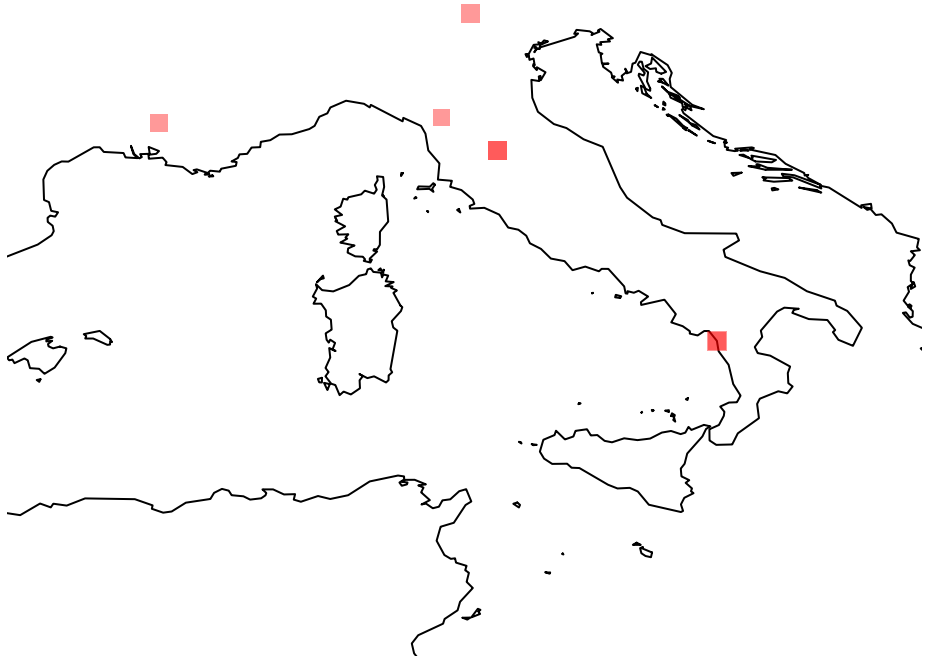

8135 cal. BC



8130 cal. BC





8125 cal. BC

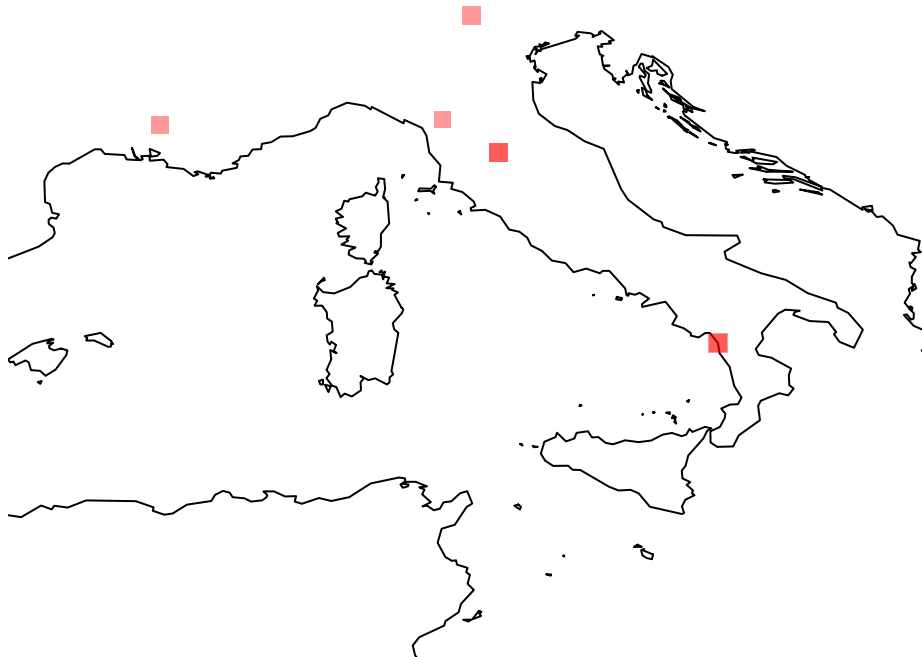

8120 cal. BC

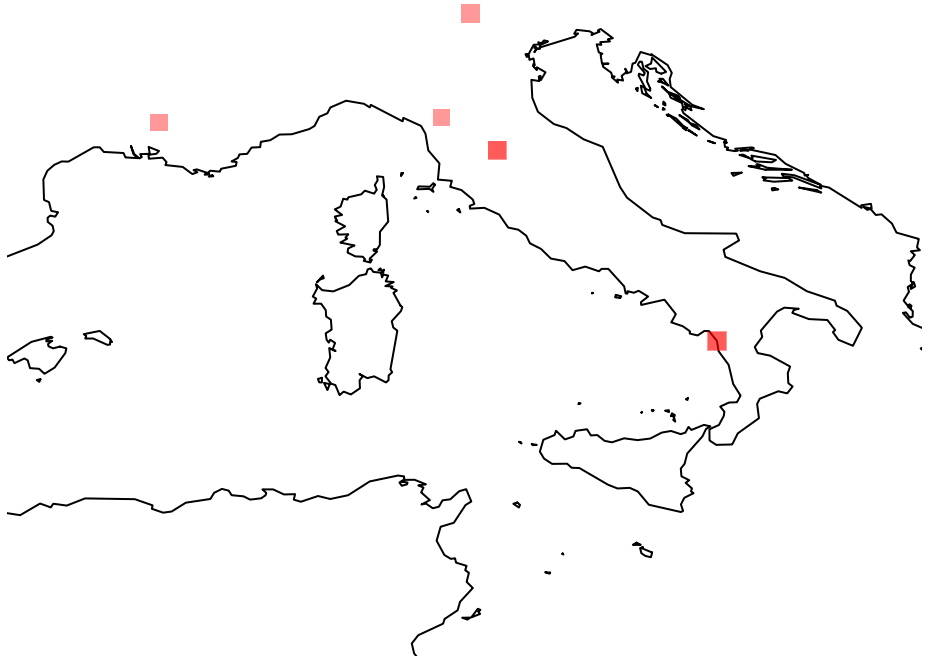

8115 cal. BC

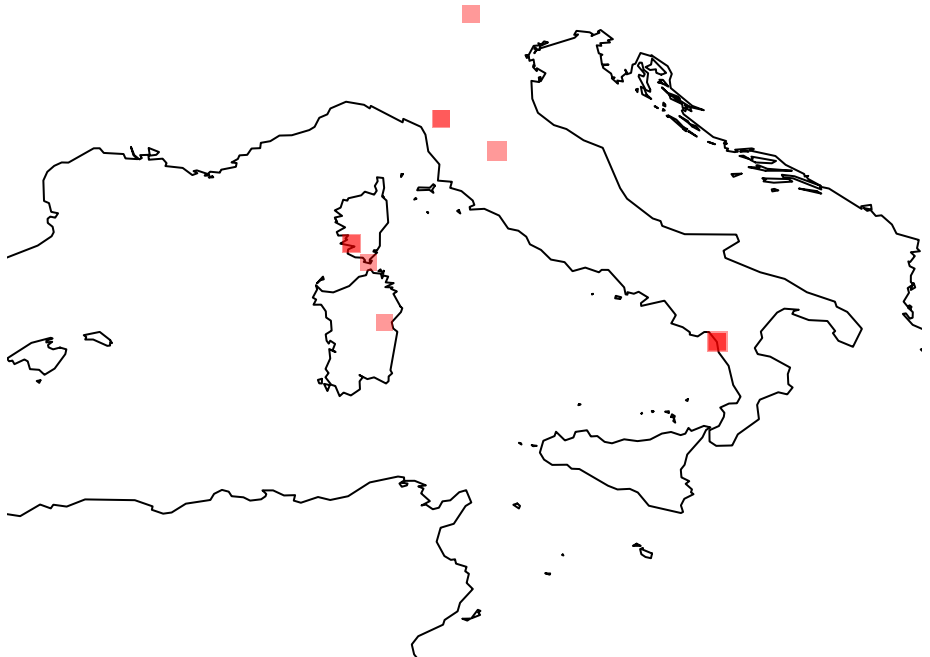

8110 cal. BC



8105 cal. BC

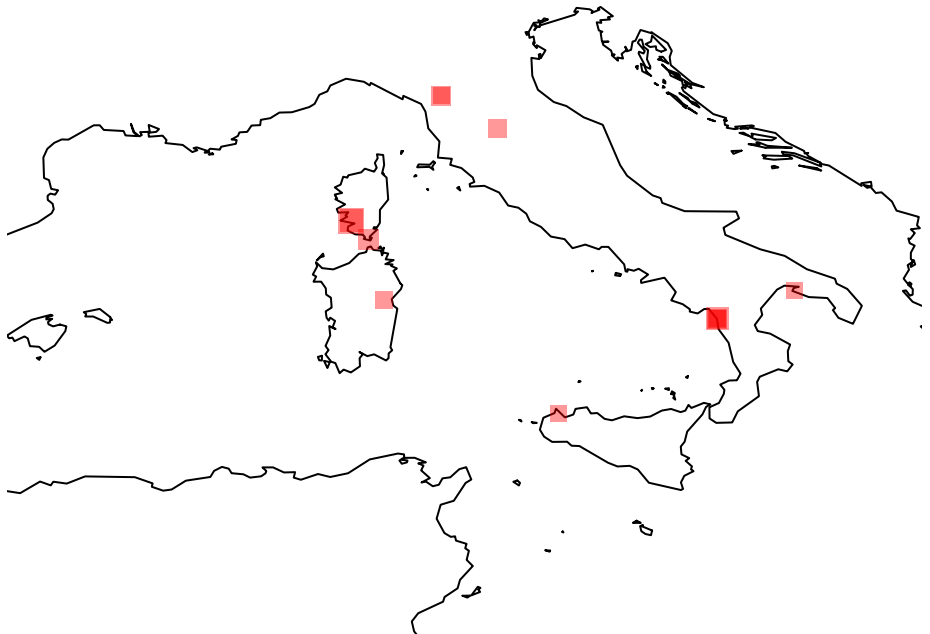

8100 cal. BC

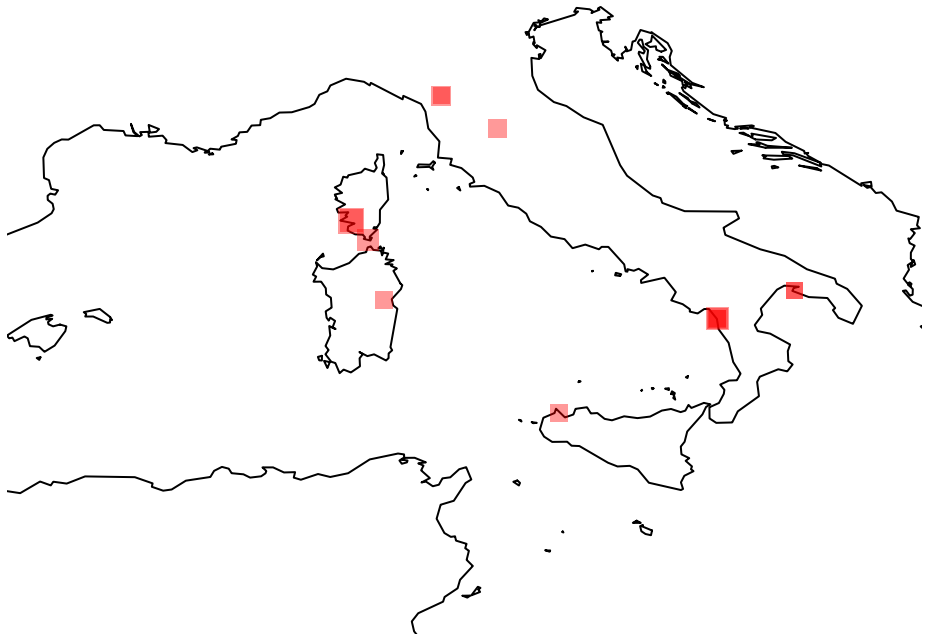

8095 cal. BC

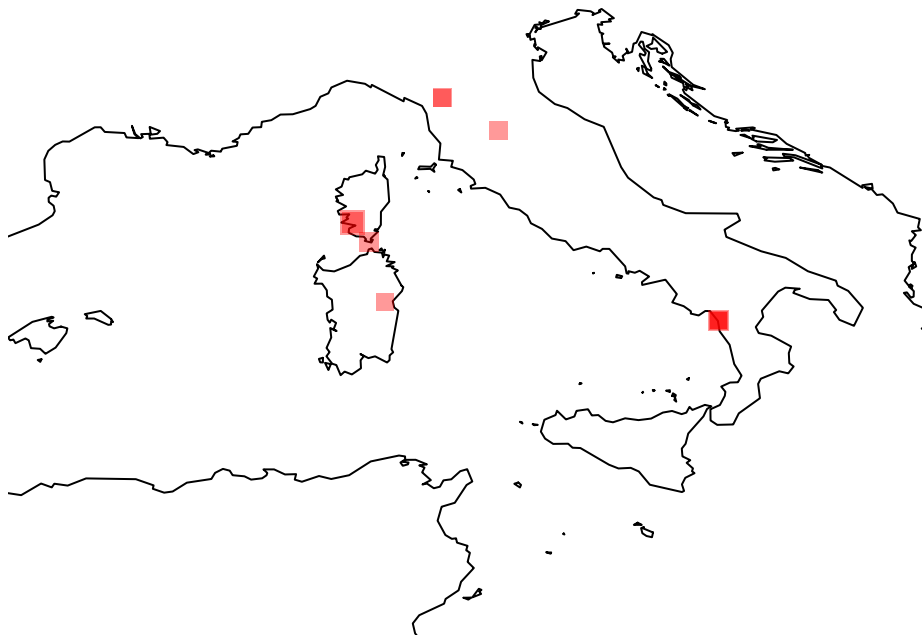

8090 cal. BC

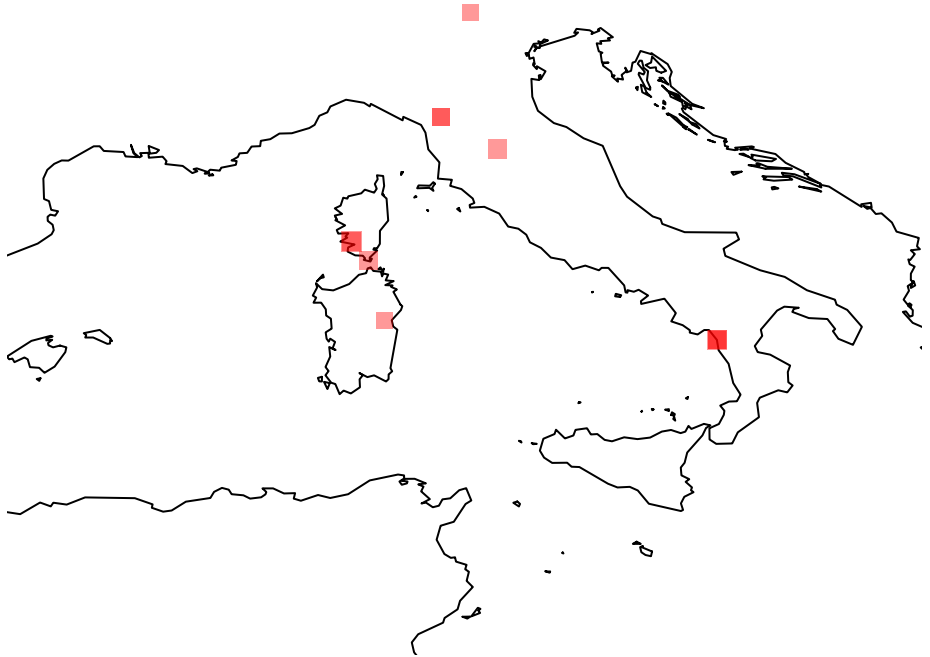



8085 cal. BC

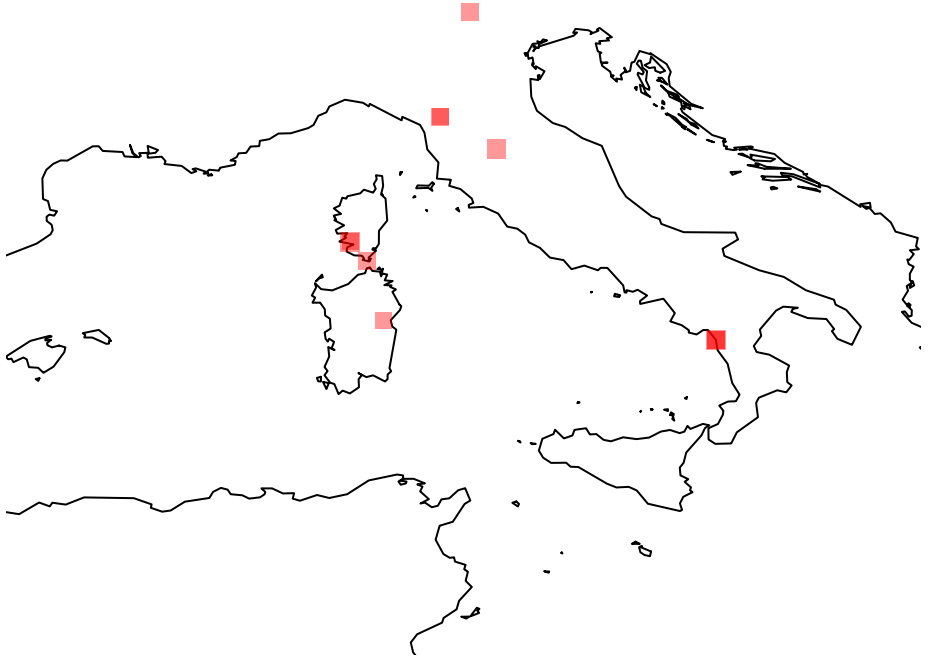

8080 cal. BC

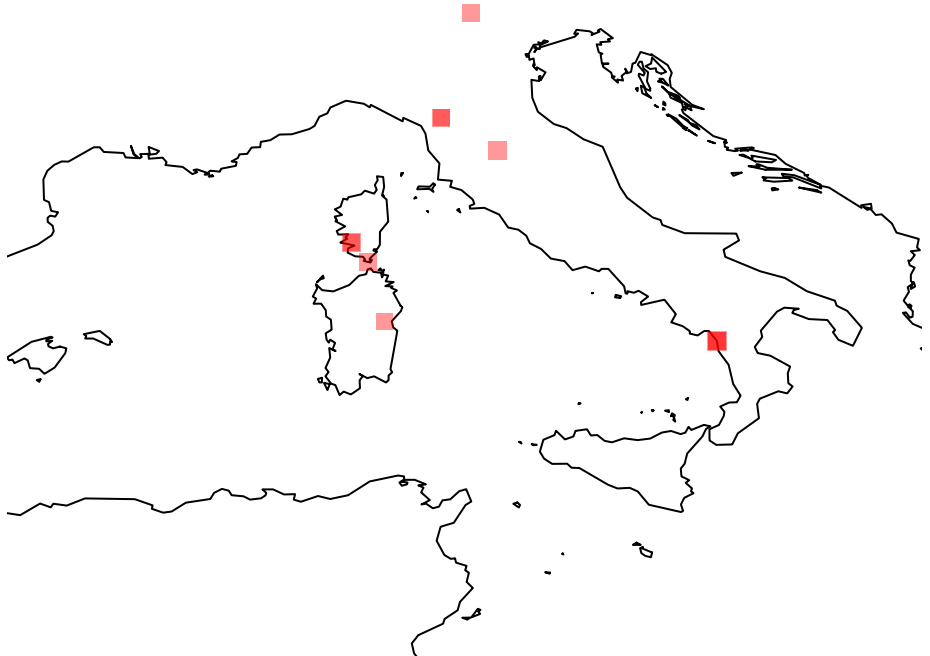

8075 cal. BC

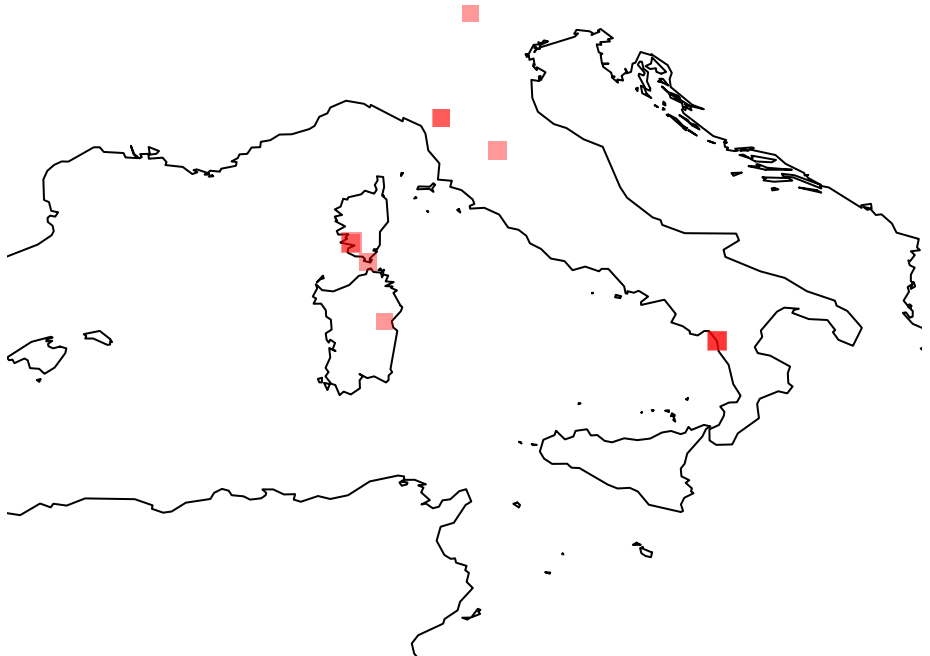

8070 cal. BC



8065 cal. BC

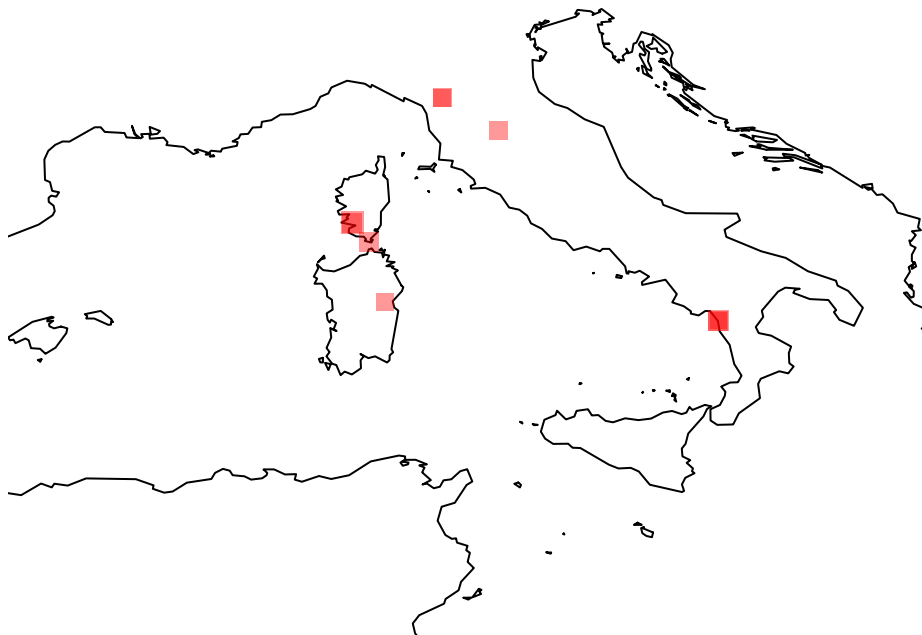

8060 cal. BC



8055 cal. BC

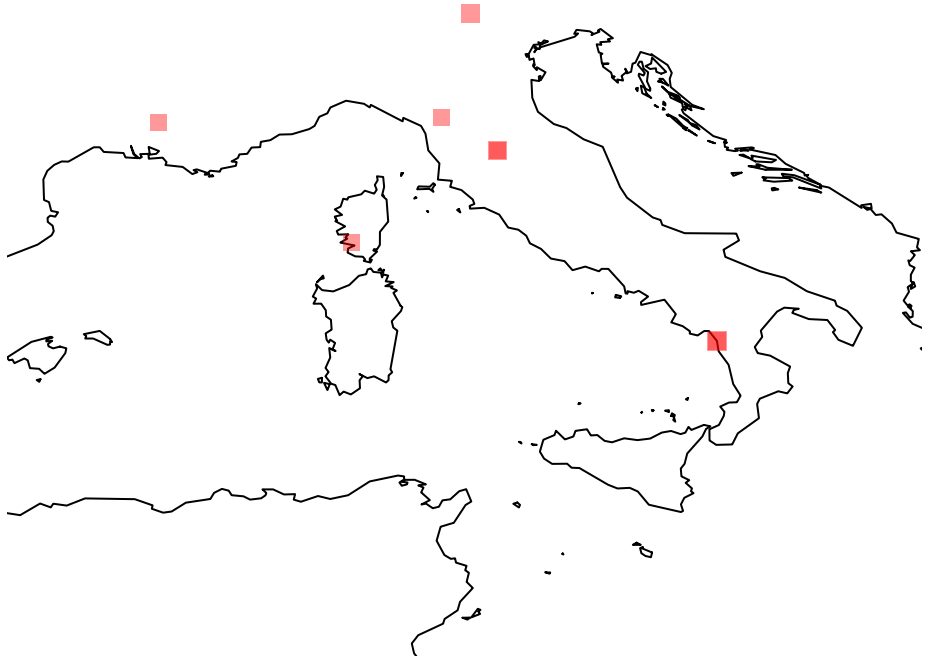

8050 cal. BC

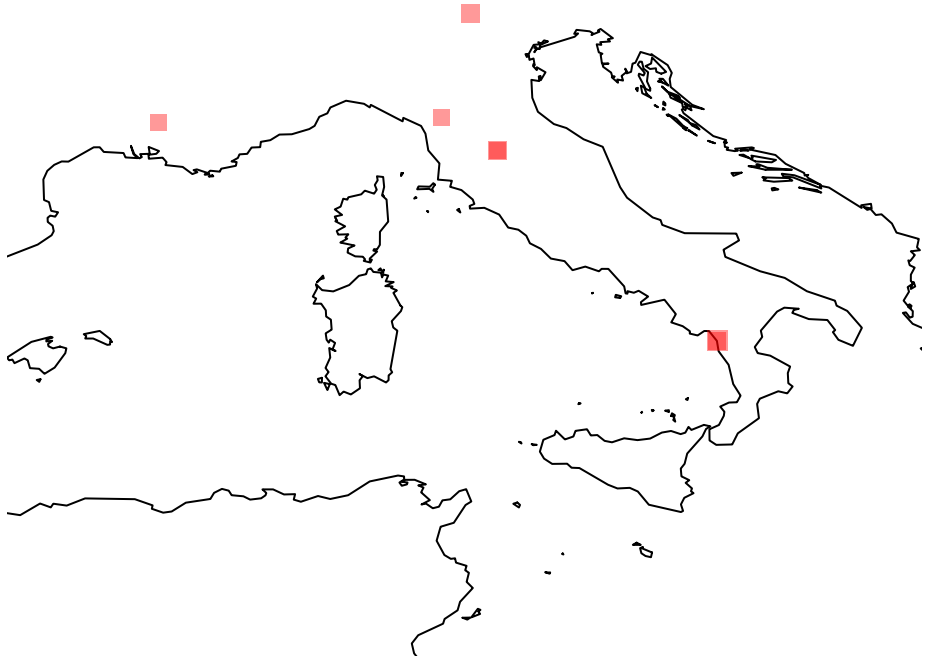



8045 cal. BC

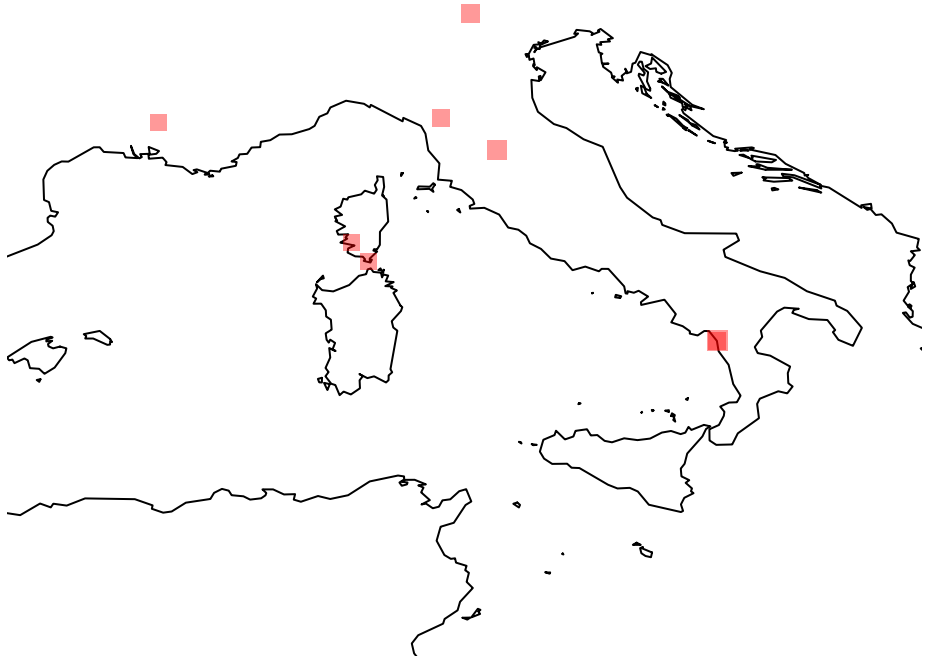

8040 cal. BC

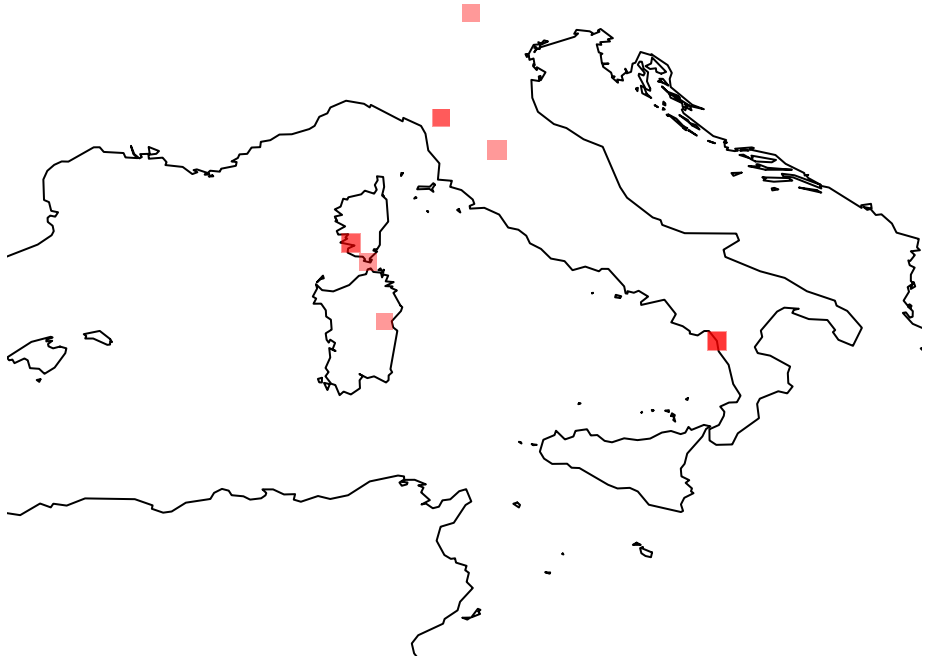

8035 cal. BC

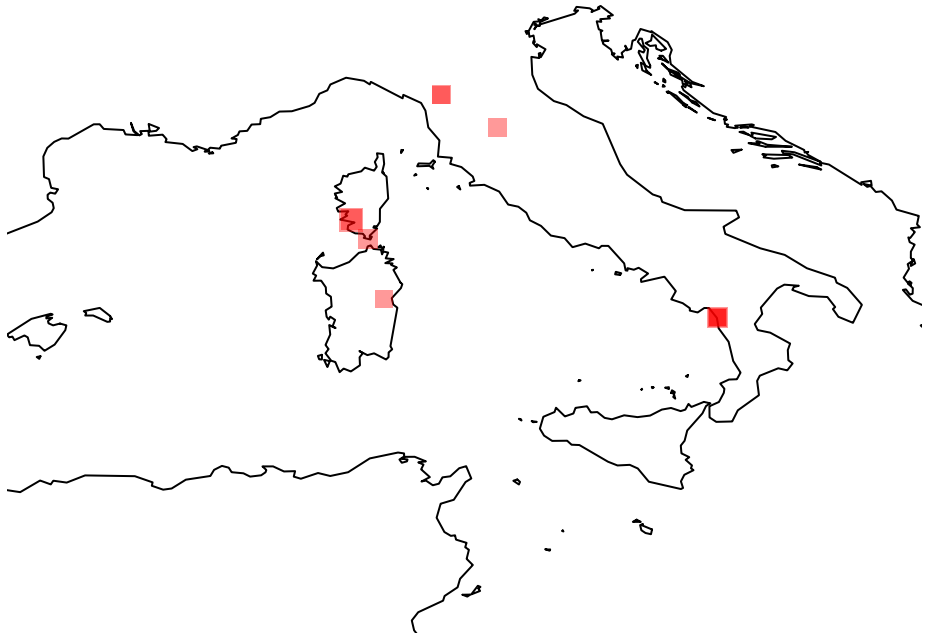

8030 cal. BC

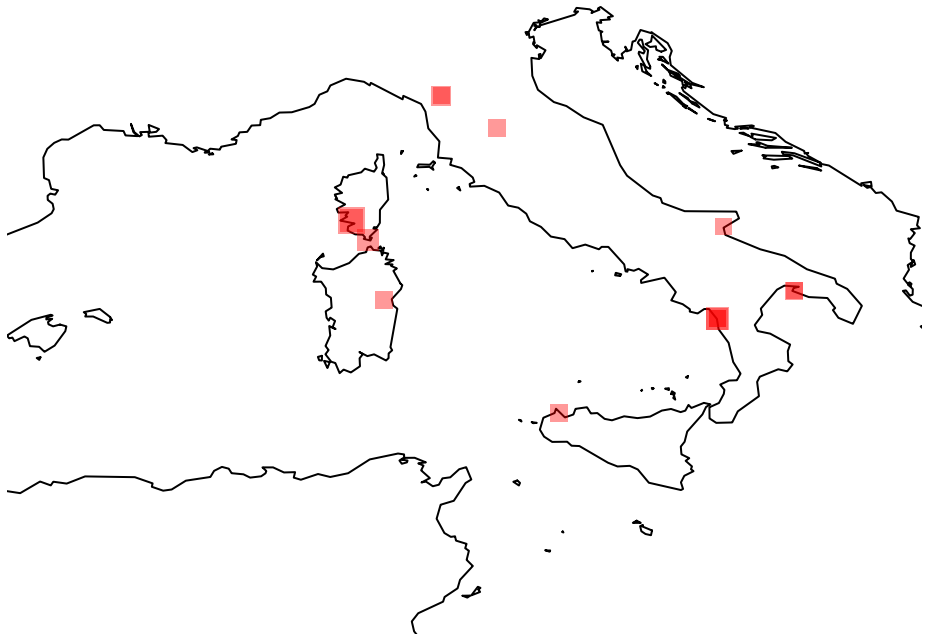



8020 cal. BC



8015 cal. BC

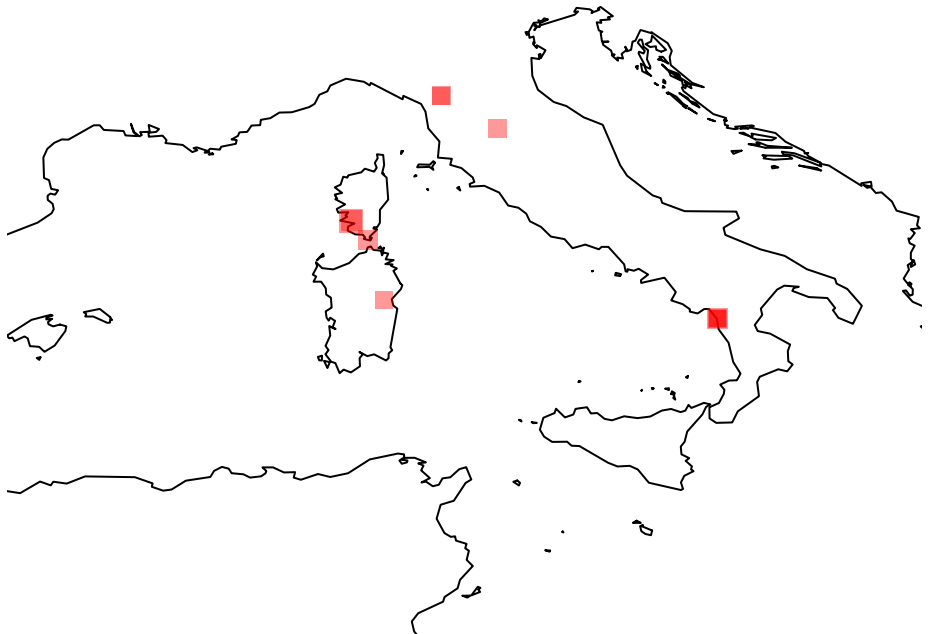

8010 cal. BC

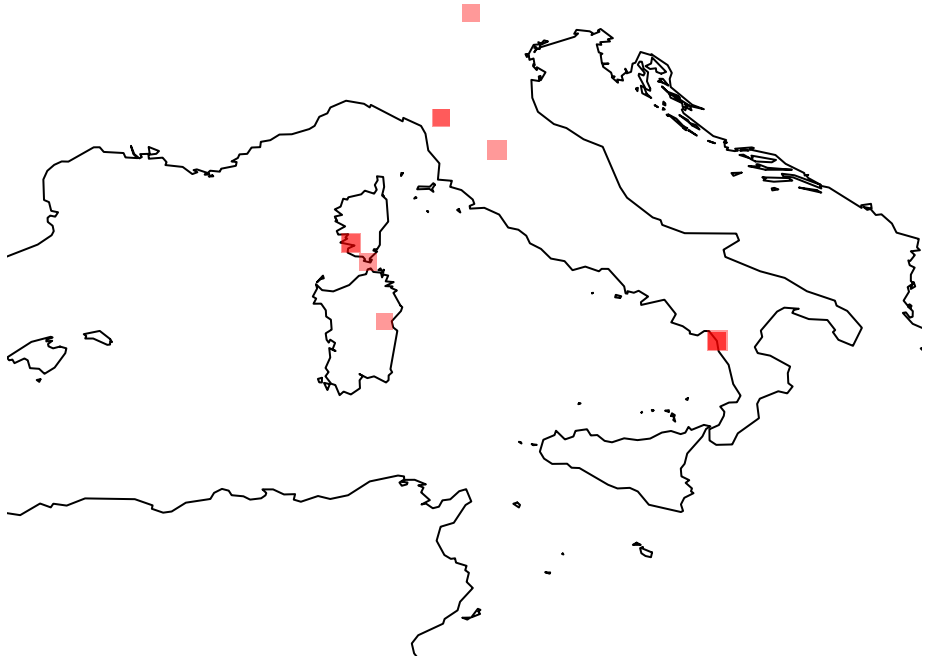



8005 cal. BC

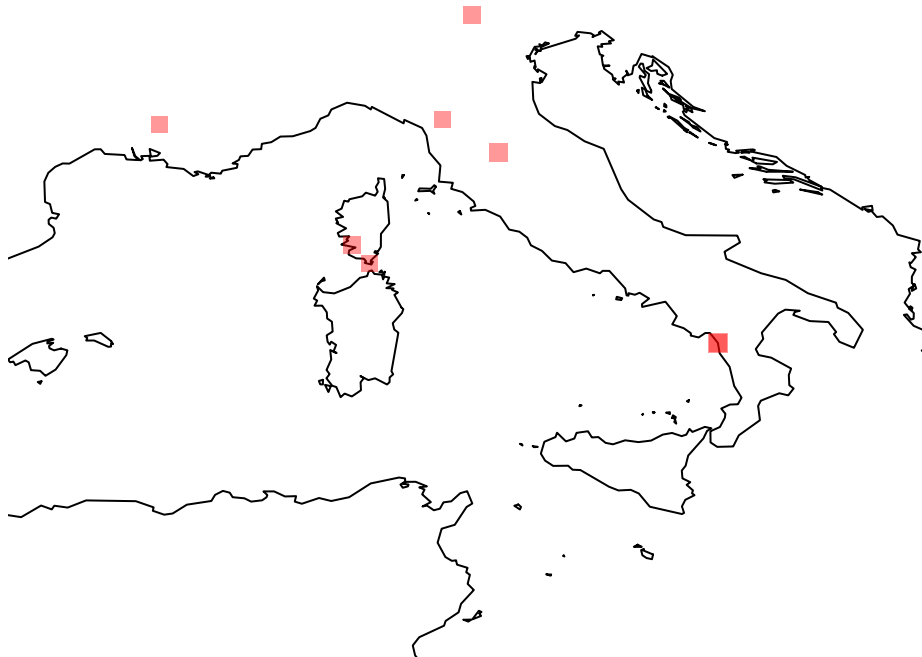

8000 cal. BC

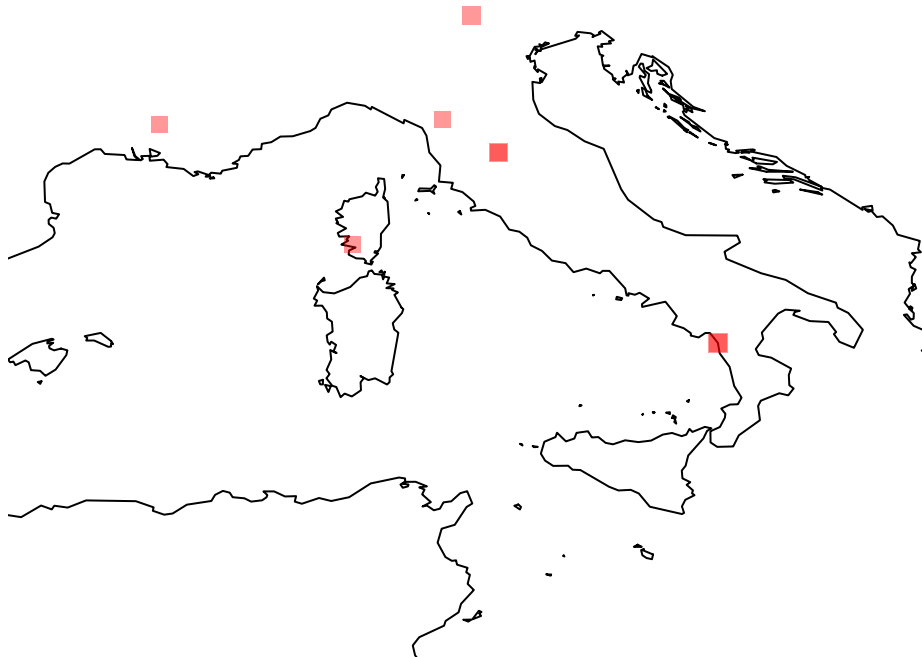

7995 cal. BC

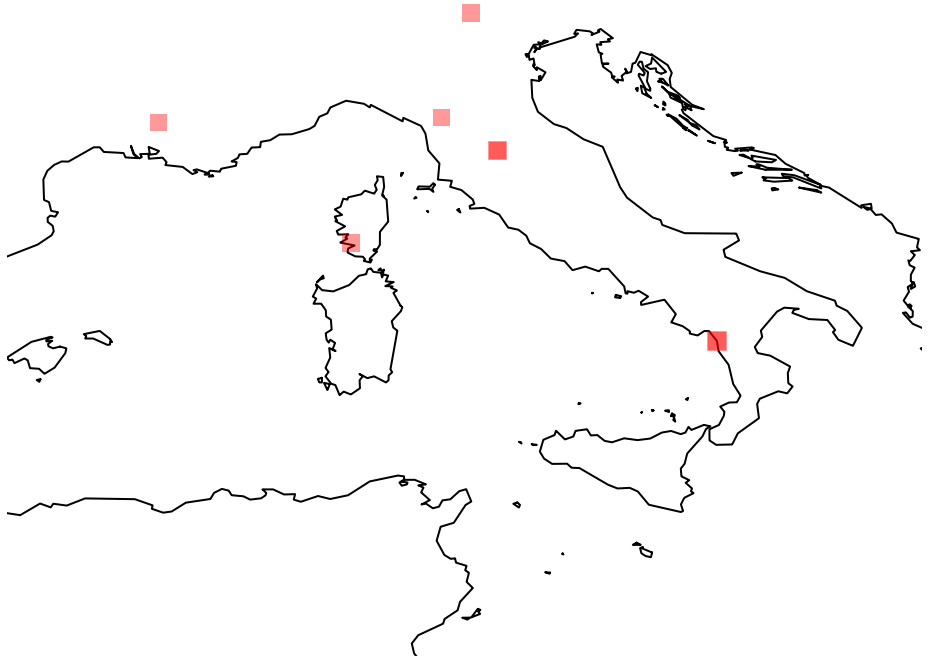

7990 cal. BC

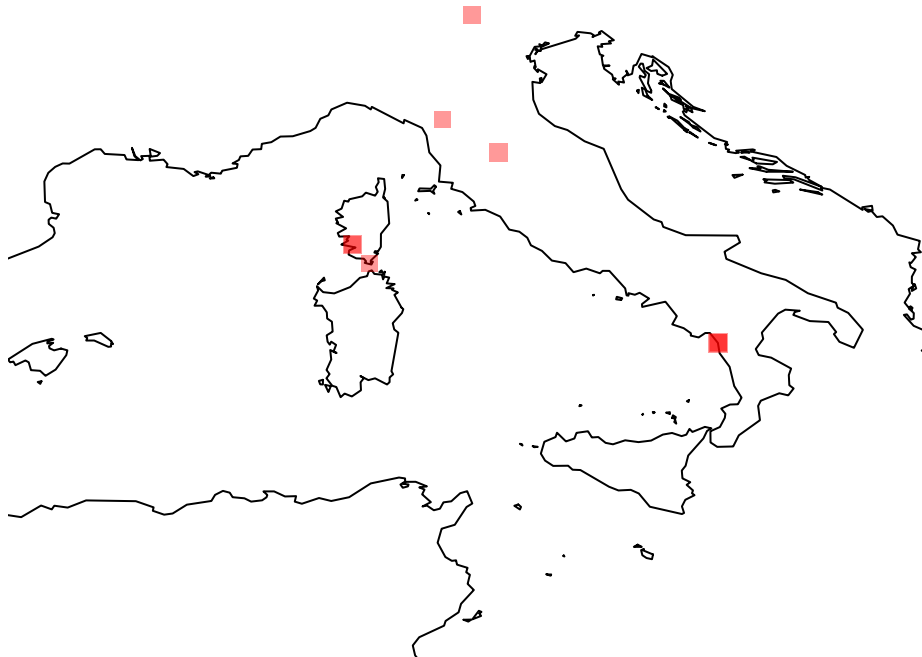

7985 cal. BC

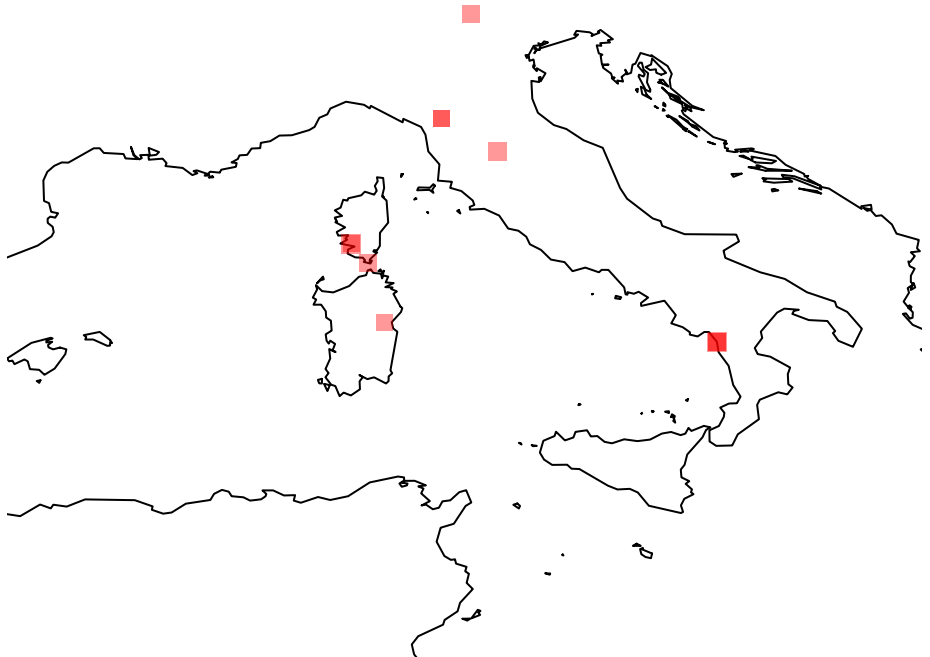

7980 cal. BC

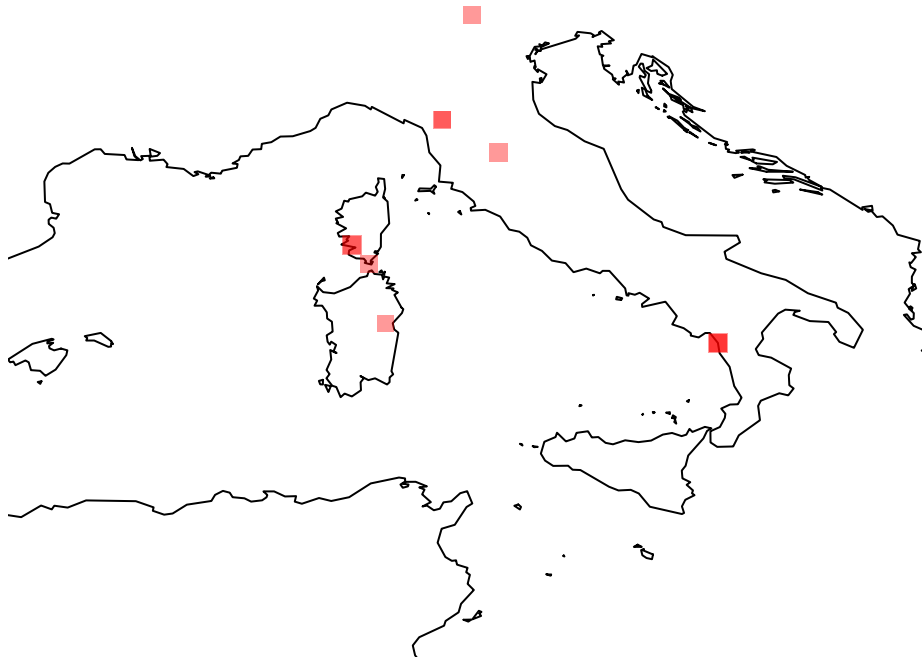

7975 cal. BC



7970 cal. BC

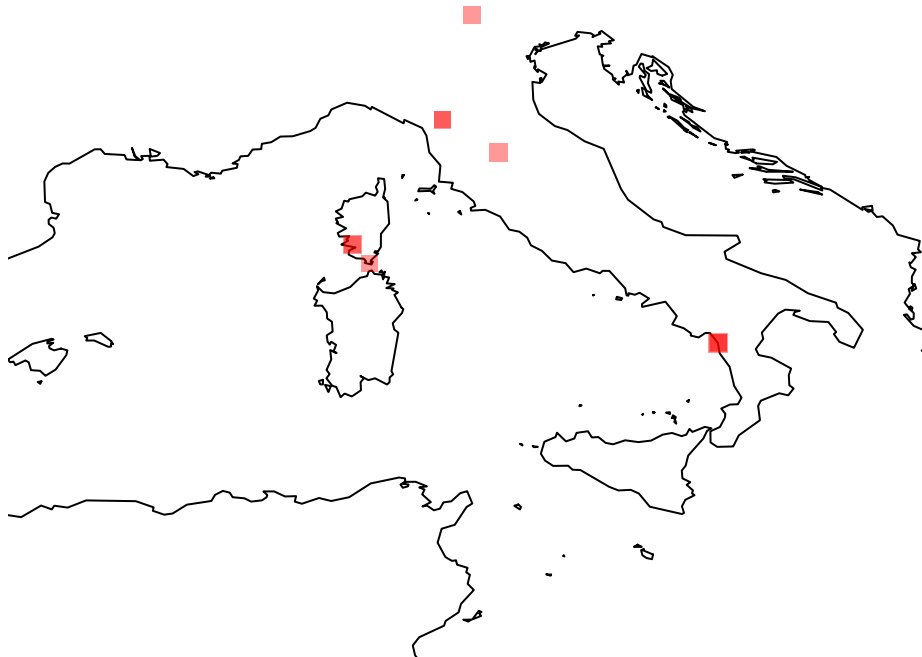



7965 cal. BC

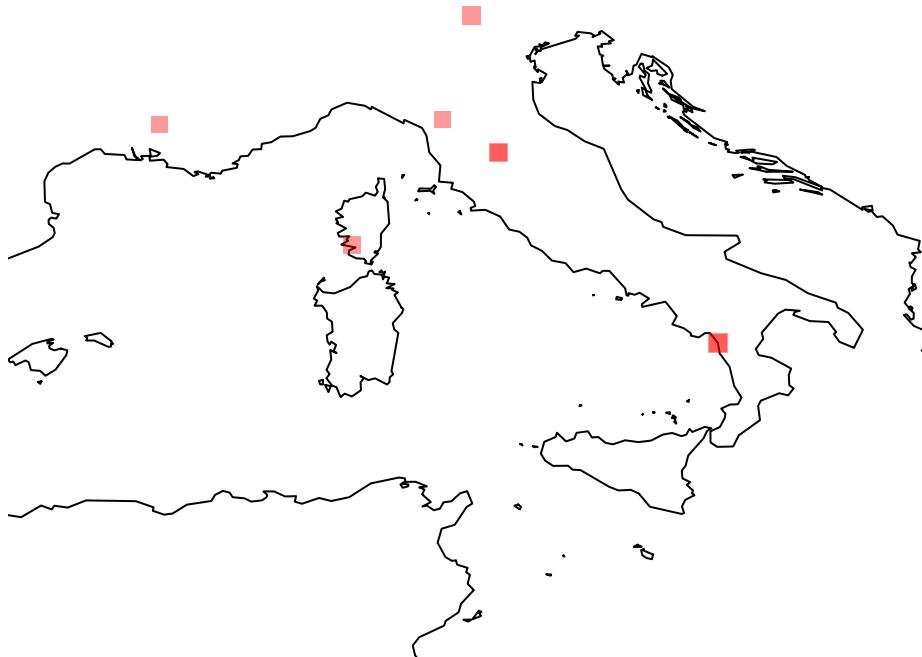

7960 cal. BC



7955 cal. BC

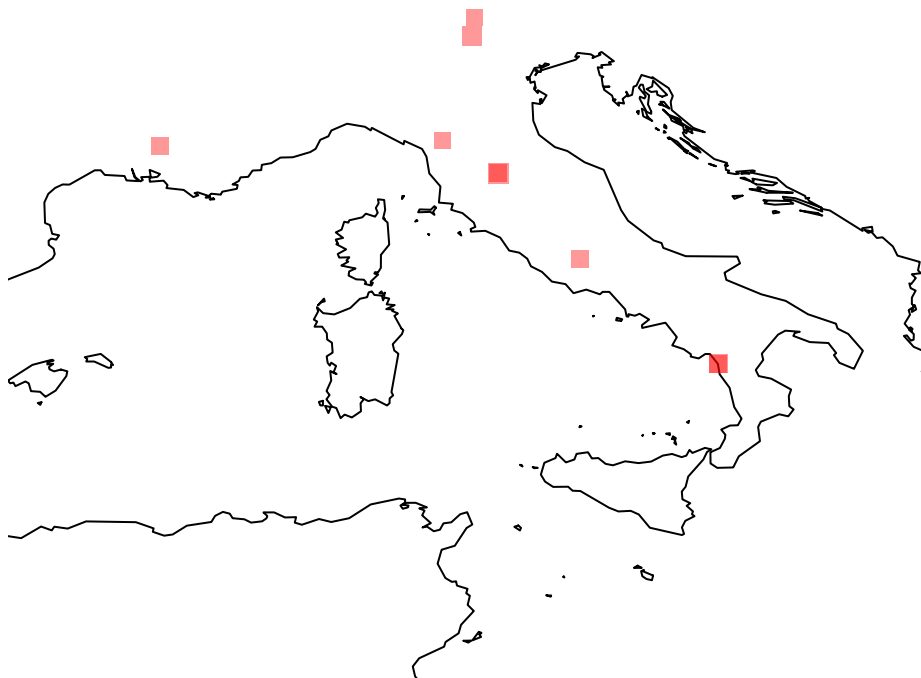

7950 cal. BC

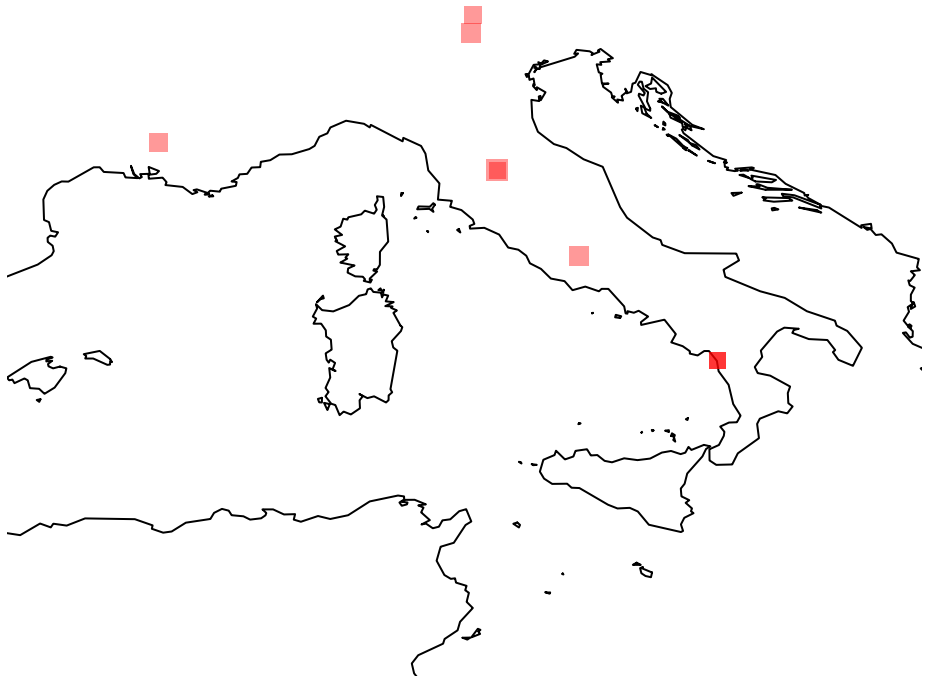

7945 cal. BC

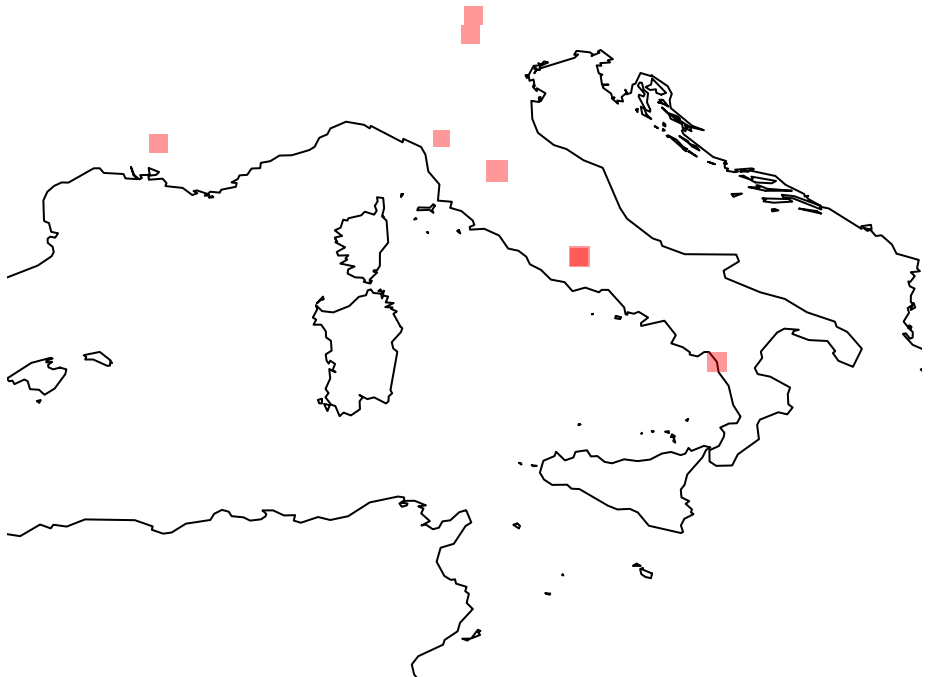

7940 cal. BC

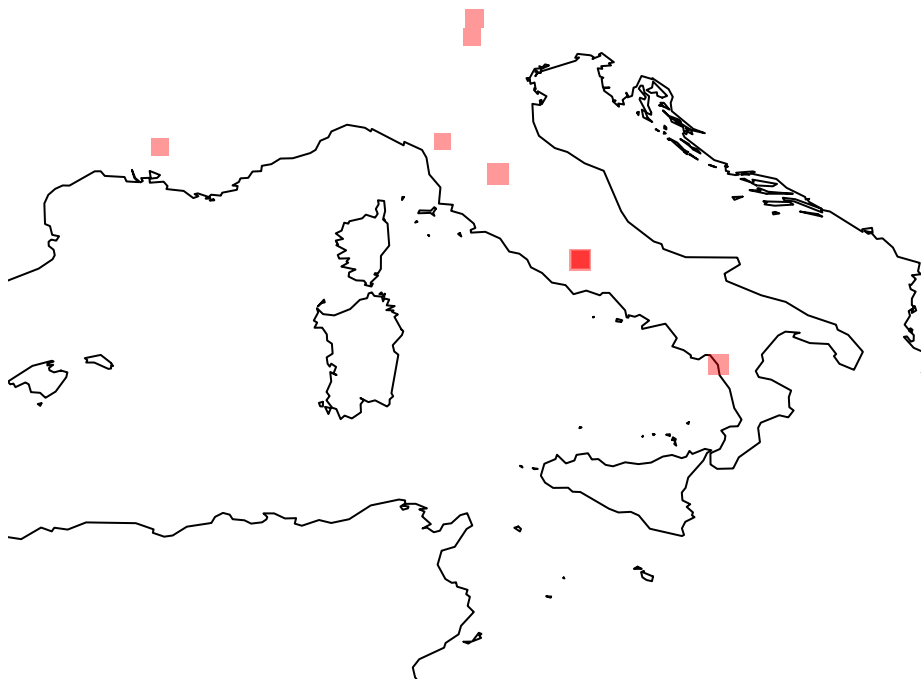

7935 cal. BC

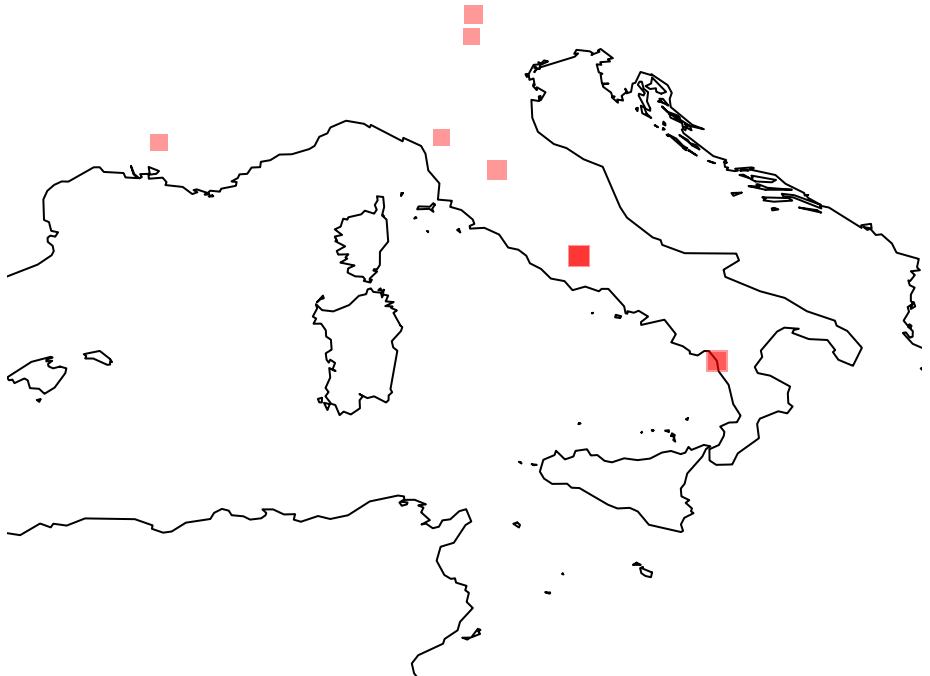

7930 cal. BC

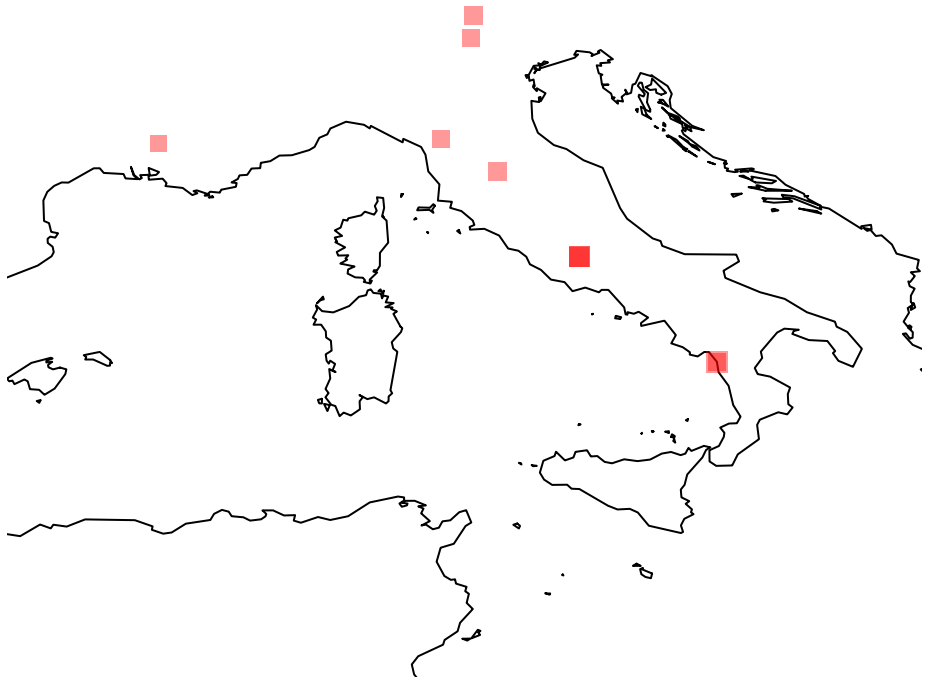



7925 cal. BC

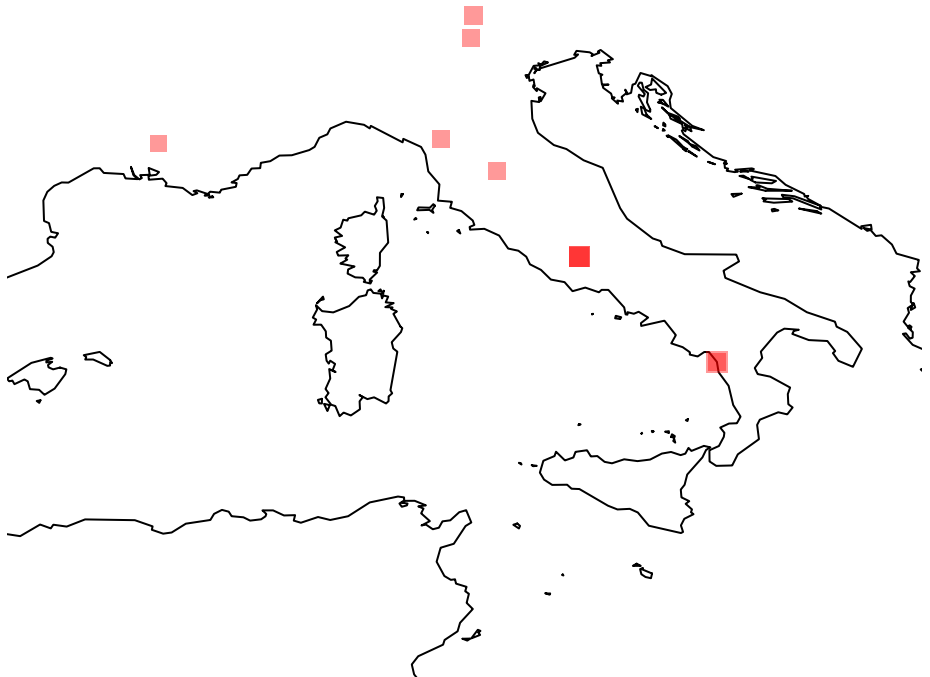

7920 cal. BC

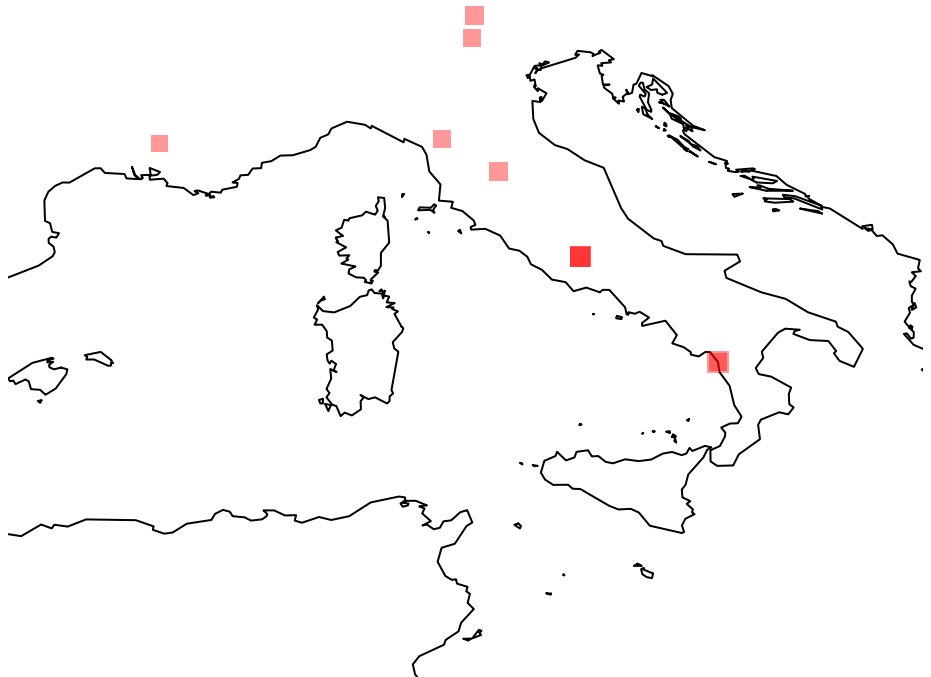

7915 cal. BC

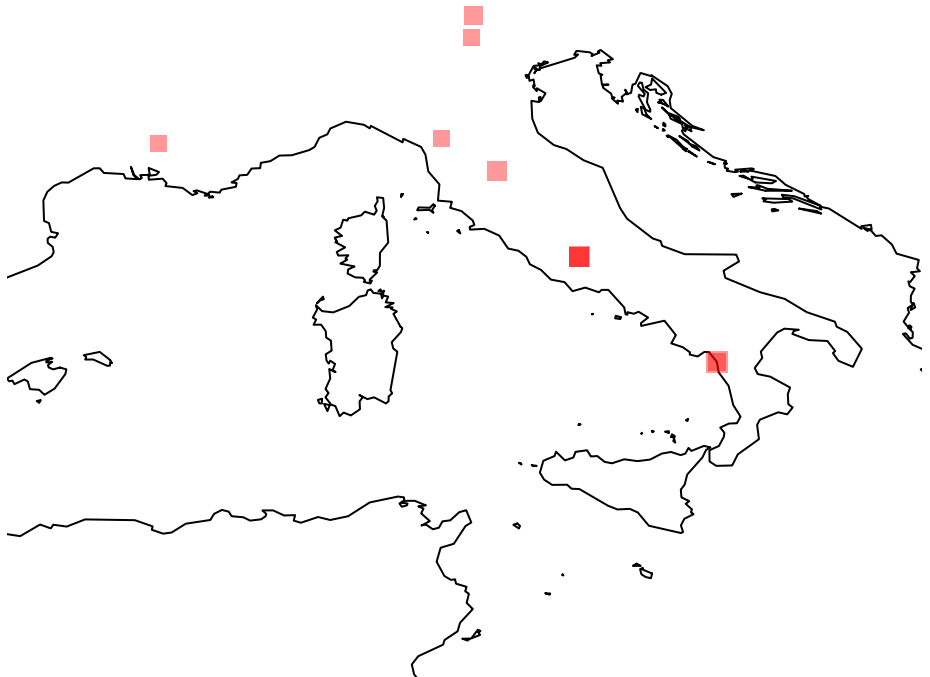

7910 cal. BC

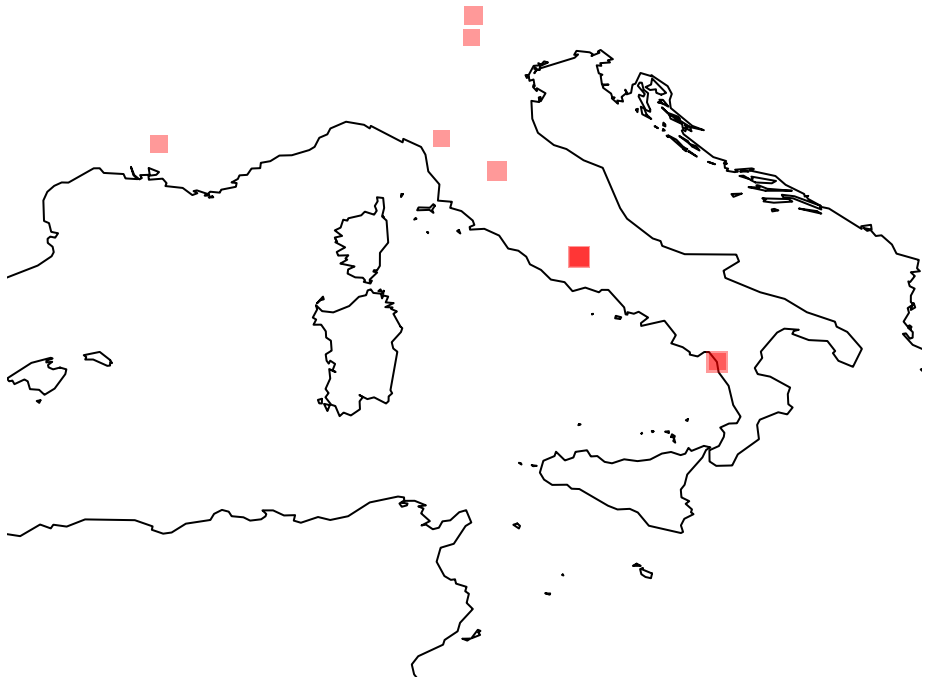

7905 cal. BC

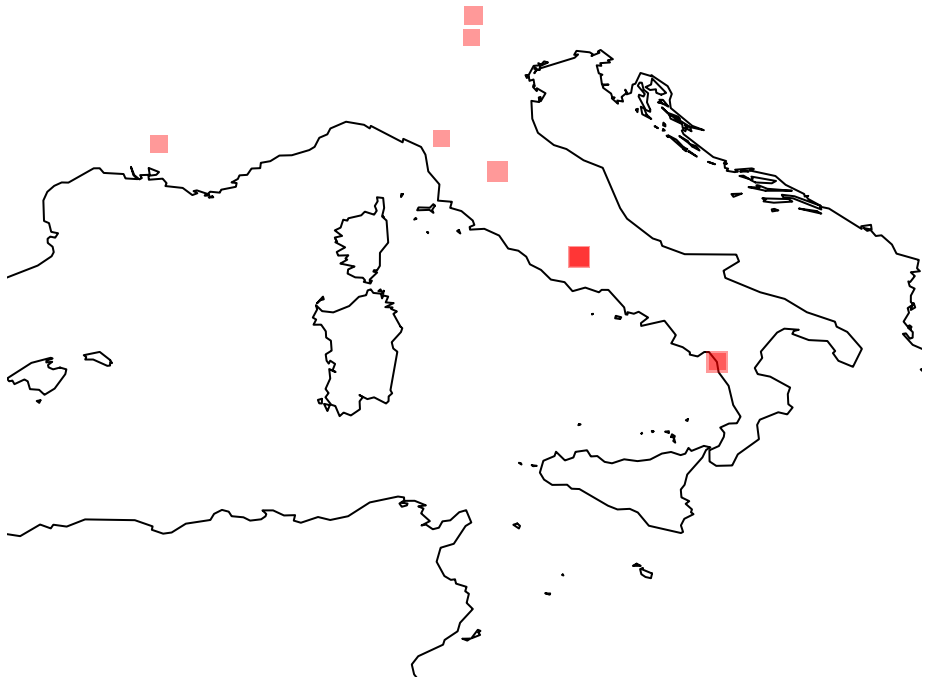

7900 cal. BC

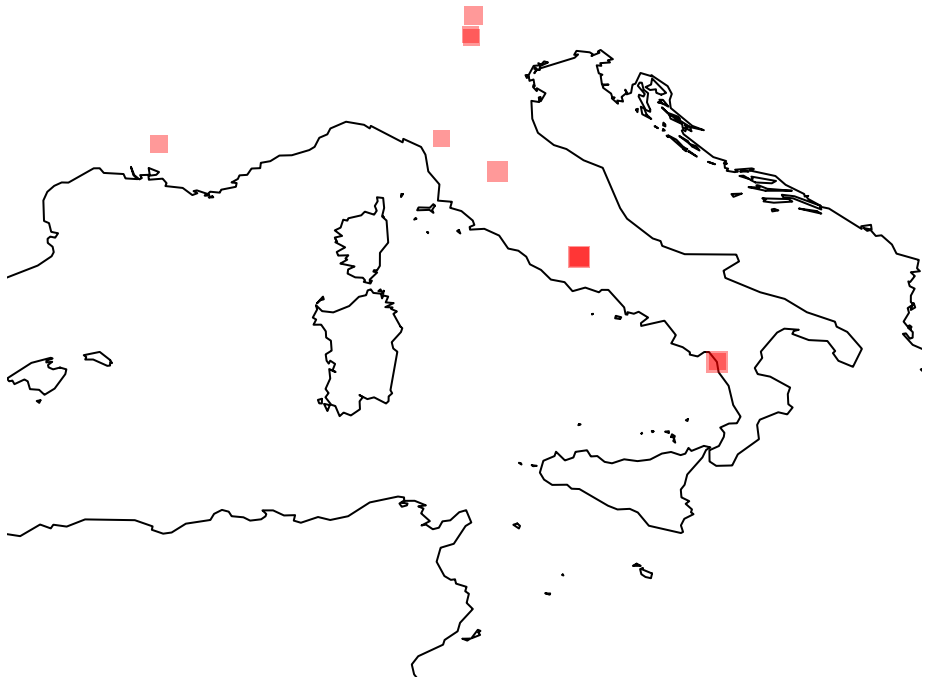

7895 cal. BC

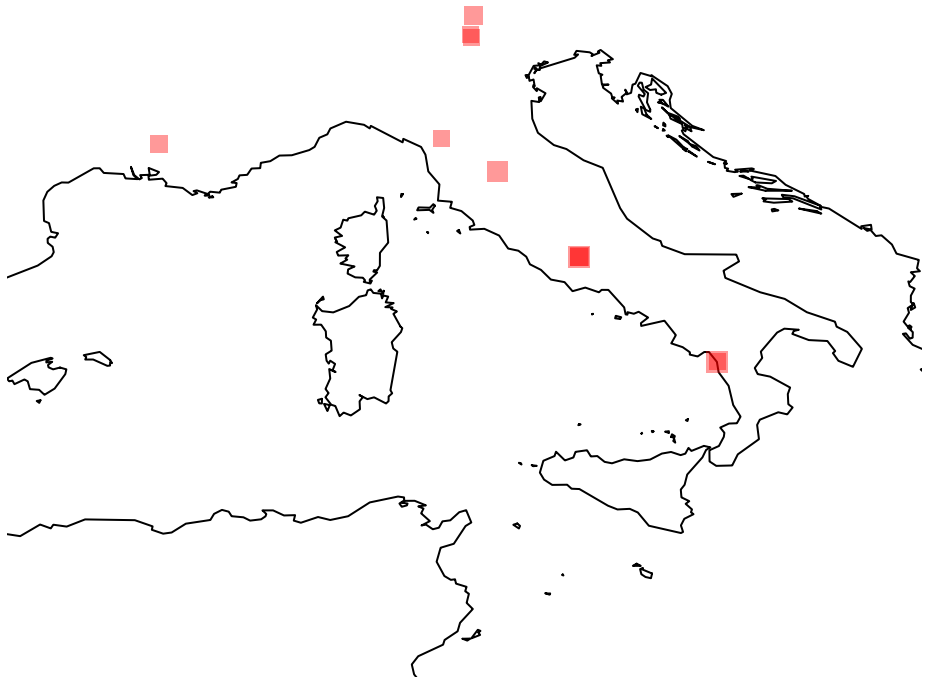

7890 cal. BC

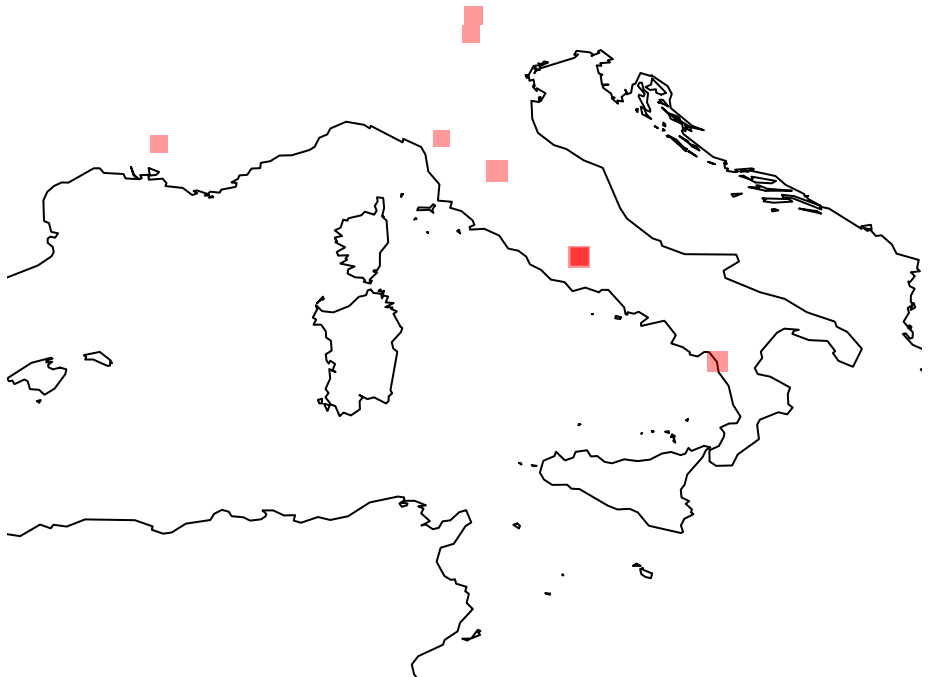



7885 cal. BC

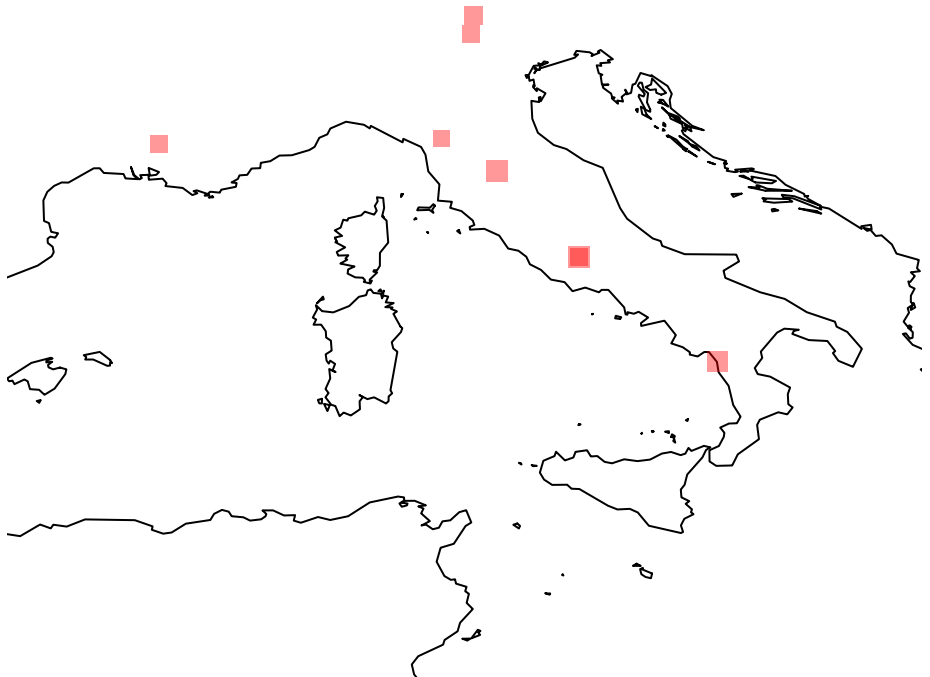

7880 cal. BC

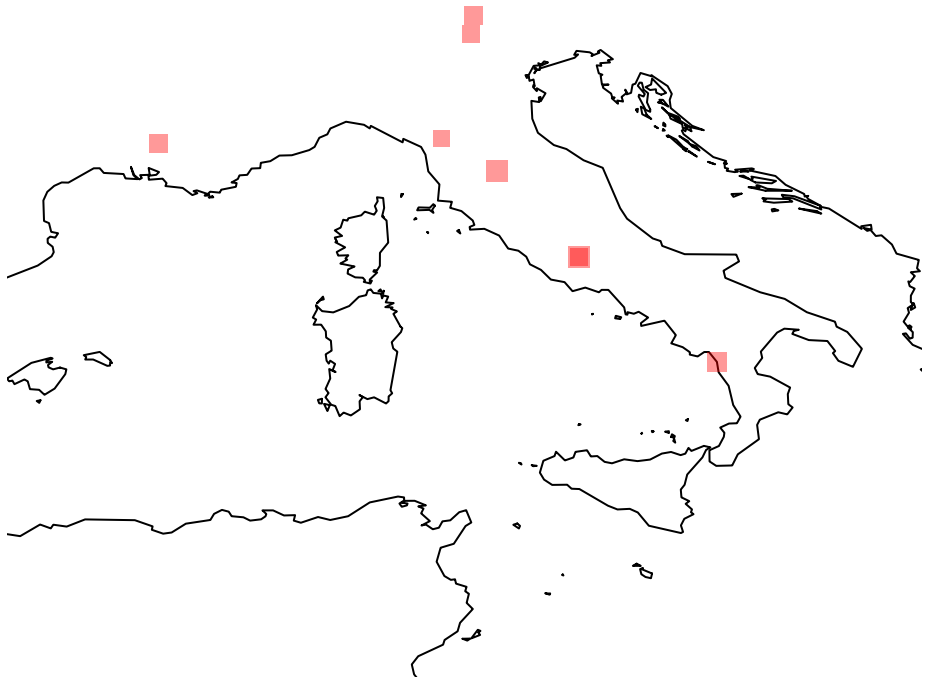

7875 cal. BC

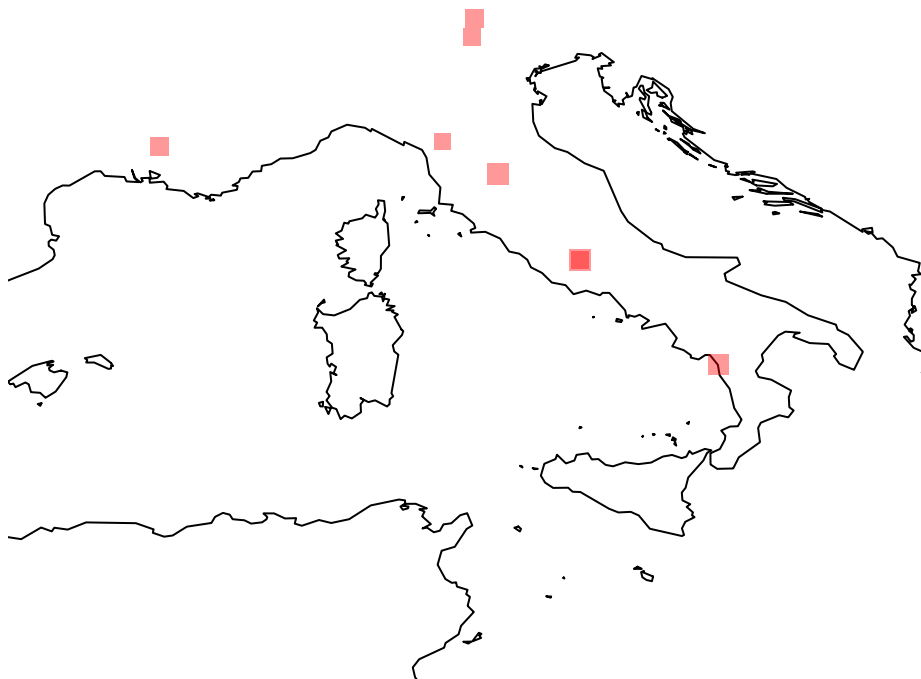

7870 cal. BC

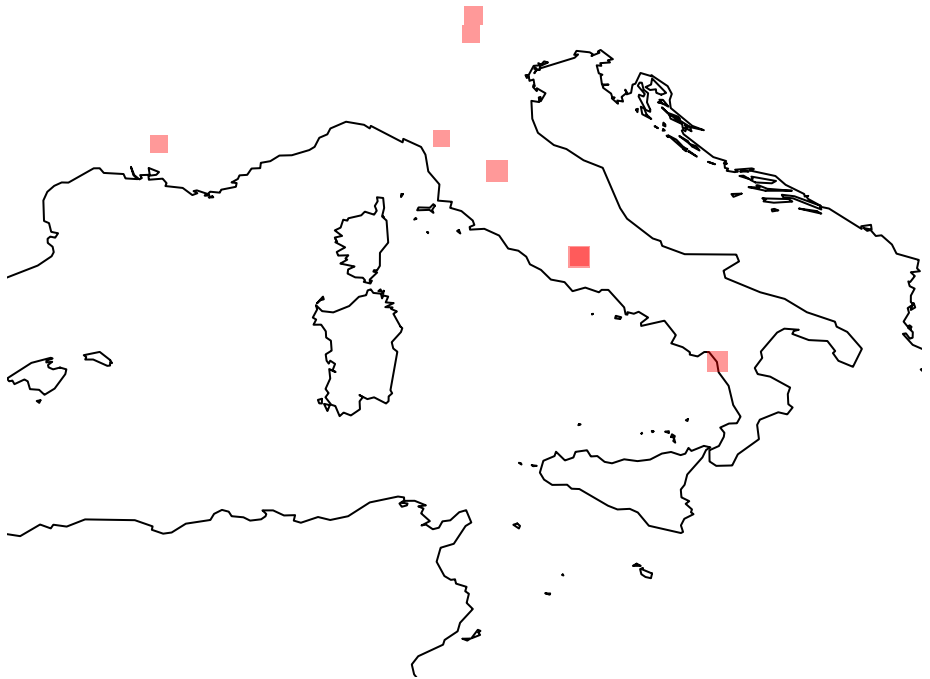

7865 cal. BC

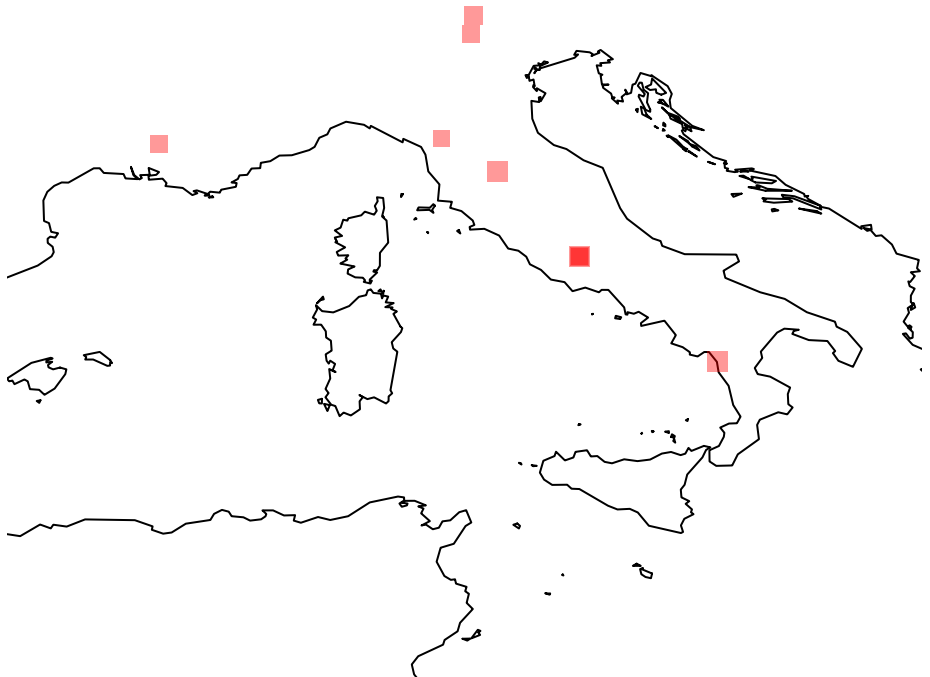

7860 cal. BC

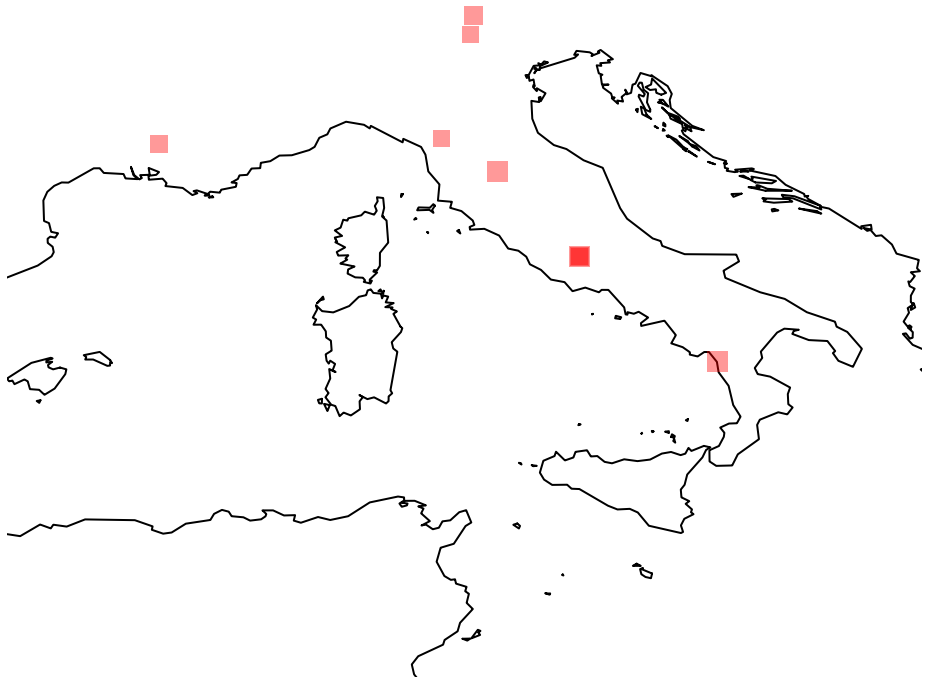

7855 cal. BC



7850 cal. BC

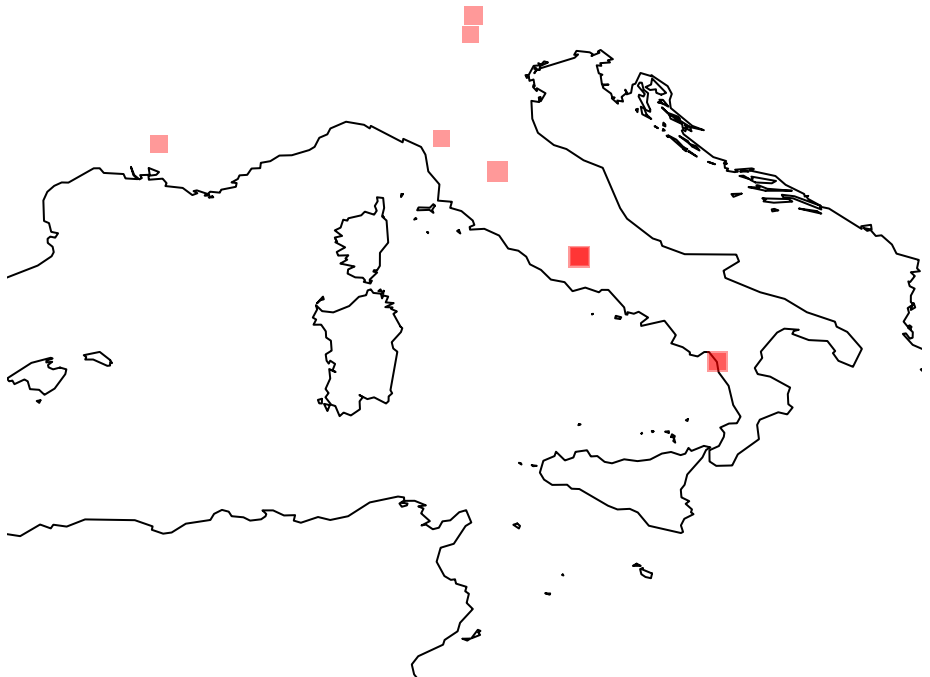



7845 cal. BC

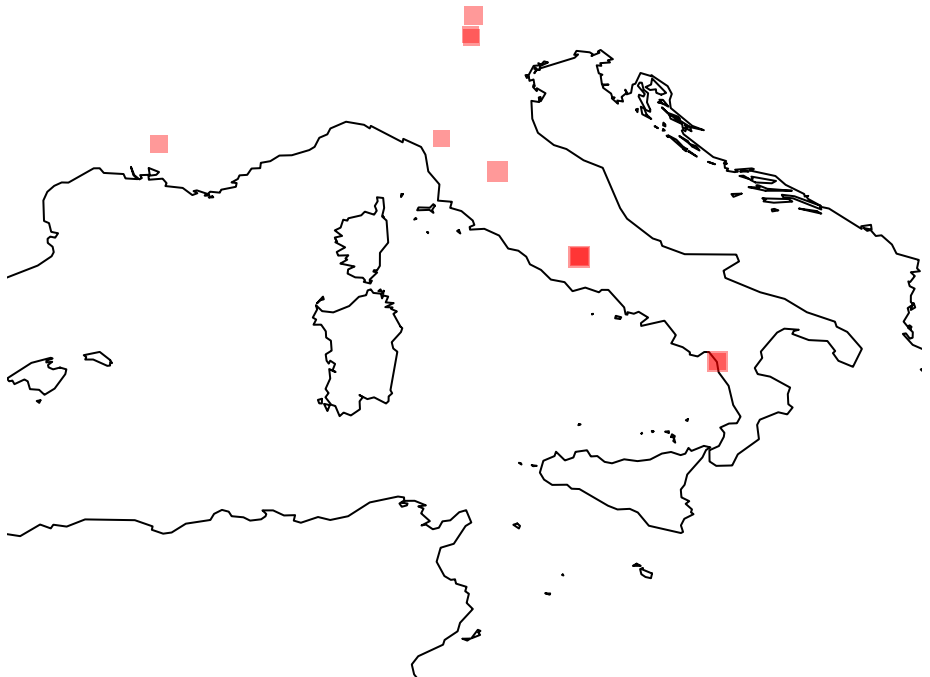

7840 cal. BC



7835 cal. BC



7830 cal. BC



7825 cal. BC

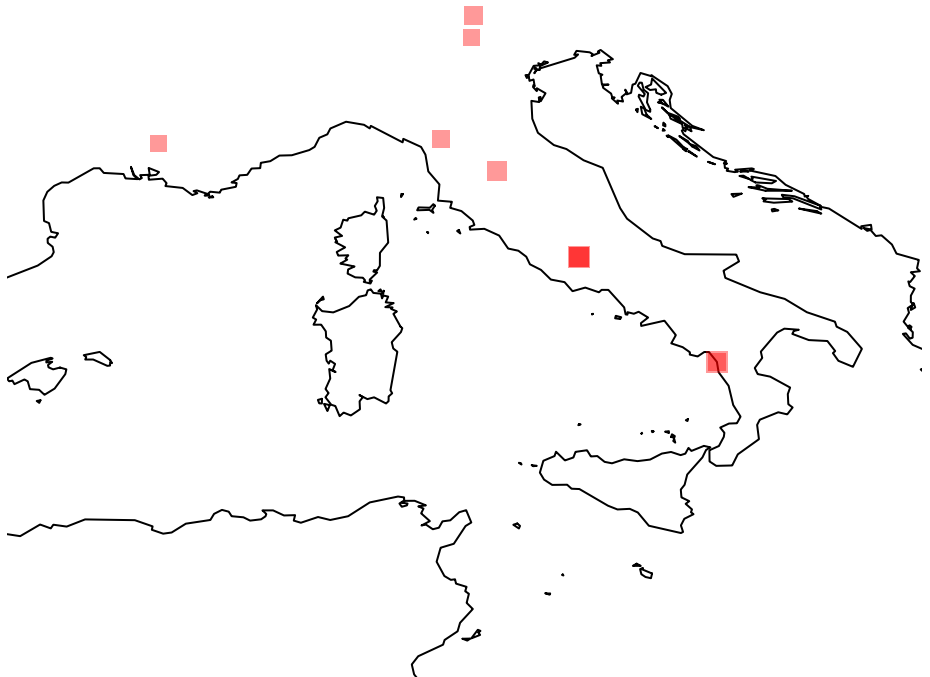

7820 cal. BC

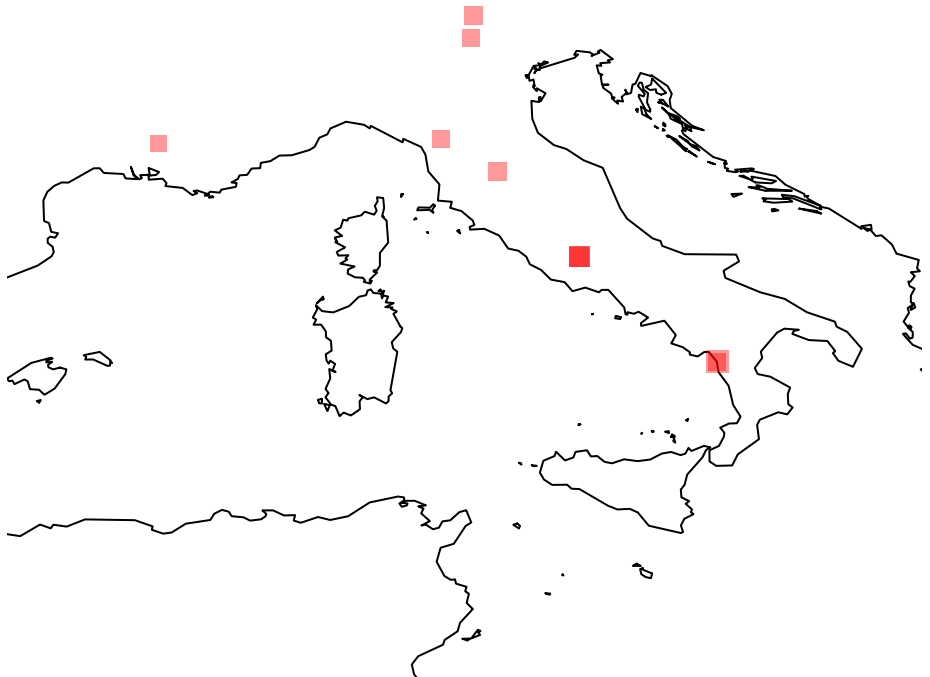

7815 cal. BC

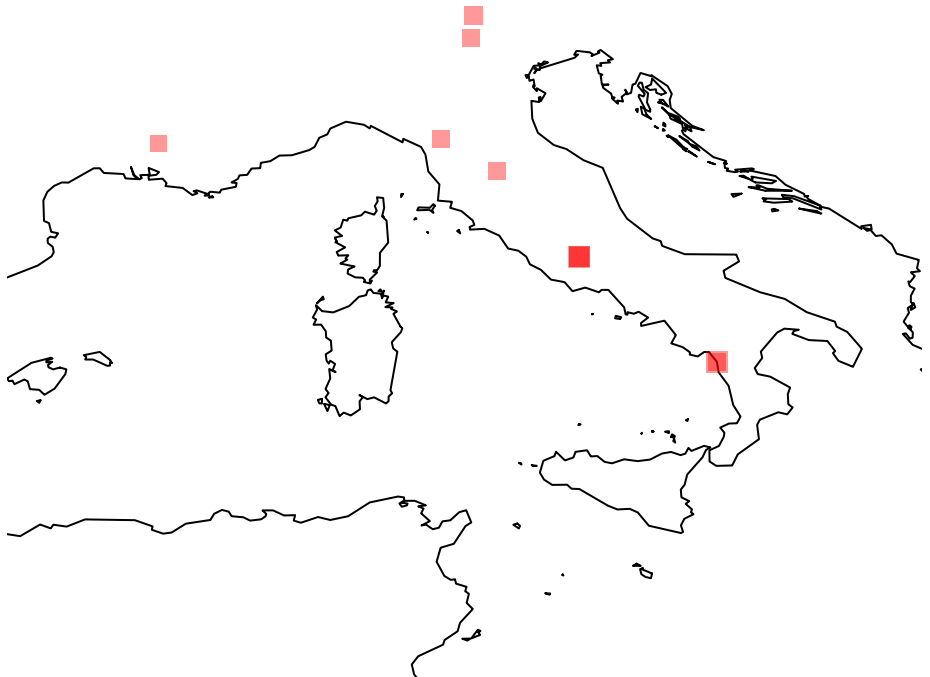





7805 cal. BC

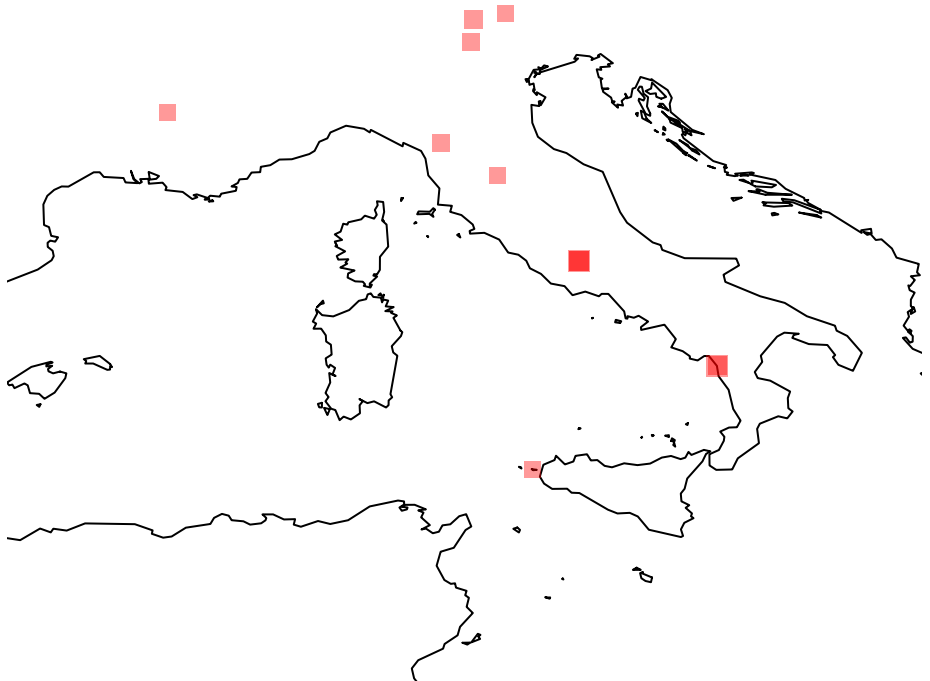

7800 cal. BC

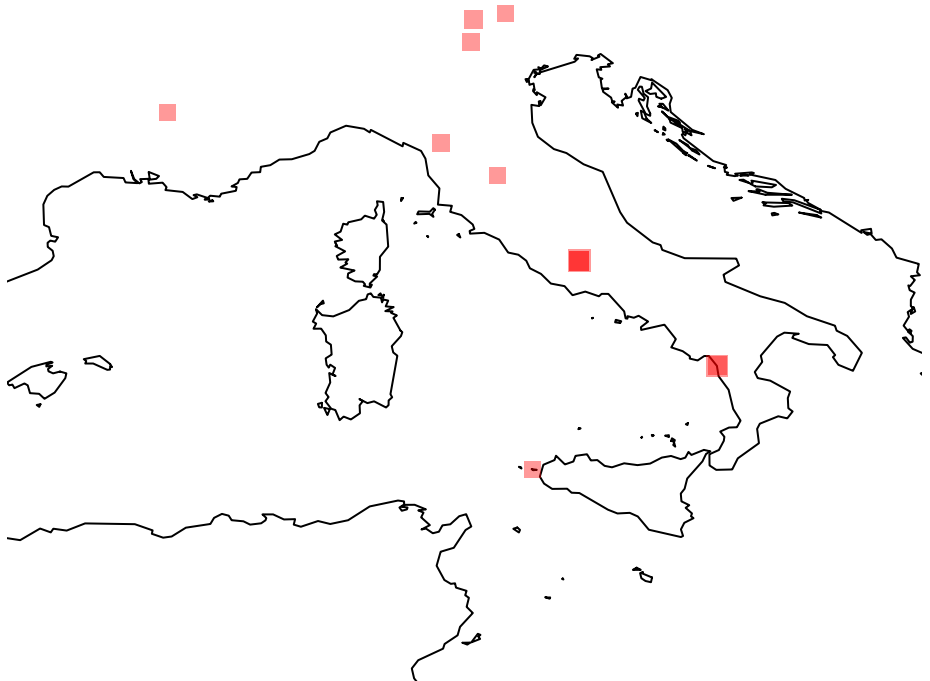

7795 cal. BC

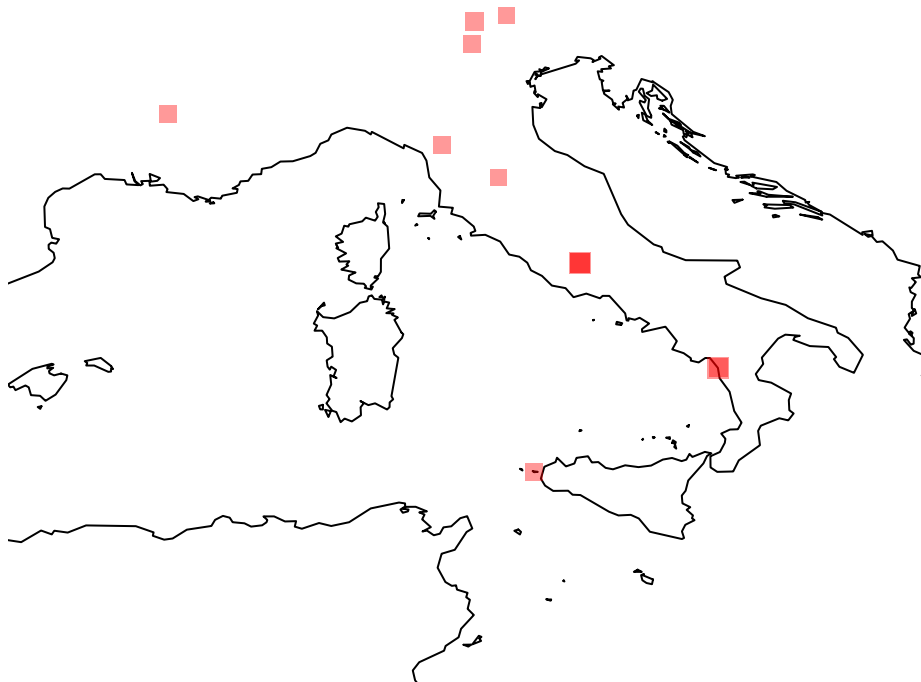

7790 cal. BC

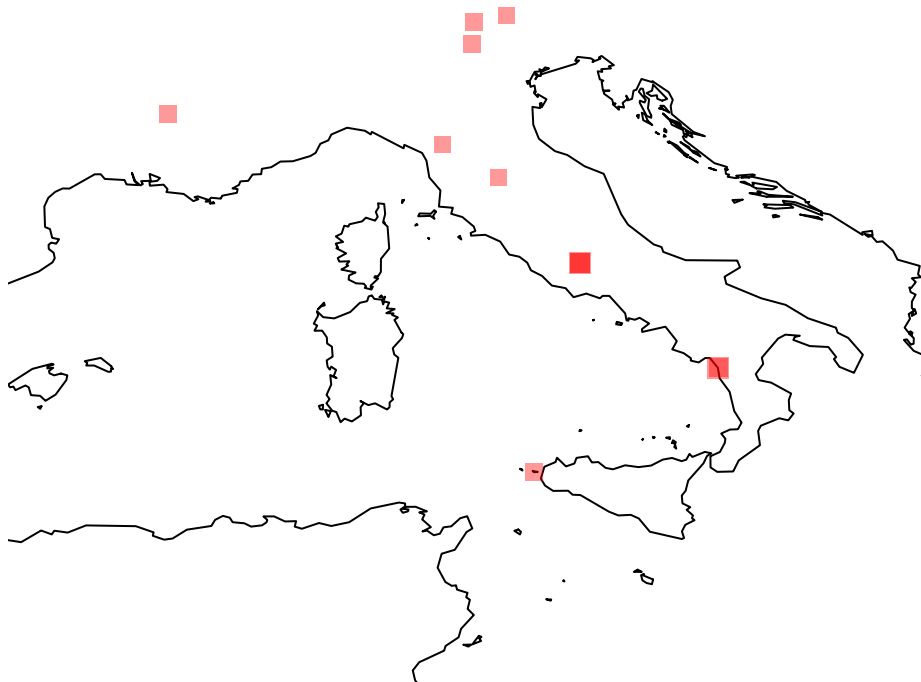

7785 cal. BC

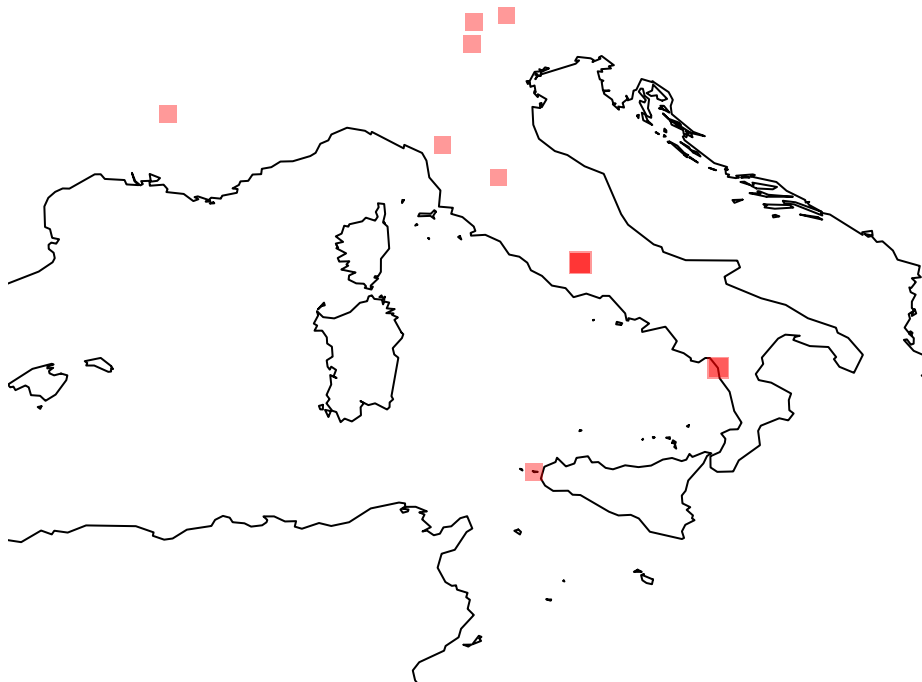

7780 cal. BC

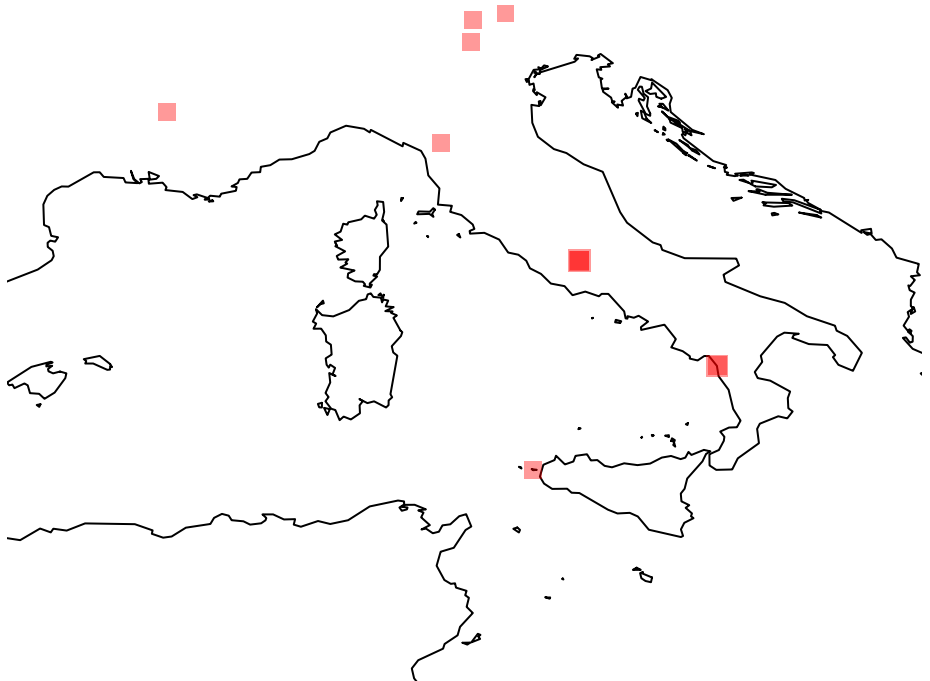

7775 cal. BC

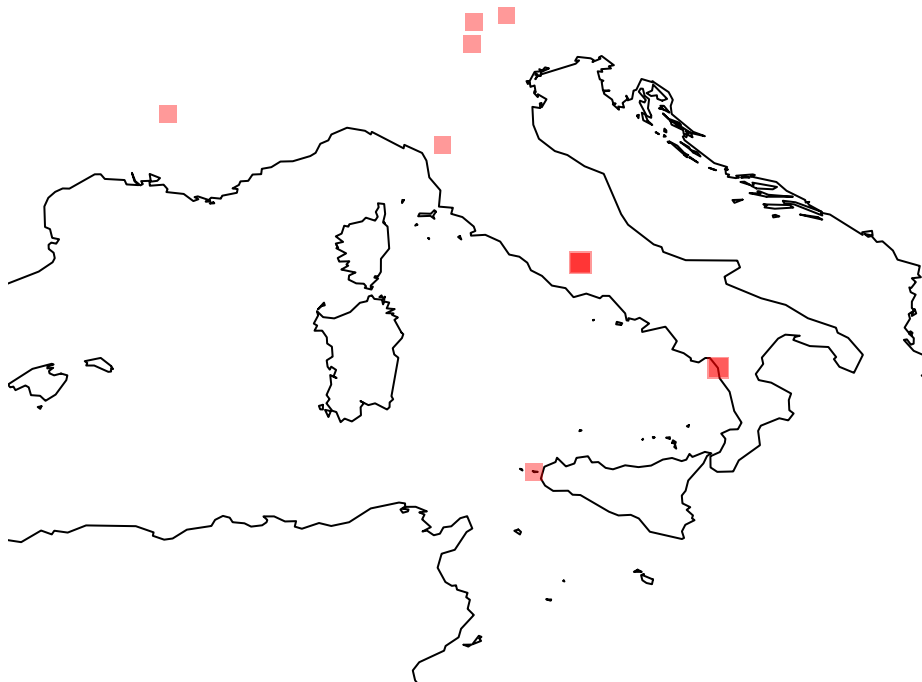

7770 cal. BC

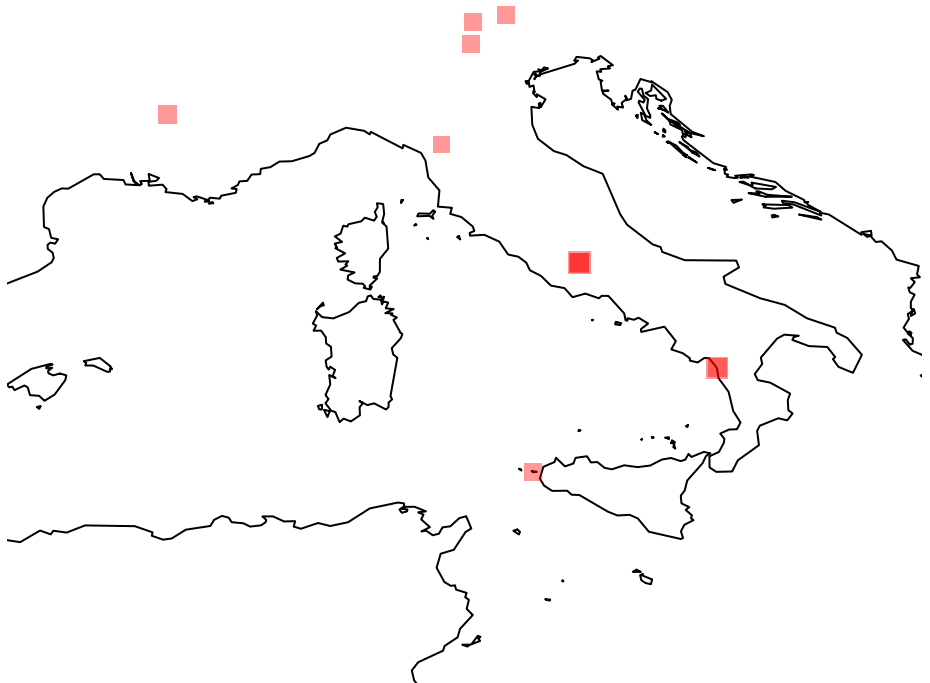



7765 cal. BC

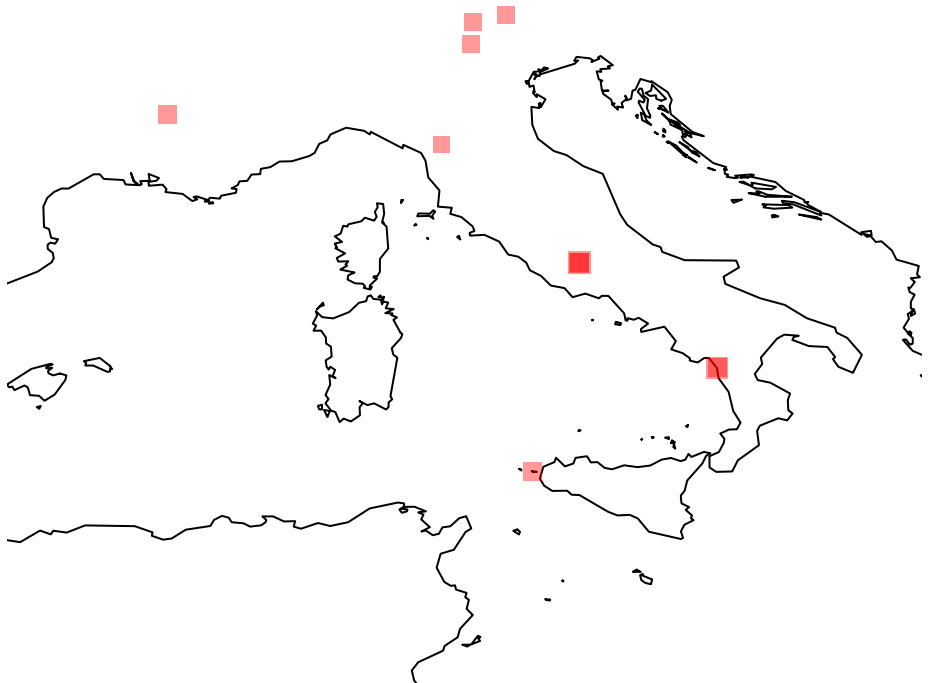

7760 cal. BC

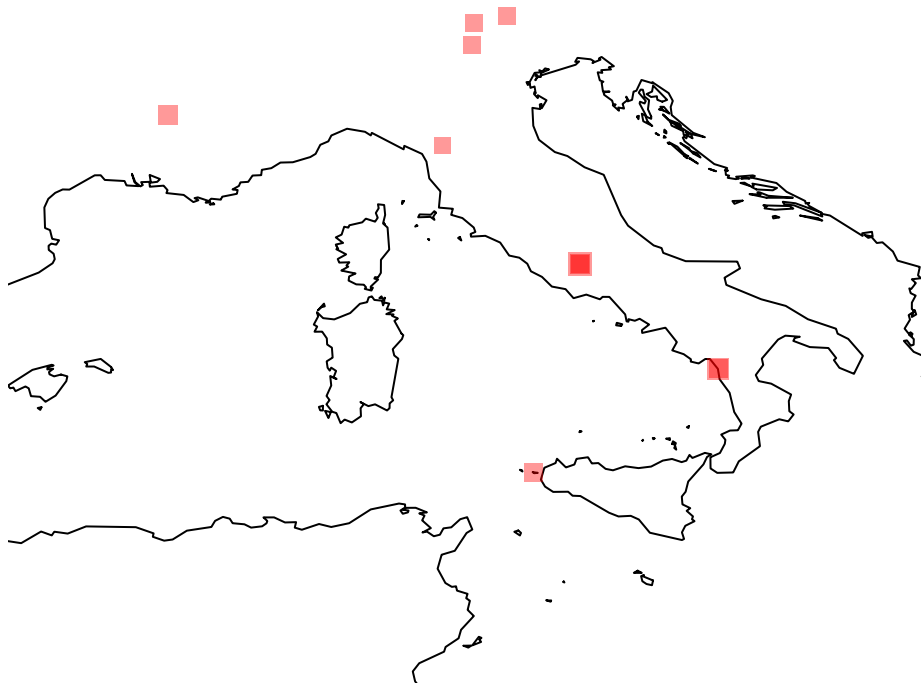

7755 cal. BC

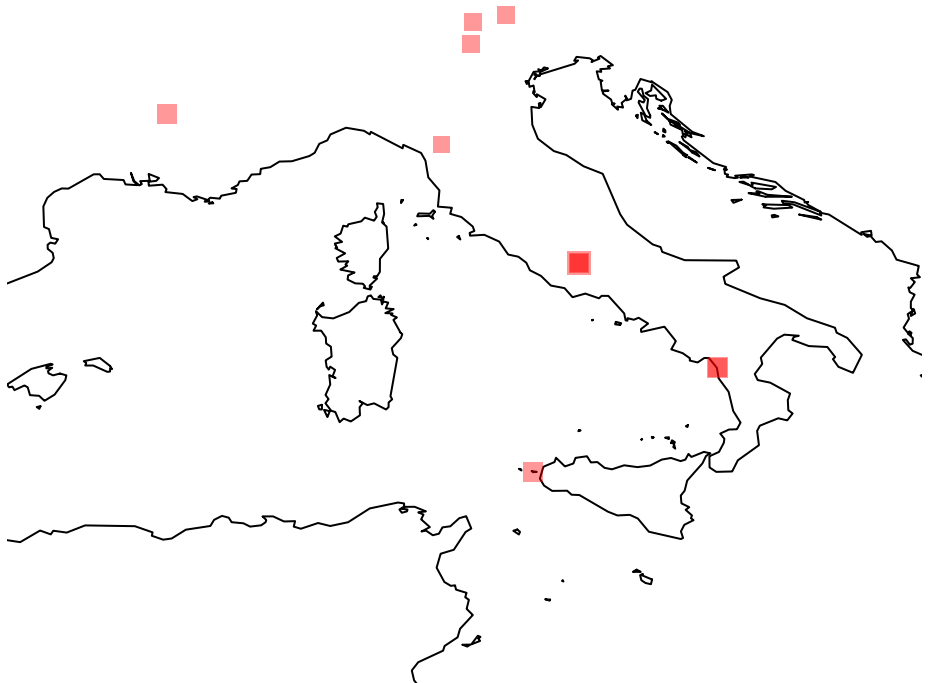

7750 cal. BC

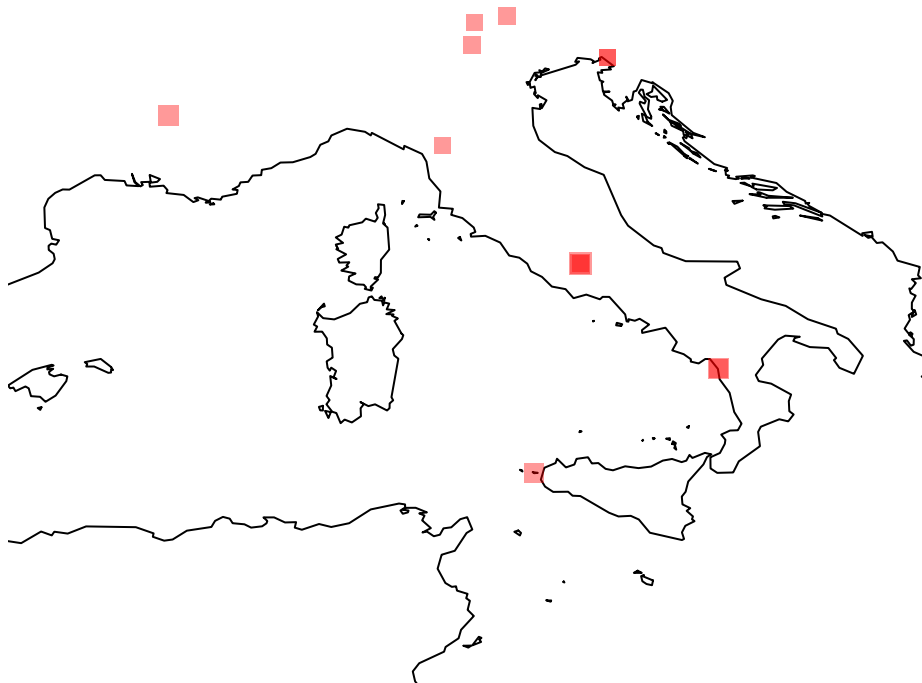

7745 cal. BC

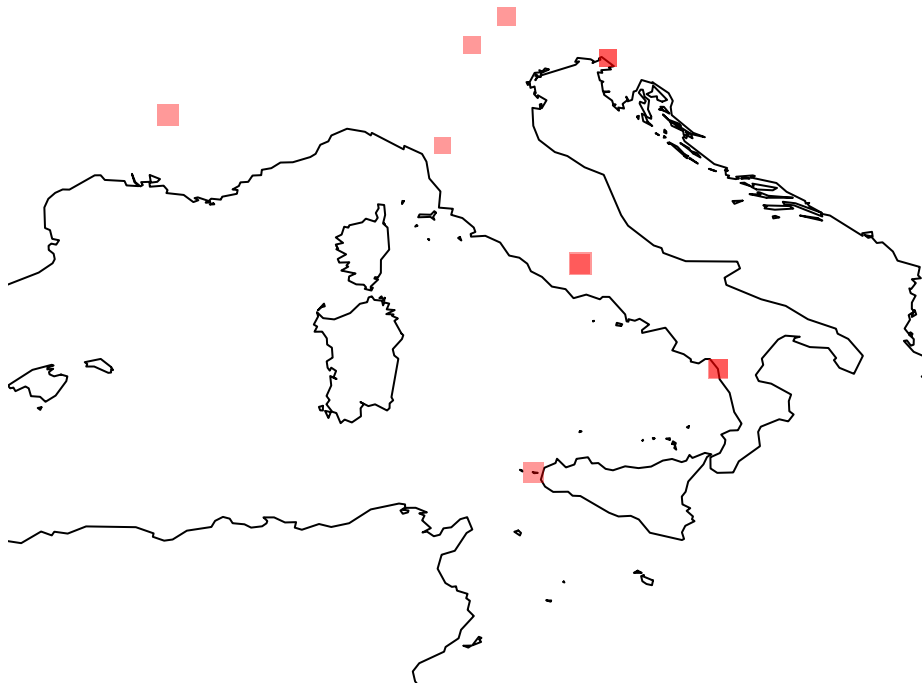

7740 cal. BC

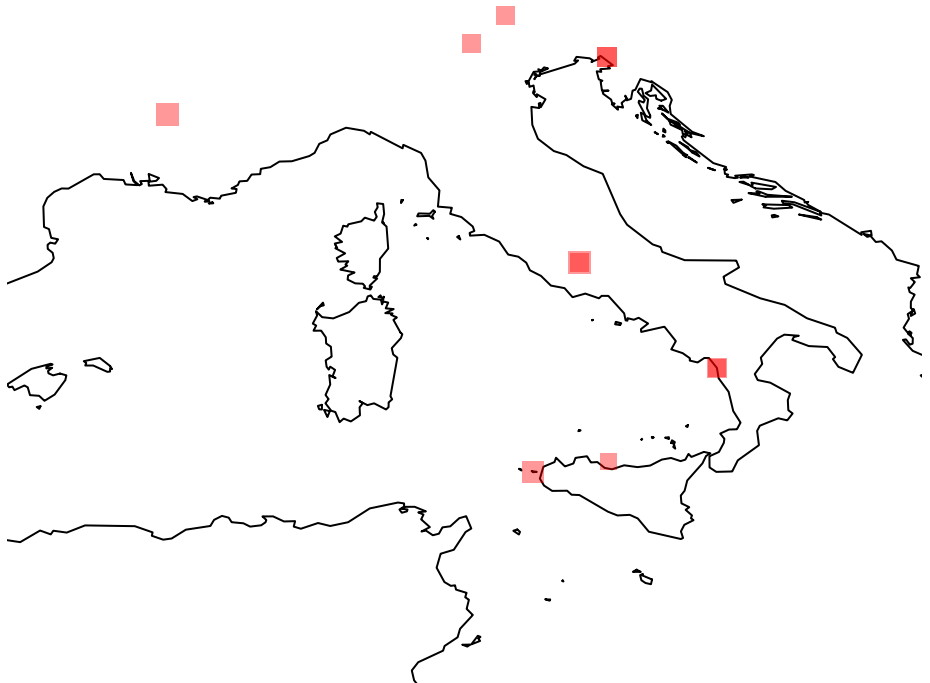

7735 cal. BC

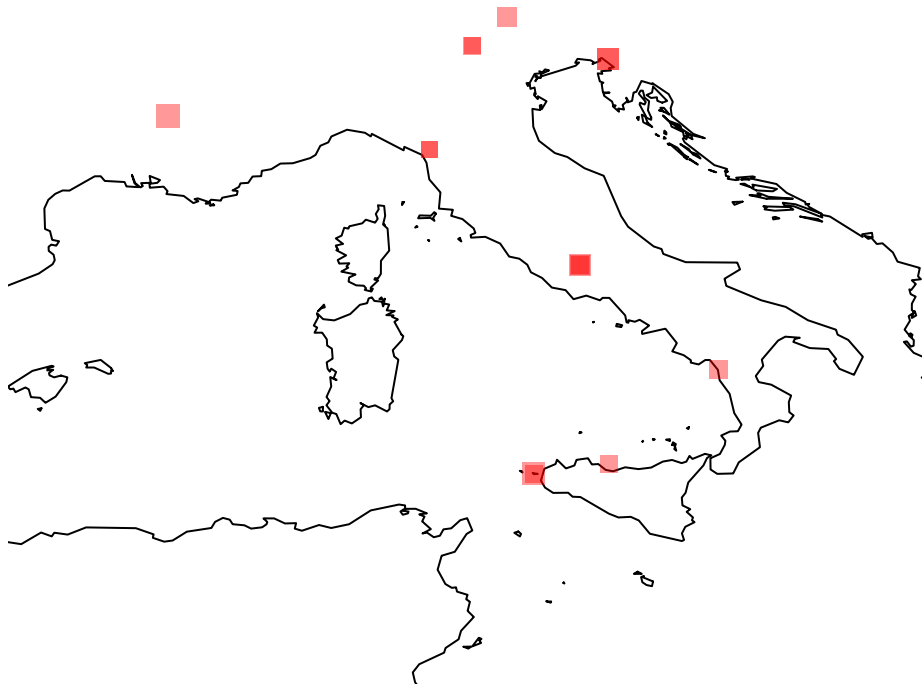

7730 cal. BC

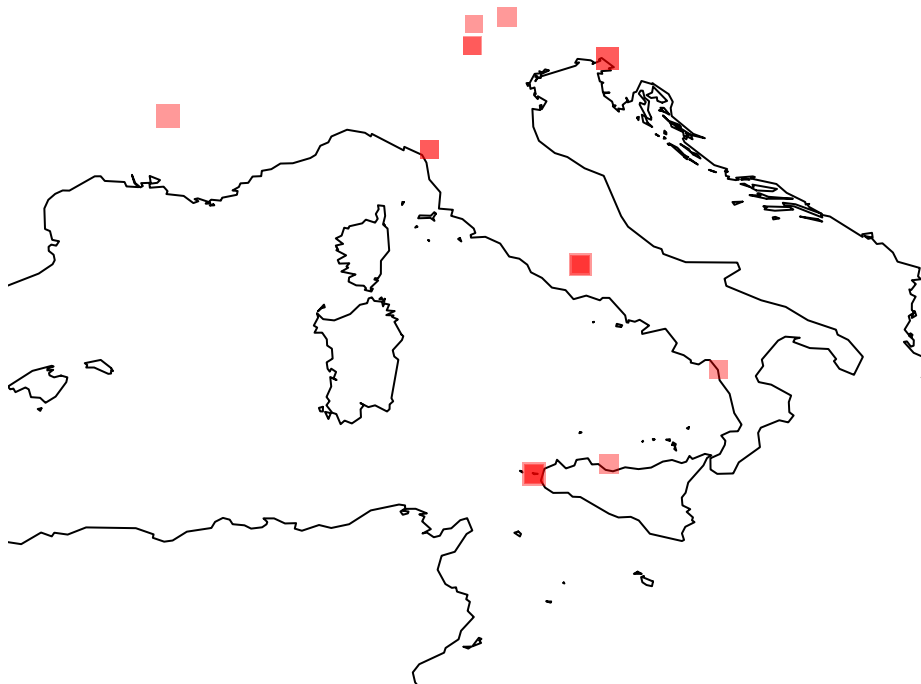



7725 cal. BC

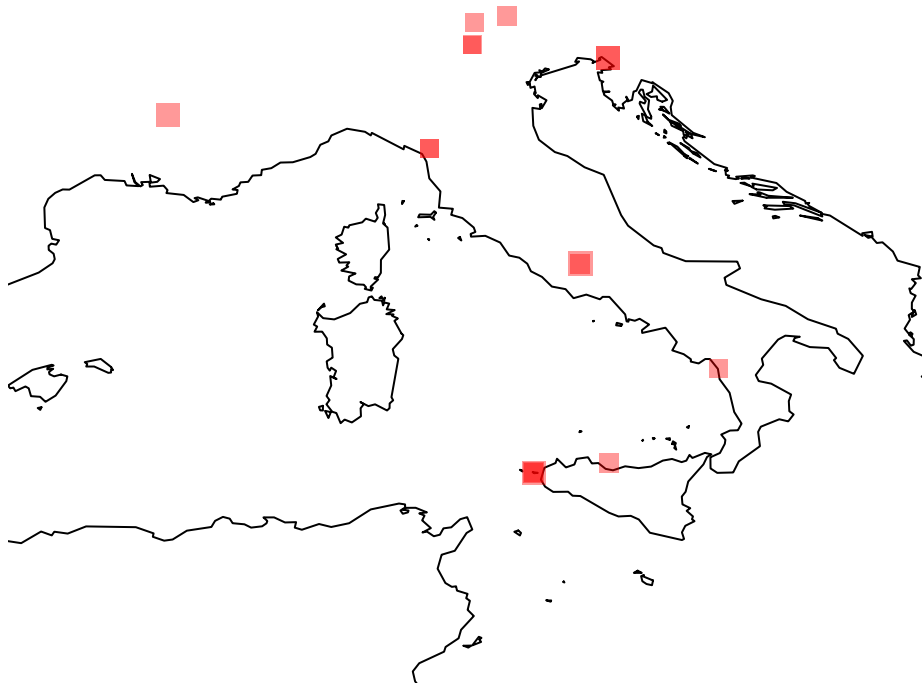

7720 cal. BC

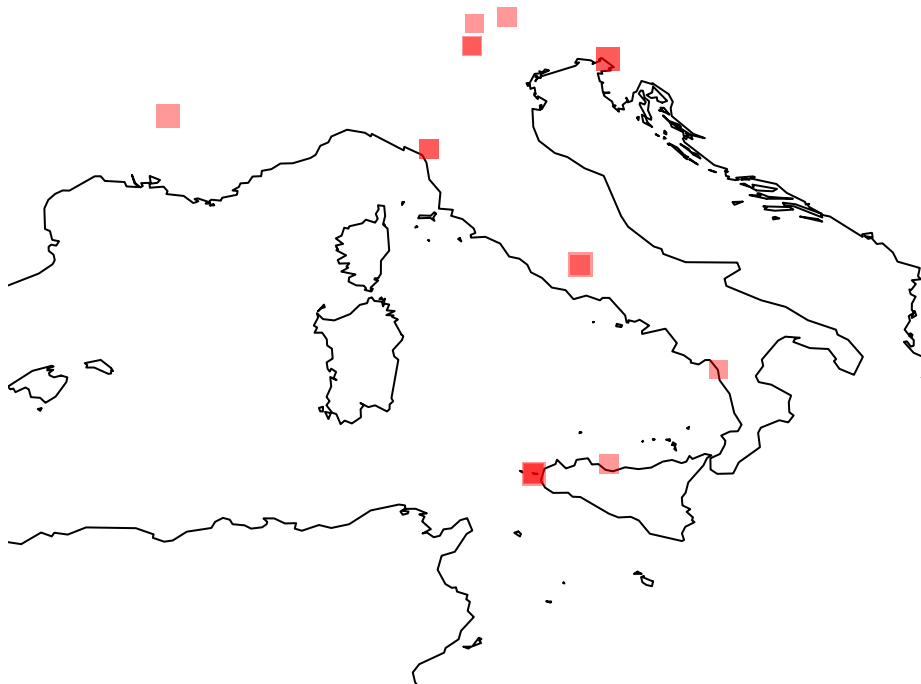

7715 cal. BC

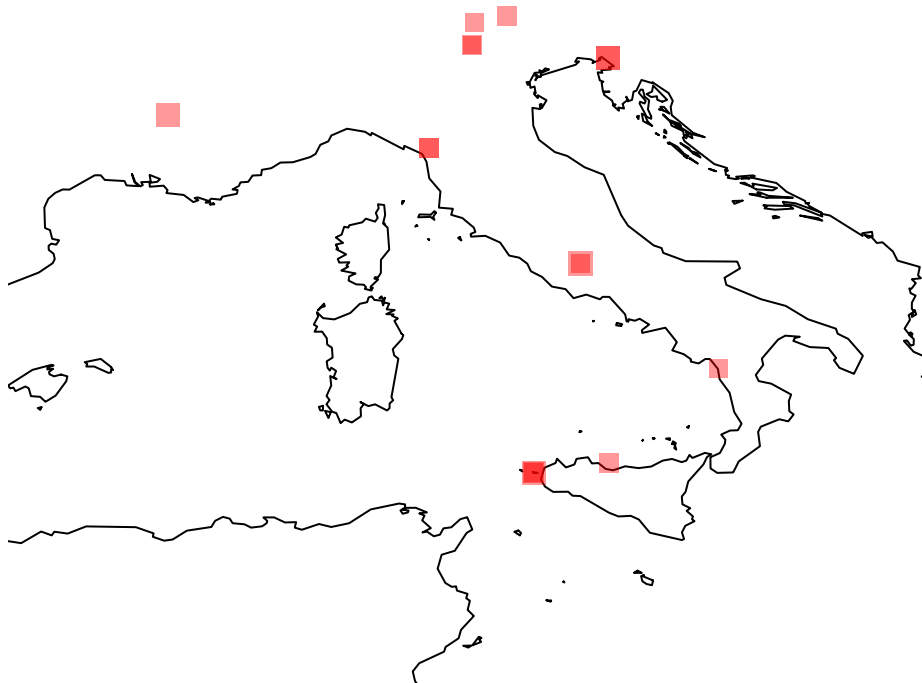

7710 cal. BC

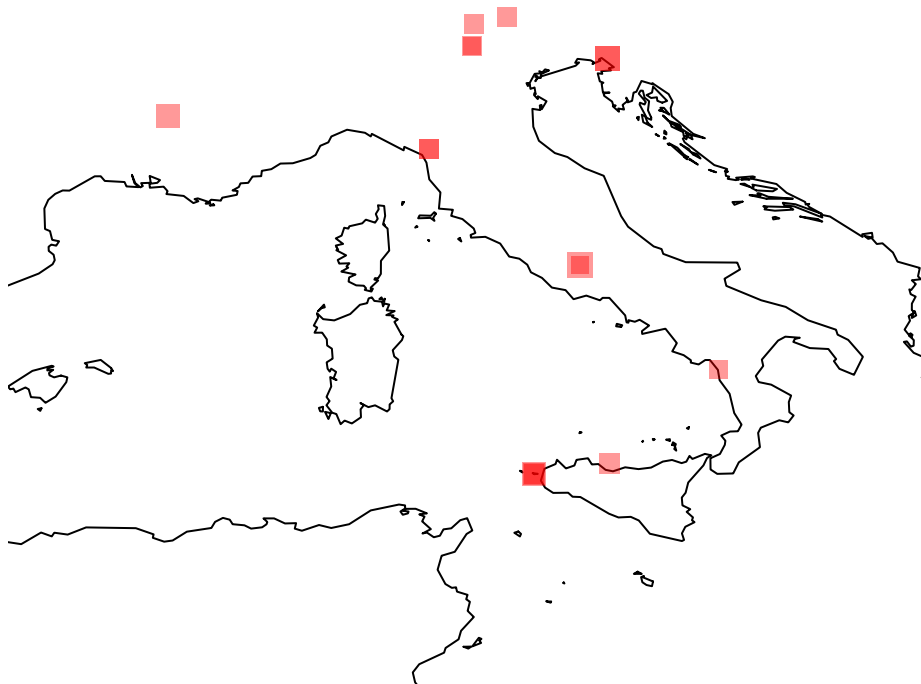

7705 cal. BC

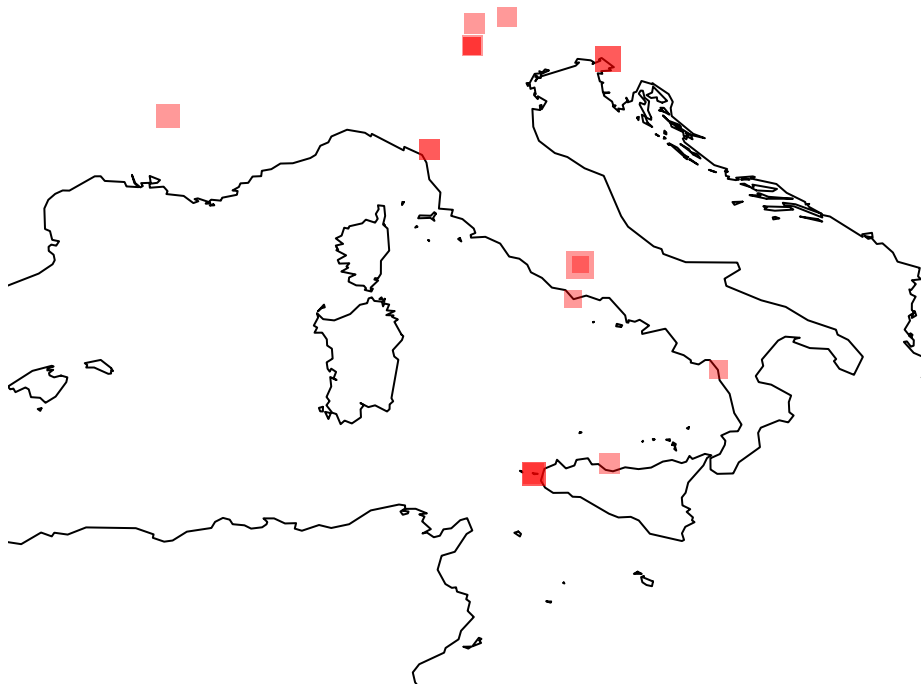

7700 cal. BC

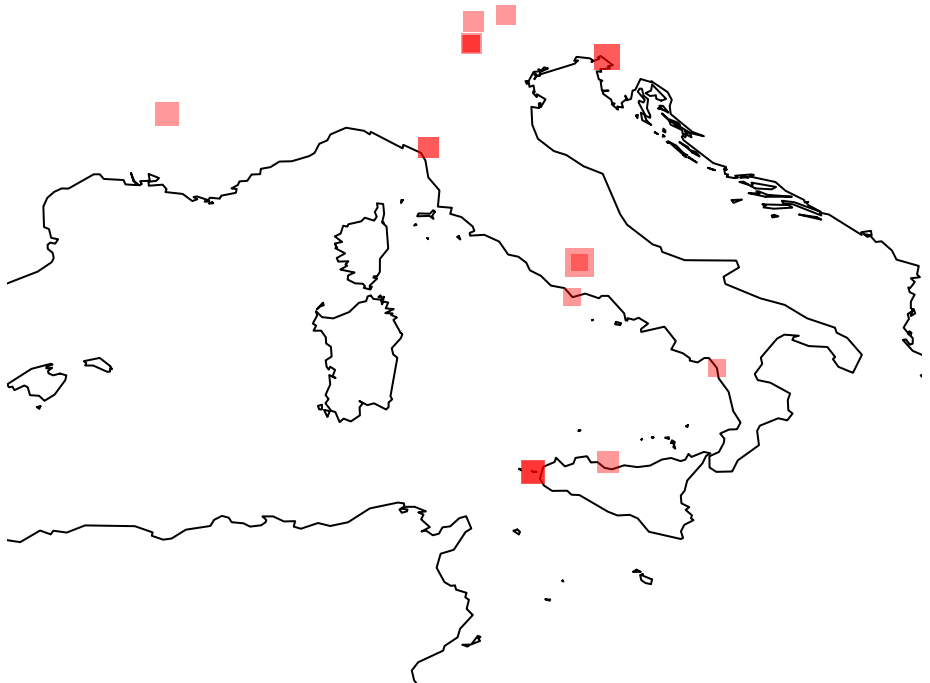

7695 cal. BC

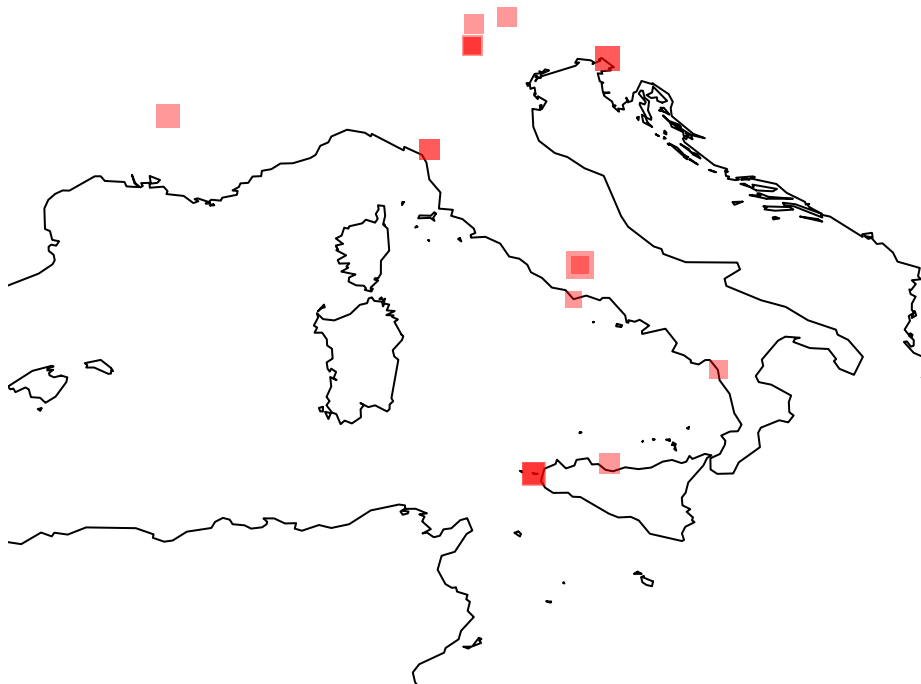

7690 cal. BC

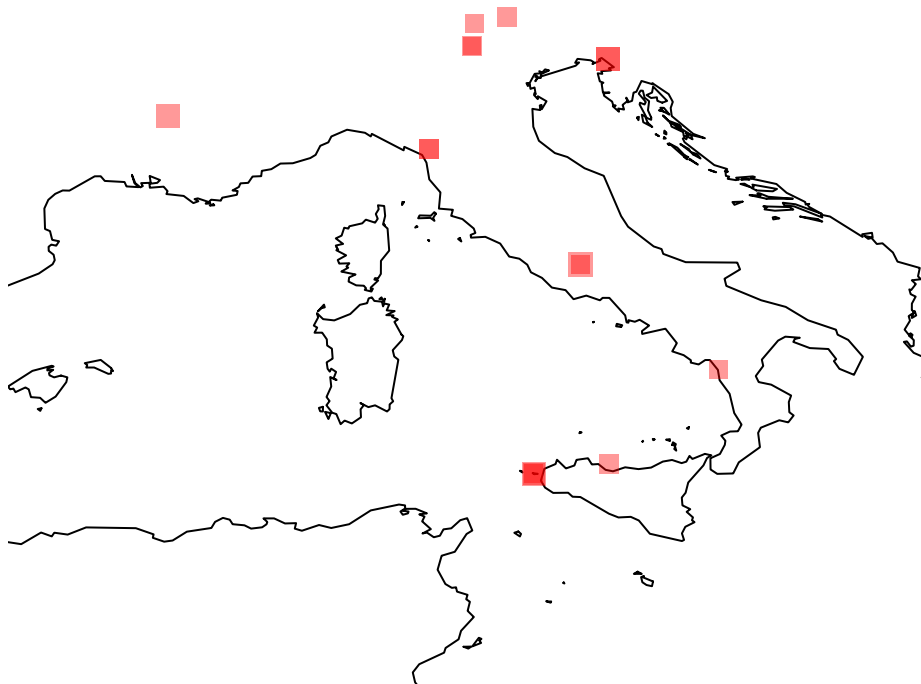



7685 cal. BC

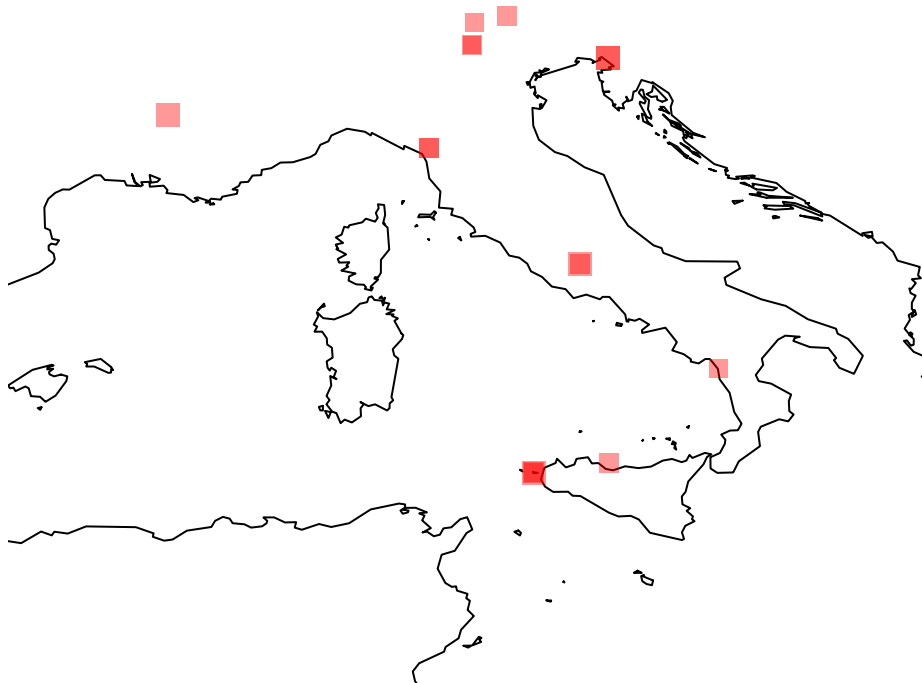

7680 cal. BC

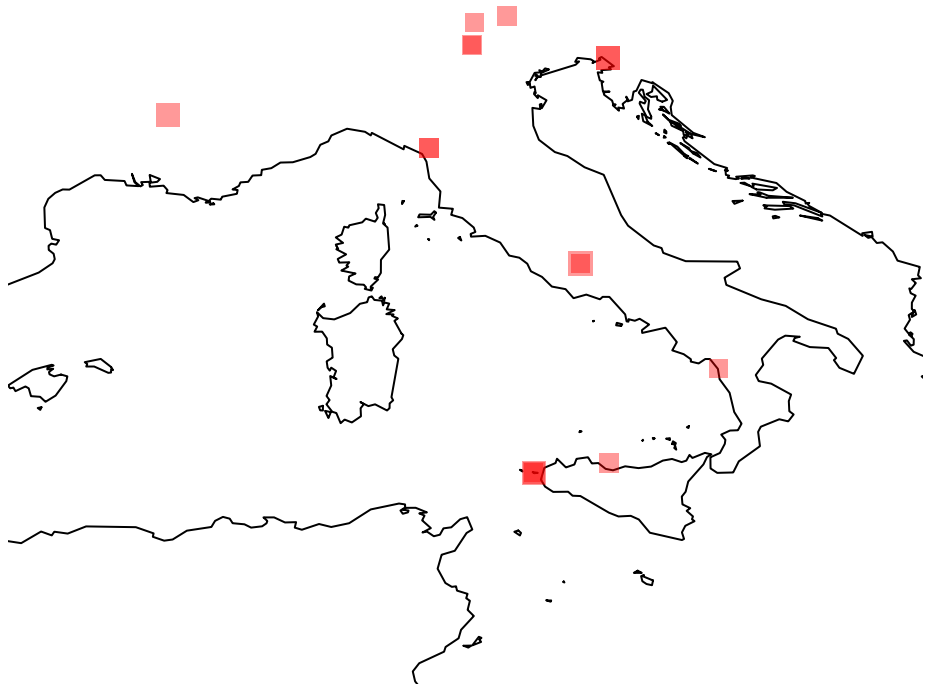

7675 cal. BC

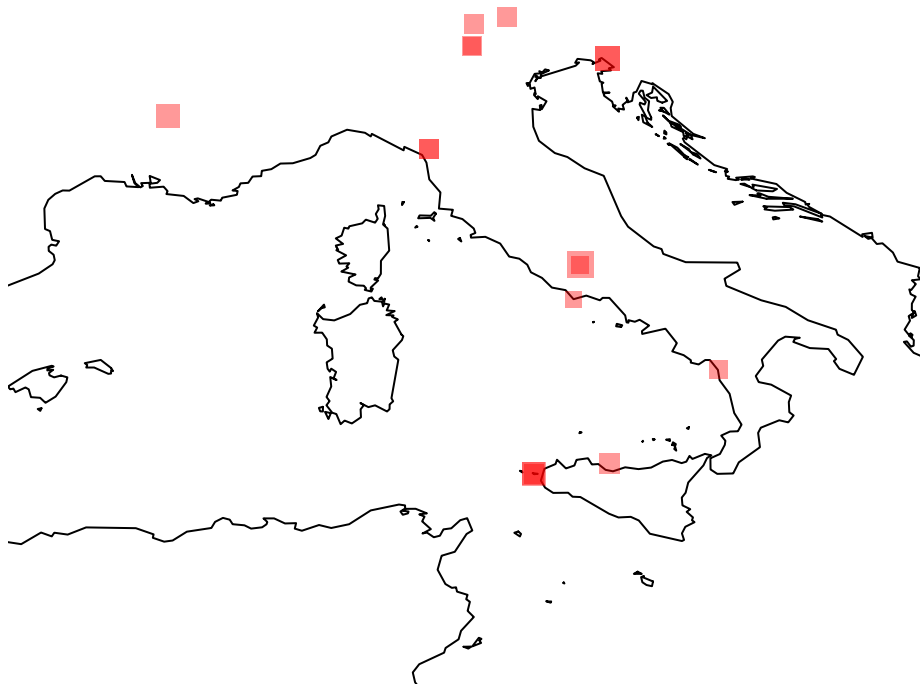

7670 cal. BC

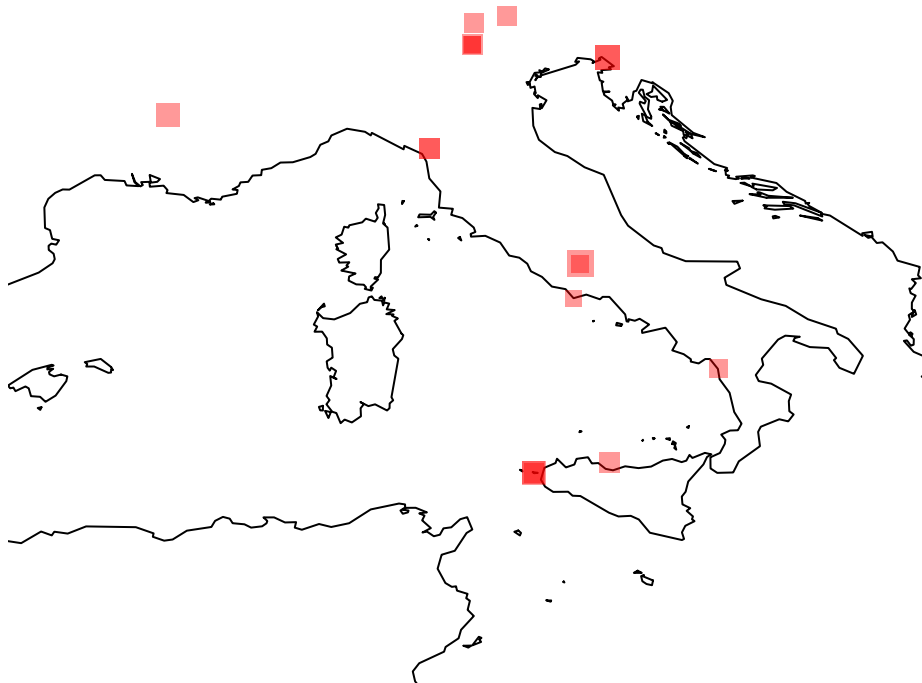

7665 cal. BC

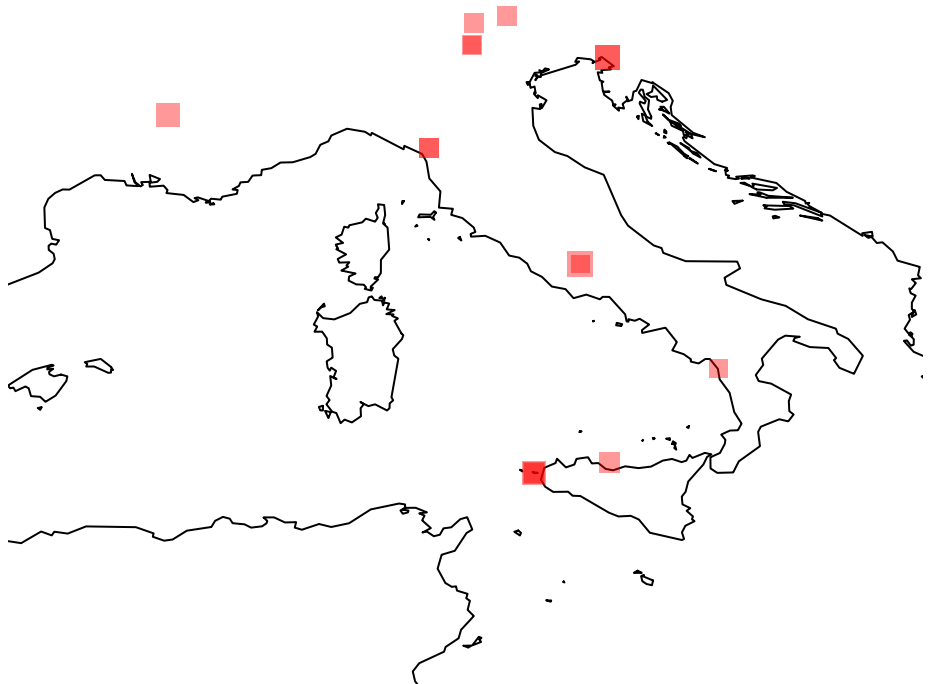

7660 cal. BC

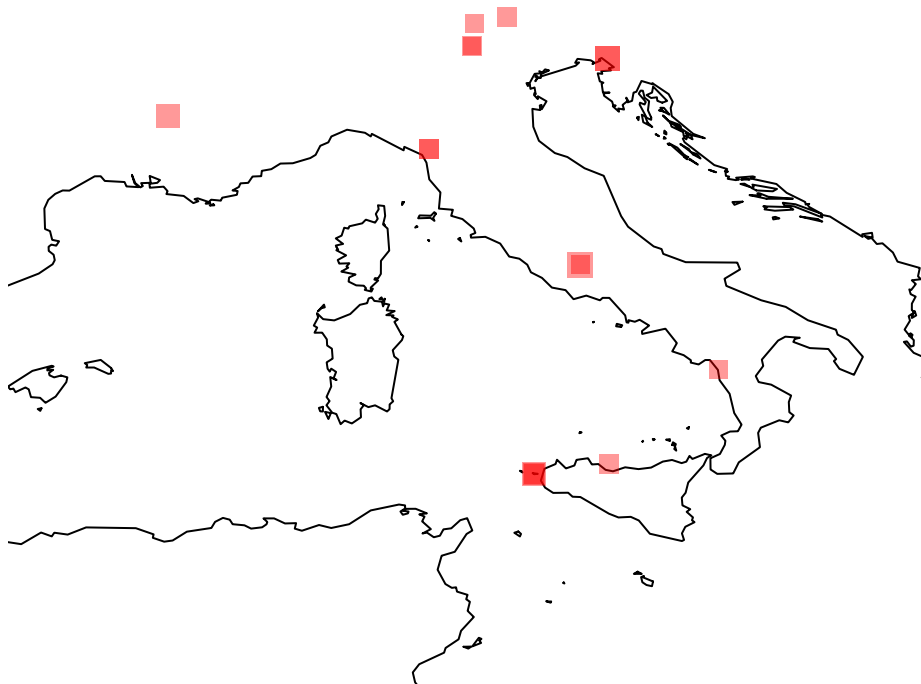

7655 cal. BC

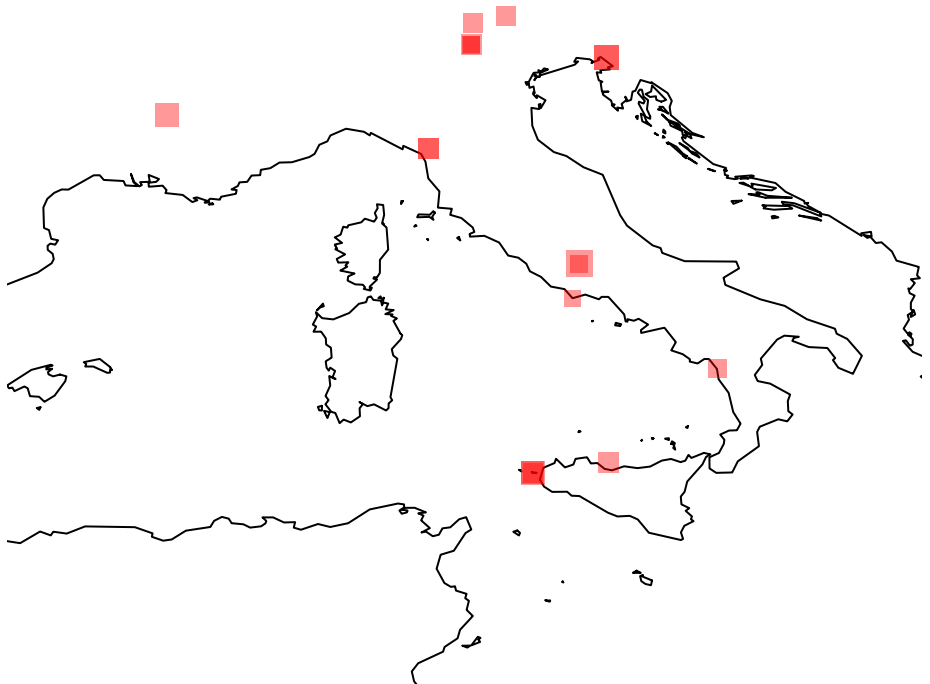

7650 cal. BC

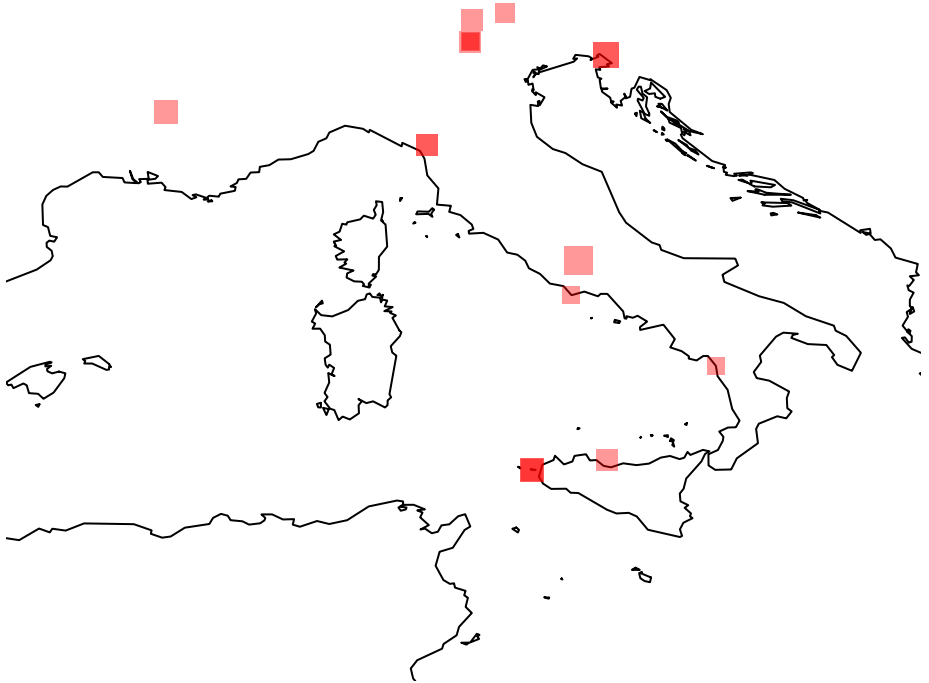



7645 cal. BC

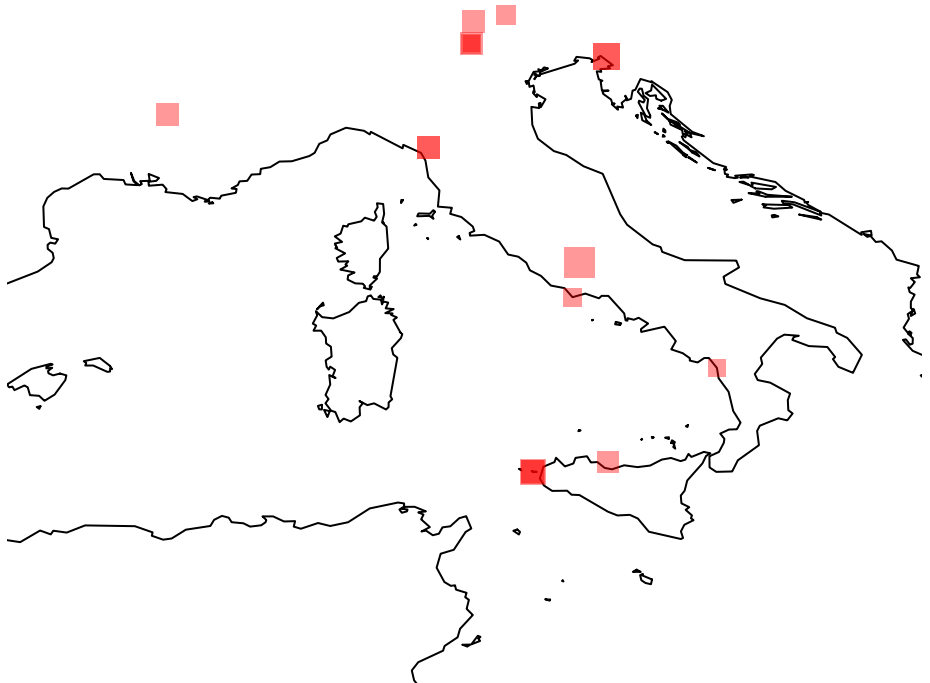

7640 cal. BC

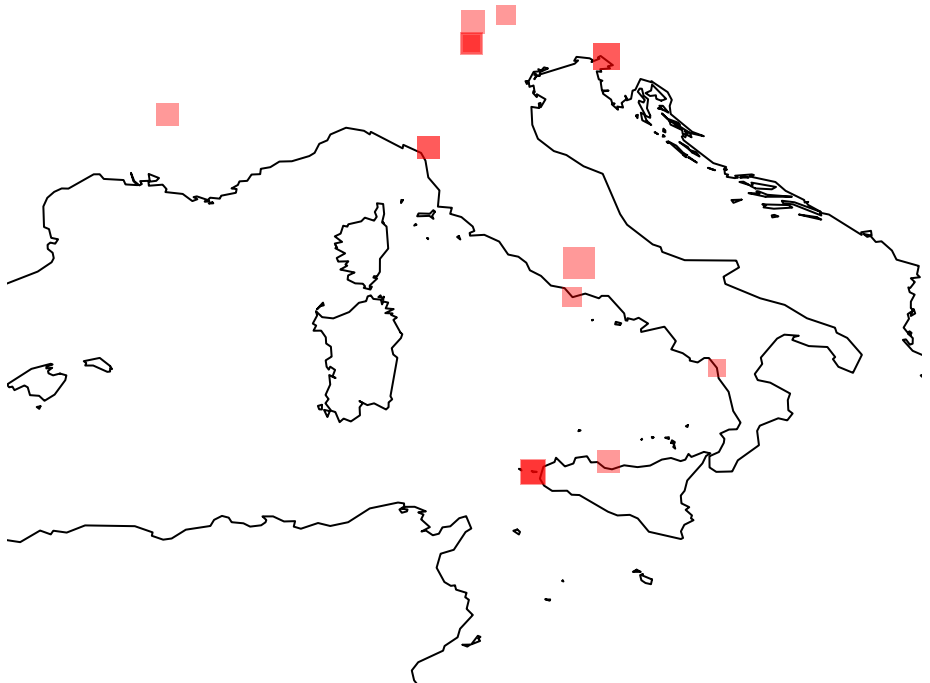

7635 cal. BC

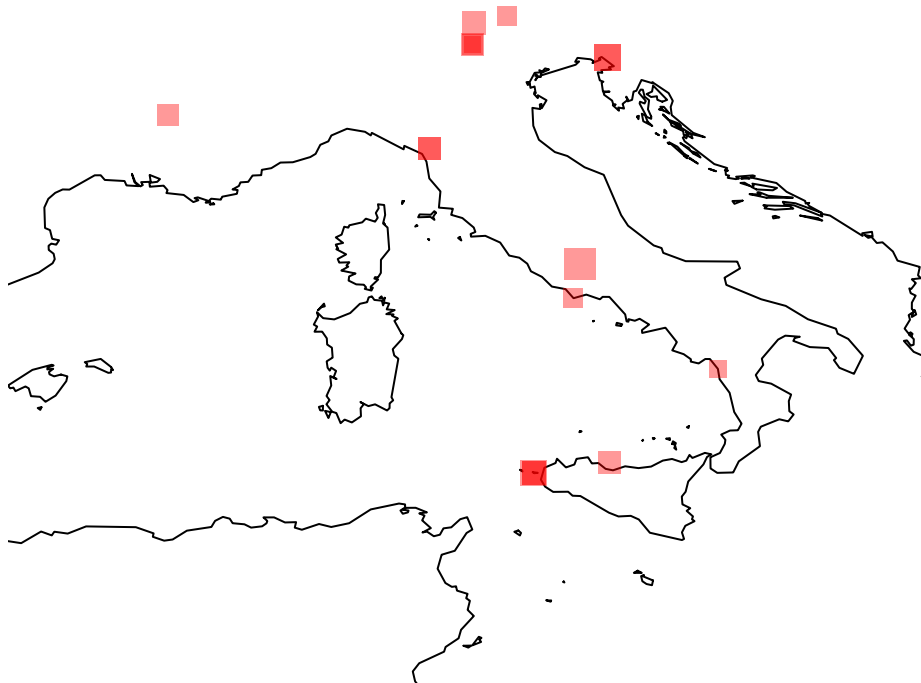

7630 cal. BC

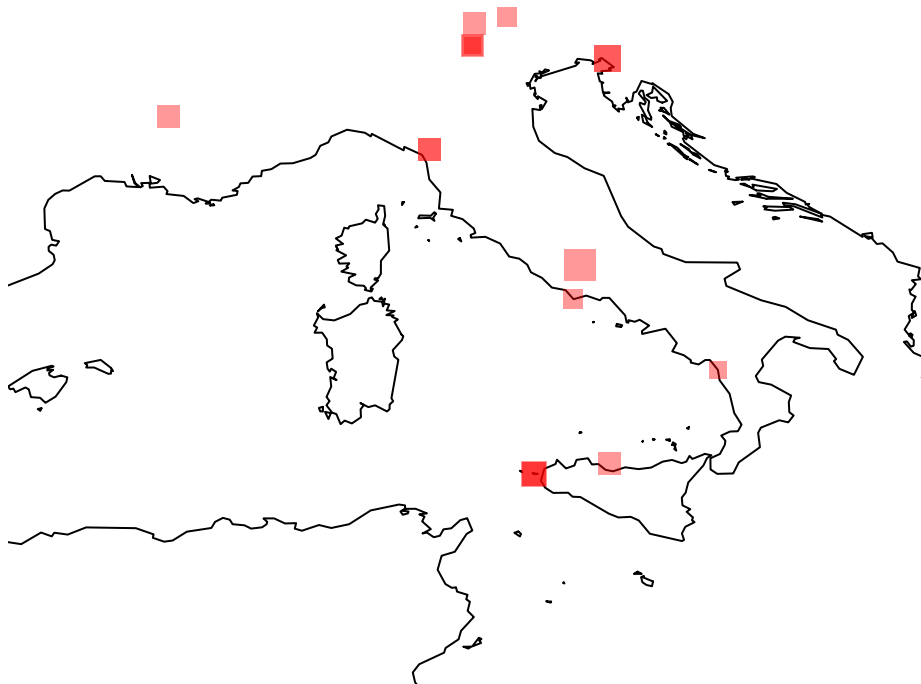

7625 cal. BC

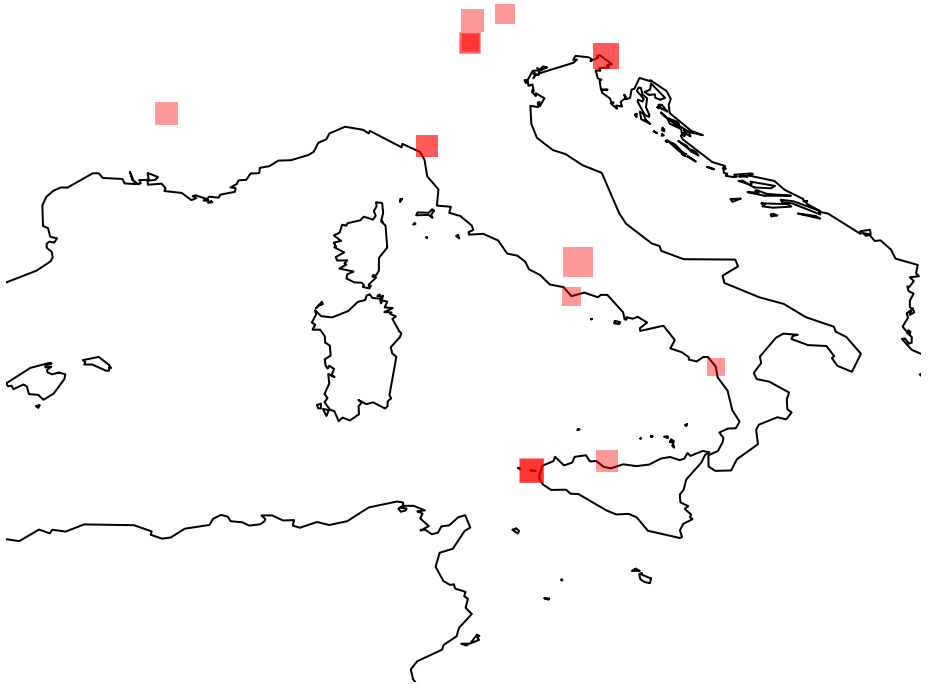

7620 cal. BC

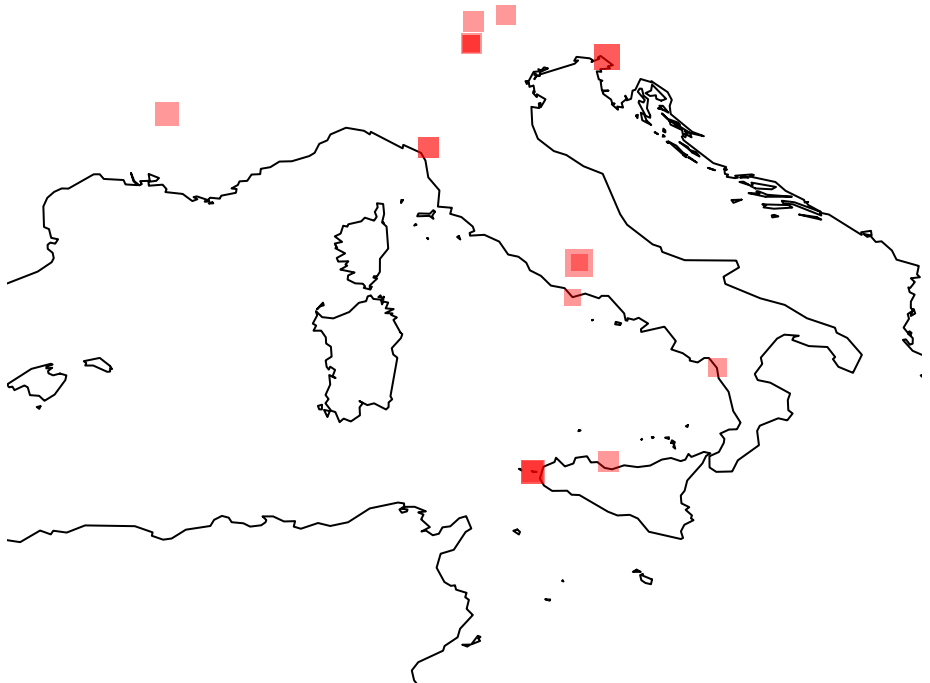

7615 cal. BC

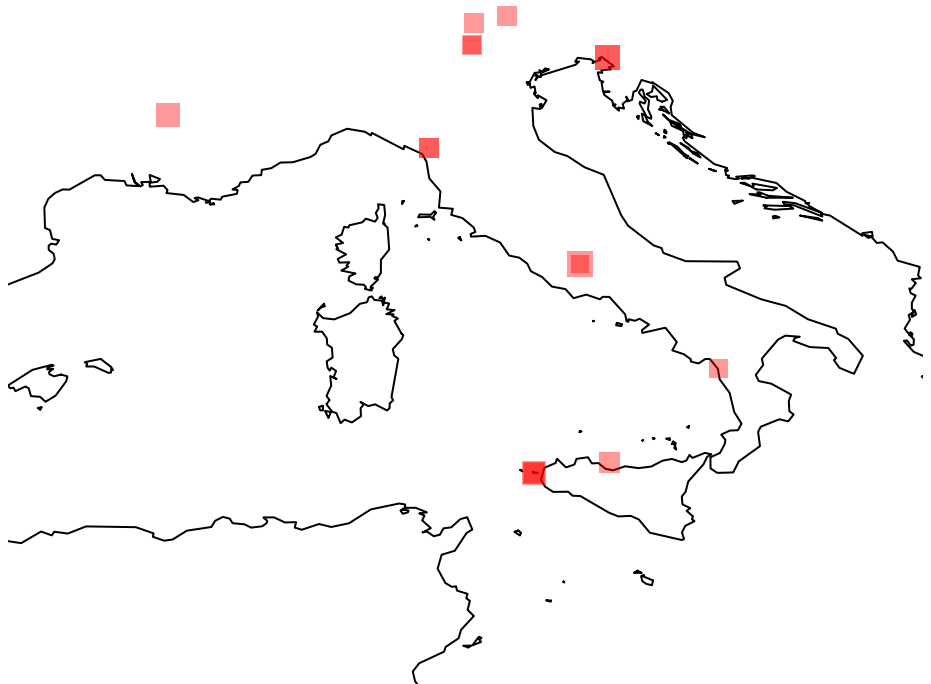

7610 cal. BC

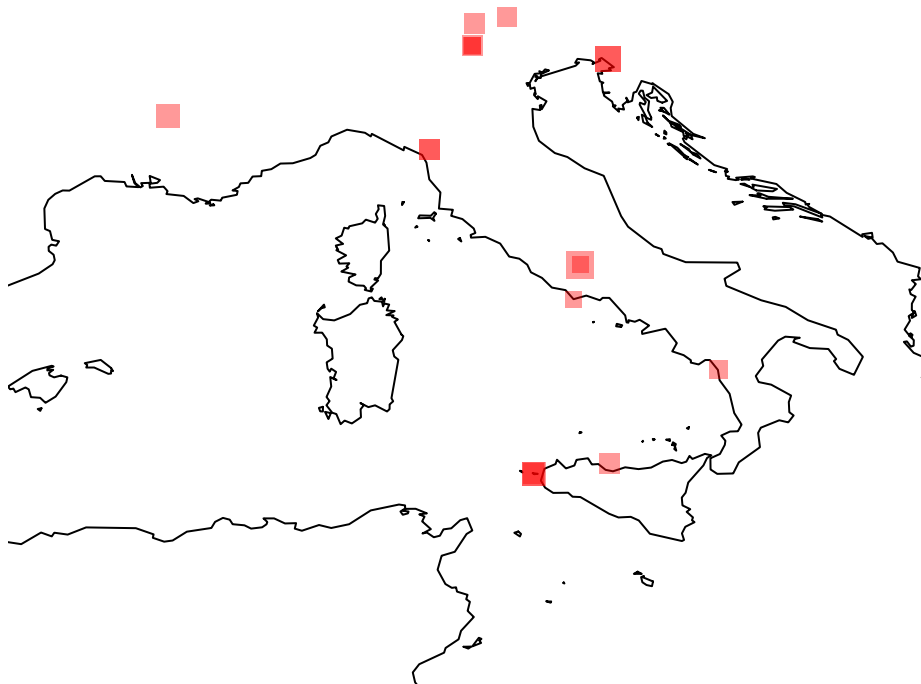



7605 cal. BC

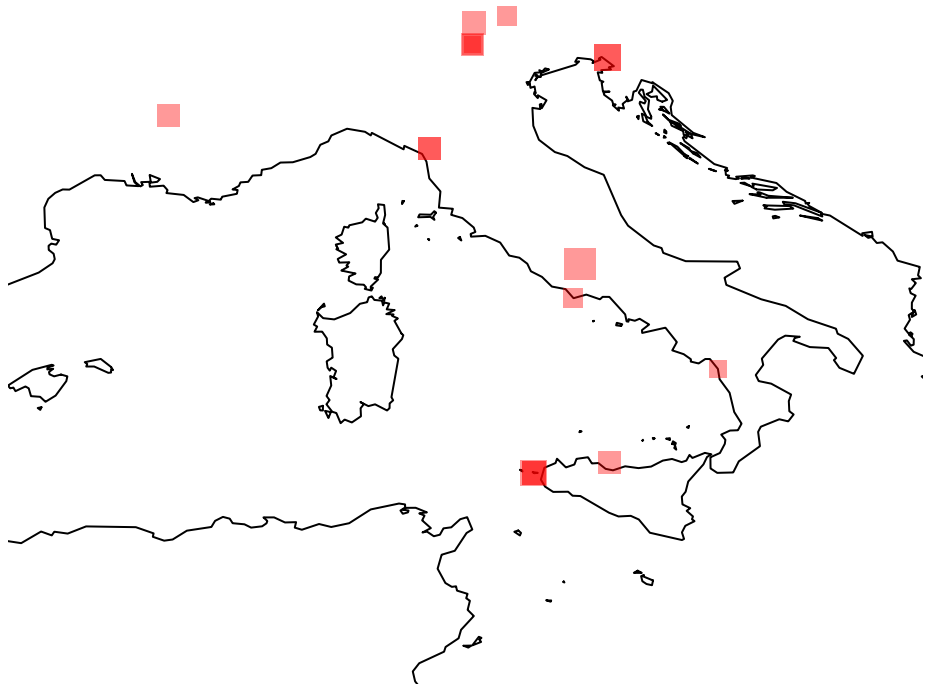

7600 cal. BC

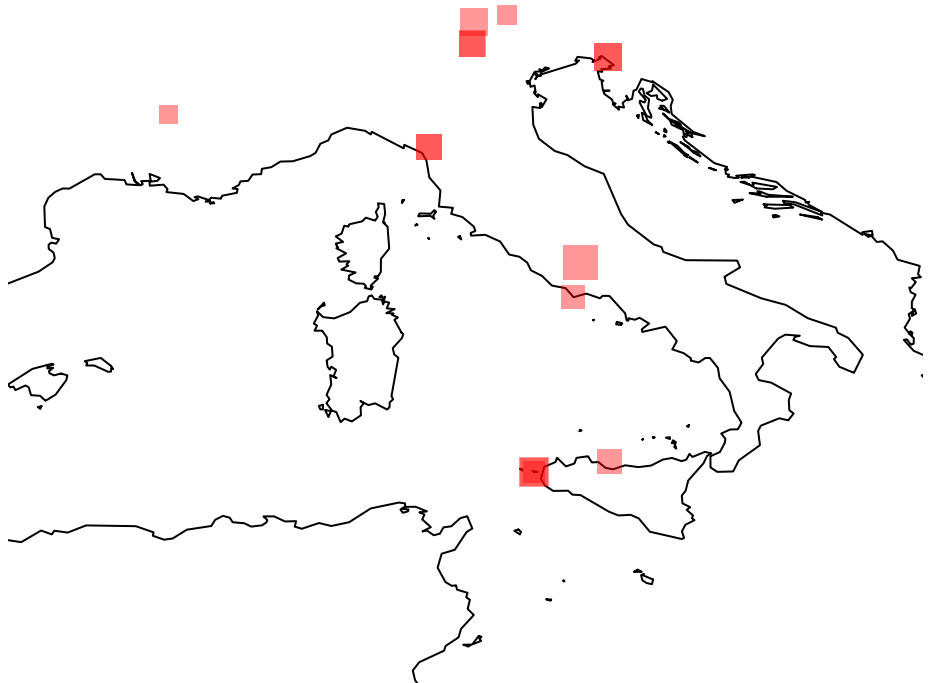



7590 cal. BC

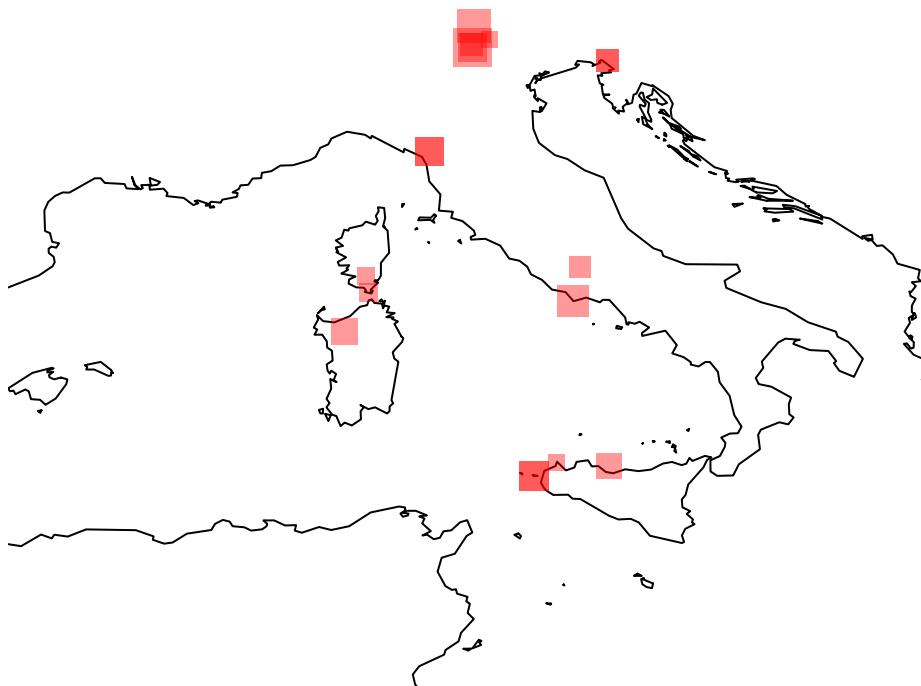

7585 cal. BC

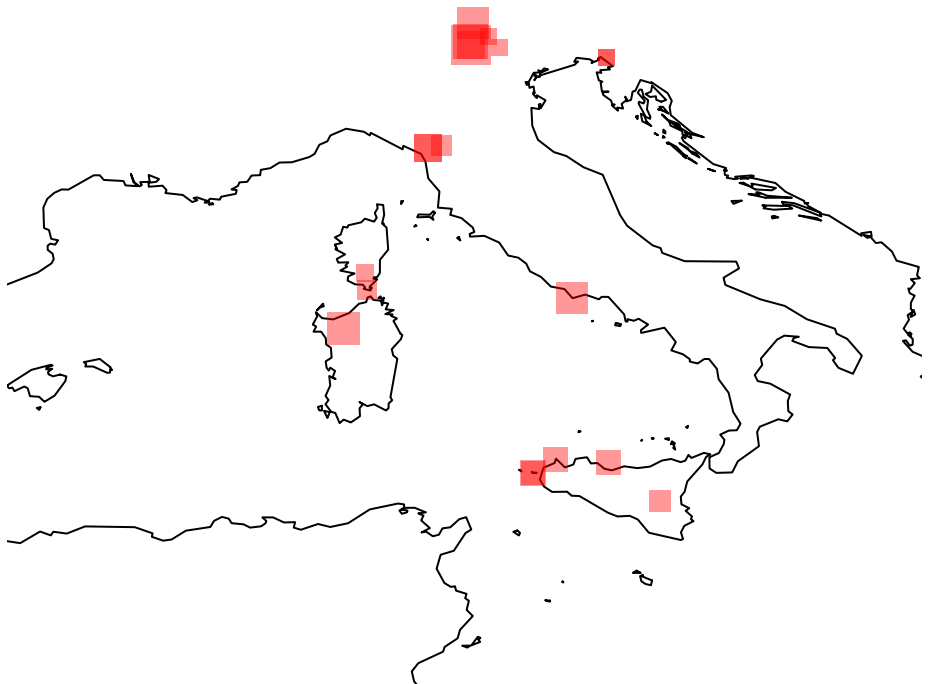

**7580 cal. BC**

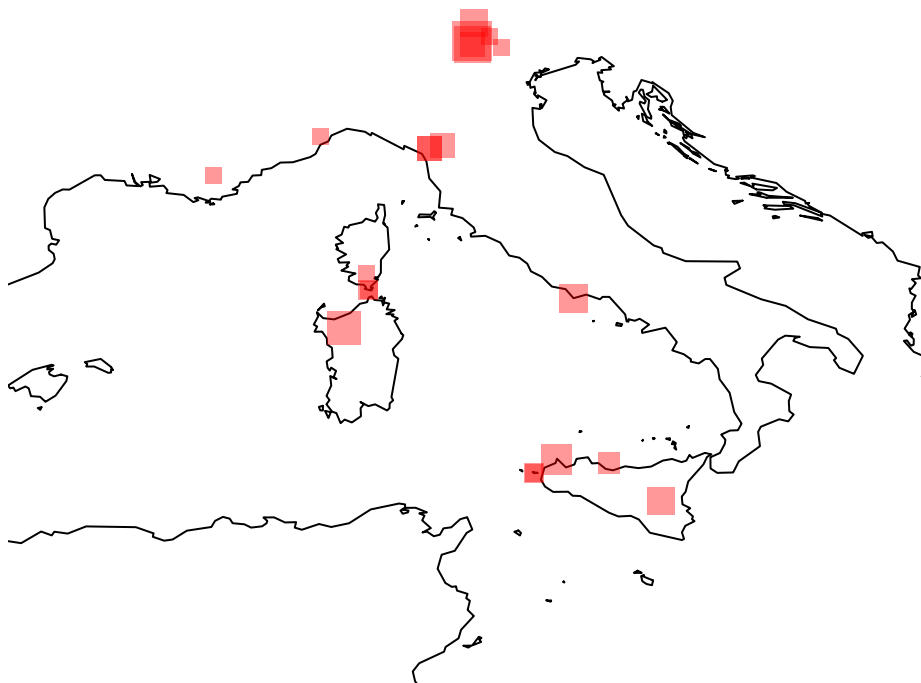

7575 cal. BC

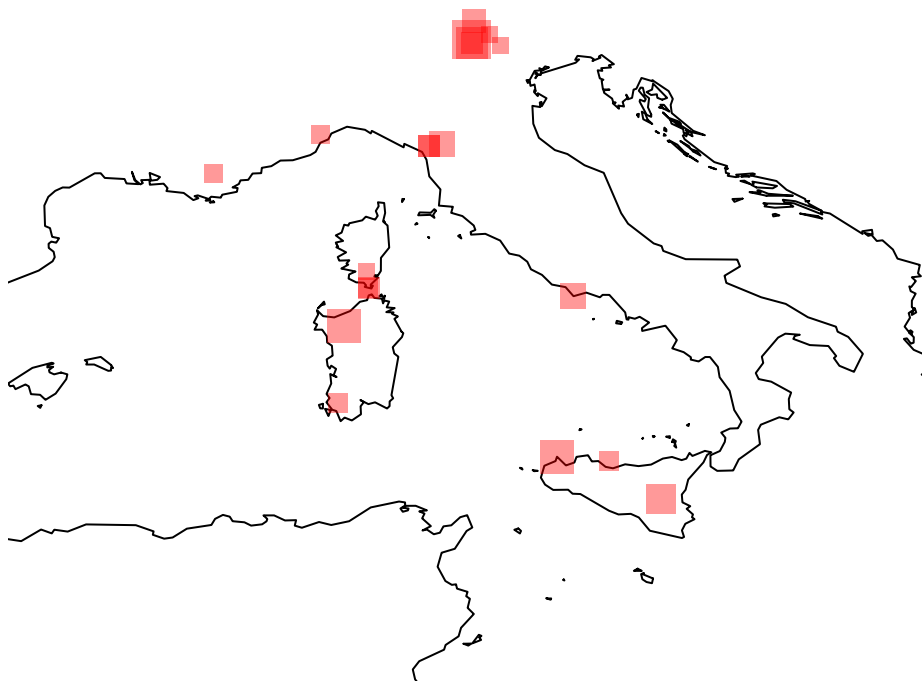

7570 cal. BC

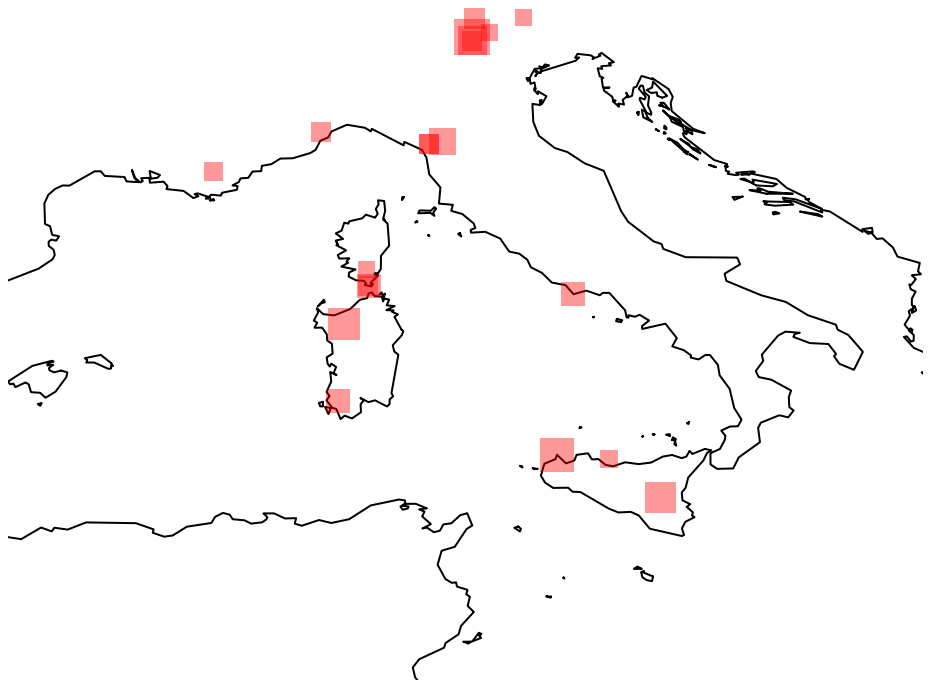



7565 cal. BC

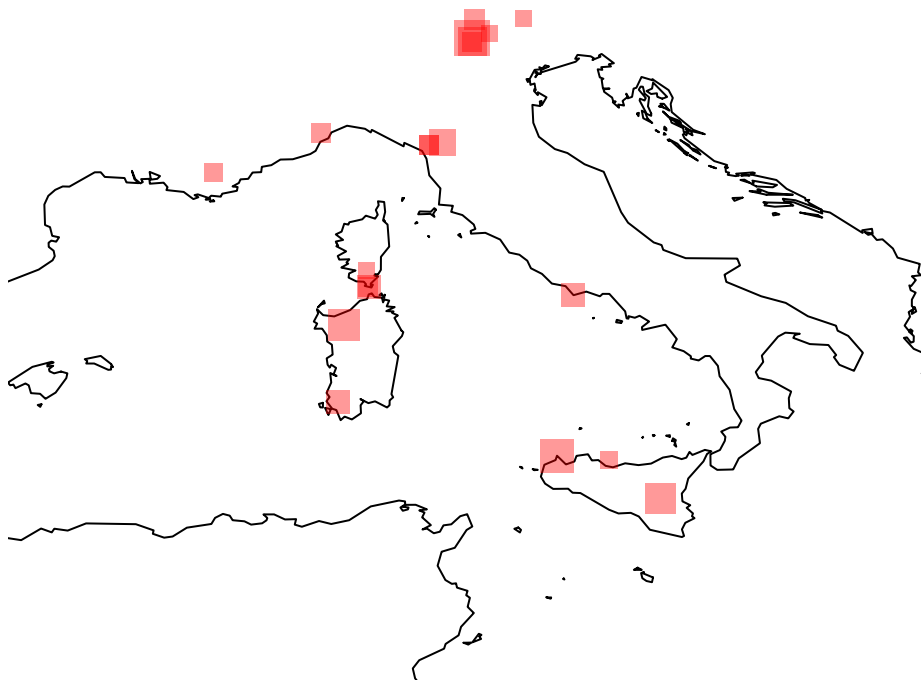

7560 cal. BC

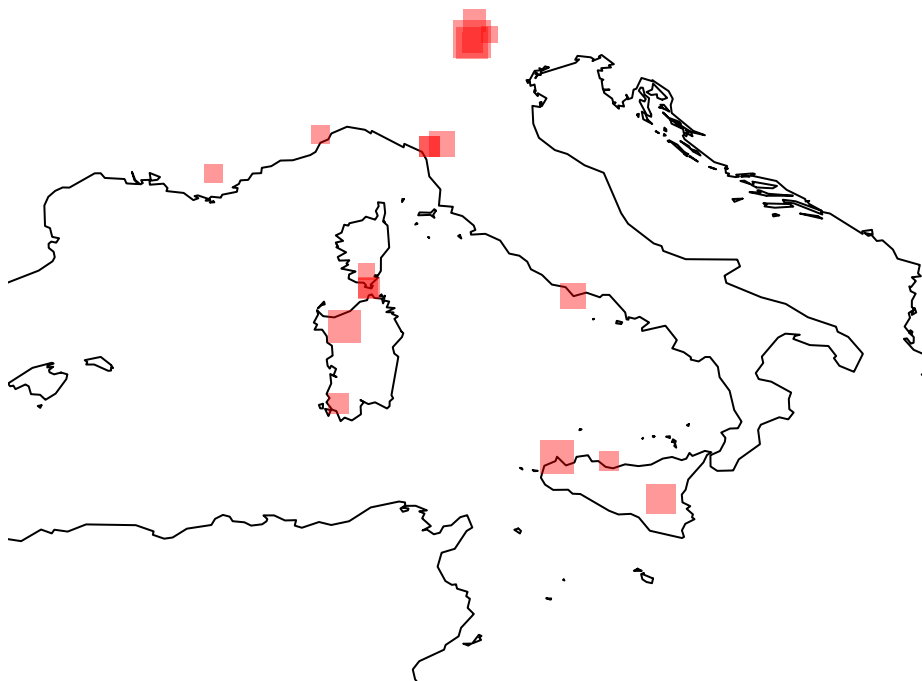



7550 cal. BC

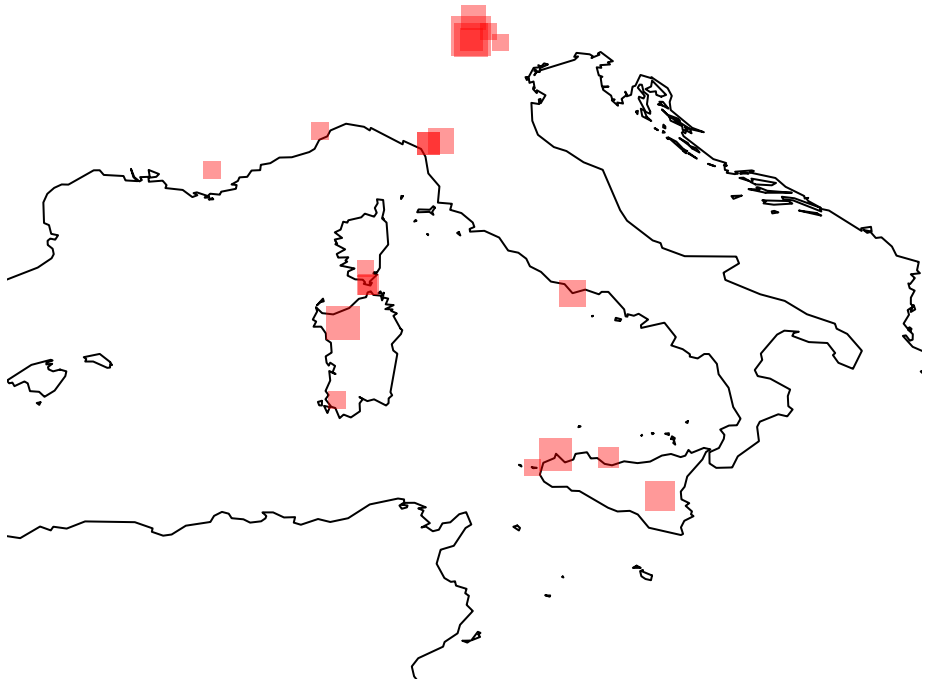

7545 cal. BC

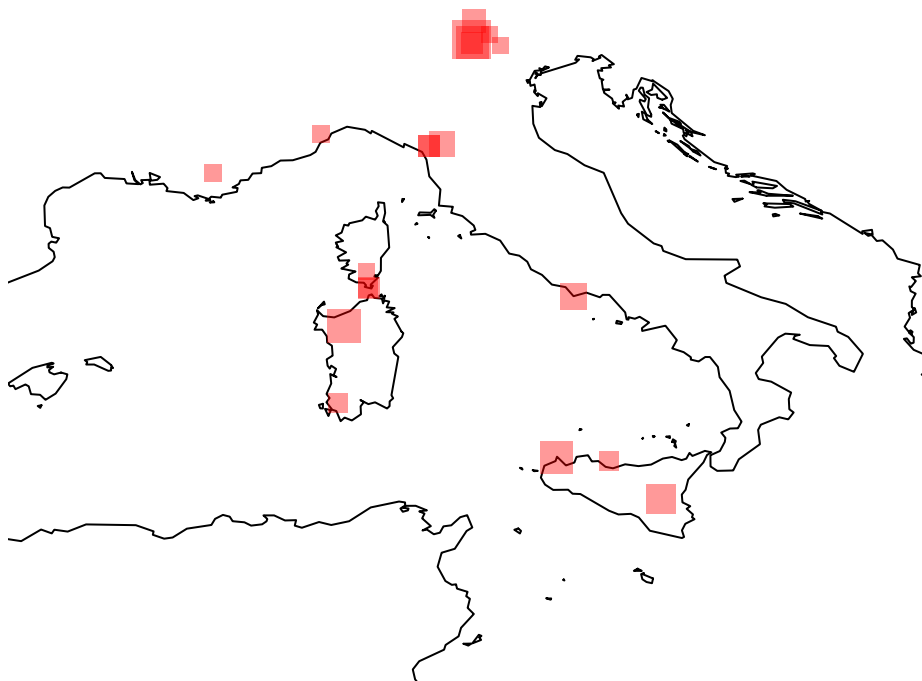

7540 cal. BC

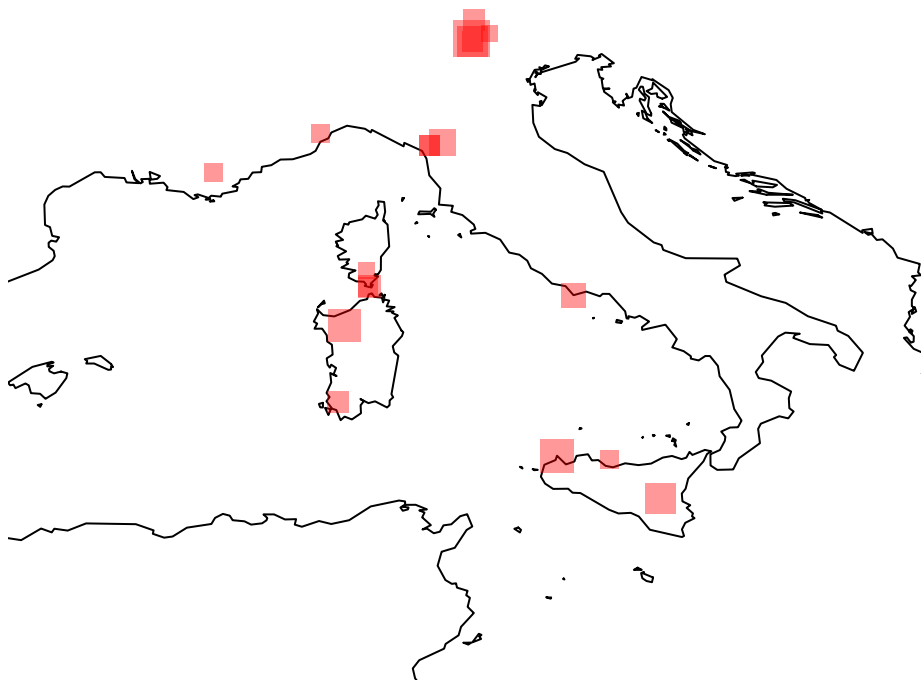

7535 cal. BC

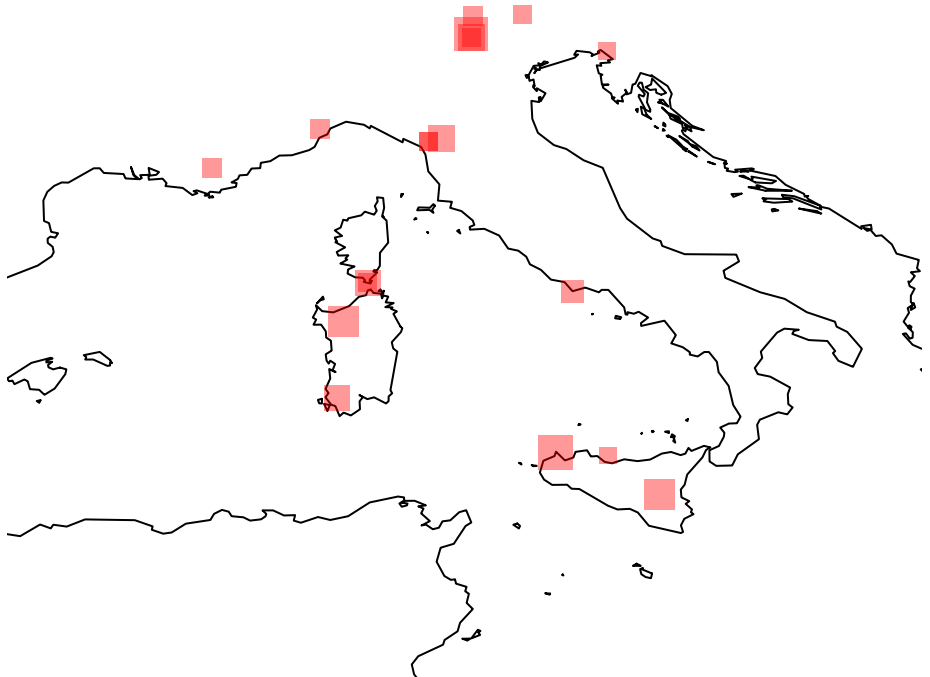

7530 cal. BC

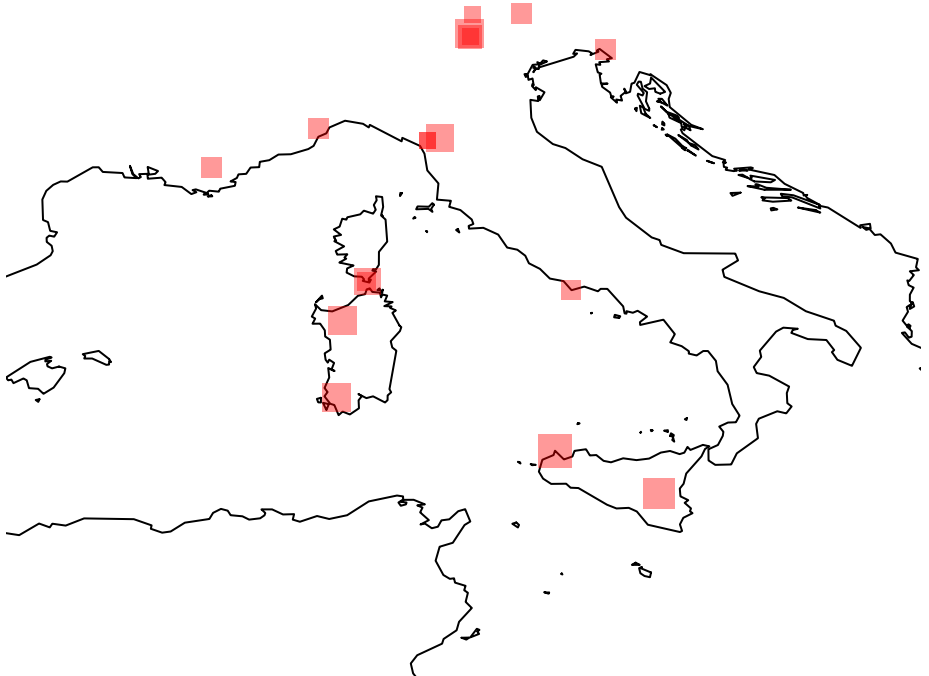



7525 cal. BC

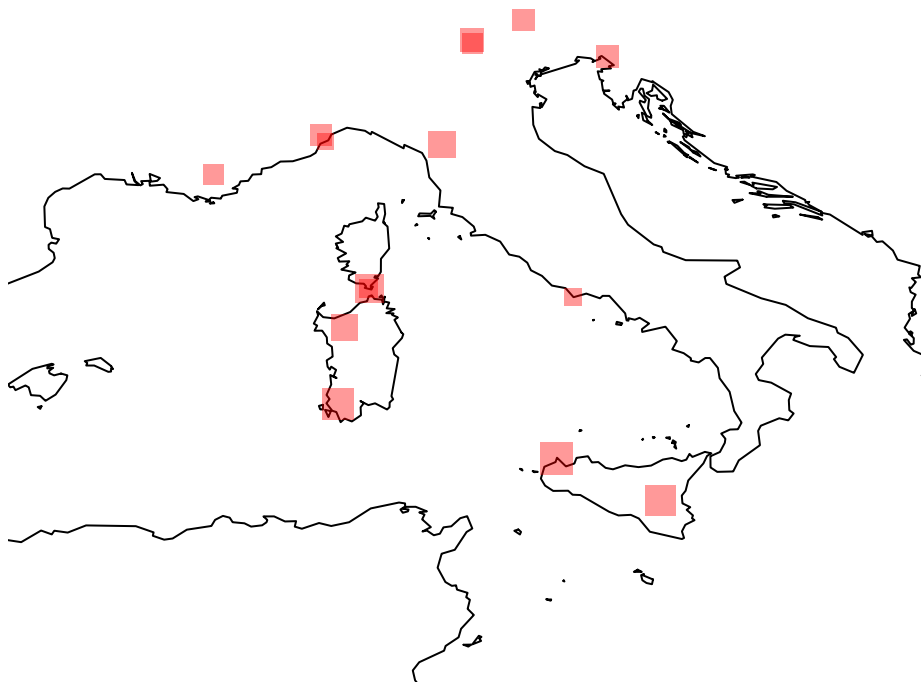

7520 cal. BC

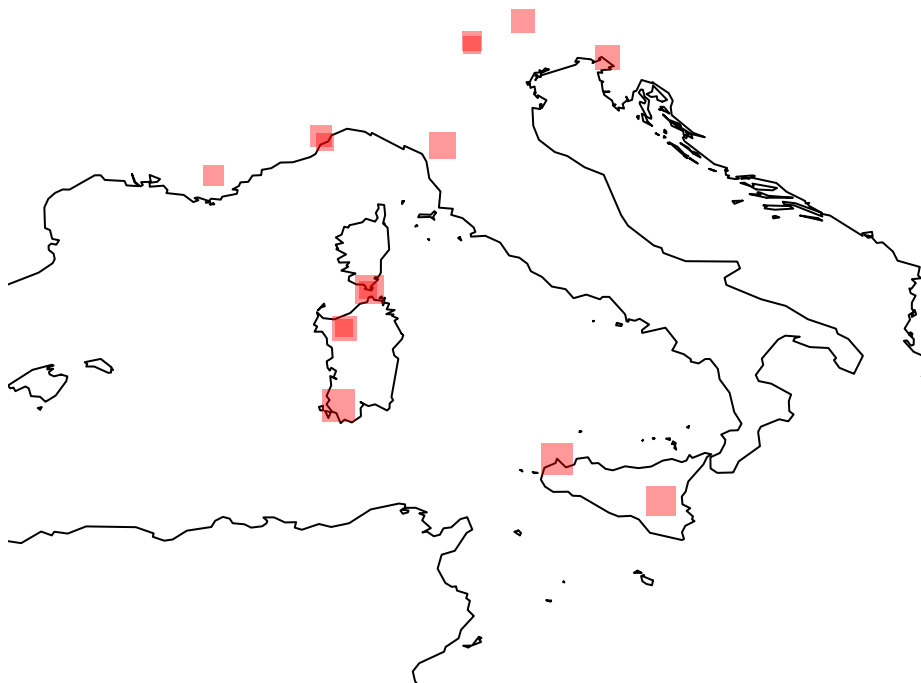



7510 cal. BC

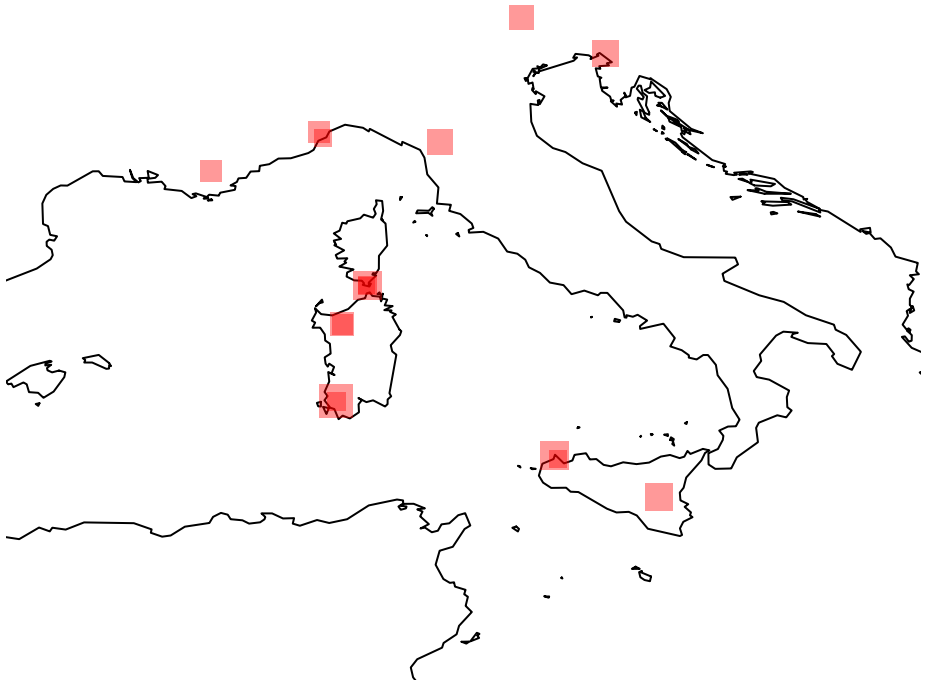

7505 cal. BC

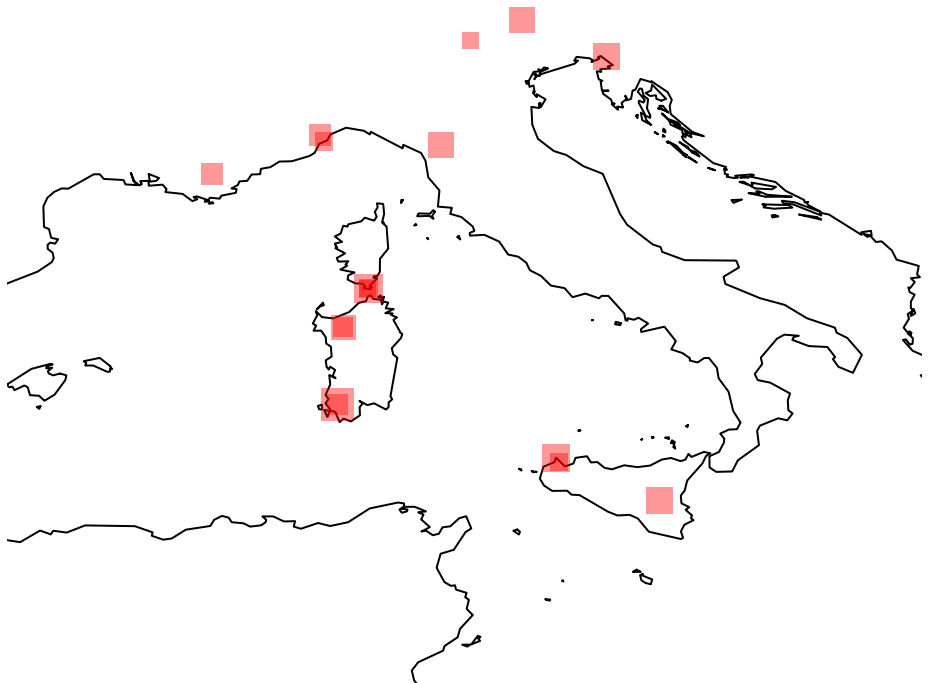

7500 cal. BC

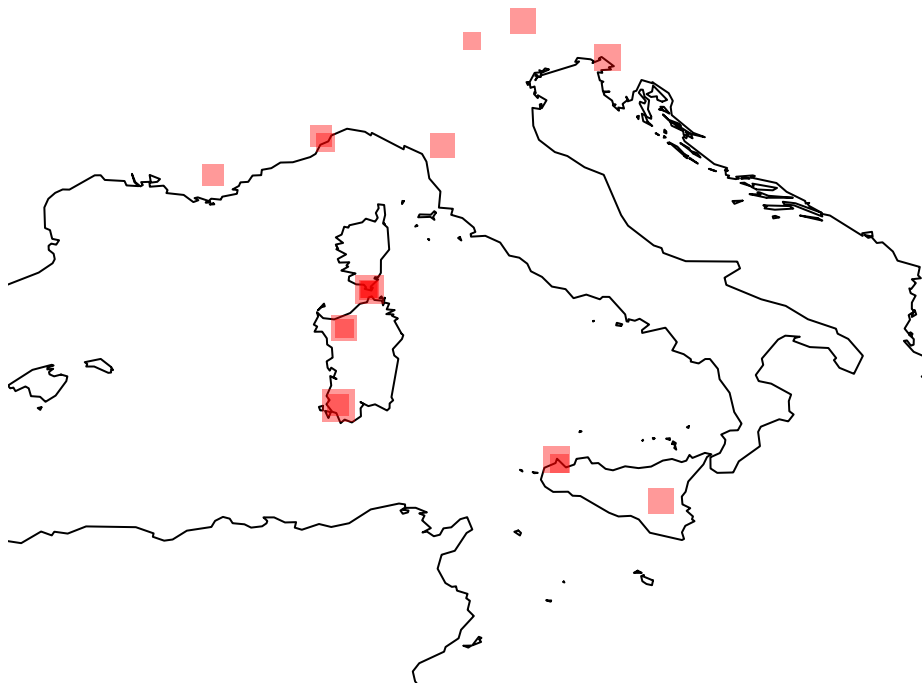



7490 cal. BC

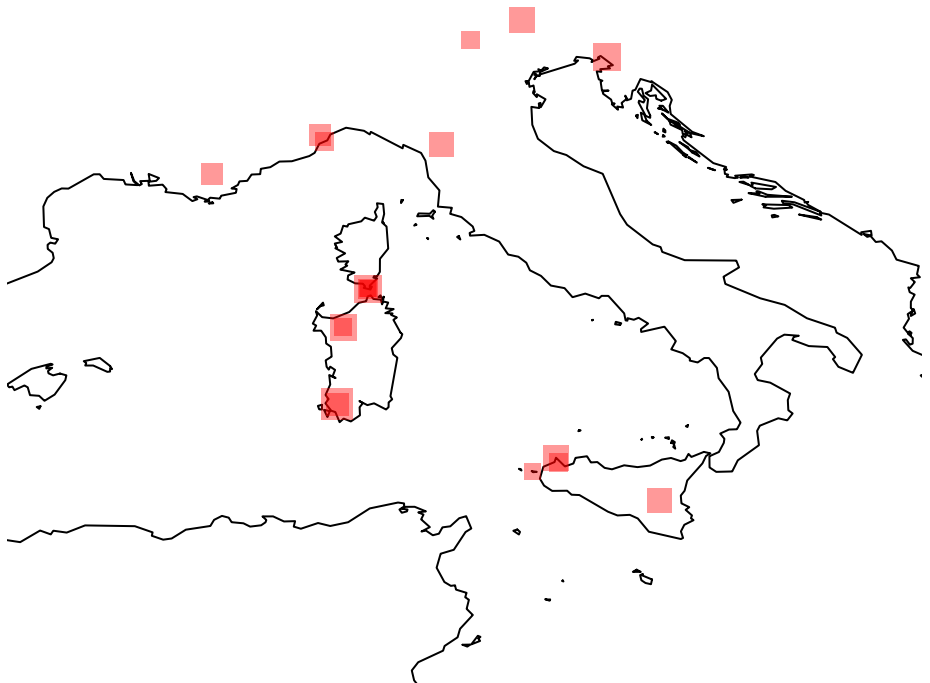



7485 cal. BC

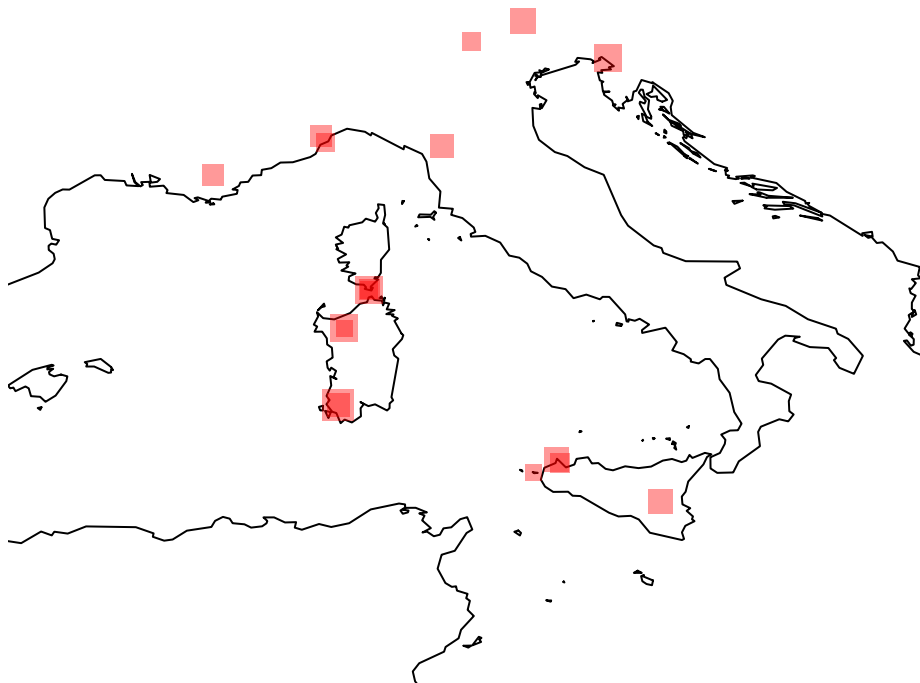

7480 cal. BC

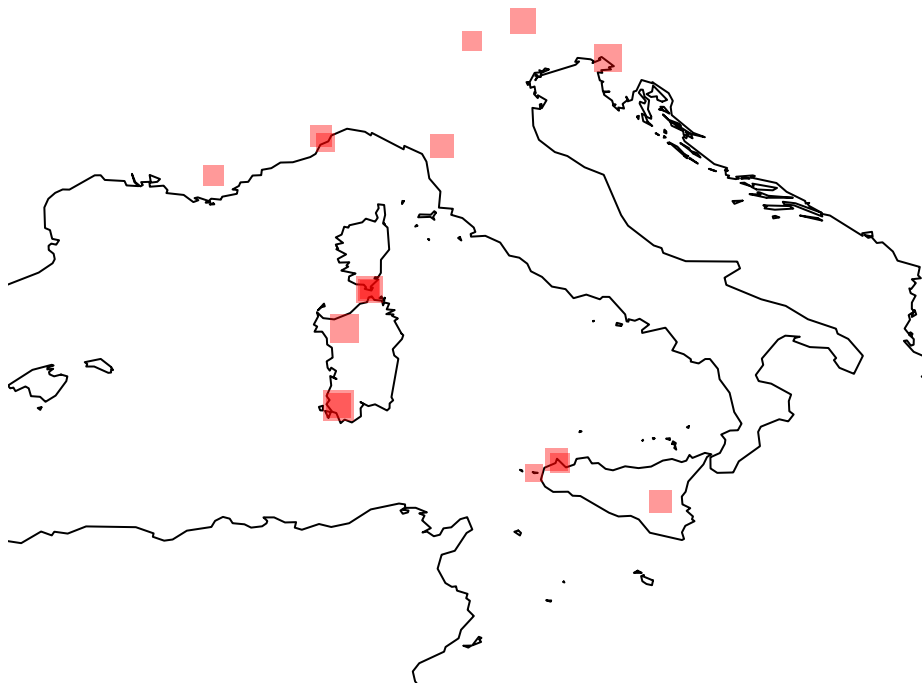

7475 cal. BC

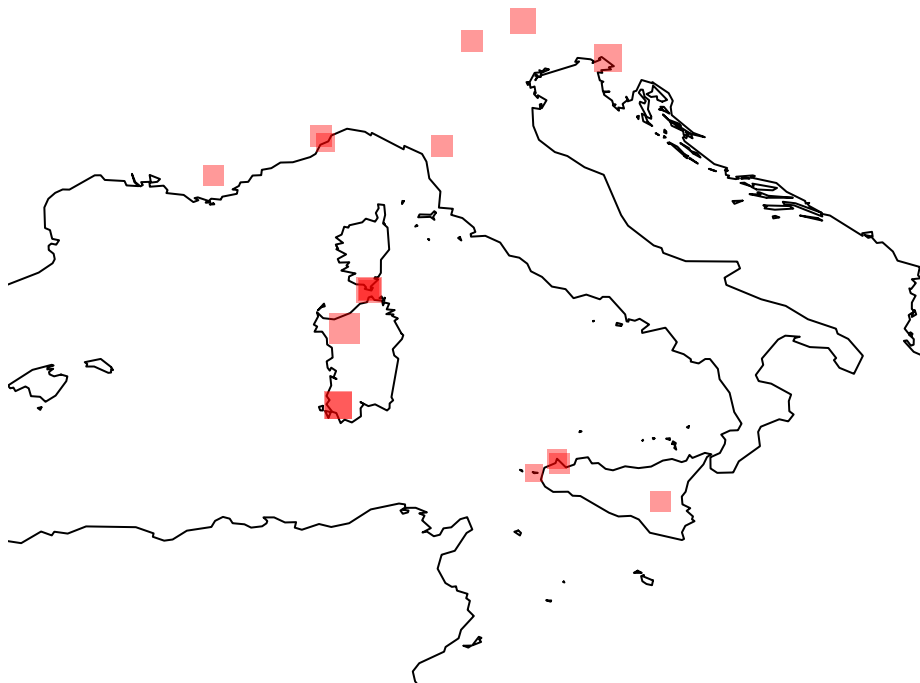

7470 cal. BC

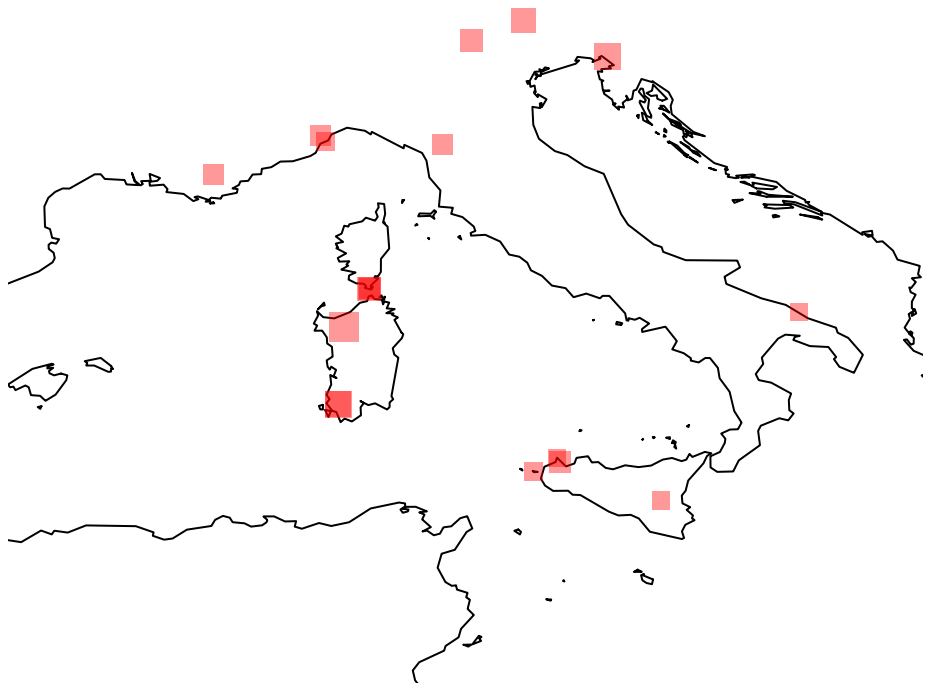



7460 cal. BC

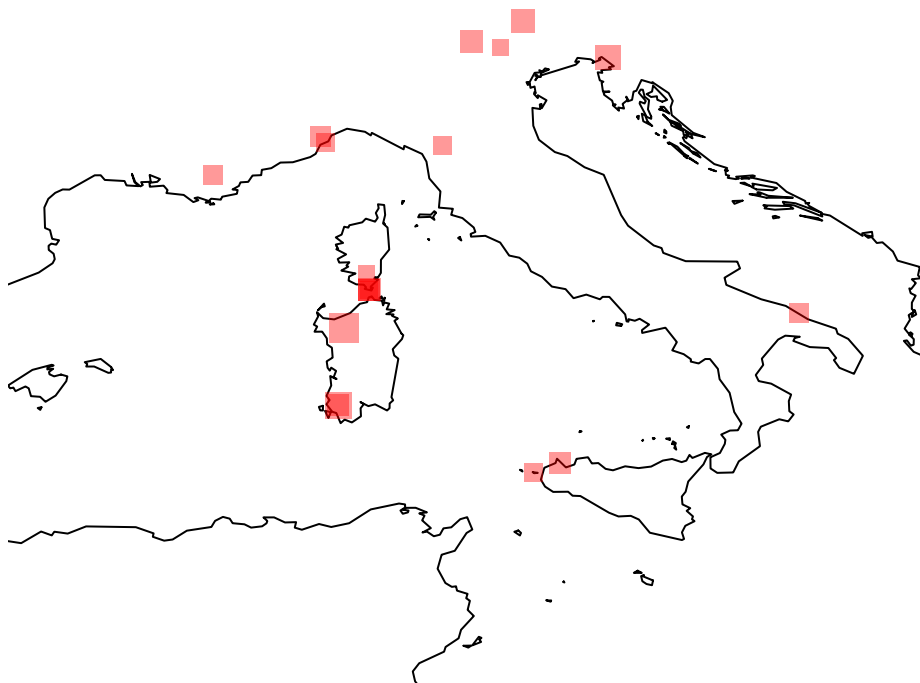



7450 cal. BC

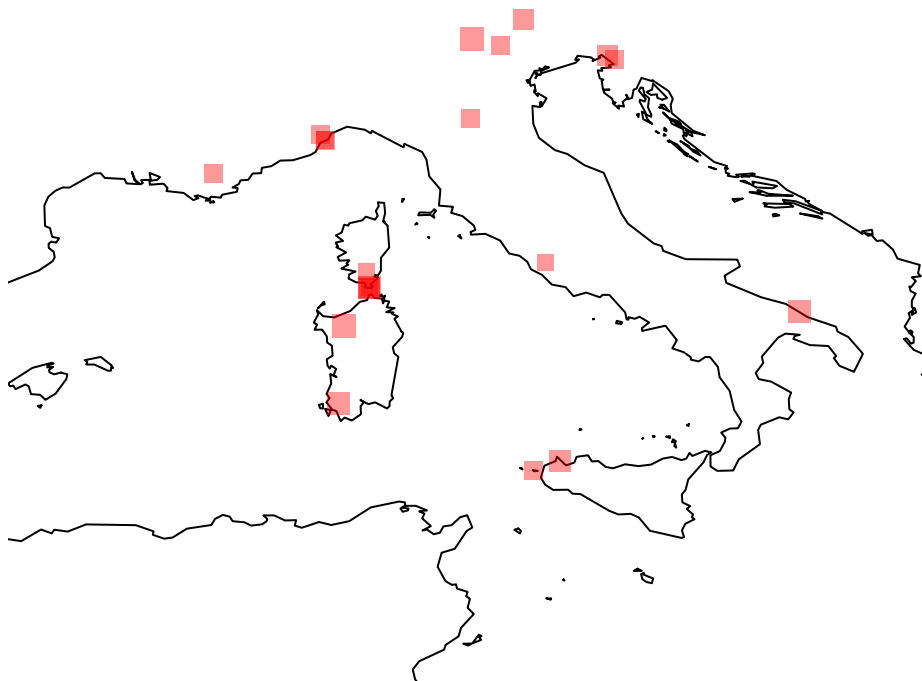



7445 cal. BC

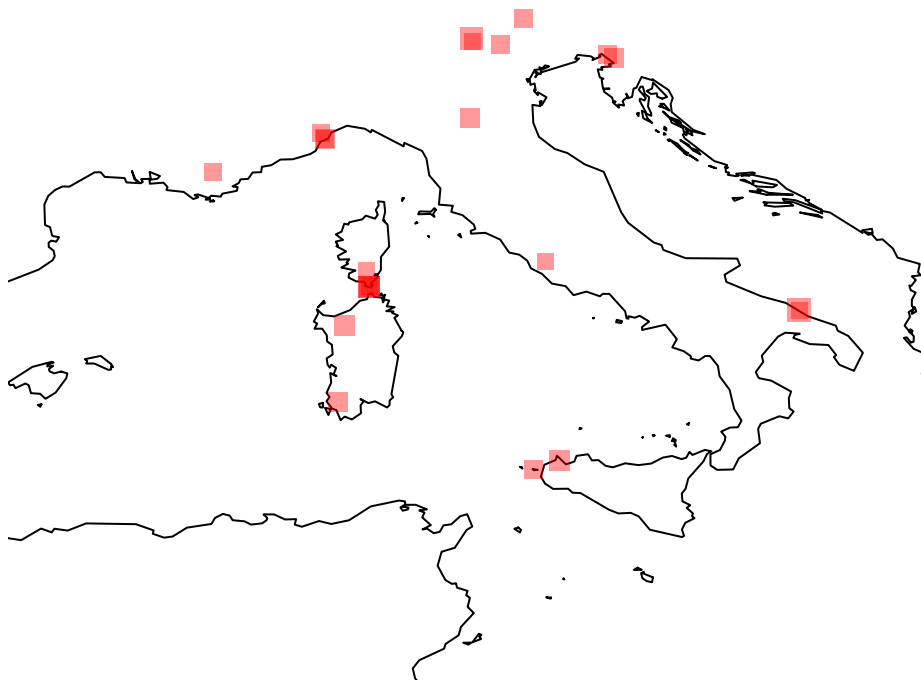

7440 cal. BC

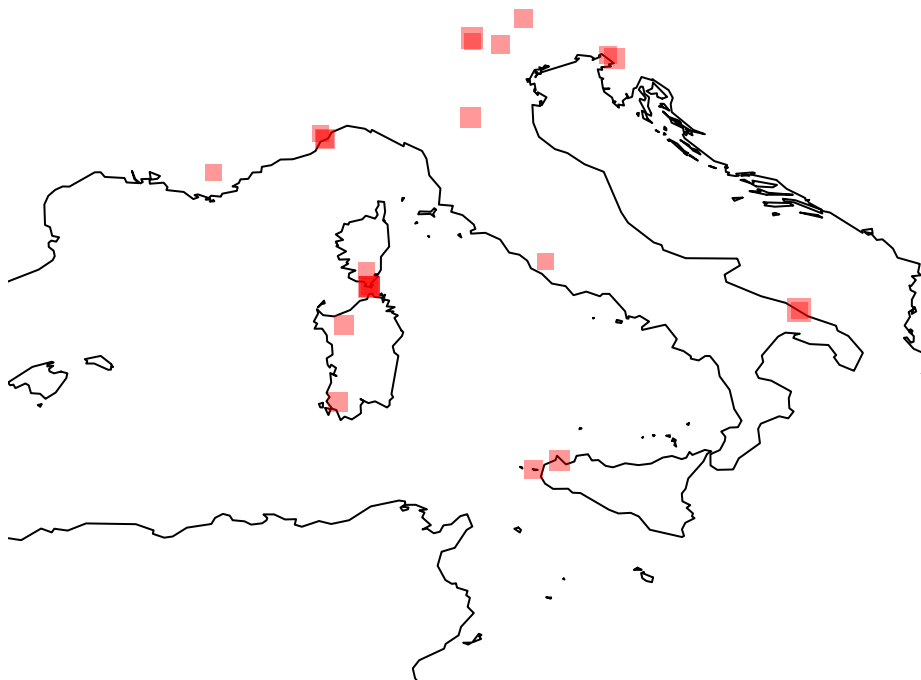

7435 cal. BC

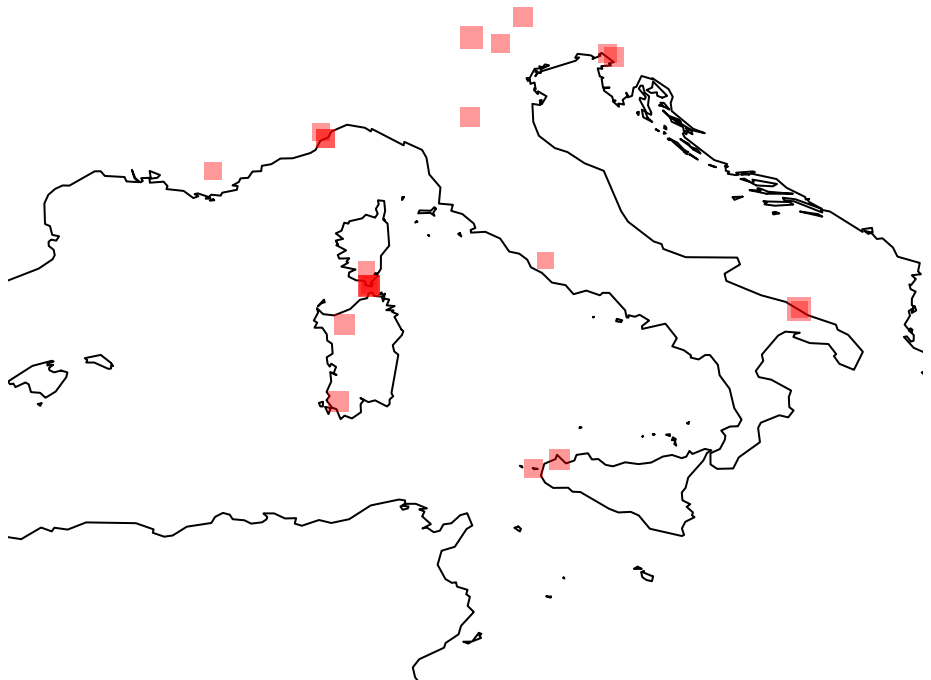

7430 cal. BC

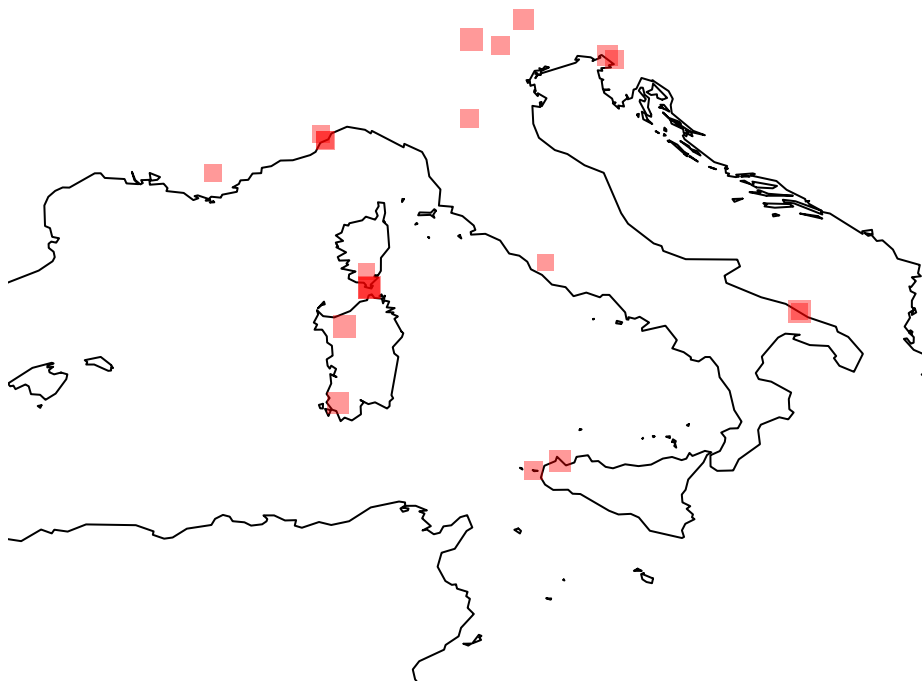

7425 cal. BC

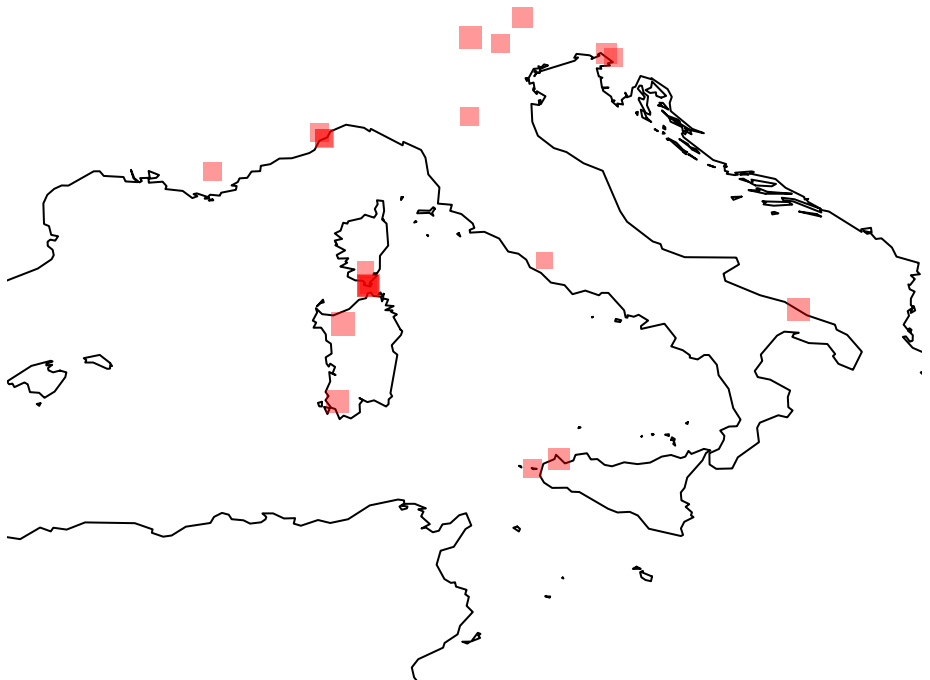

7420 cal. BC

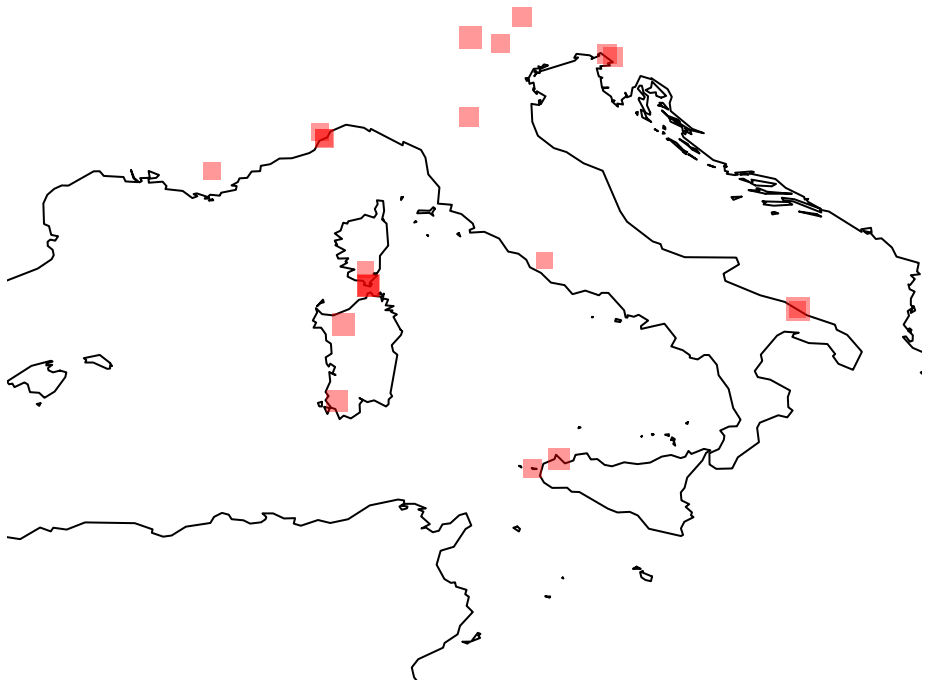

7415 cal. BC

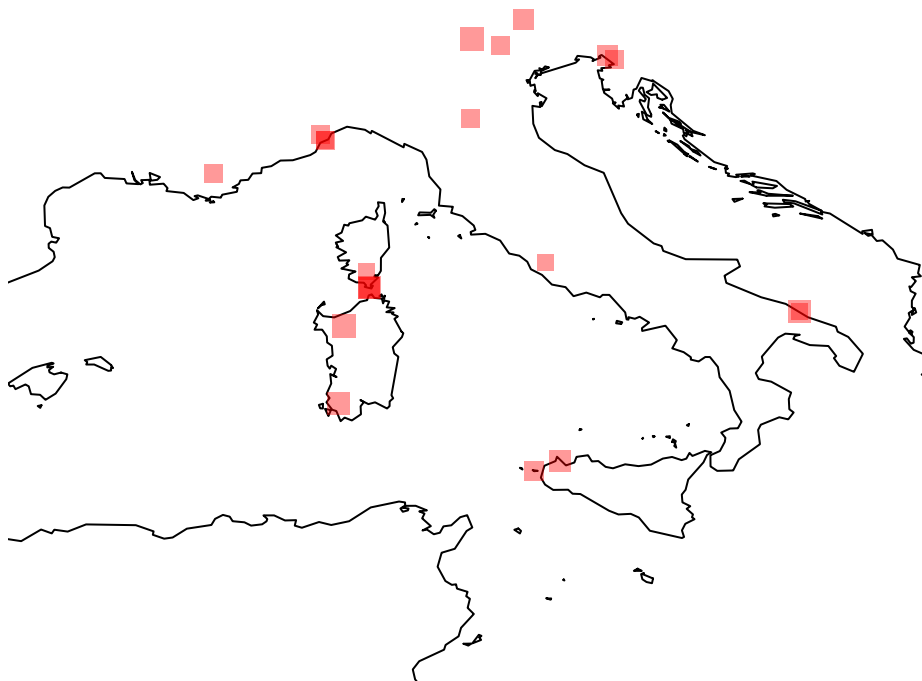

7410 cal. BC

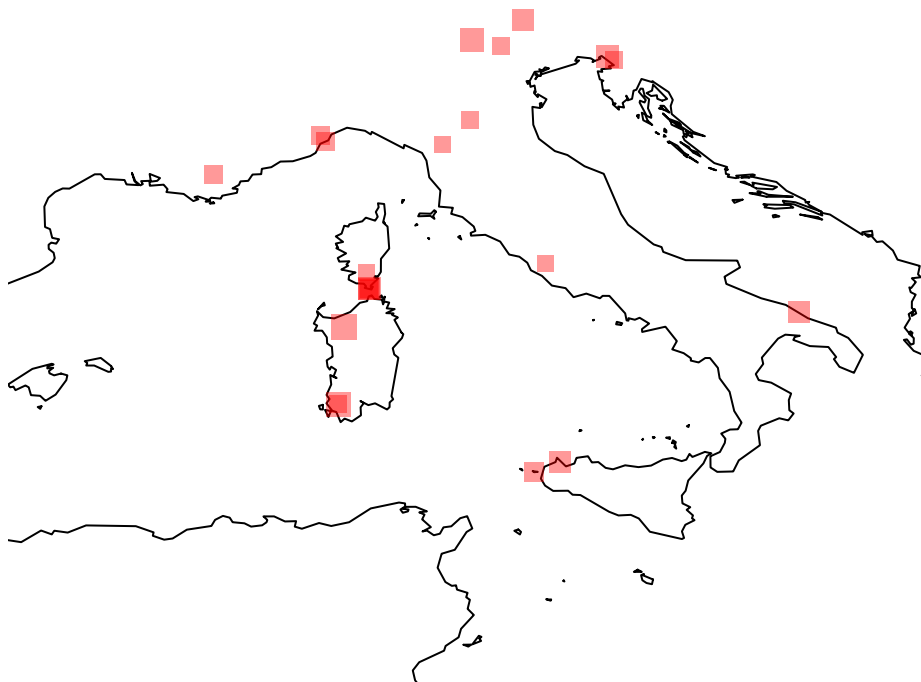



**7405 cal. BC**

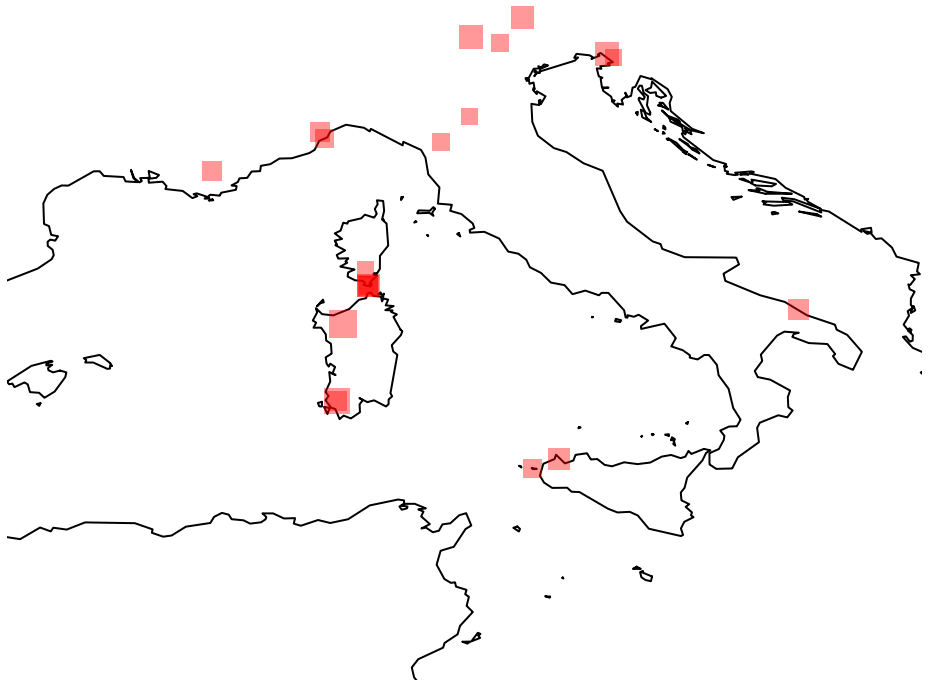

7400 cal. BC

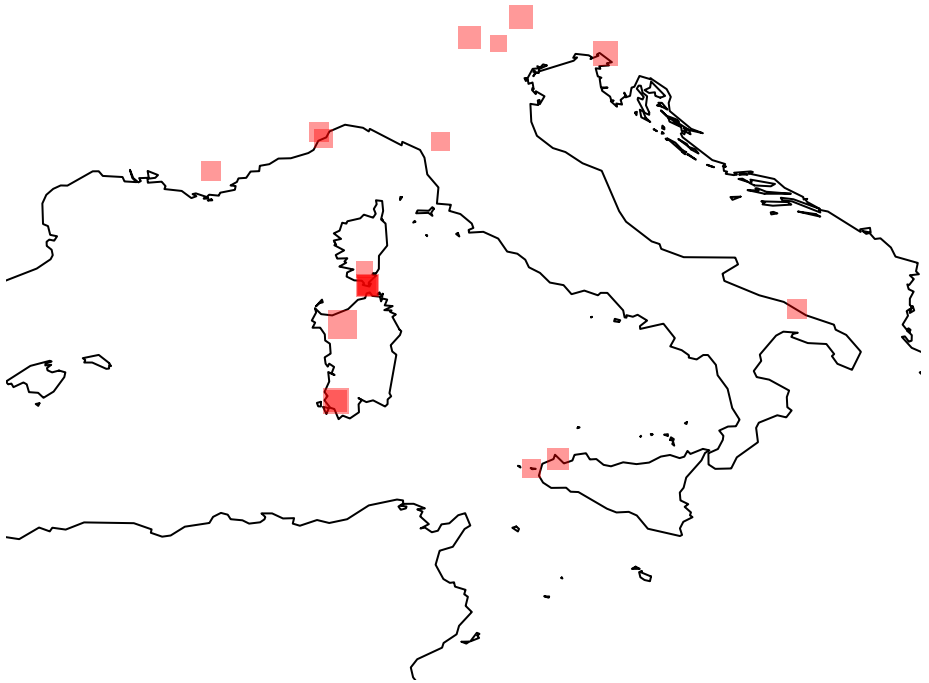

7395 cal. BC

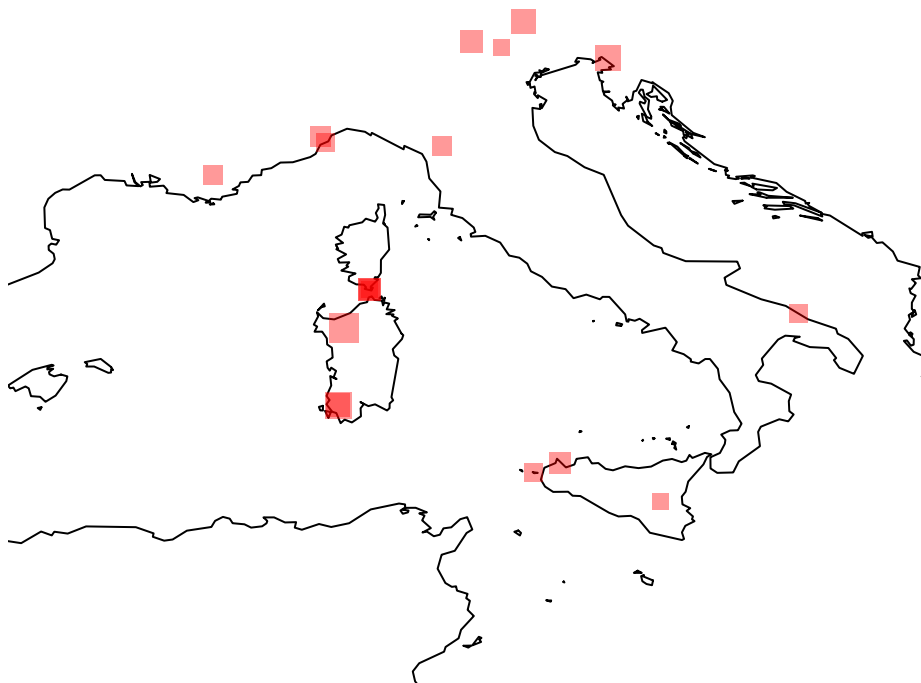

7390 cal. BC

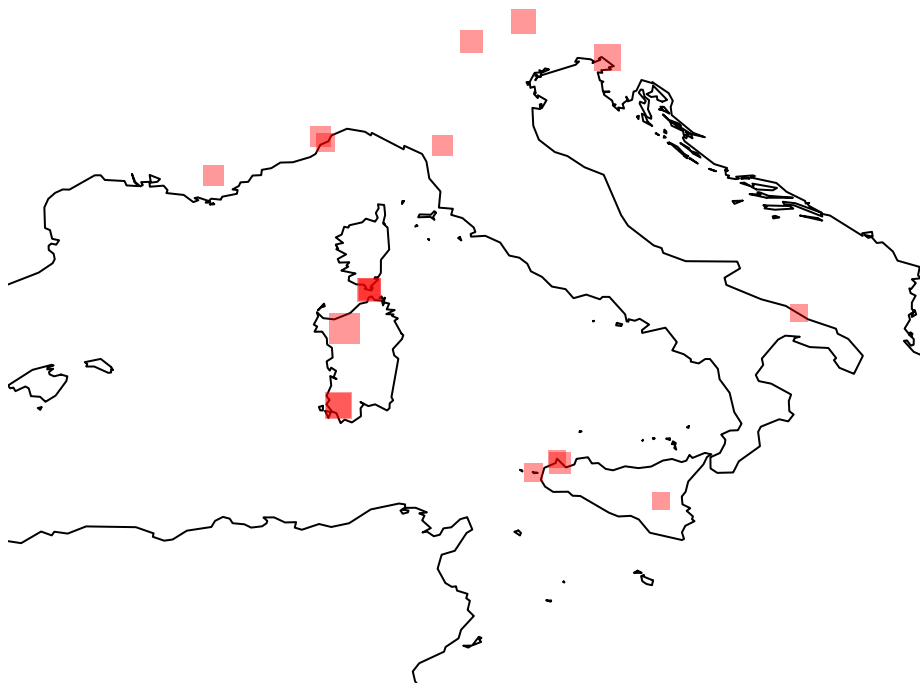

7385 cal. BC

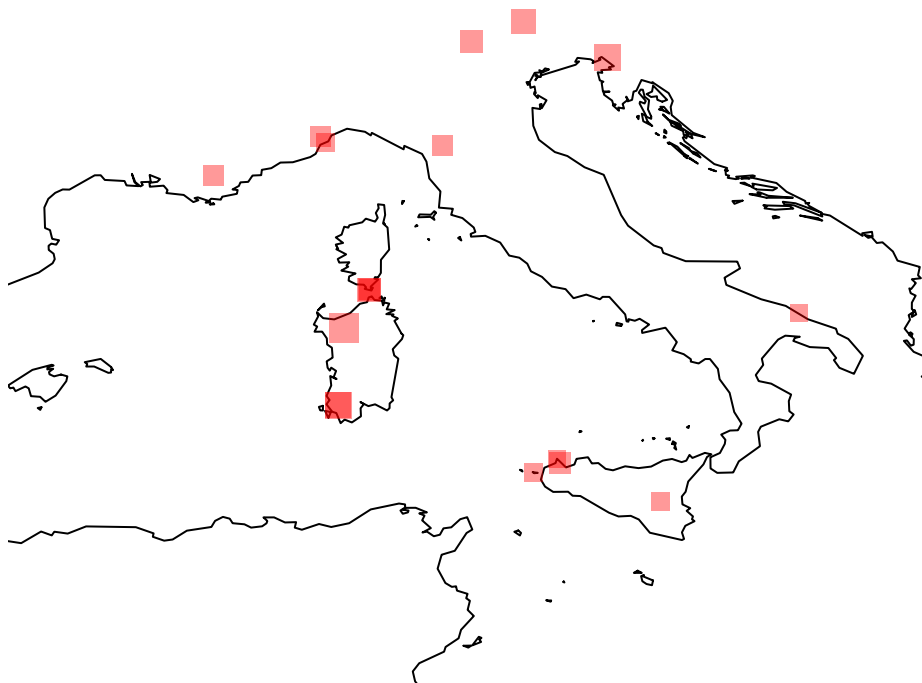

7380 cal. BC

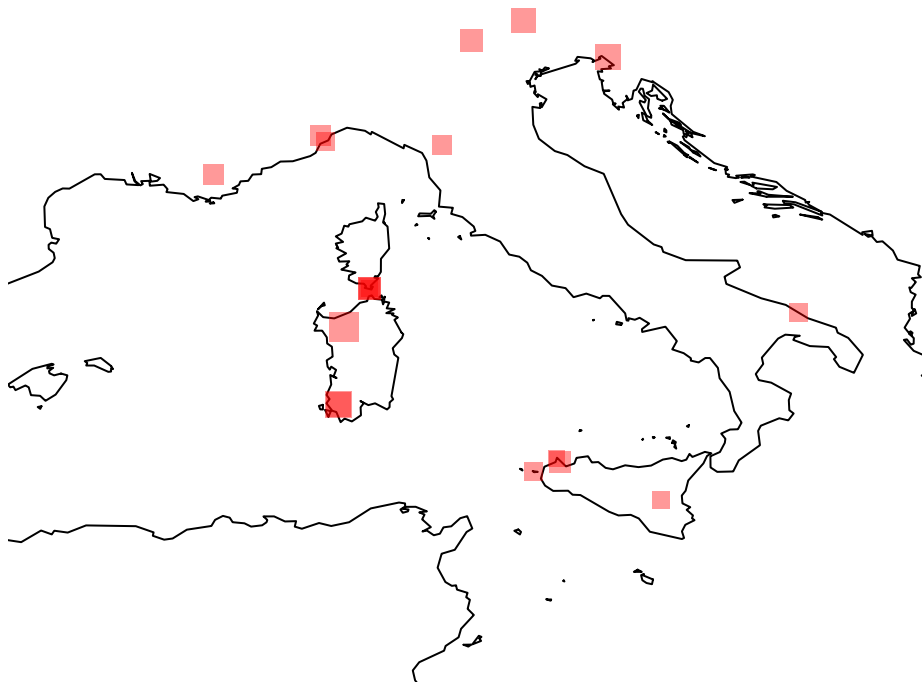

7375 cal. BC

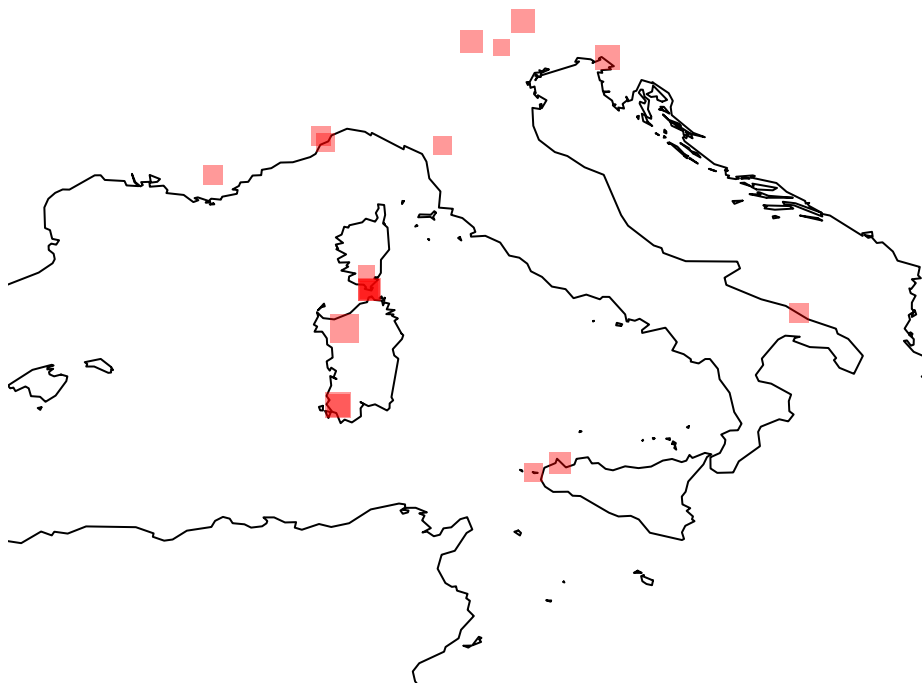

7370 cal. BC

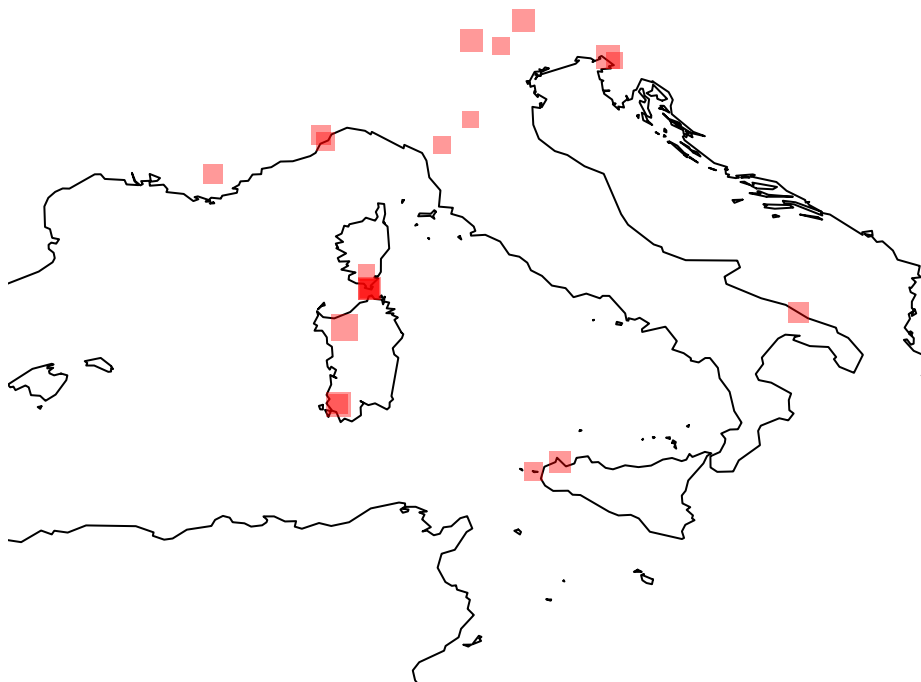



7365 cal. BC

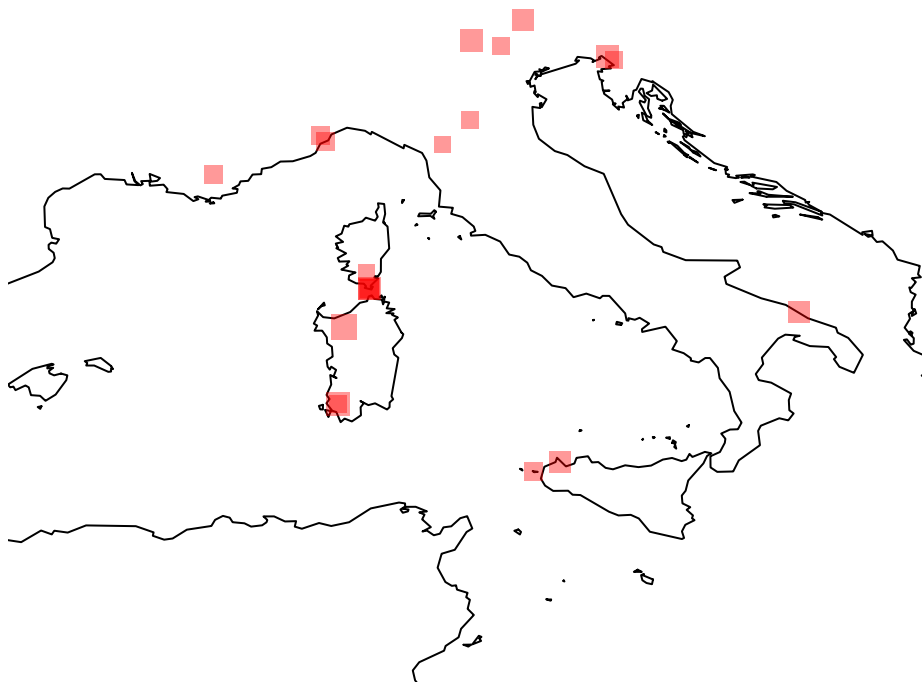

7360 cal. BC

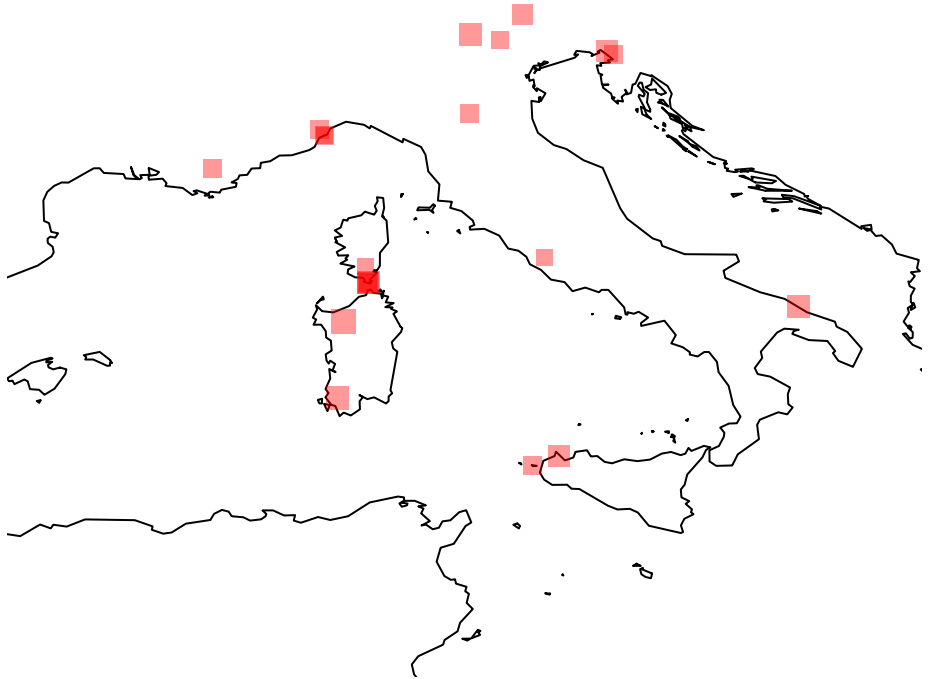

7355 cal. BC

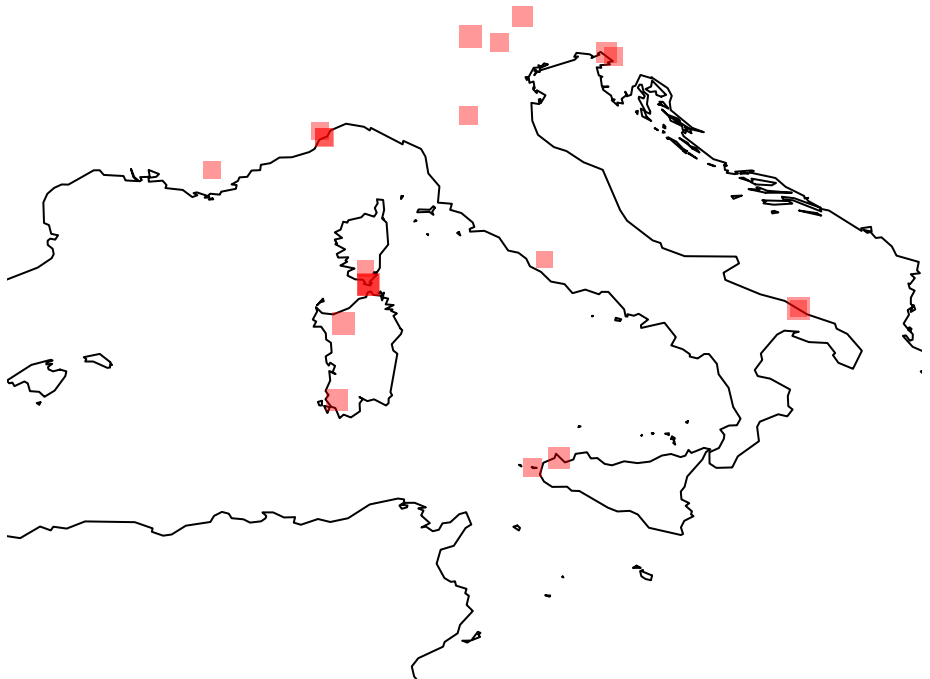

7350 cal. BC

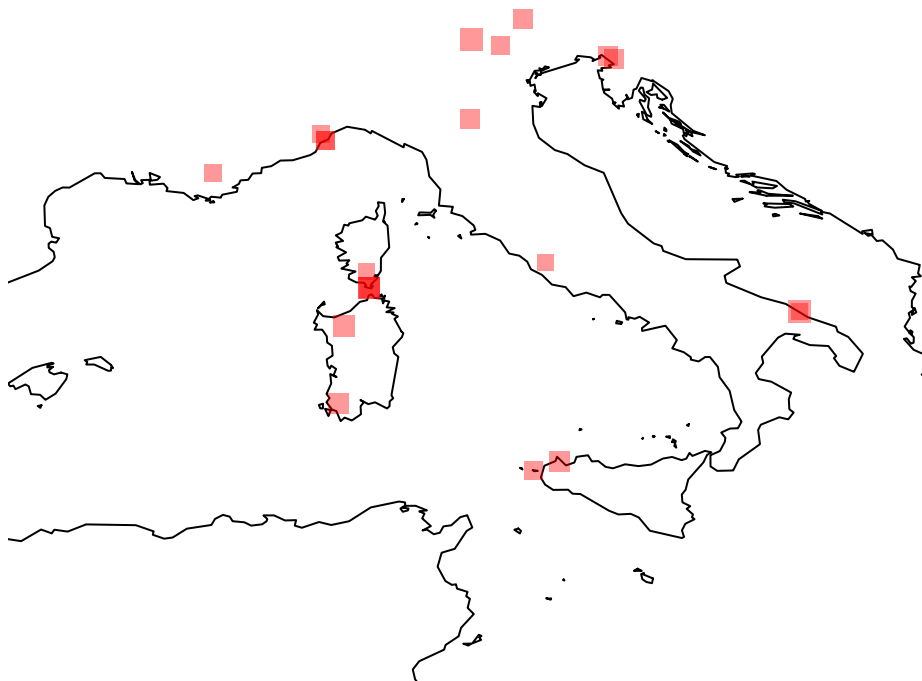

7345 cal. BC

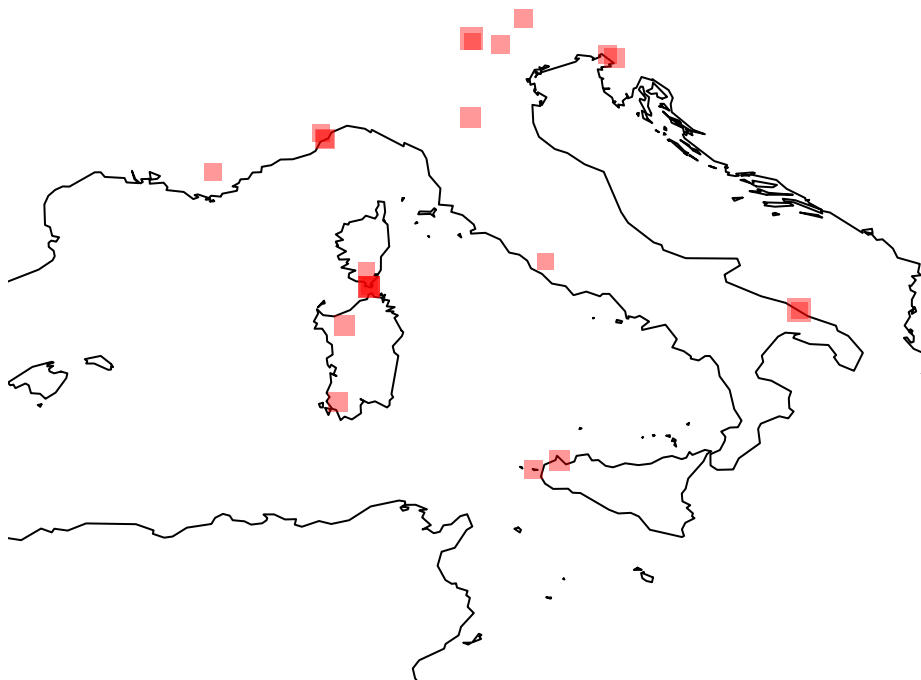

7340 cal. BC

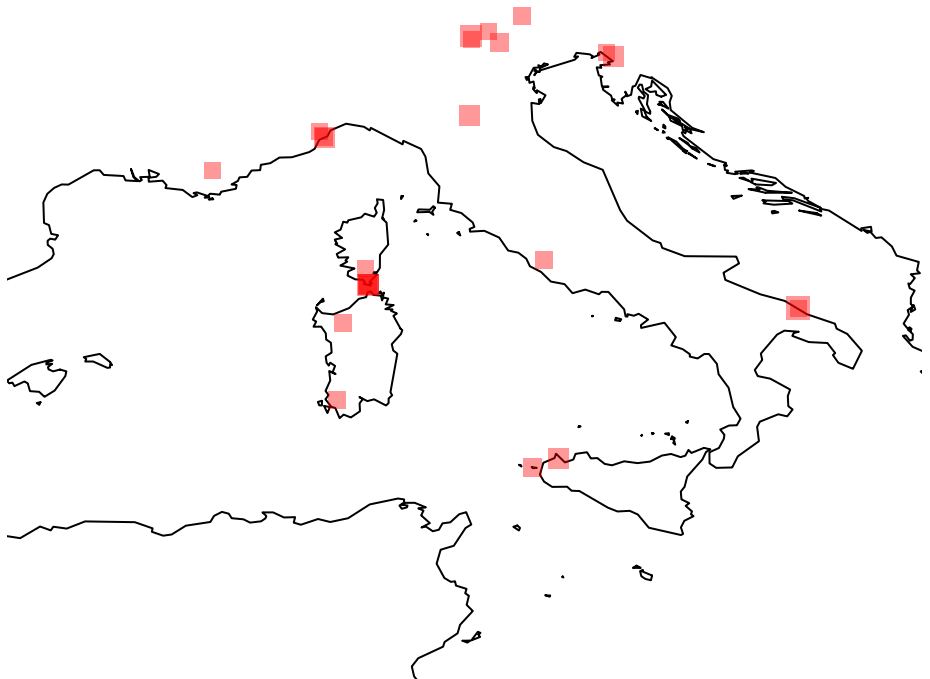

7335 cal. BC

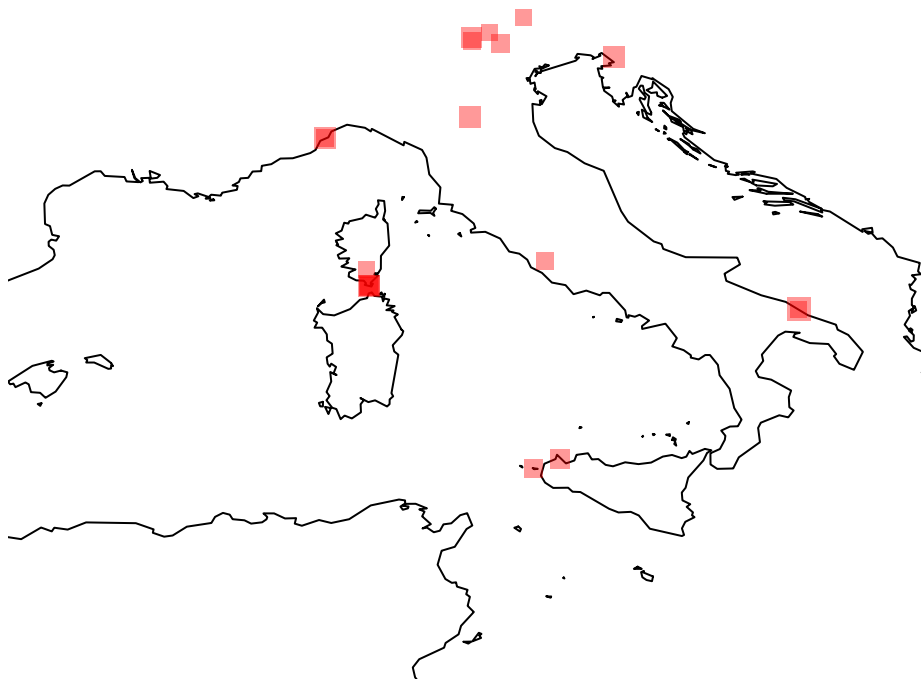

7330 cal. BC

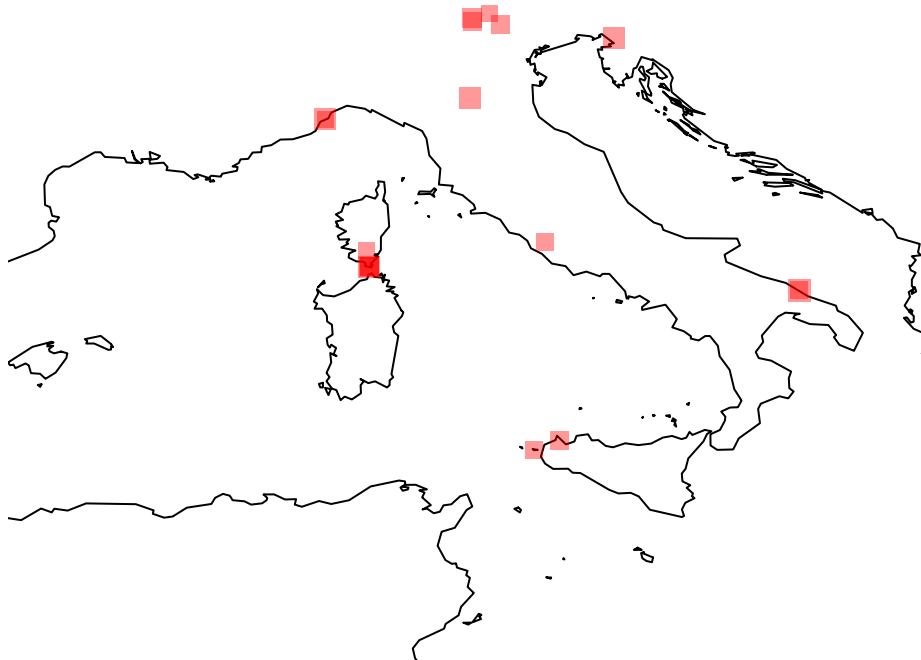



7325 cal. BC

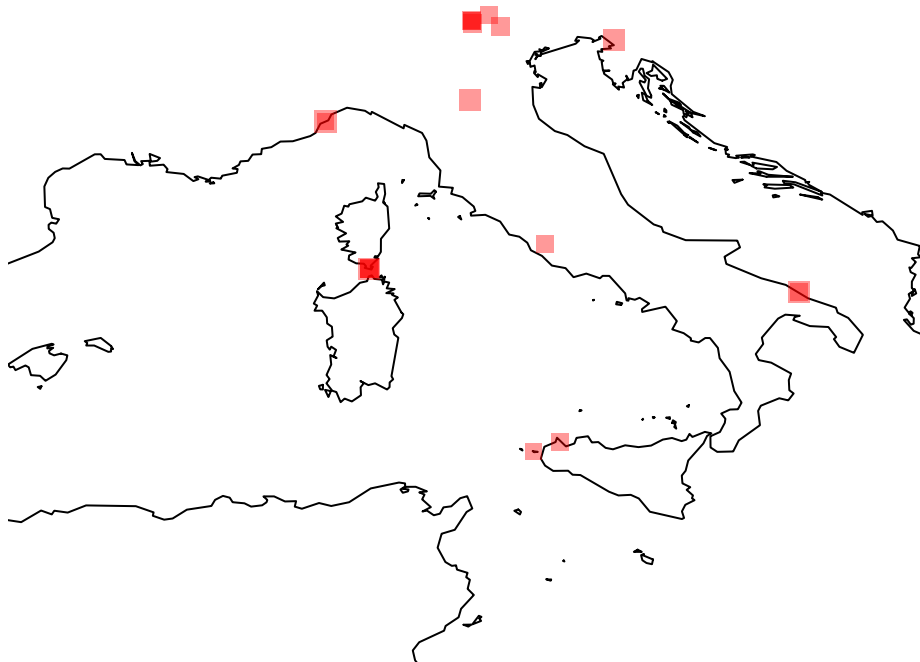

**7320 cal. BC**

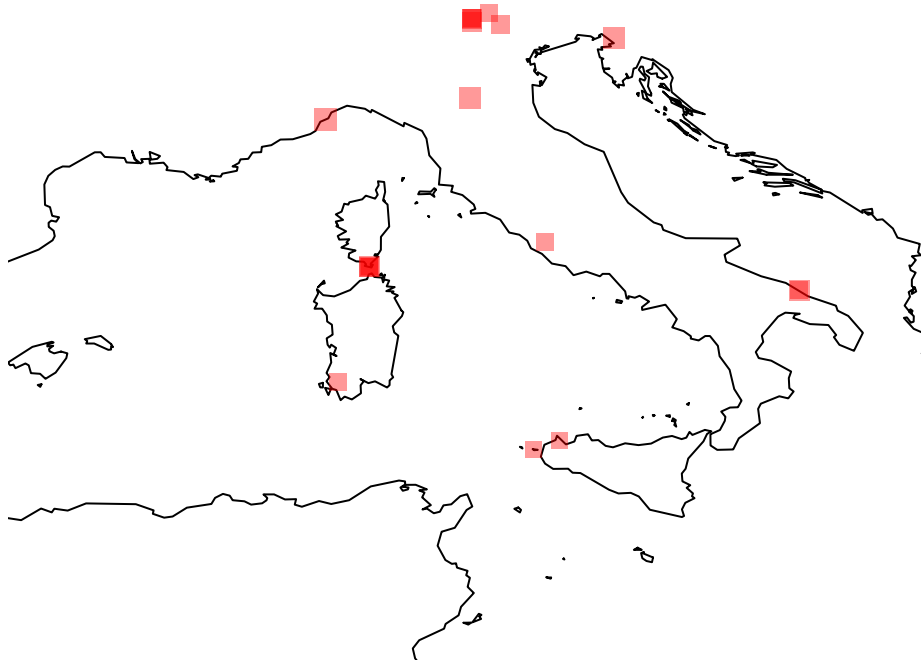

7315 cal. BC

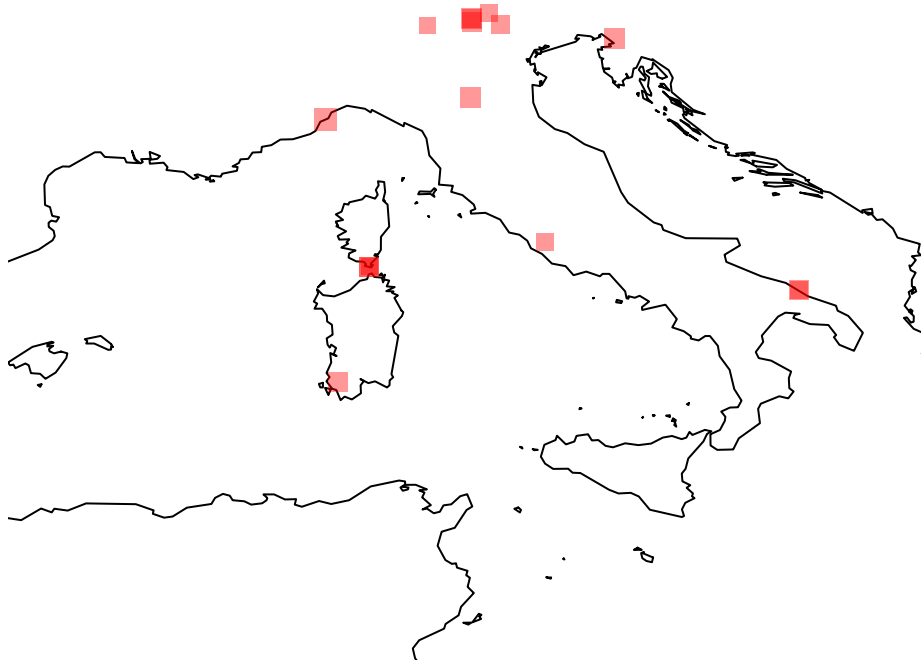

7310 cal. BC

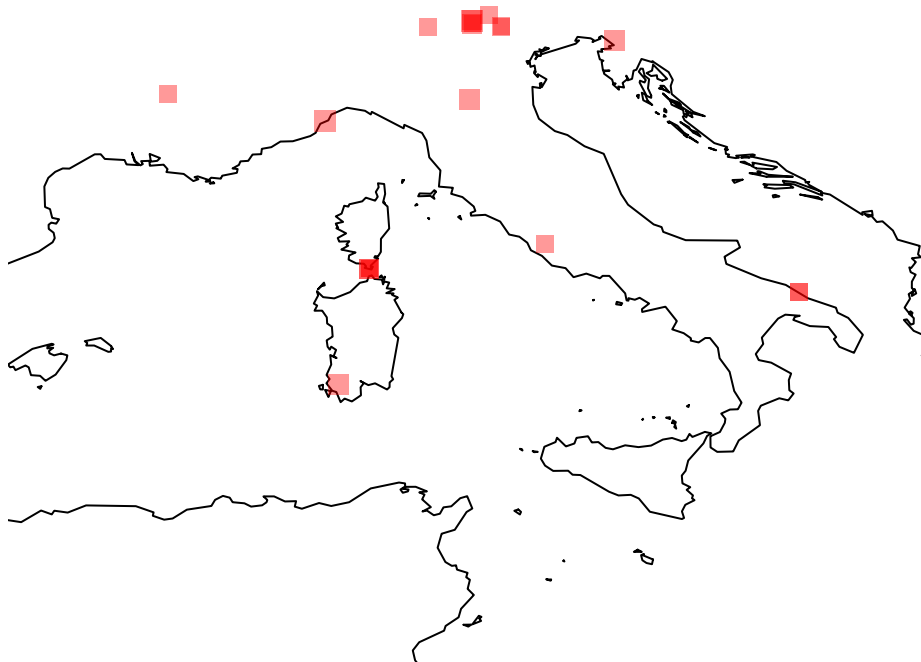

7305 cal. BC

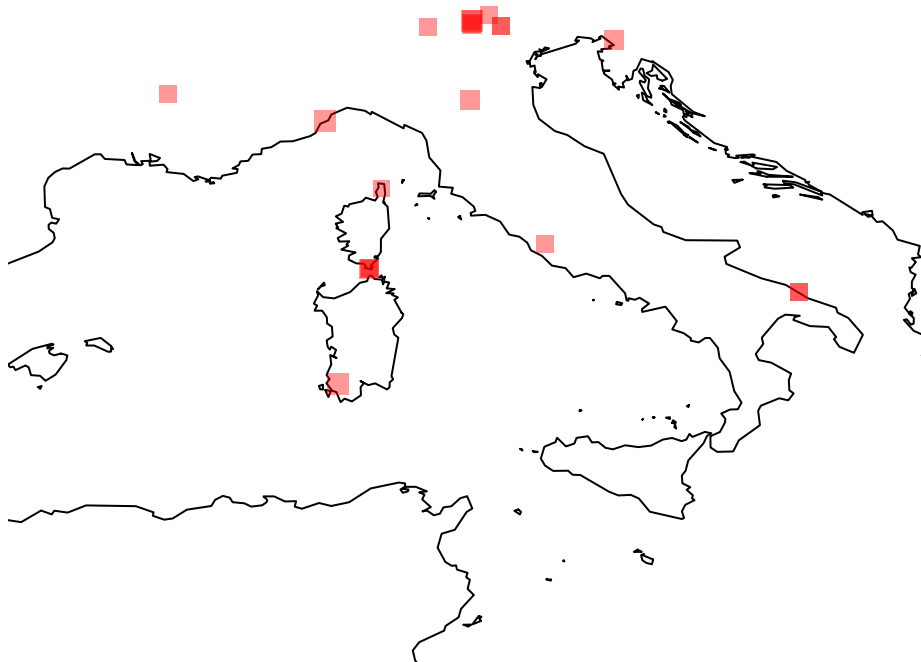

7300 cal. BC

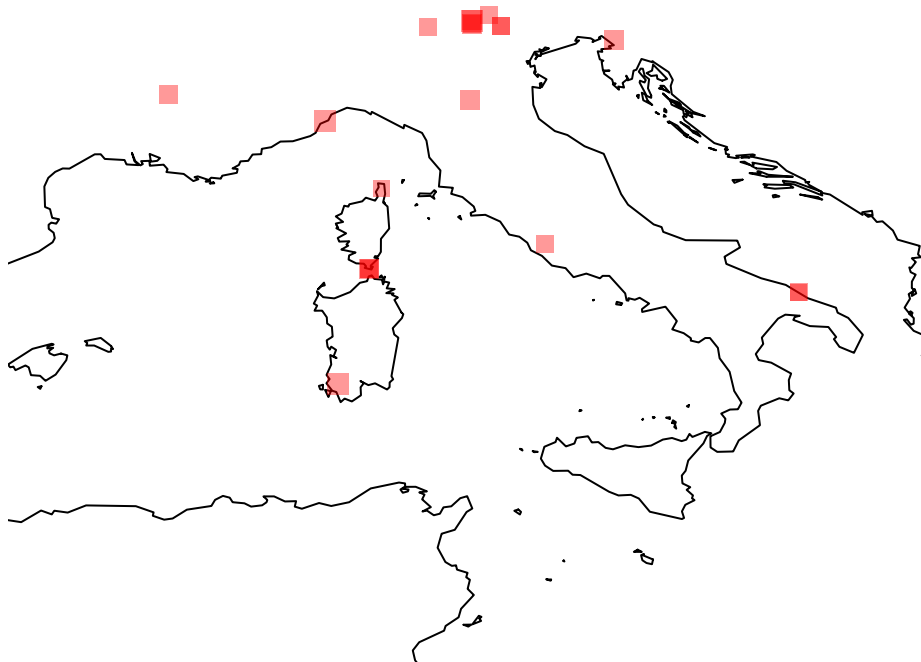

7295 cal. BC

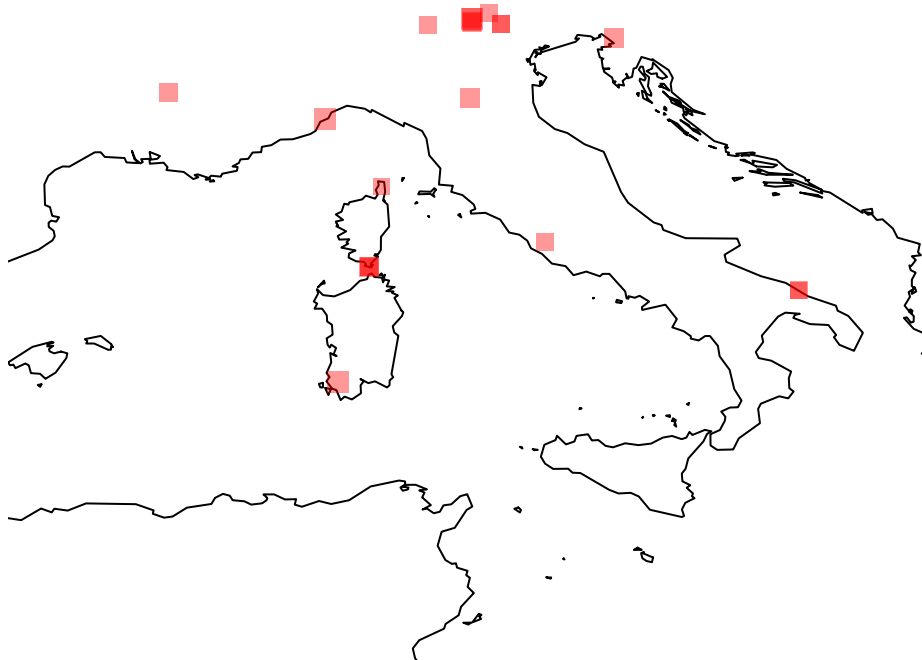

7290 cal. BC

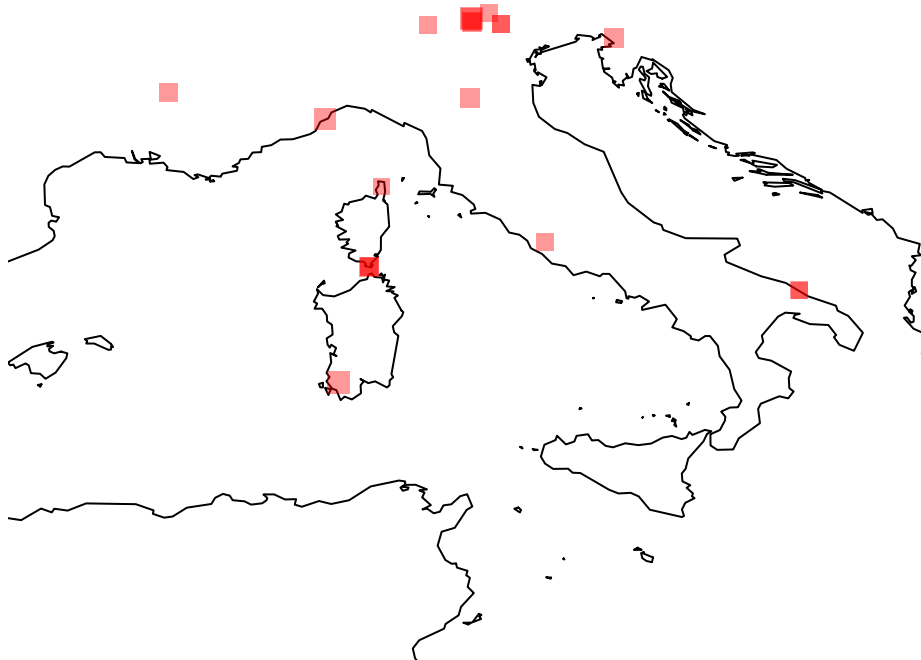



7285 cal. BC

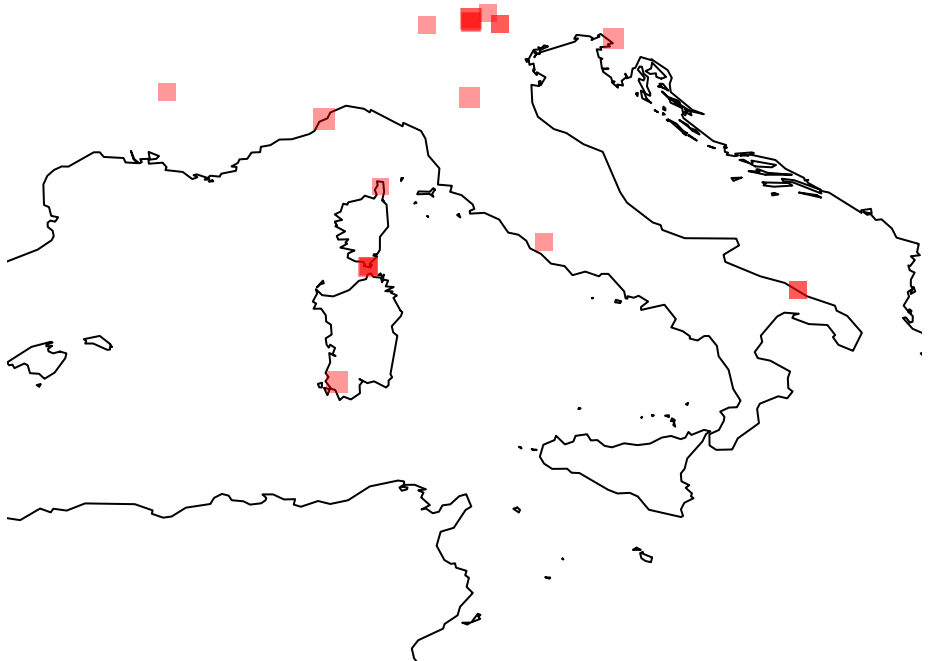

7280 cal. BC

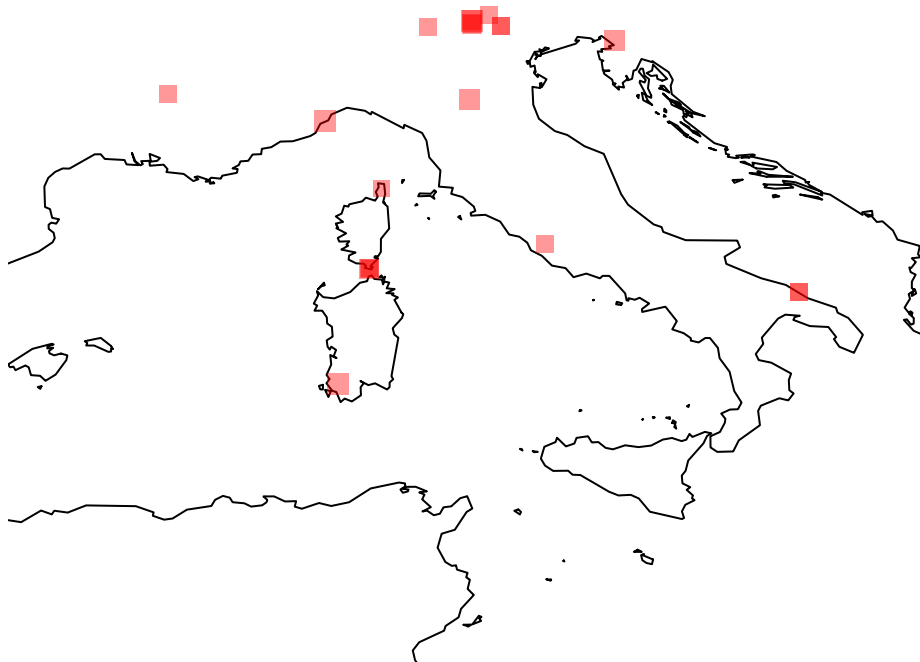

7275 cal. BC

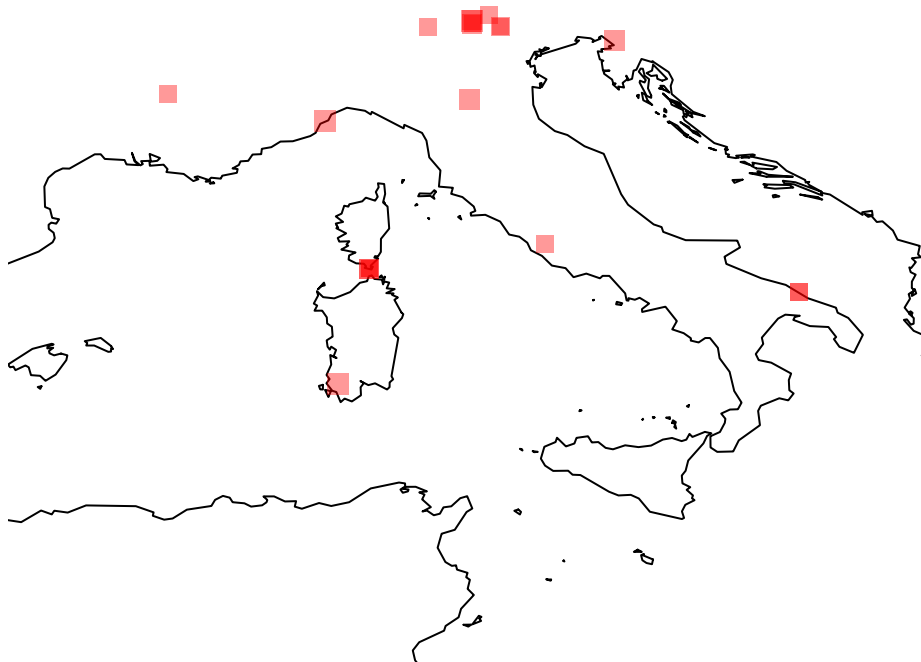

7270 cal. BC

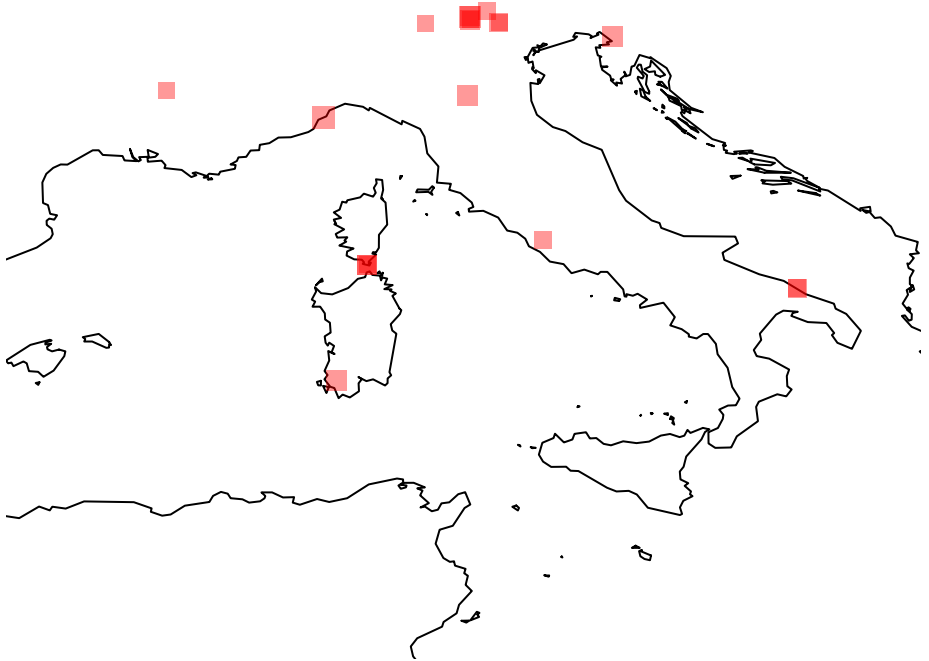

7265 cal. BC

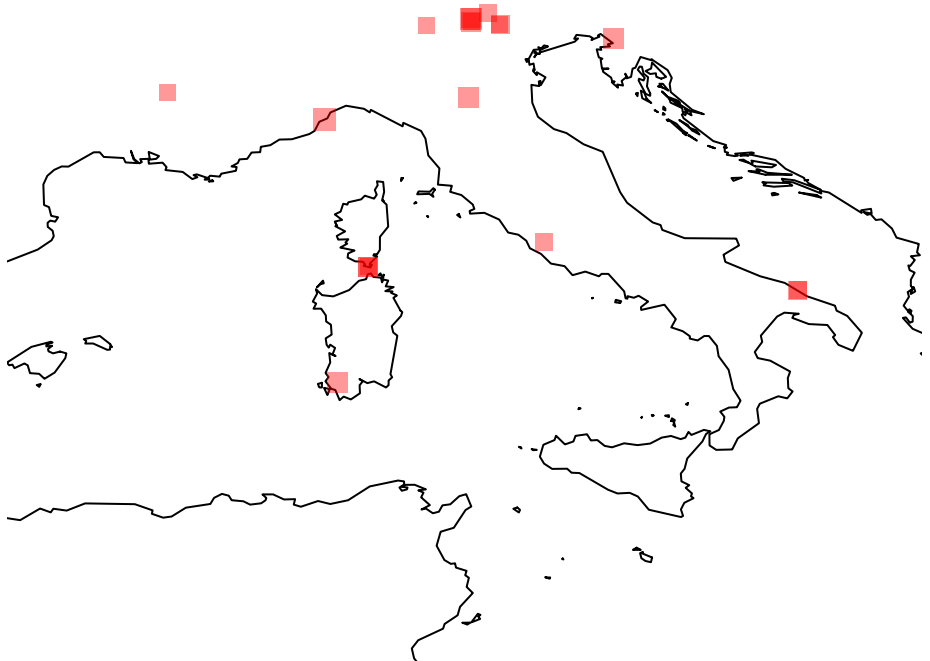

7260 cal. BC

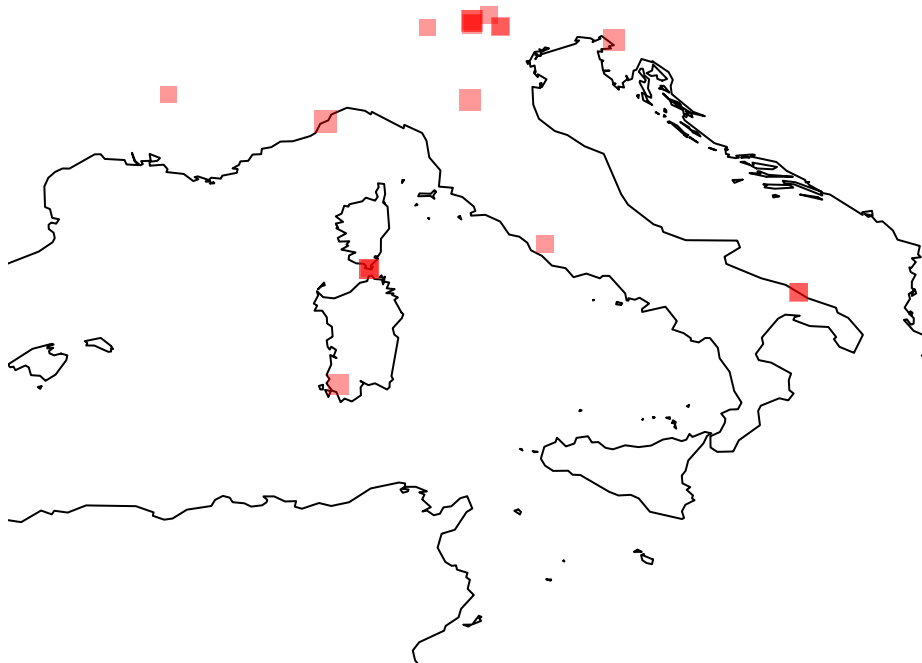

7255 cal. BC

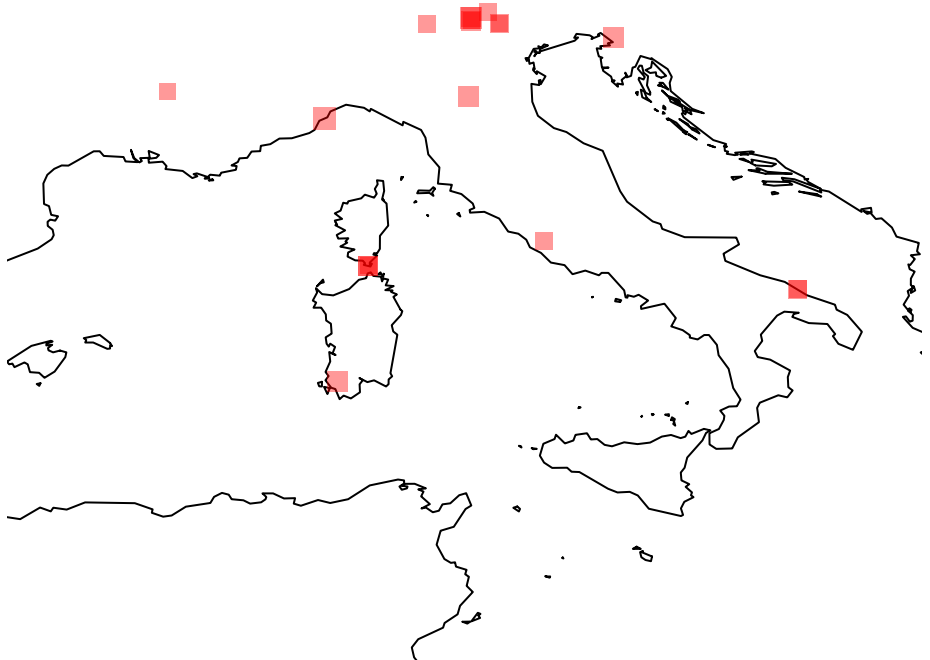

7250 cal. BC

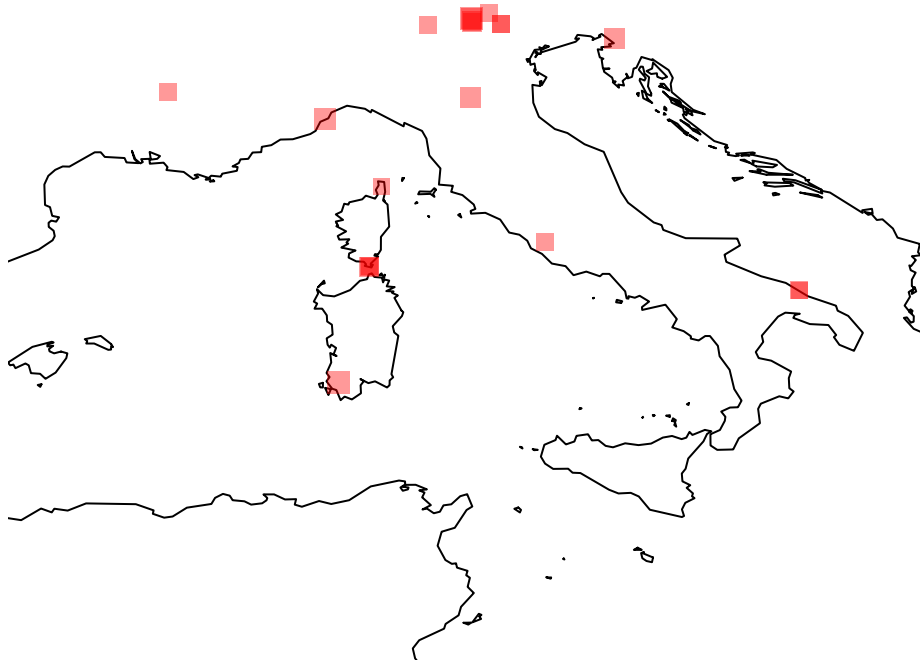



7245 cal. BC

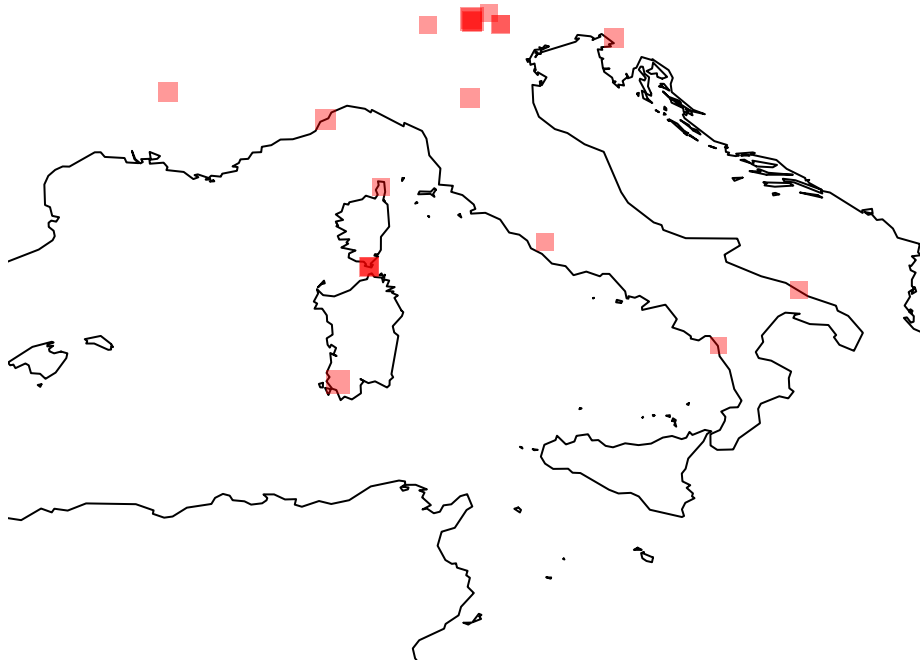

7240 cal. BC

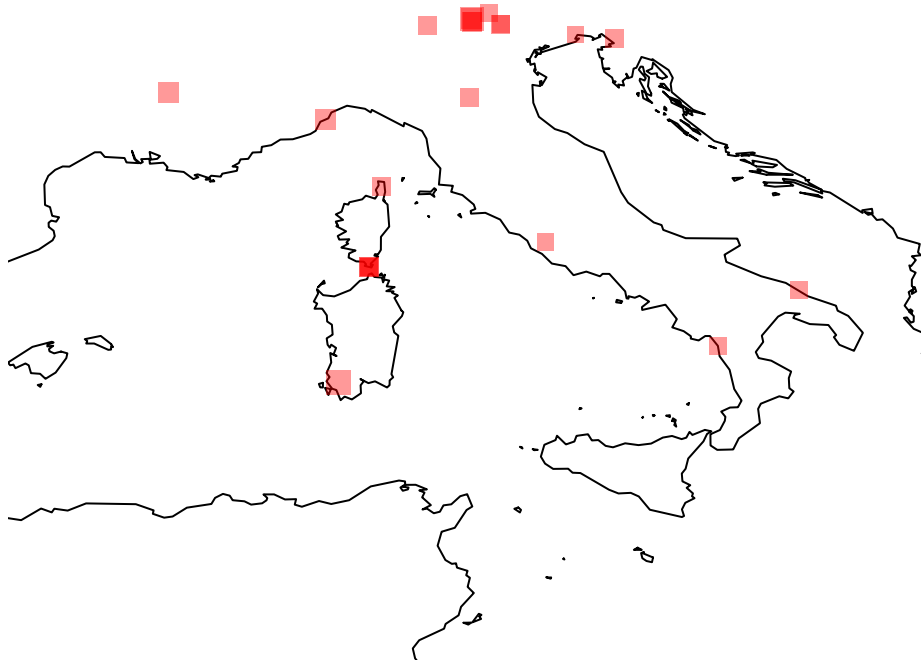

7235 cal. BC

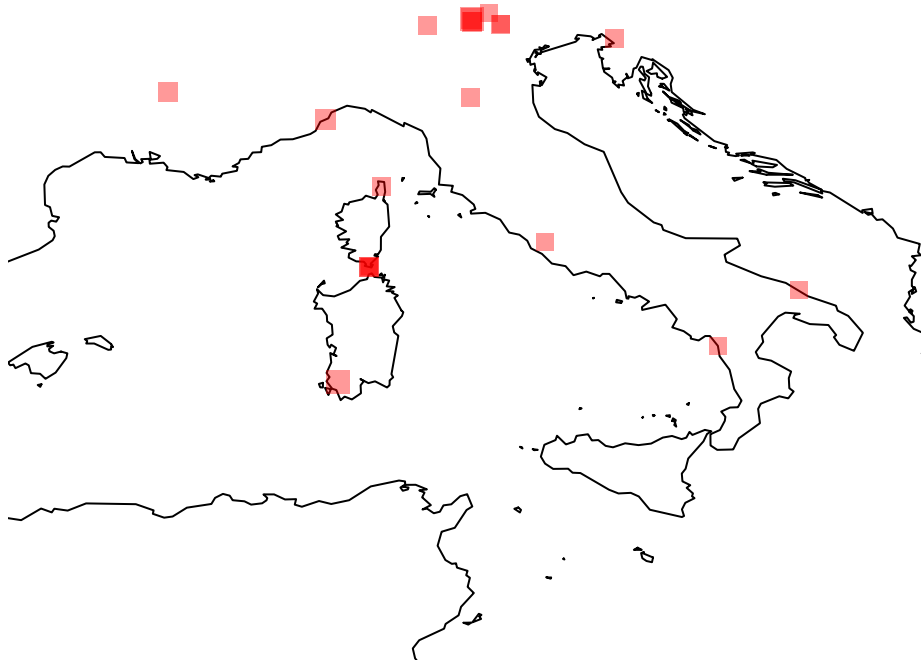

**7230 cal. BC**

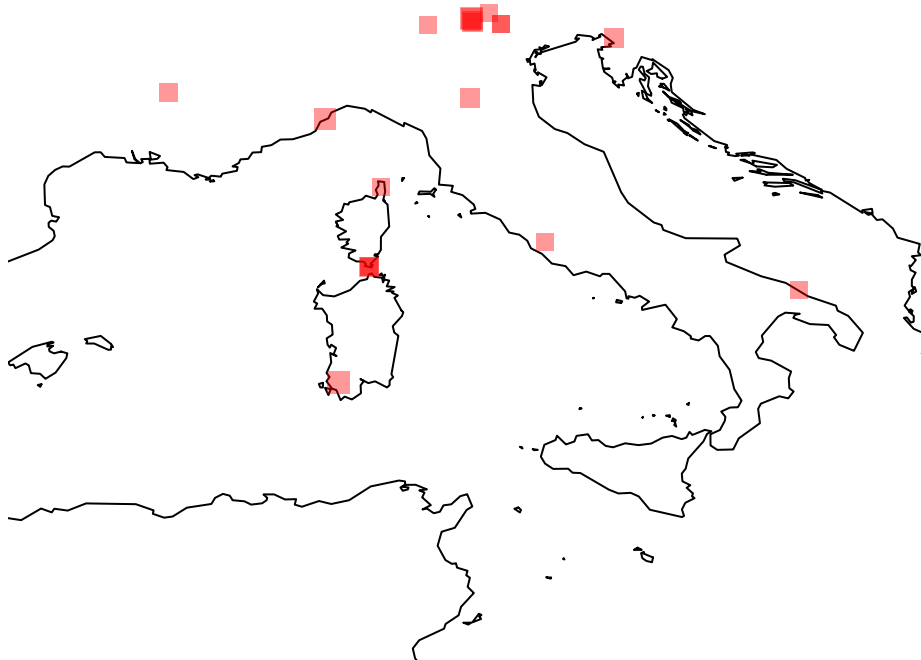

7225 cal. BC

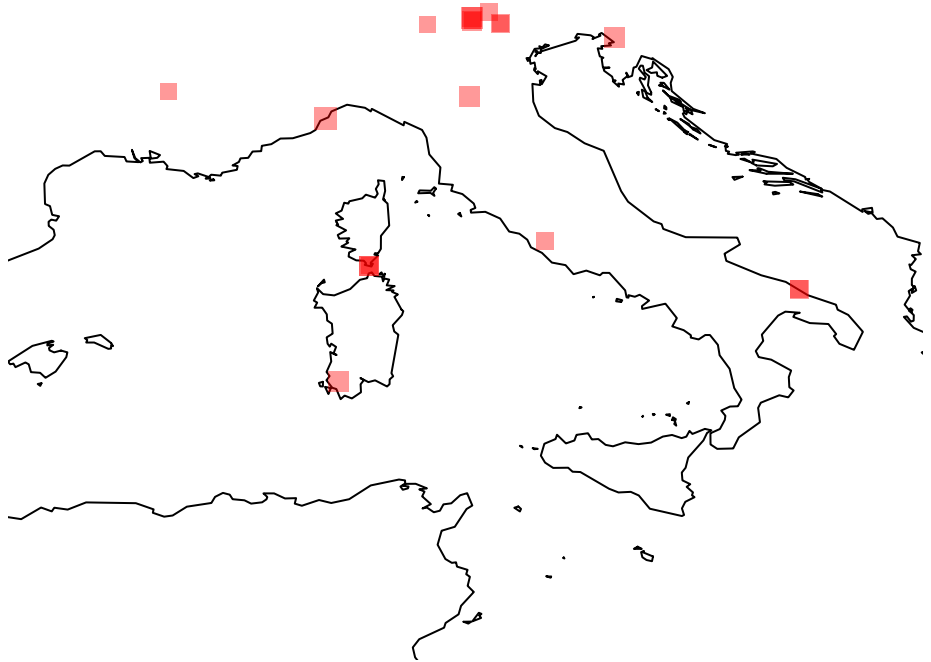

**7220 cal. BC**



7215 cal. BC

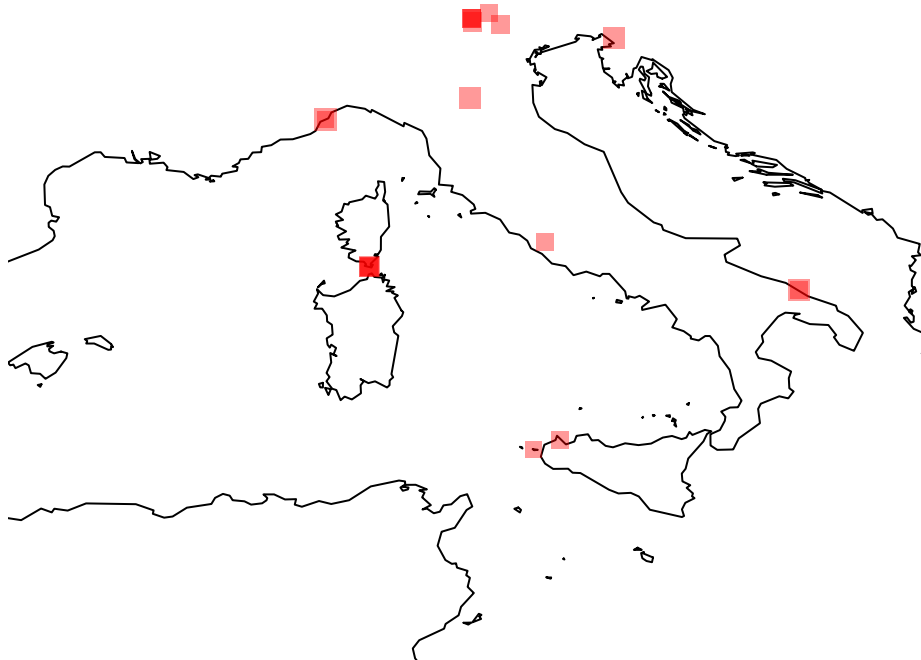

7210 cal. BC

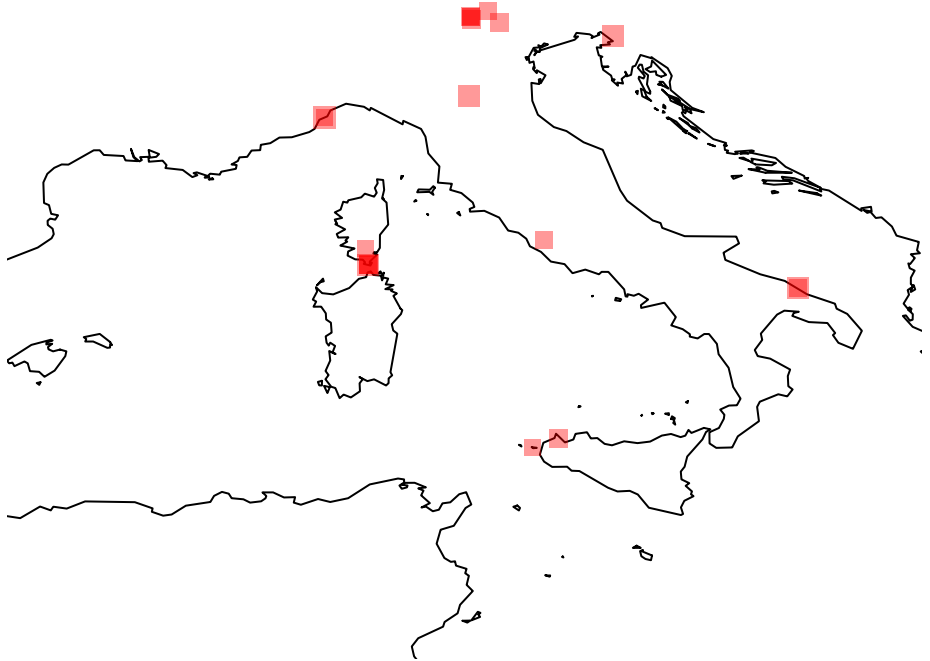



7205 cal. BC

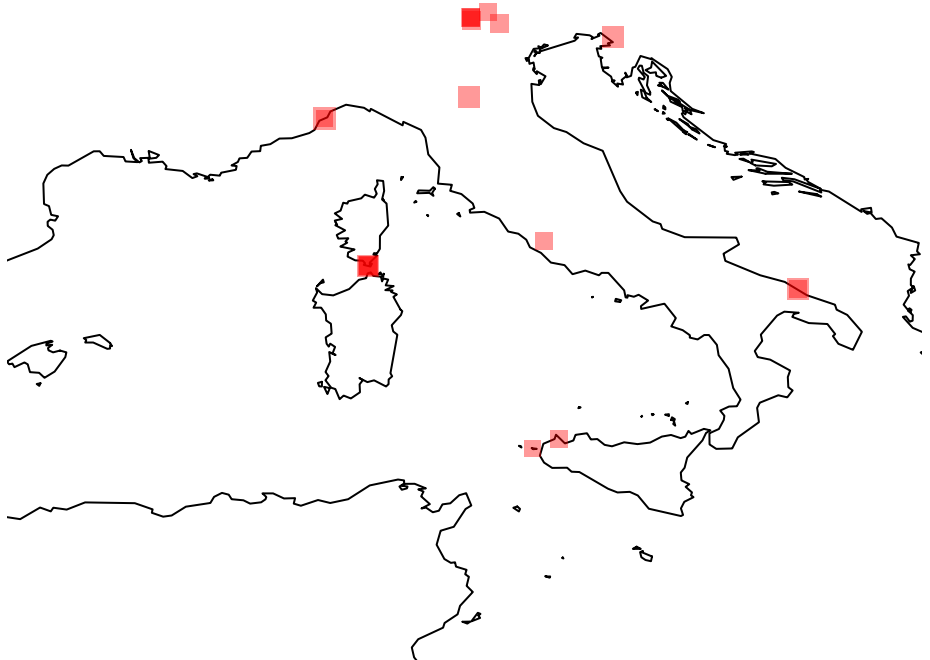

**7200 cal. BC**

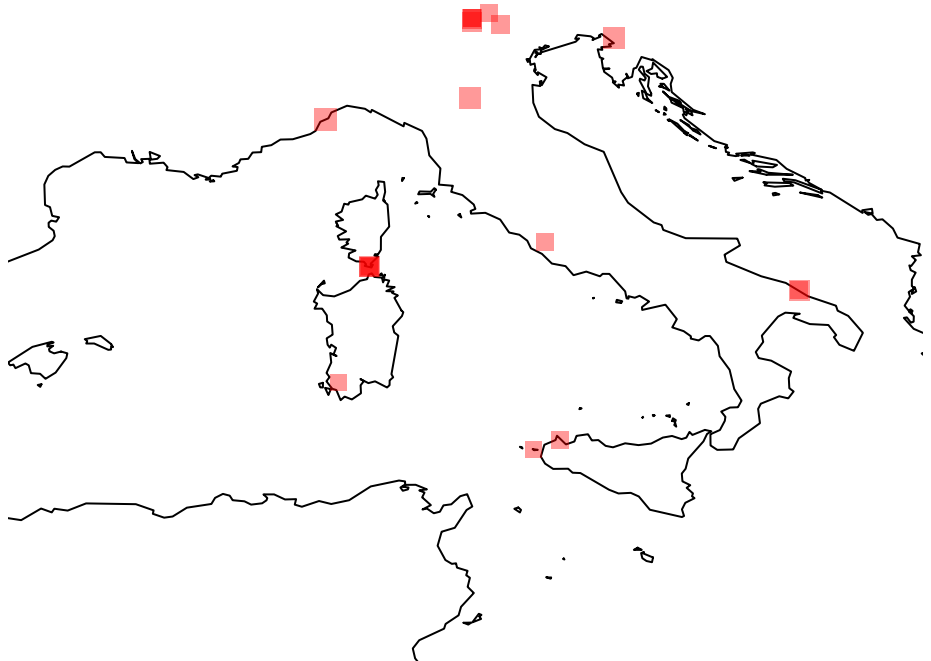

7195 cal. BC

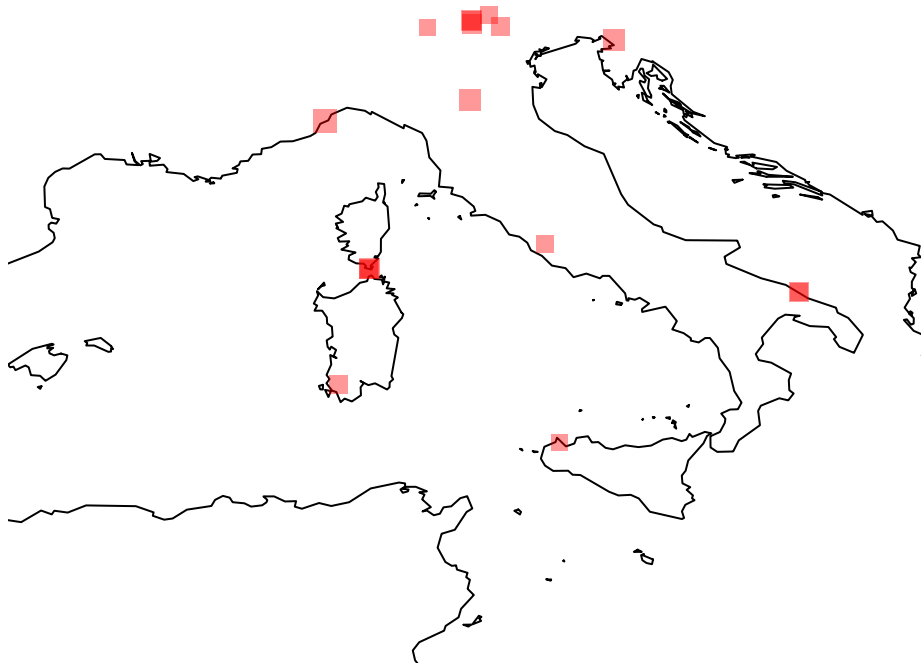

7190 cal. BC

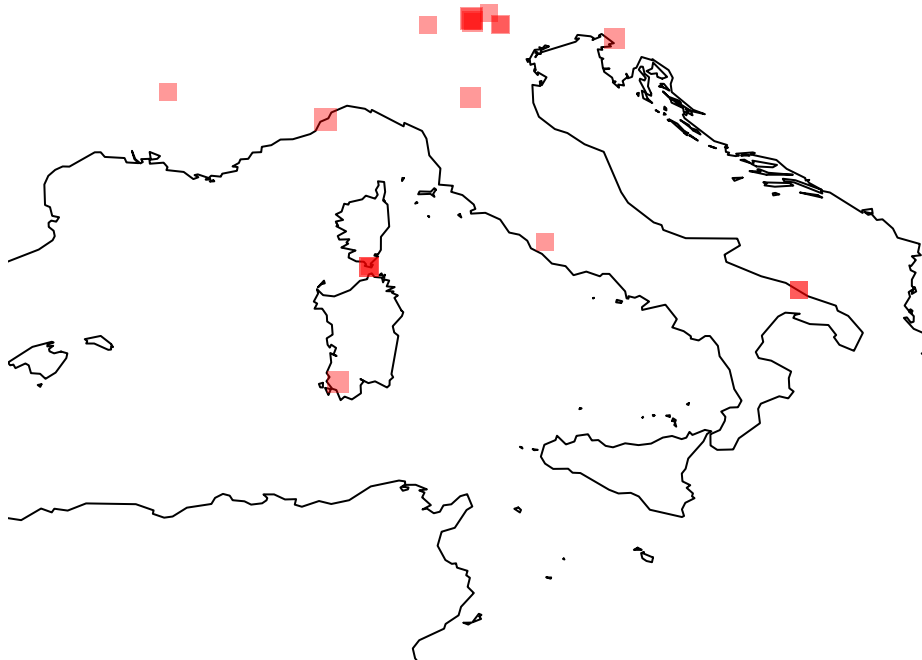

7185 cal. BC

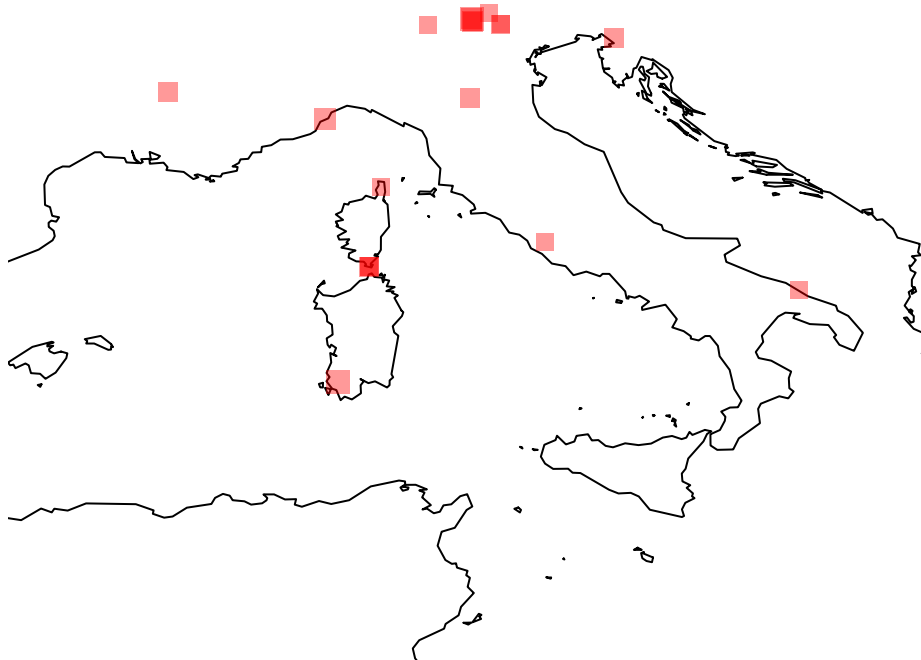

7180 cal. BC

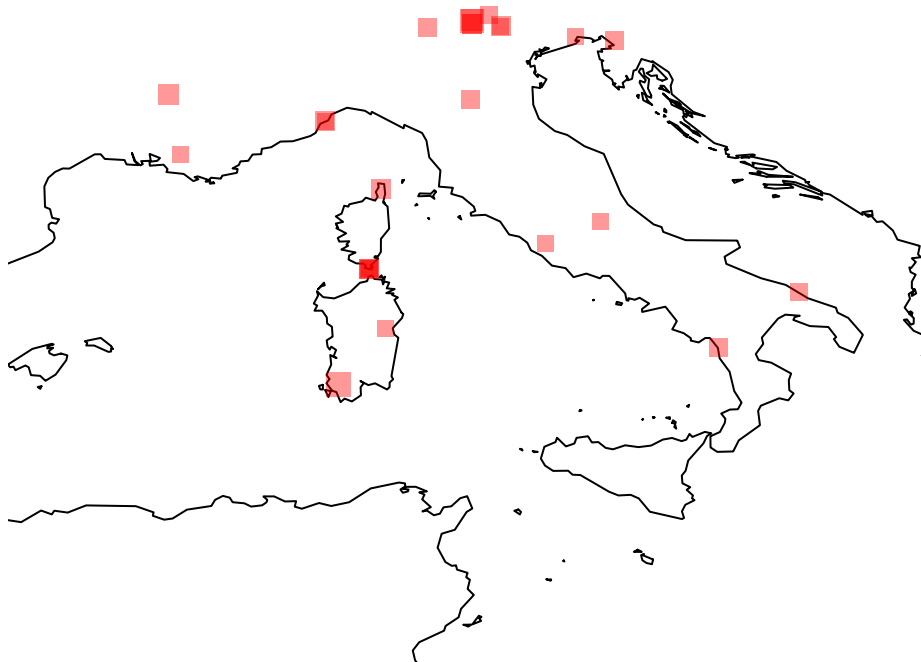



7170 cal. BC

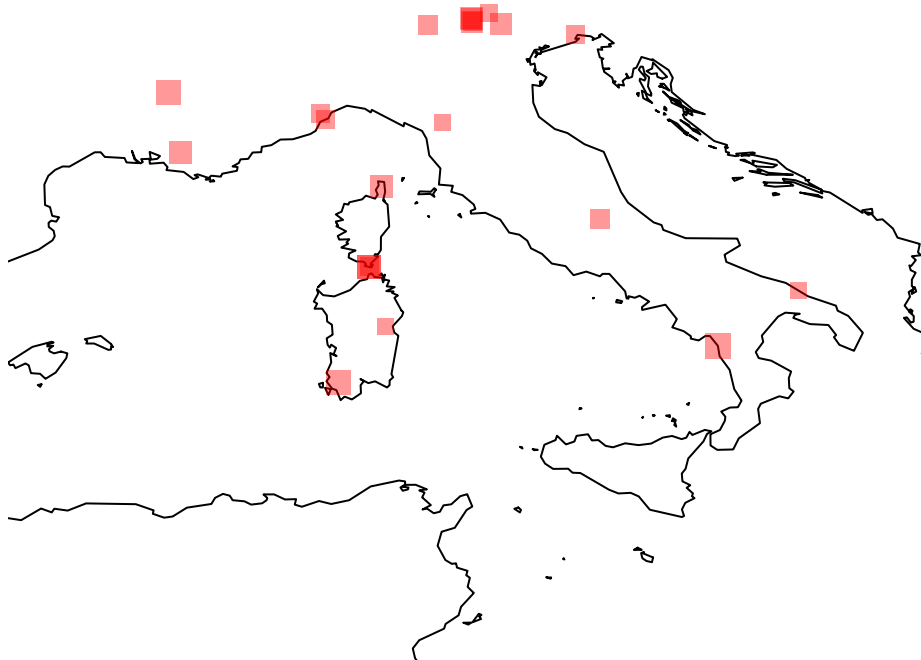



7165 cal. BC

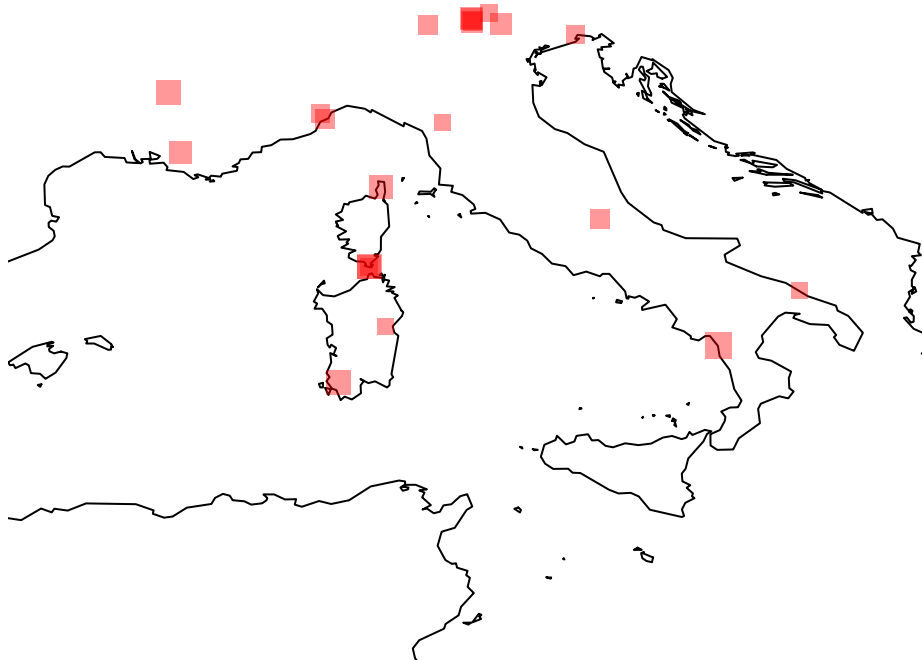

7160 cal. BC

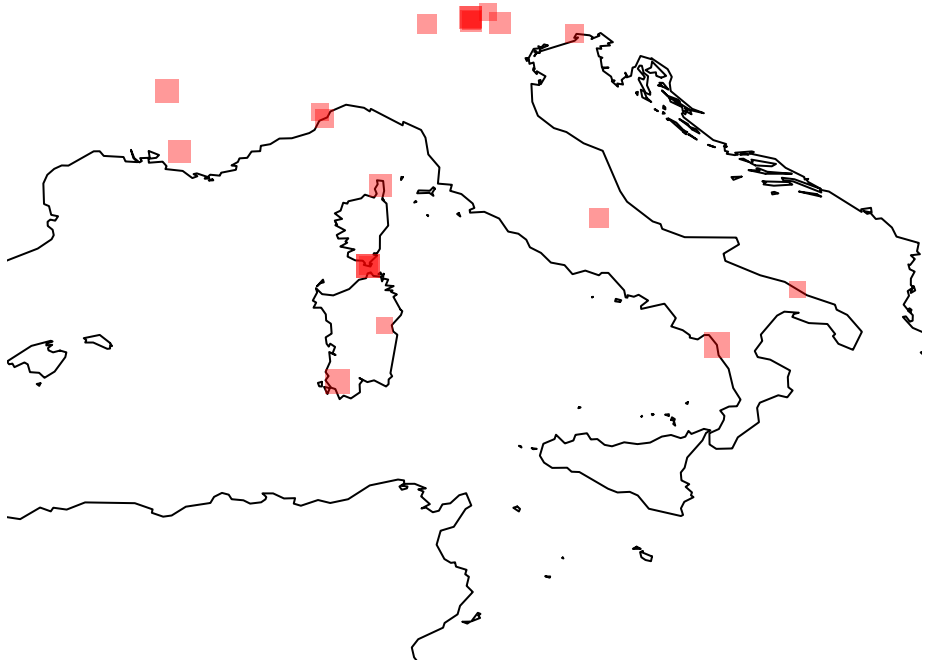

7155 cal. BC

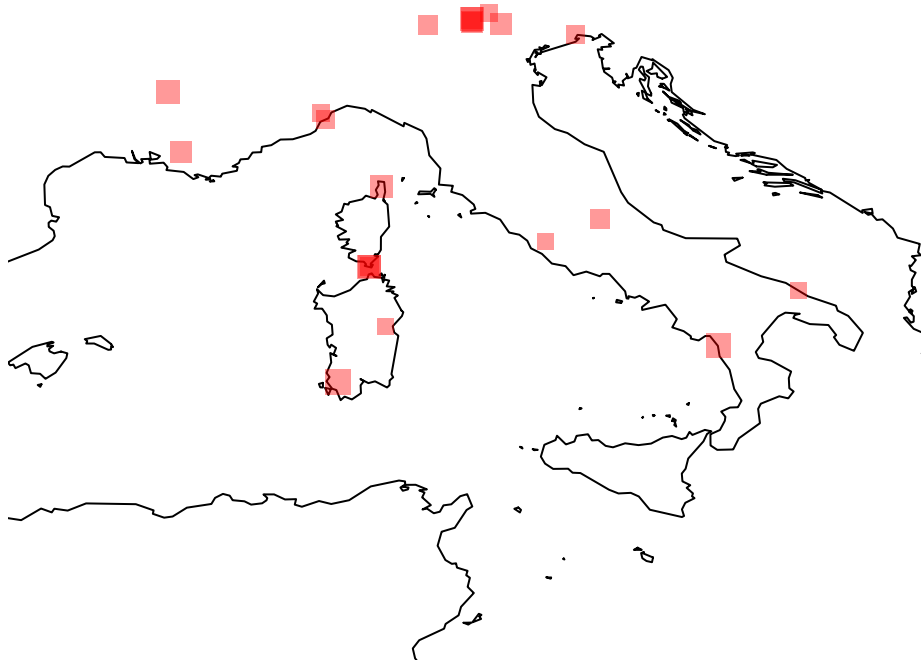



7145 cal. BC

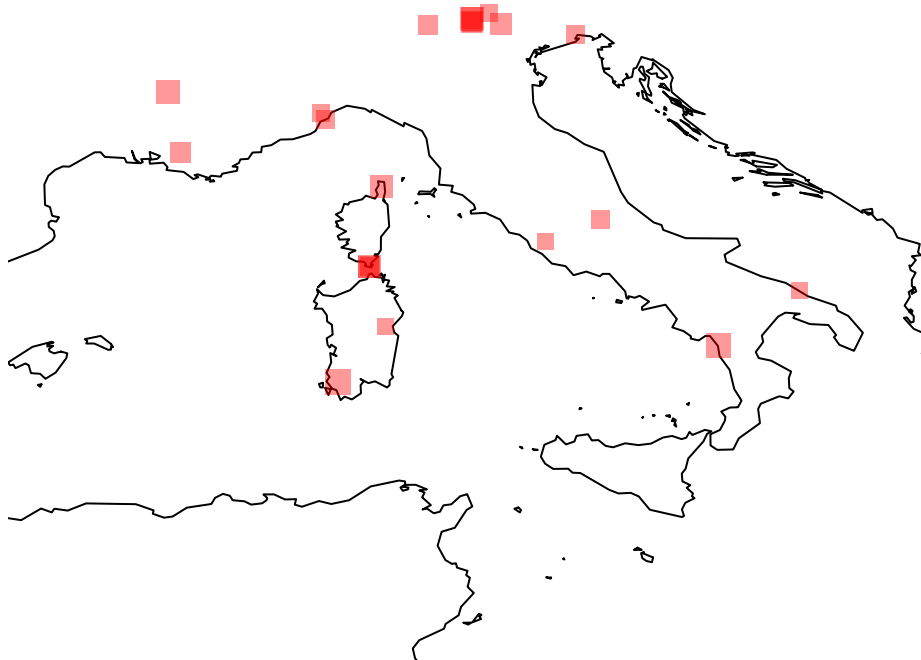

7140 cal. BC

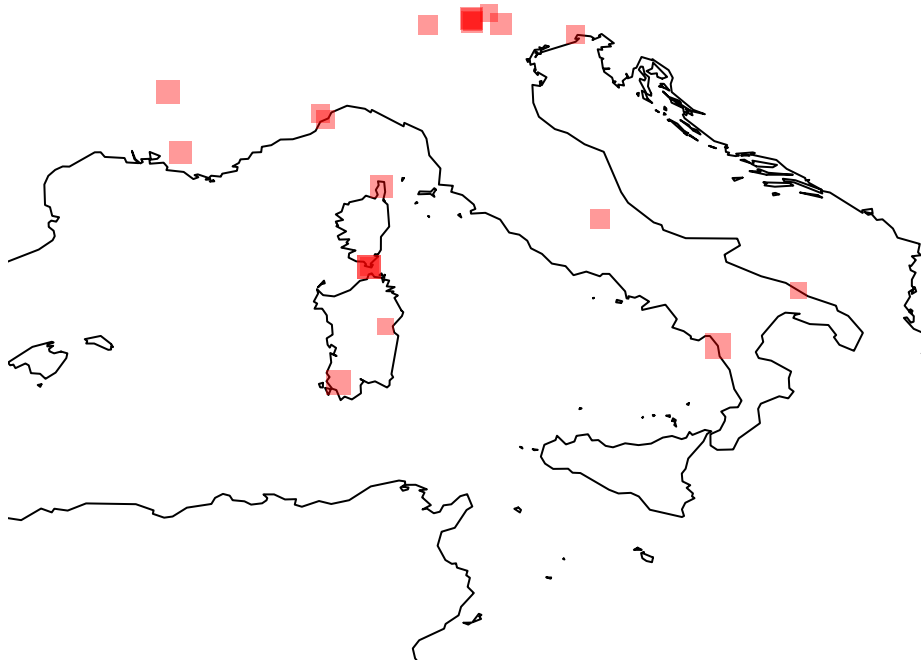

7135 cal. BC

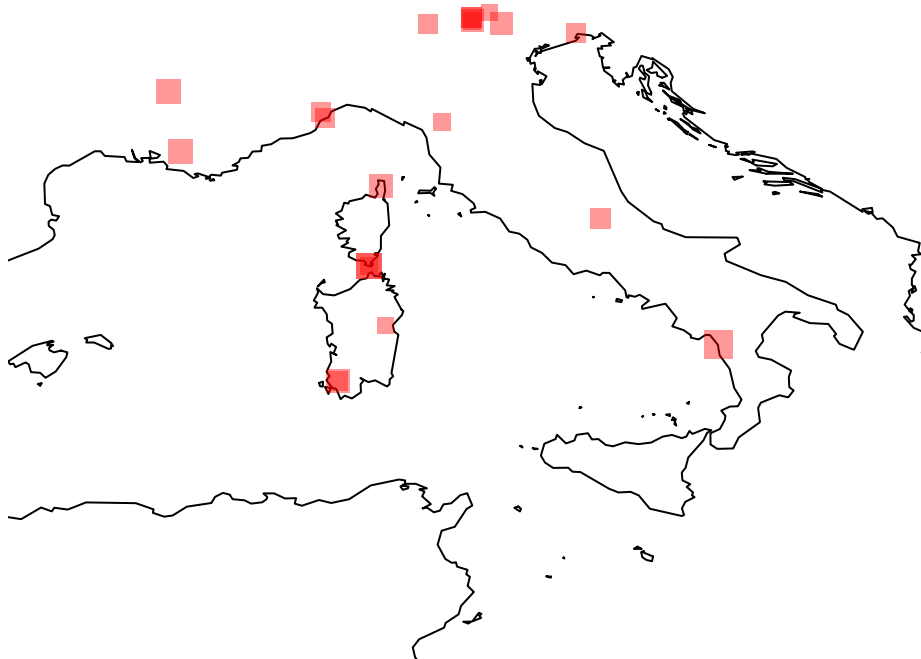

7130 cal. BC

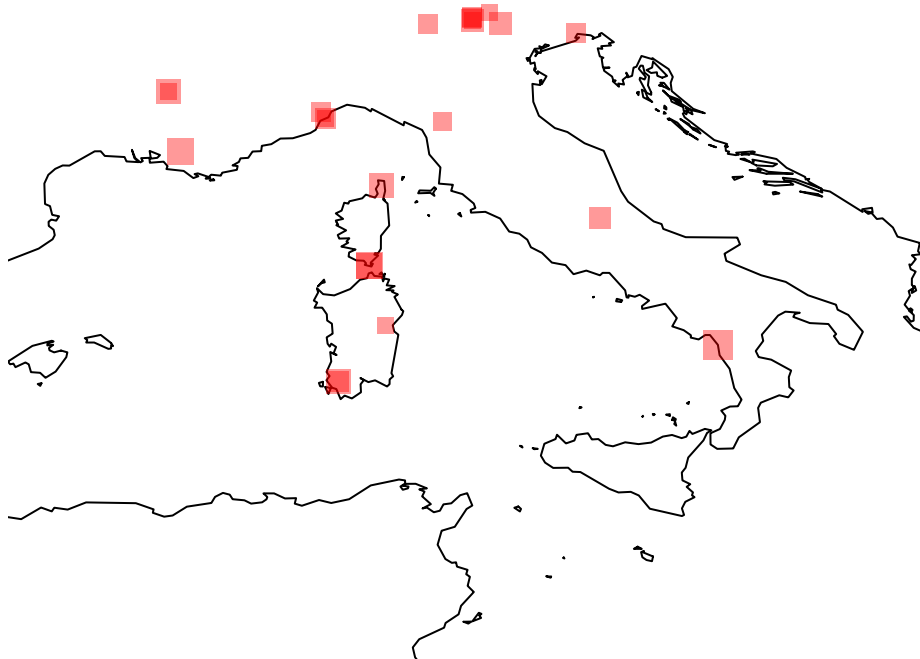



7125 cal. BC

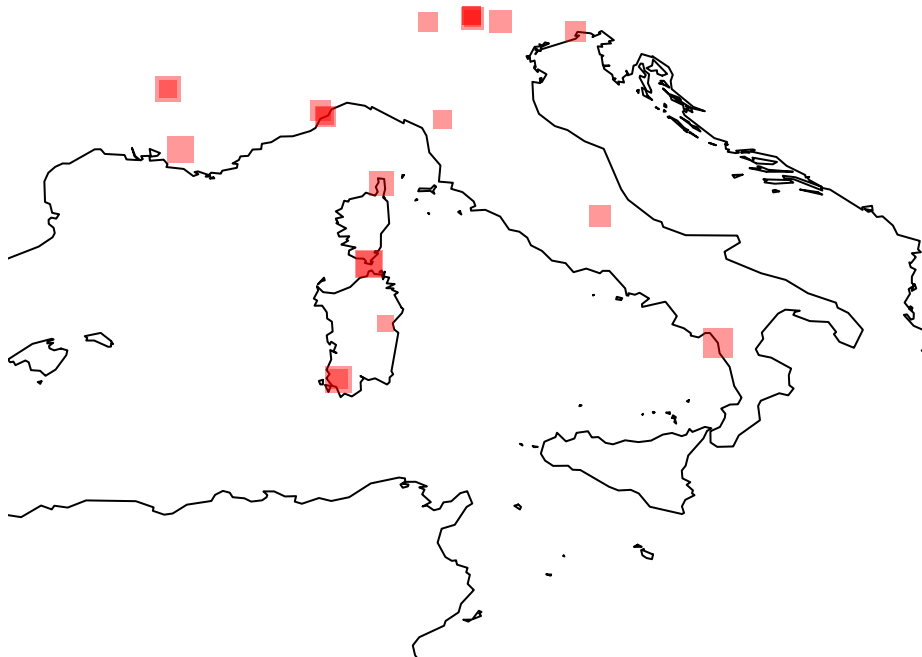

7120 cal. BC



7115 cal. BC

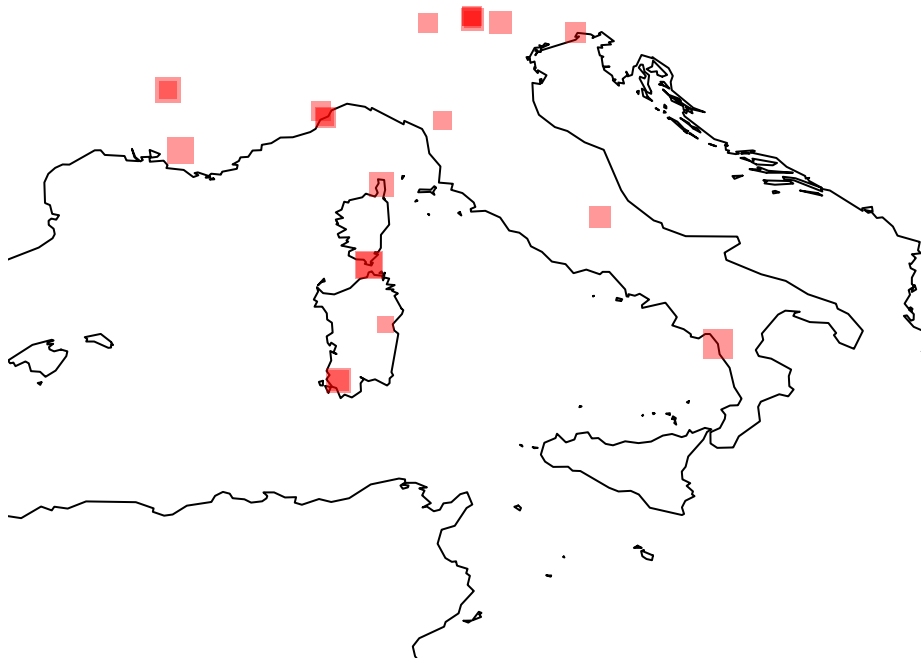

7110 cal. BC

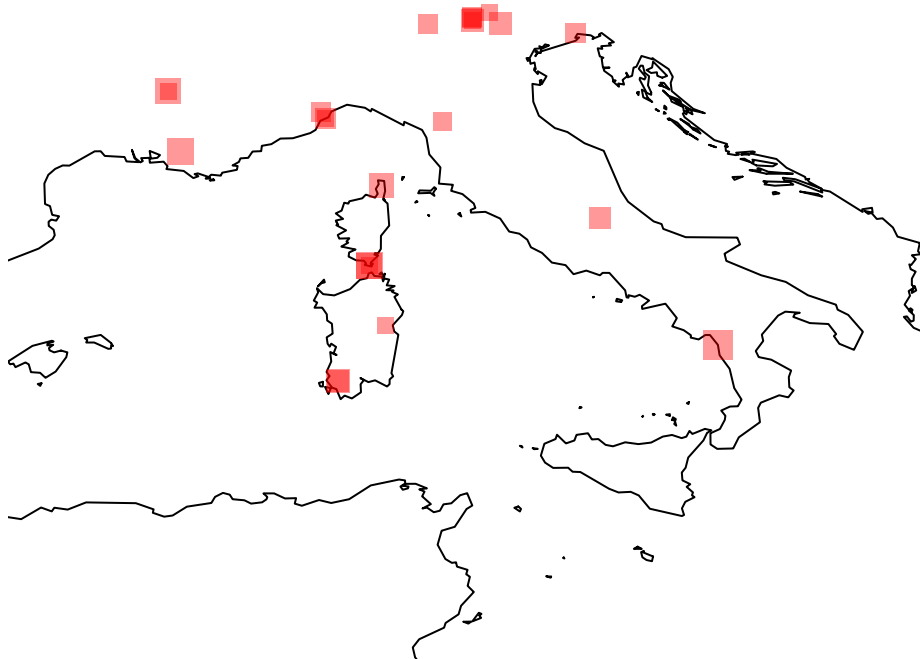

7105 cal. BC

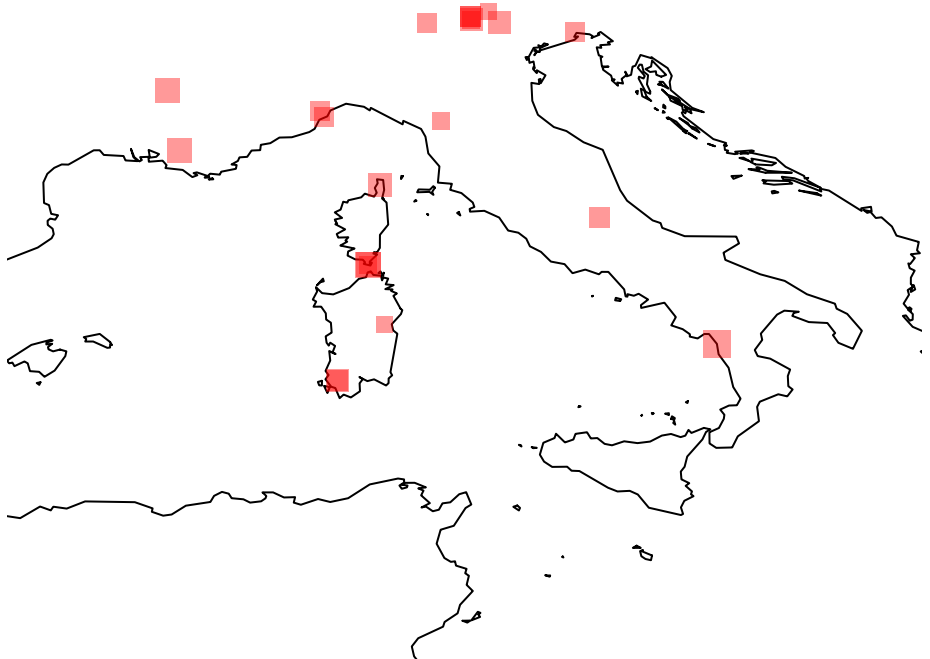

7100 cal. BC

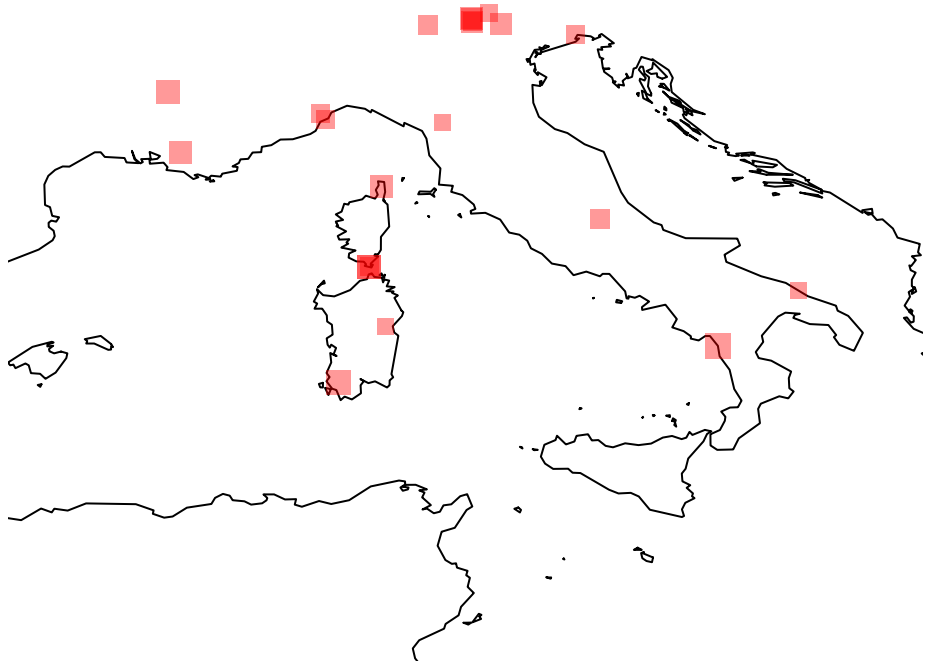

7095 cal. BC

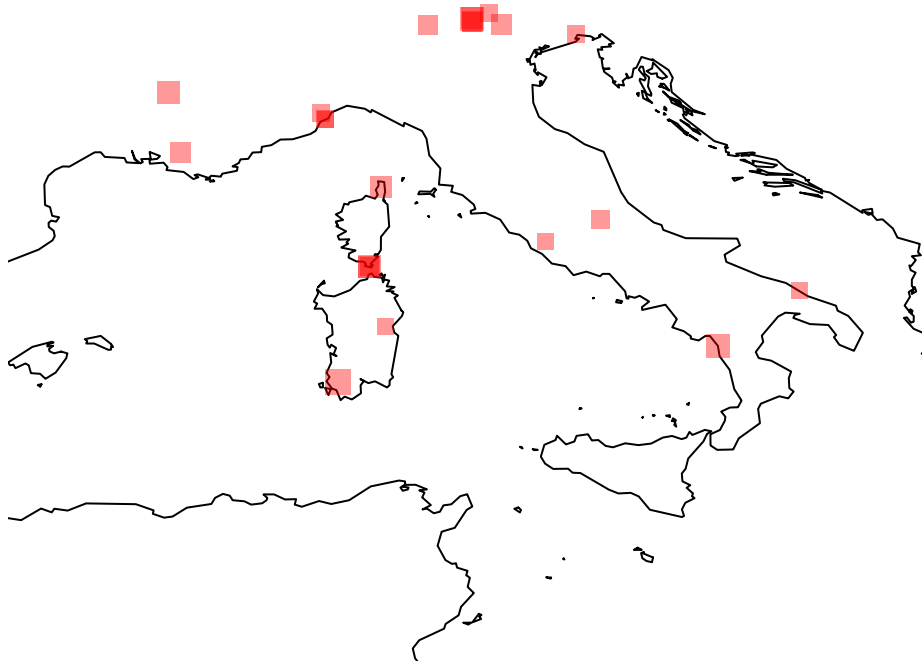

7090 cal. BC

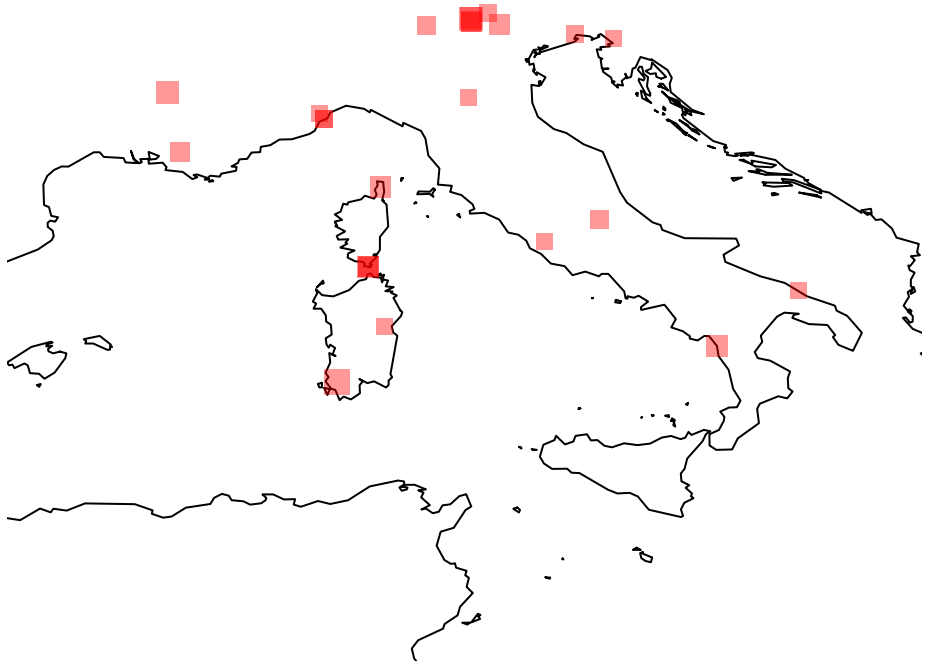





7080 cal. BC

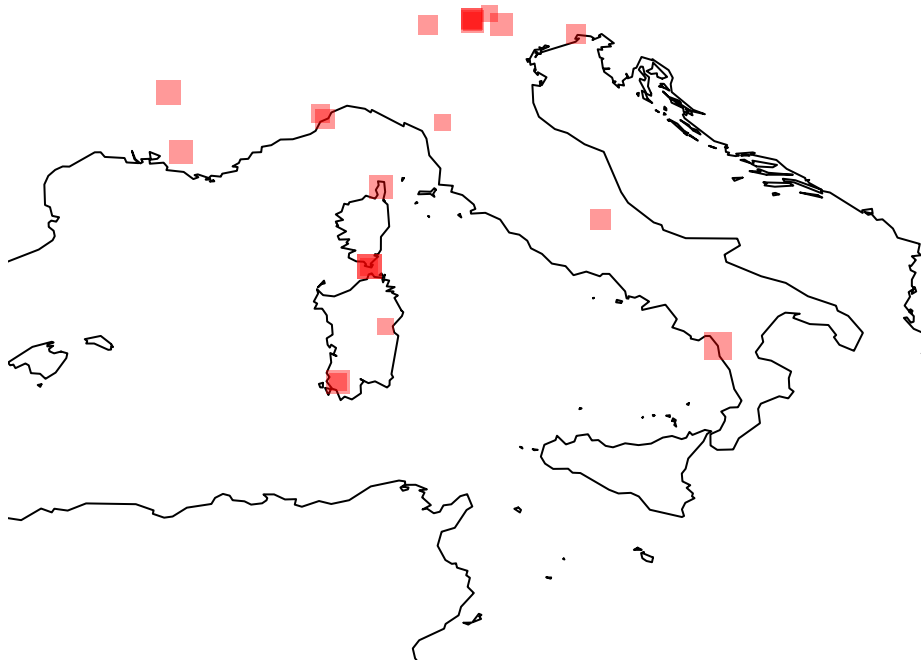

7075 cal. BC

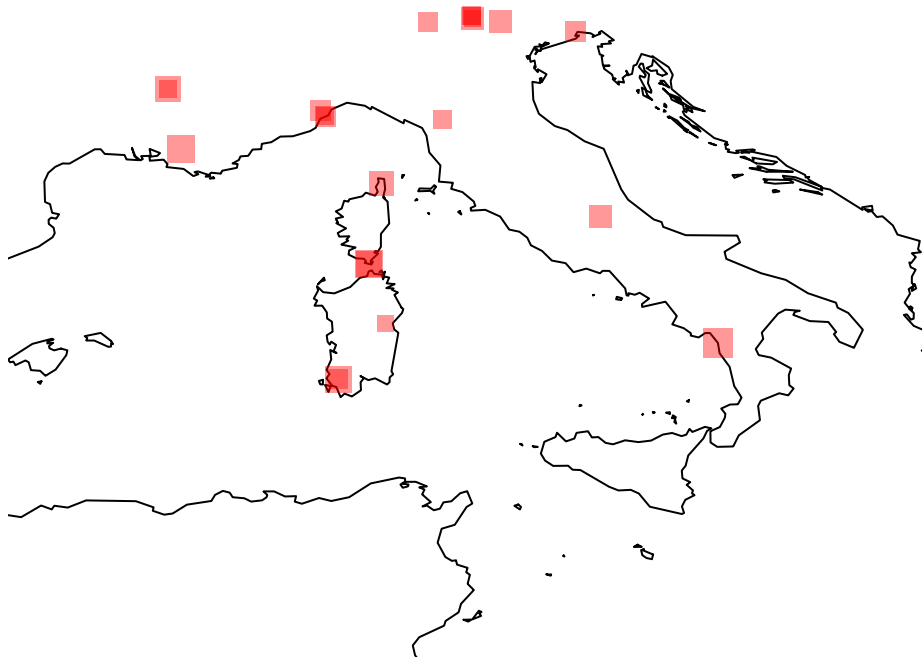

7070 cal. BC

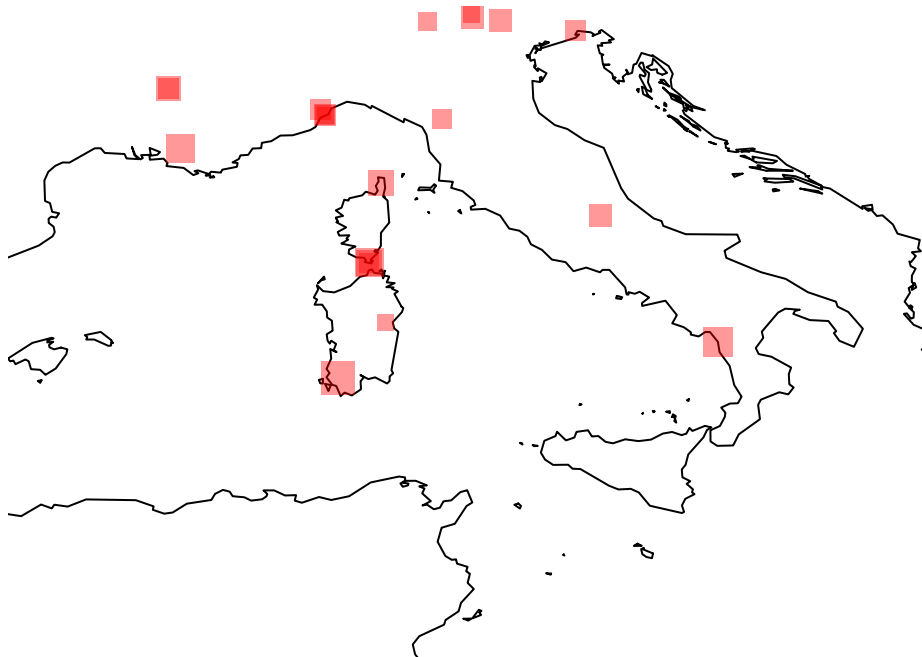



7060 cal. BC

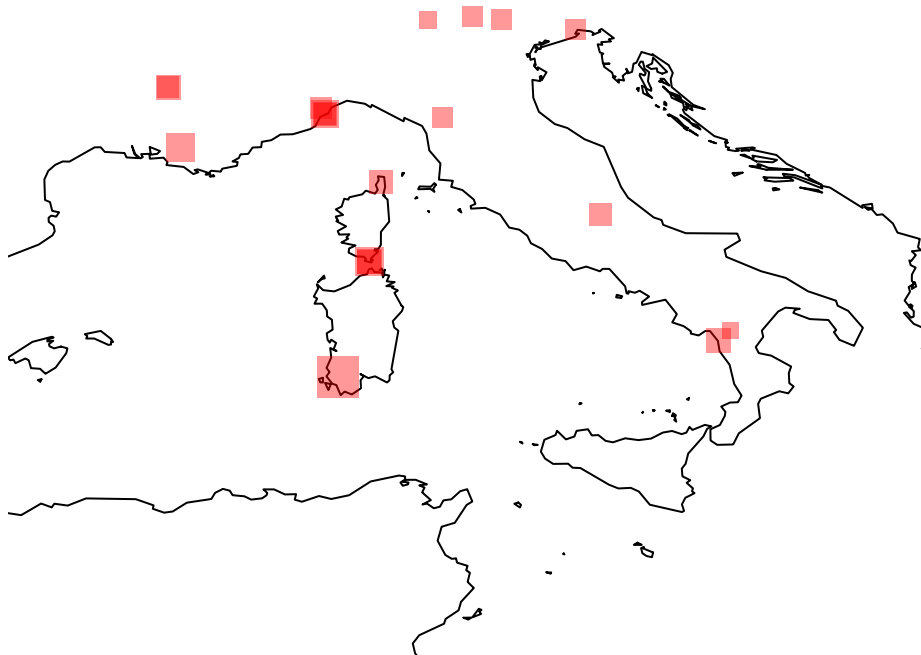

7055 cal. BC

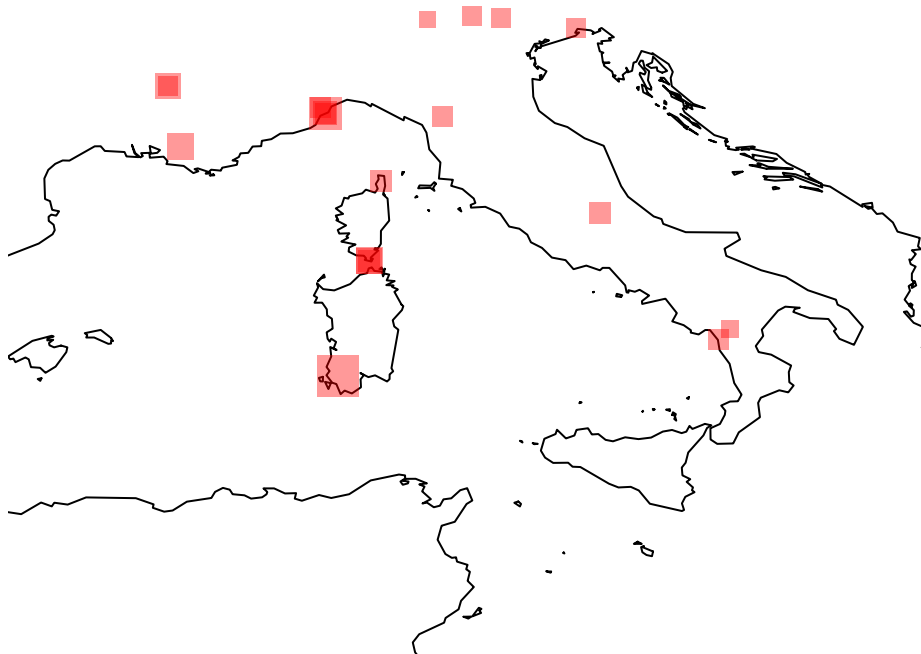

7050 cal. BC

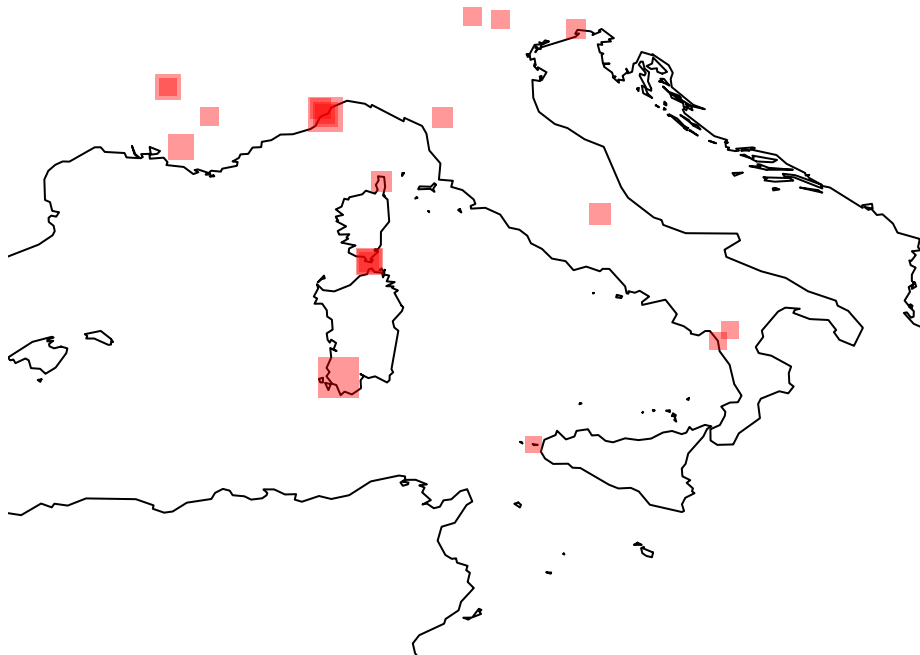



7045 cal. BC

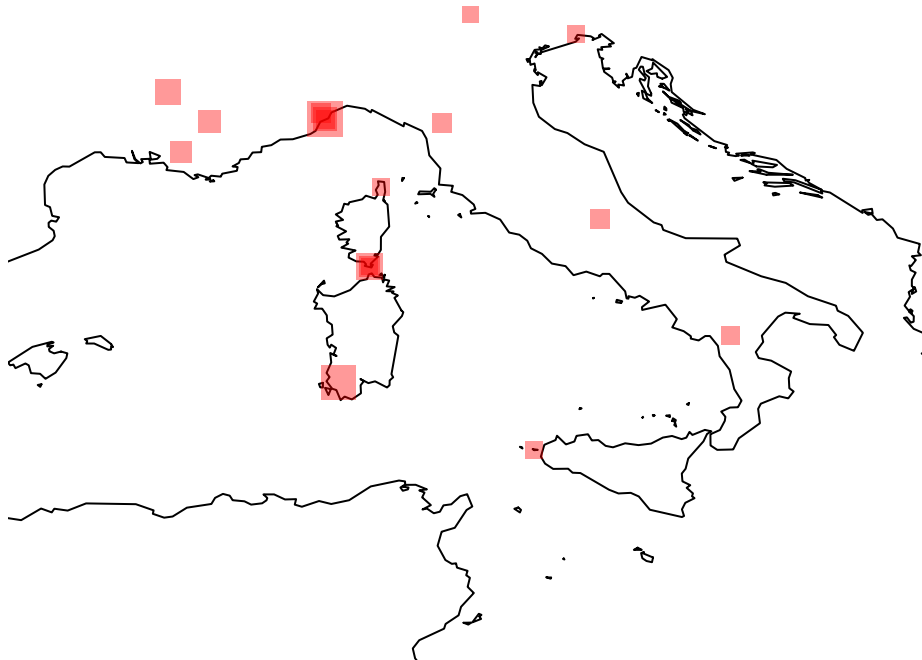

7040 cal. BC

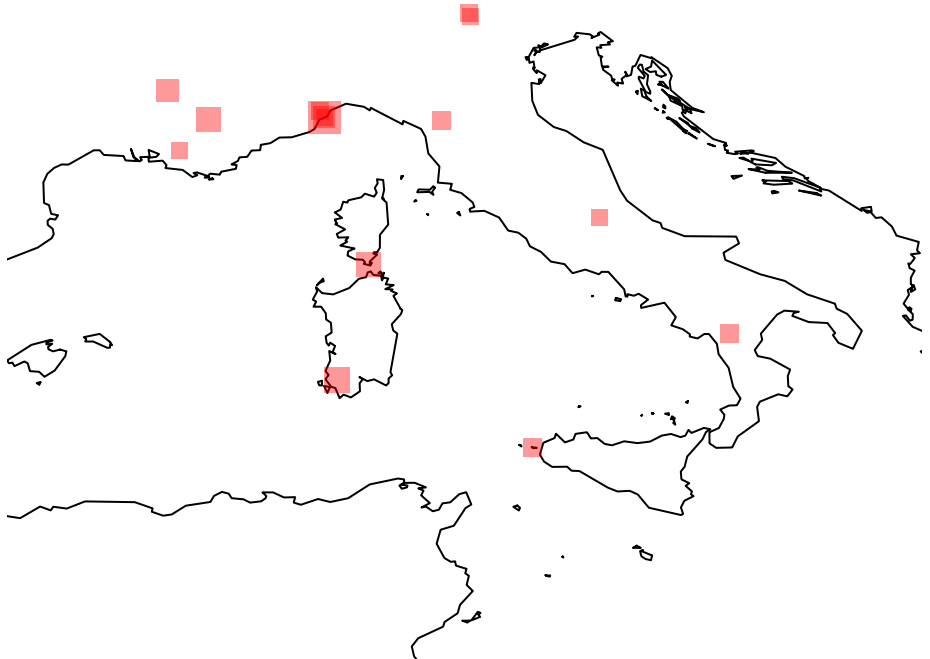

7035 cal. BC

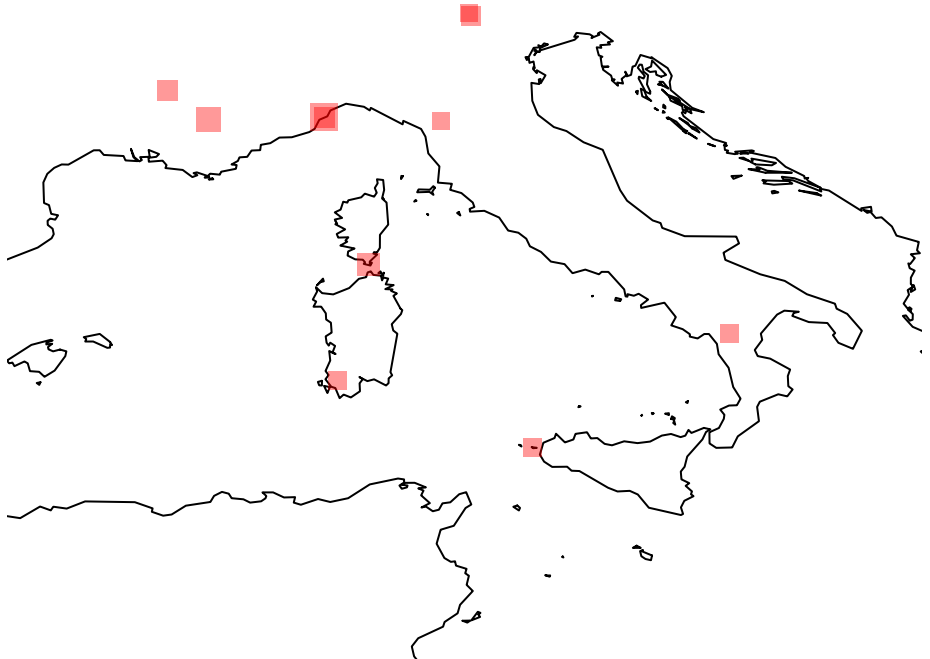

7030 cal. BC

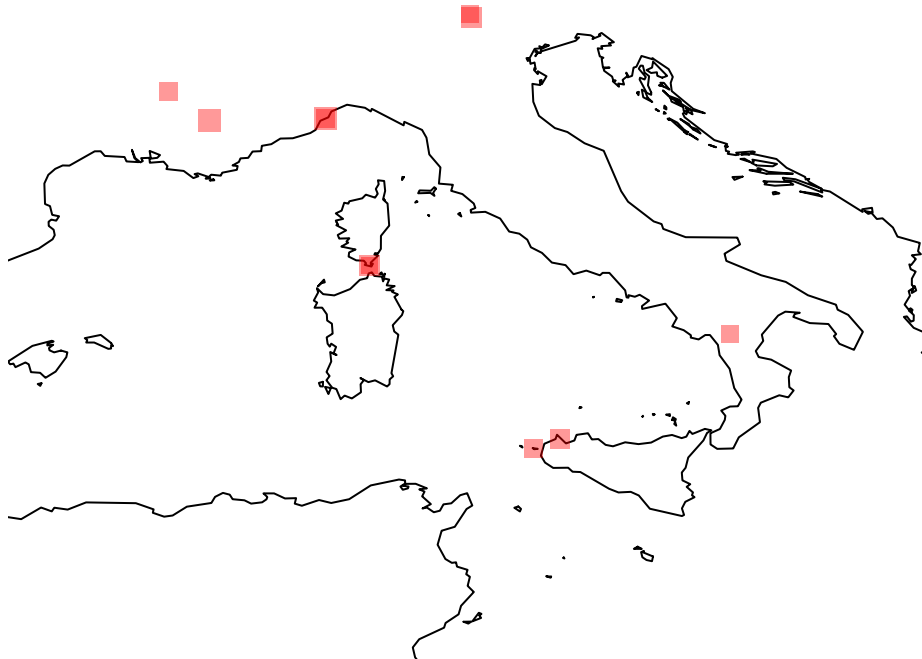

7025 cal. BC

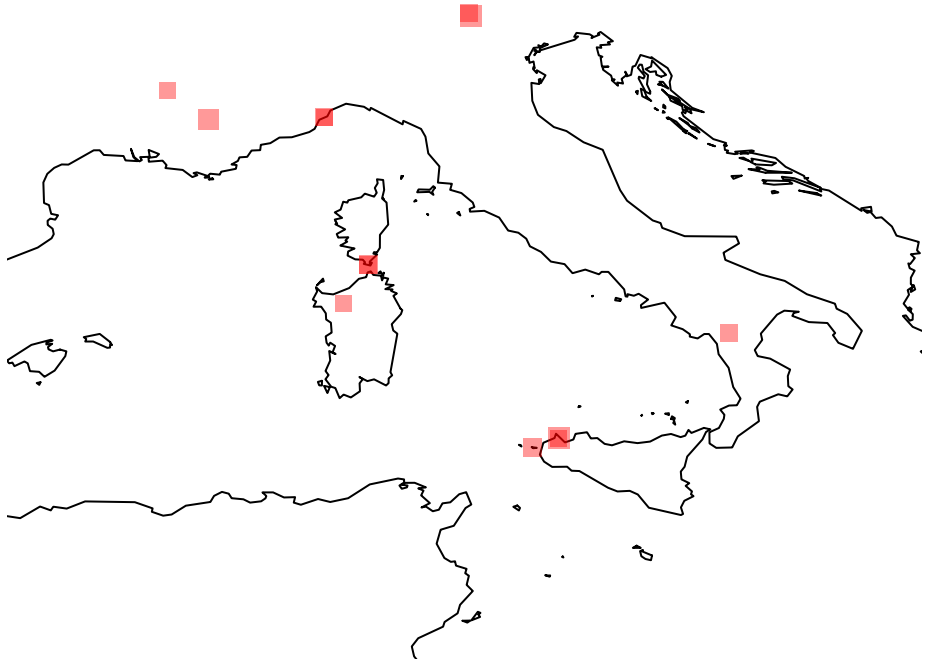

7020 cal. BC

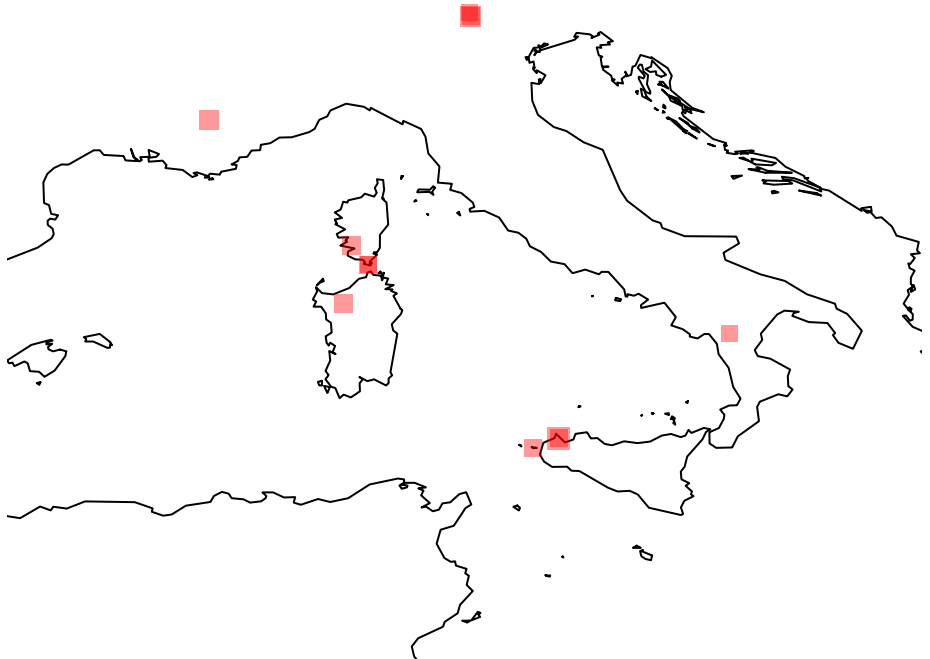



7010 cal. BC

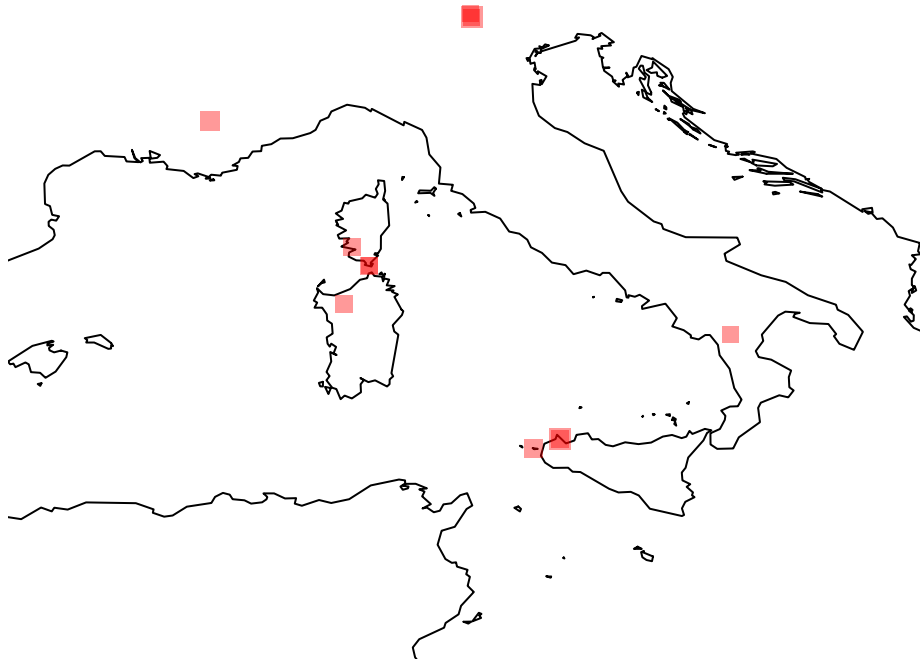



7005 cal. BC

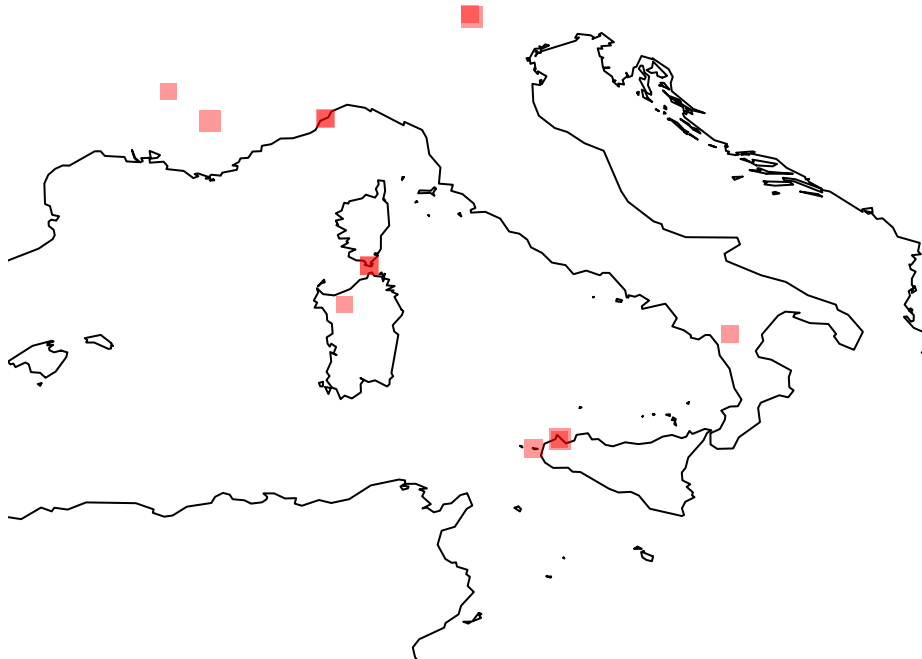

7000 cal. BC

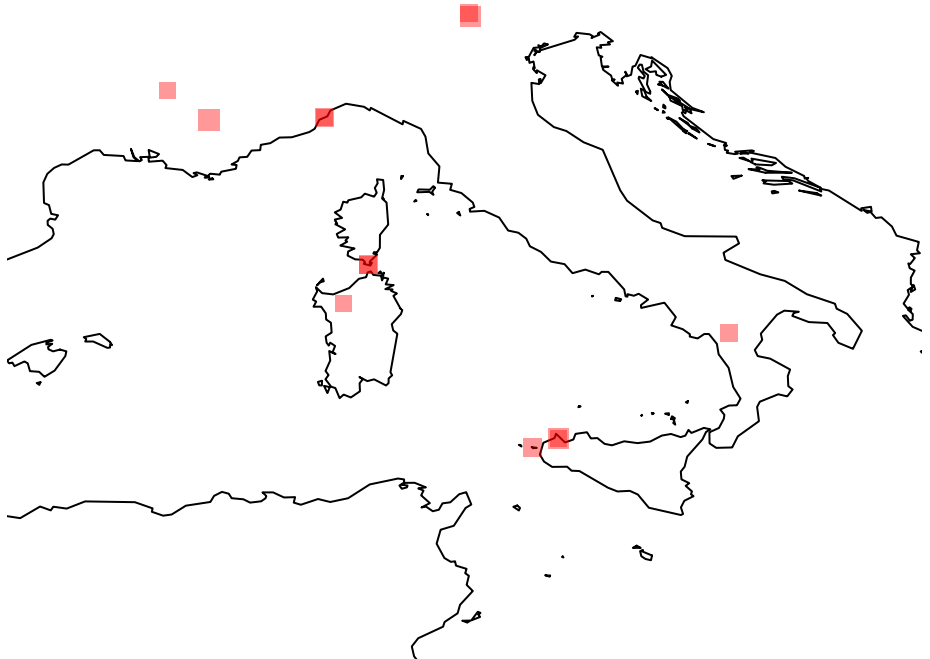

**6995 cal. BC**

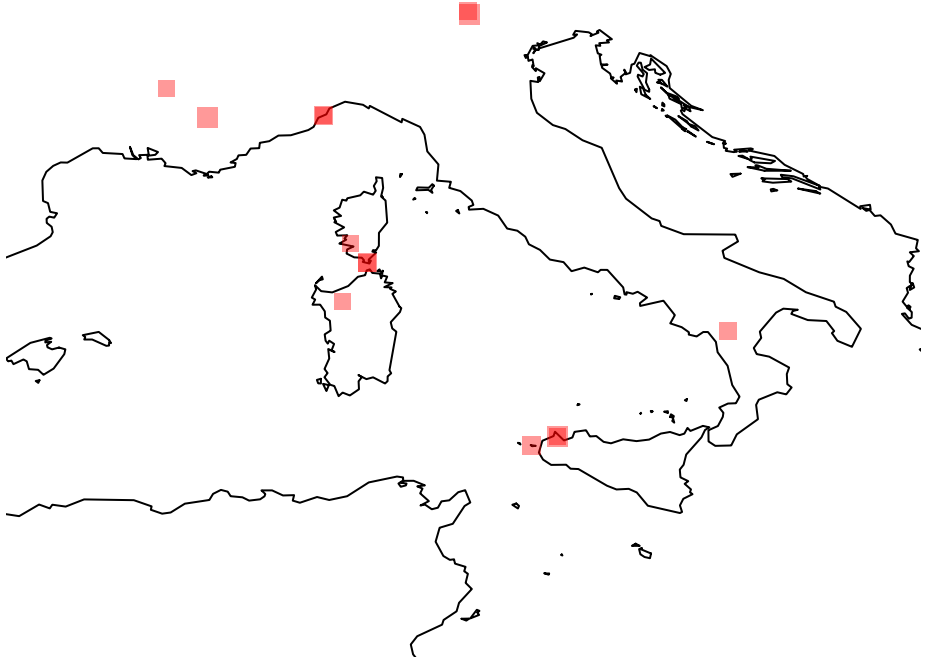

6990 cal. BC

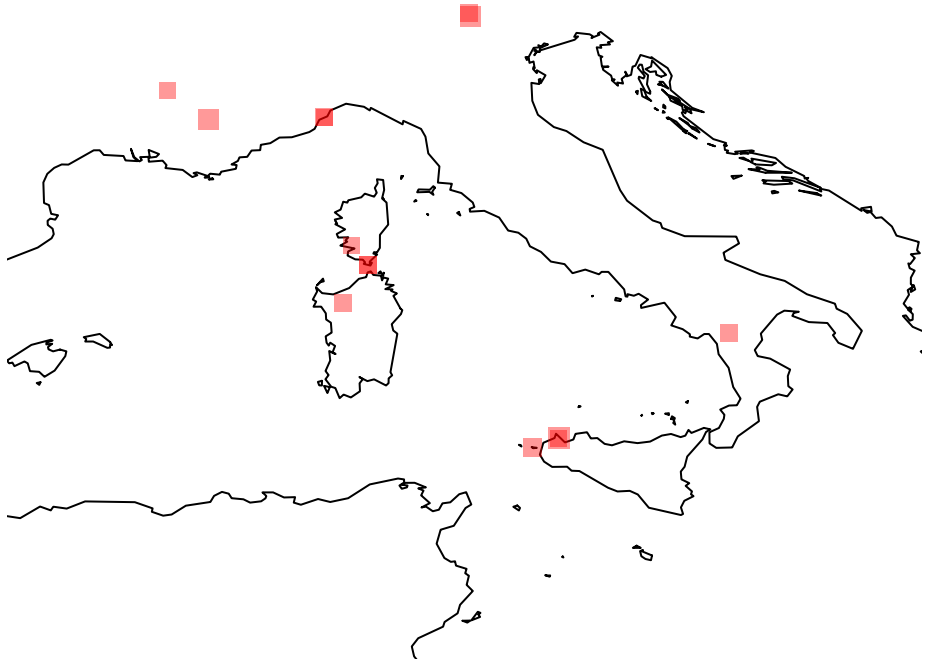

6985 cal. BC

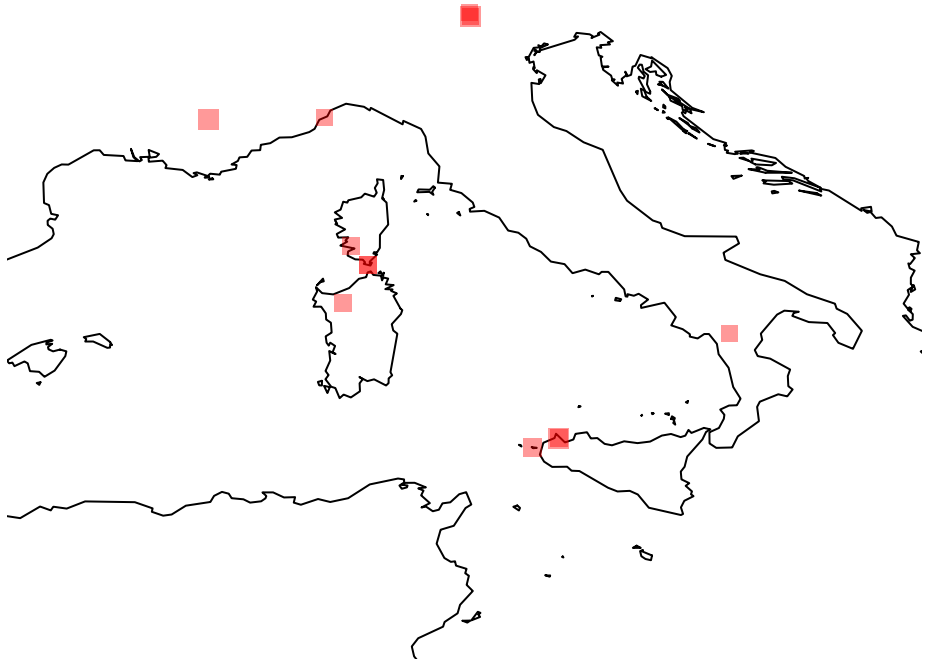

6980 cal. BC

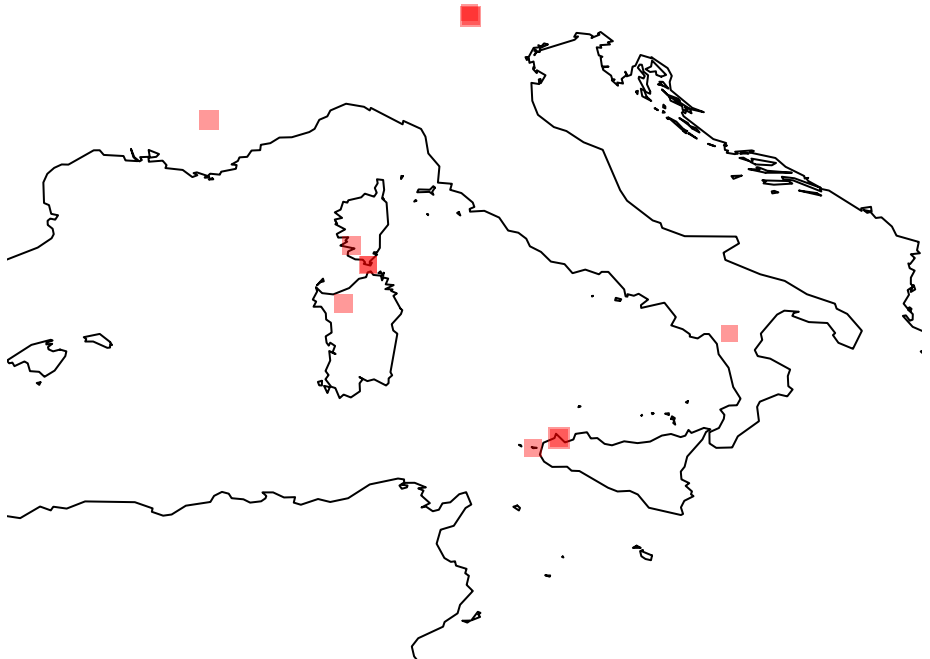

6975 cal. BC

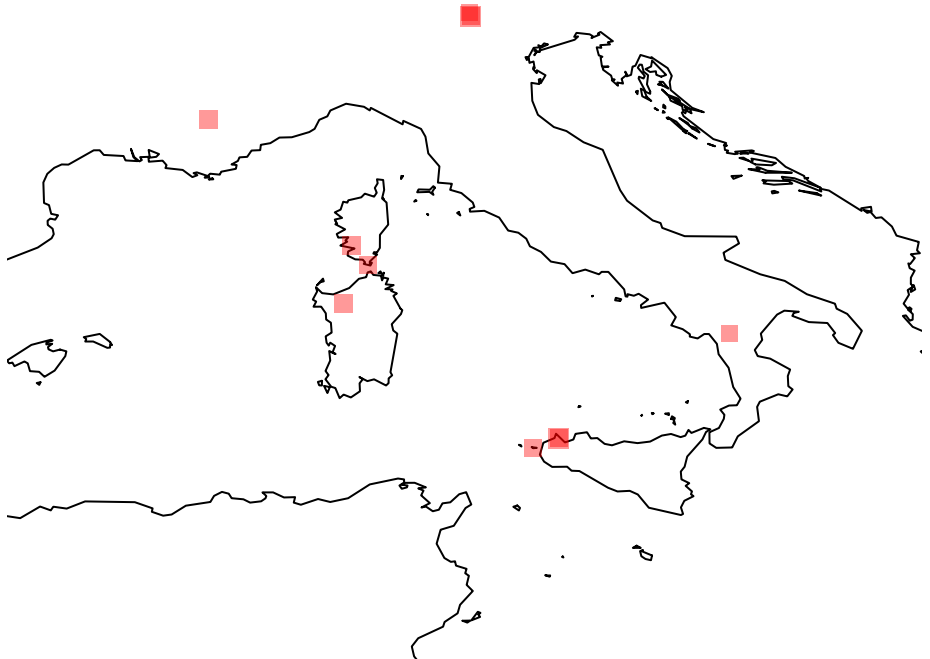

6970 cal. BC

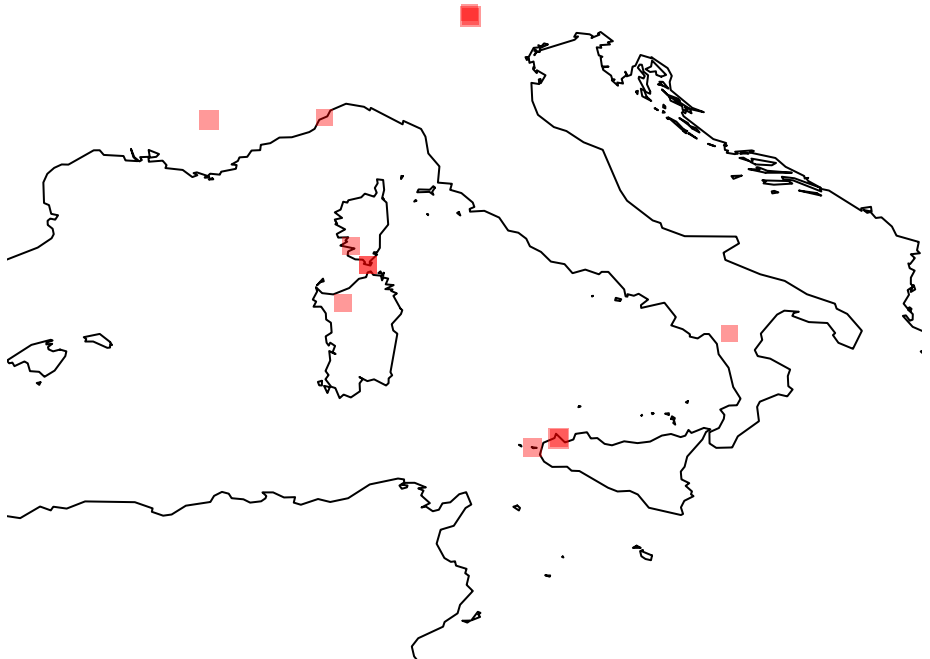



6965 cal. BC

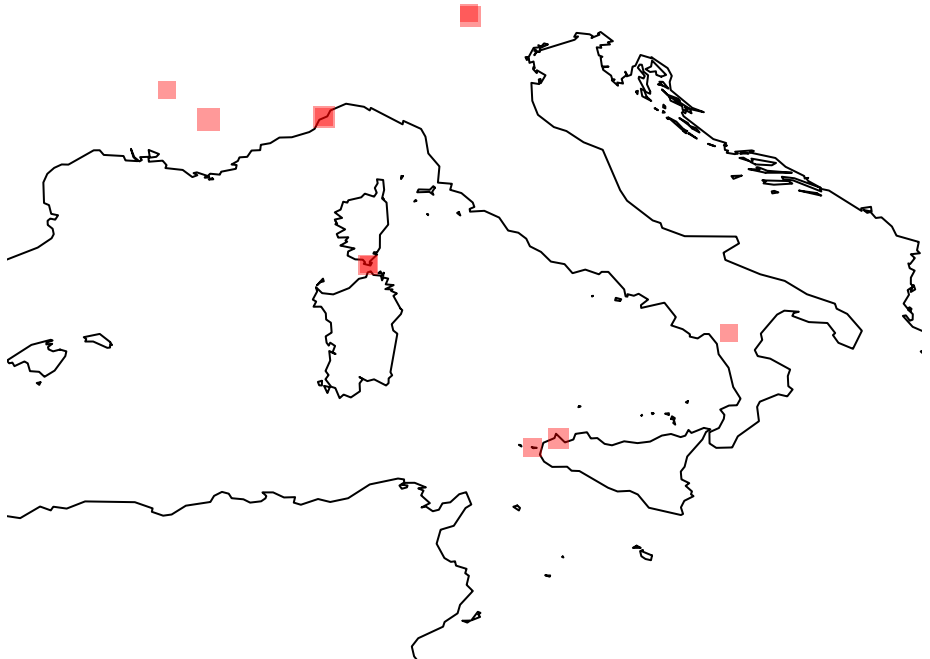

6960 cal. BC

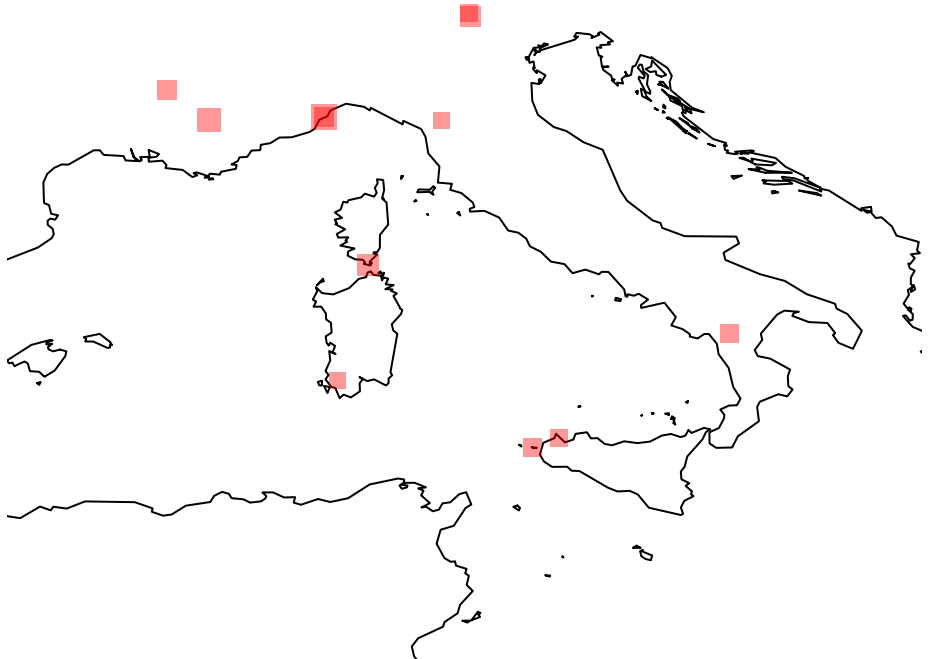

6955 cal. BC

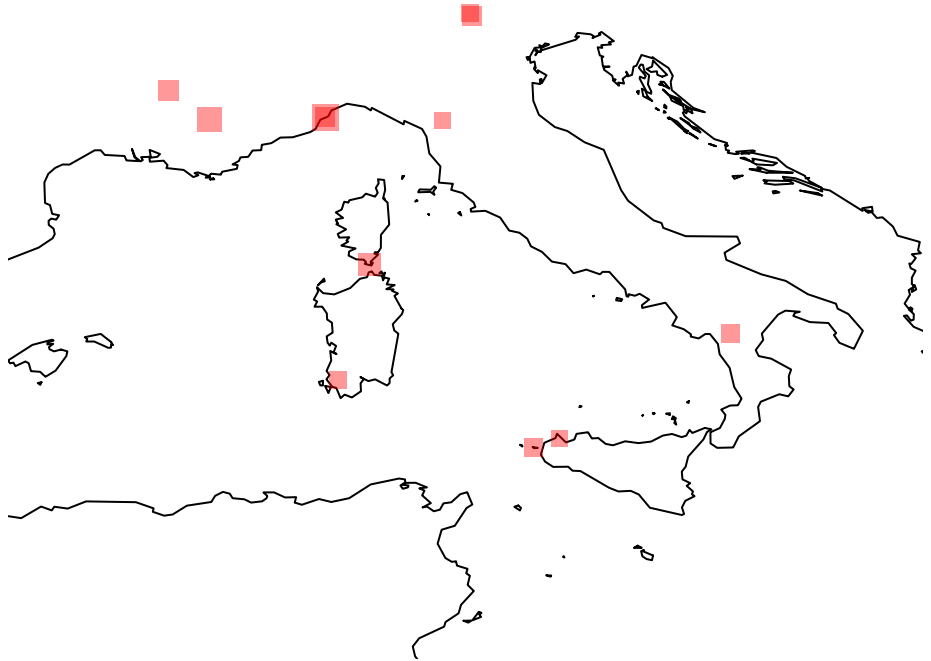

6950 cal. BC

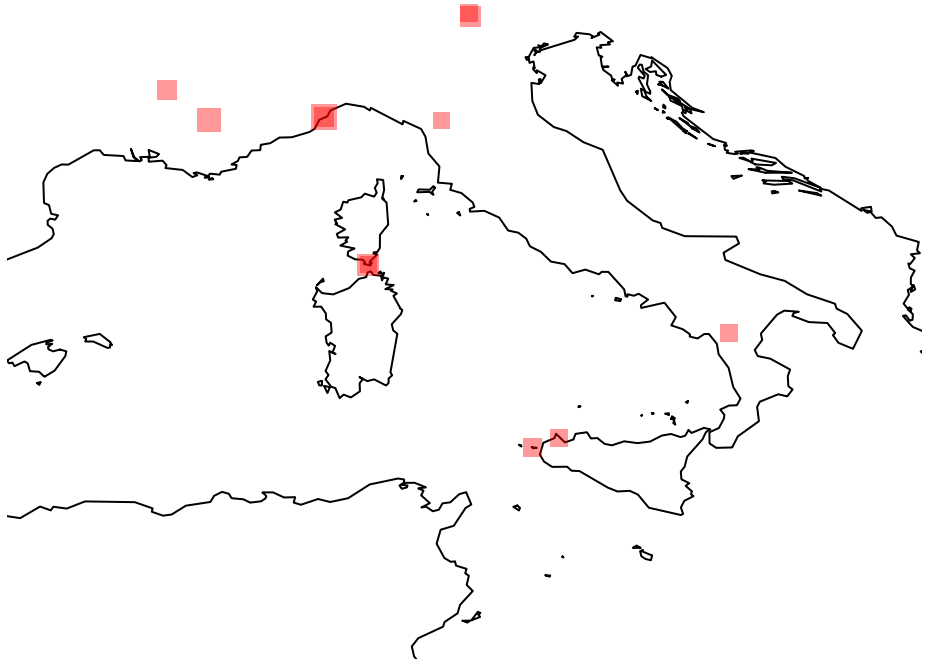

6945 cal. BC

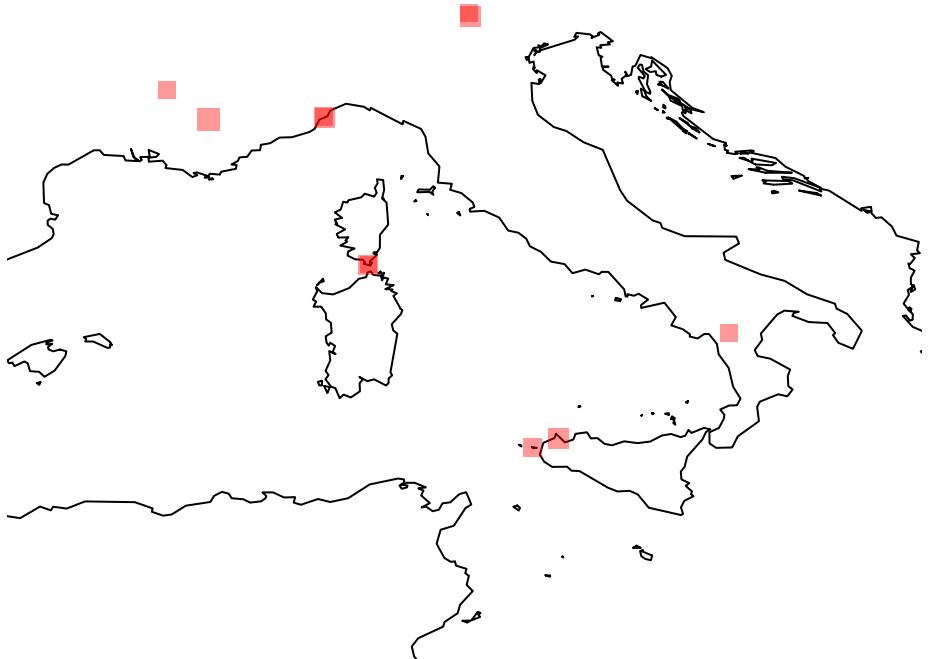

6940 cal. BC

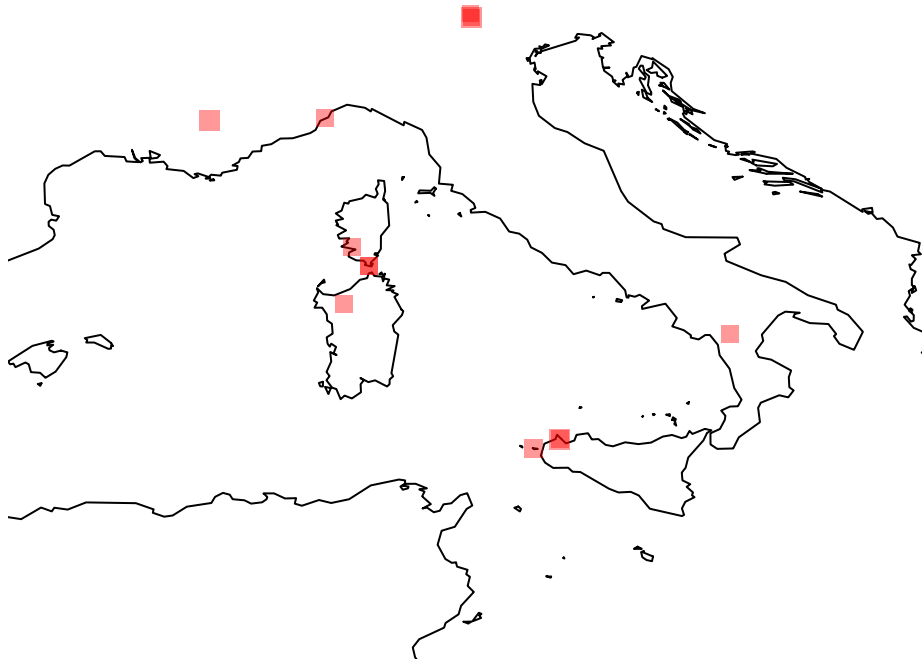

6935 cal. BC

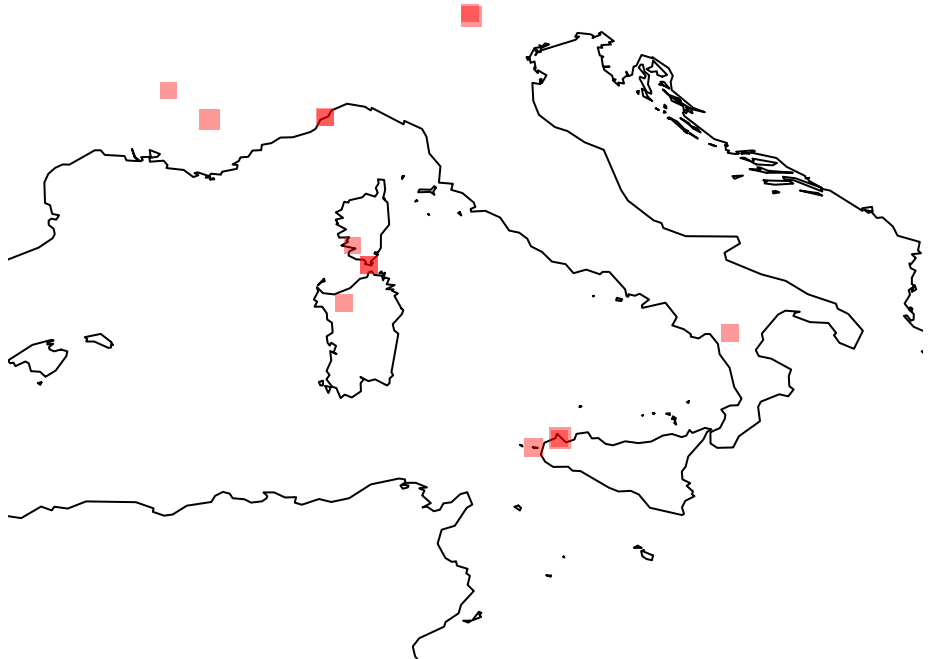

6930 cal. BC

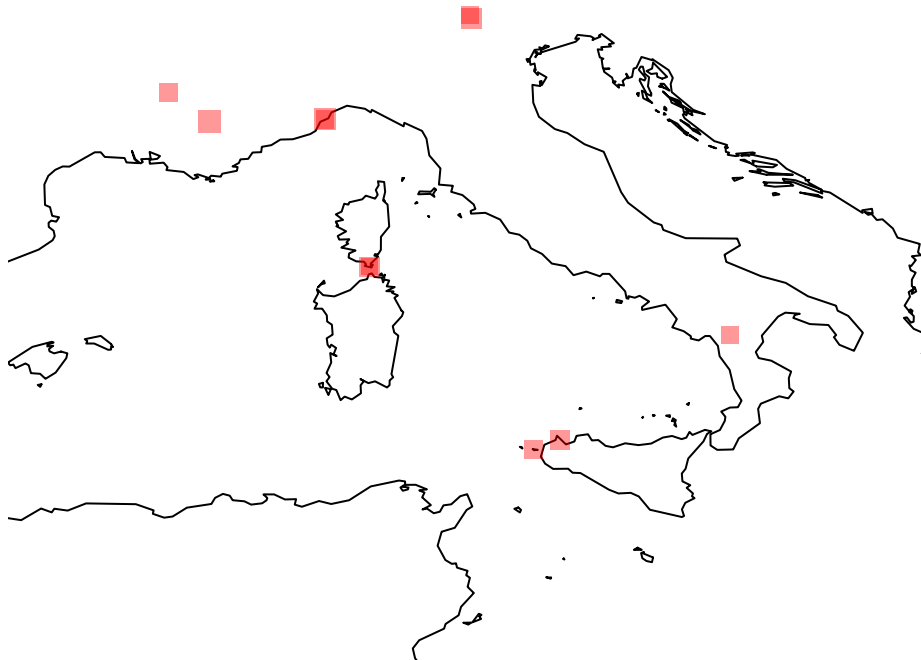



6925 cal. BC



6920 cal. BC

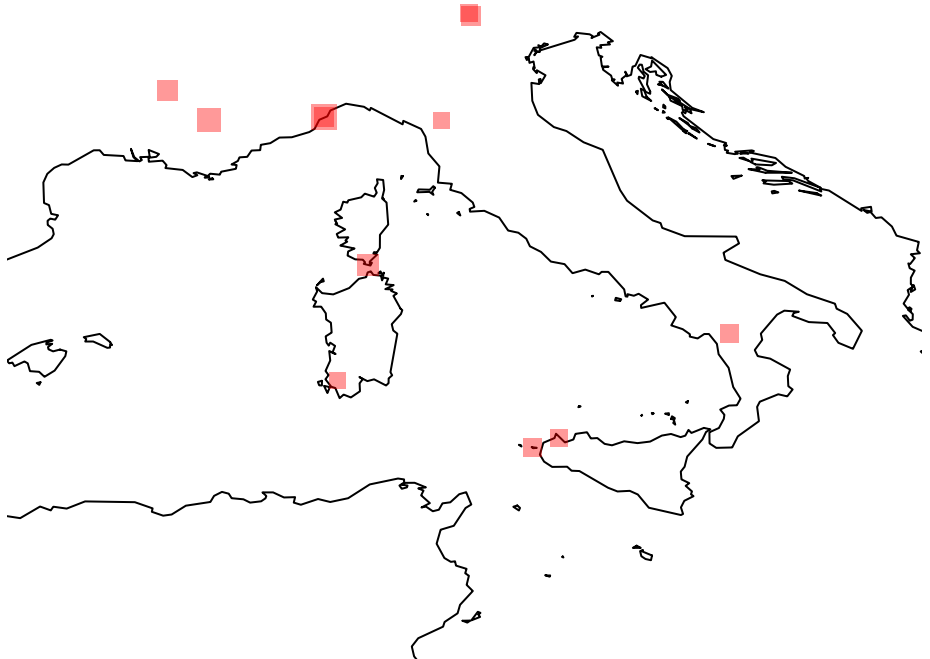

6915 cal. BC

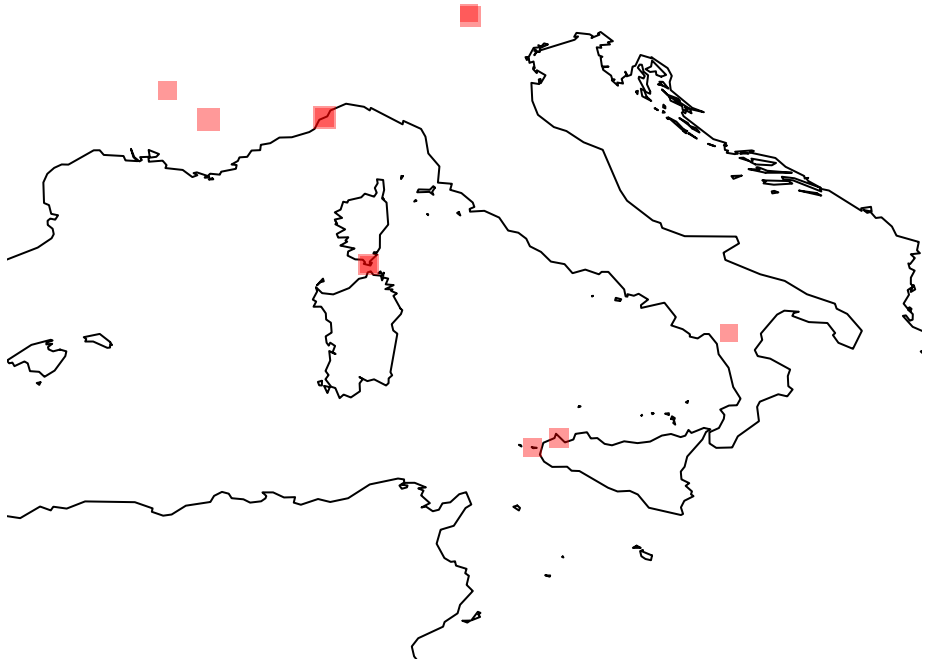

6910 cal. BC

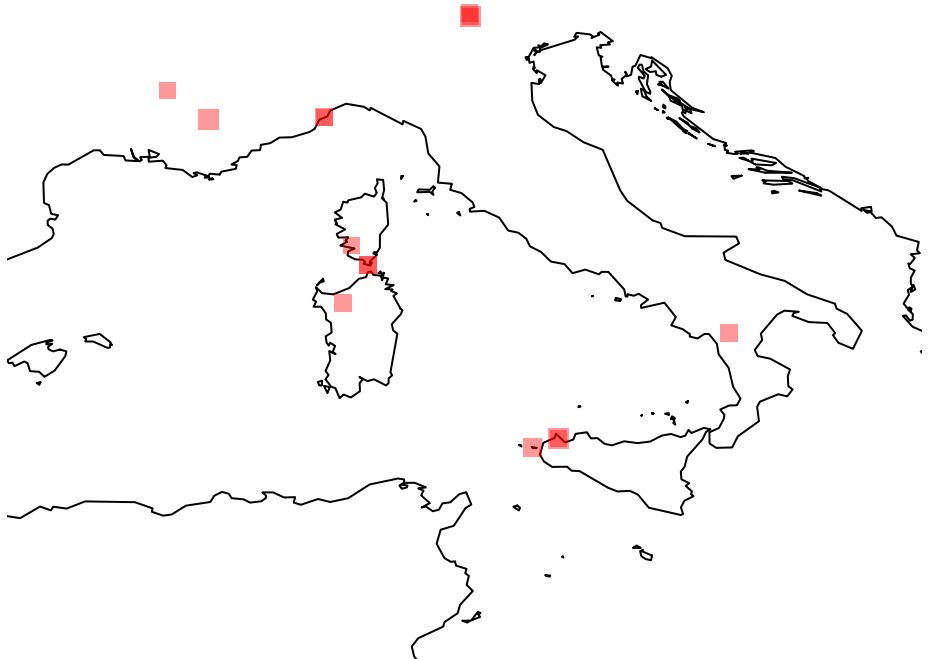

6905 cal. BC

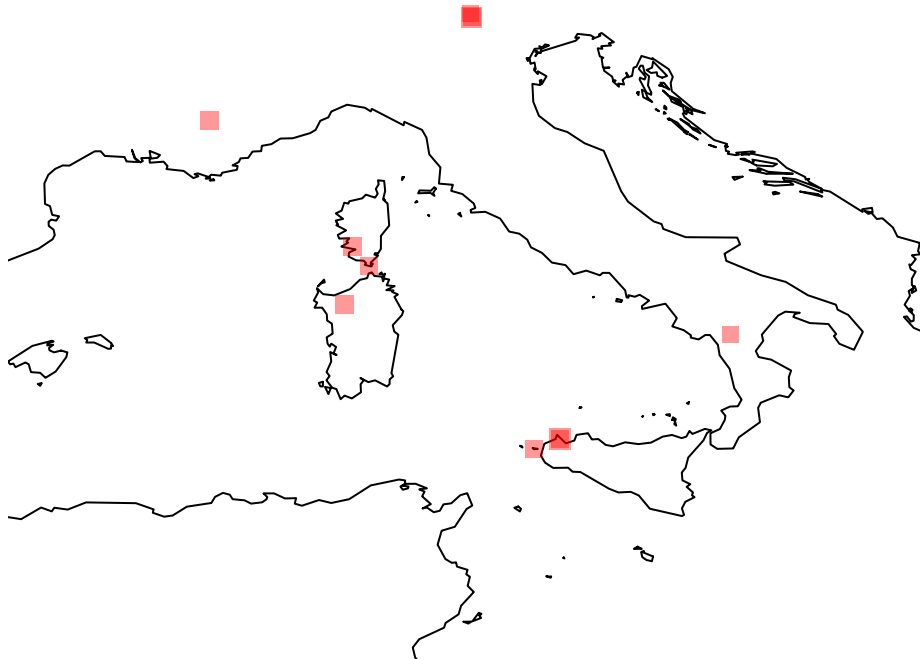

6900 cal. BC

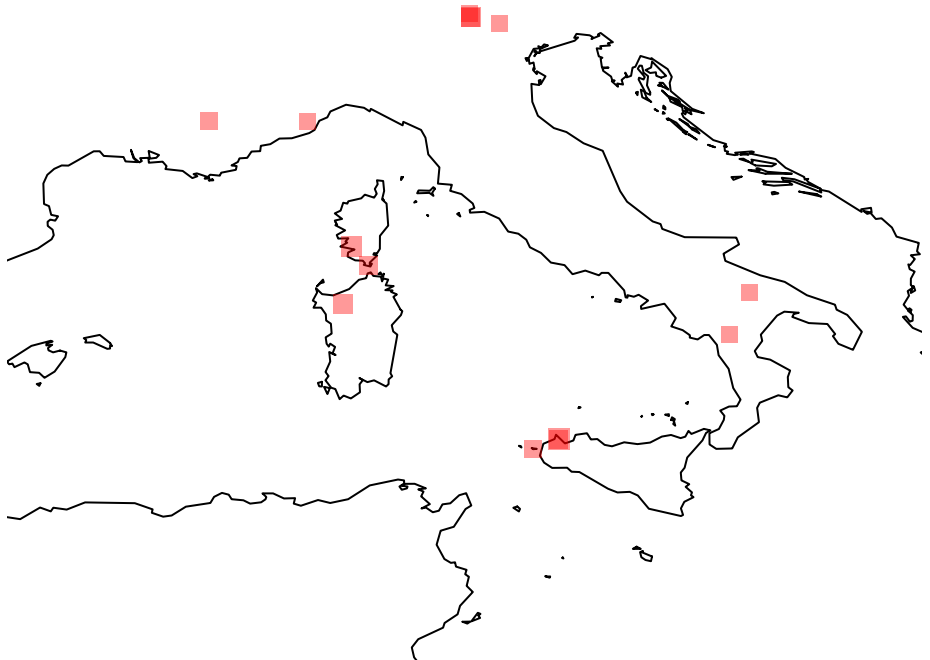

6895 cal. BC

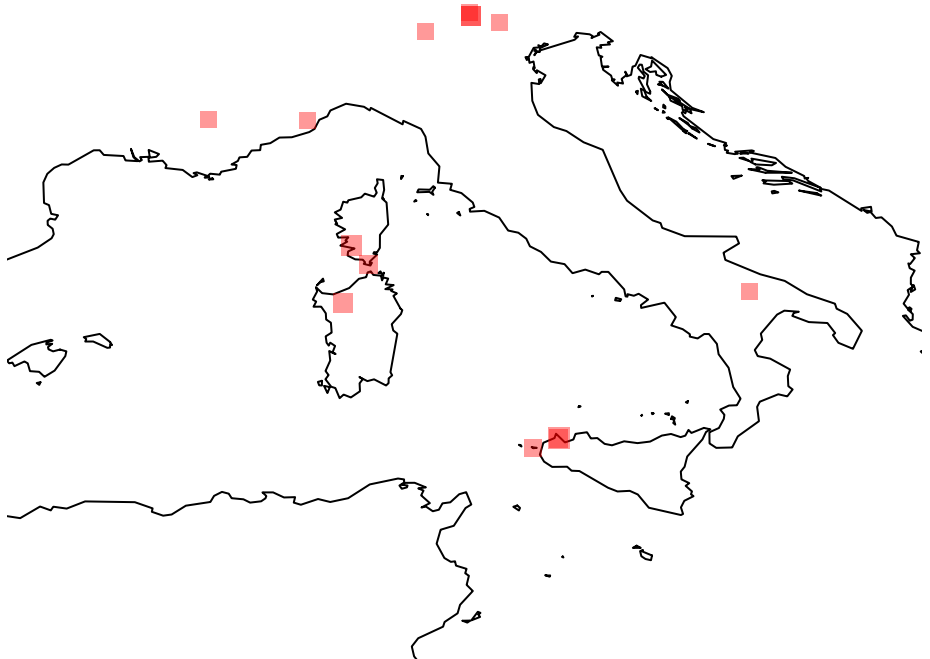

6890 cal. BC

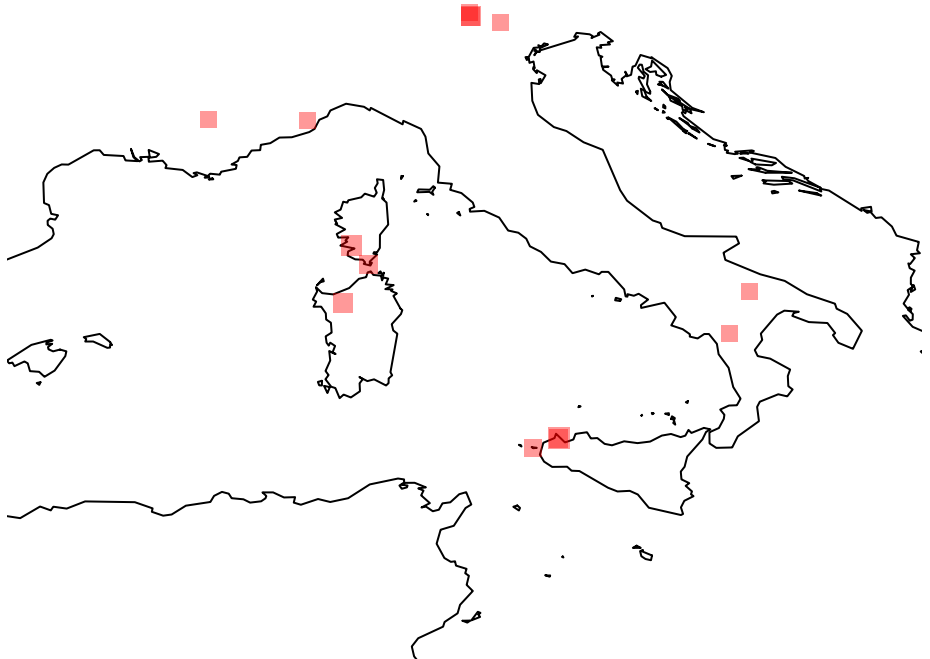



6885 cal. BC

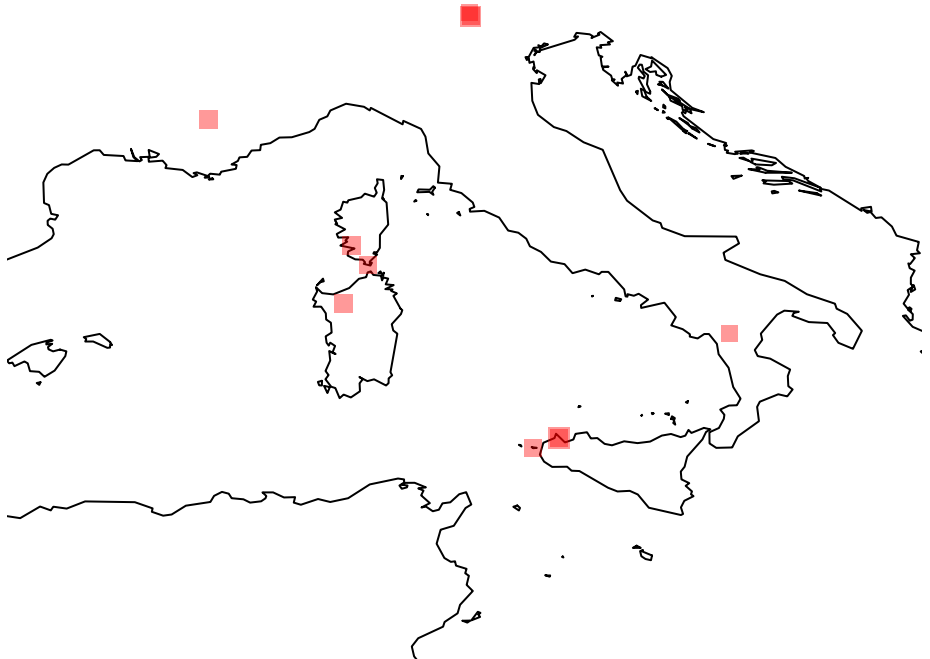

6880 cal. BC

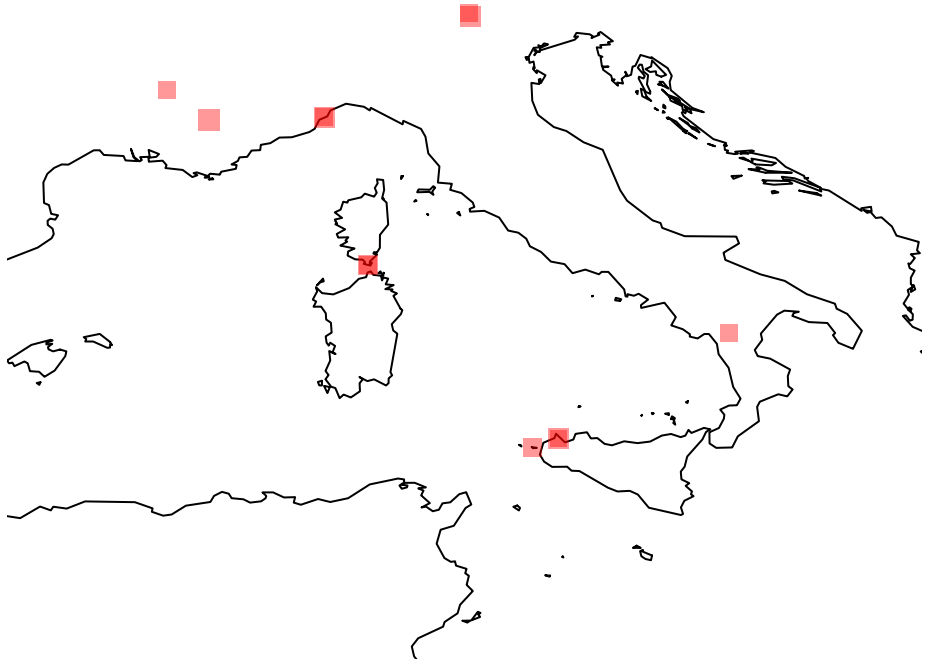

6875 cal. BC

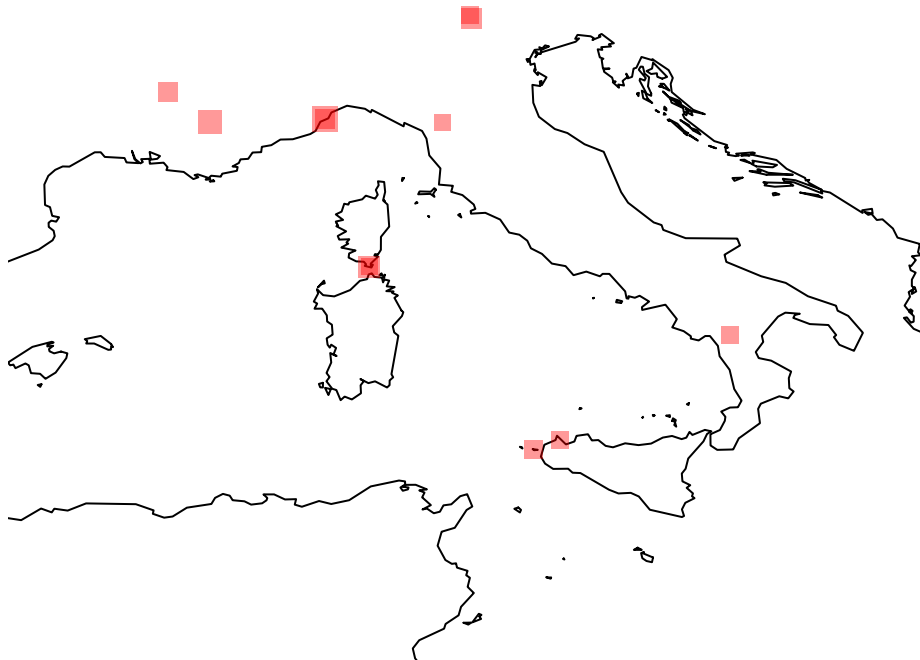

6870 cal. BC

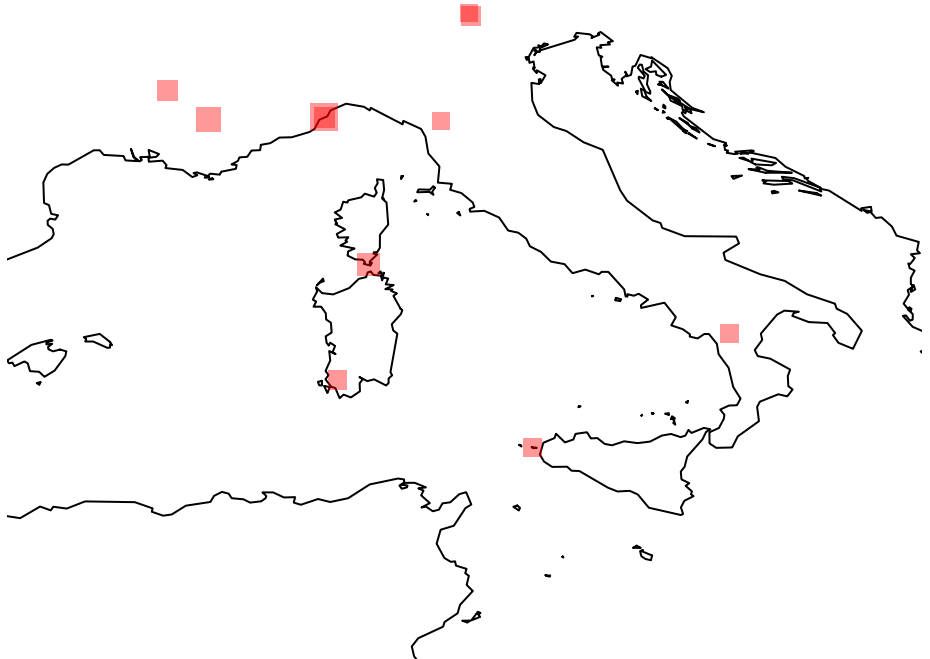

6865 cal. BC

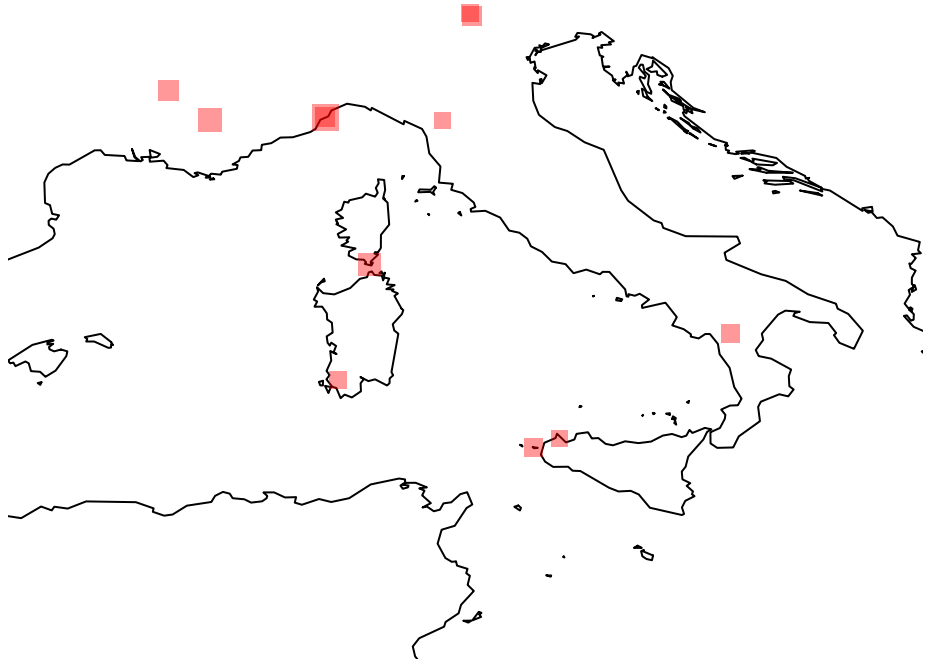

6860 cal. BC

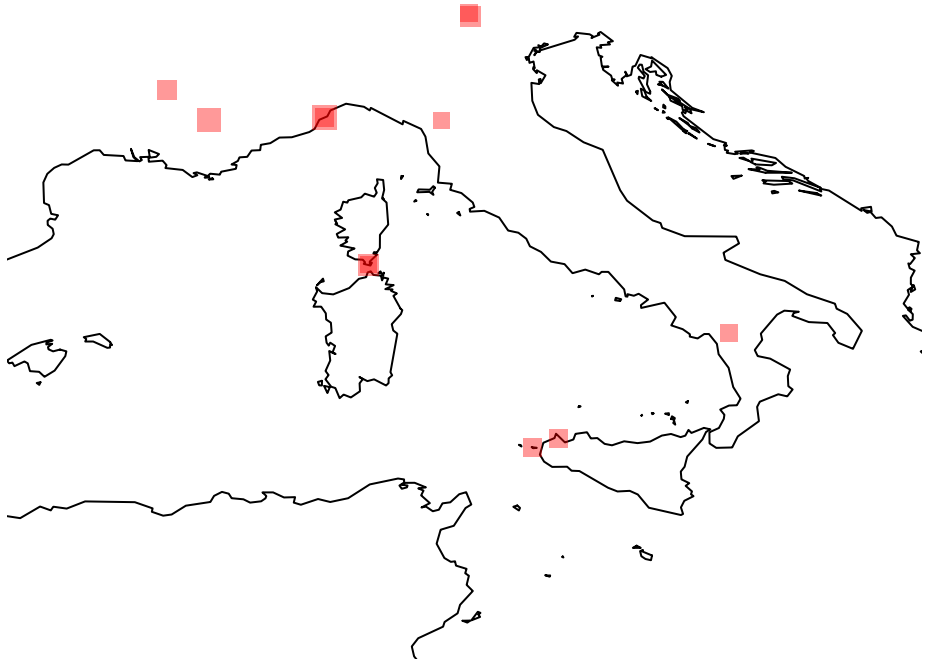

6855 cal. BC

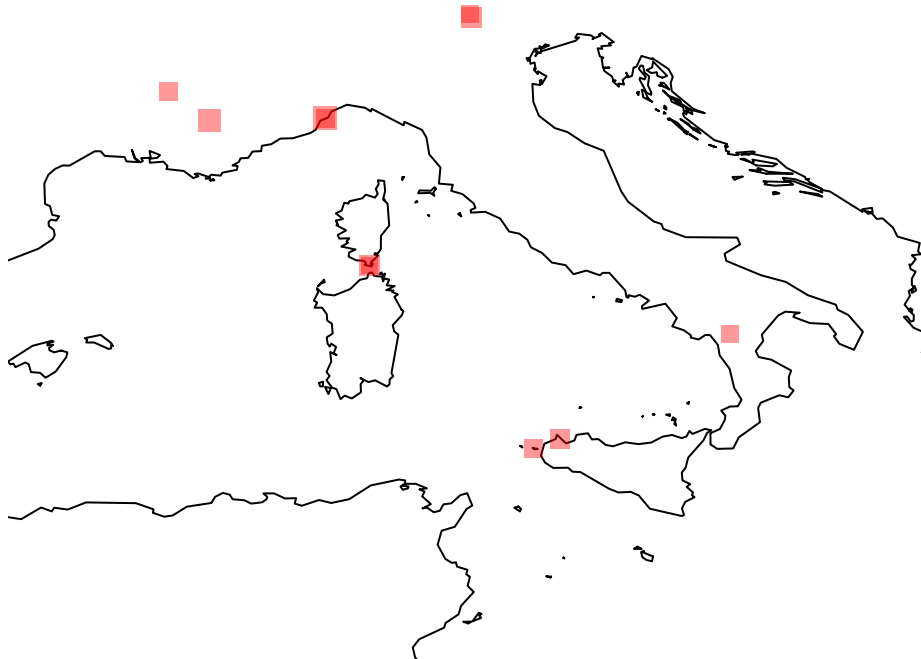

**6850 cal. BC**

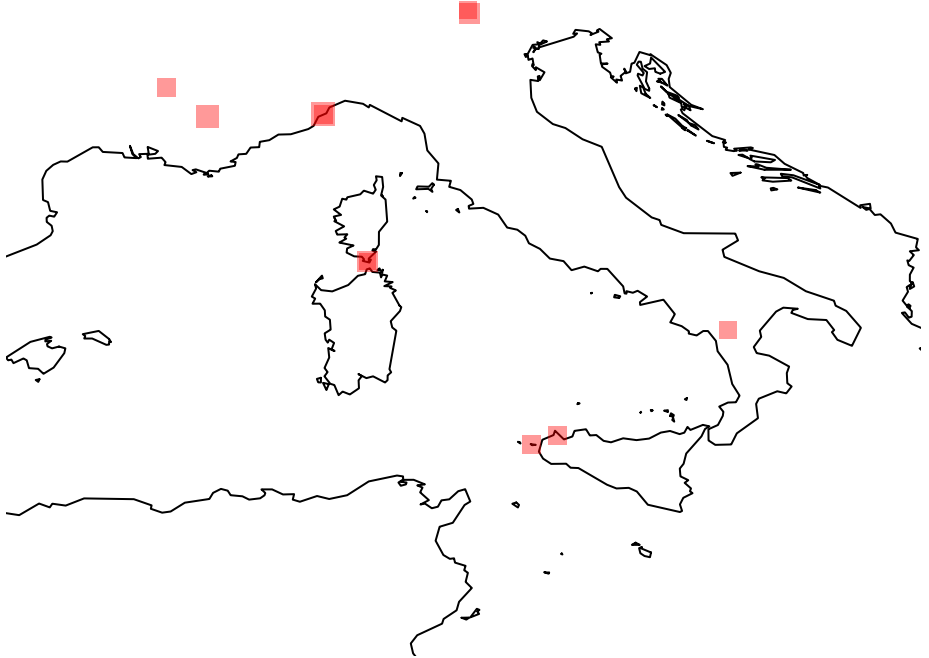



6845 cal. BC

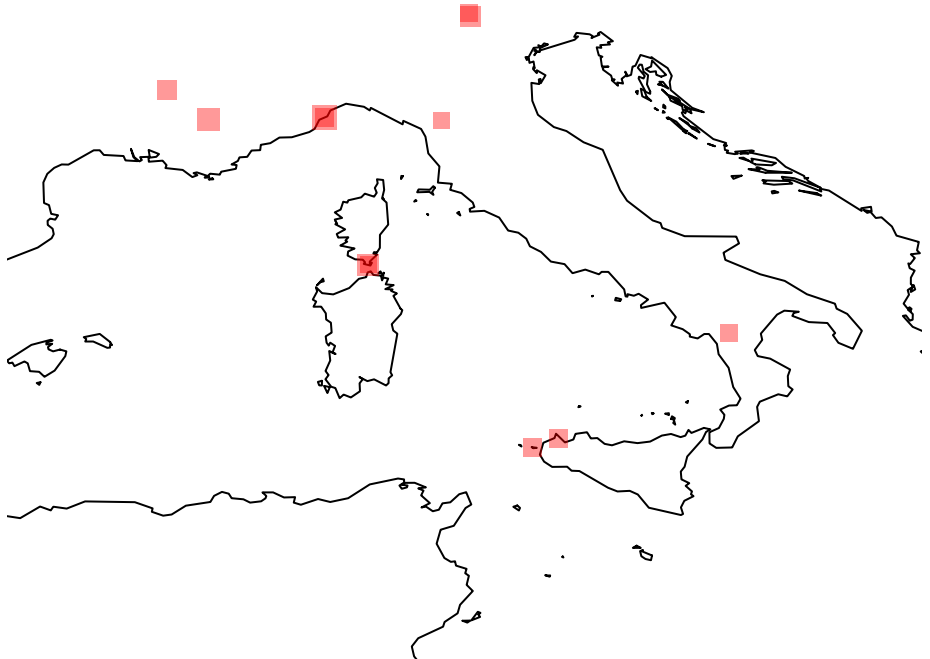

6840 cal. BC

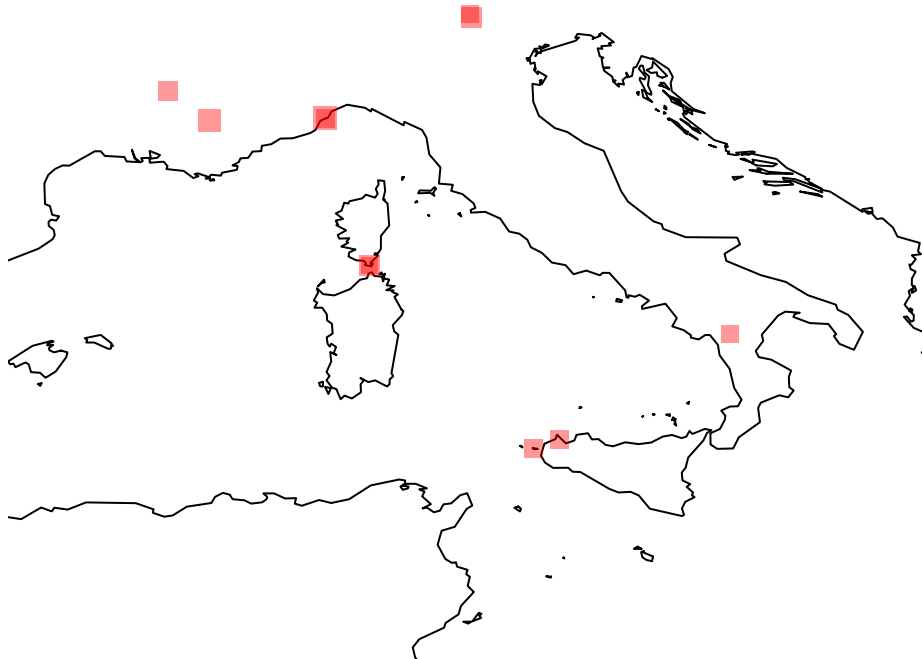

6835 cal. BC

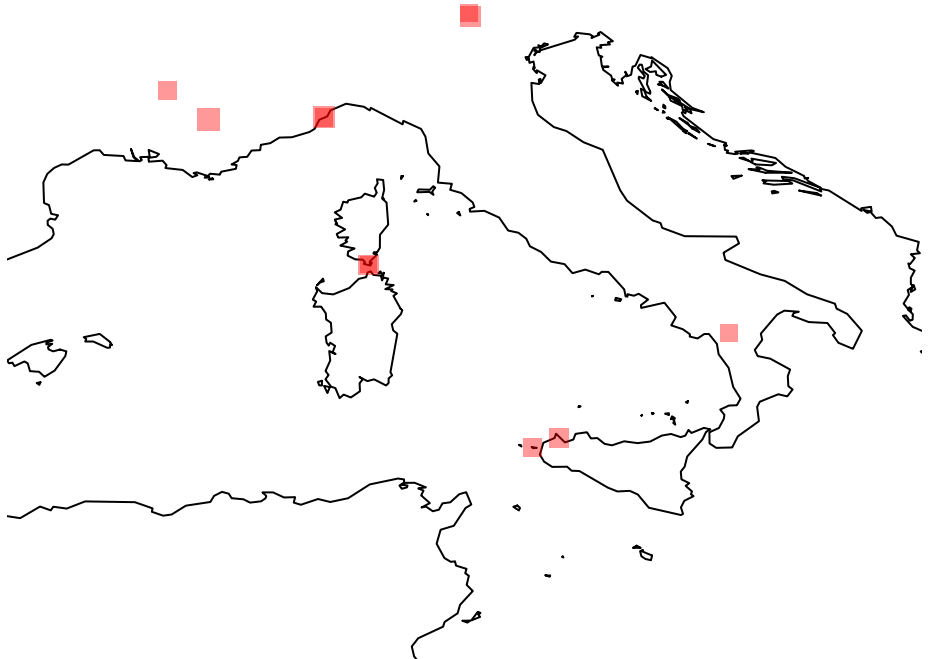

6830 cal. BC

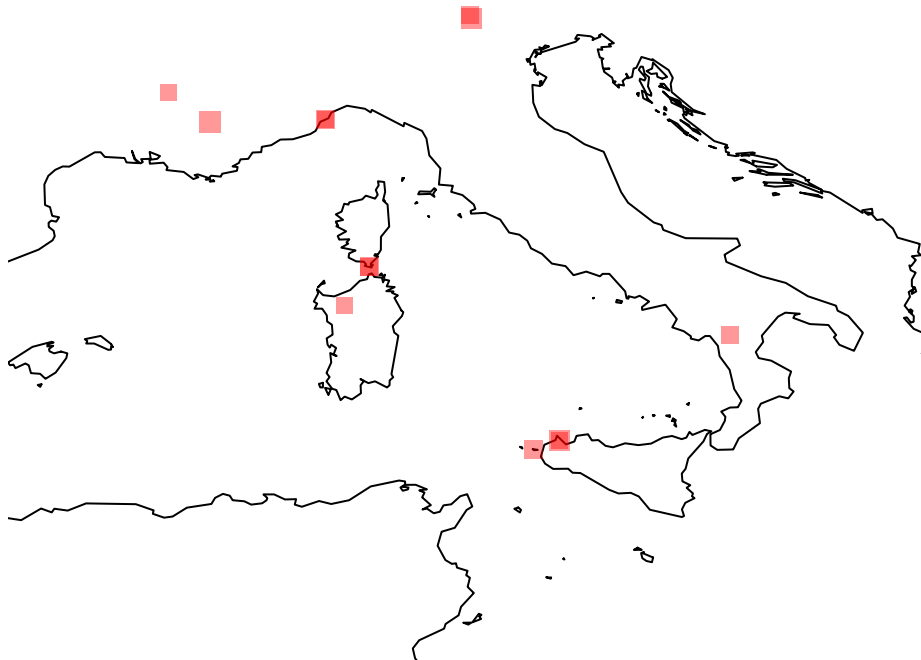

6825 cal. BC

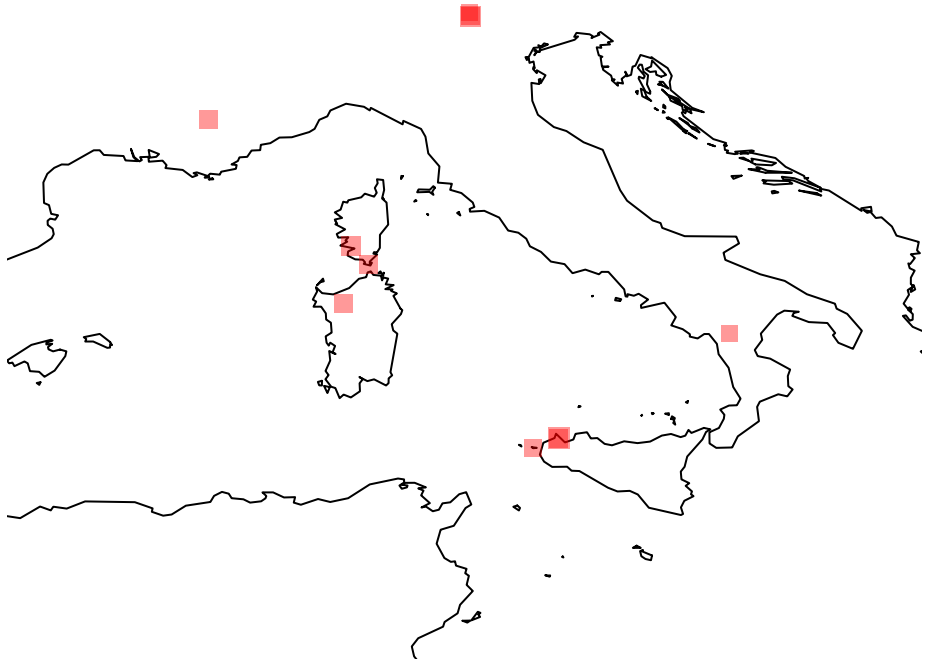

6820 cal. BC

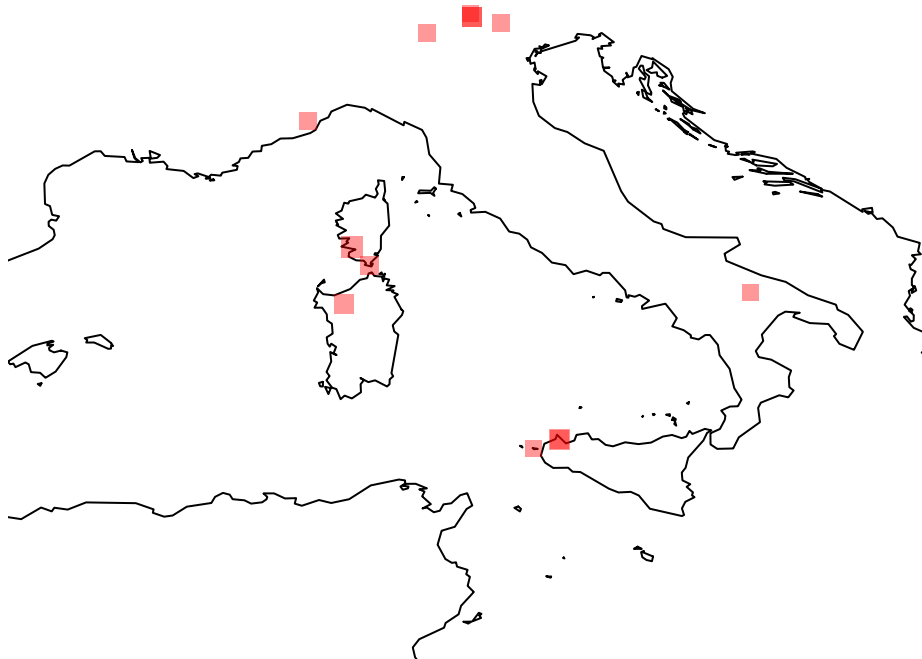

6815 cal. BC

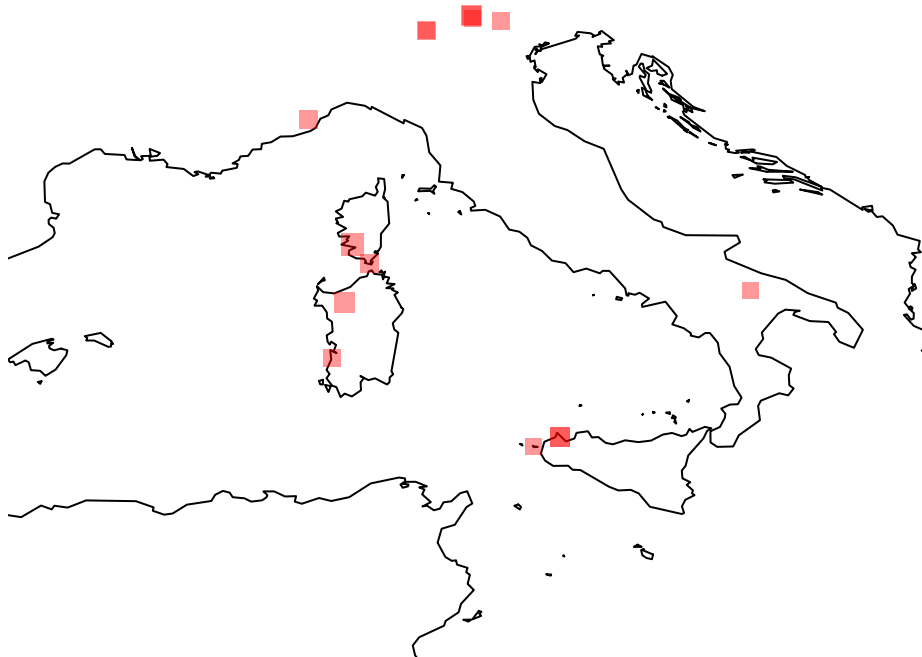

6810 cal. BC

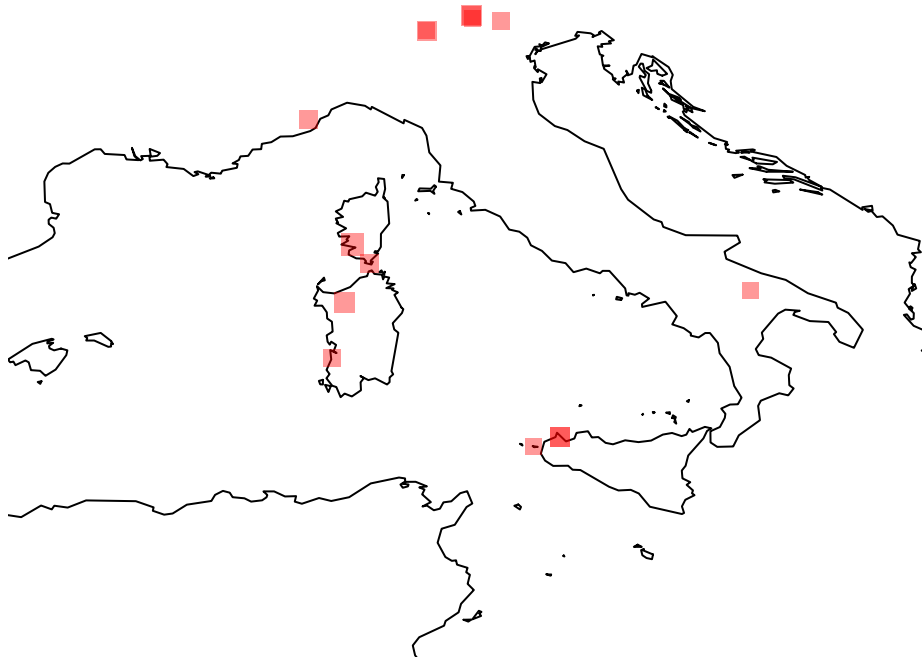



6805 cal. BC



6800 cal. BC

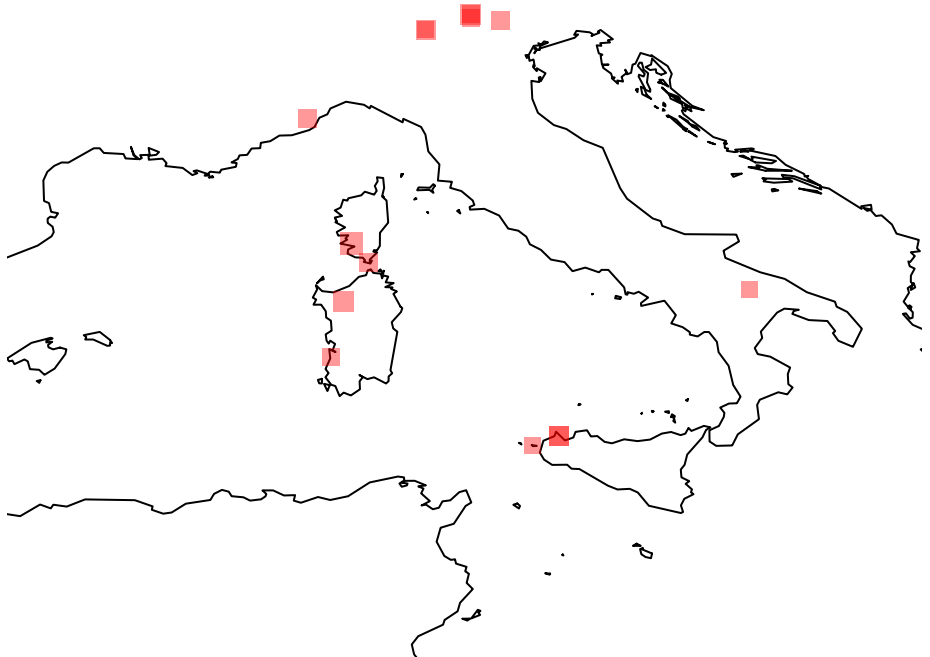

6795 cal. BC

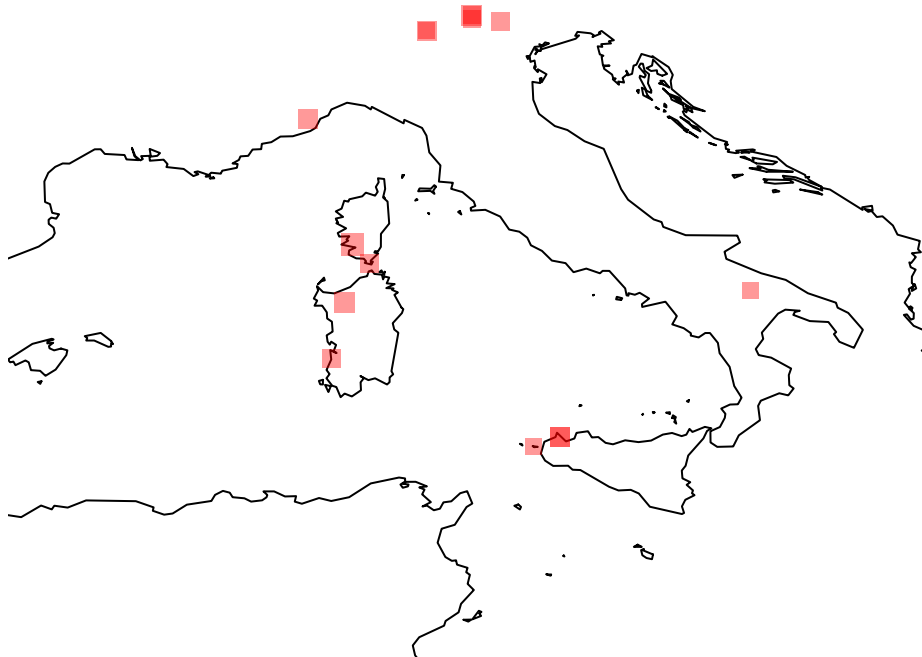

6790 cal. BC

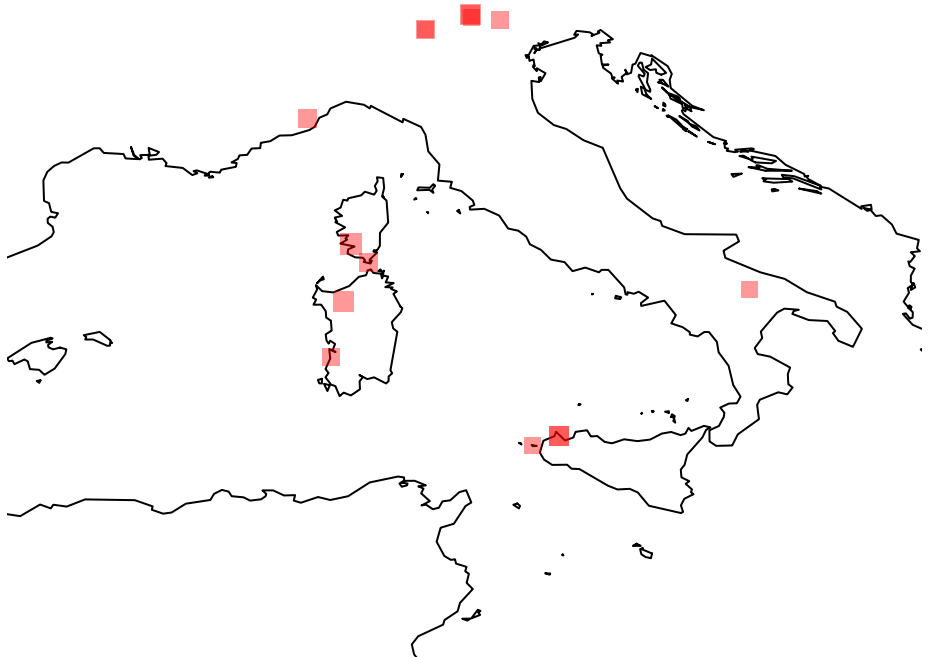

6785 cal. BC

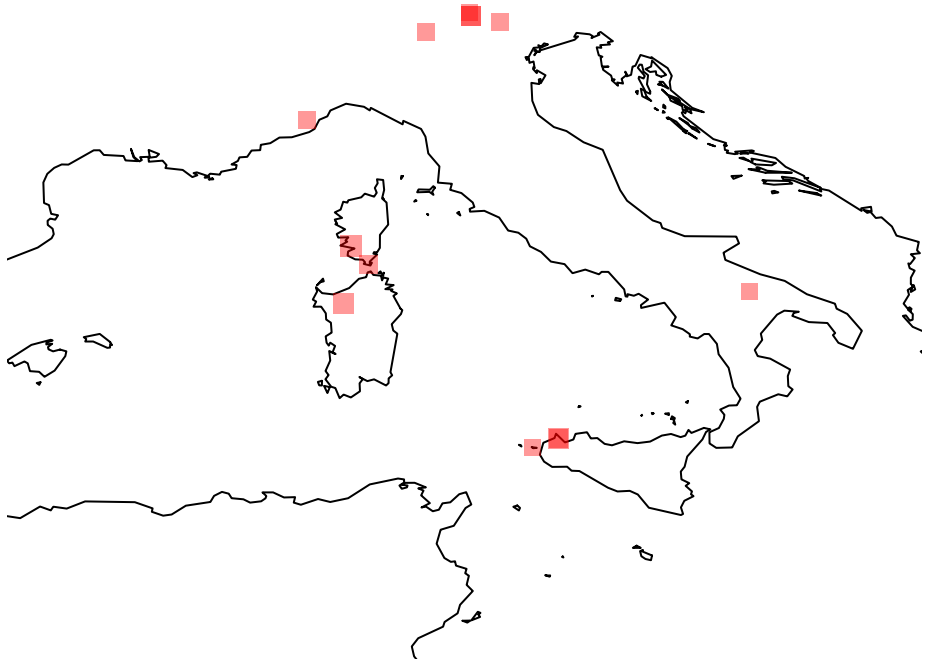

6780 cal. BC

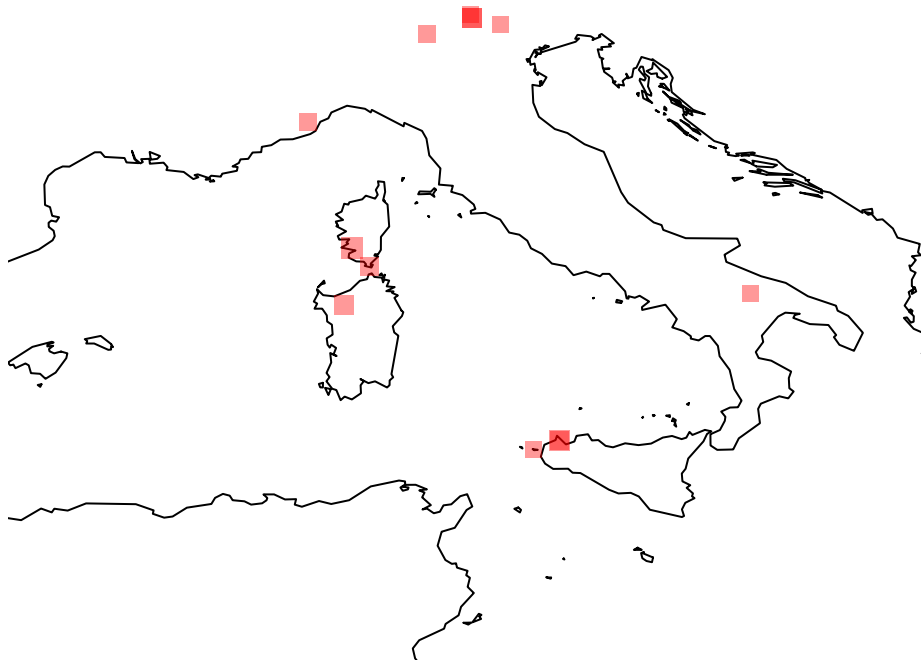

6775 cal. BC

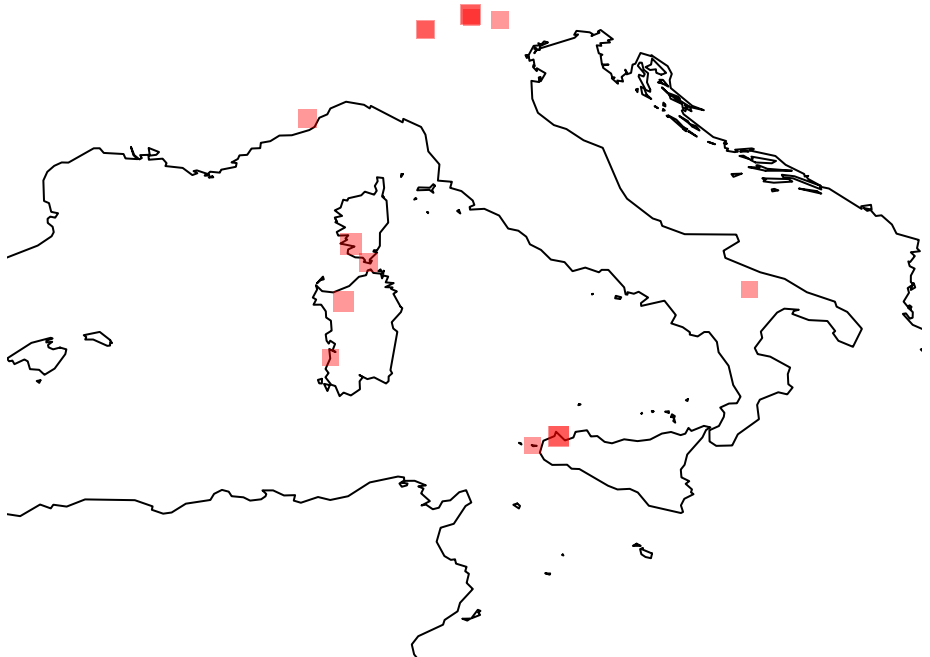

6770 cal. BC

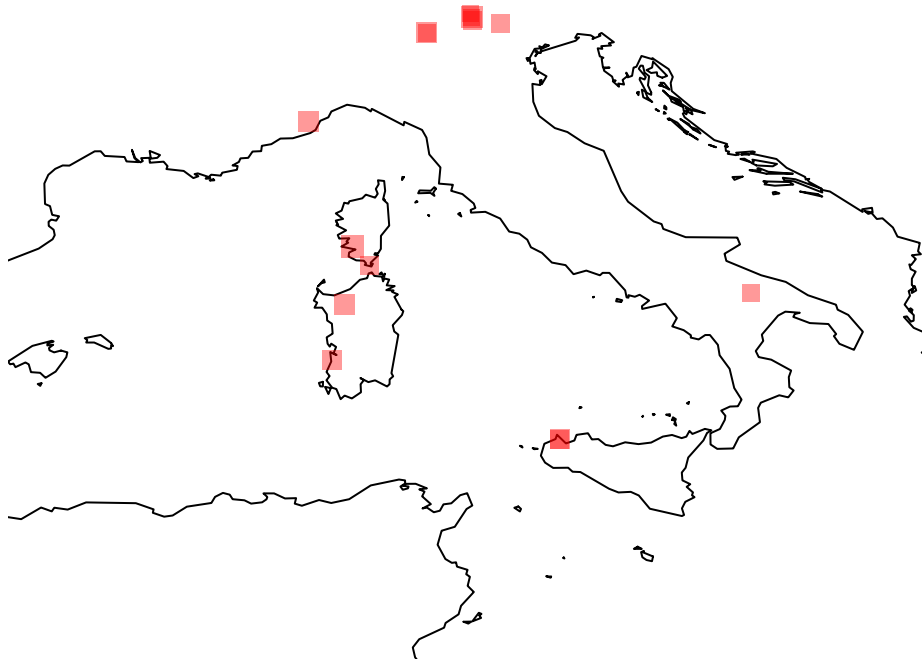



6765 cal. BC

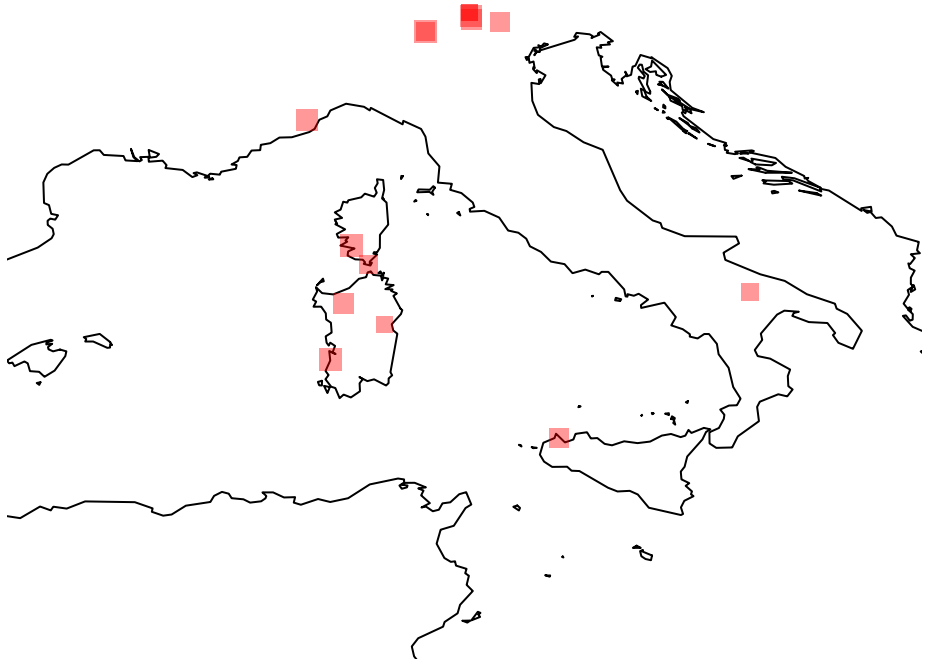

**6760 cal. BC**

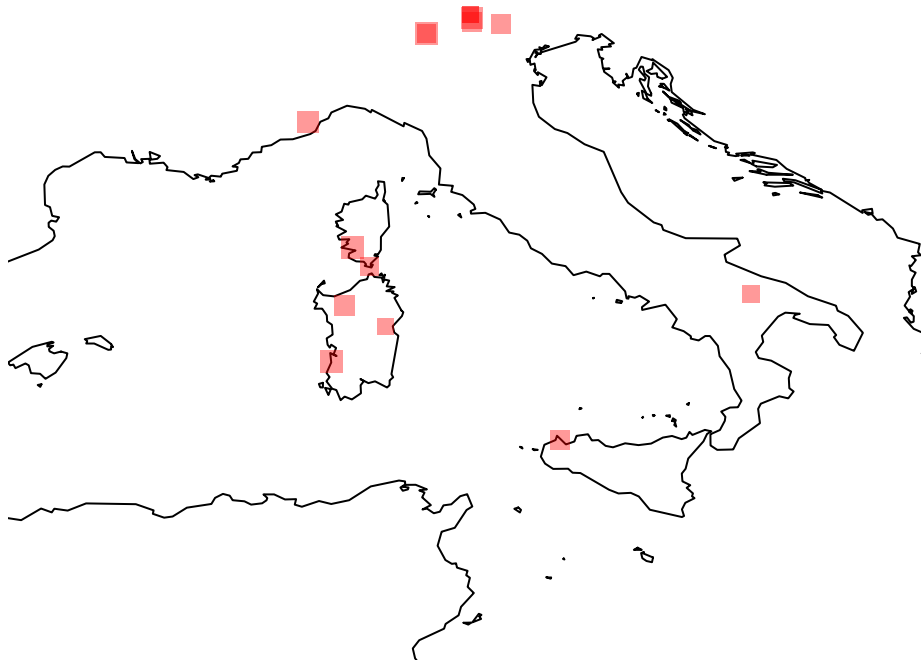

6755 cal. BC

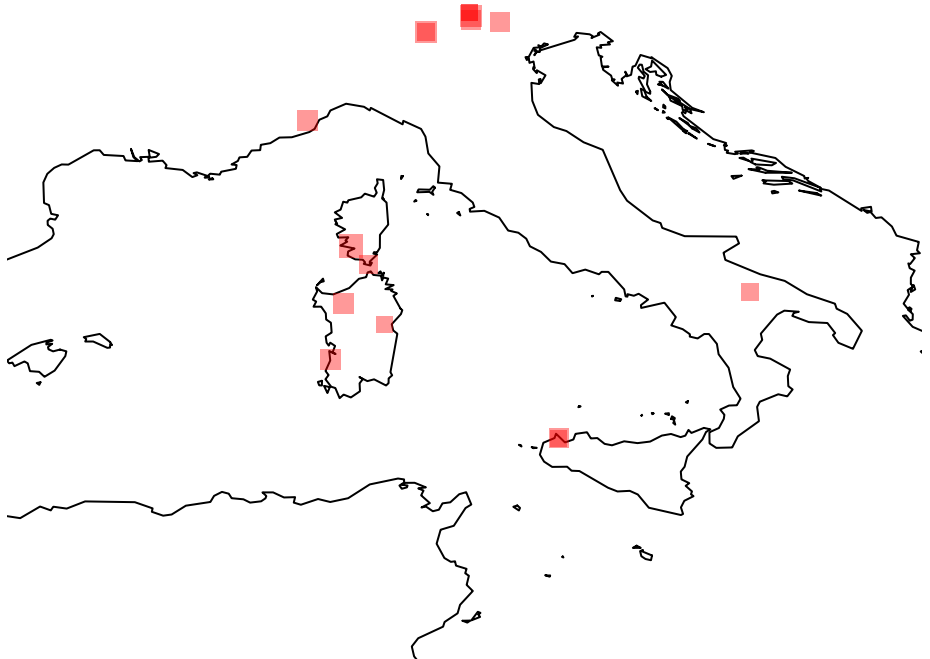

6750 cal. BC

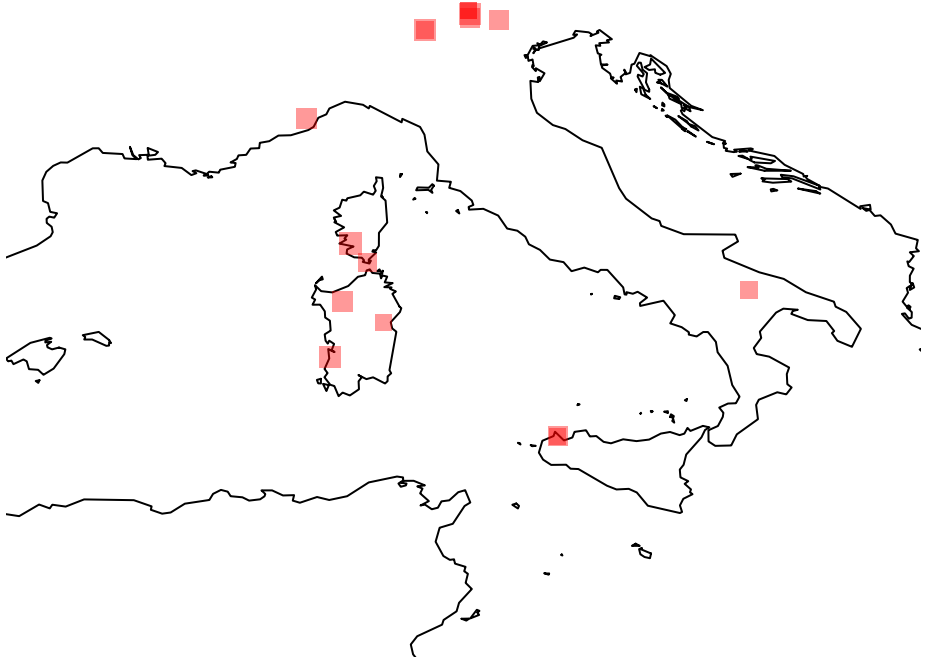

6745 cal. BC

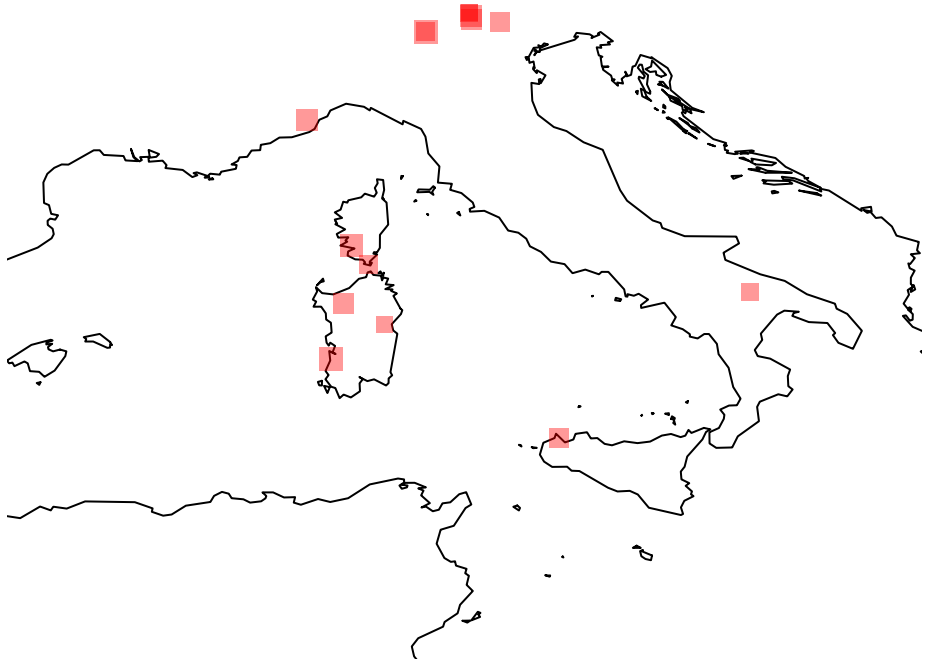

6740 cal. BC

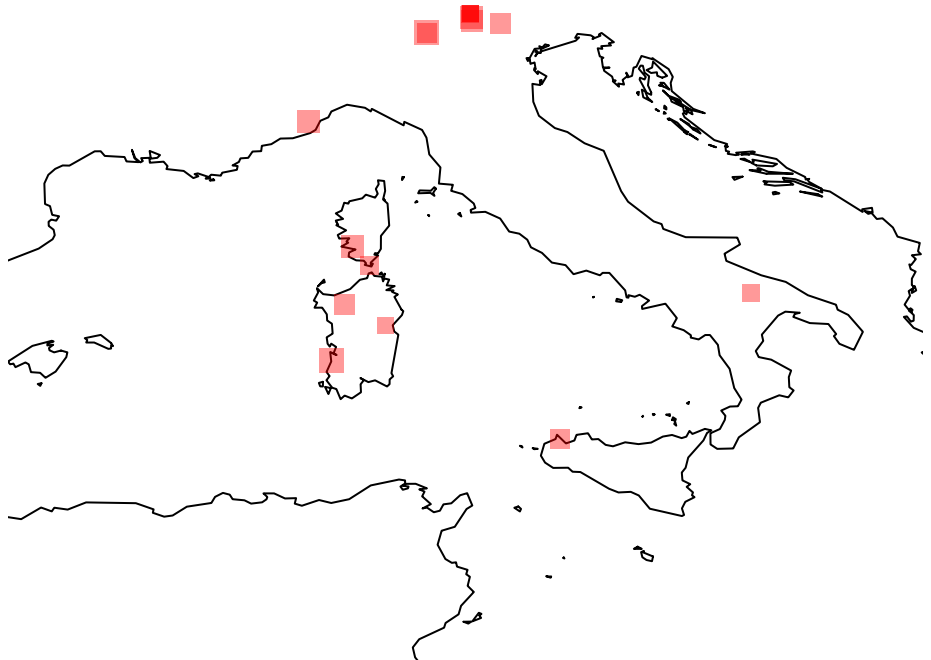

6735 cal. BC

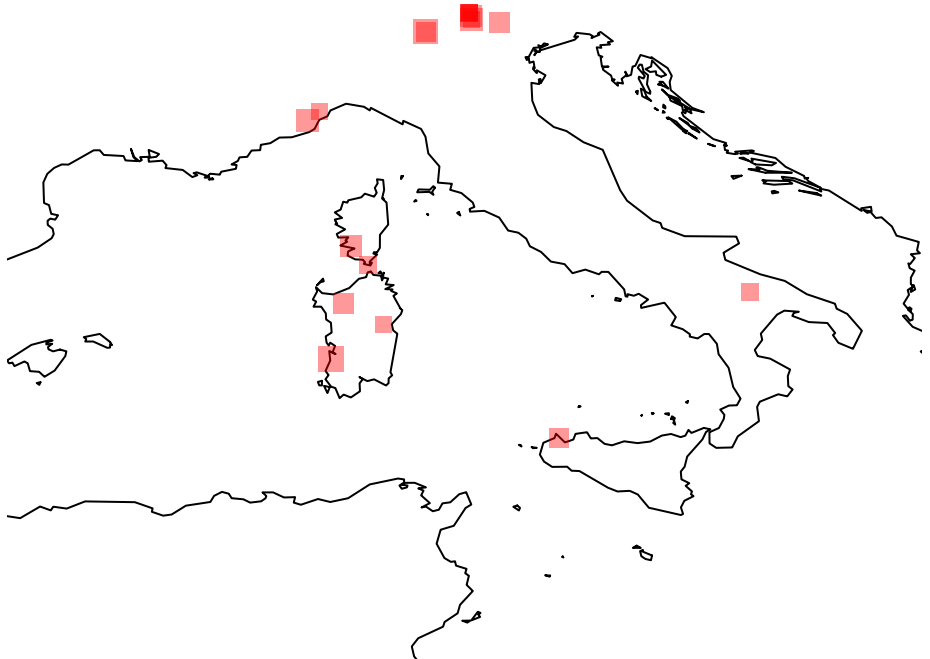

6730 cal. BC

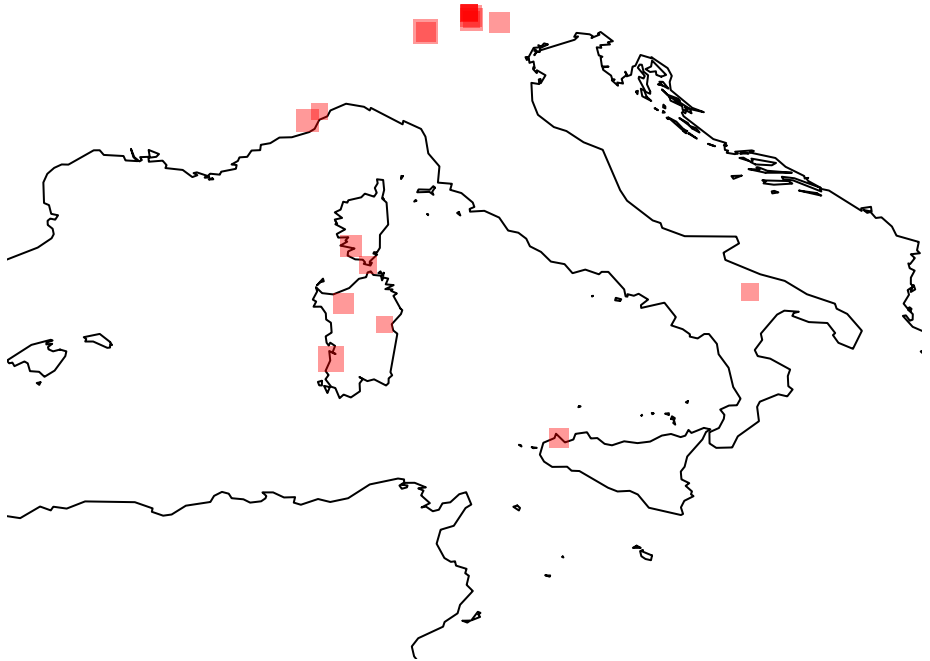



6725 cal. BC

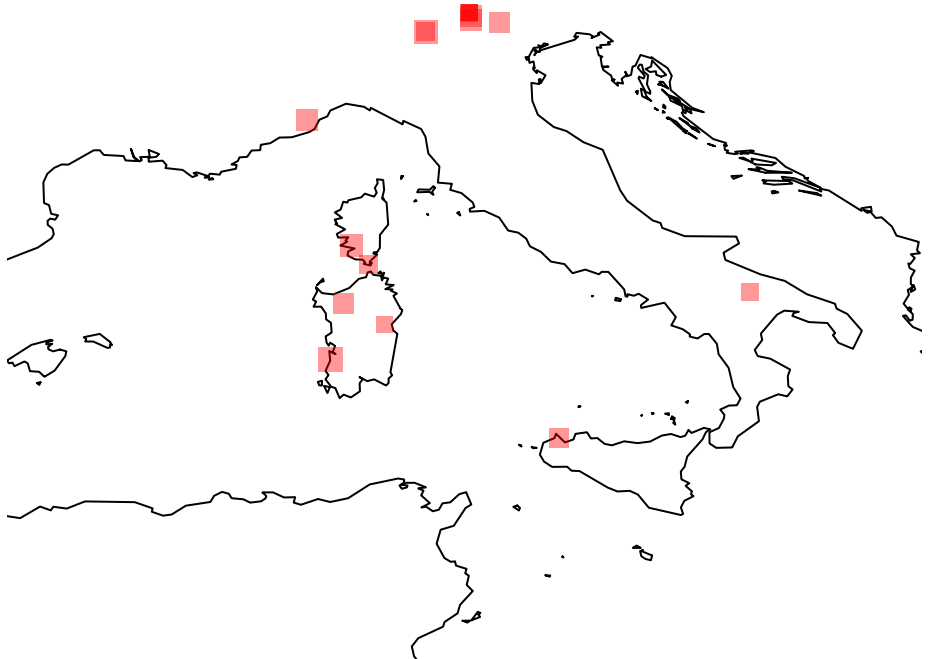

6720 cal. BC

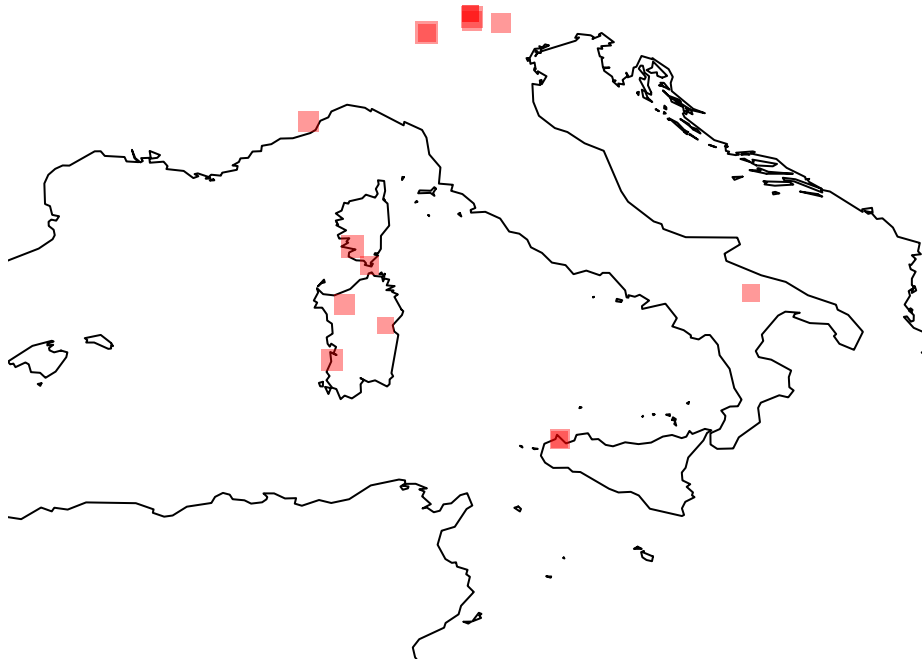



6710 cal. BC

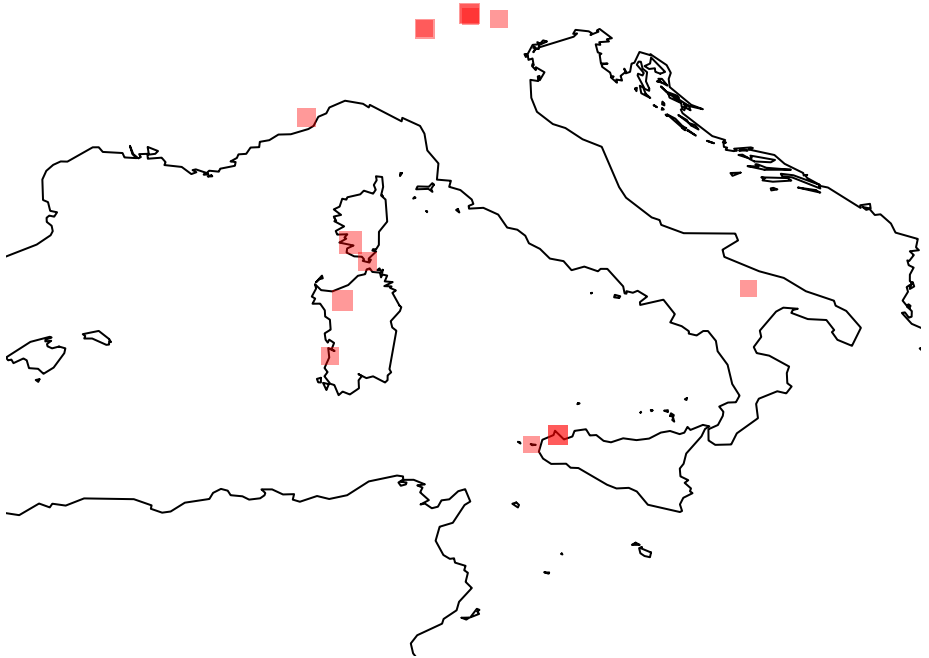

6705 cal. BC

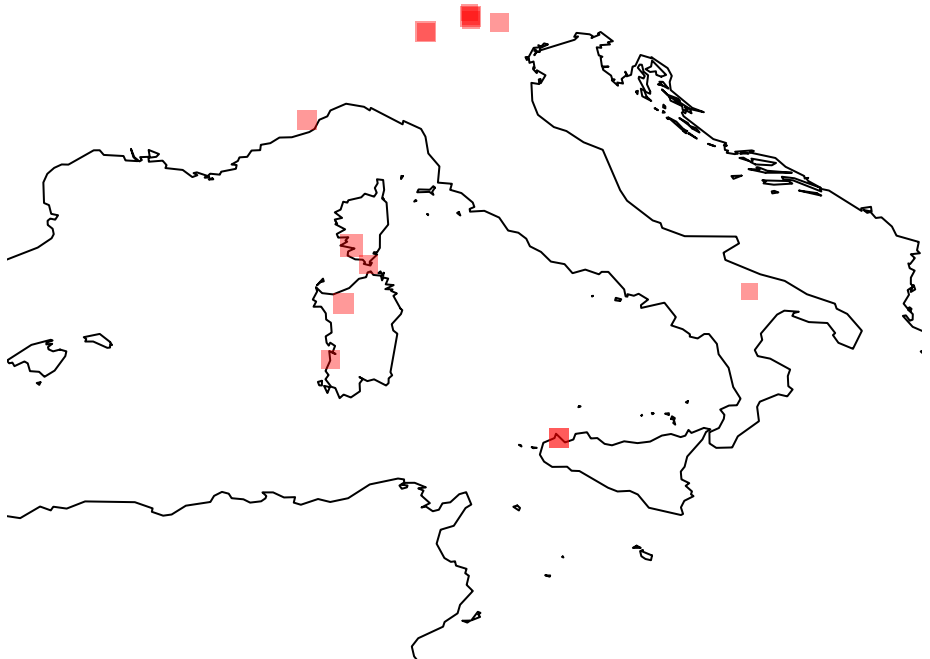

6700 cal. BC

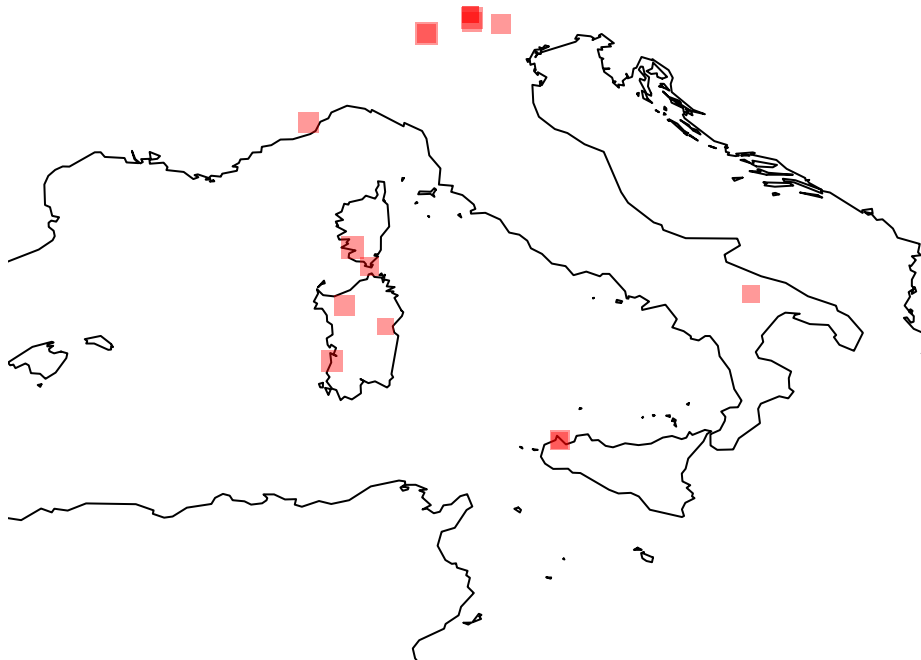

6695 cal. BC

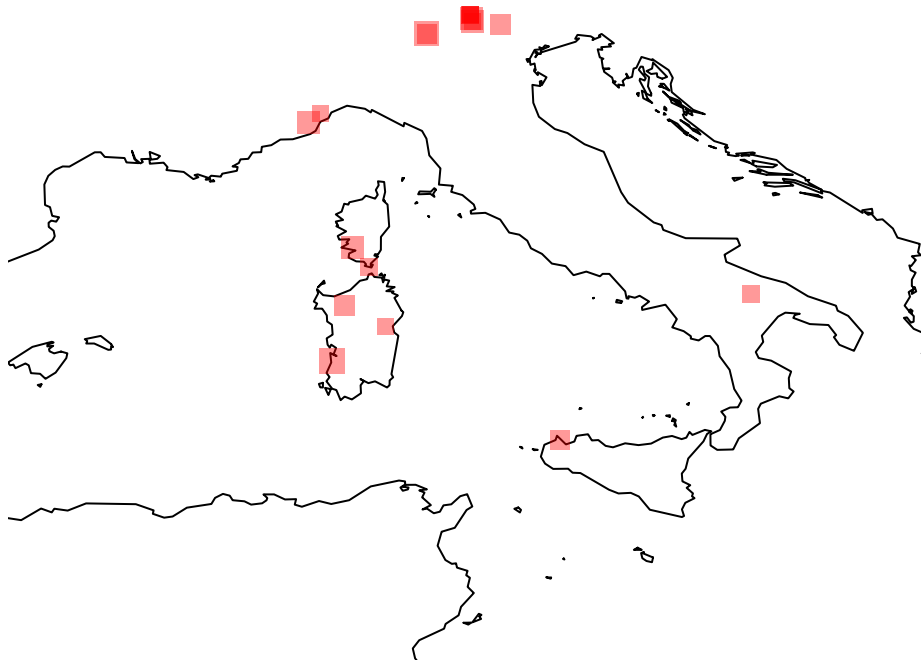

6690 cal. BC

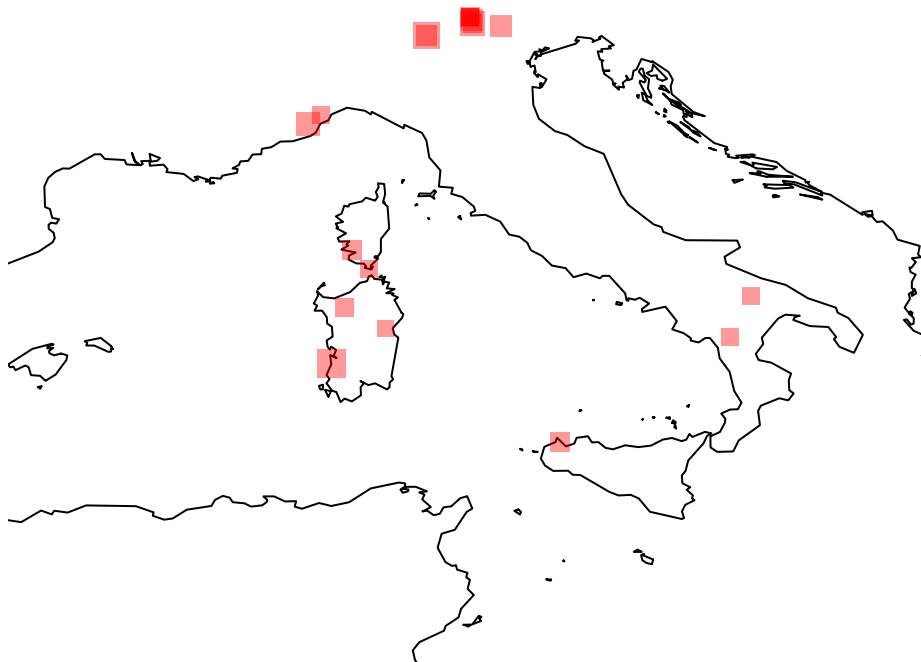



6685 cal. BC

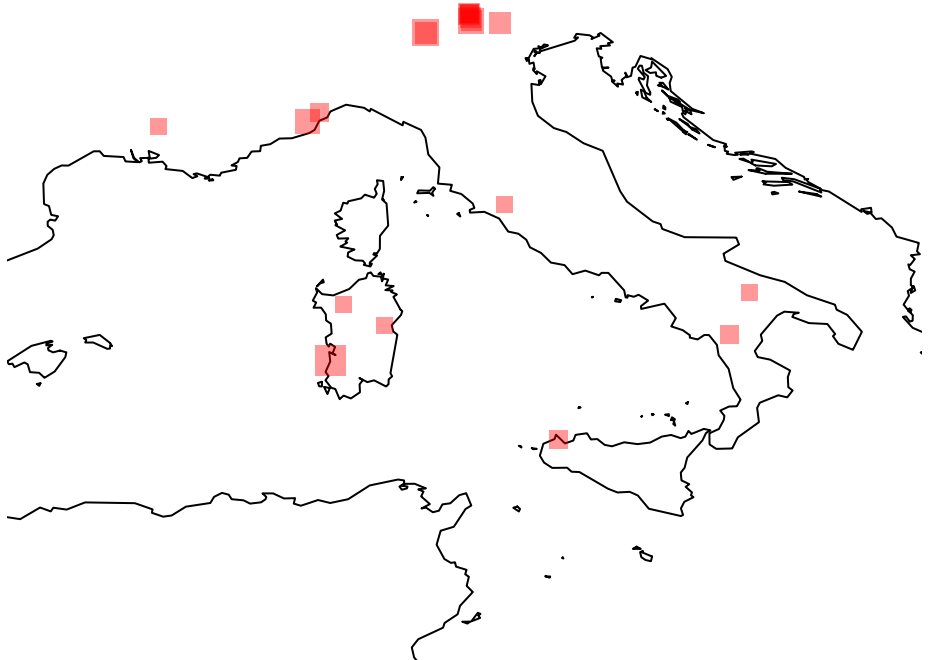

6680 cal. BC

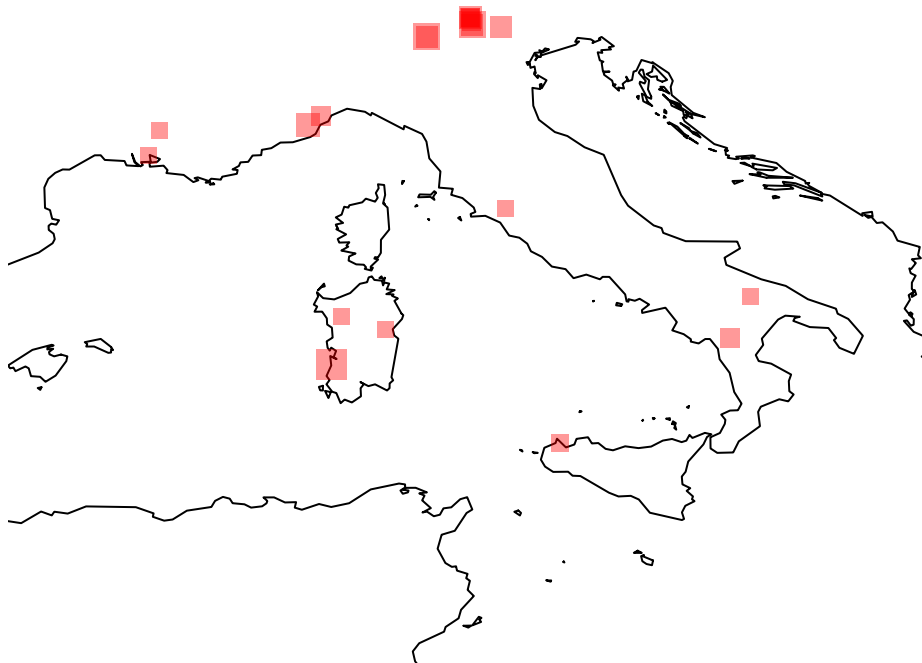

**6675 cal. BC**

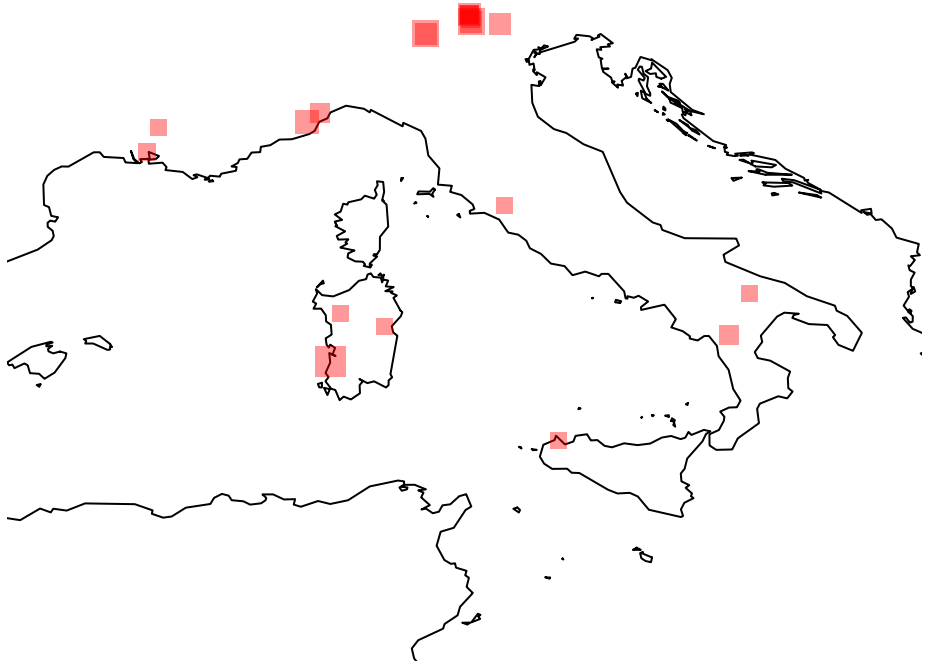

6670 cal. BC

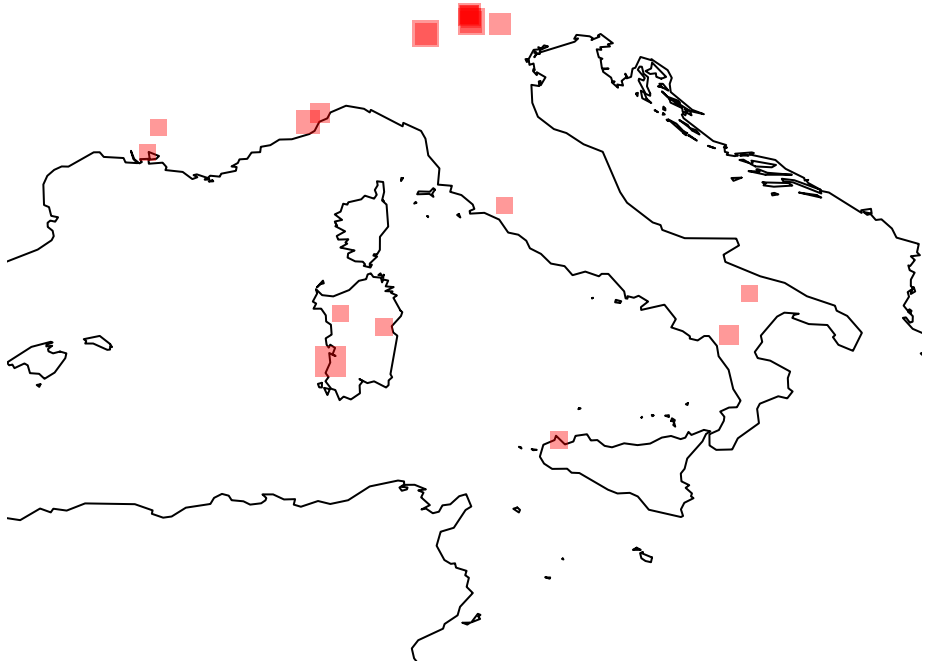

6665 cal. BC

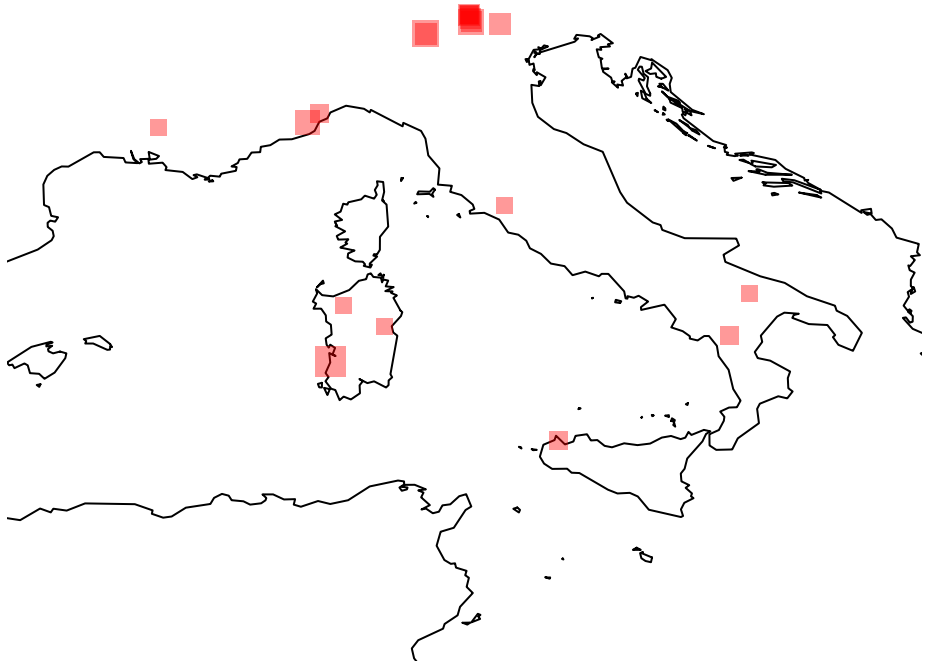

6660 cal. BC

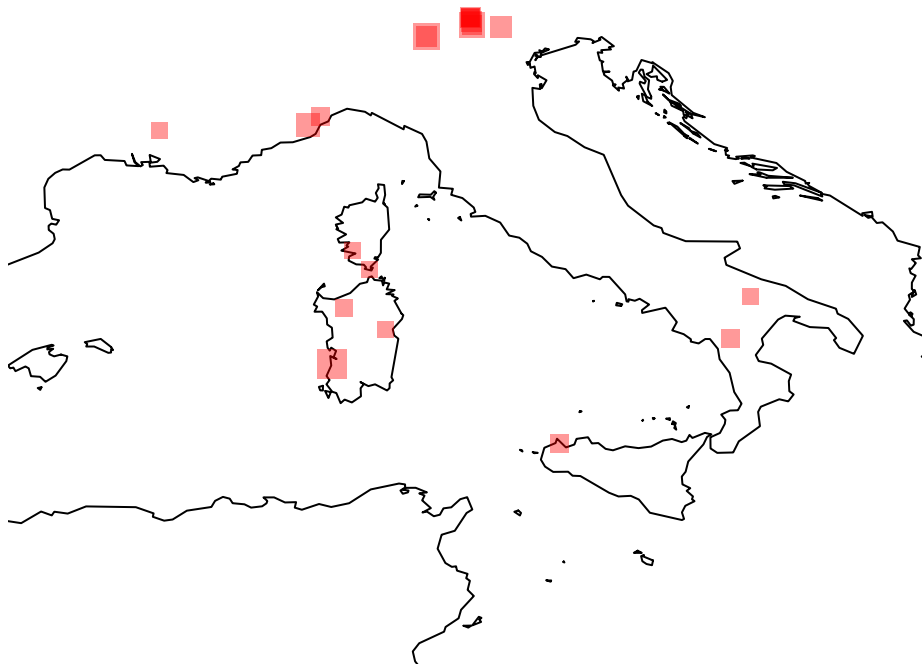

6655 cal. BC

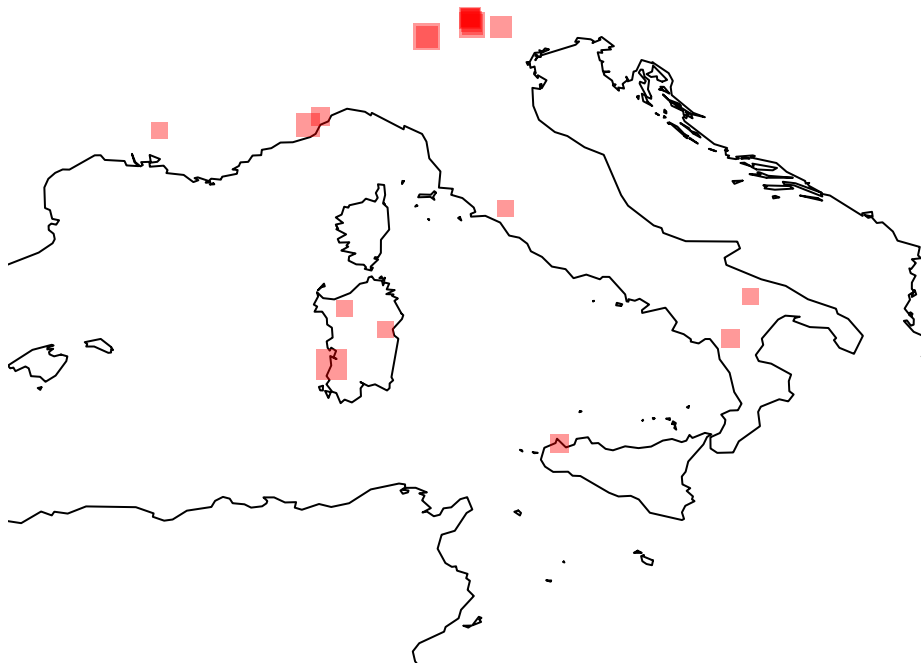

6650 cal. BC

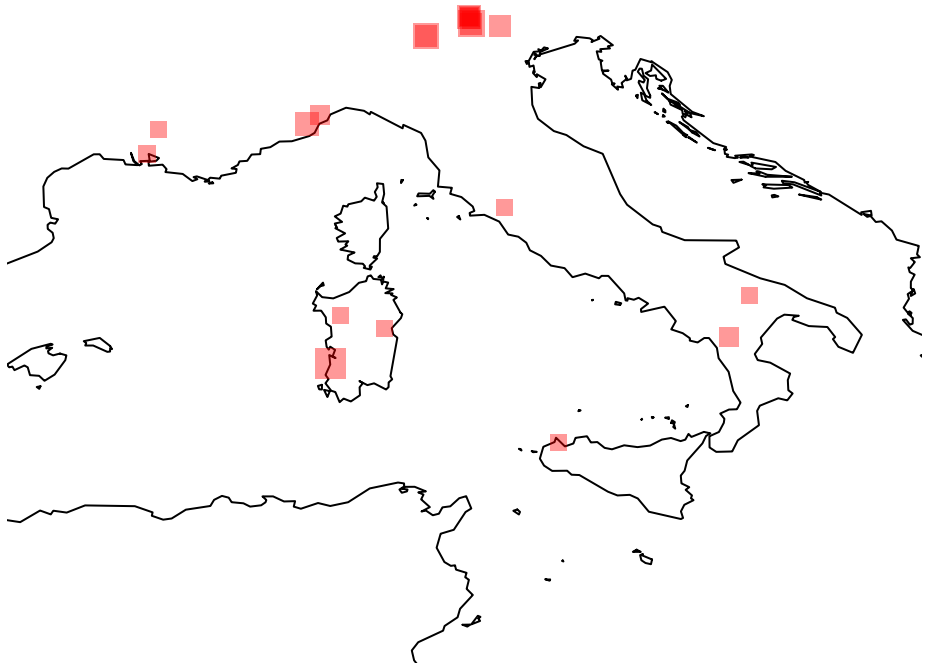



6645 cal. BC

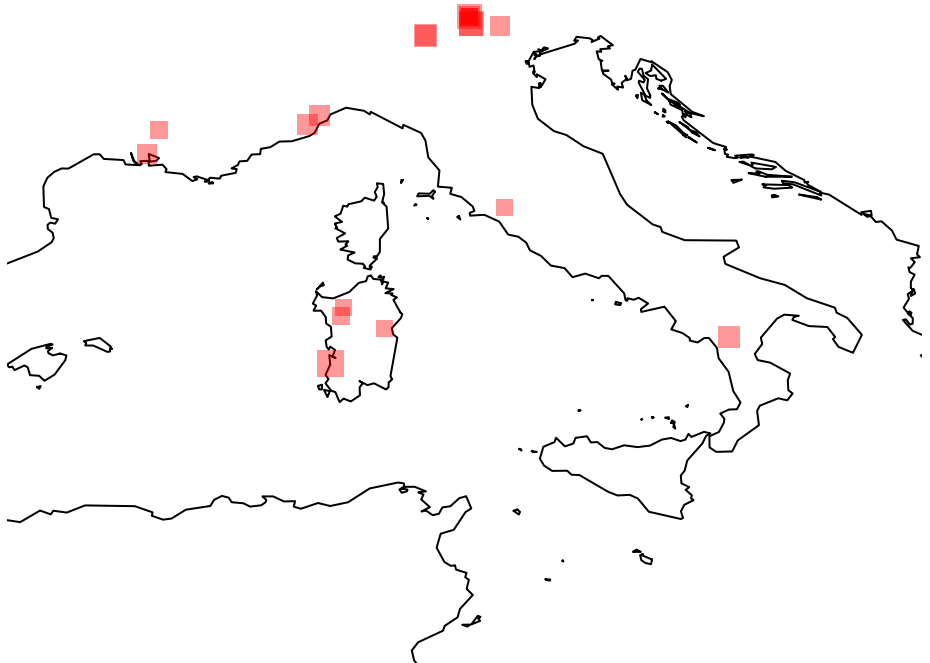

6640 cal. BC

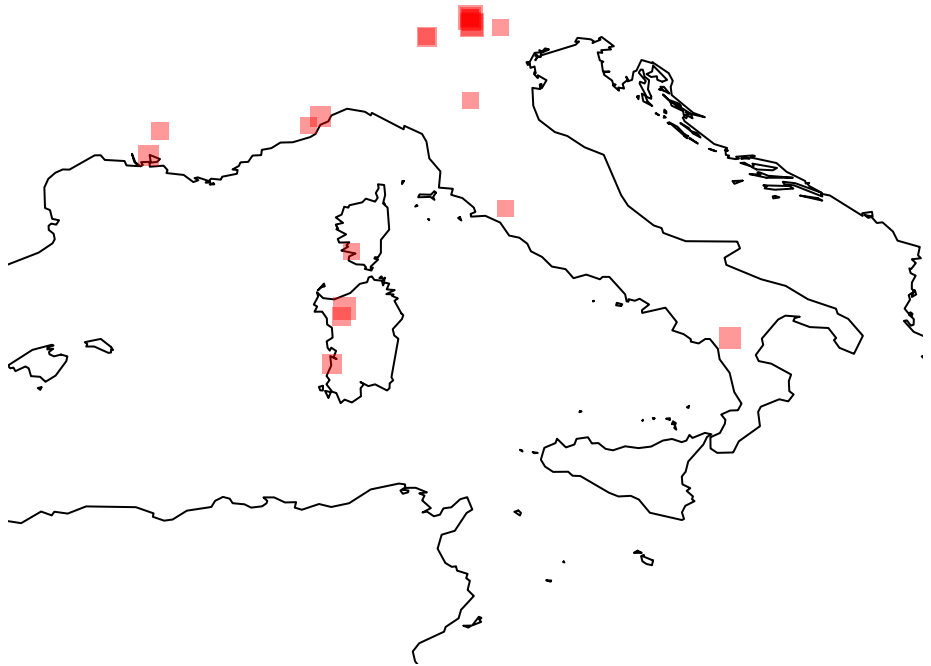

6635 cal. BC

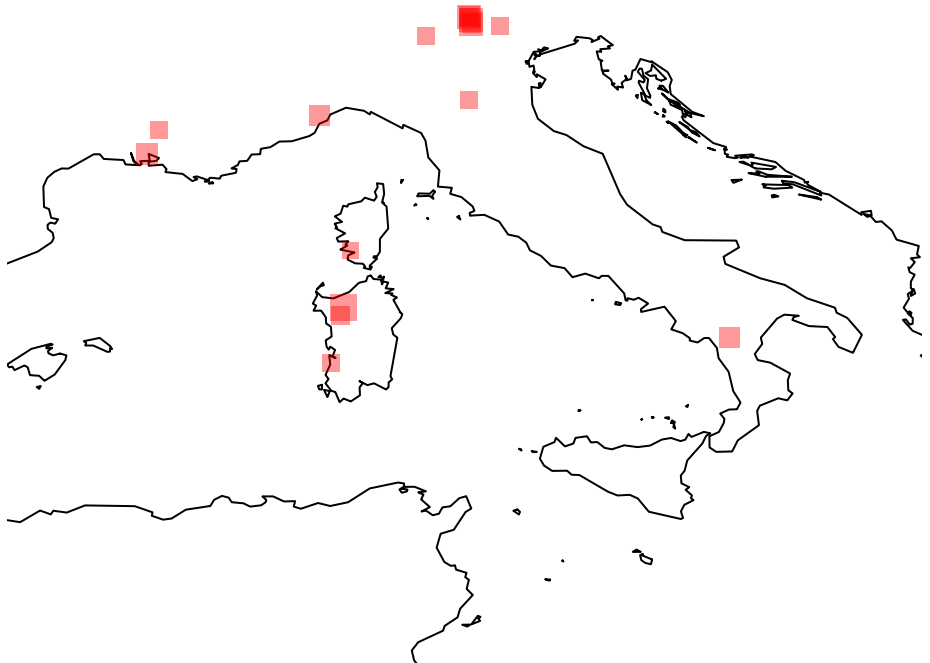

6630 cal. BC

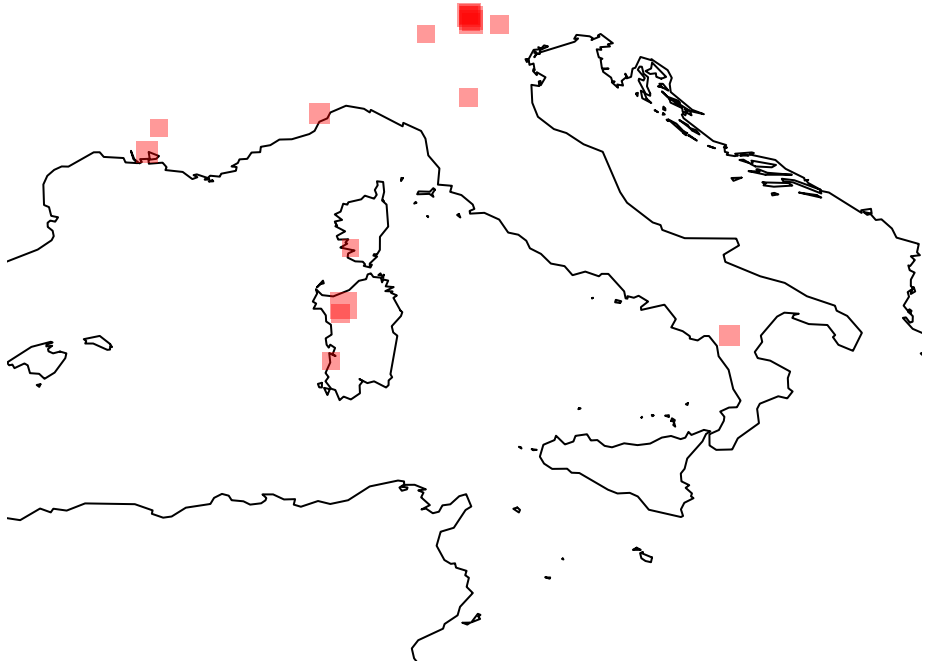



6620 cal. BC

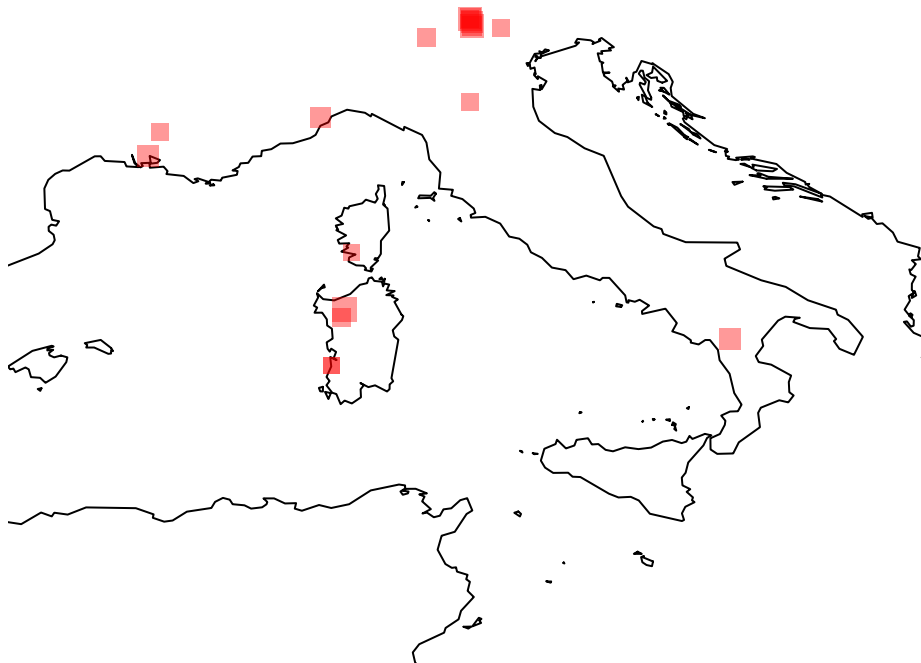

6615 cal. BC

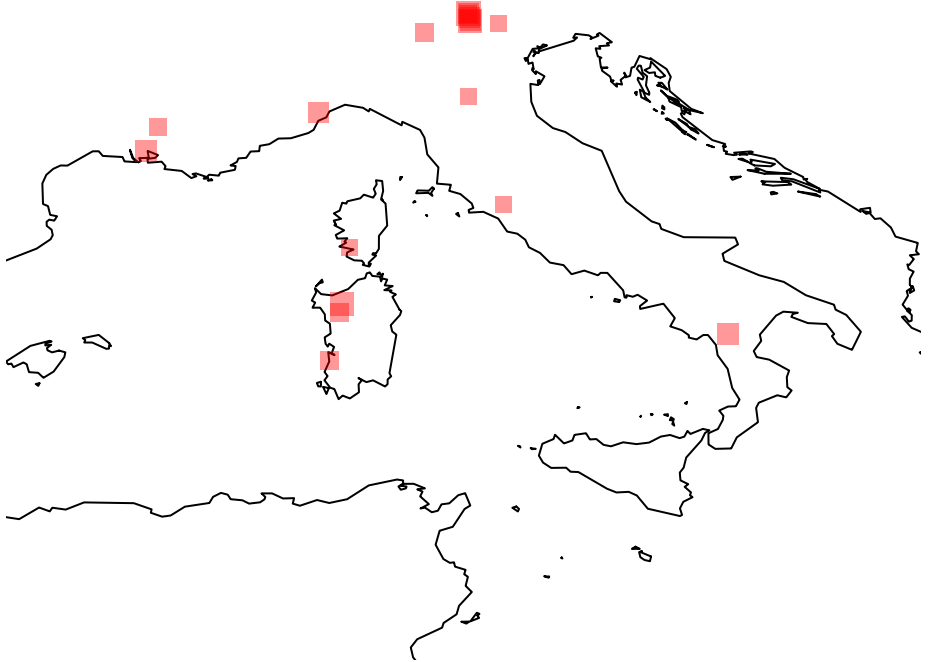

6610 cal. BC

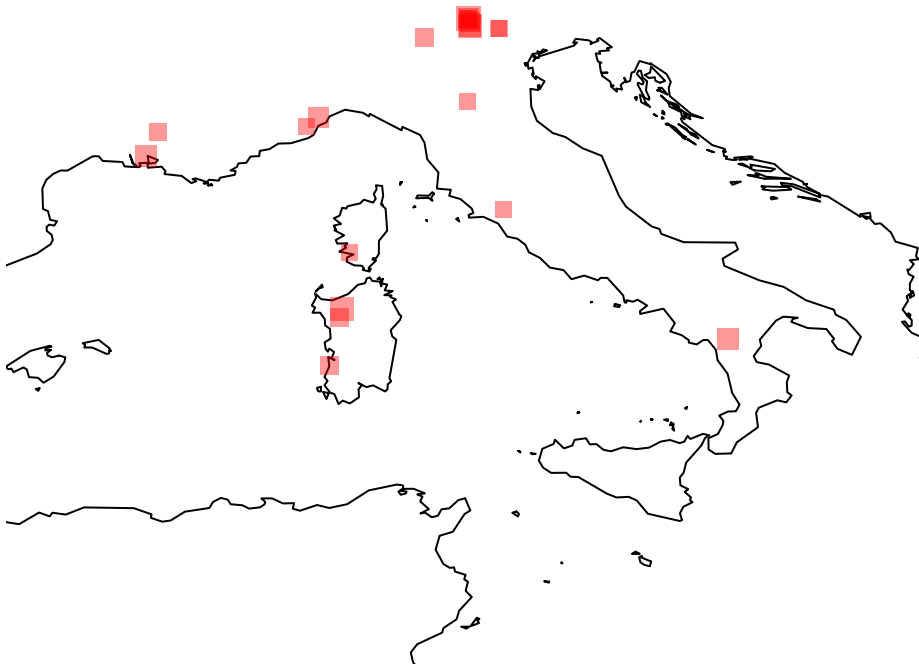



6605 cal. BC

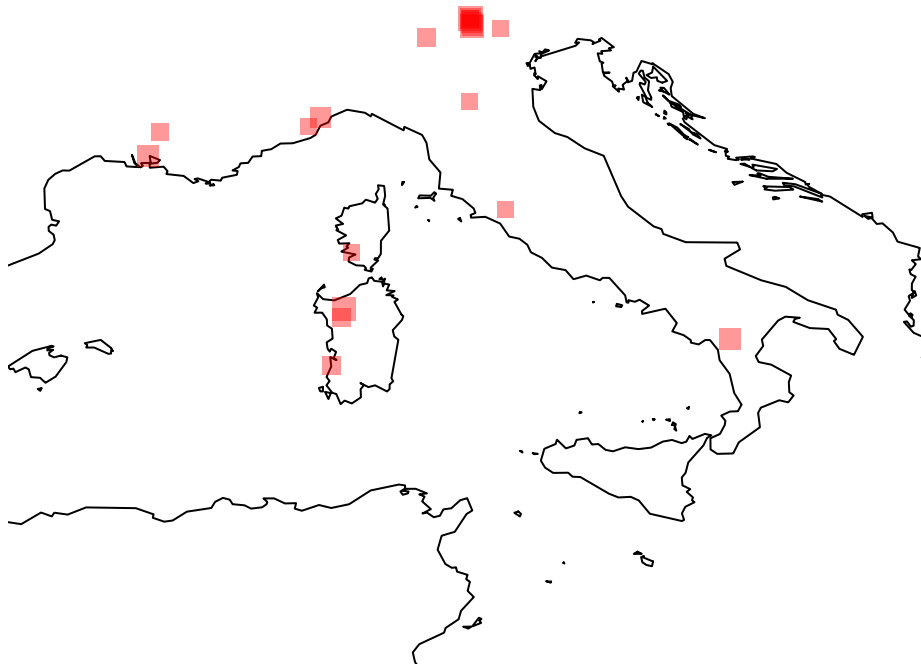

6600 cal. BC

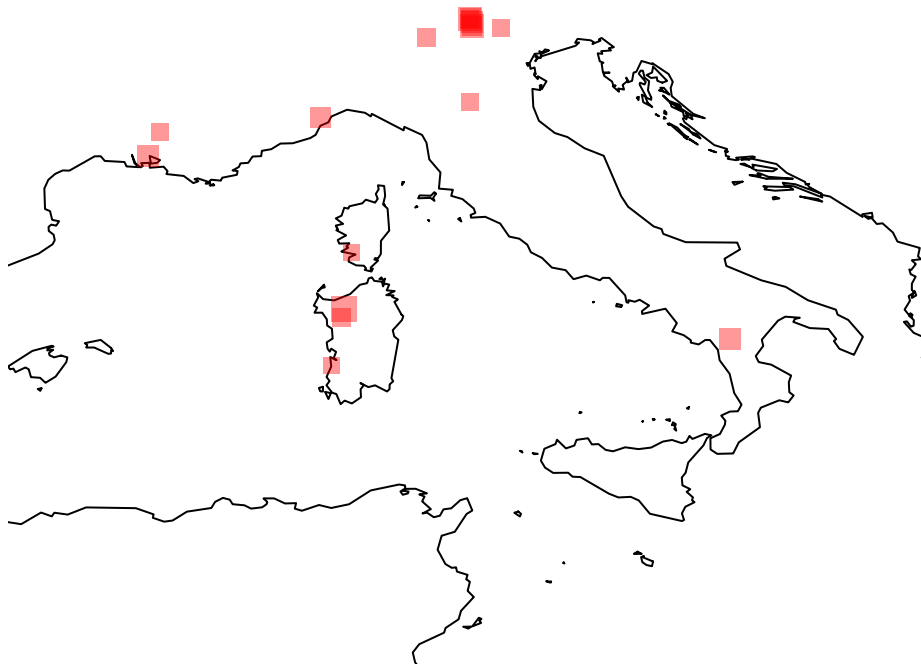

6595 cal. BC

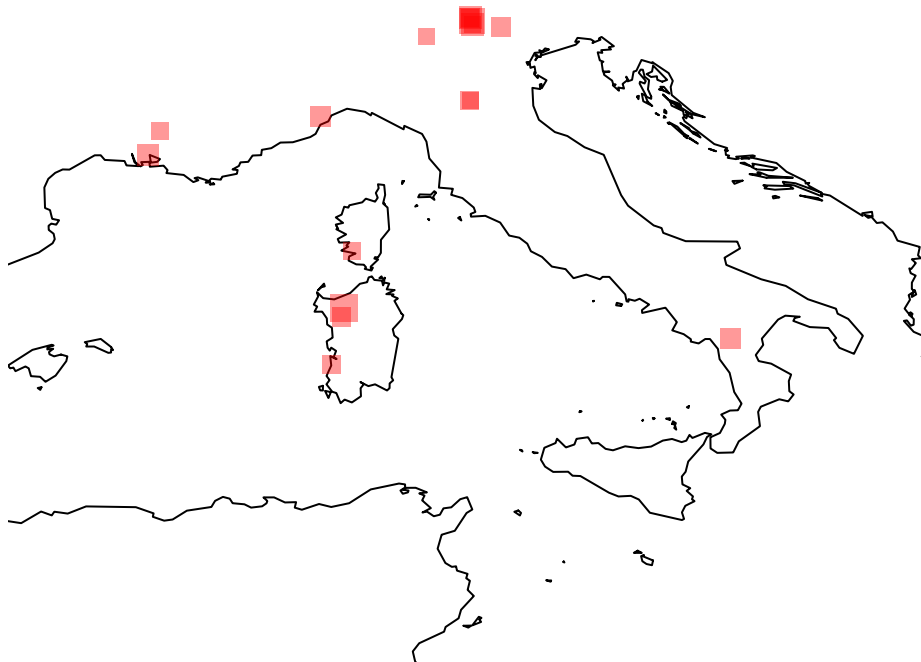





**6580 cal. BC**

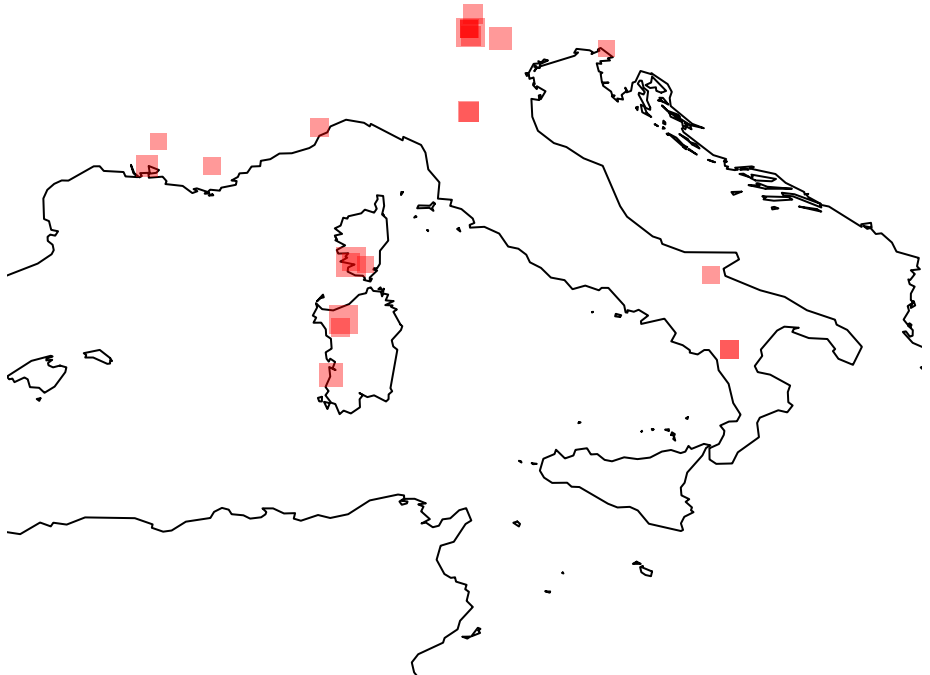

**6575 cal. BC**

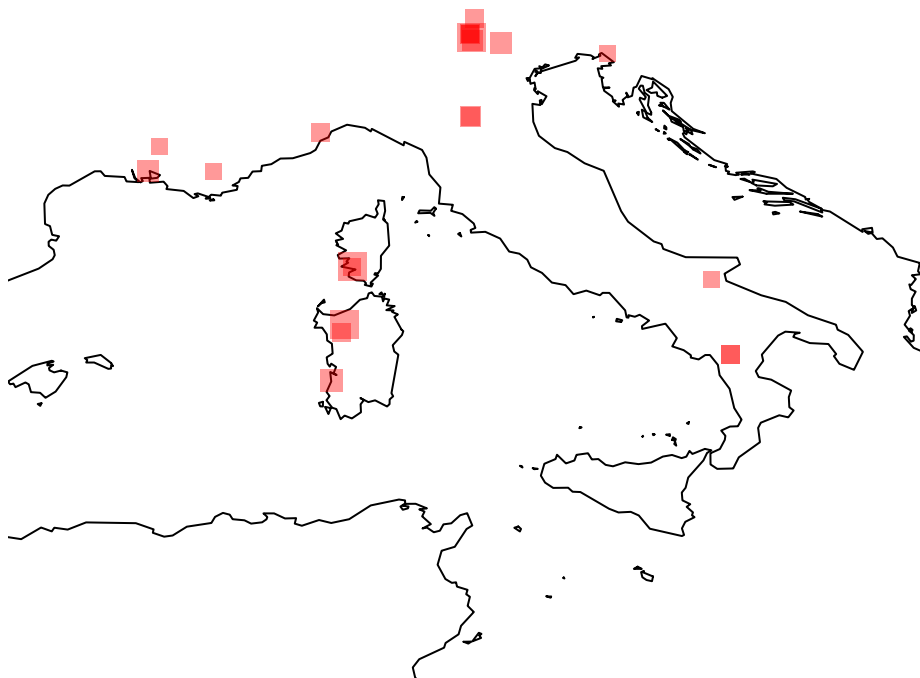

**6570 cal. BC**

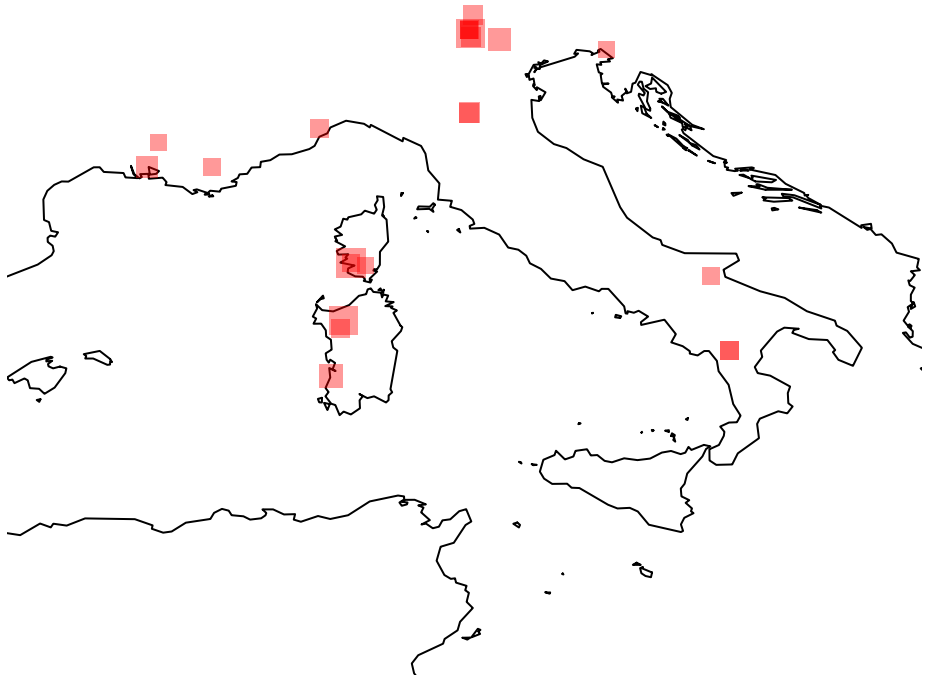



6565 cal. BC

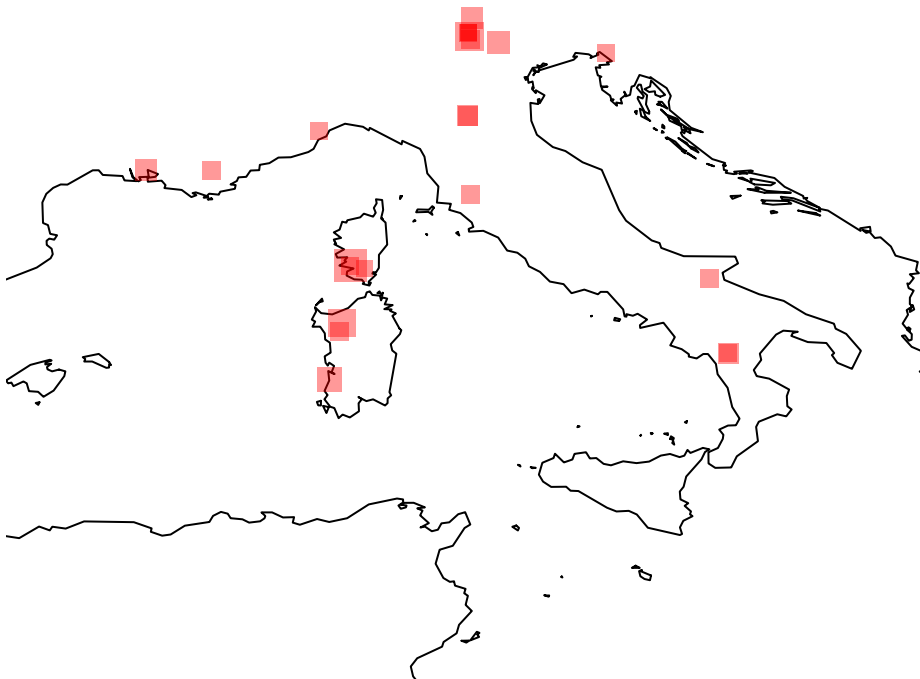

6560 cal. BC

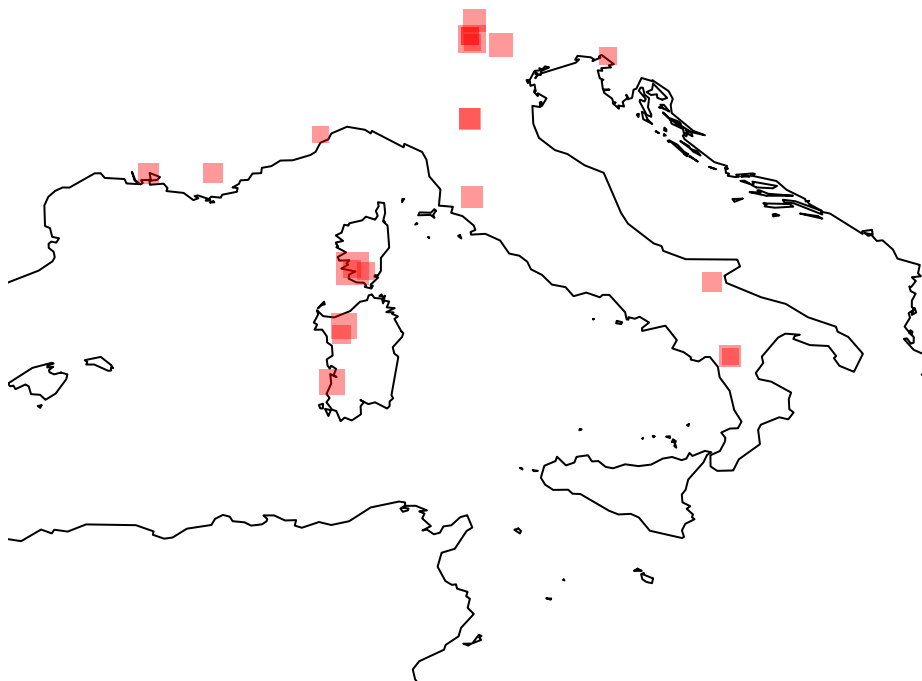

6555 cal. BC

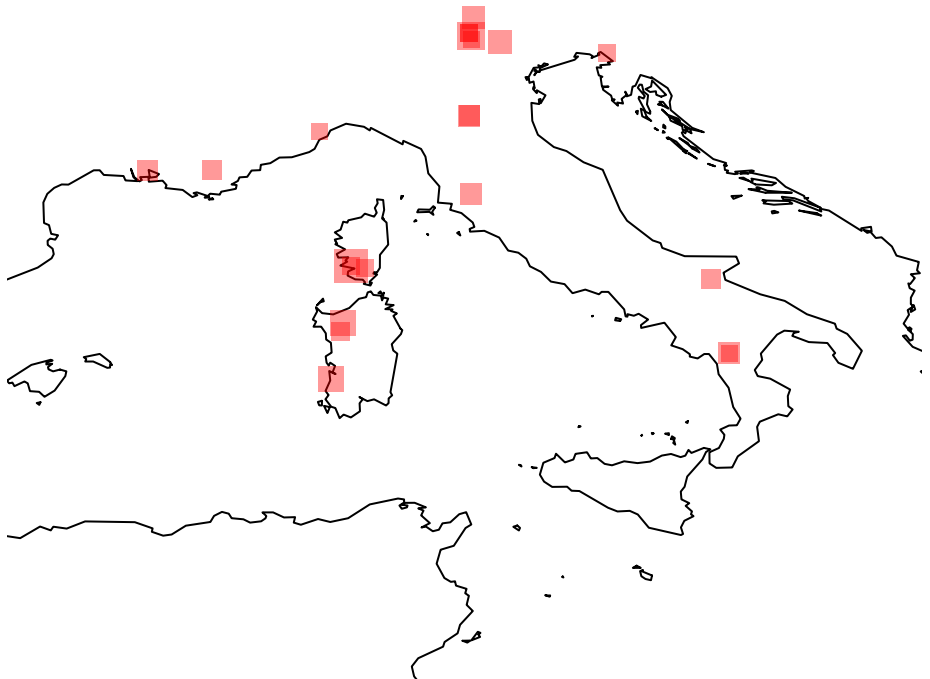

6550 cal. BC

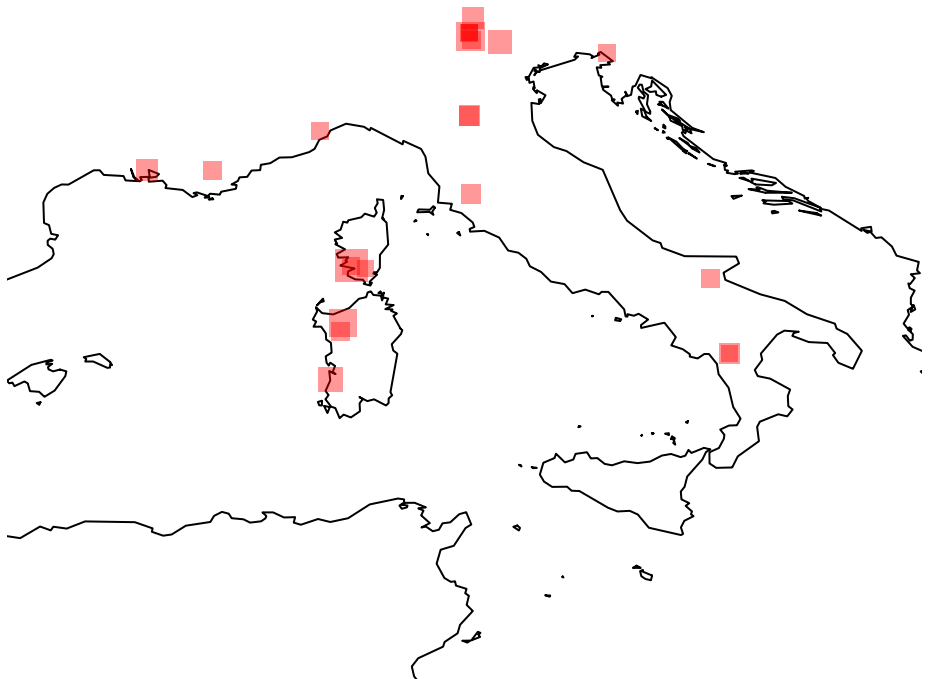

6545 cal. BC

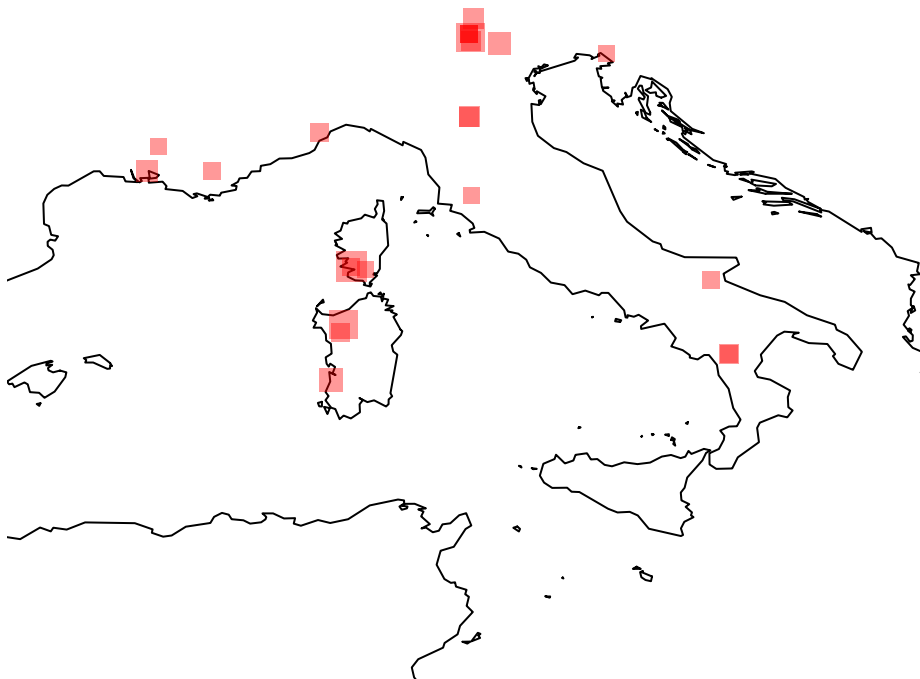

**6540 cal. BC**

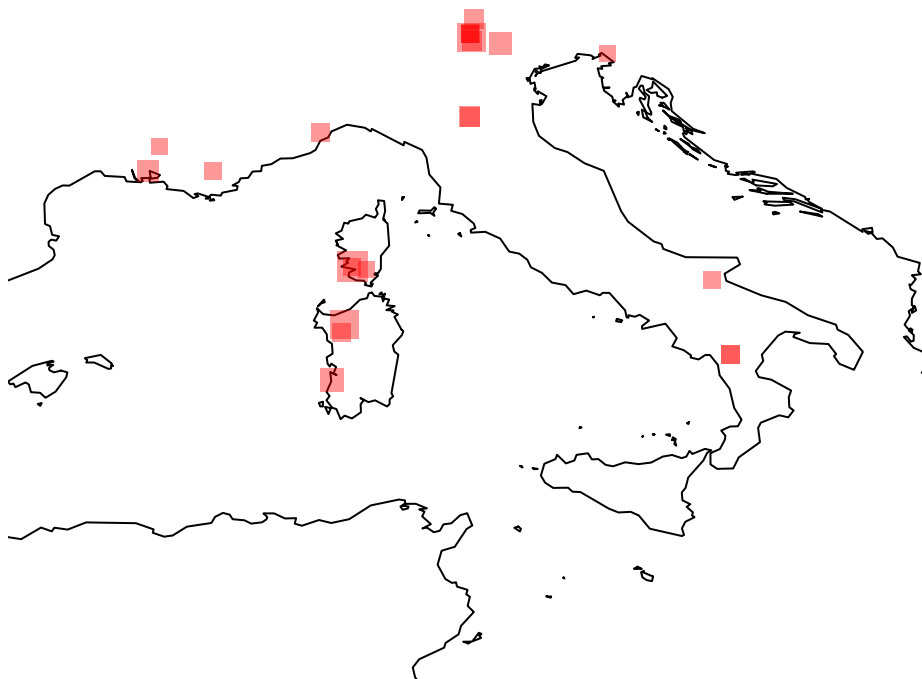

6535 cal. BC

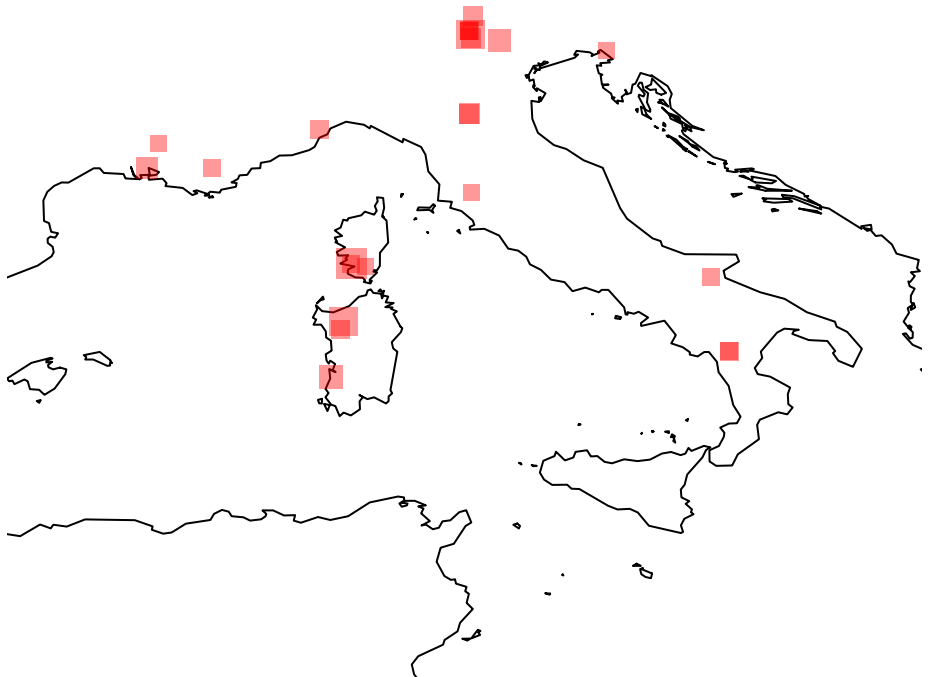

6530 cal. BC

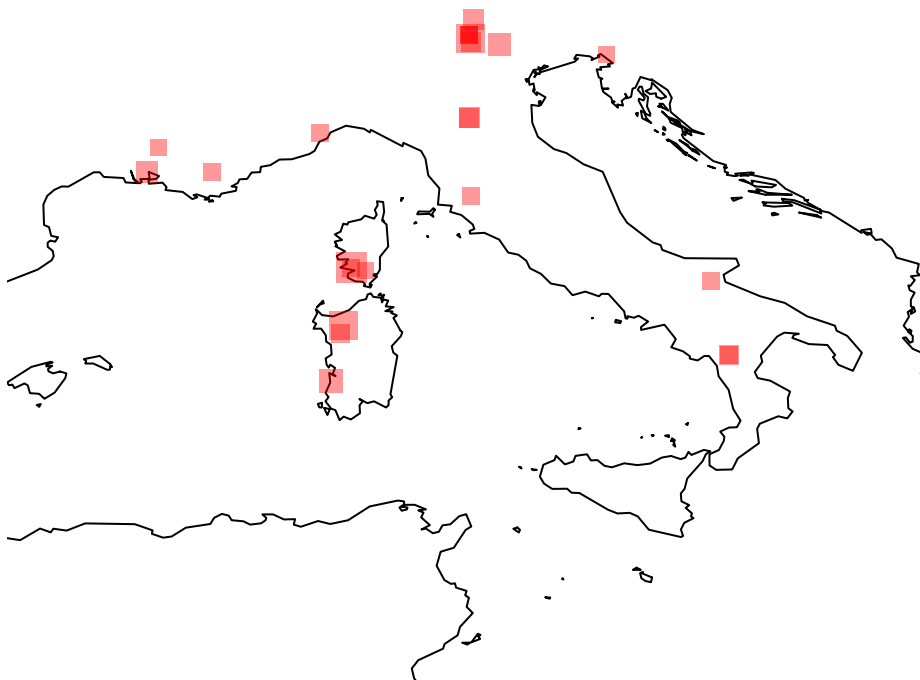



6525 cal. BC

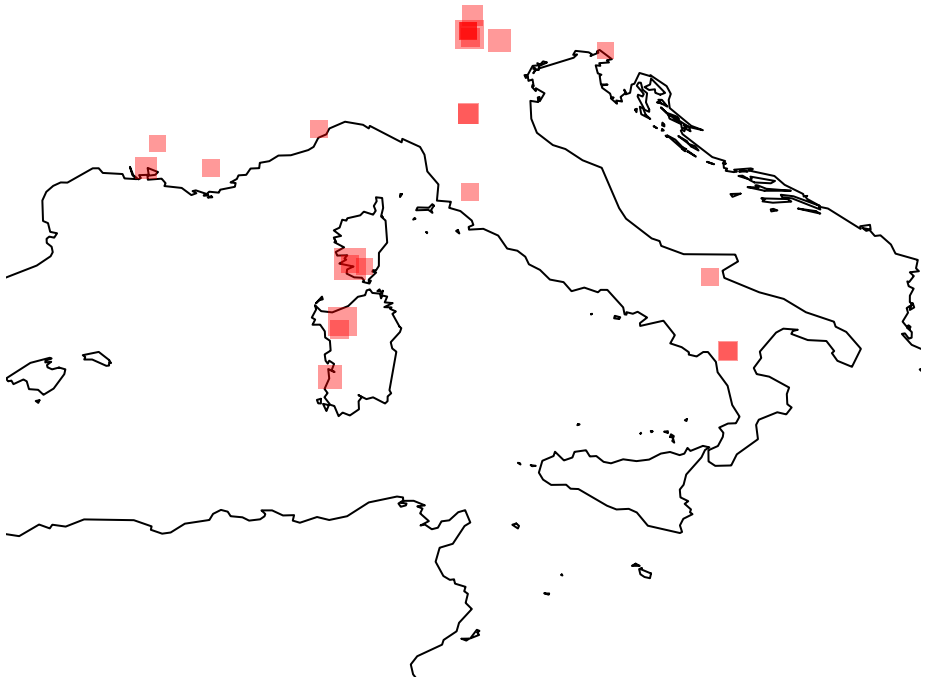

6520 cal. BC

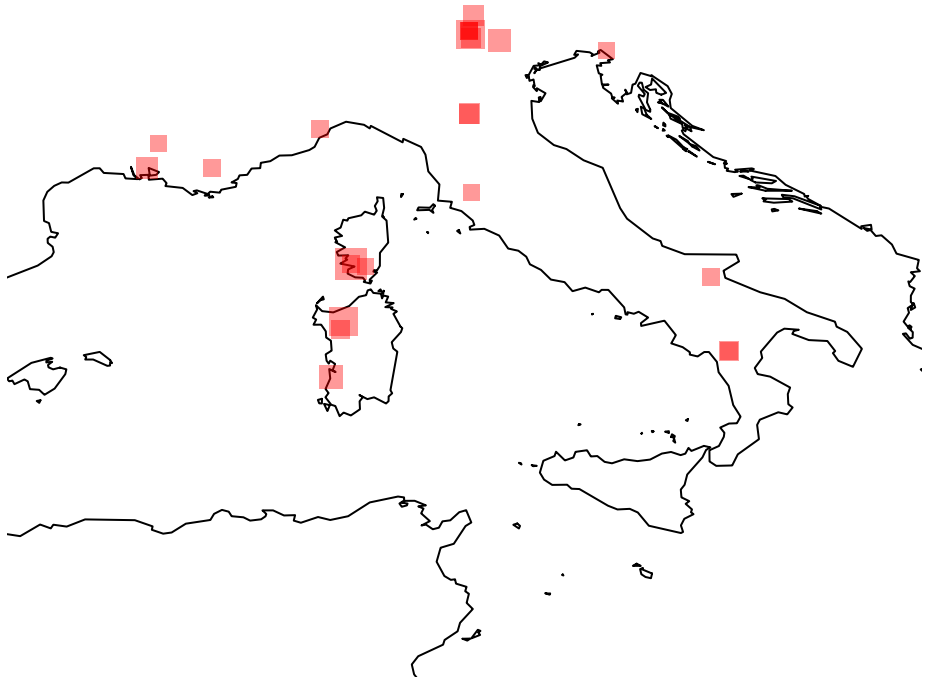

6515 cal. BC

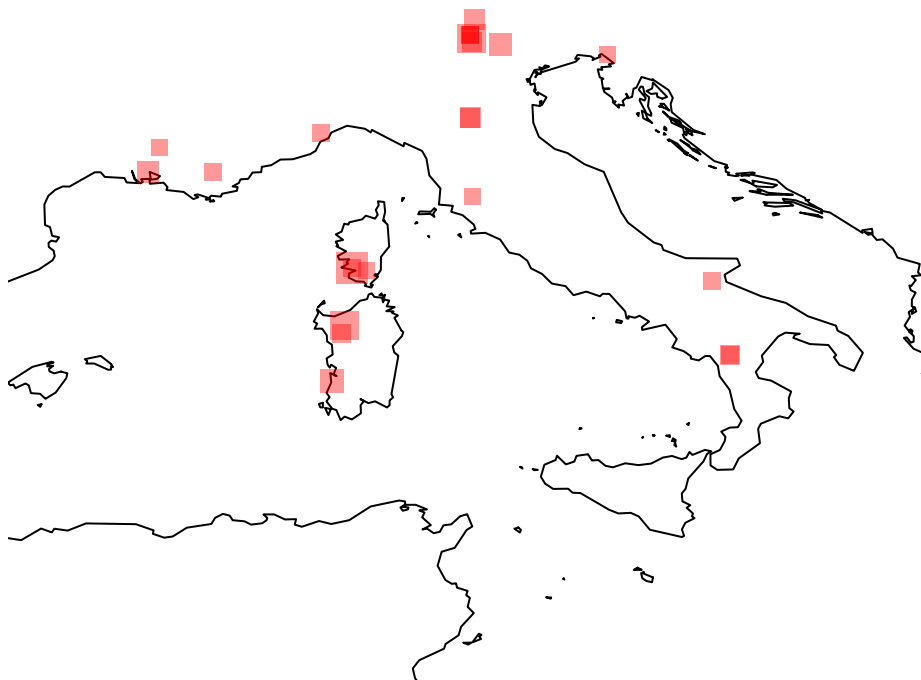

6510 cal. BC

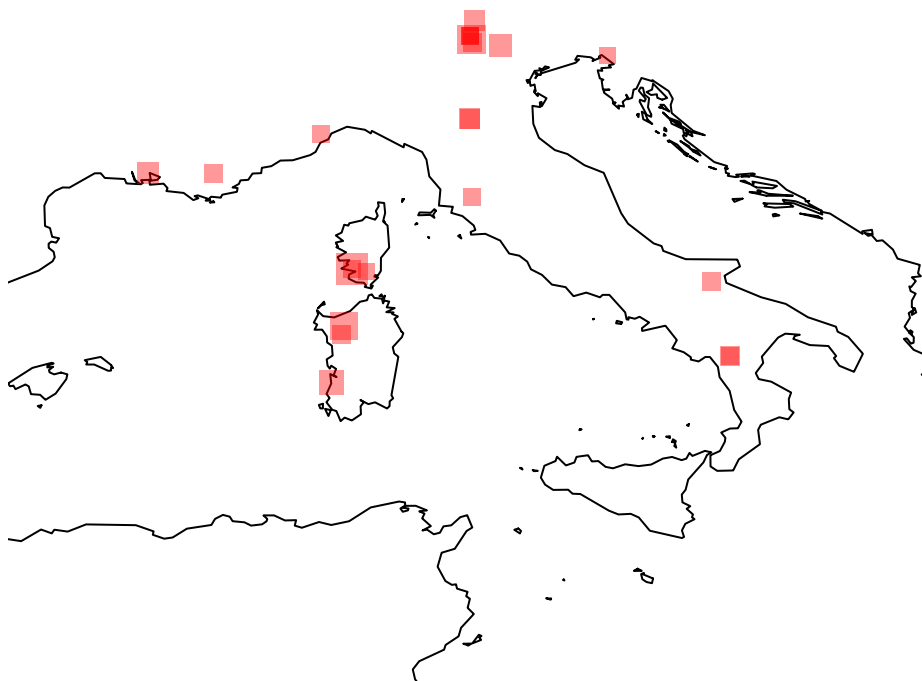



6500 cal. BC

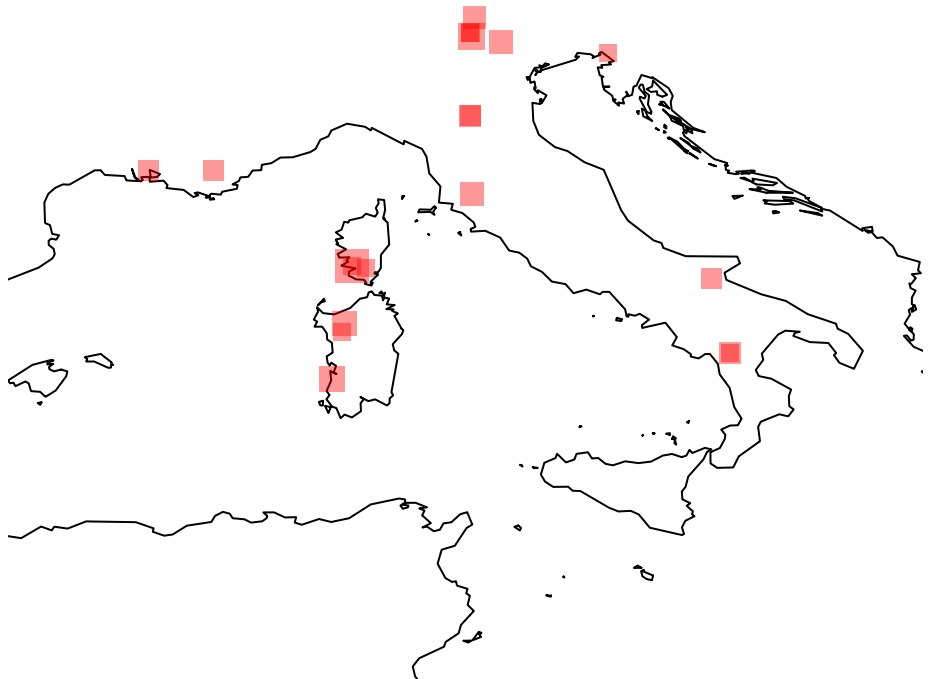

6495 cal. BC

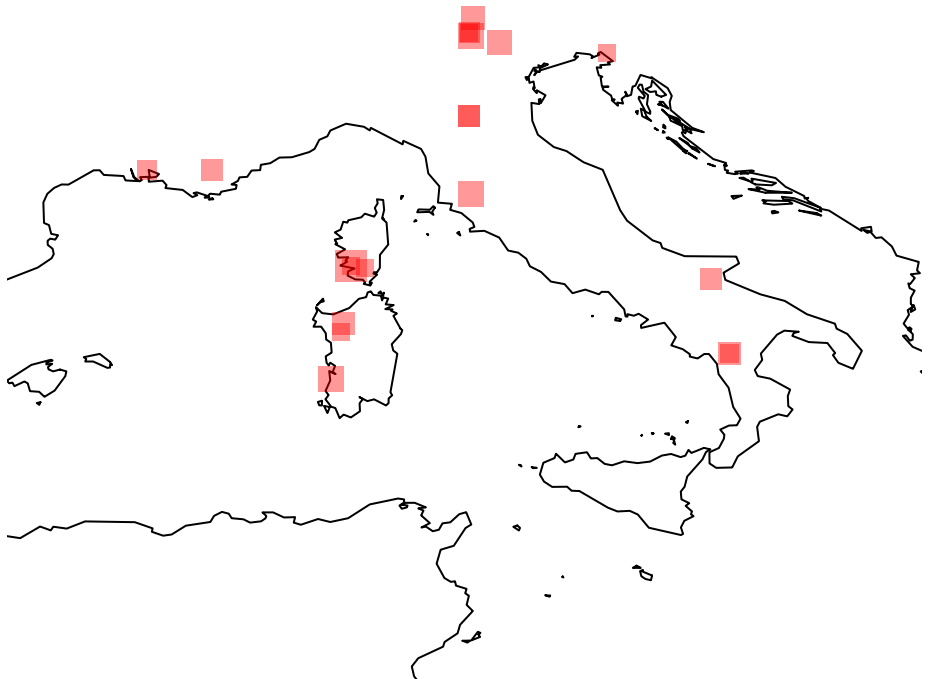

6490 cal. BC

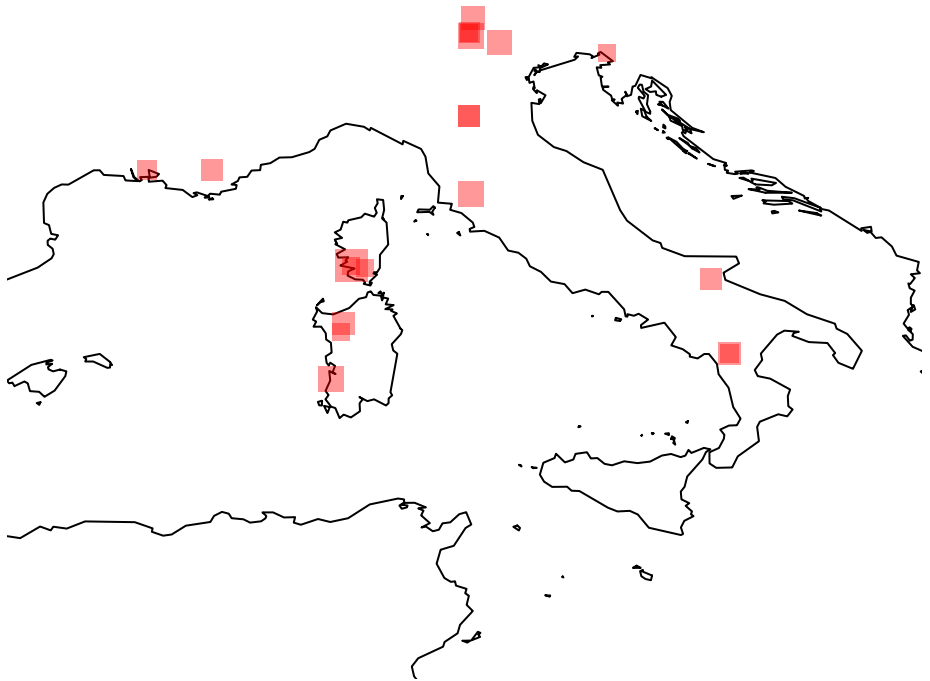



6485 cal. BC

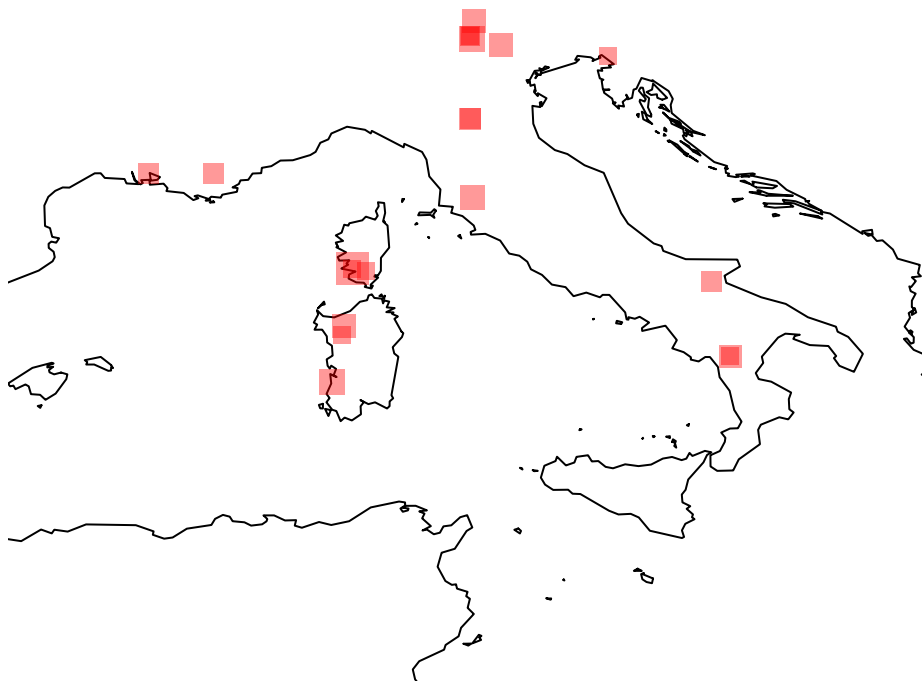

6480 cal. BC

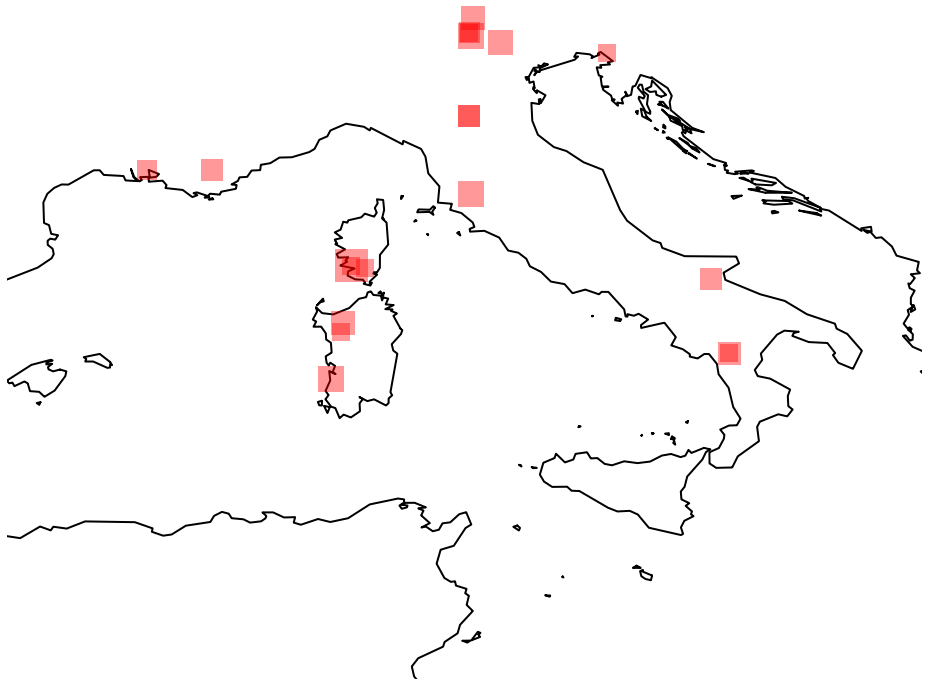

6475 cal. BC

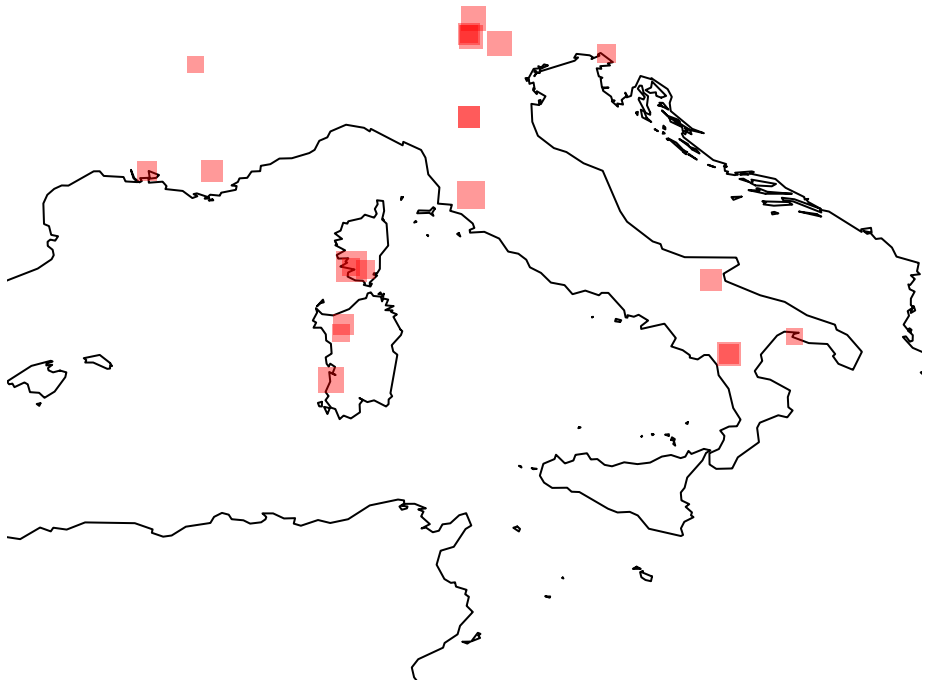

6470 cal. BC

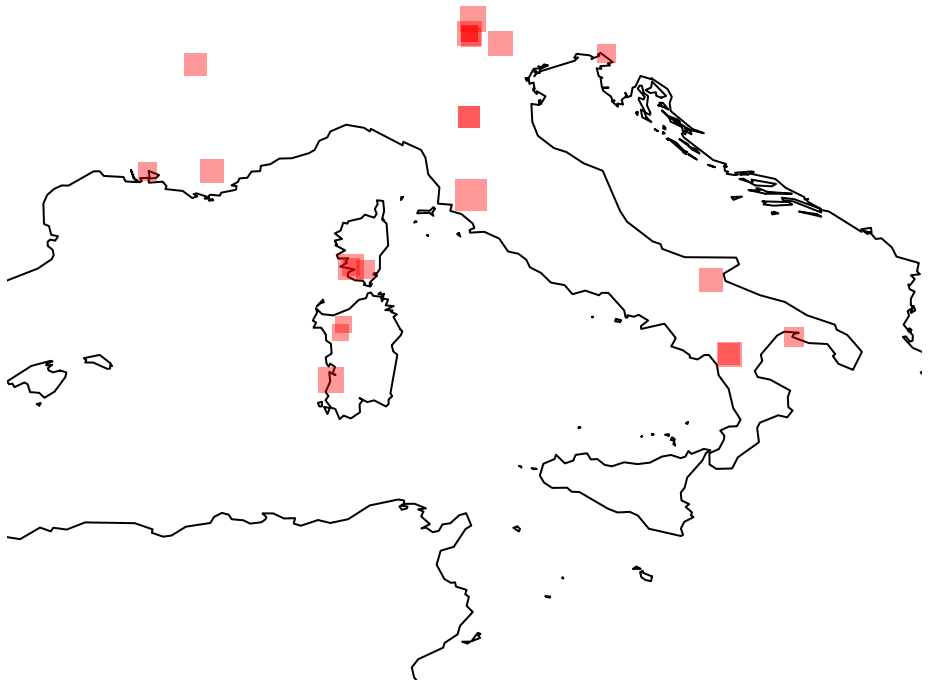

6465 cal. BC

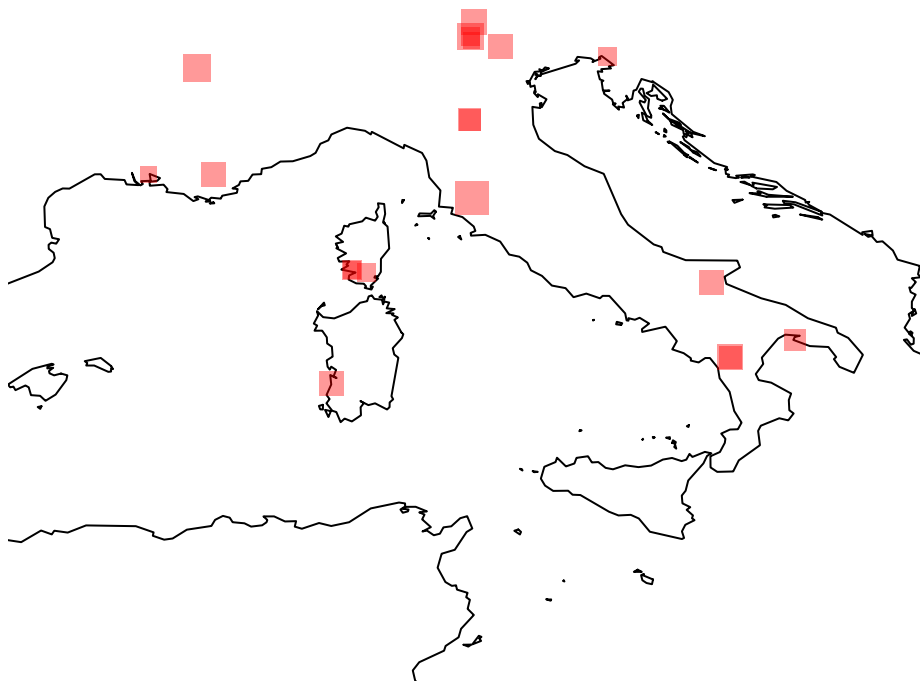





6450 cal. BC

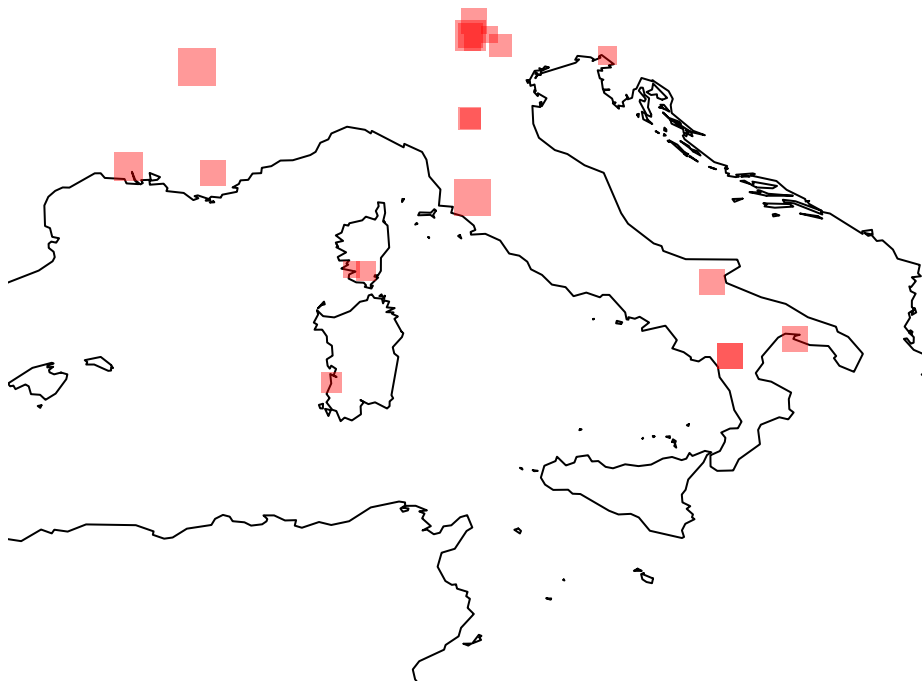



6445 cal. BC

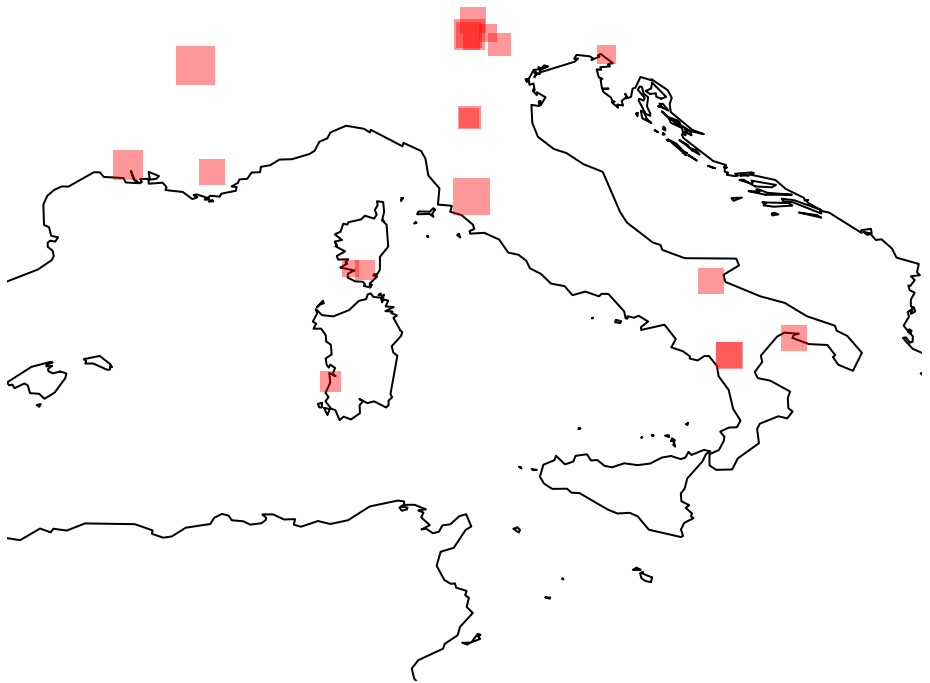

**6440 cal. BC**

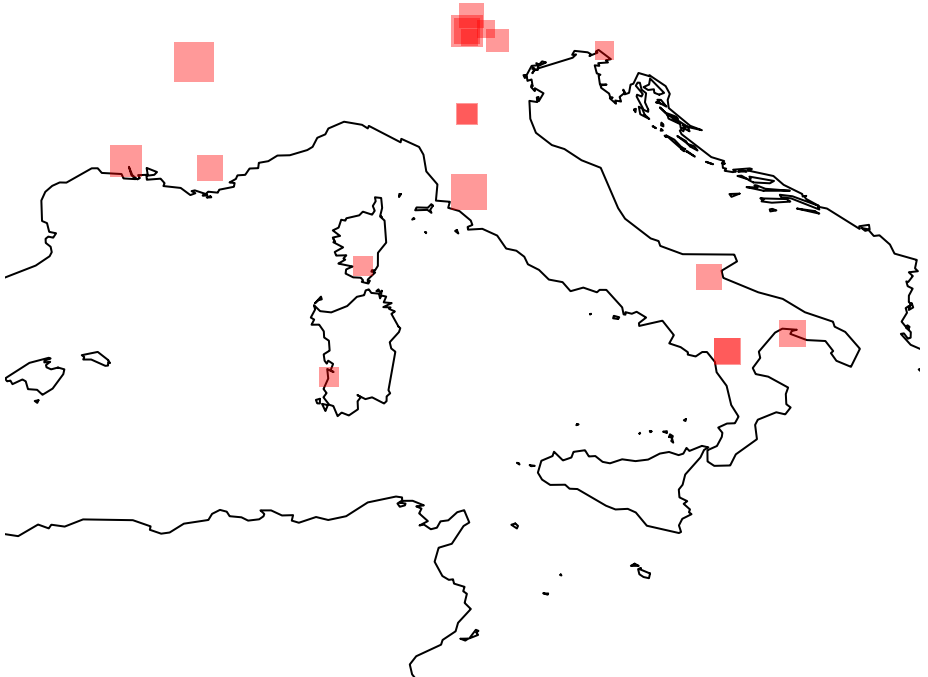



6430 cal. BC

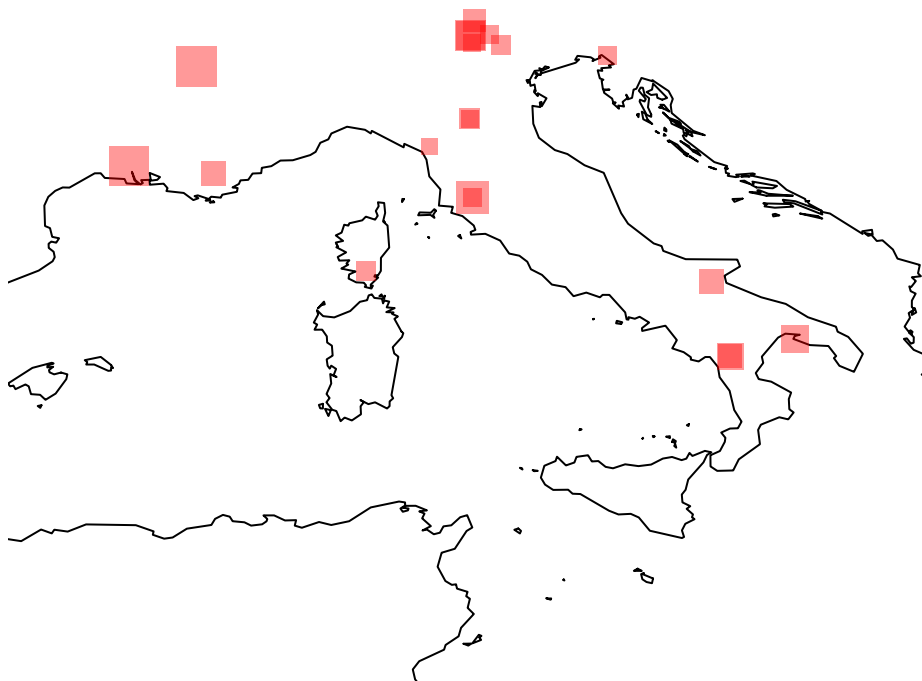

6425 cal. BC

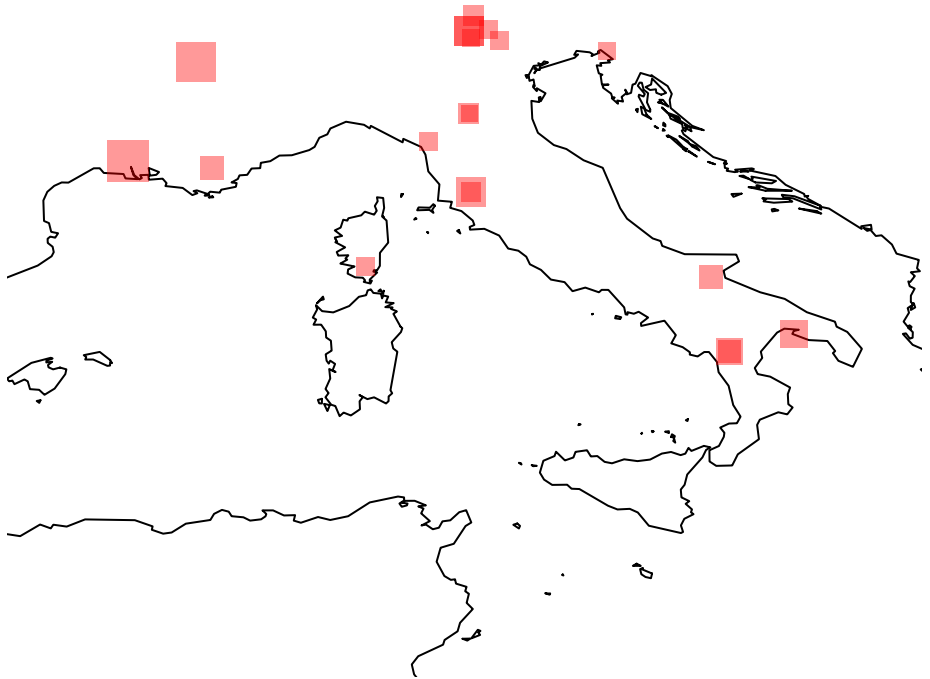

6420 cal. BC

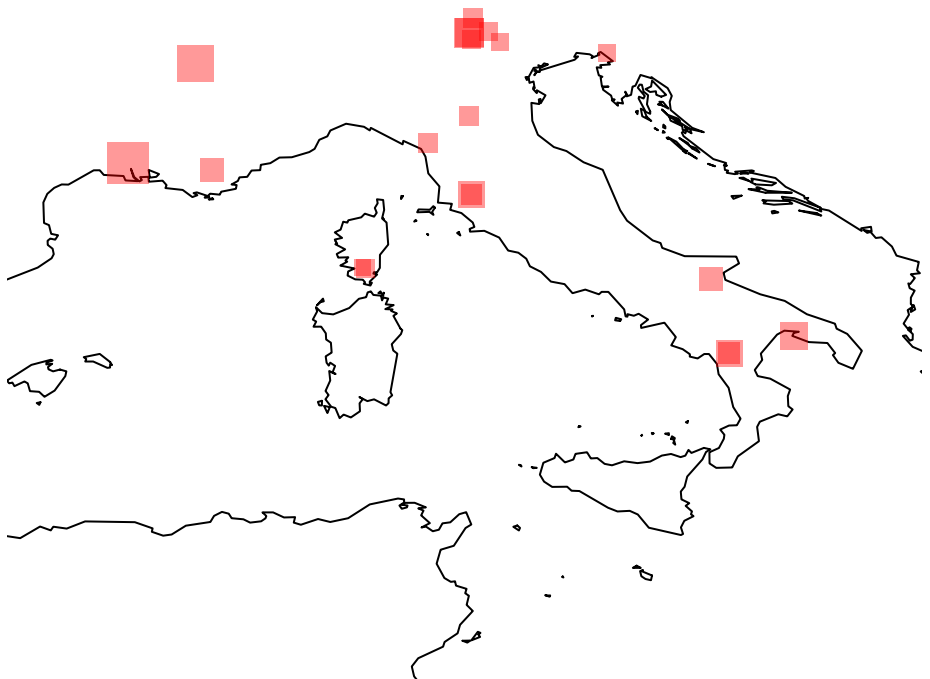







**6405 cal. BC**

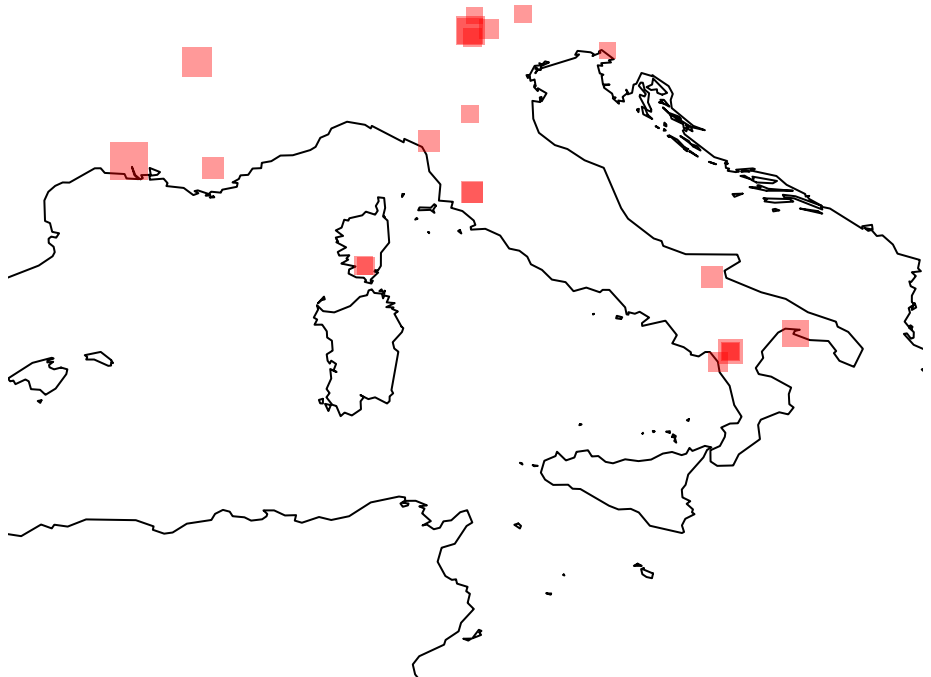

6400 cal. BC

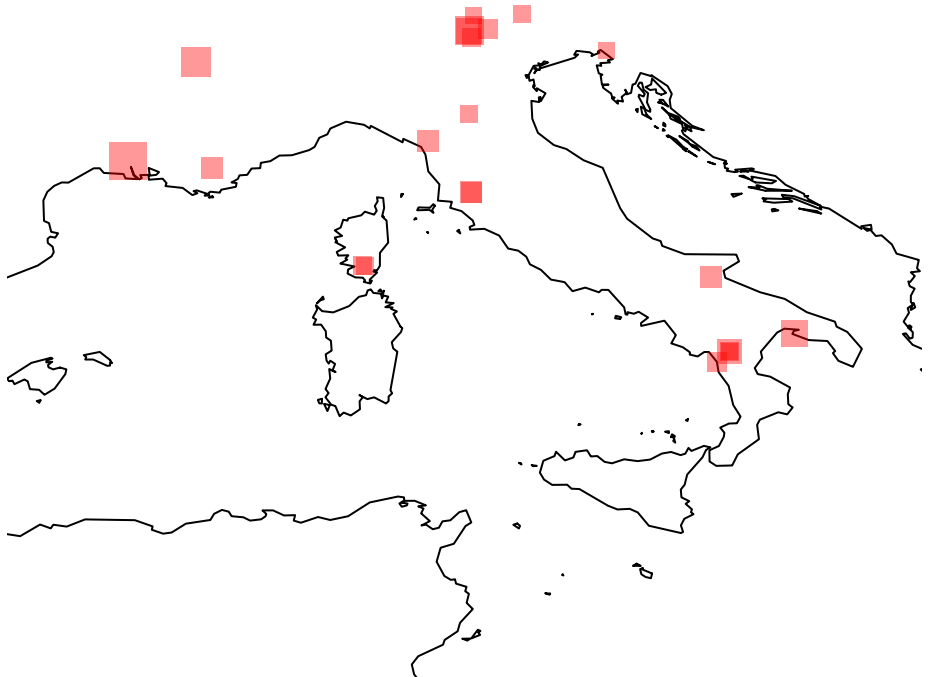

6395 cal. BC

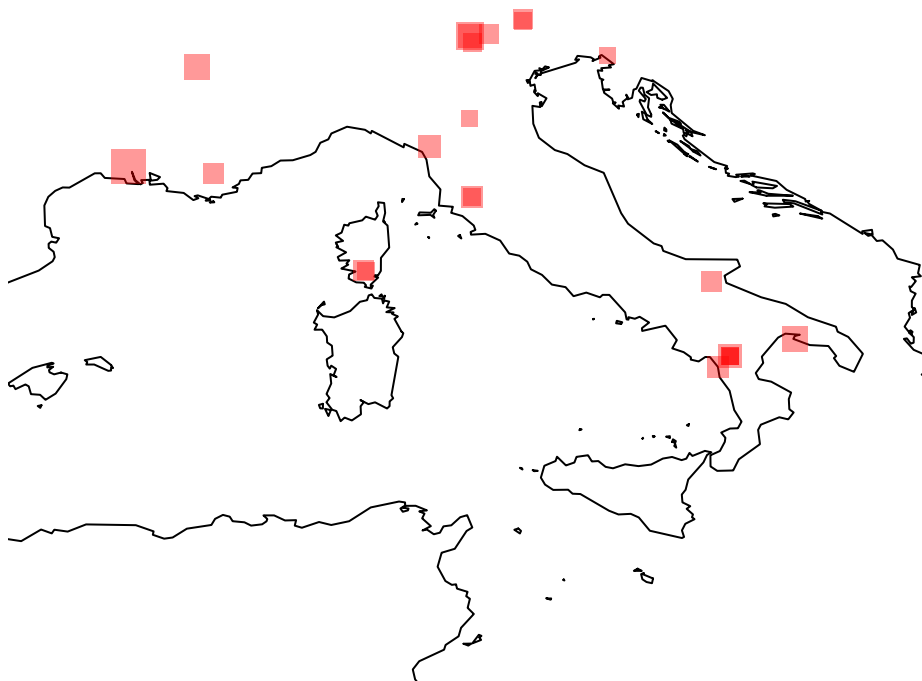

6390 cal. BC

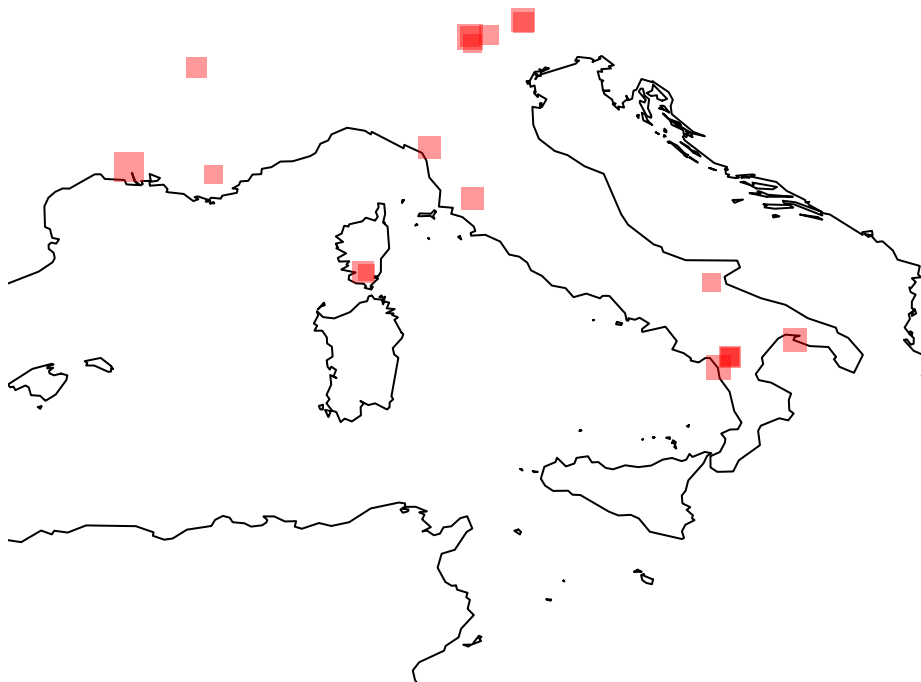

6385 cal. BC

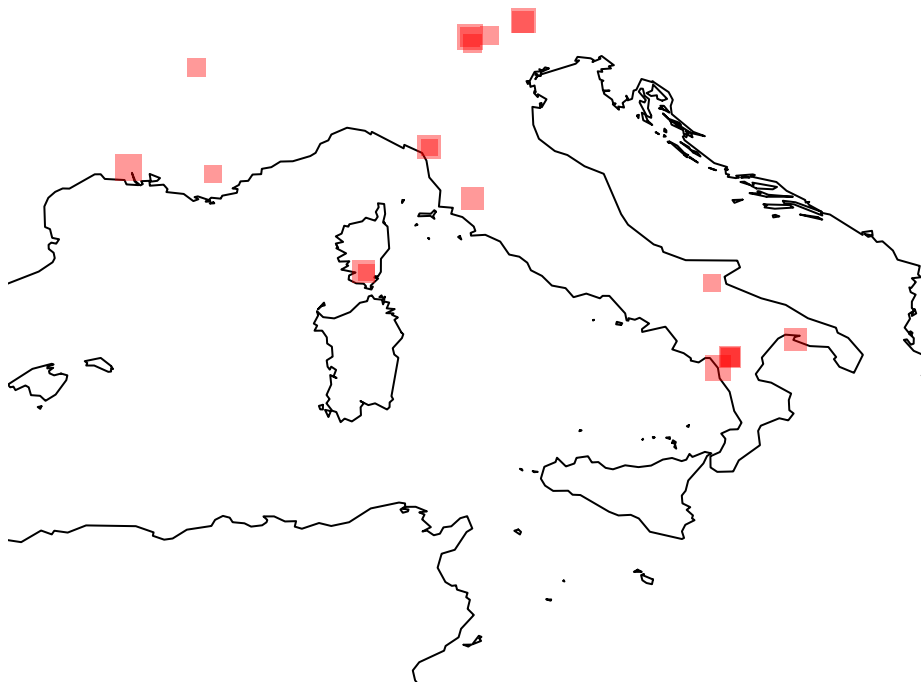

6380 cal. BC

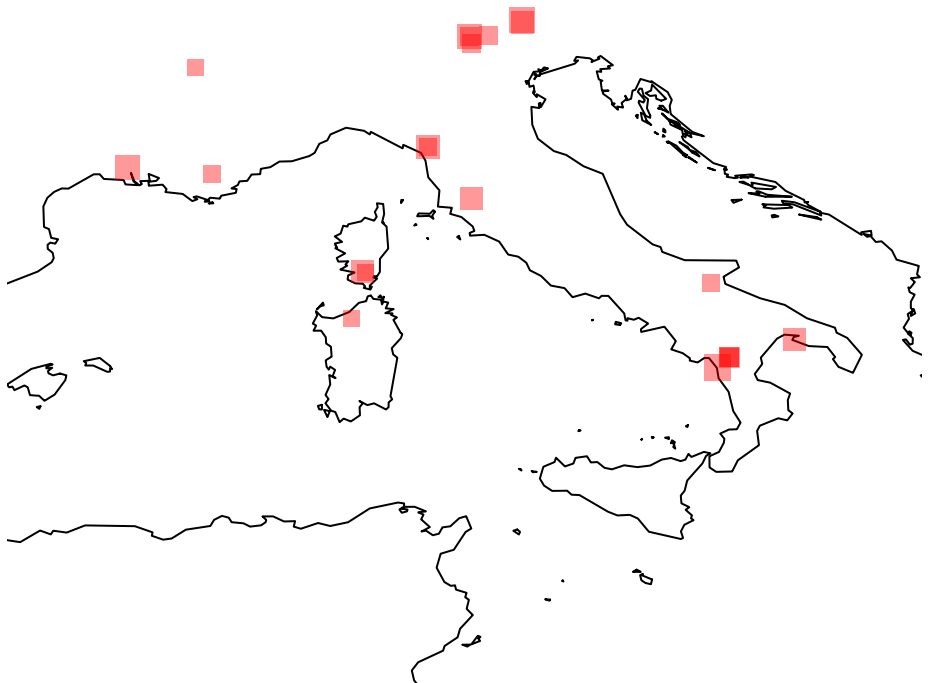

6375 cal. BC

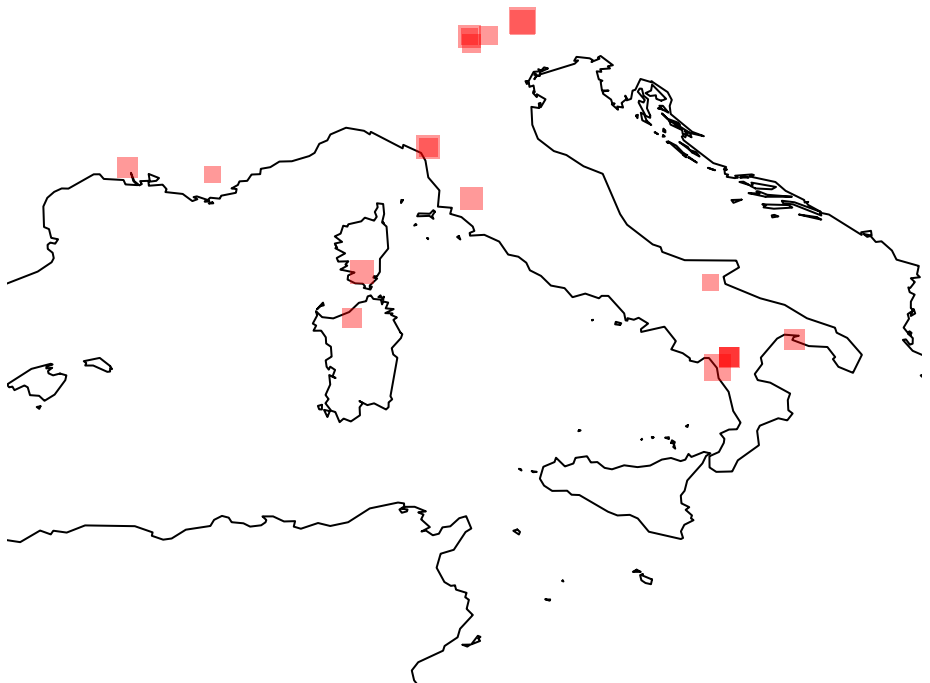

6370 cal. BC

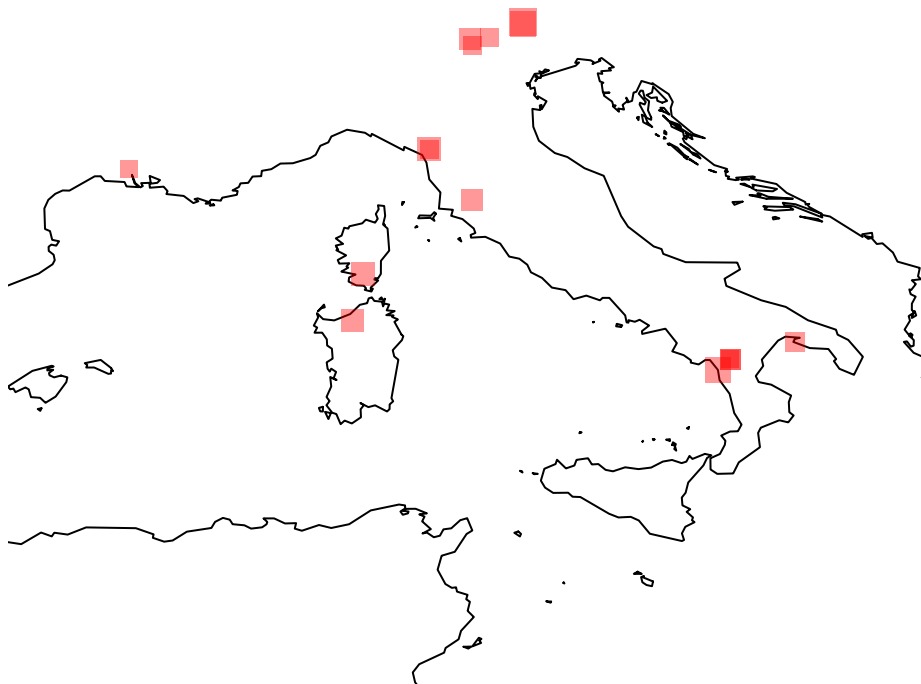



6365 cal. BC

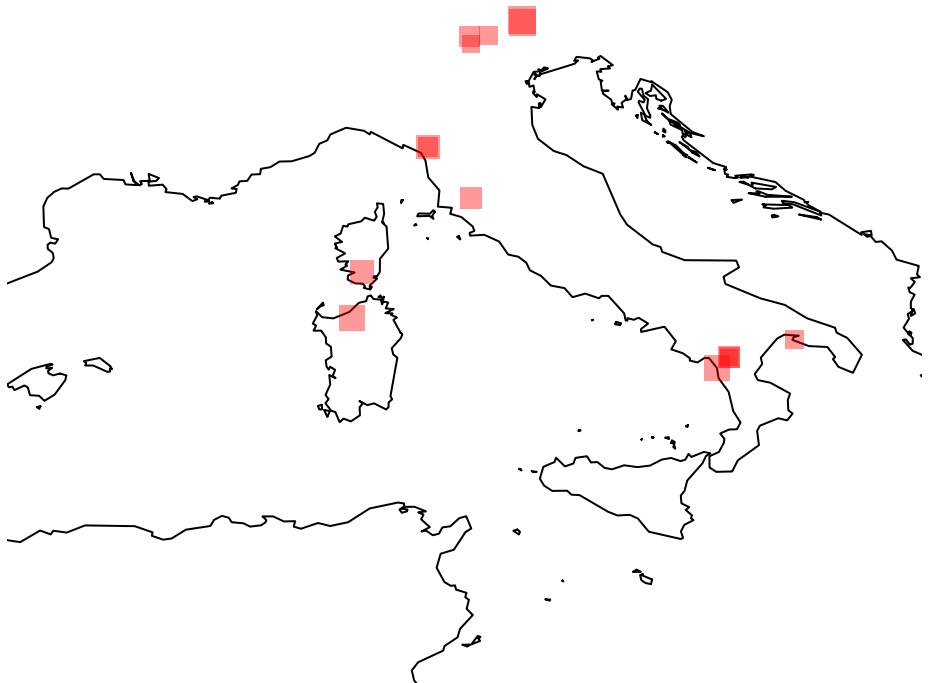



**6355 cal. BC**

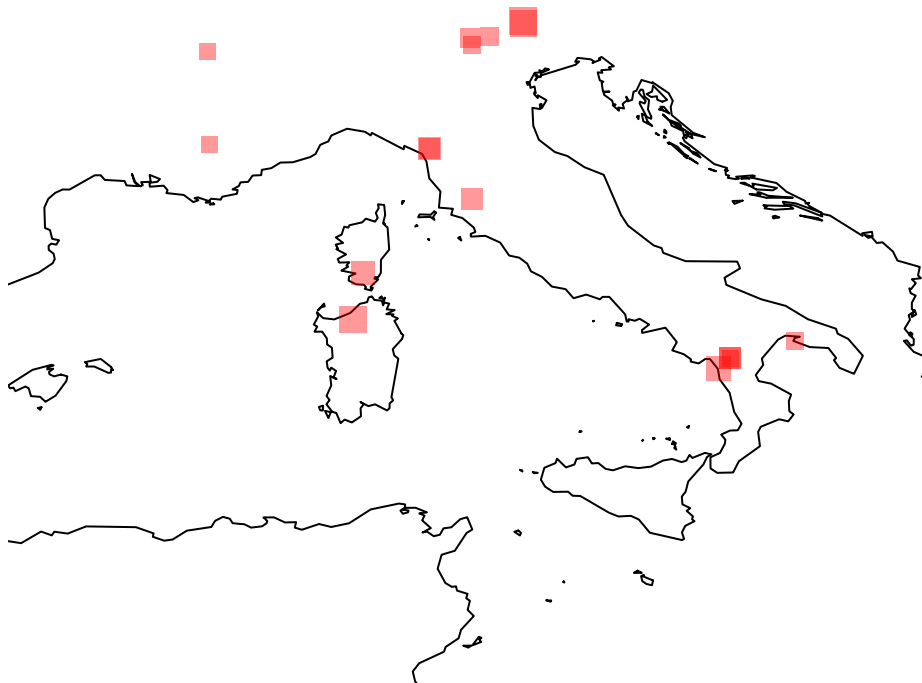

**6350 cal. BC**

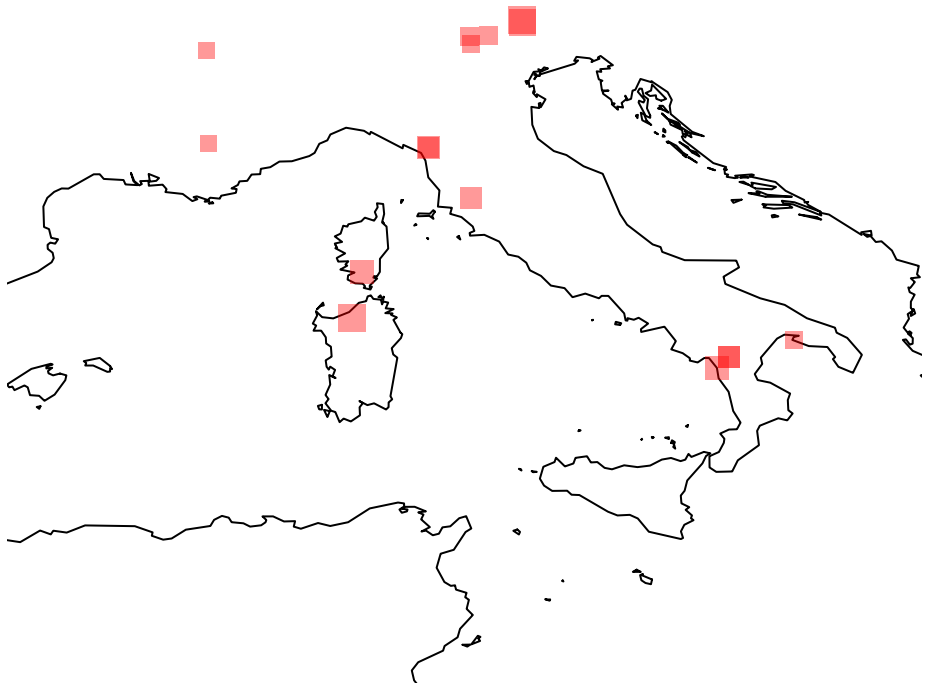

6345 cal. BC

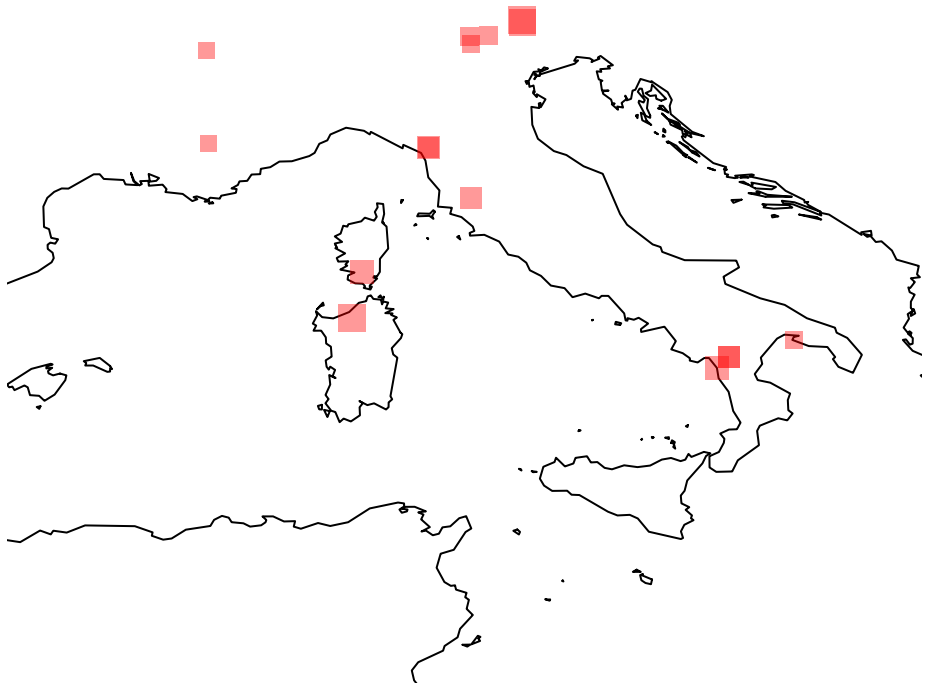

6340 cal. BC

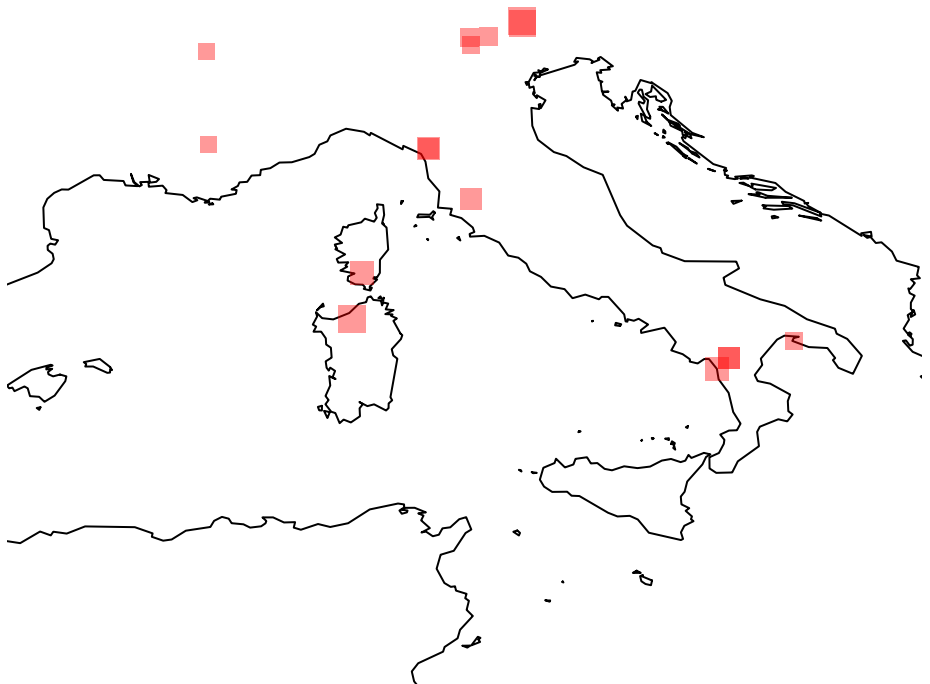

6335 cal. BC

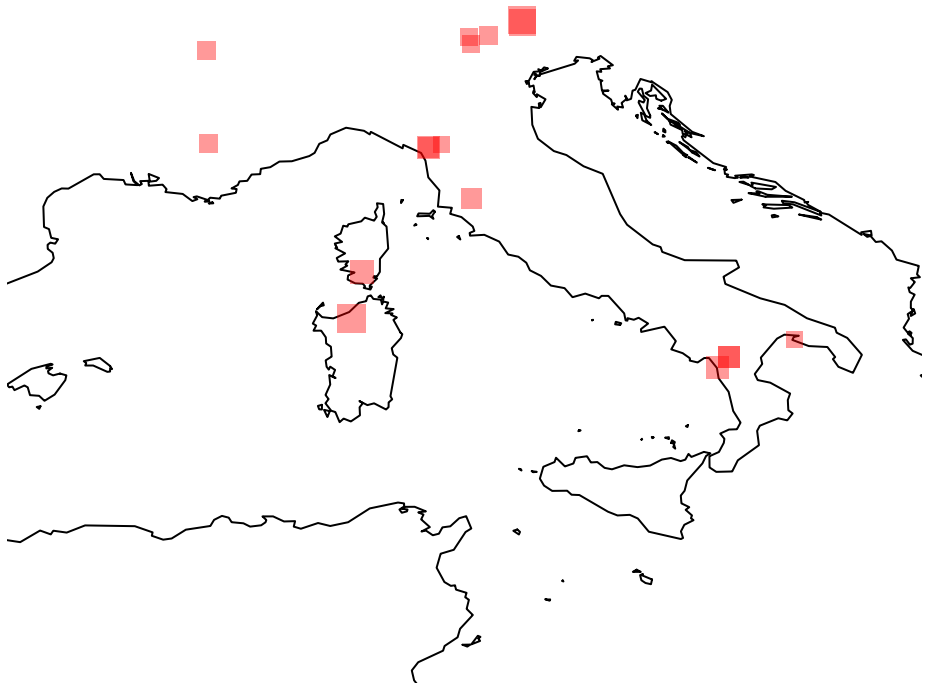

6330 cal. BC

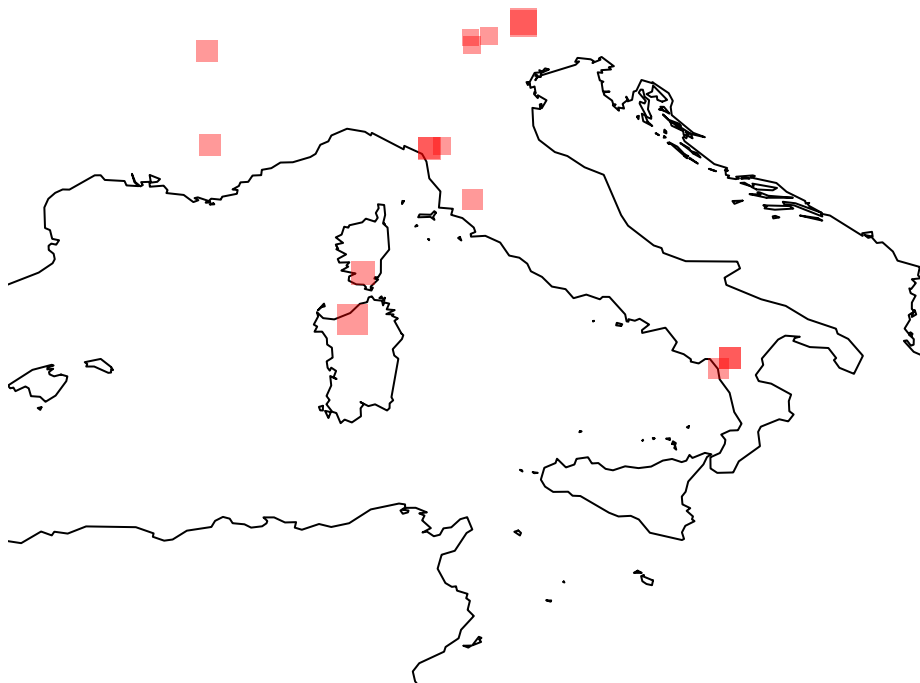



**6325 cal. BC**

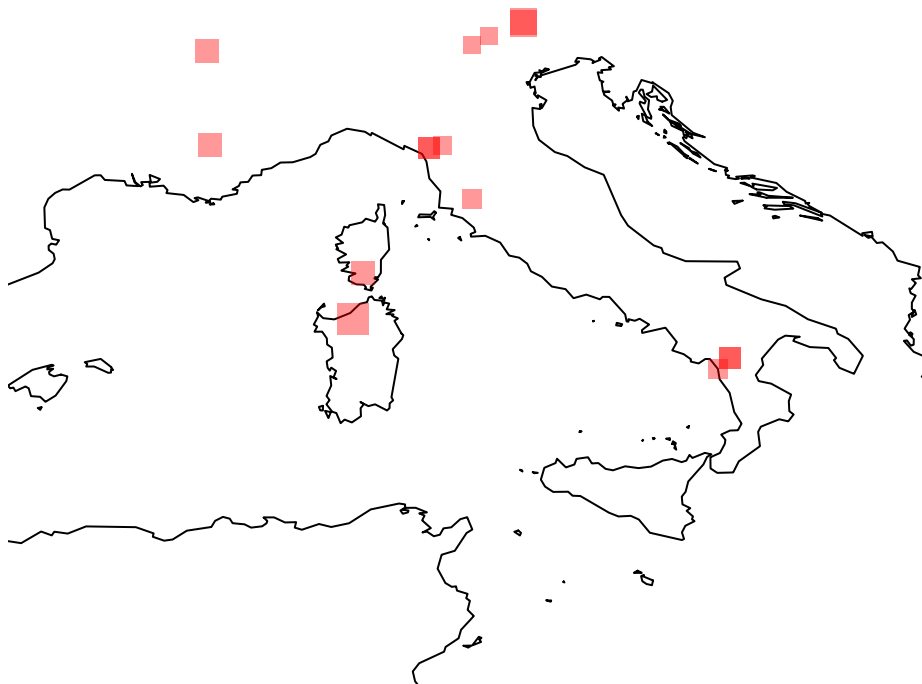

**6320 cal. BC**

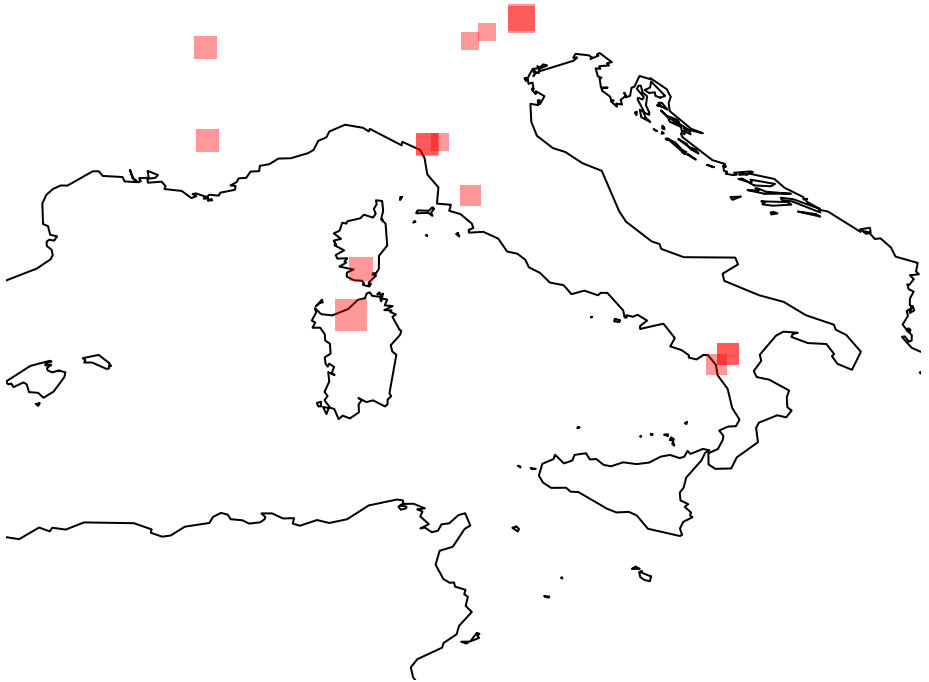

**6315 cal. BC**

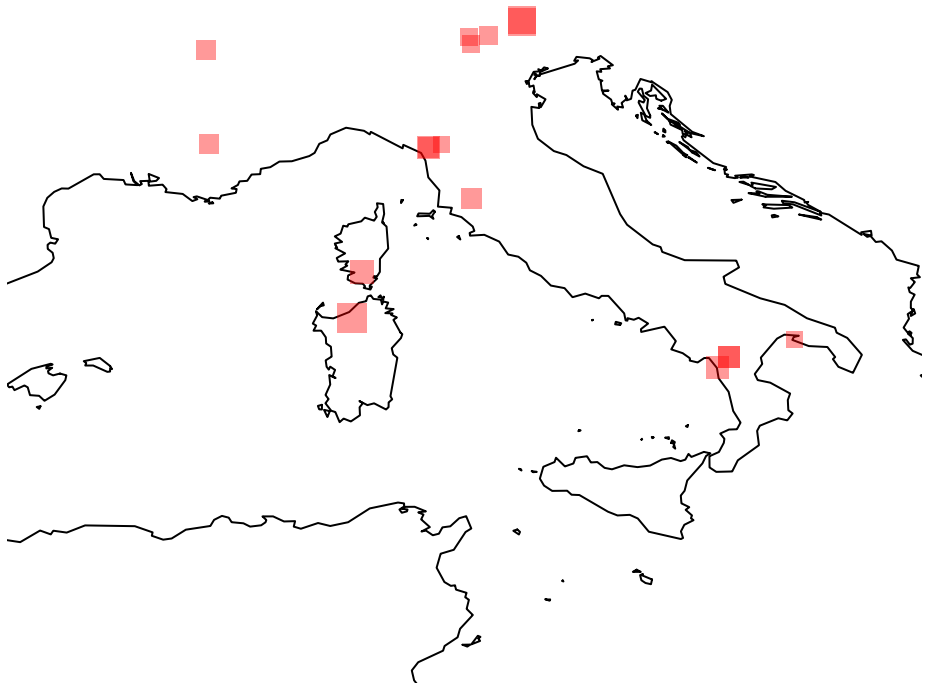

6310 cal. BC

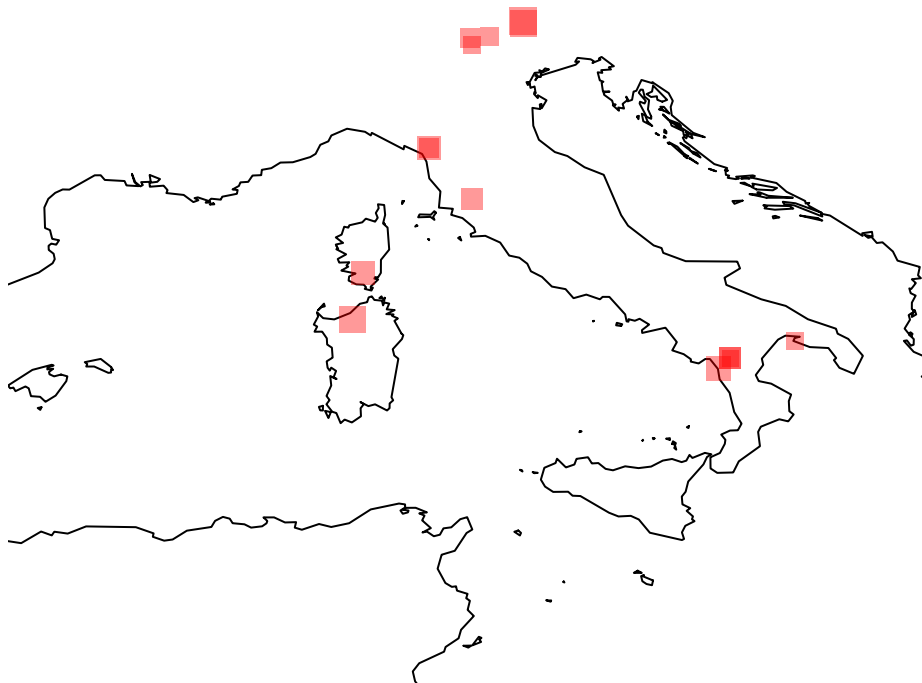

**6305 cal. BC**

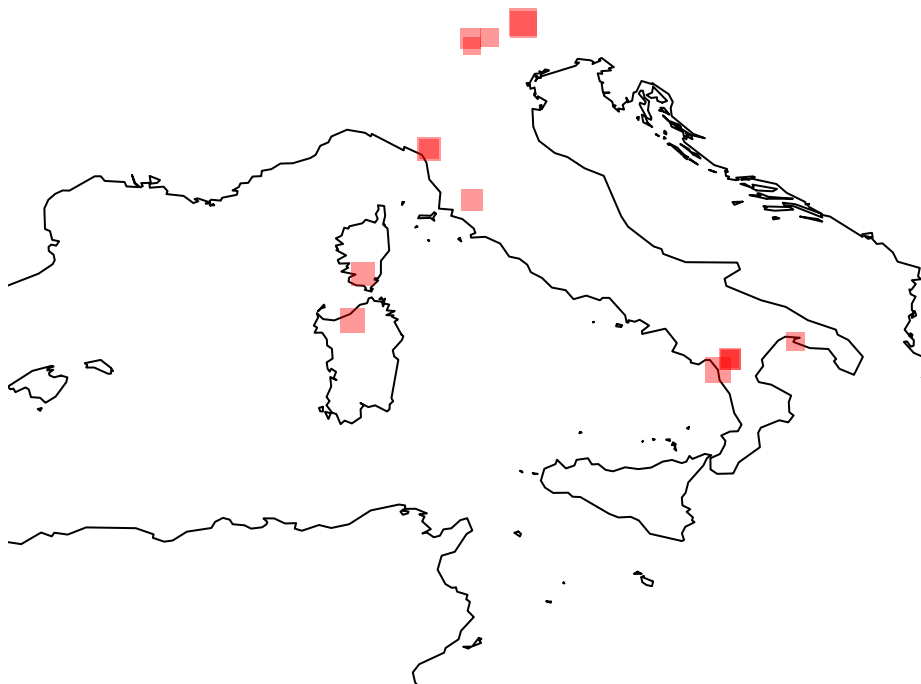

6300 cal. BC

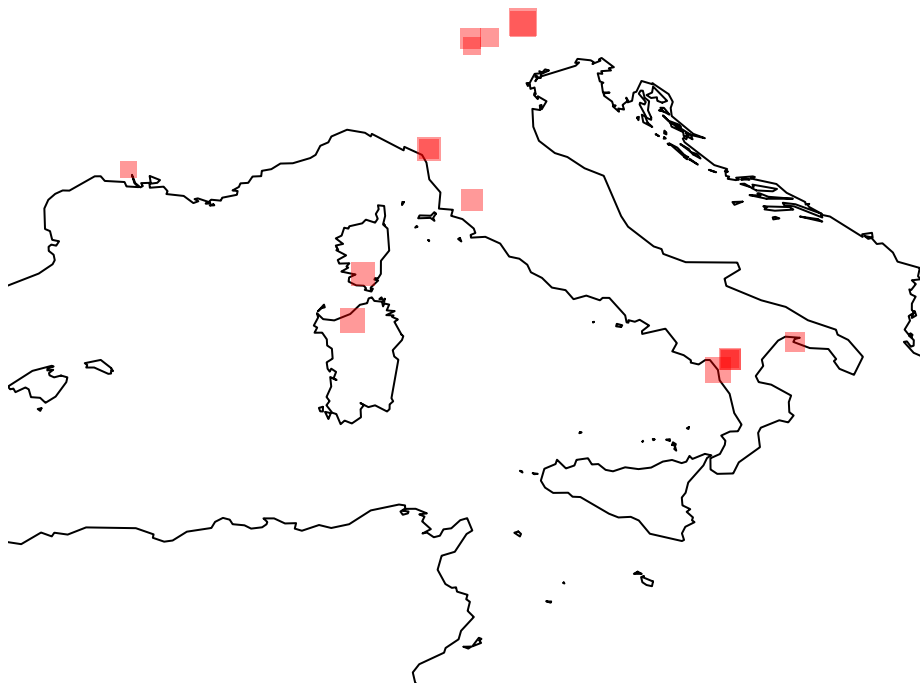



6290 cal. BC

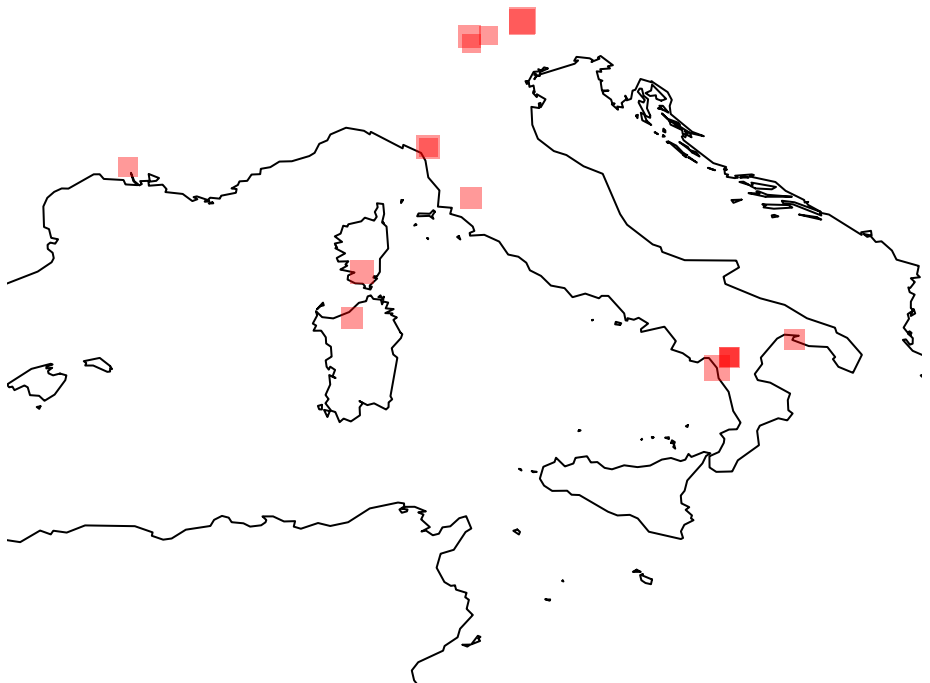



6285 cal. BC

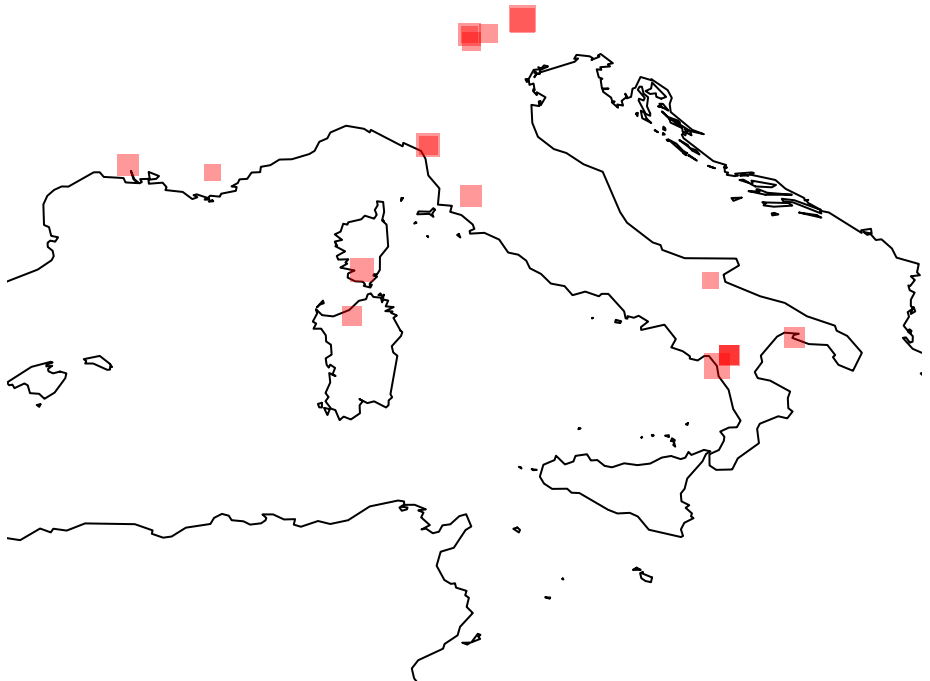

6280 cal. BC

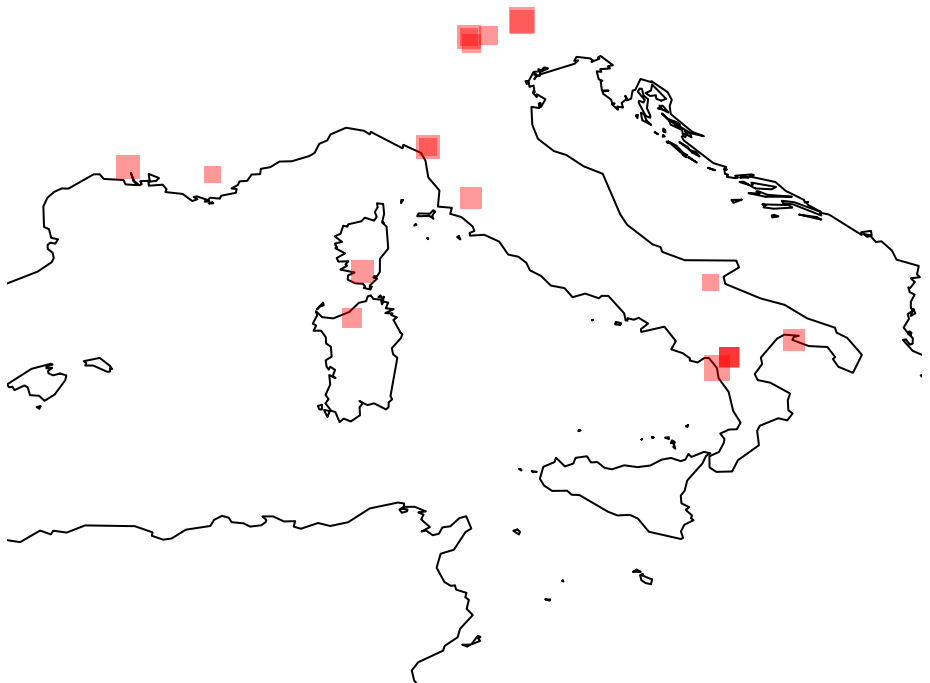

6275 cal. BC

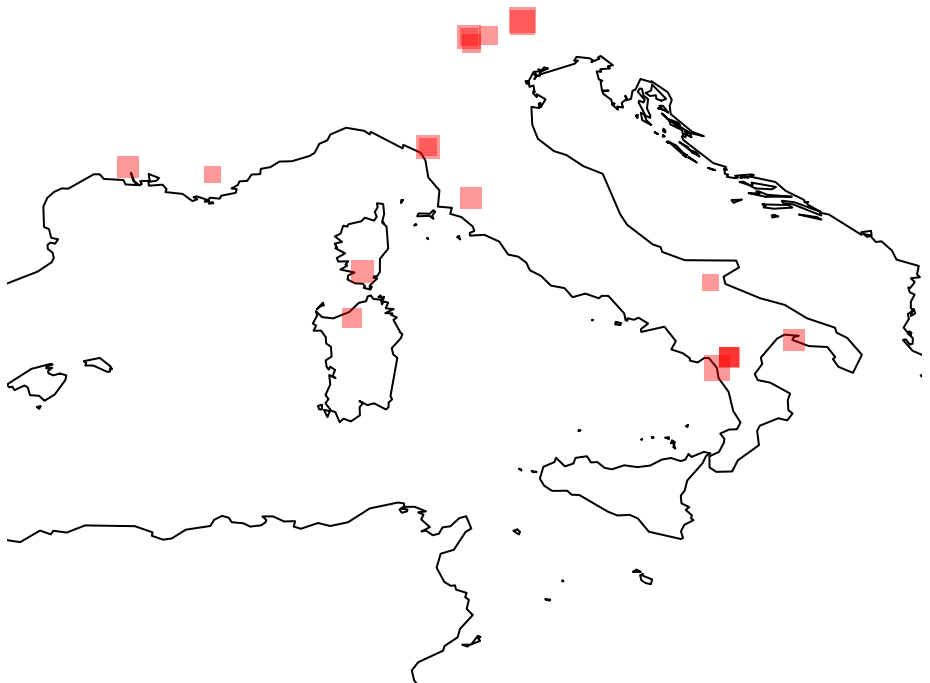

6270 cal. BC

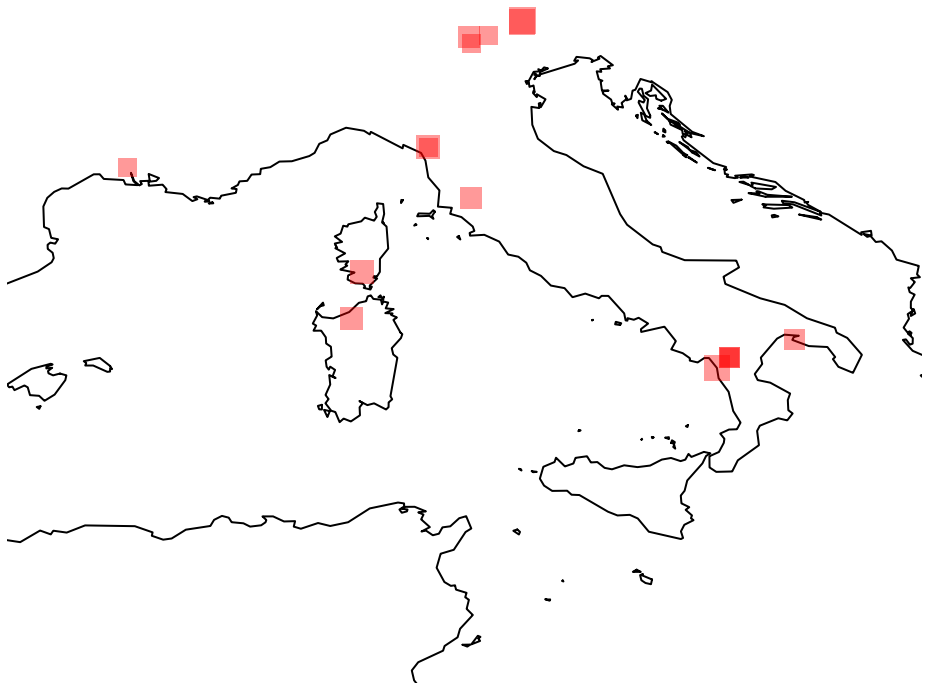

6265 cal. BC

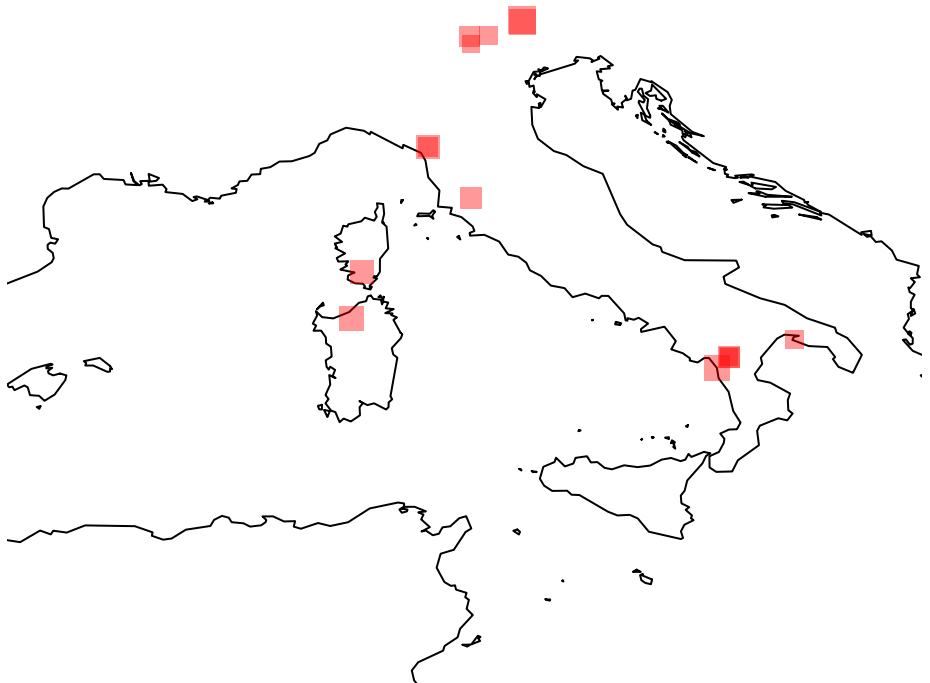

6260 cal. BC

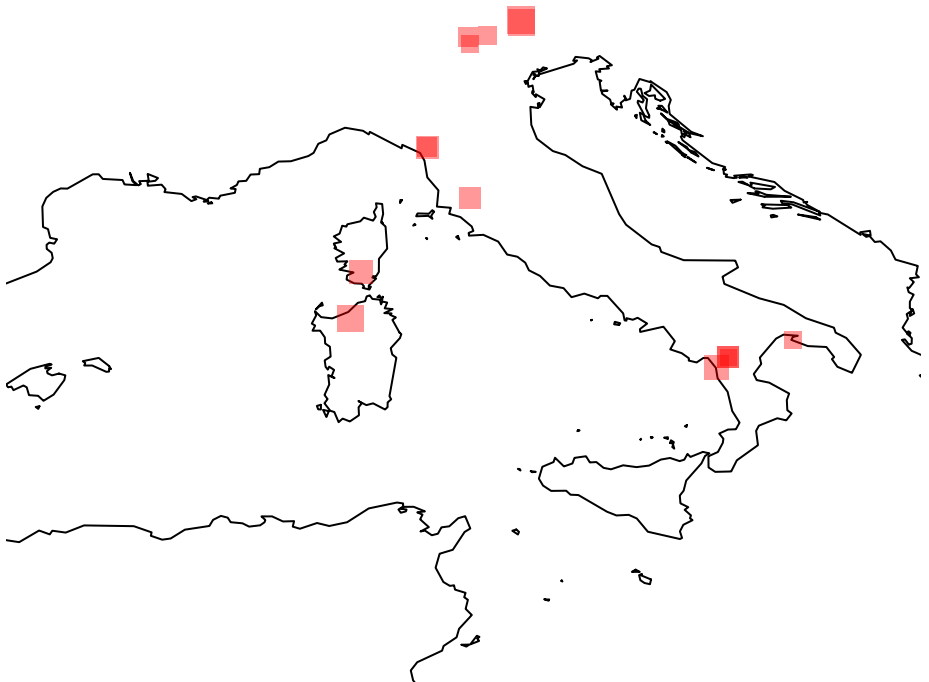

6255 cal. BC

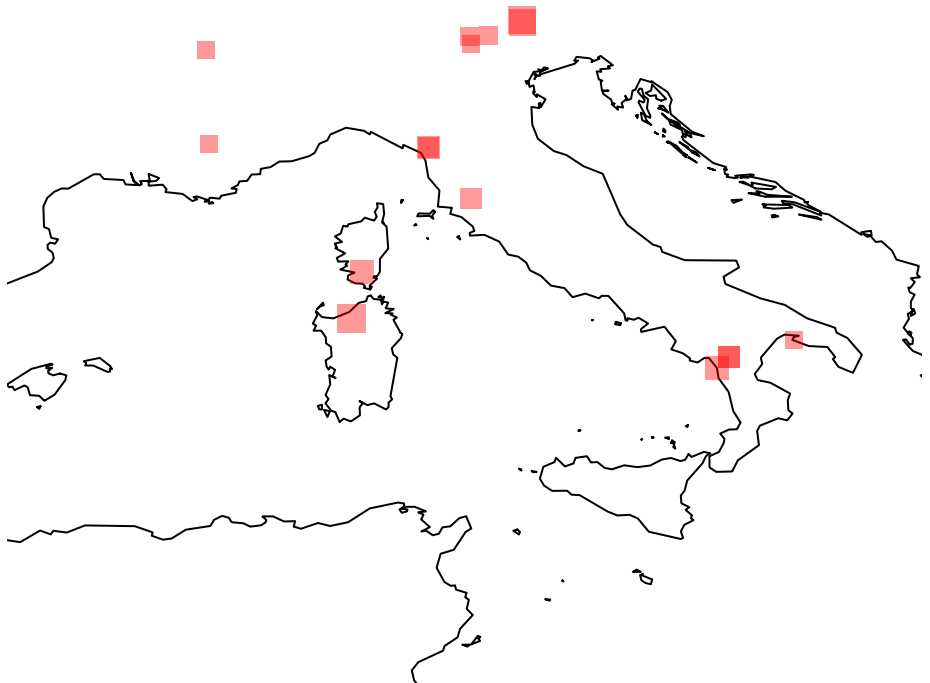

6250 cal. BC

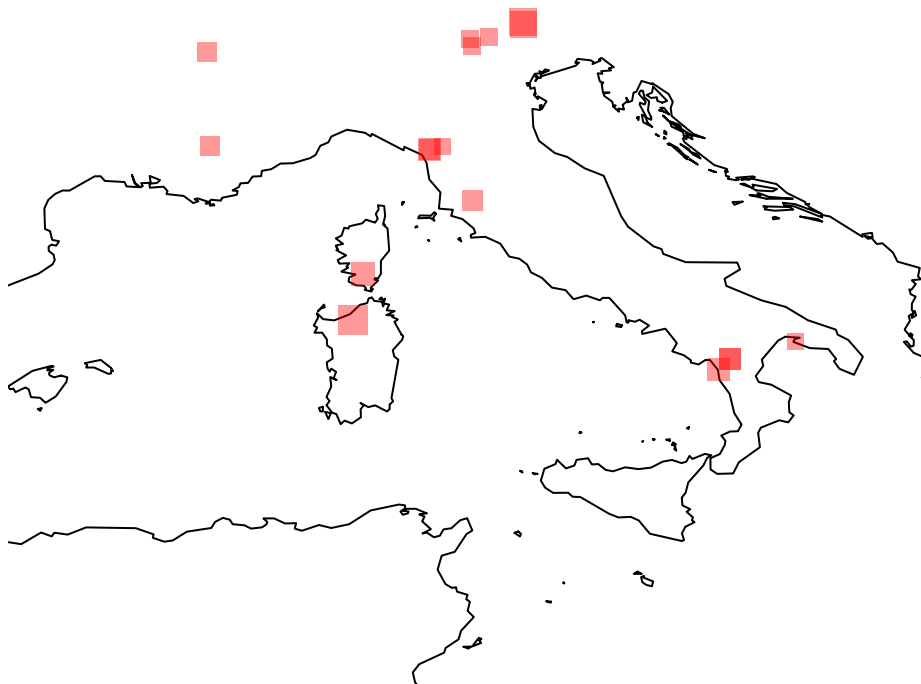



6245 cal. BC

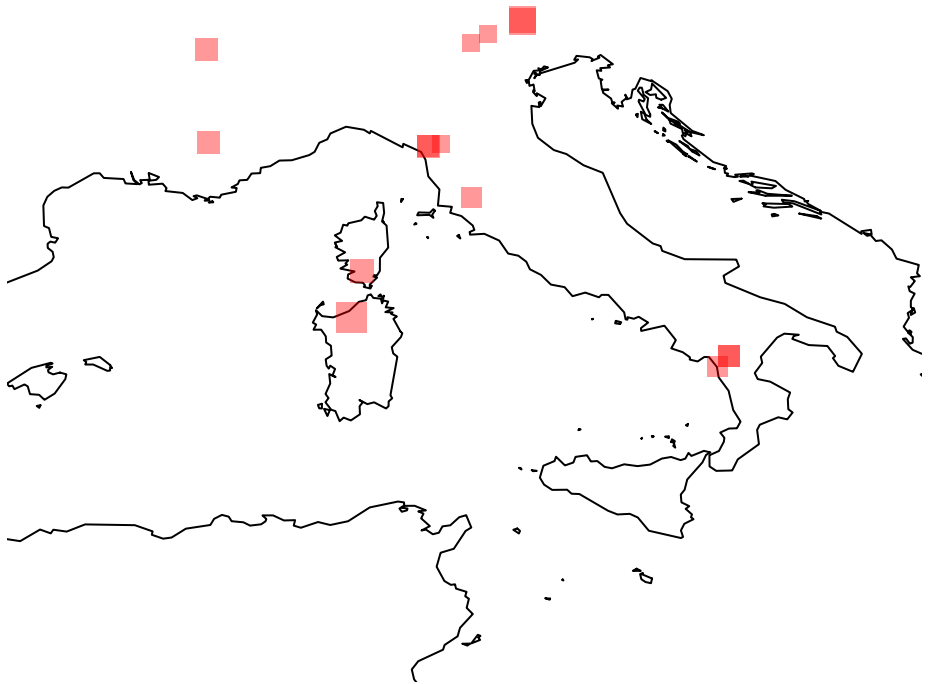

**6240 cal. BC**

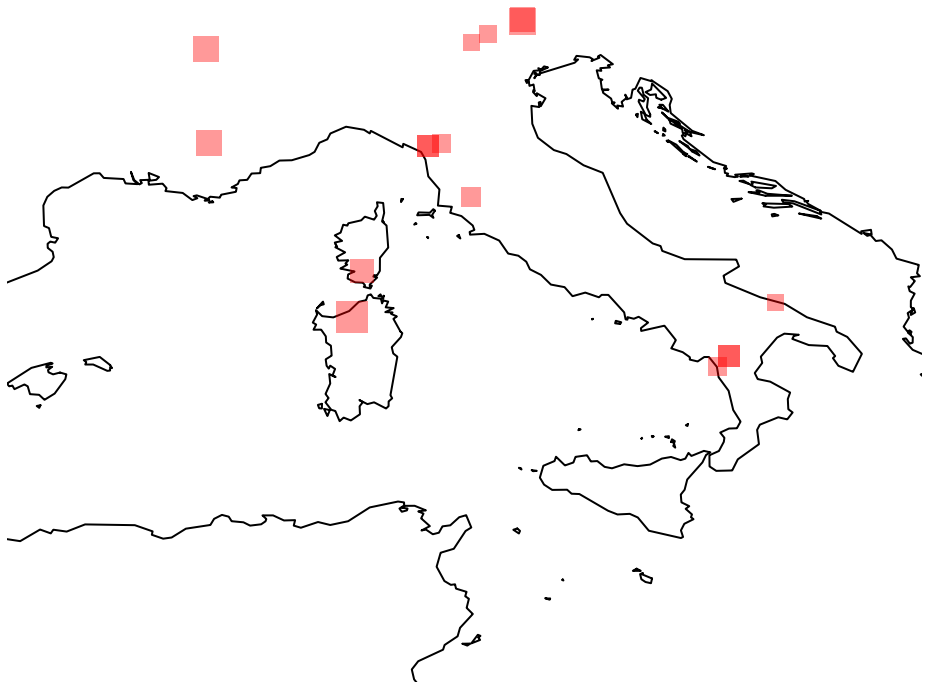

6235 cal. BC

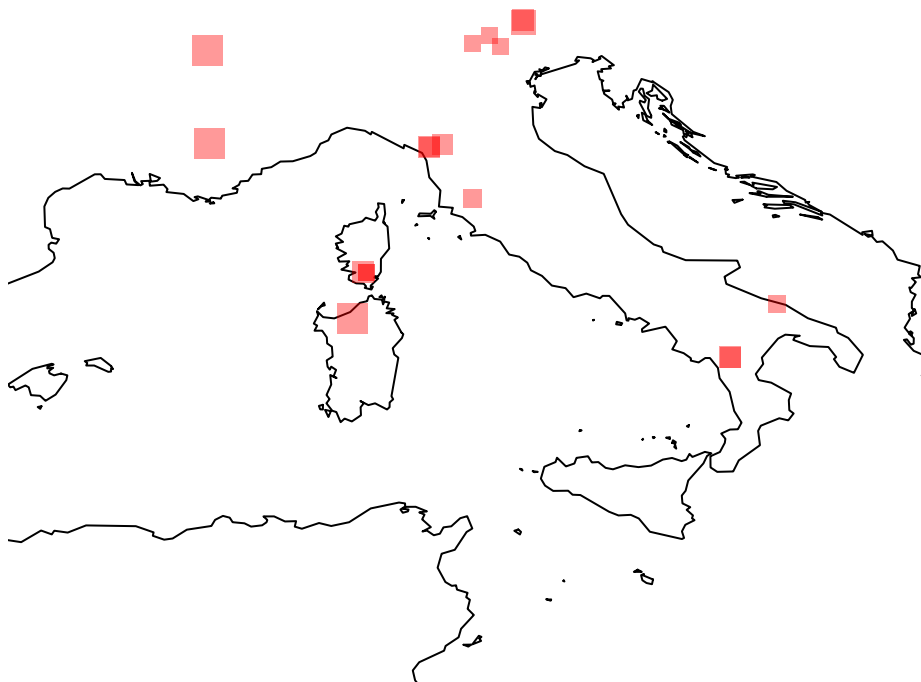

6230 cal. BC

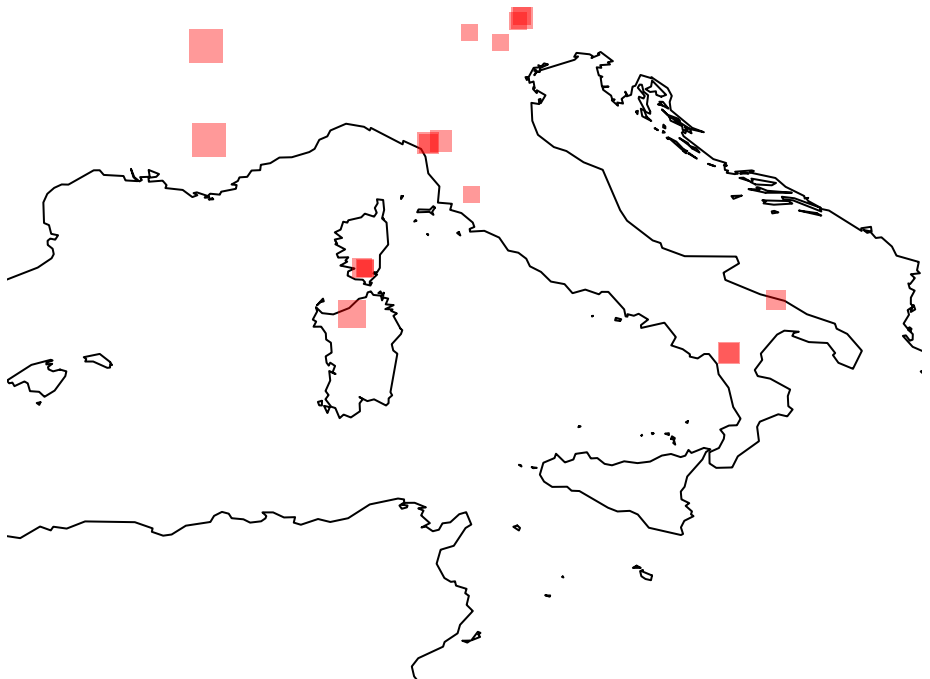

6225 cal. BC

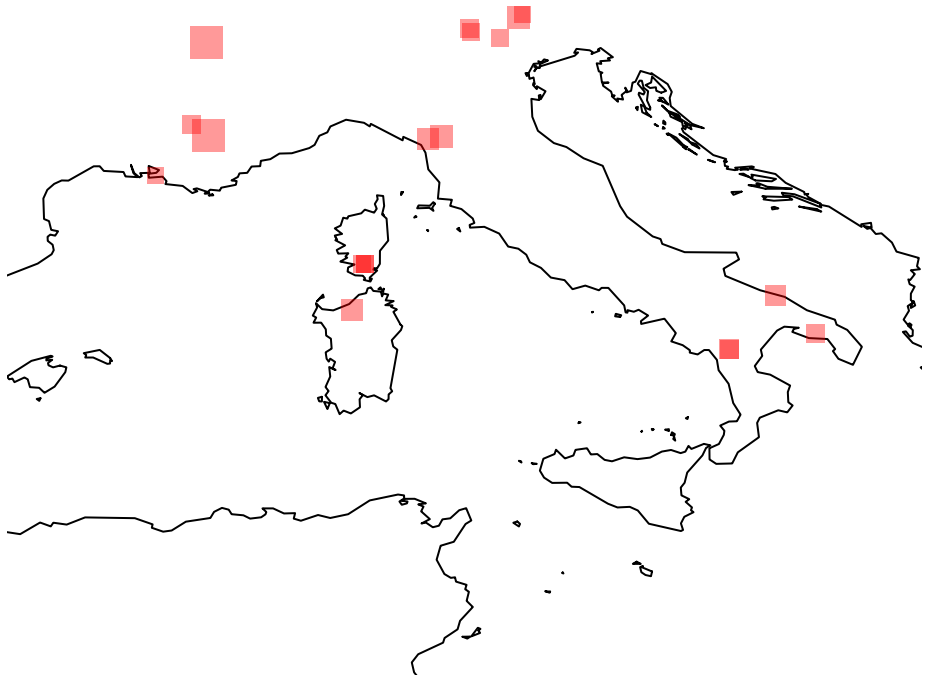

6220 cal. BC

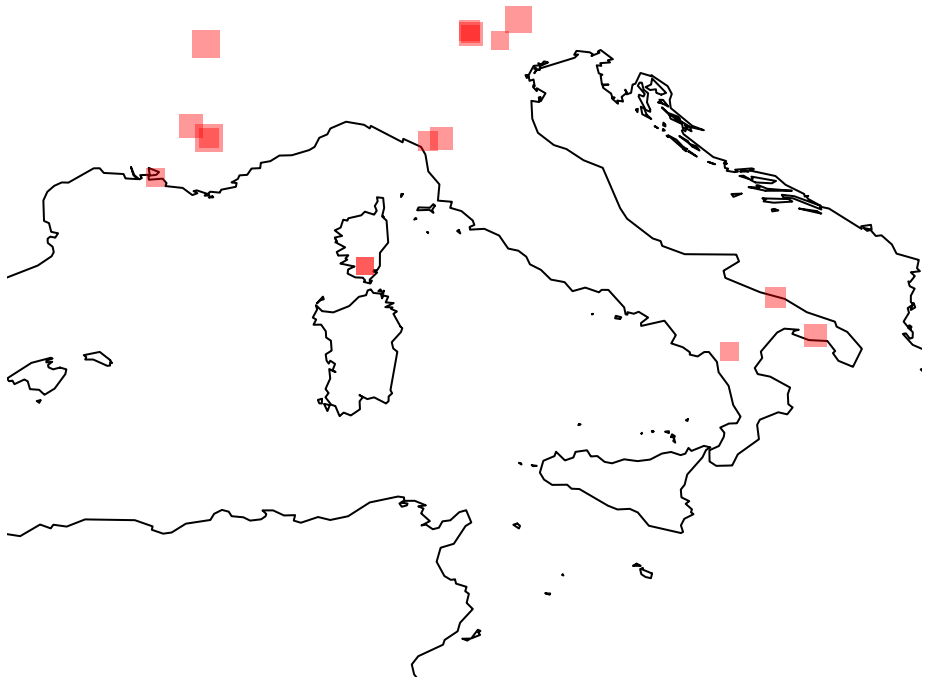

6215 cal. BC

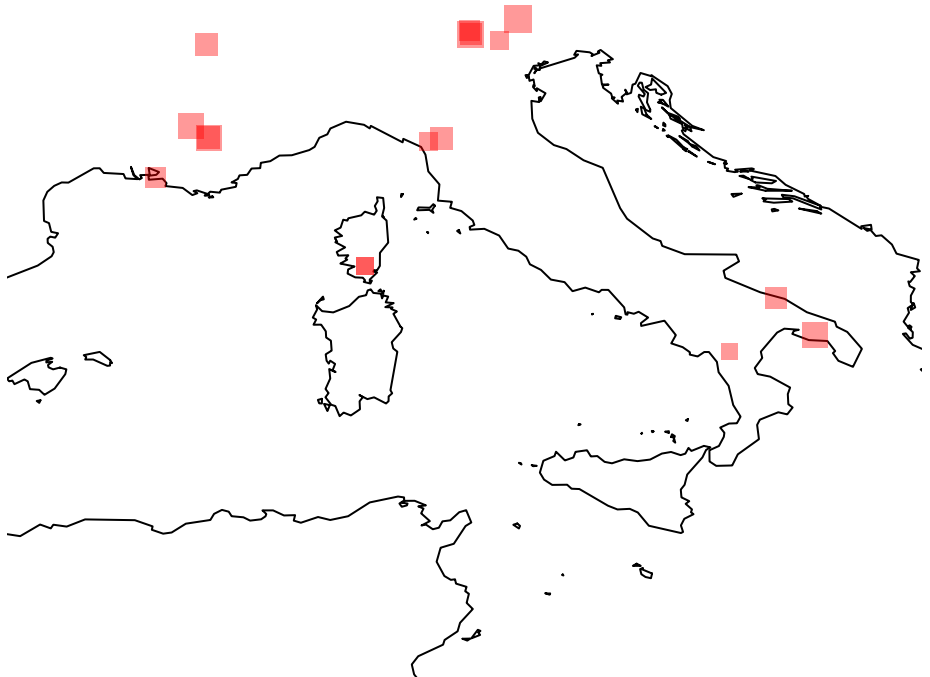

6210 cal. BC

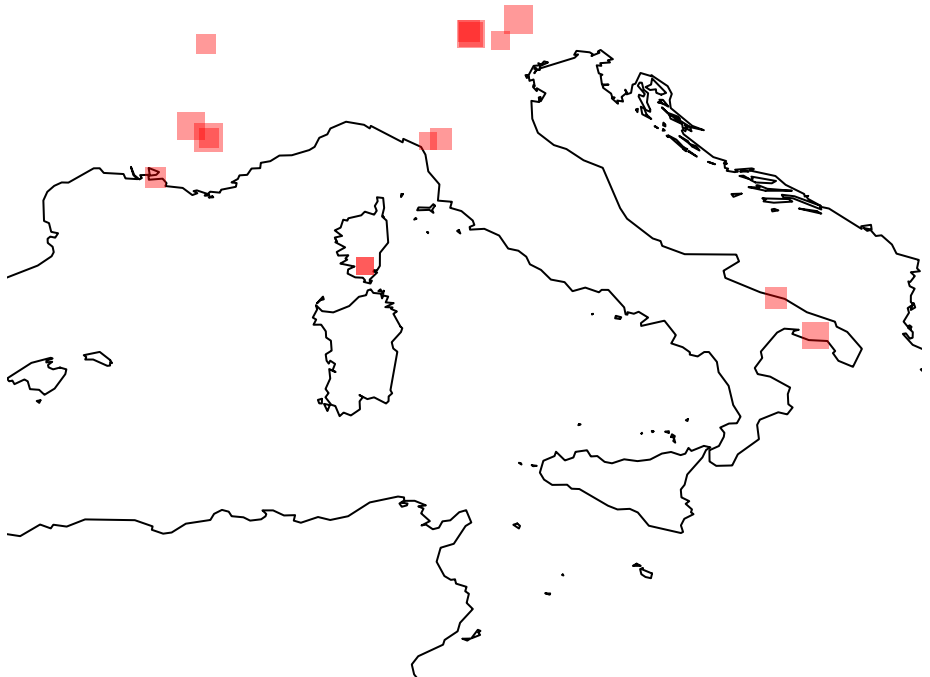



6205 cal. BC

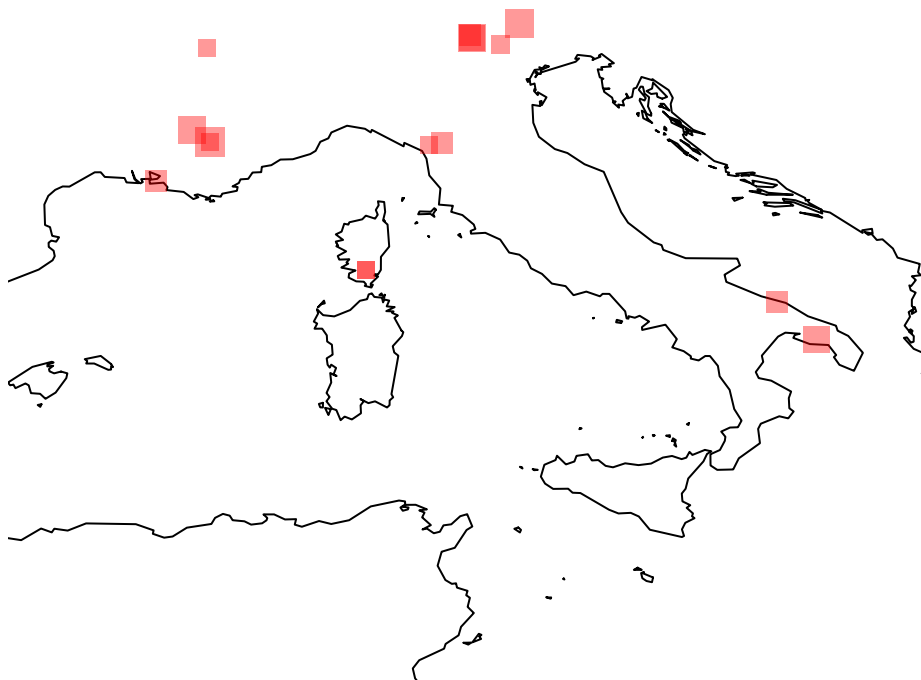



6195 cal. BC

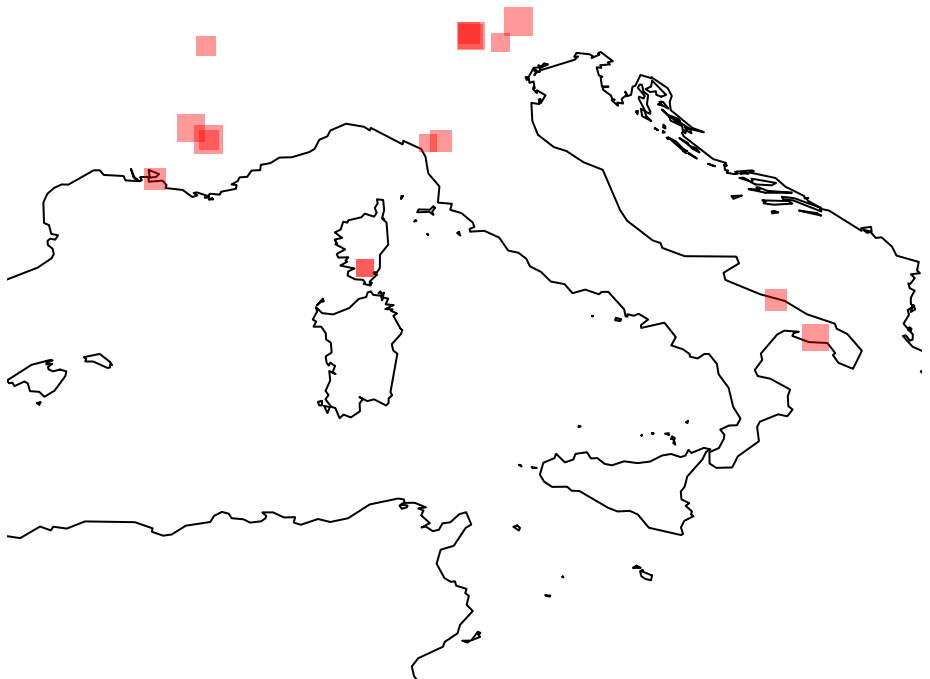



6185 cal. BC

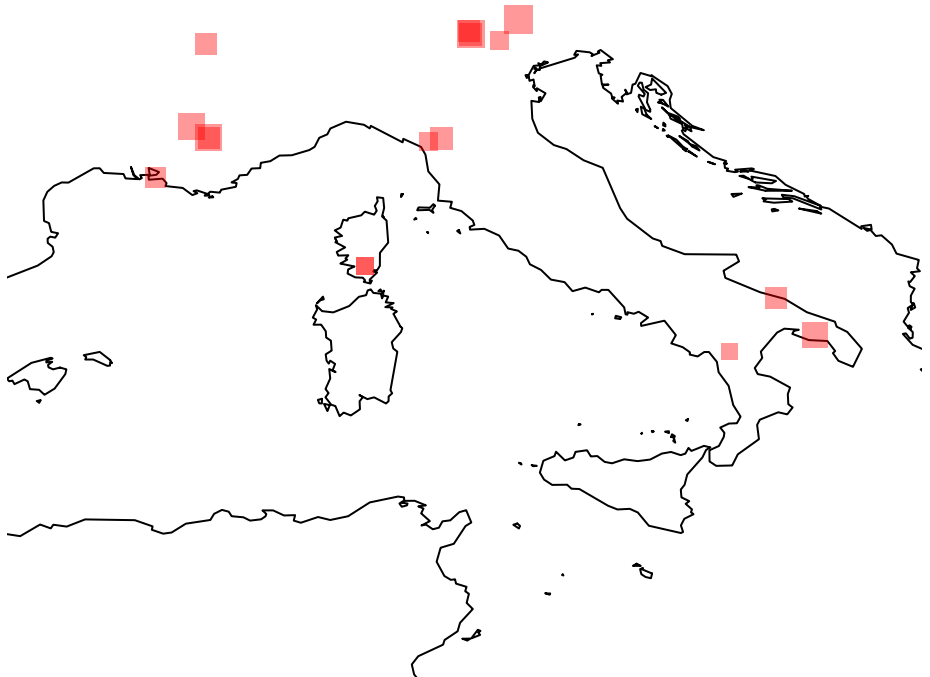

6180 cal. BC

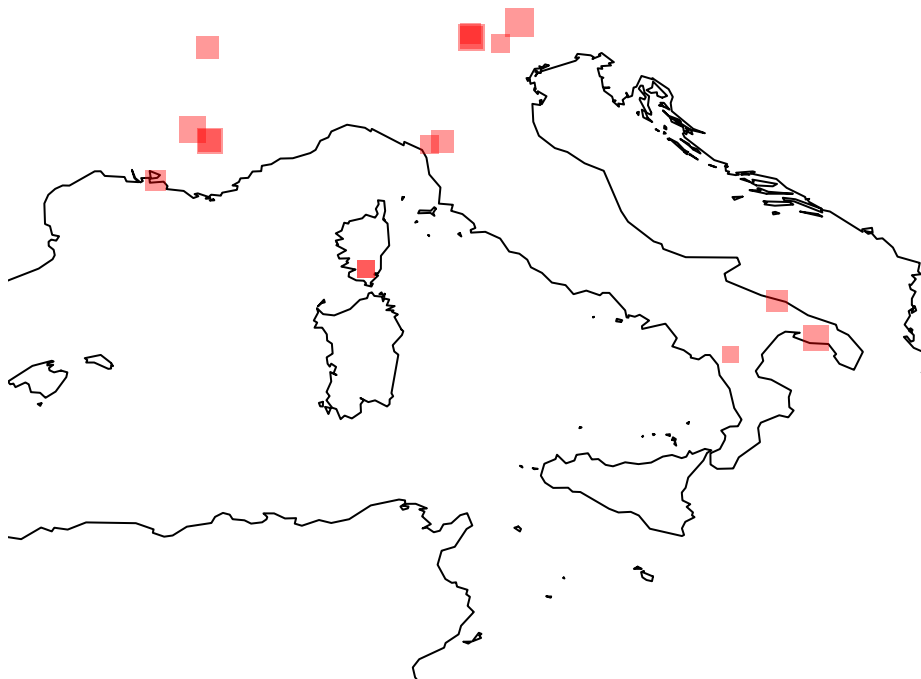

6175 cal. BC

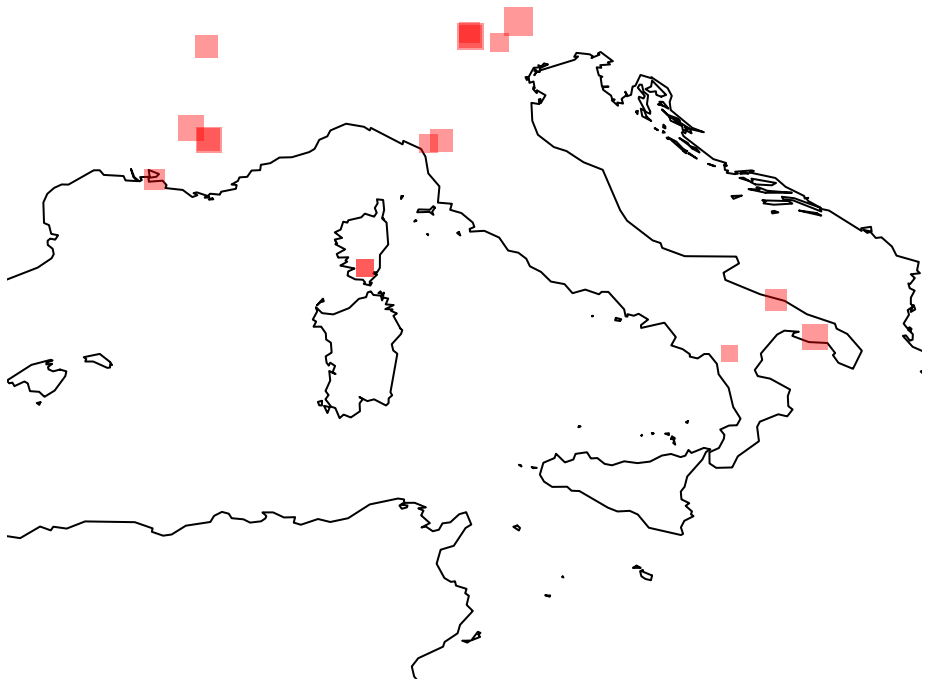

6170 cal. BC

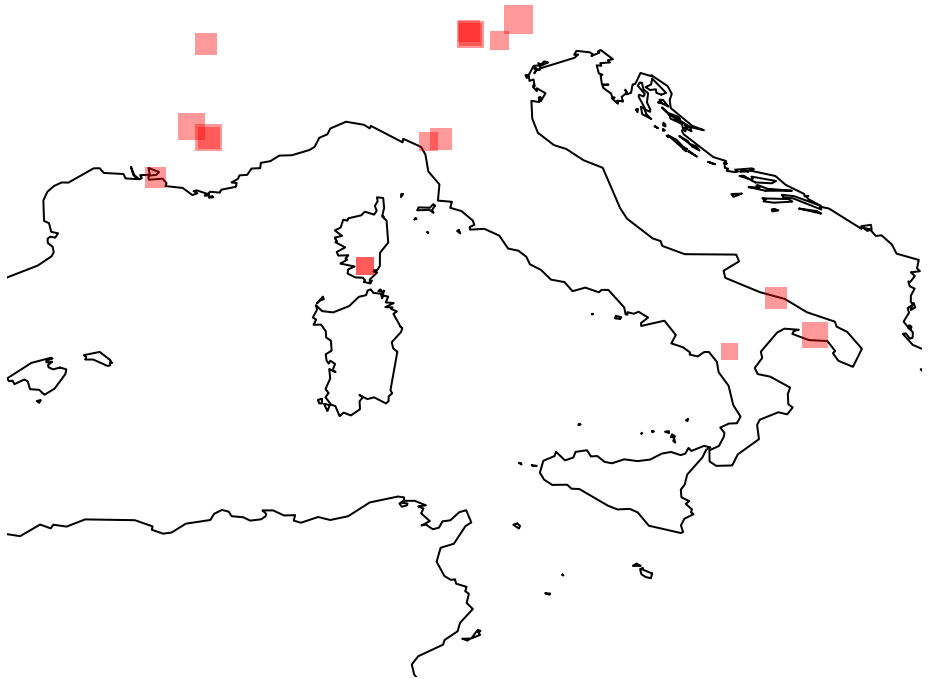



6165 cal. BC

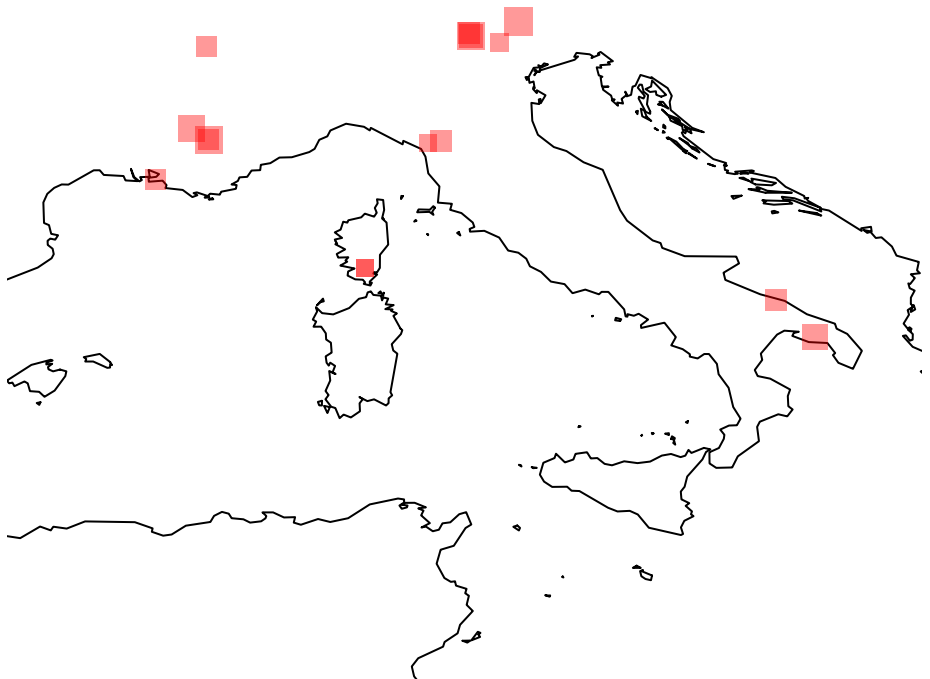



6155 cal. BC

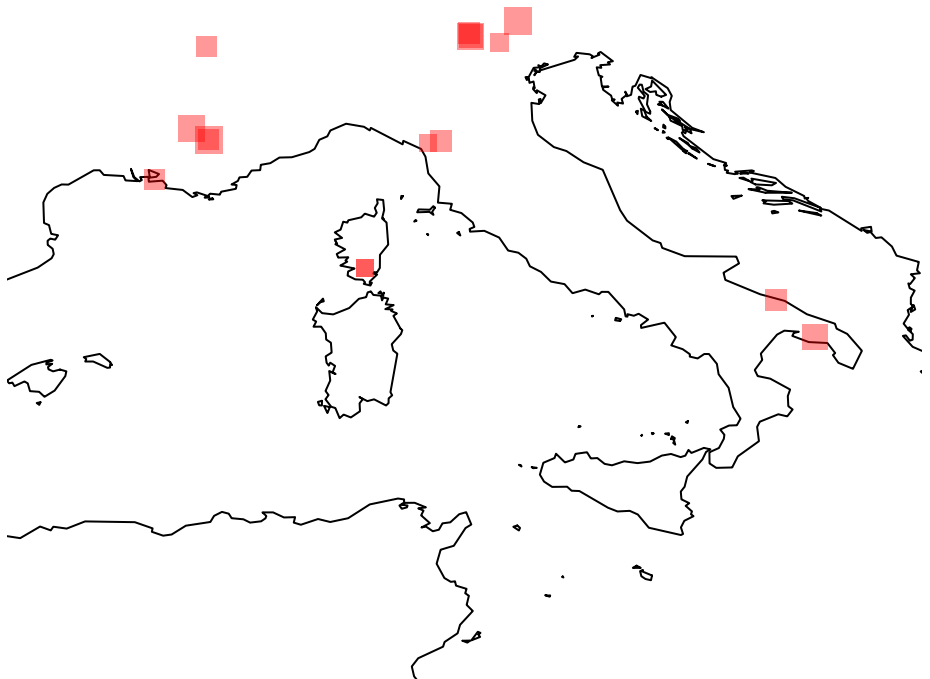

6150 cal. BC

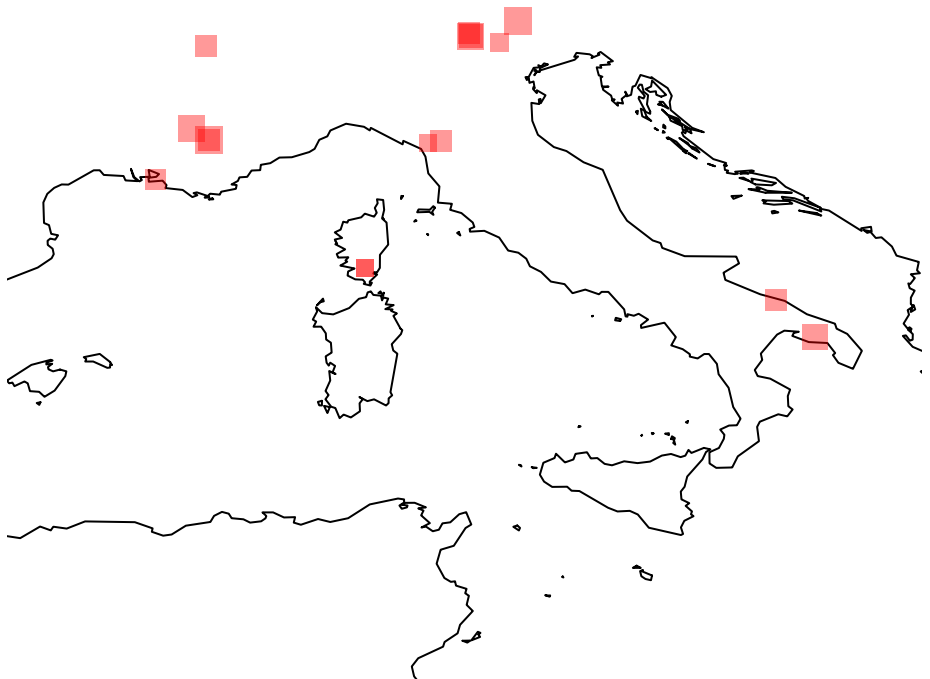

6145 cal. BC

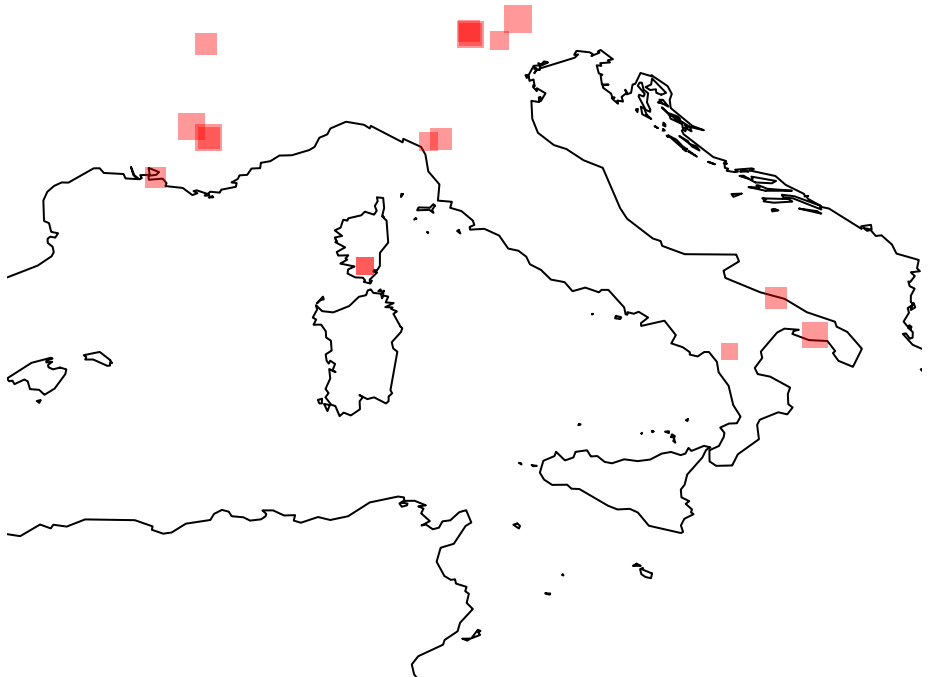

6140 cal. BC

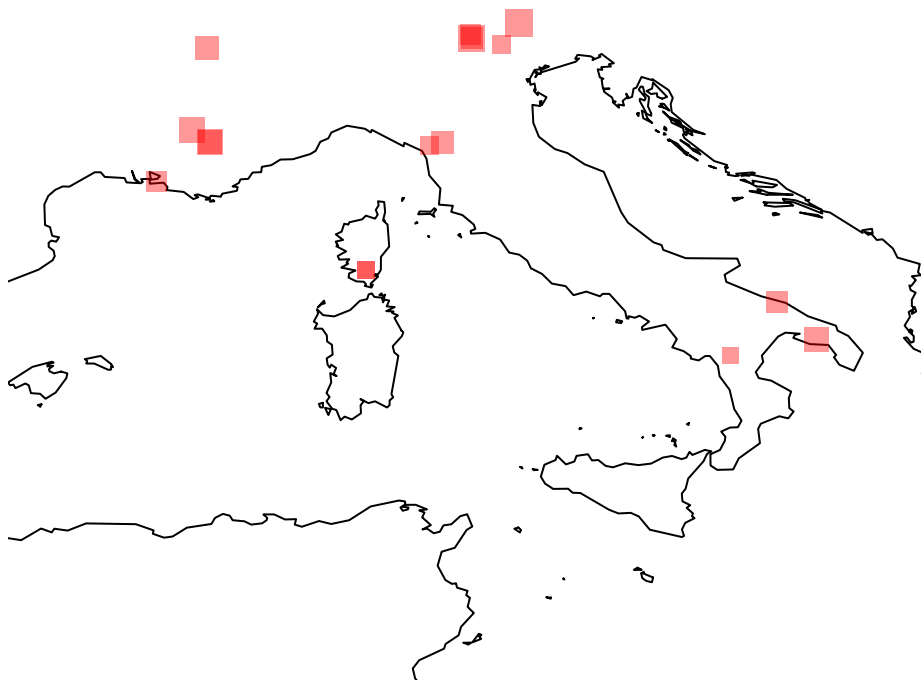

6135 cal. BC

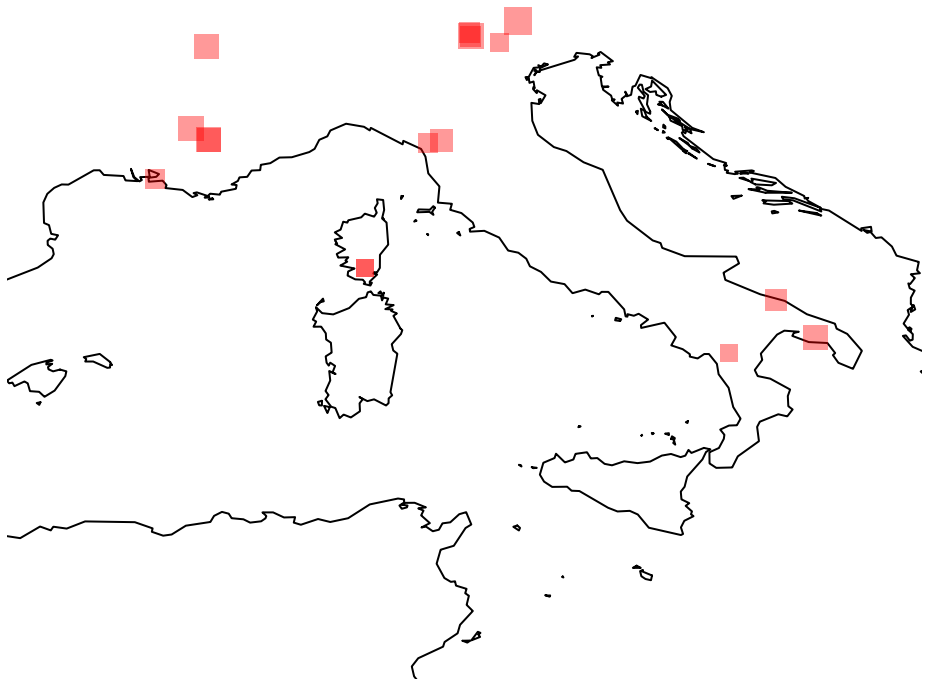

6130 cal. BC

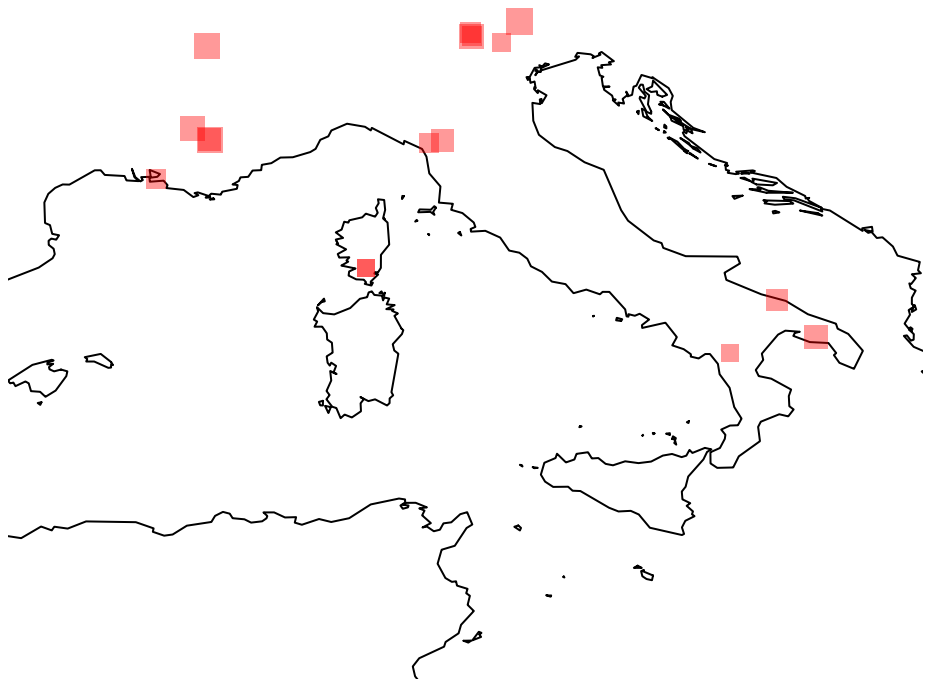



6125 cal. BC

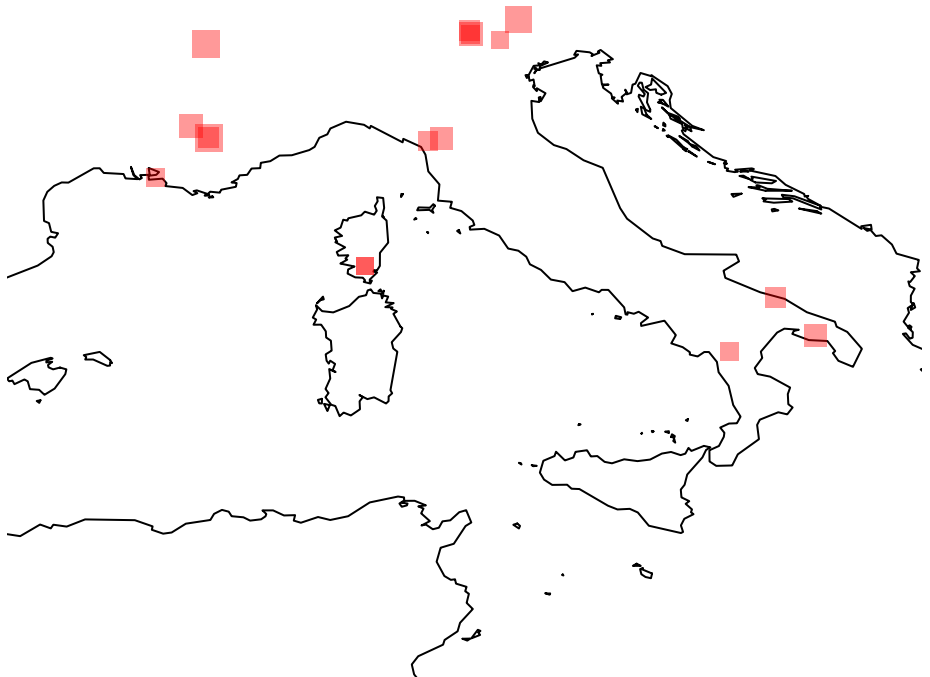

6120 cal. BC

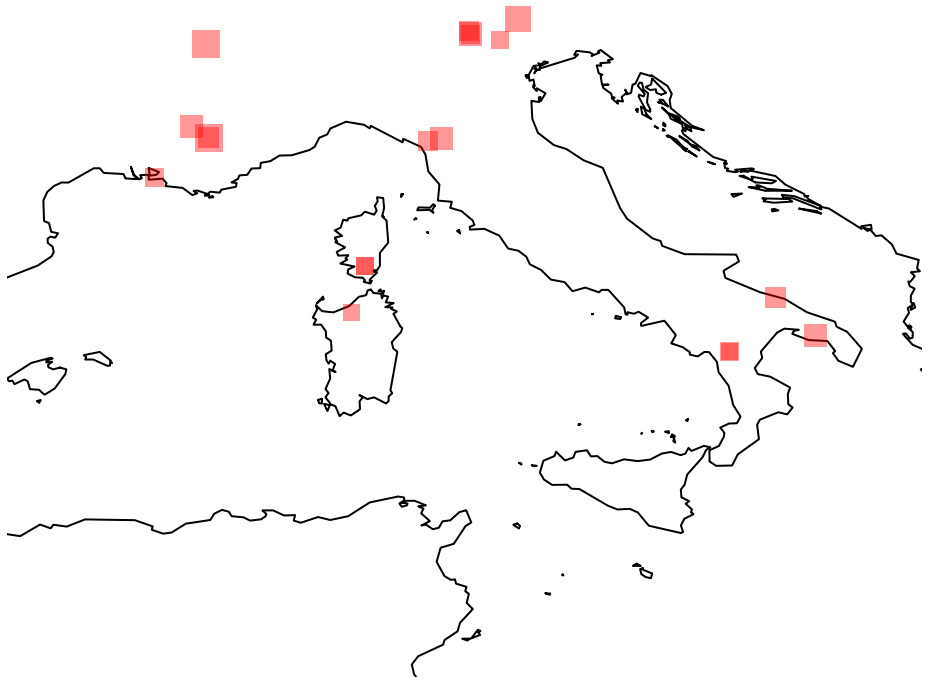

6115 cal. BC

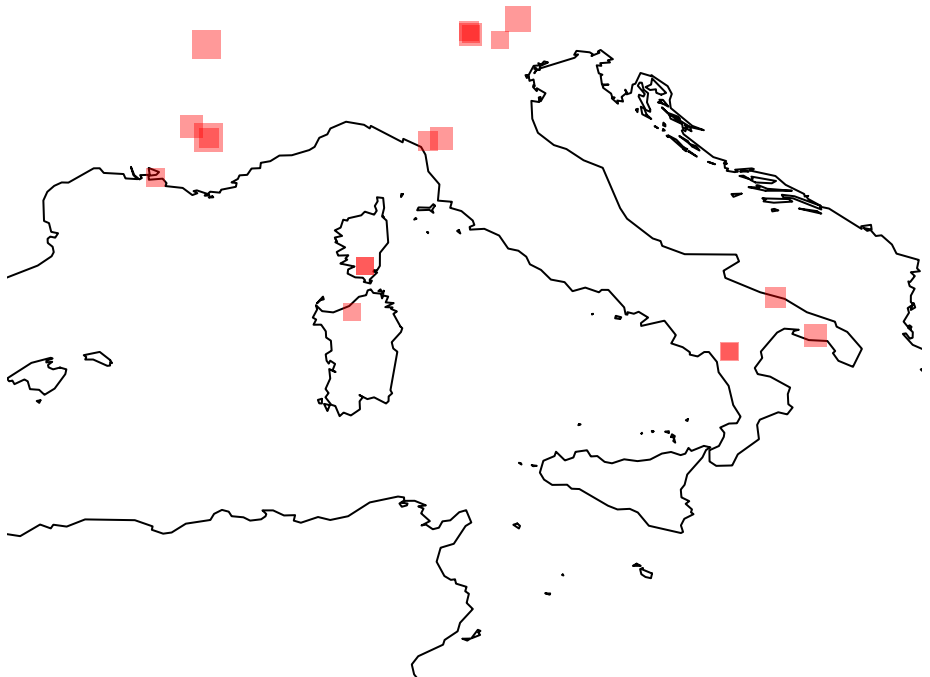



6105 cal. BC

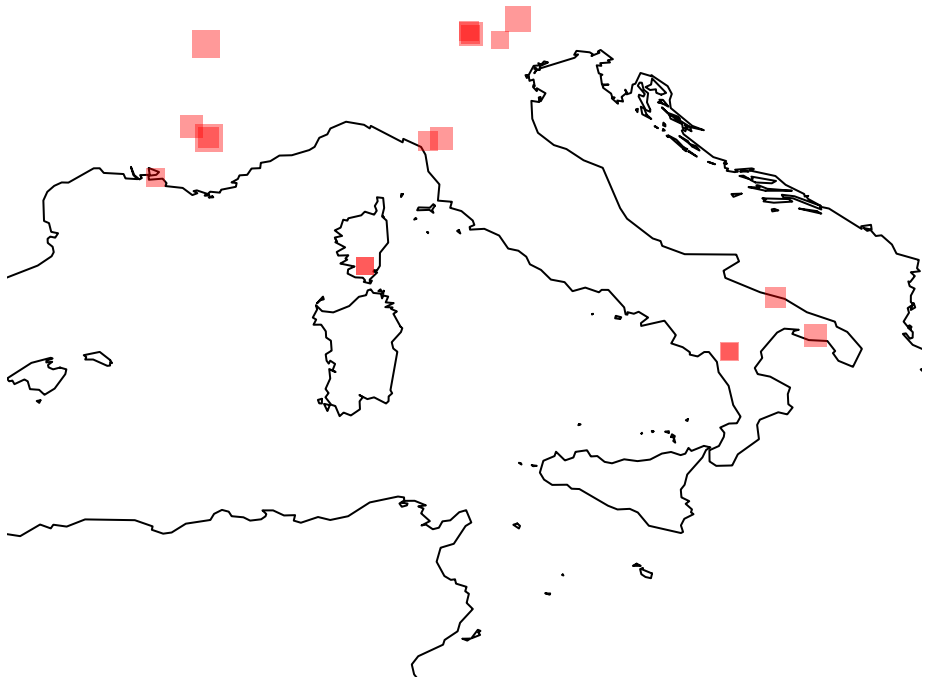

6100 cal. BC

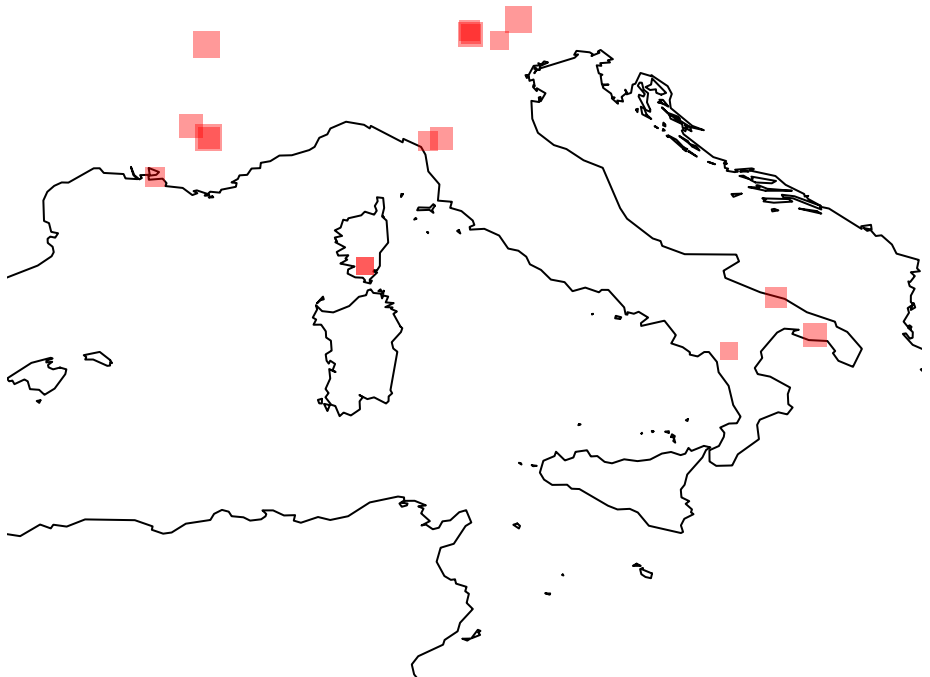

6095 cal. BC

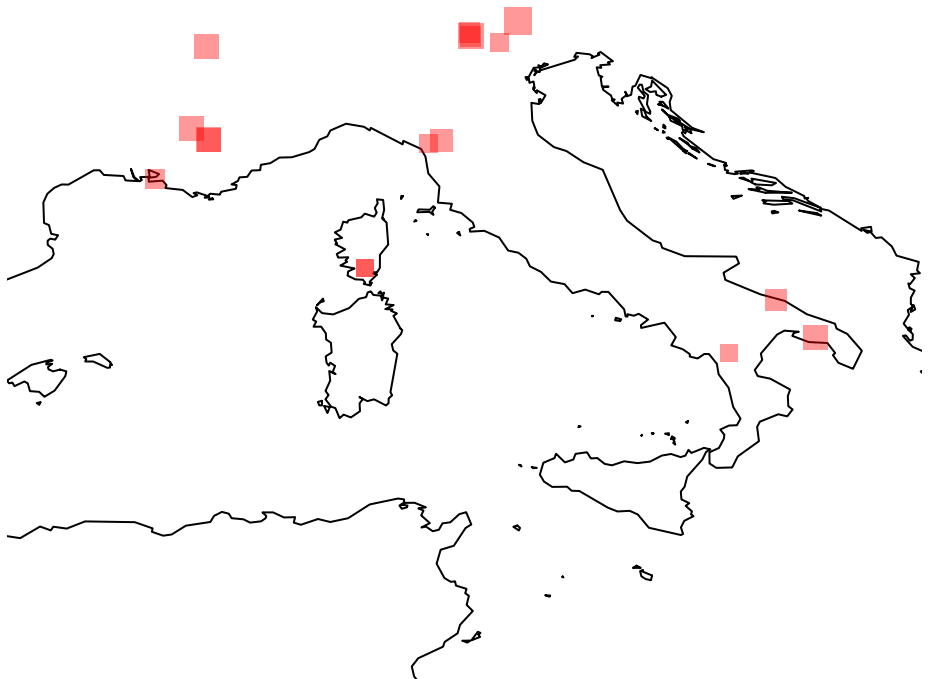

6090 cal. BC

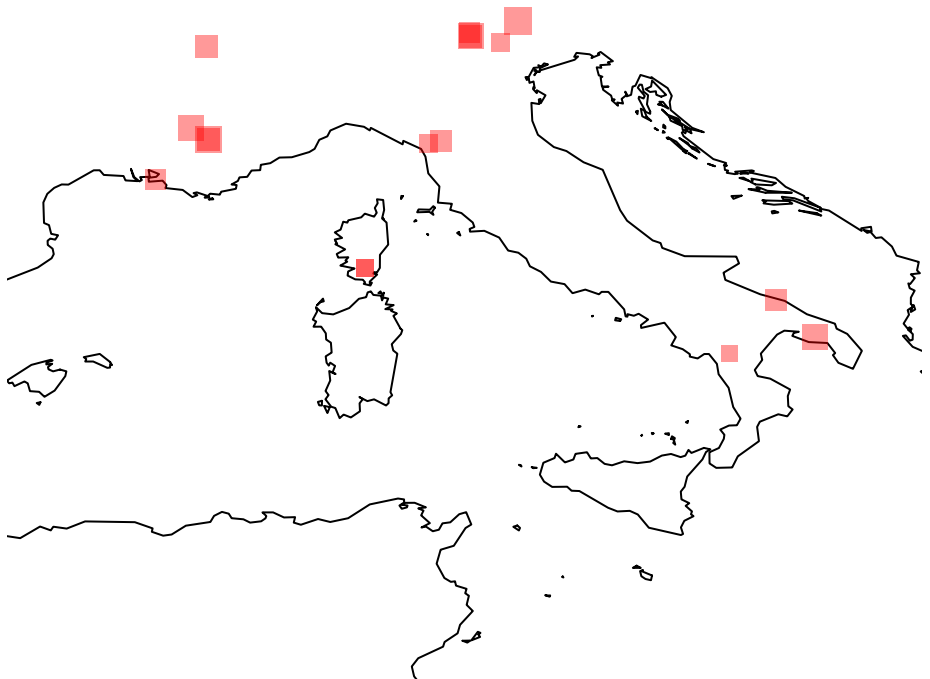



6085 cal. BC

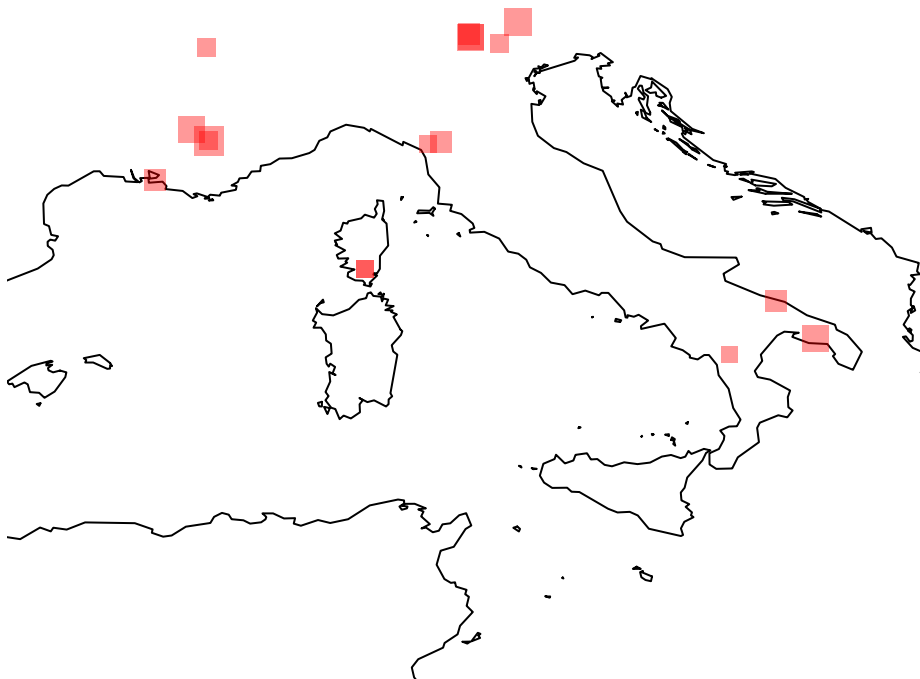

6080 cal. BC

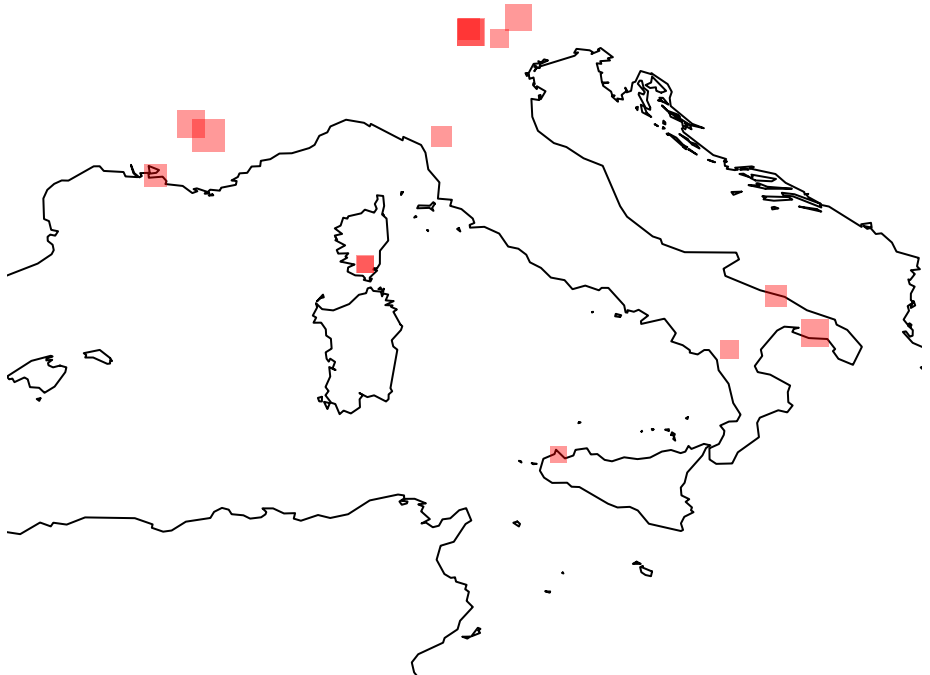

6075 cal. BC

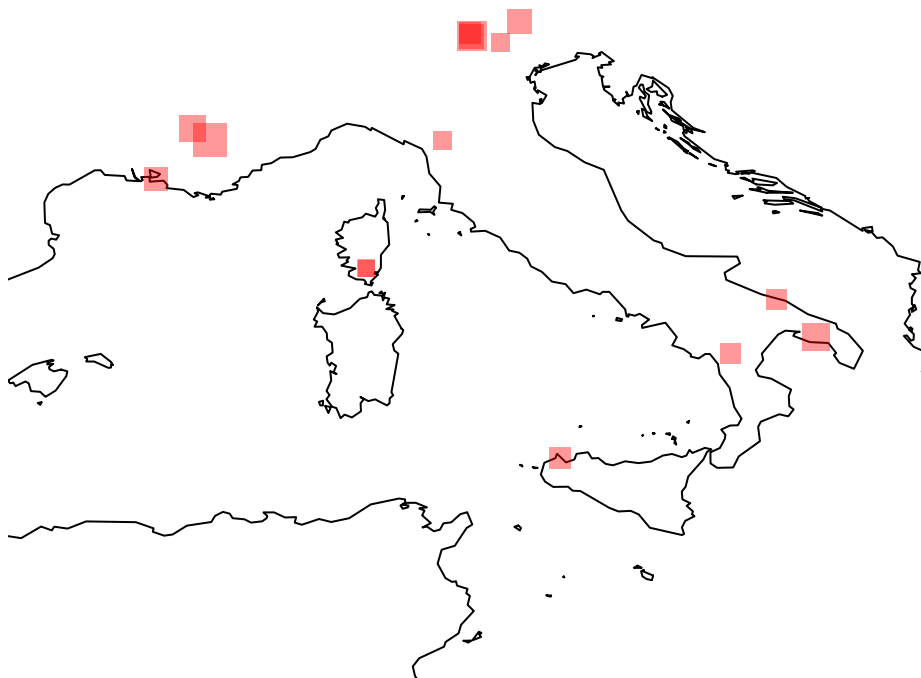



6065 cal. BC

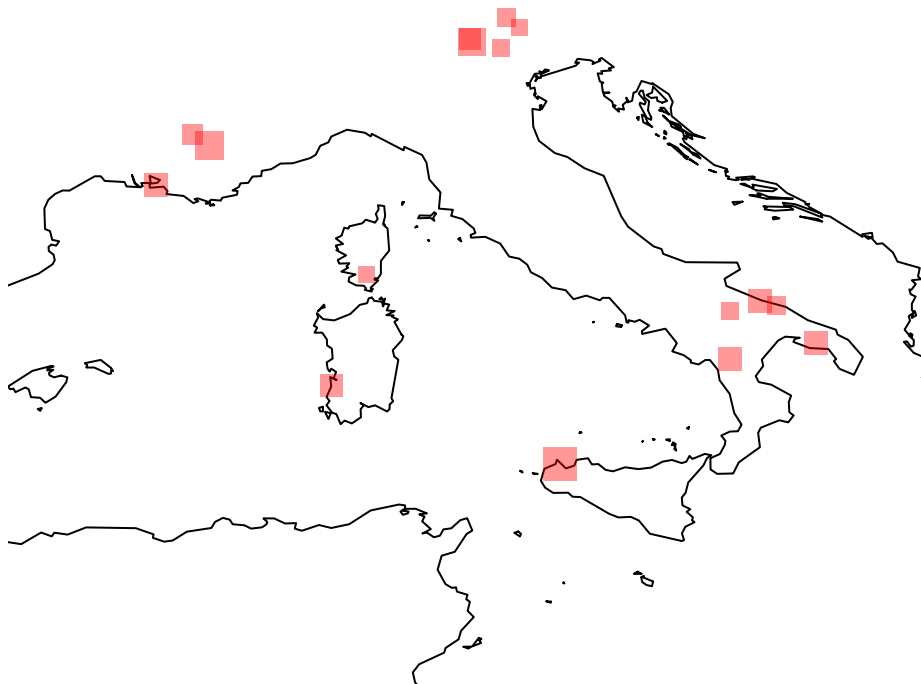

6060 cal. BC

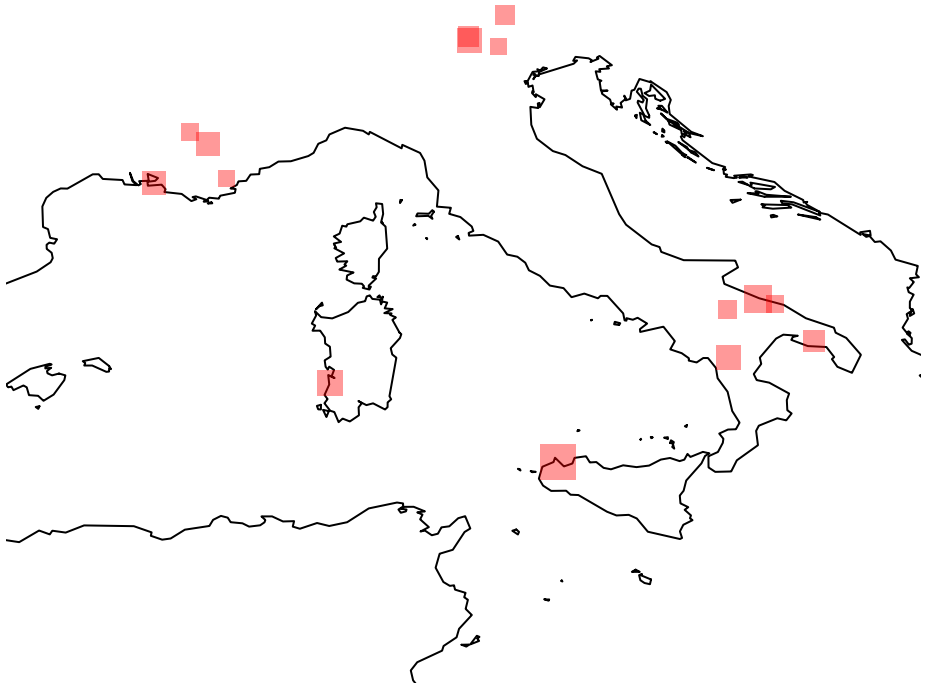

6055 cal. BC

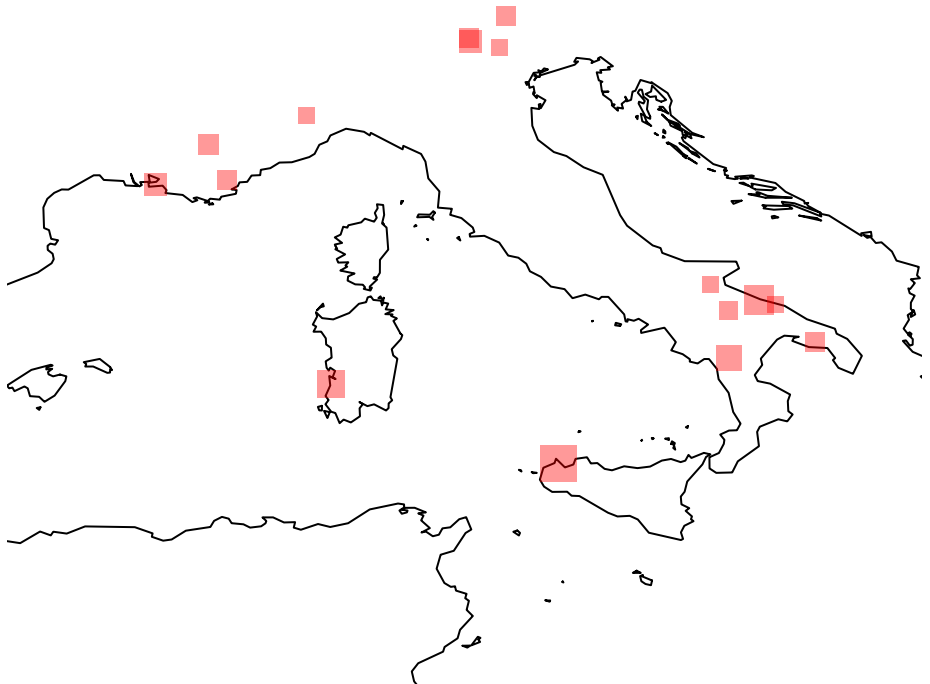

6050 cal. BC

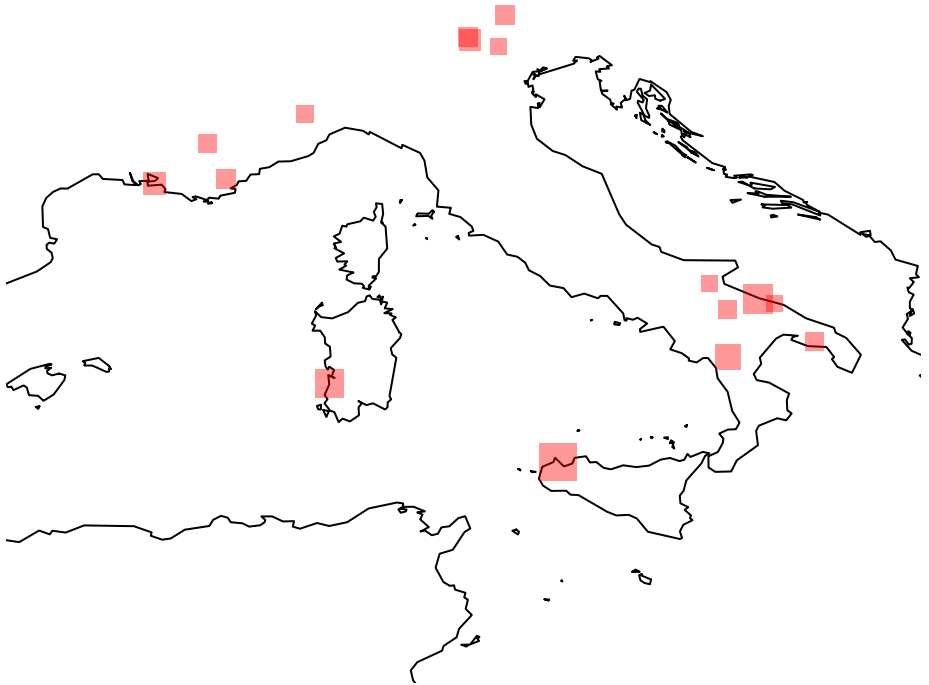



6045 cal. BC

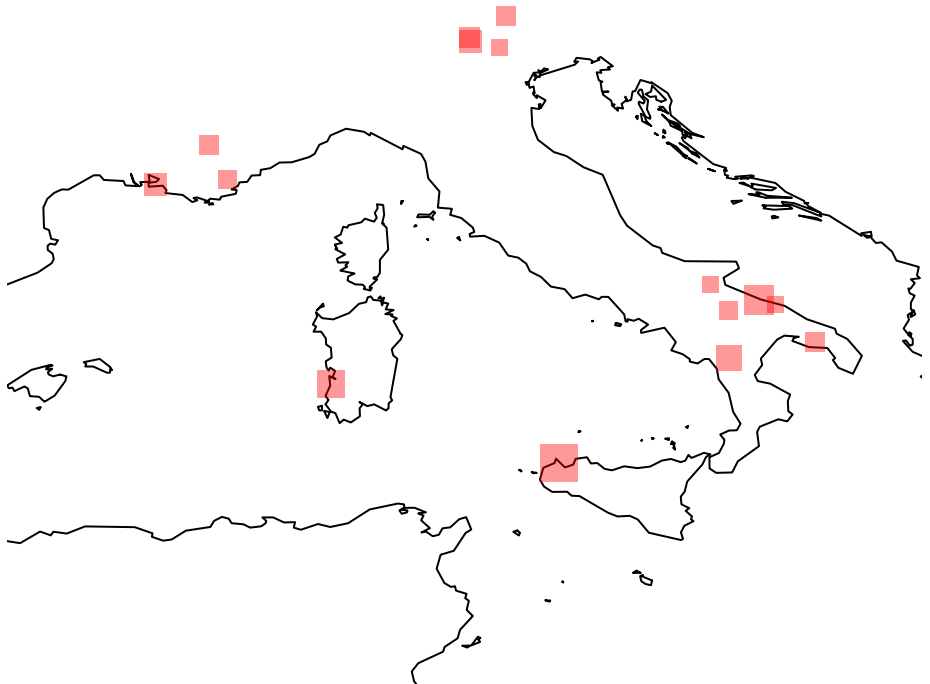

6040 cal. BC

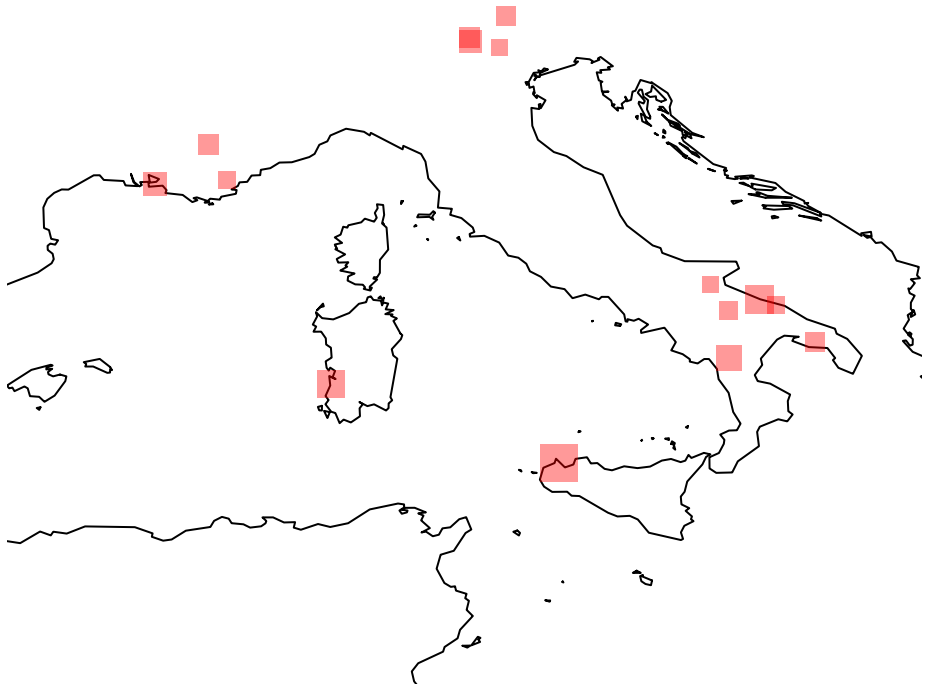

6035 cal. BC

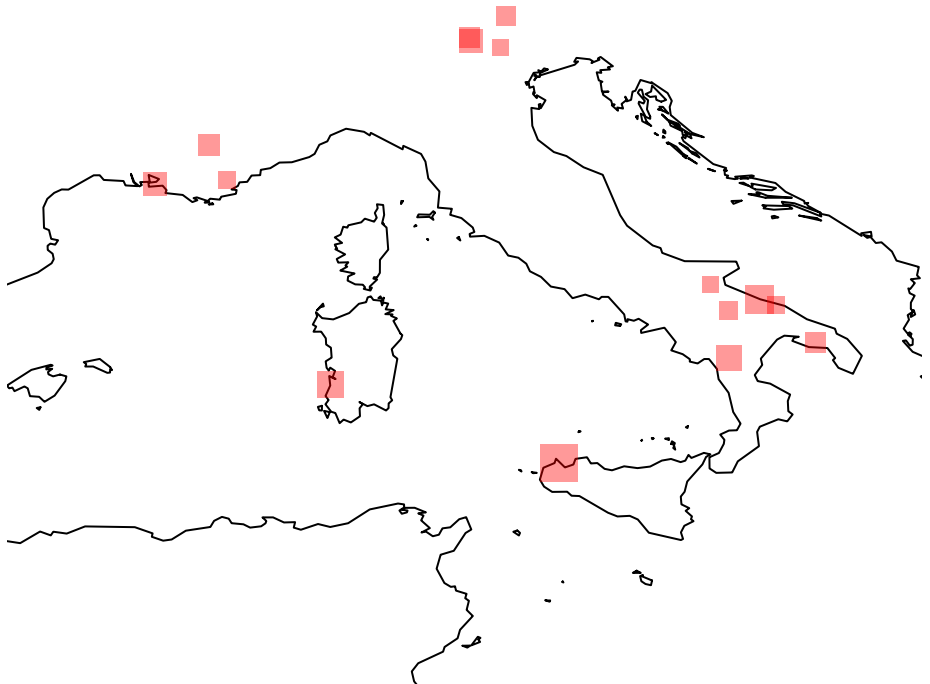



6025 cal. BC

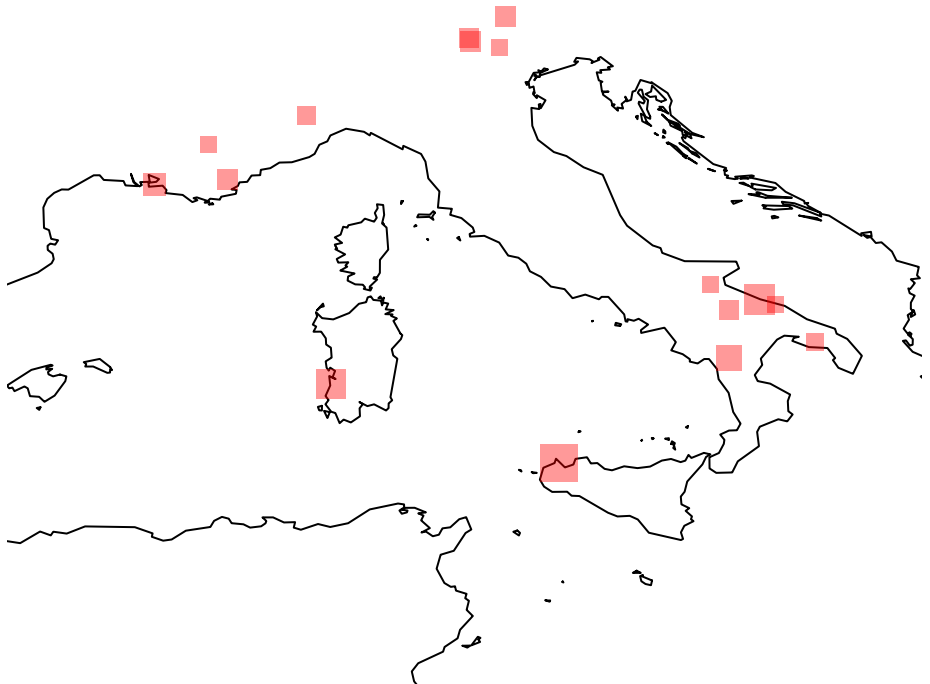

6020 cal. BC

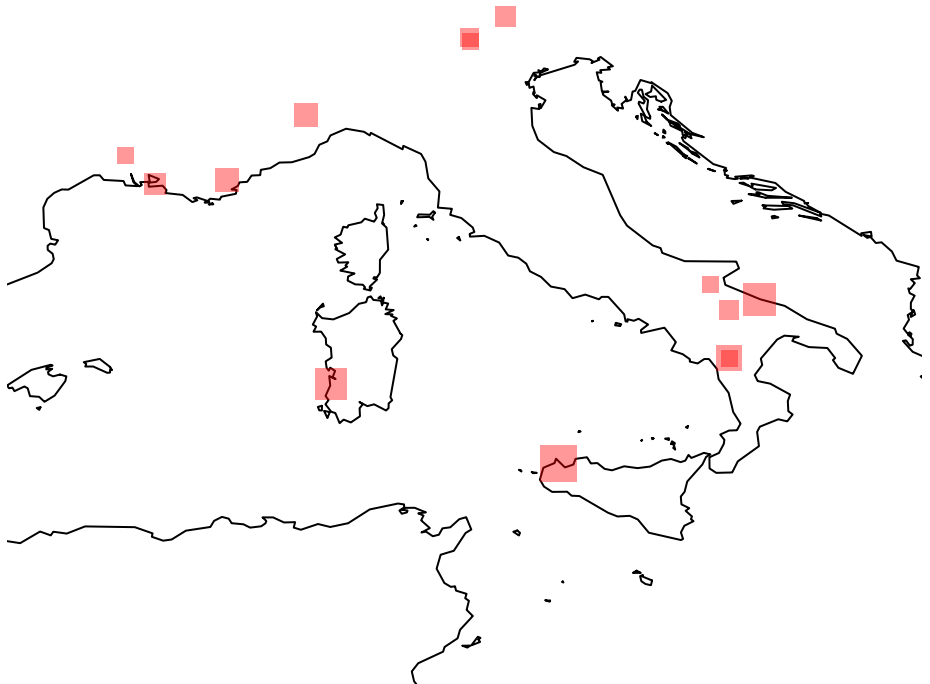







6005 cal. BC

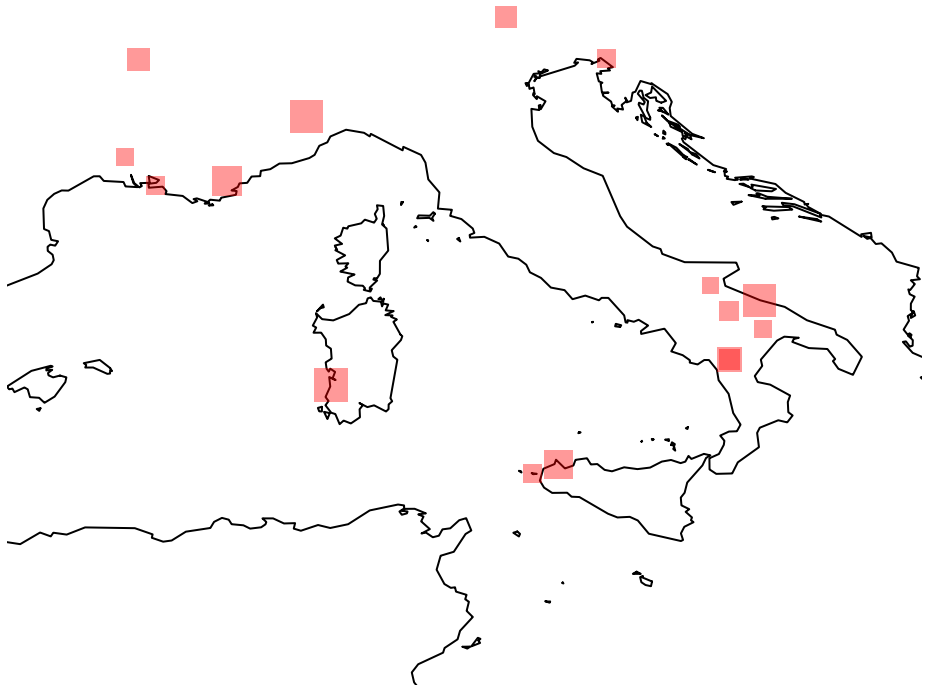

6000 cal. BC

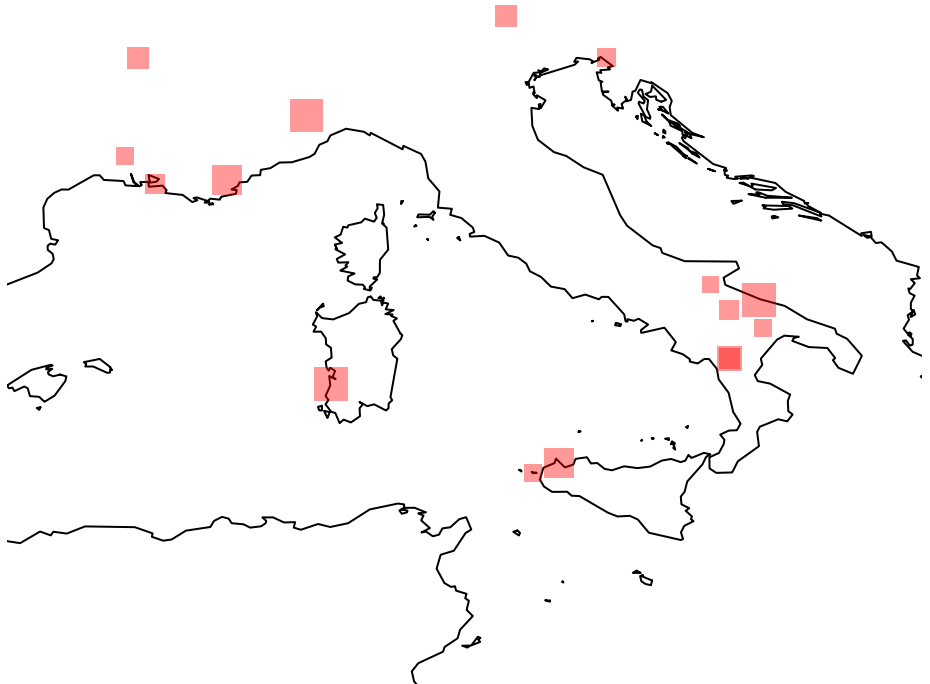

5995 cal. BC

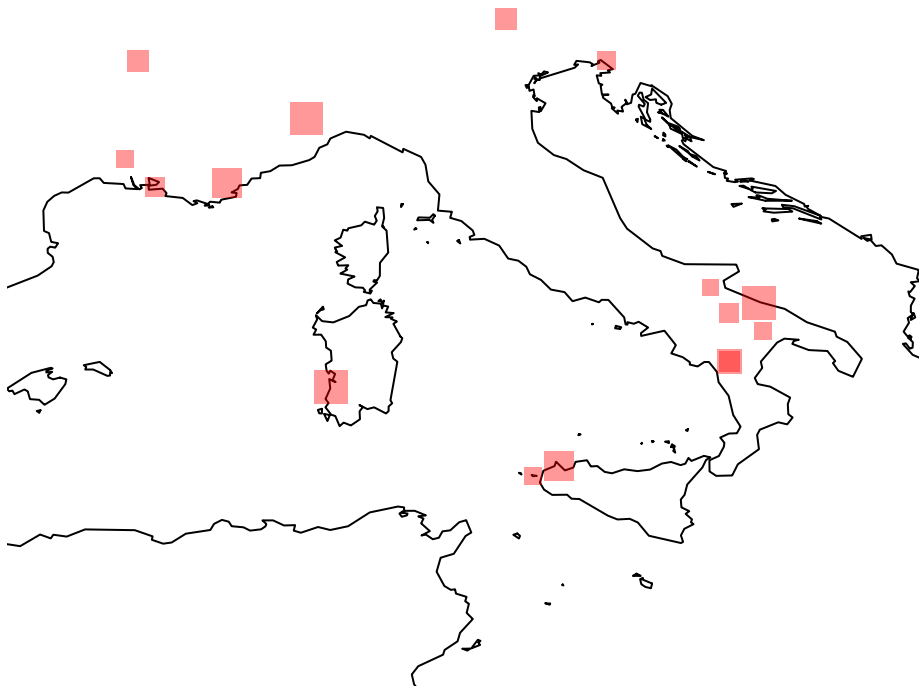

**5990 cal. BC**

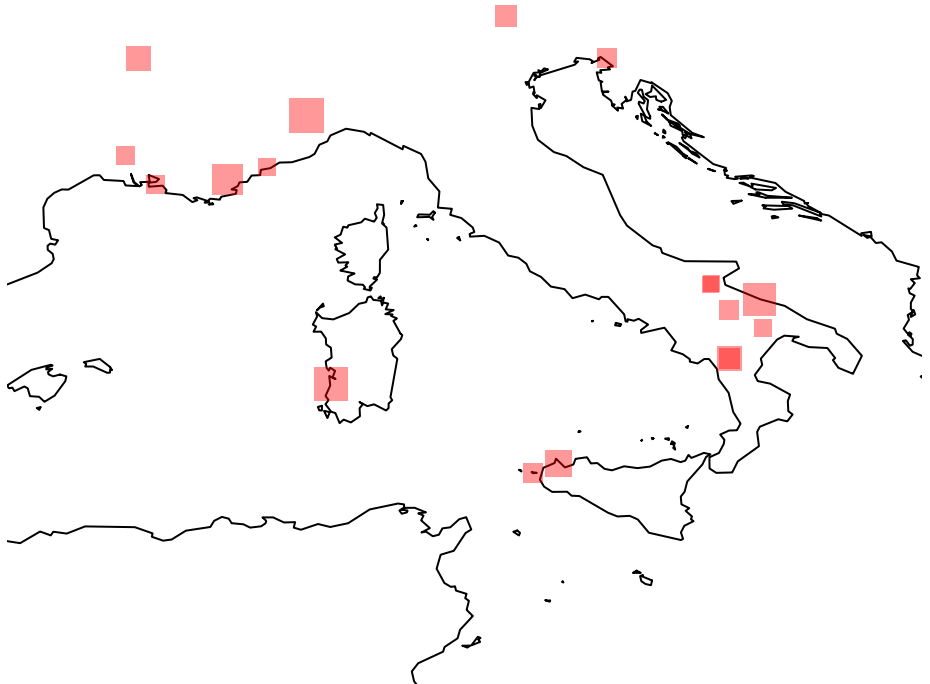

5985 cal. BC

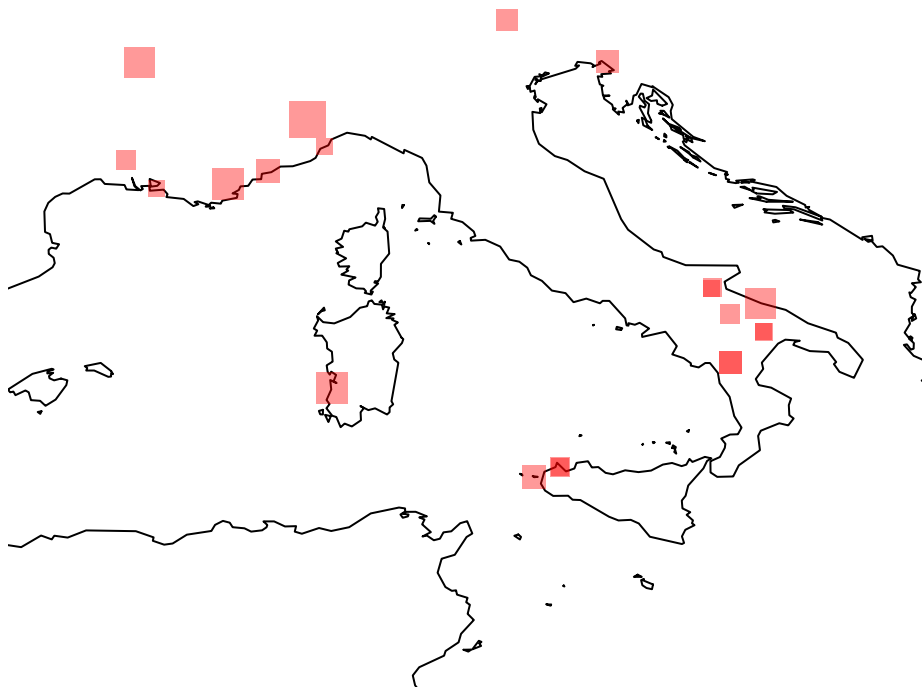



**5975 cal. BC**

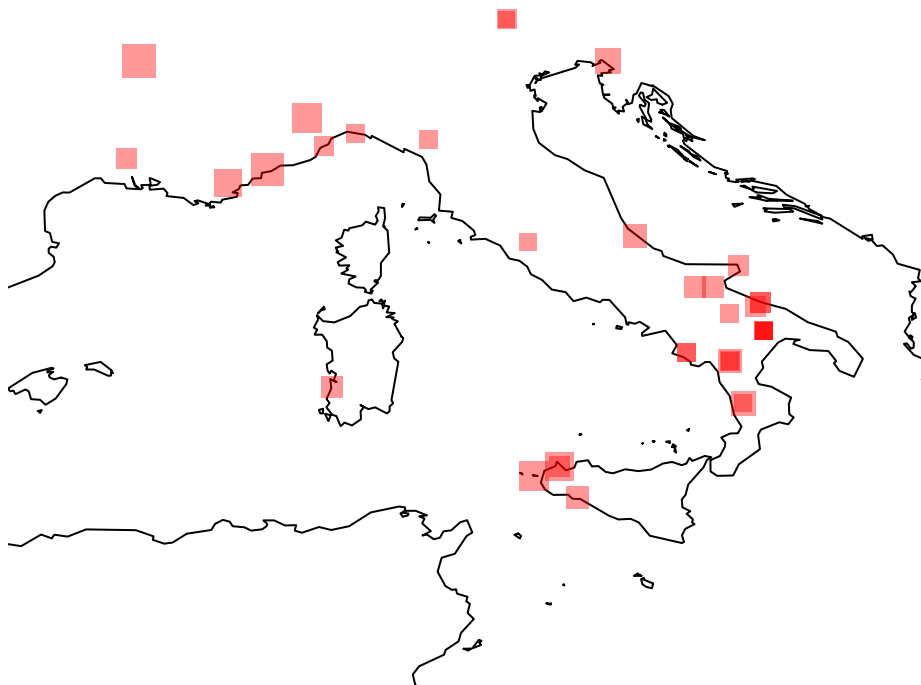

5970 cal. BC

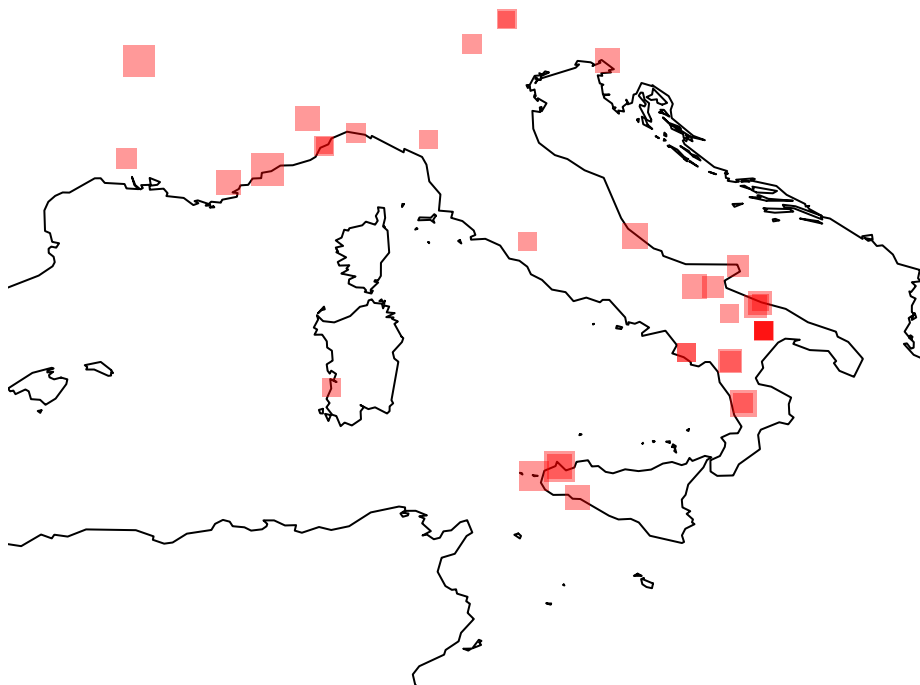



5965 cal. BC

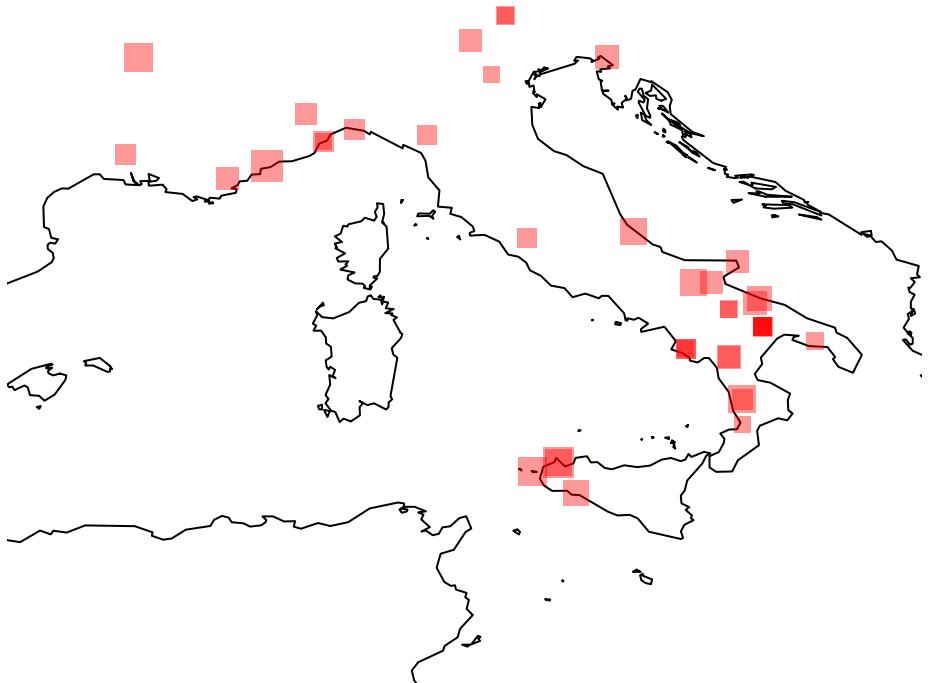

5960 cal. BC

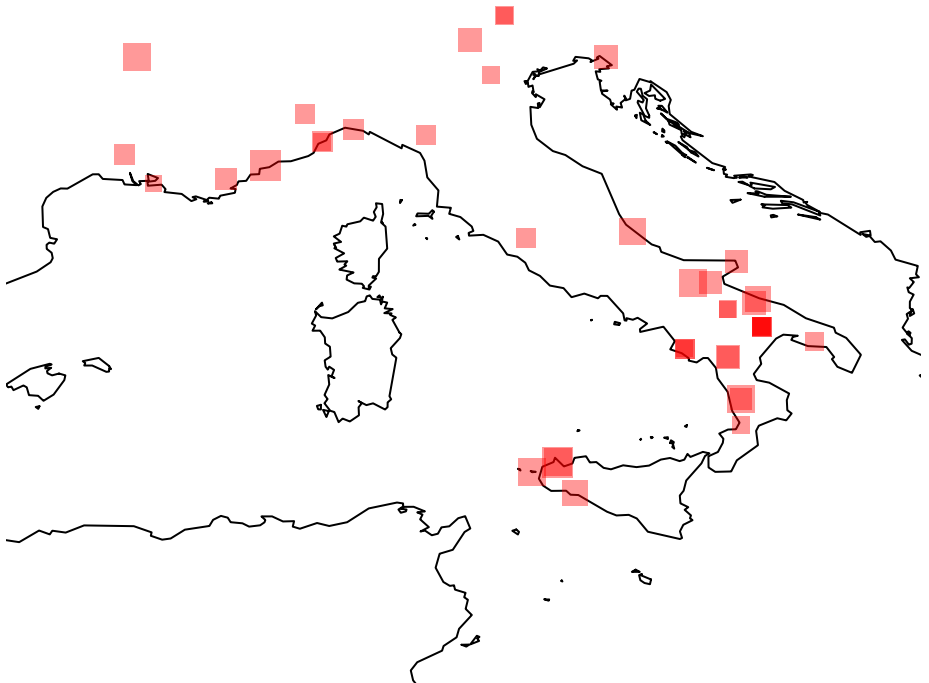

5955 cal. BC

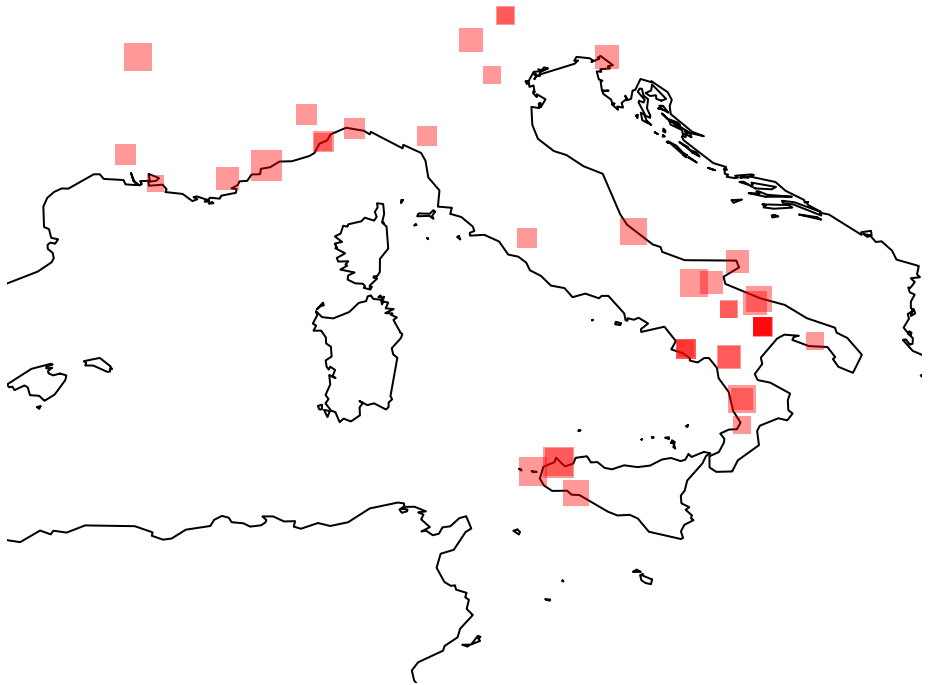

5950 cal. BC

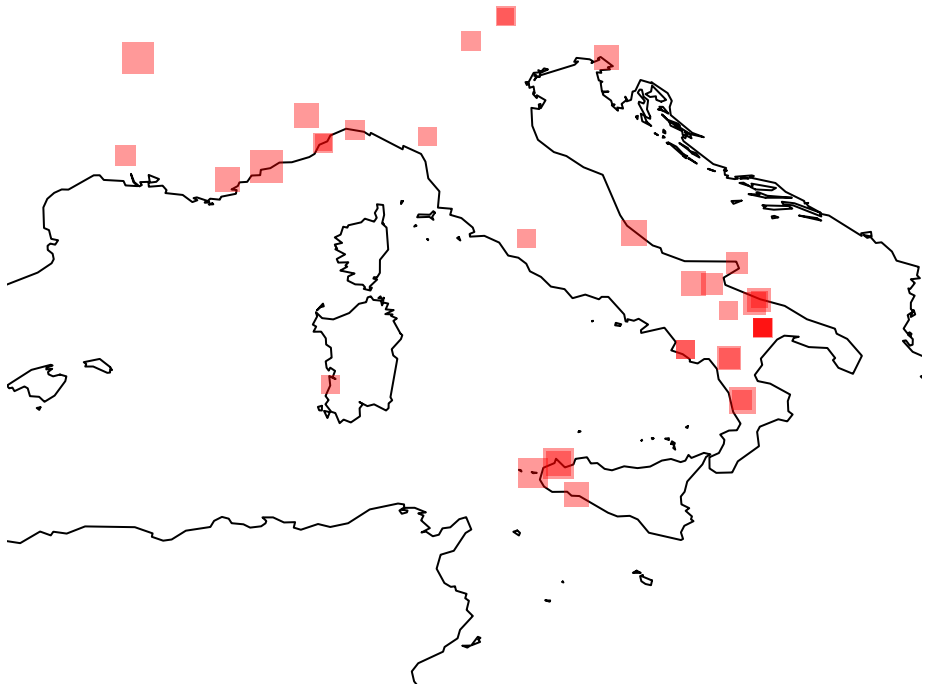

5945 cal. BC

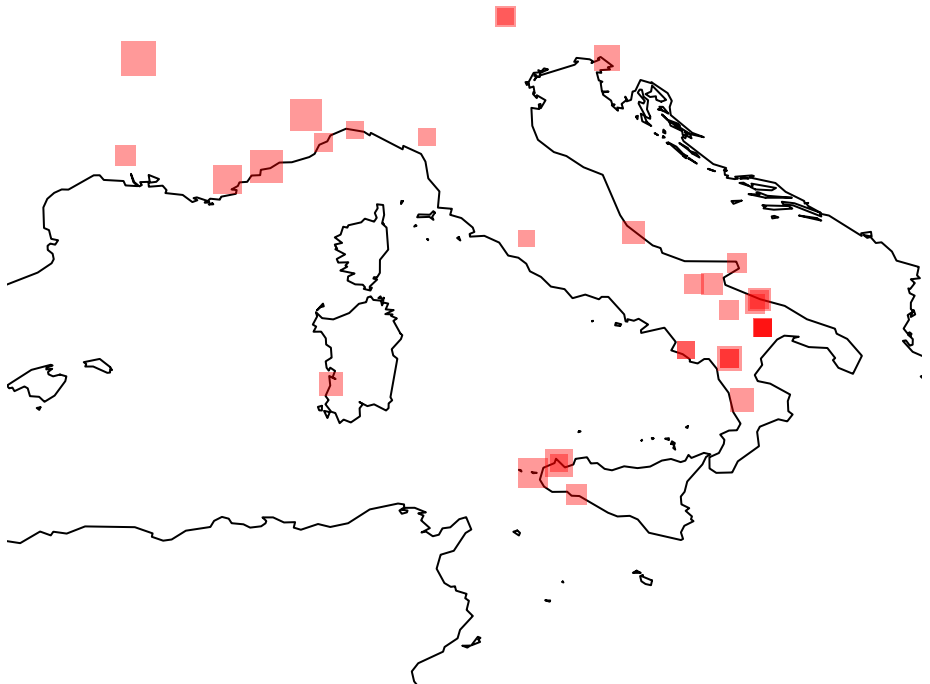















5910 cal. BC

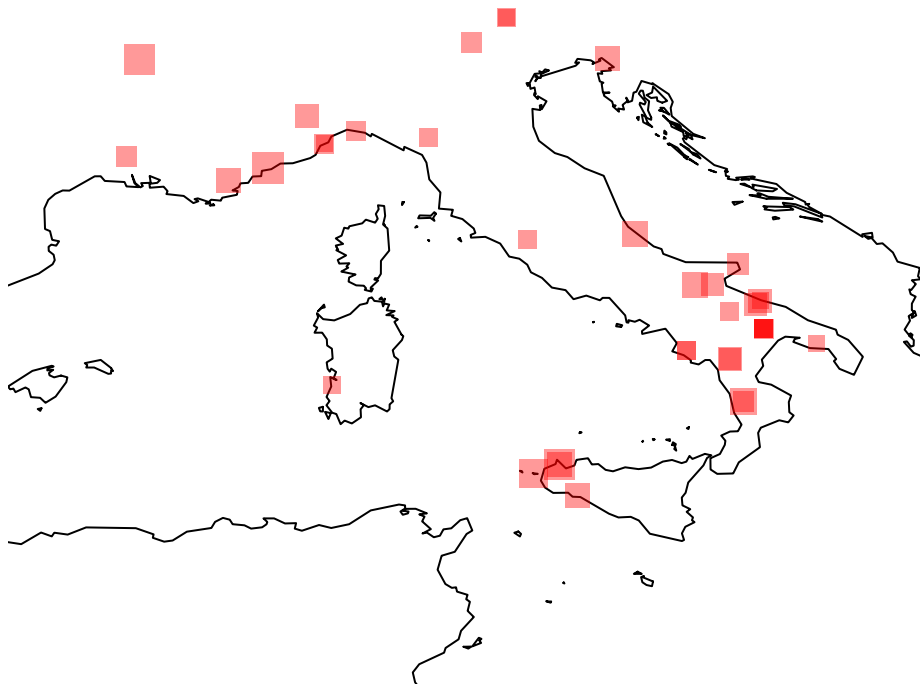

5905 cal. BC

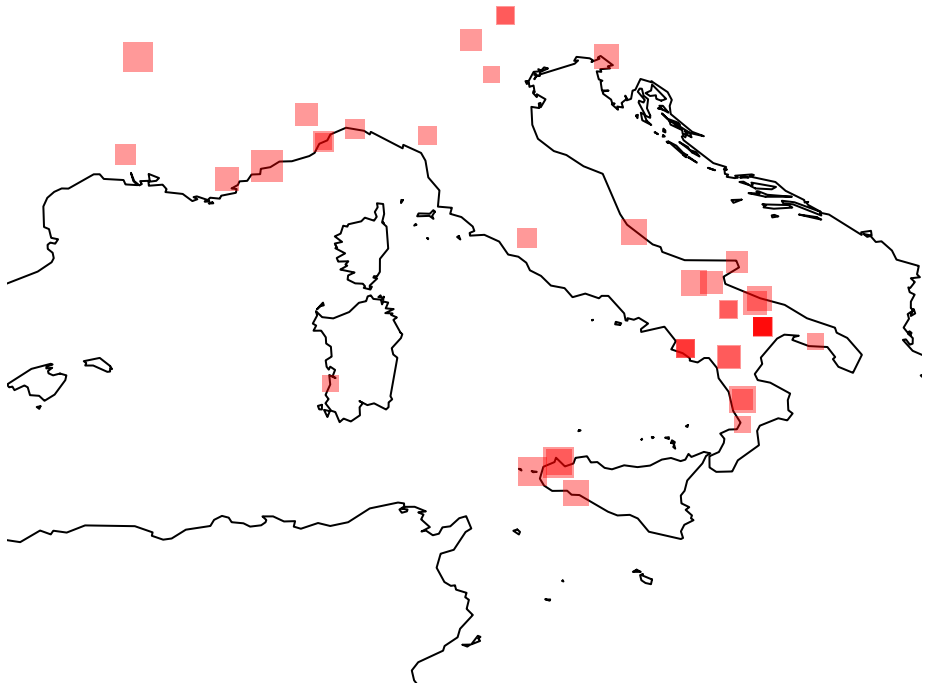

5900 cal. BC

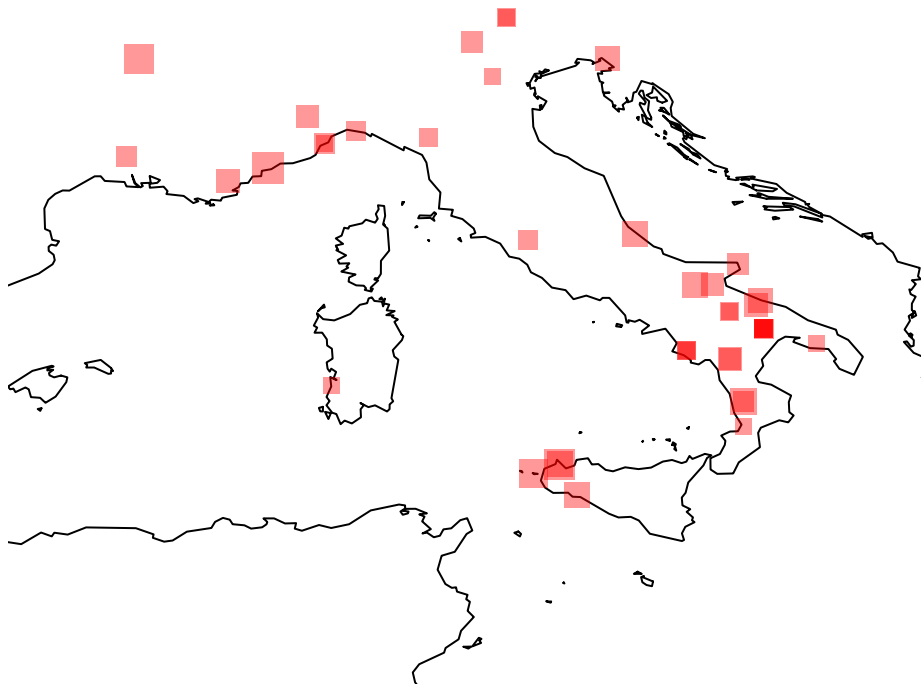

**5895 cal. BC**

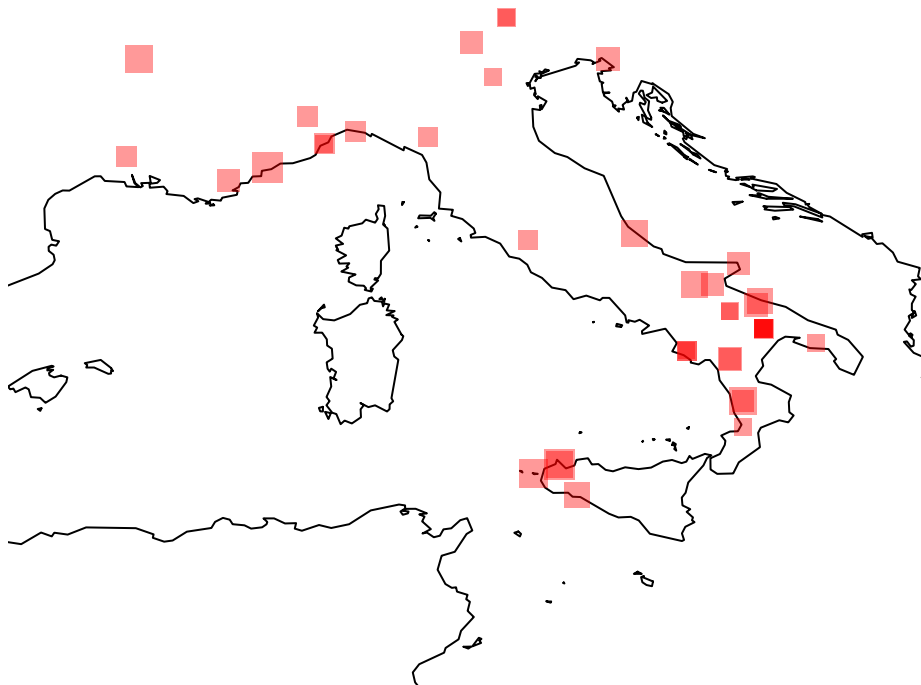





5885 cal. BC

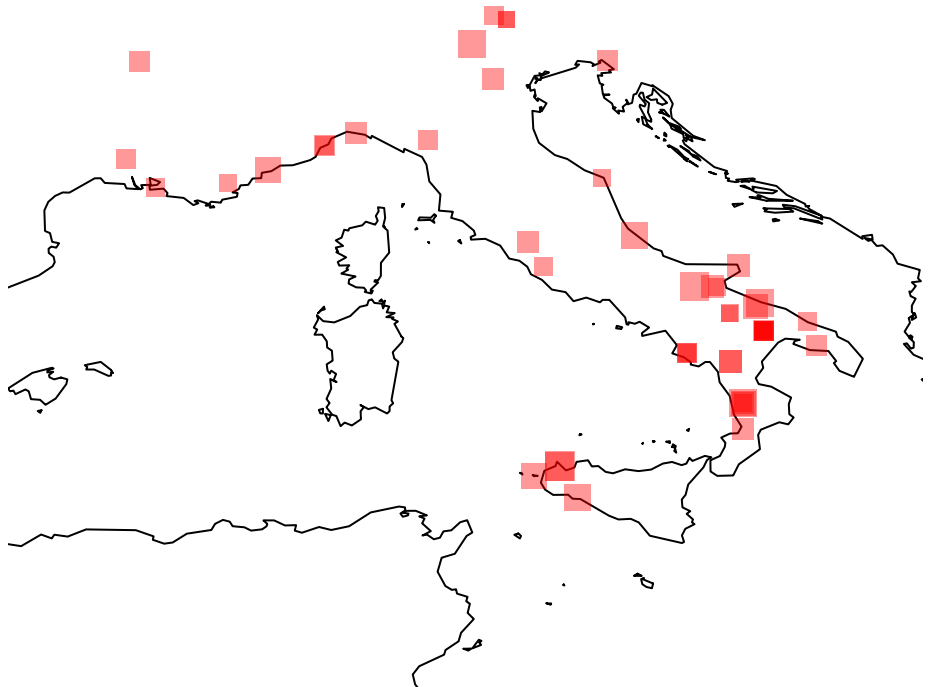



5875 cal. BC

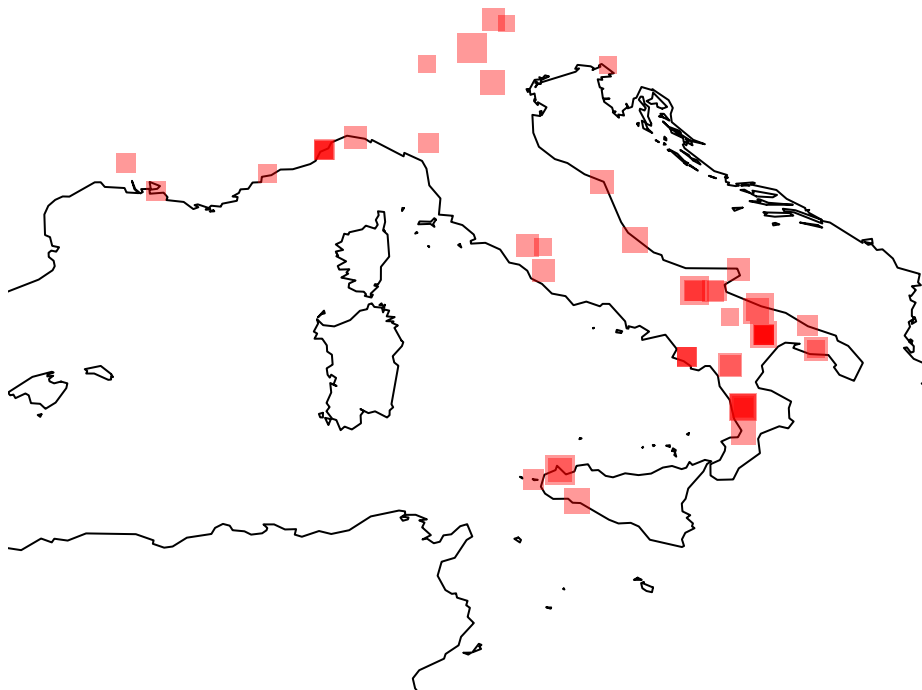



5865 cal. BC

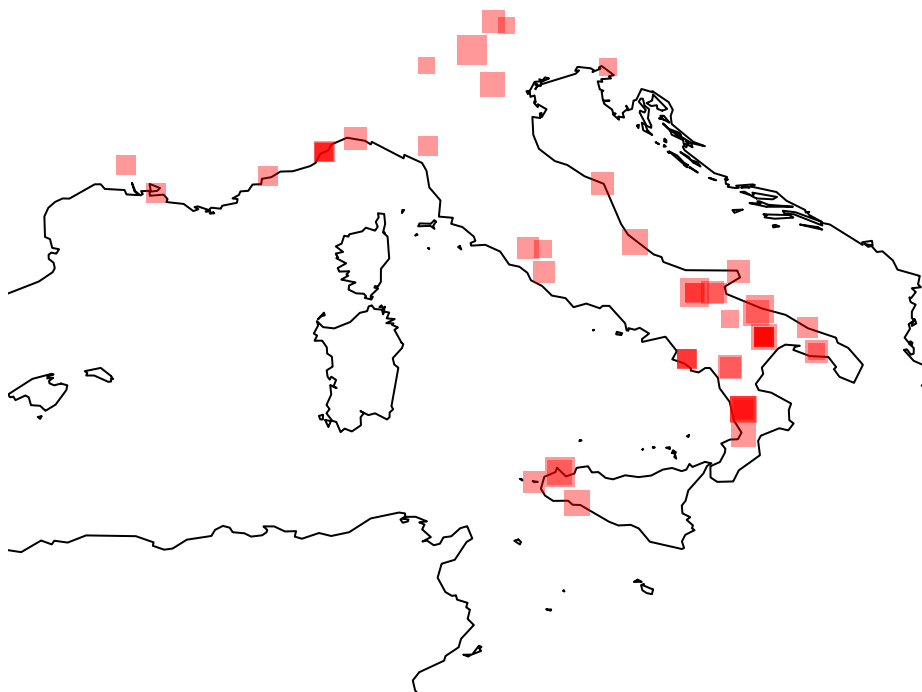

5860 cal. BC

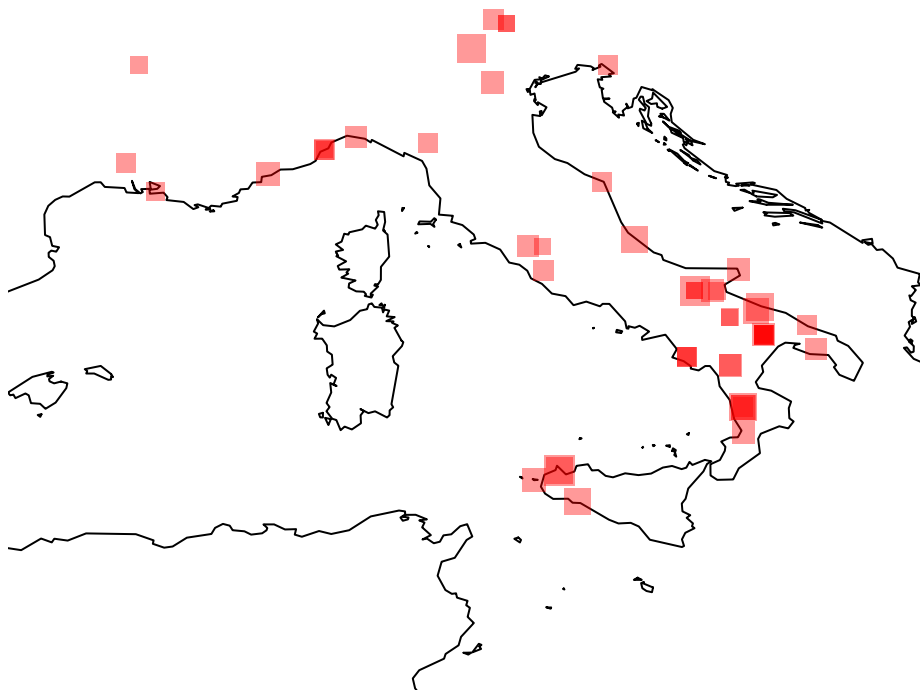

5855 cal. BC

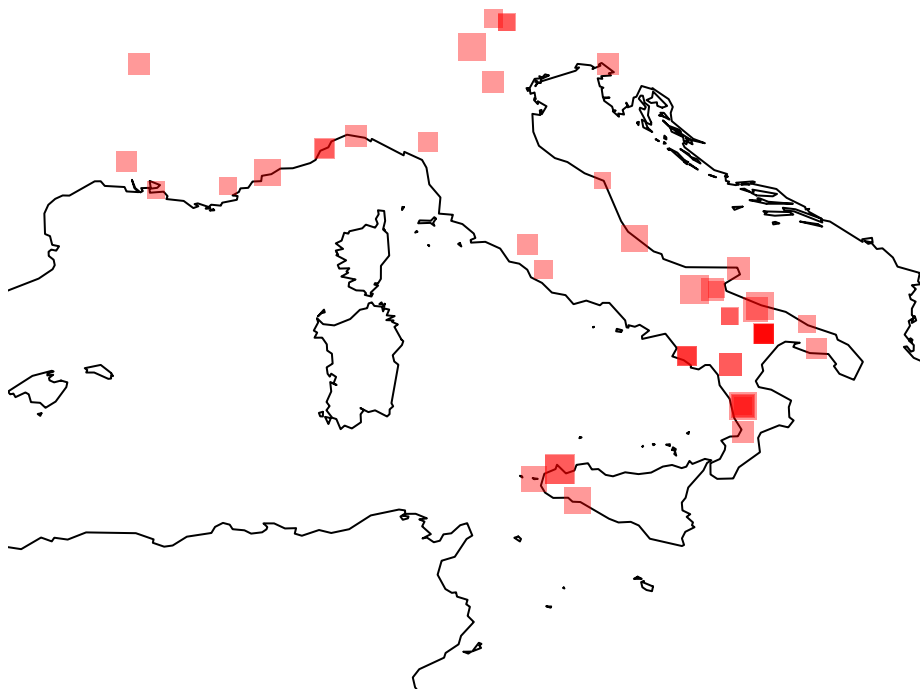





5845 cal. BC

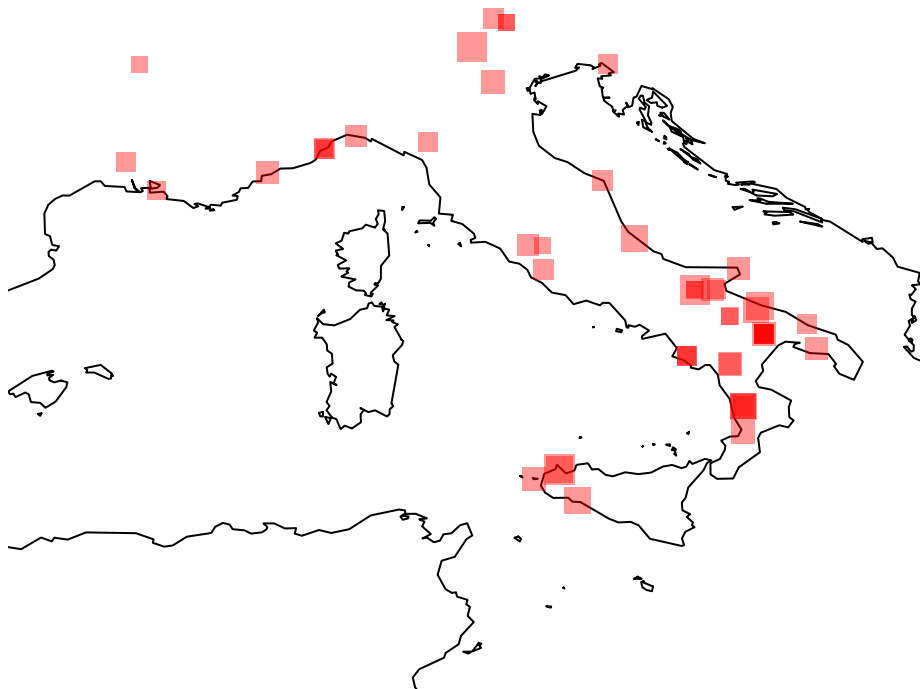

5840 cal. BC

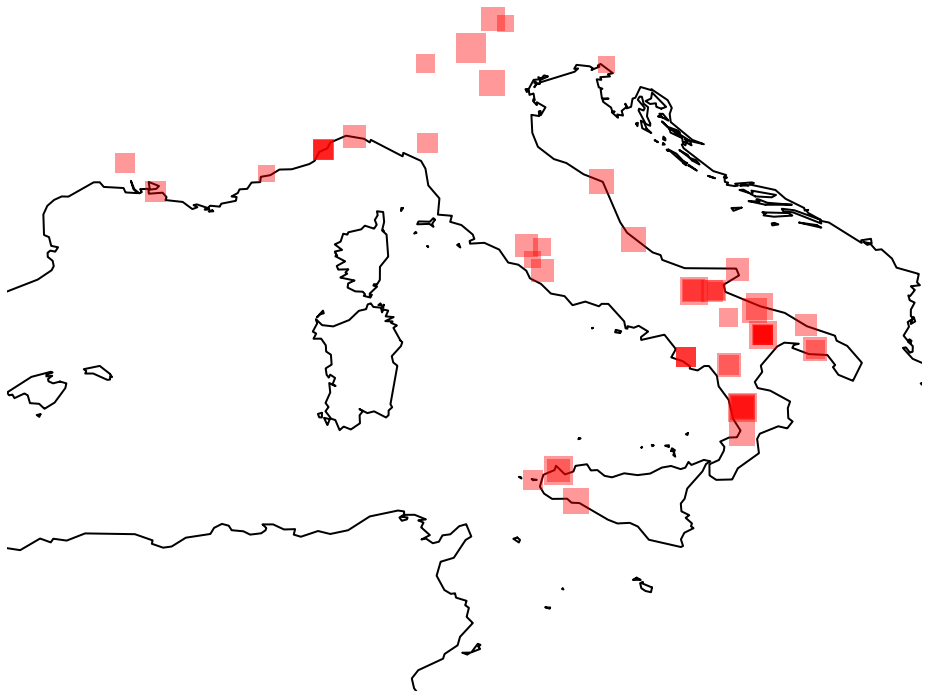

5835 cal. BC

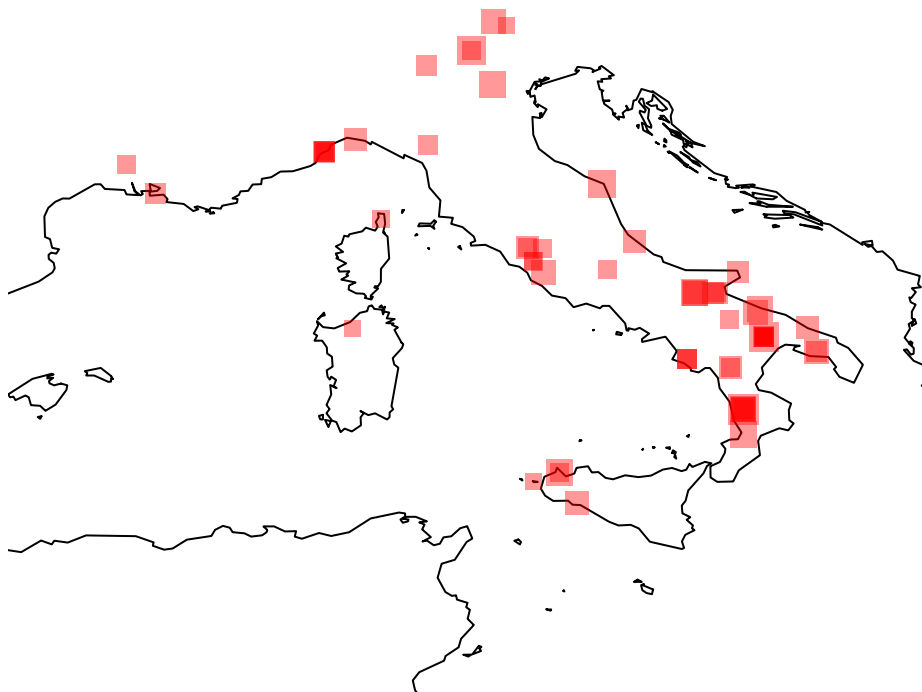

5830 cal. BC

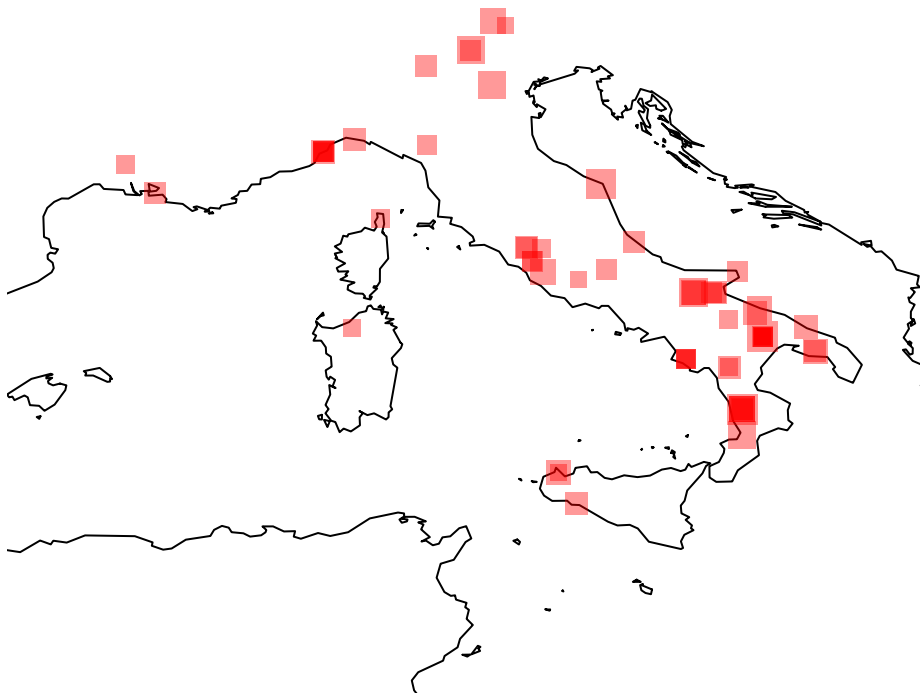

5825 cal. BC

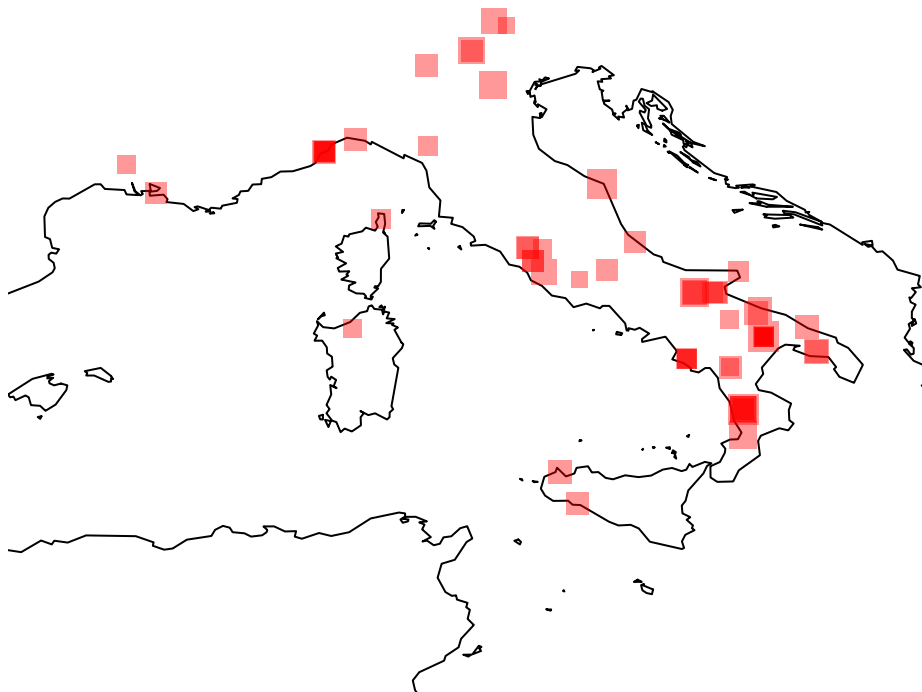

5820 cal. BC

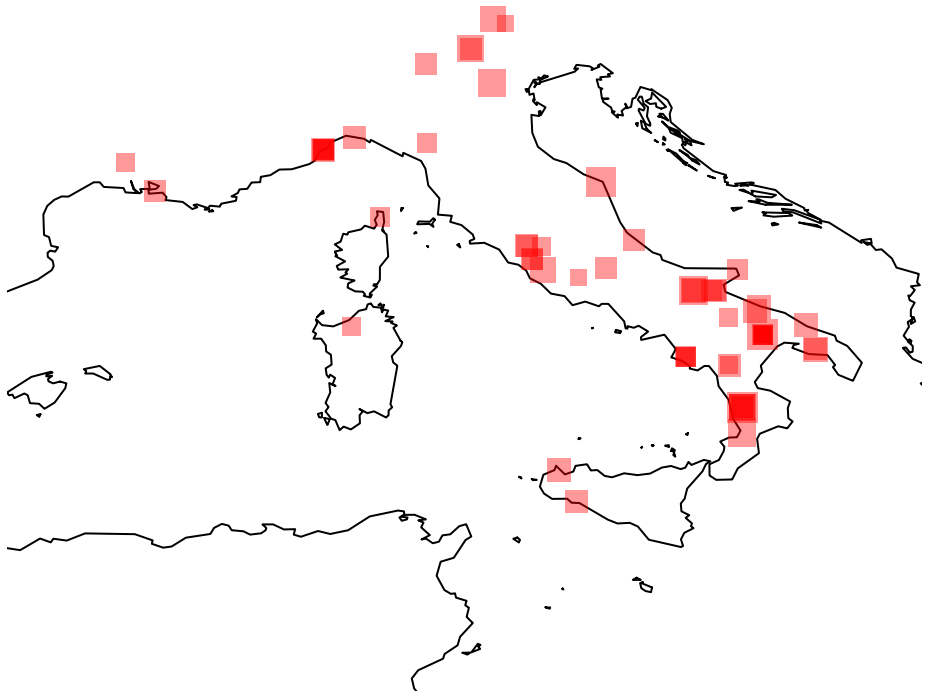

5815 cal. BC

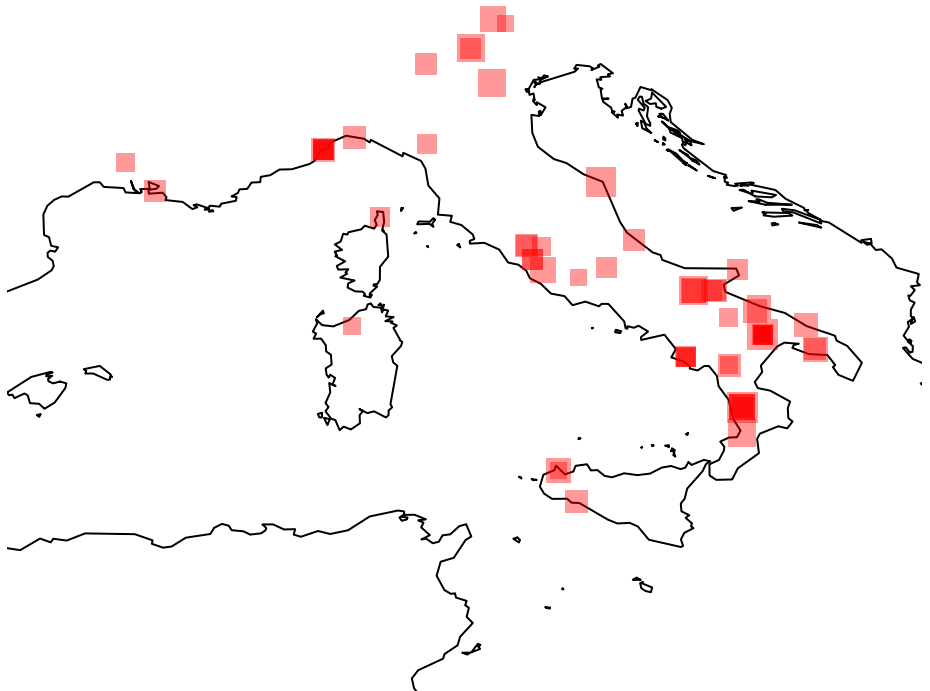





5805 cal. BC

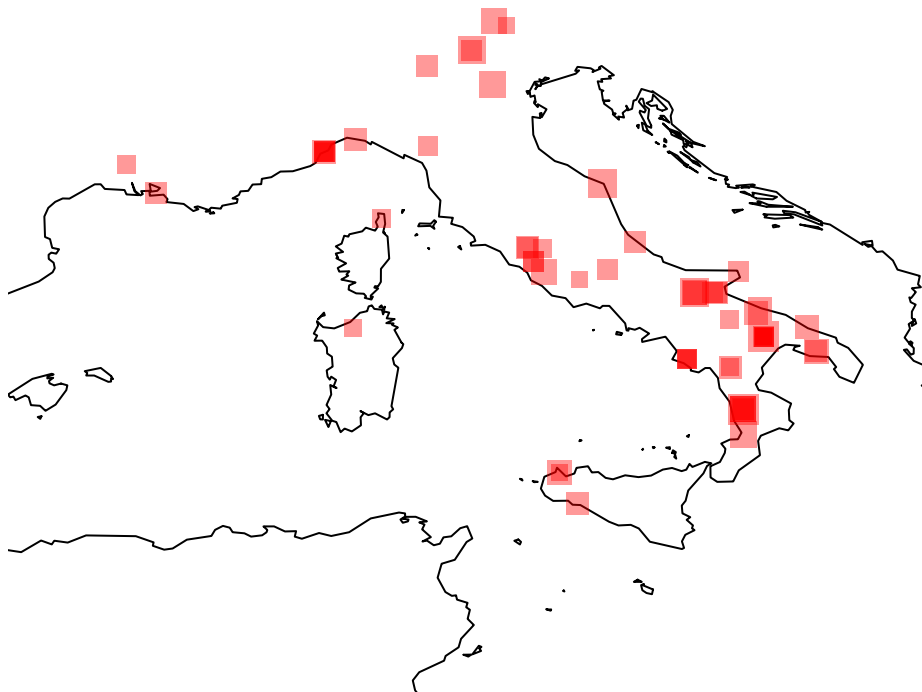



5795 cal. BC

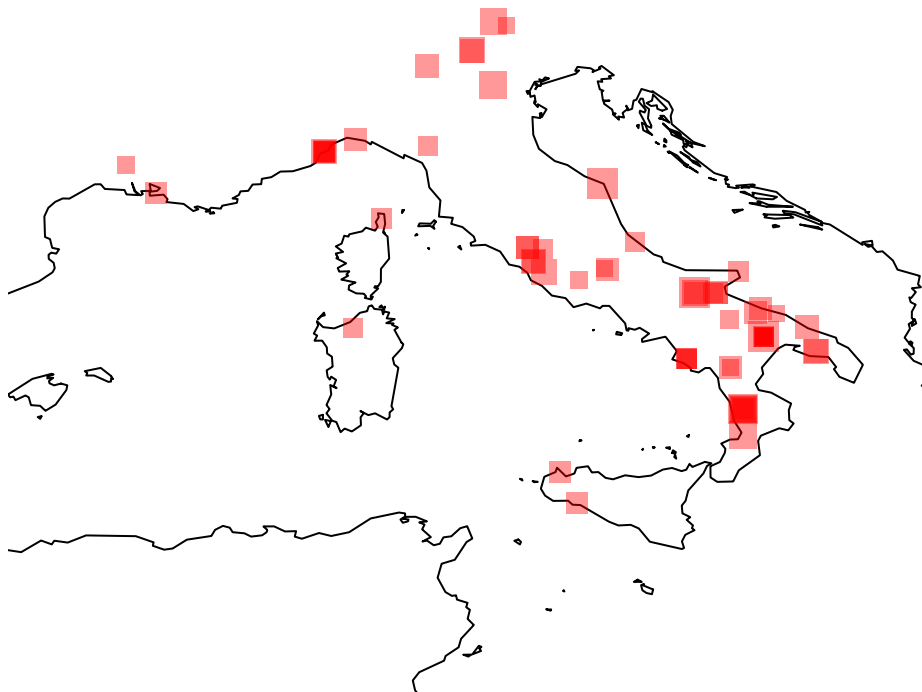

5790 cal. BC

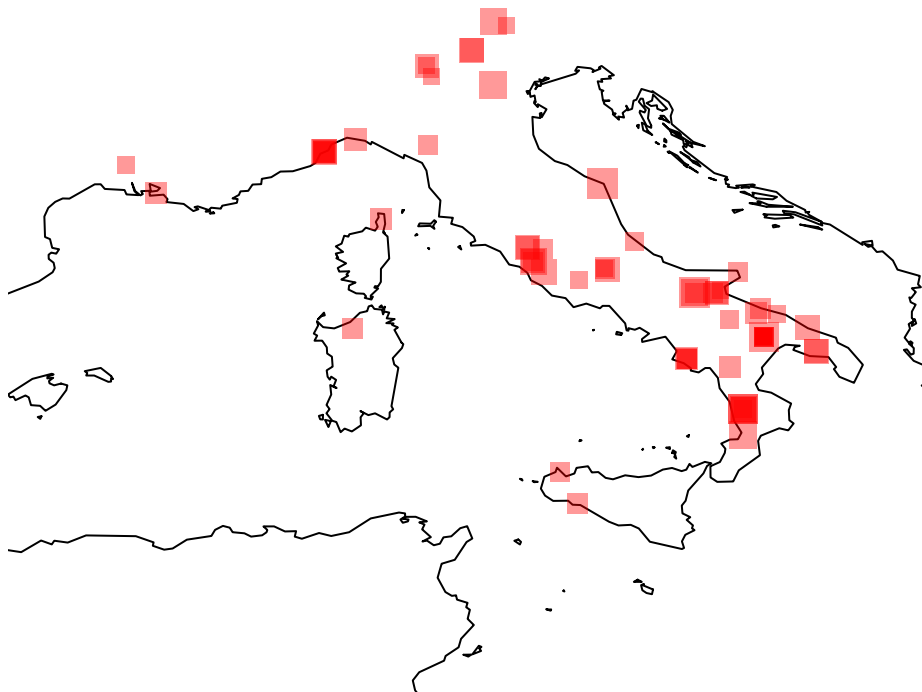

**5785 cal. BC**

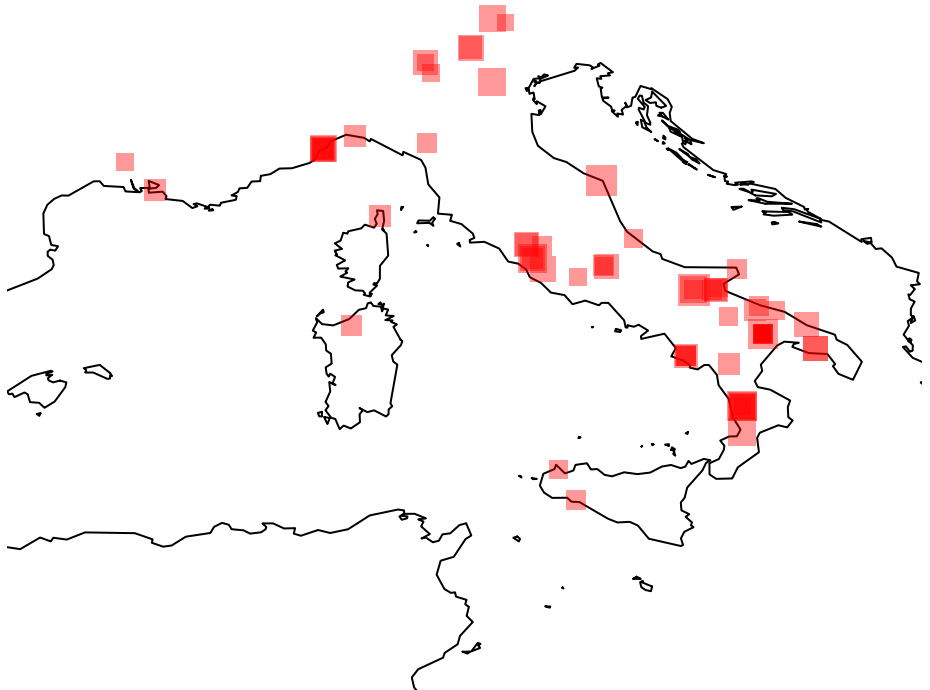

5780 cal. BC

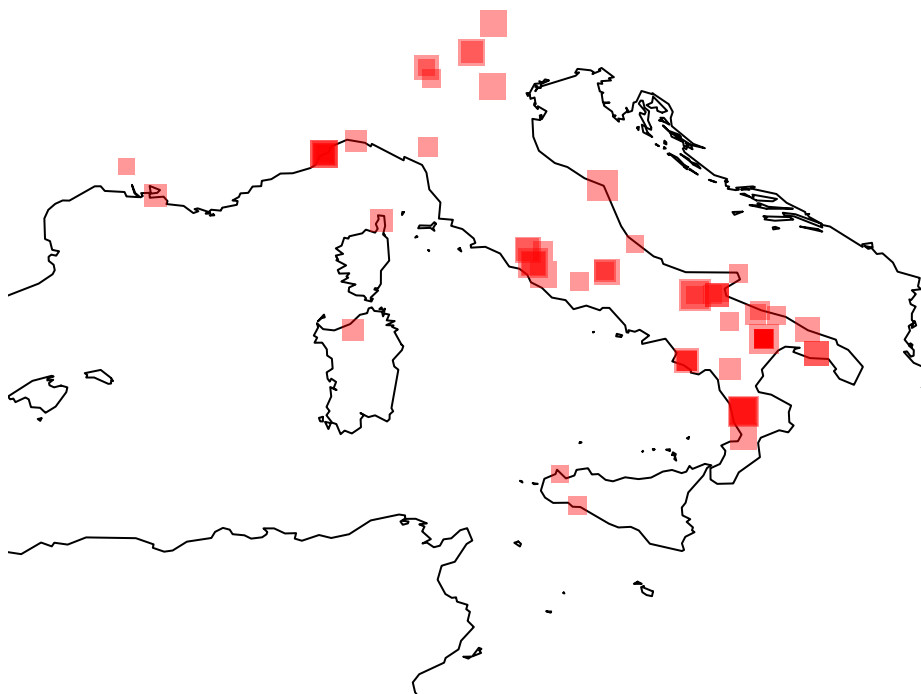



5770 cal. BC

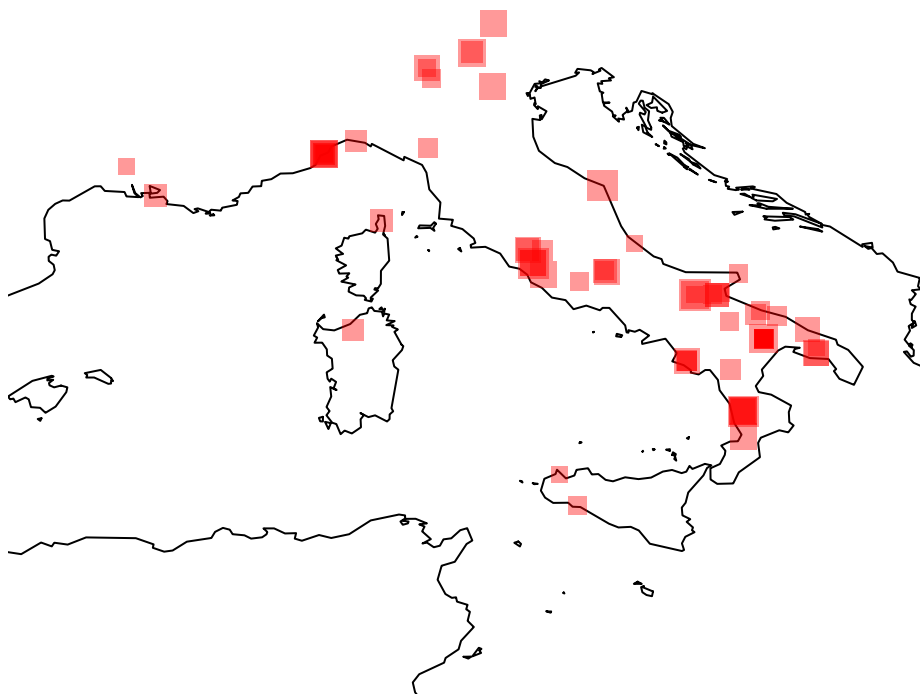



5765 cal. BC

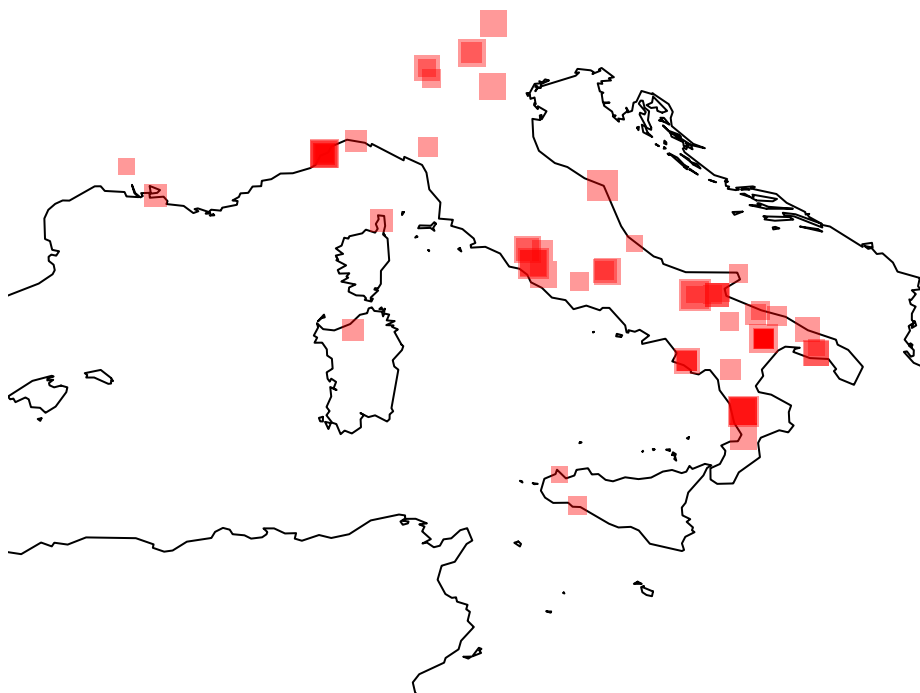



5755 cal. BC

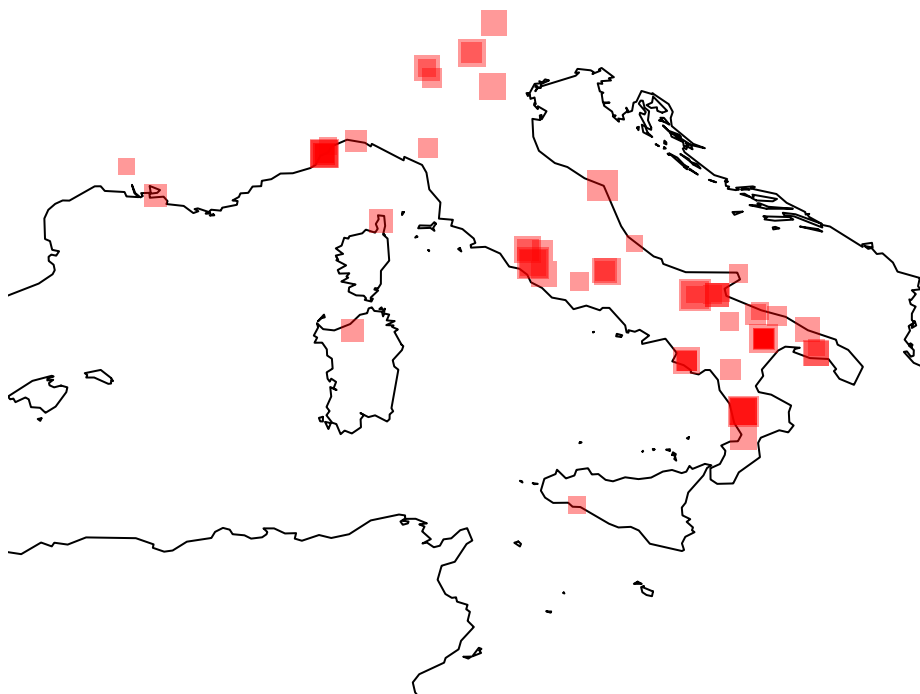

5750 cal. BC

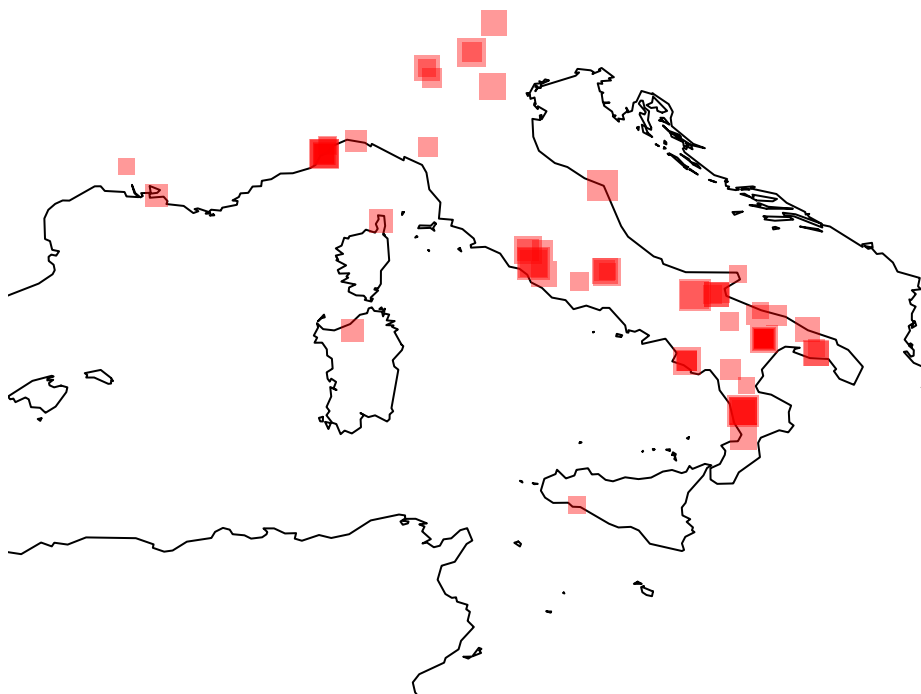

5745 cal. BC

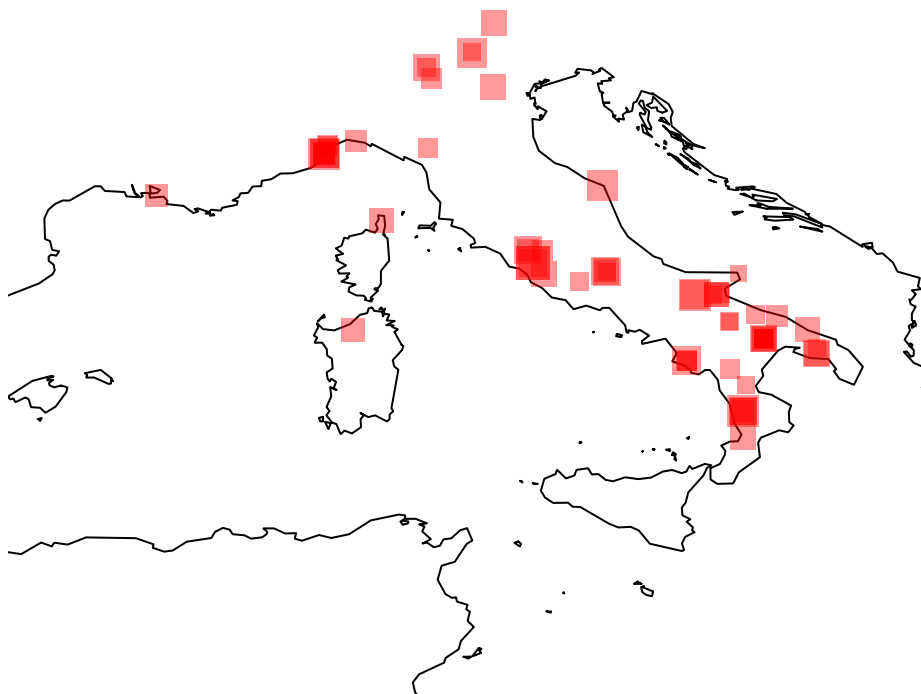

5740 cal. BC

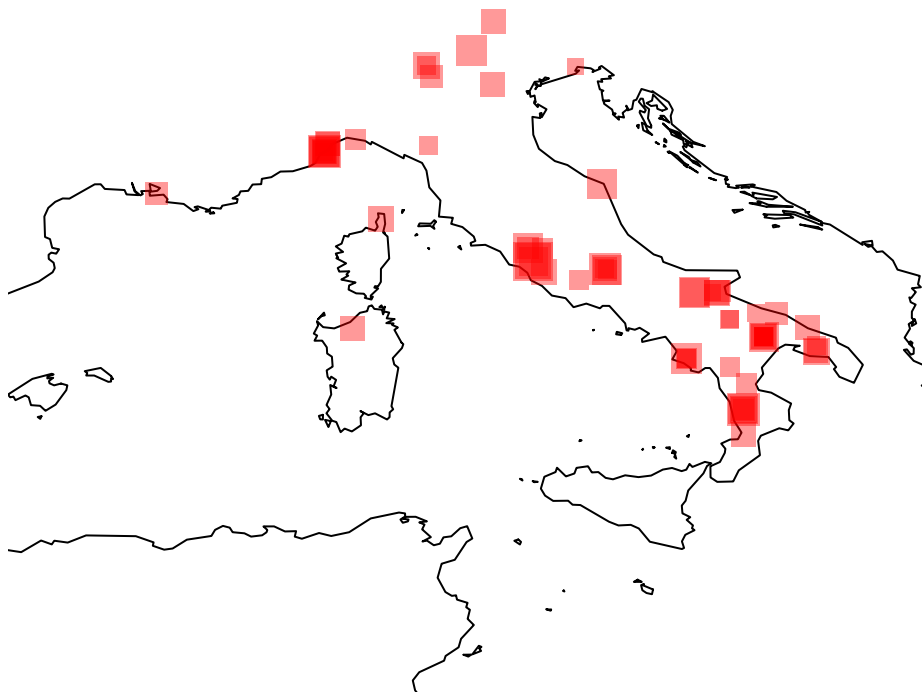

5735 cal. BC

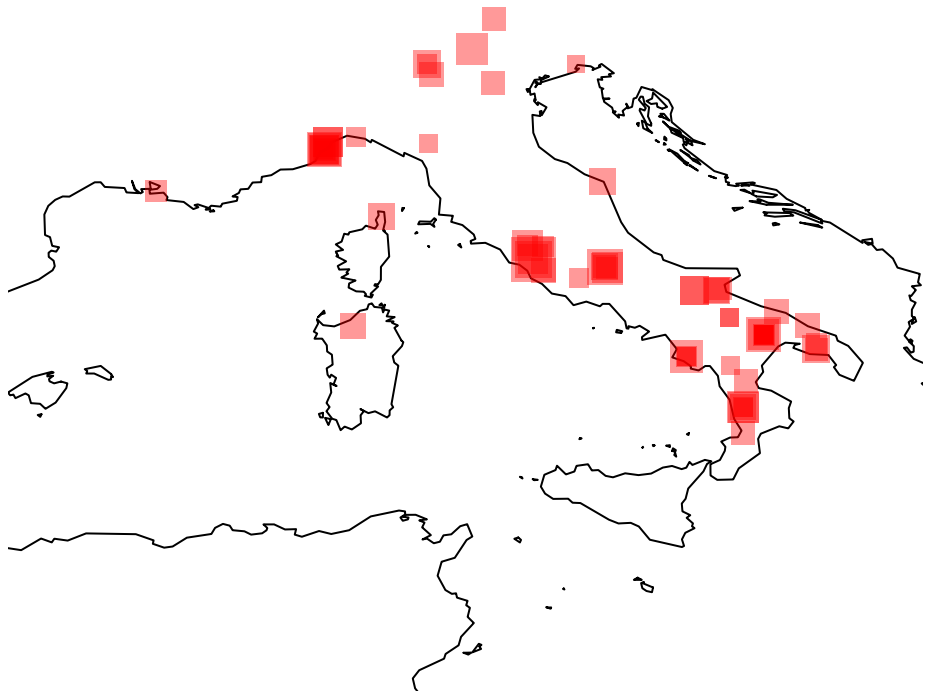

5730 cal. BC

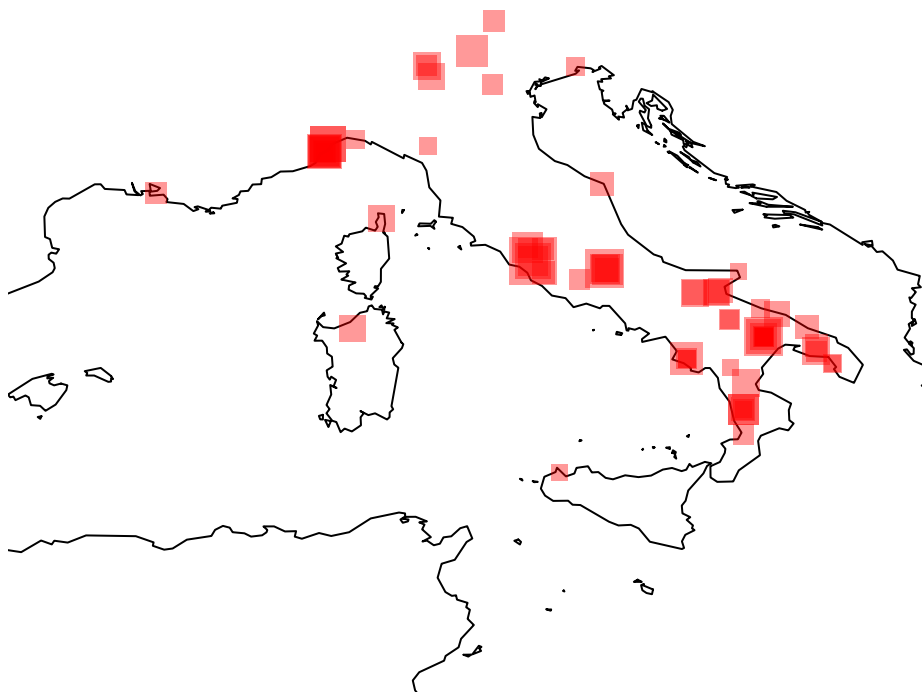



5725 cal. BC

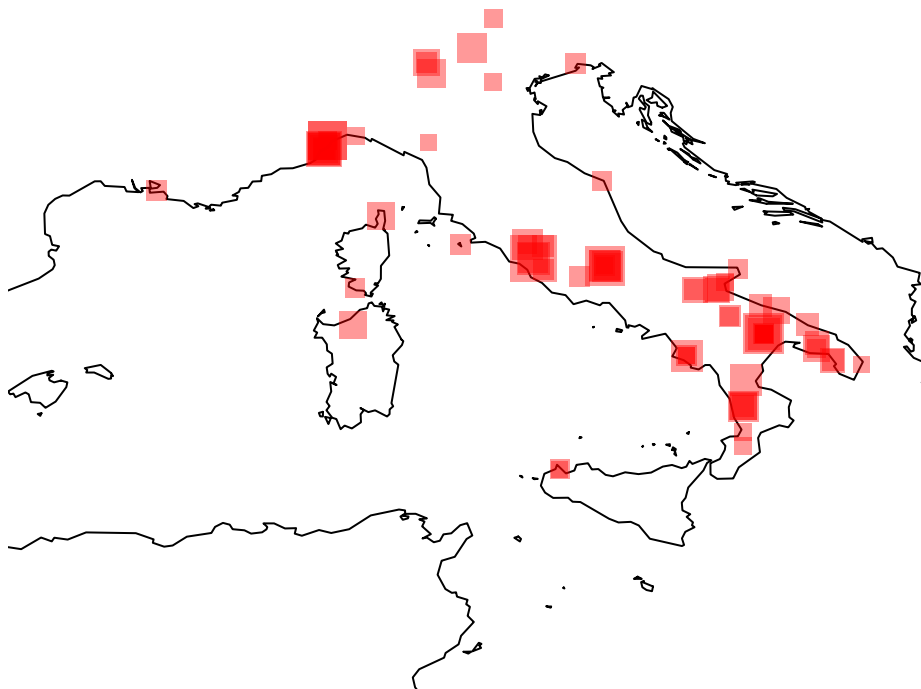

**5720 cal. BC**

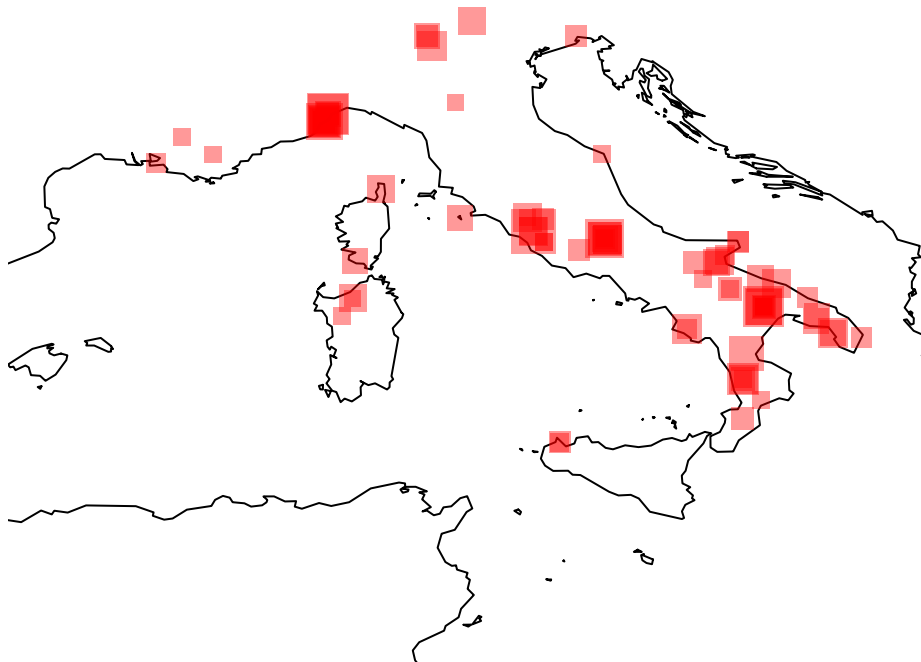

5715 cal. BC

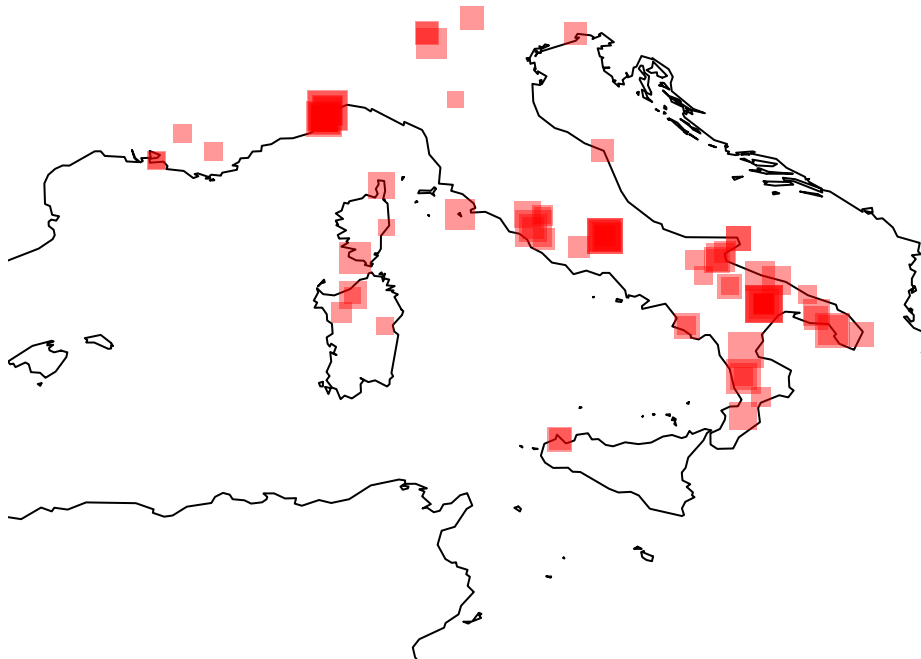

5710 cal. BC

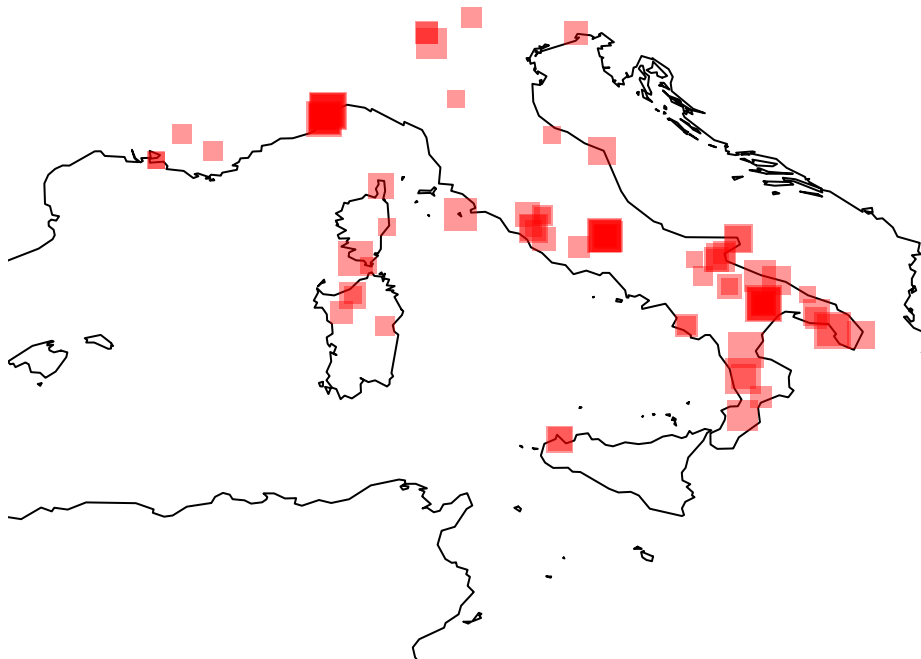

5705 cal. BC

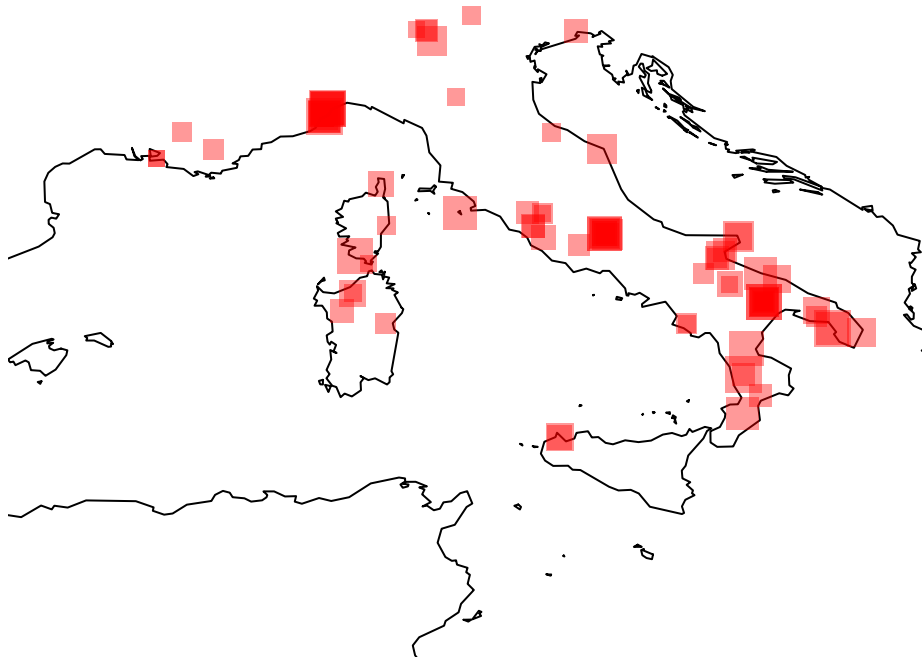

5700 cal. BC

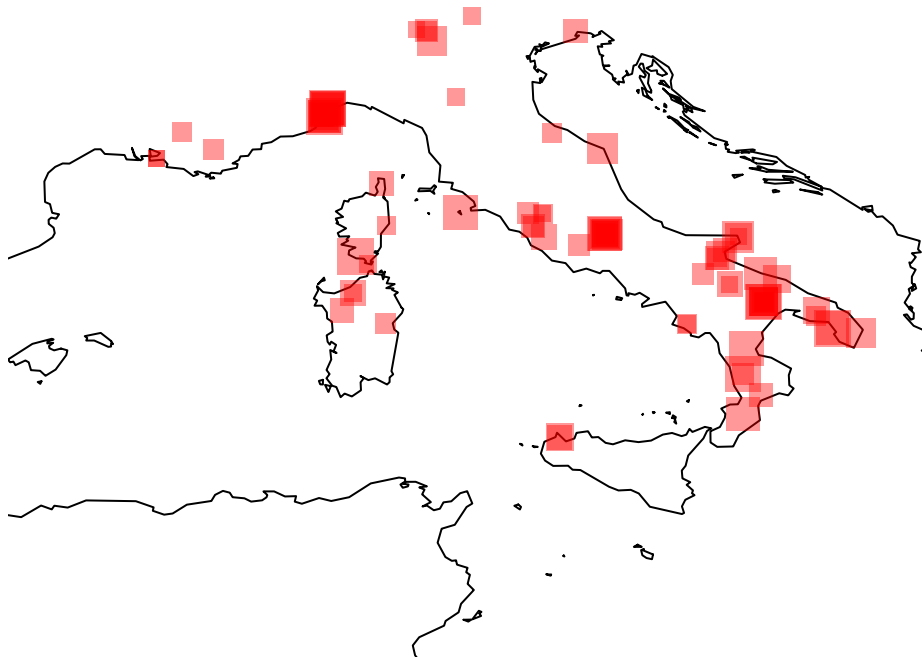

5695 cal. BC

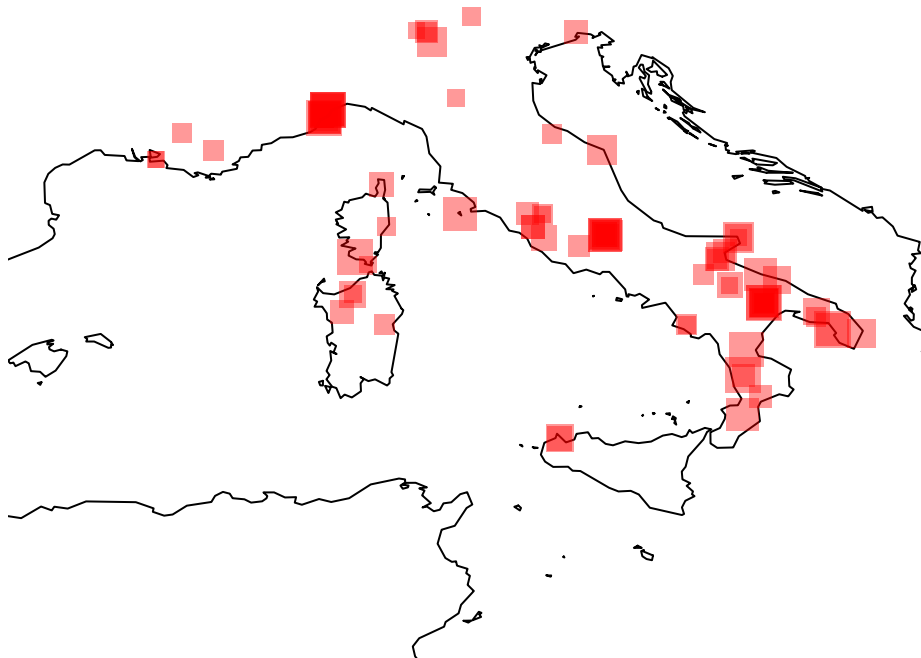

**5690 cal. BC**

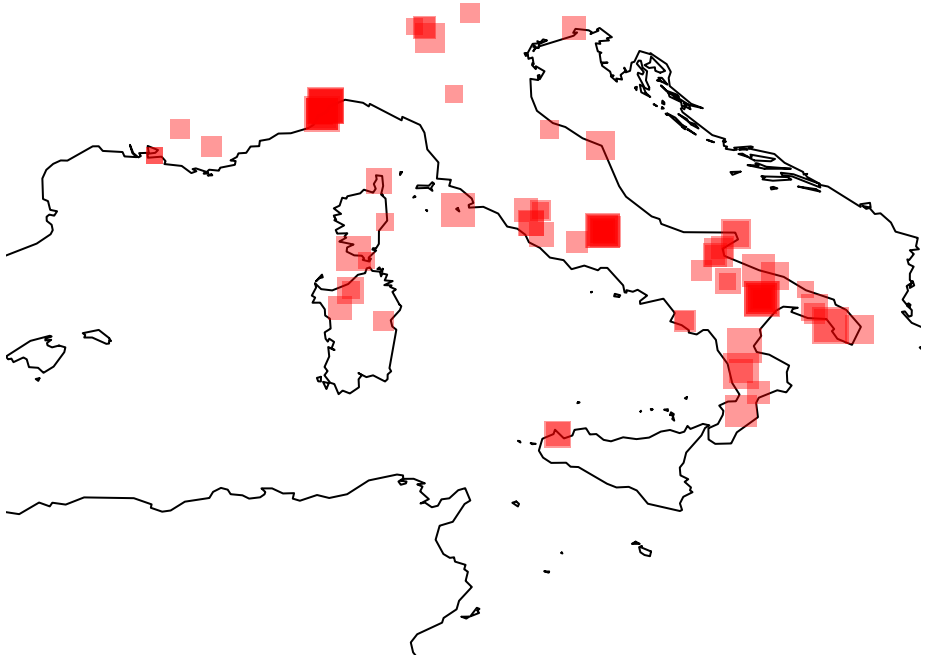



5685 cal. BC

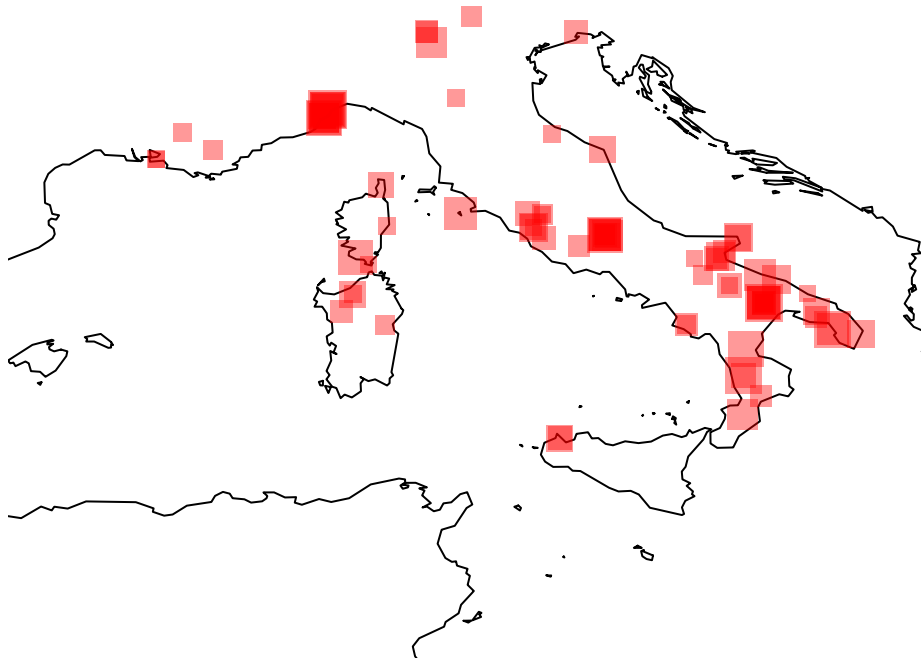

5680 cal. BC

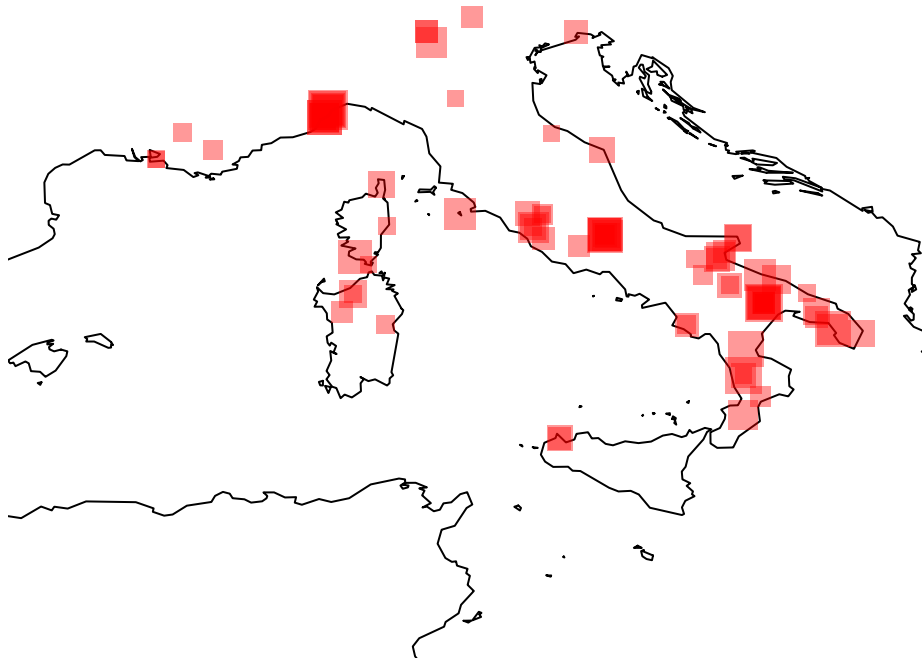

5675 cal. BC

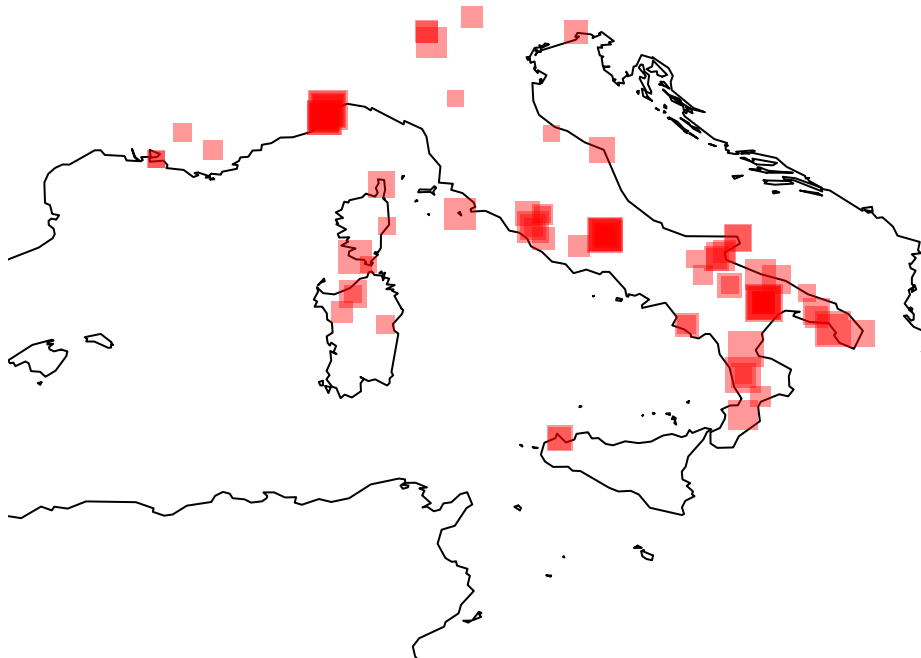

5670 cal. BC

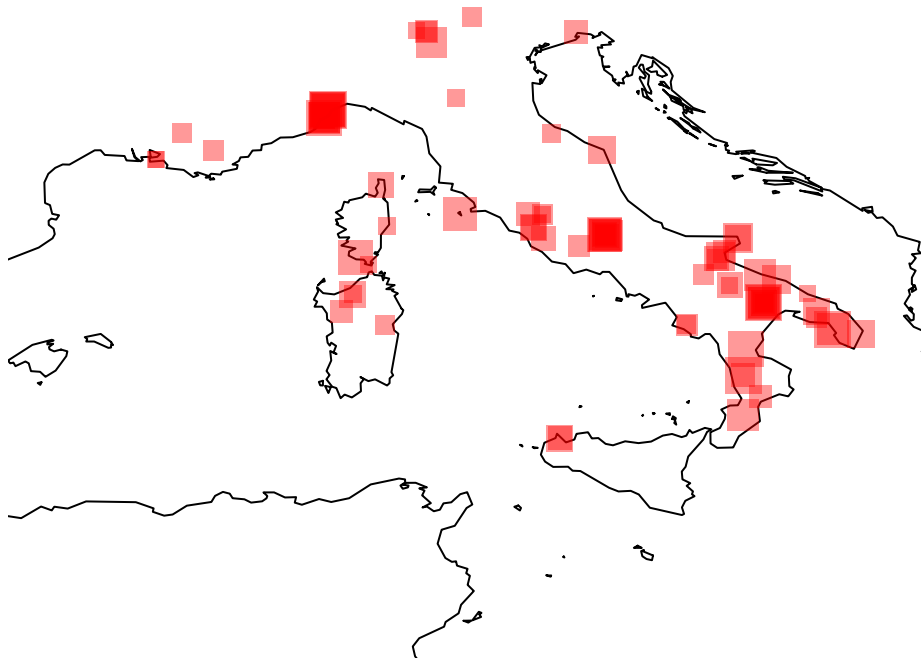

5665 cal. BC

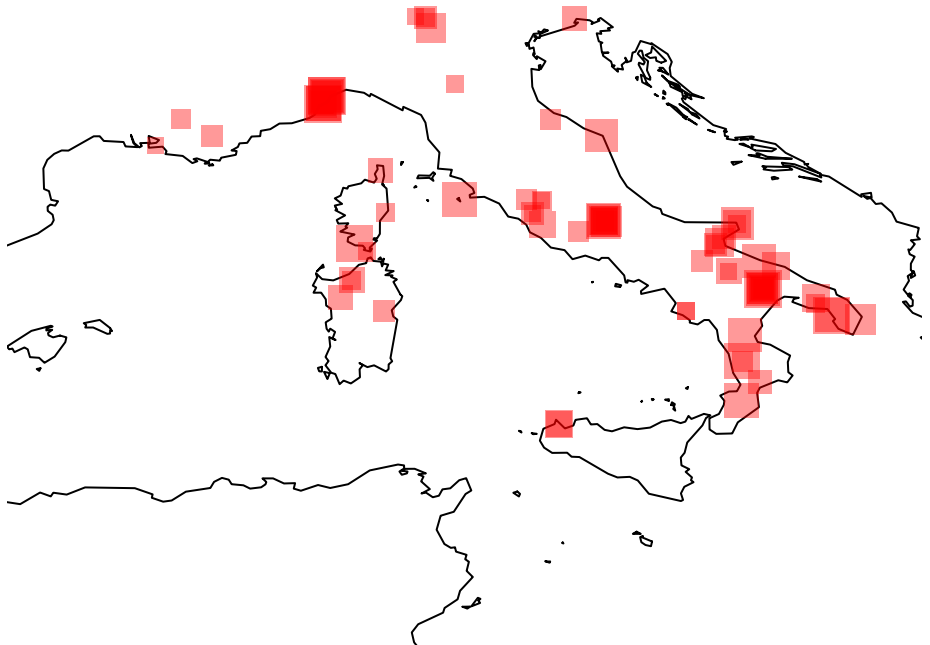

5660 cal. BC

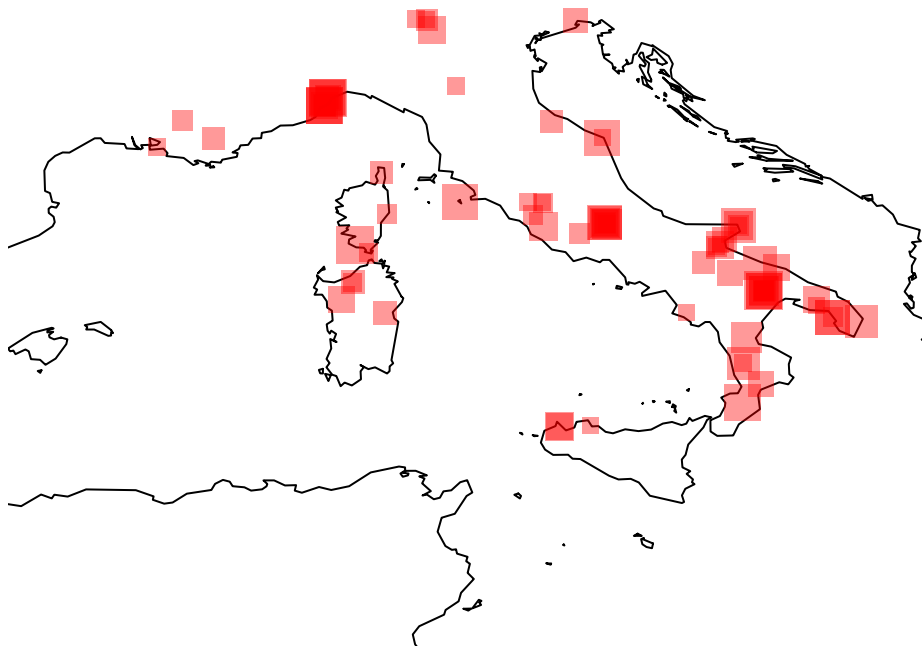

5655 cal. BC

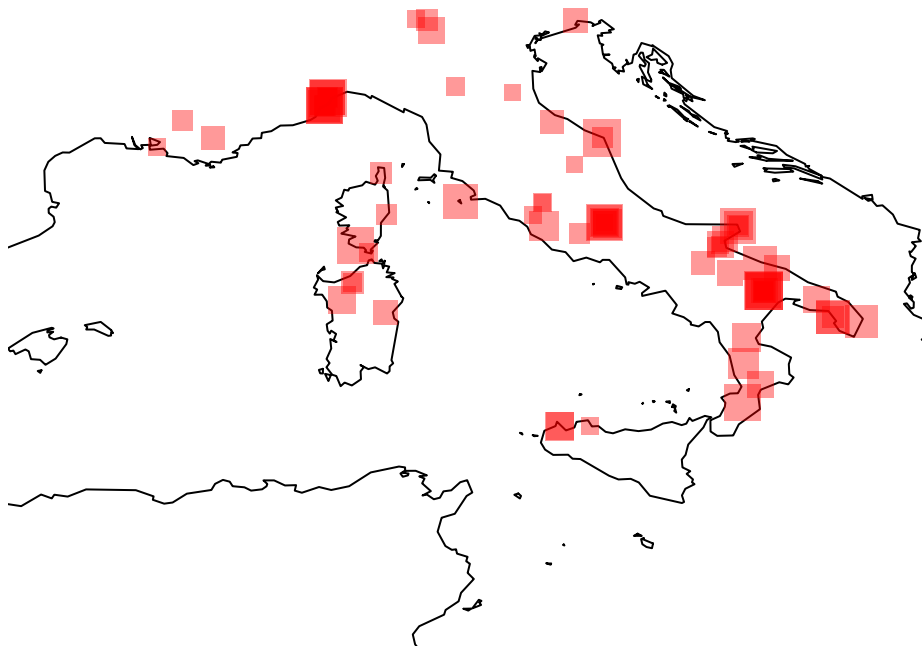

5650 cal. BC

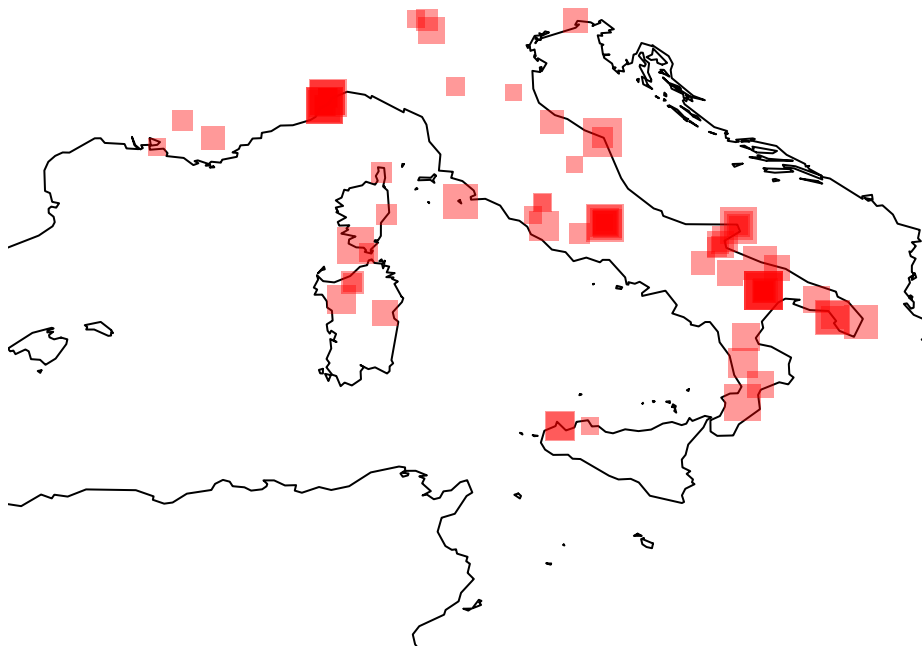



5645 cal. BC

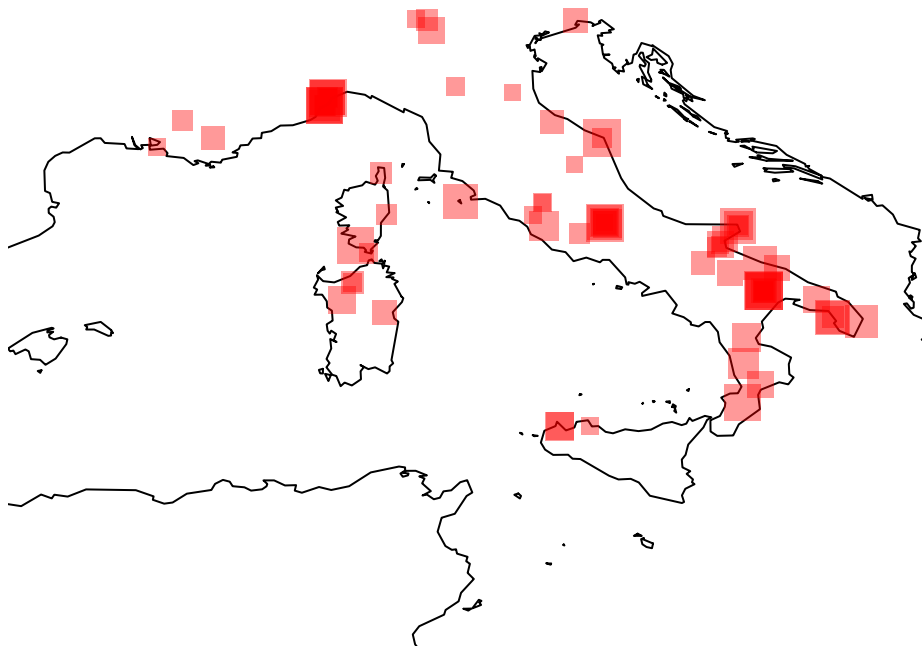

5640 cal. BC

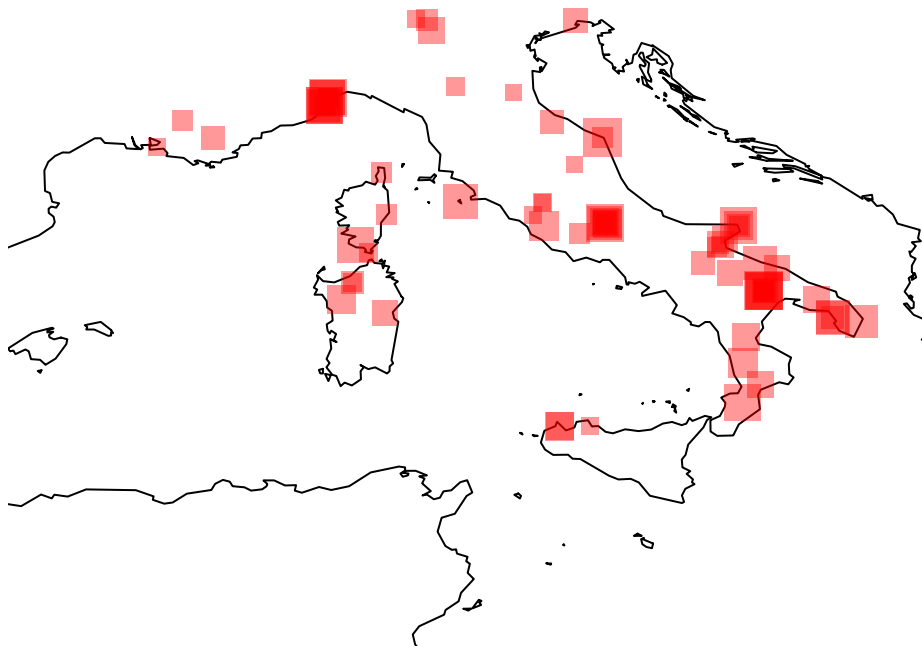

5635 cal. BC

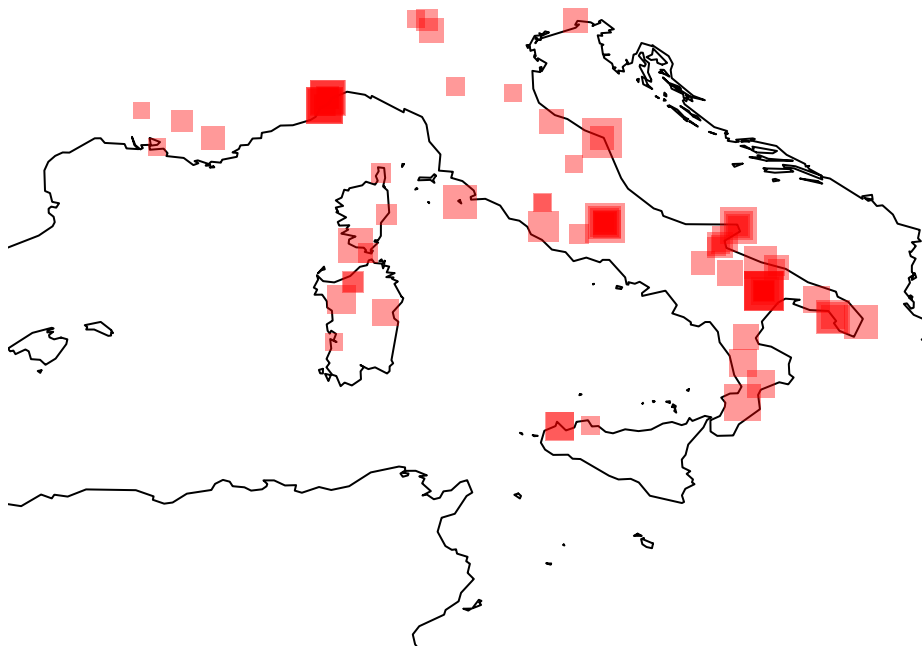

5630 cal. BC

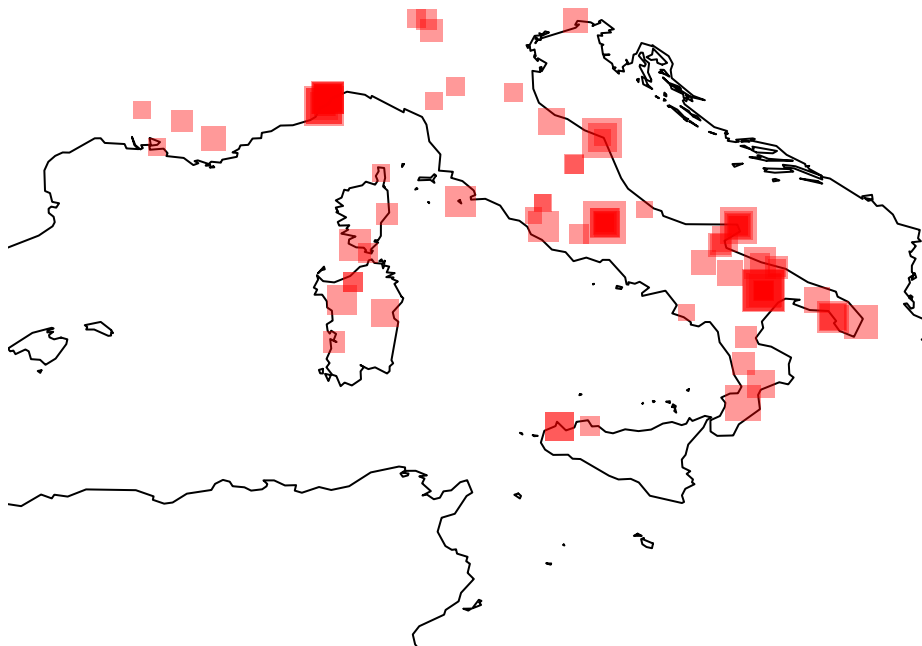

5625 cal. BC

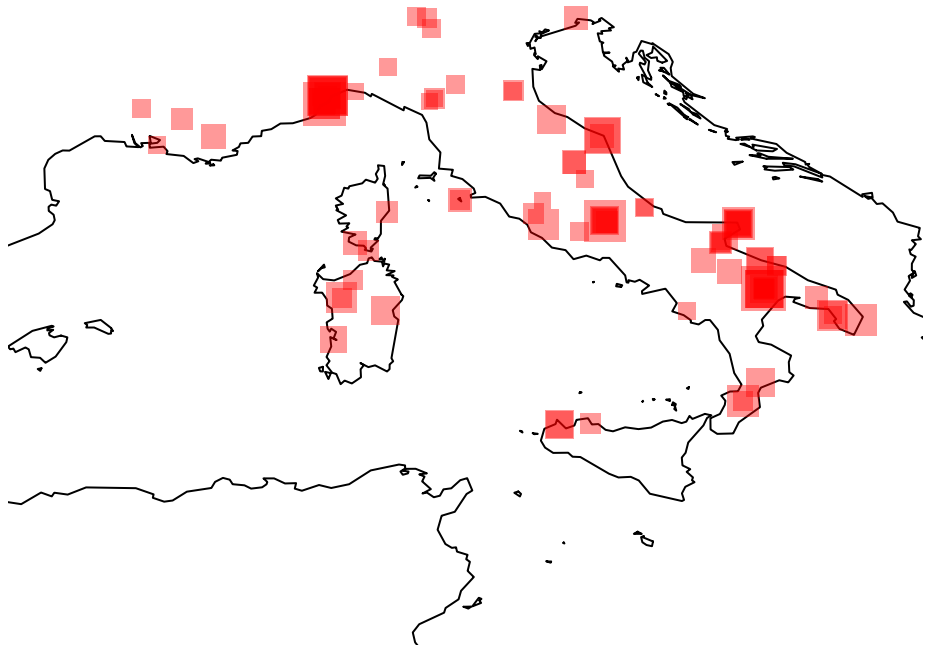

5620 cal. BC

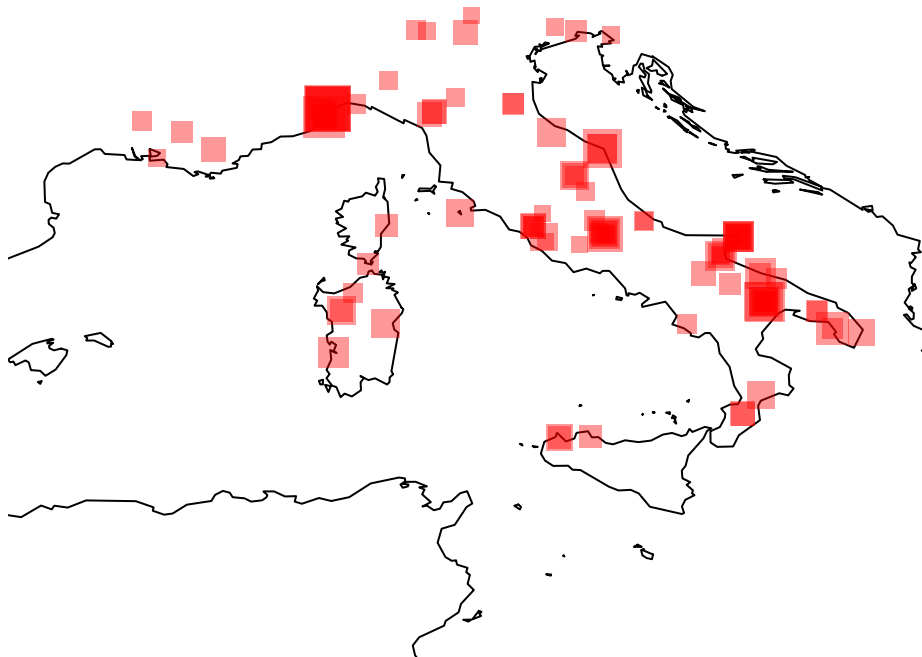

5615 cal. BC

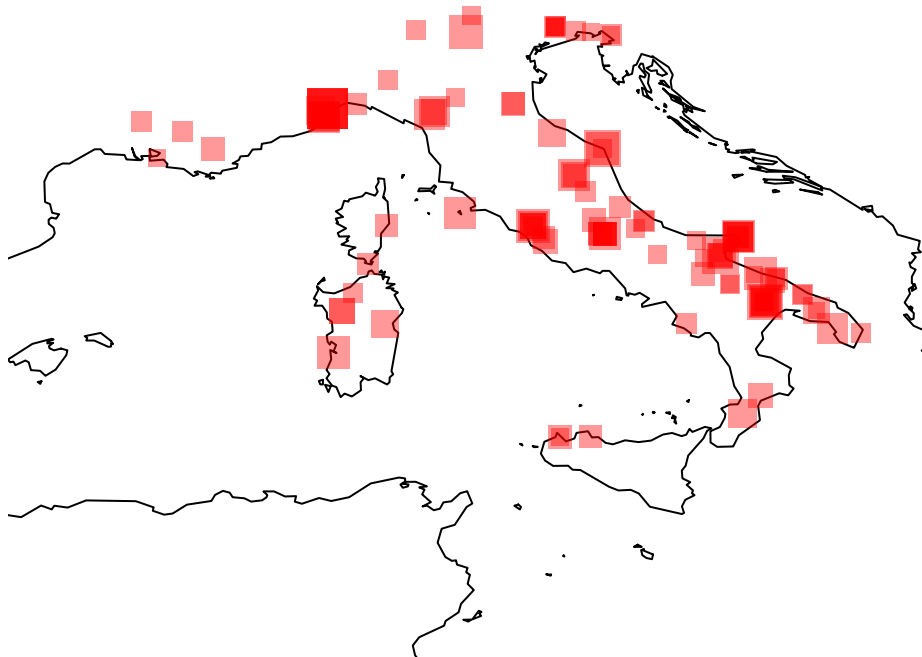

5610 cal. BC

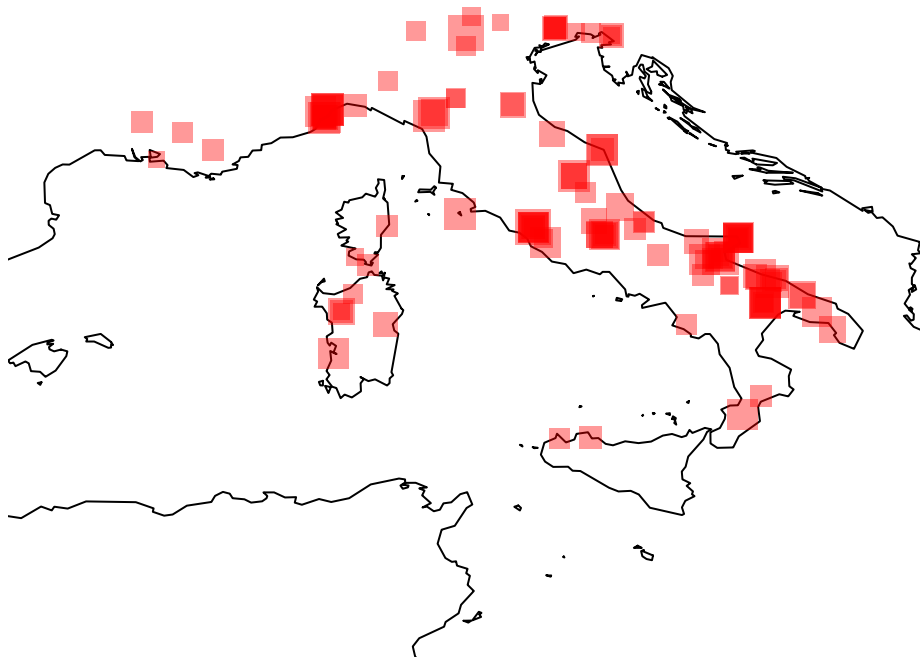



5605 cal. BC

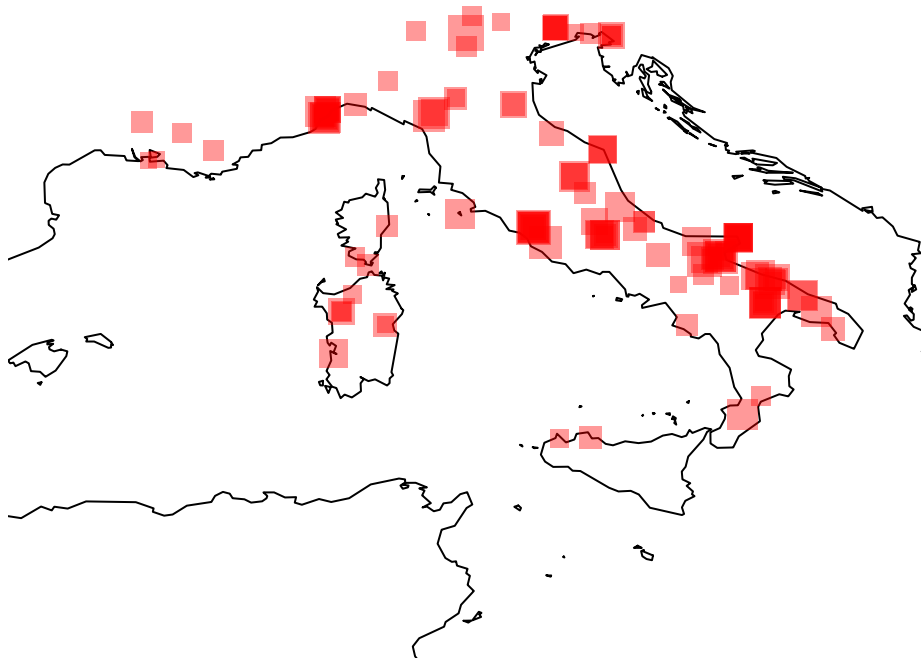

5600 cal. BC

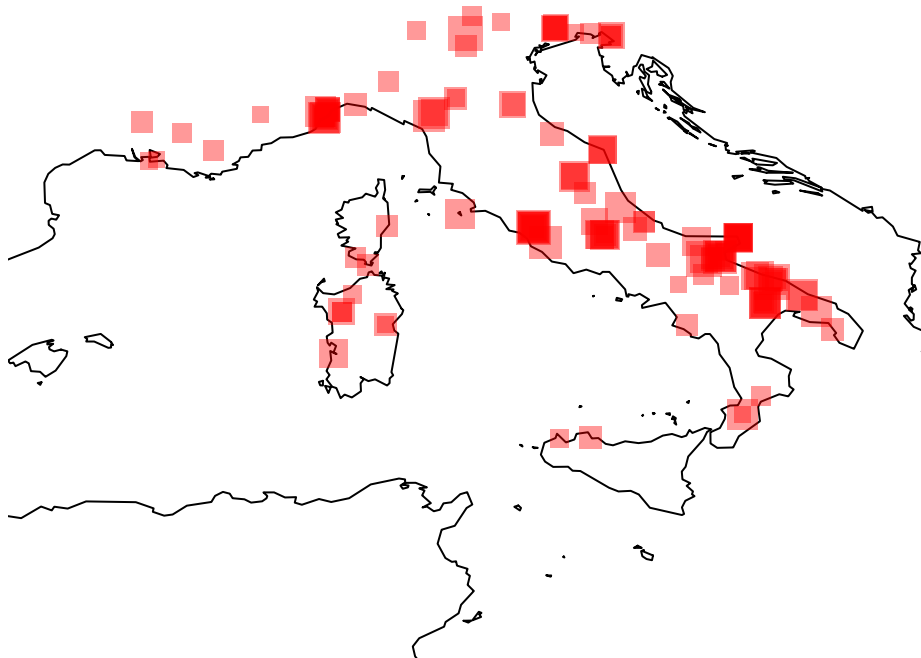

5595 cal. BC

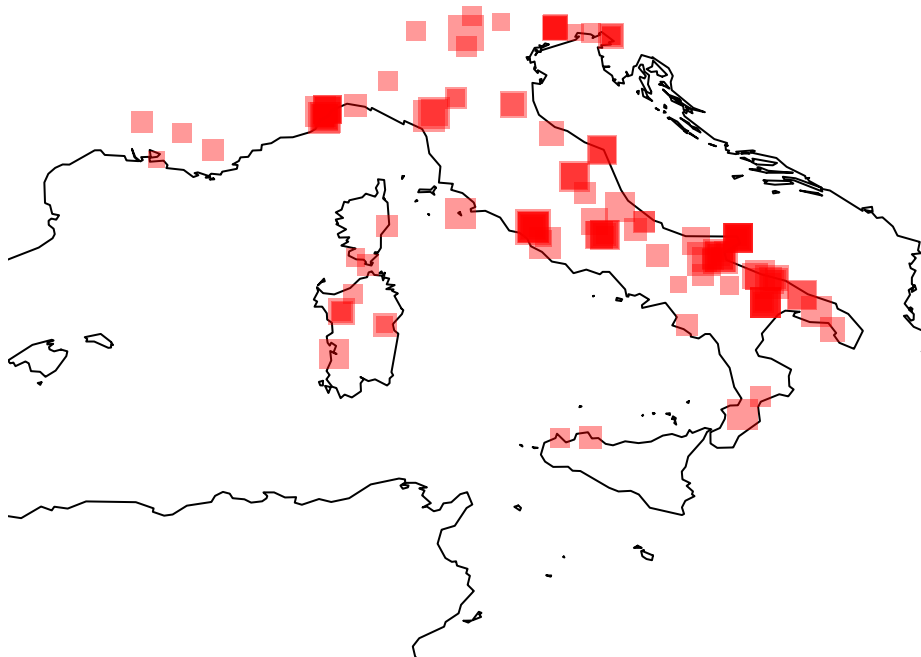

5590 cal. BC

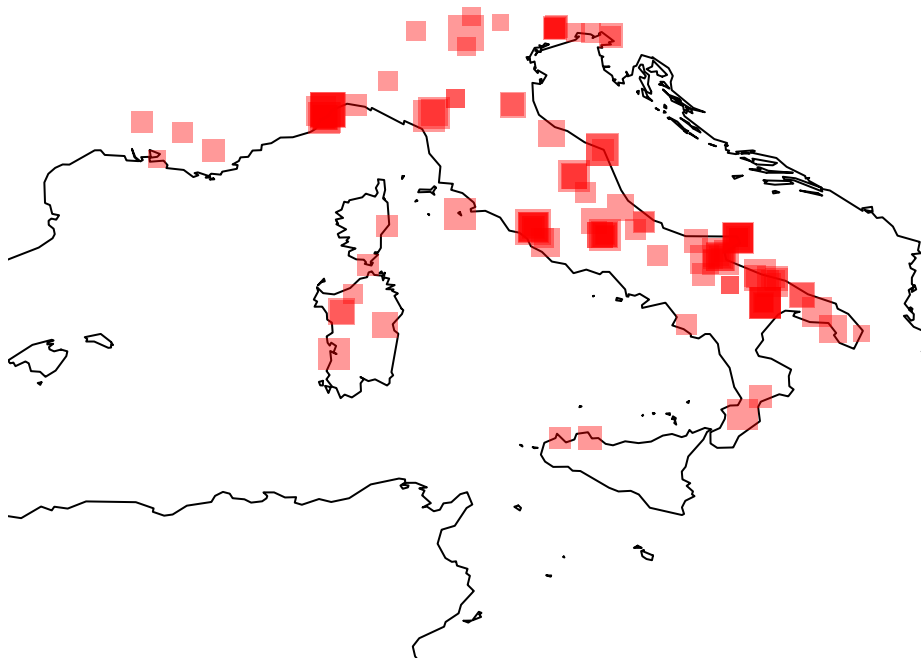

5585 cal. BC

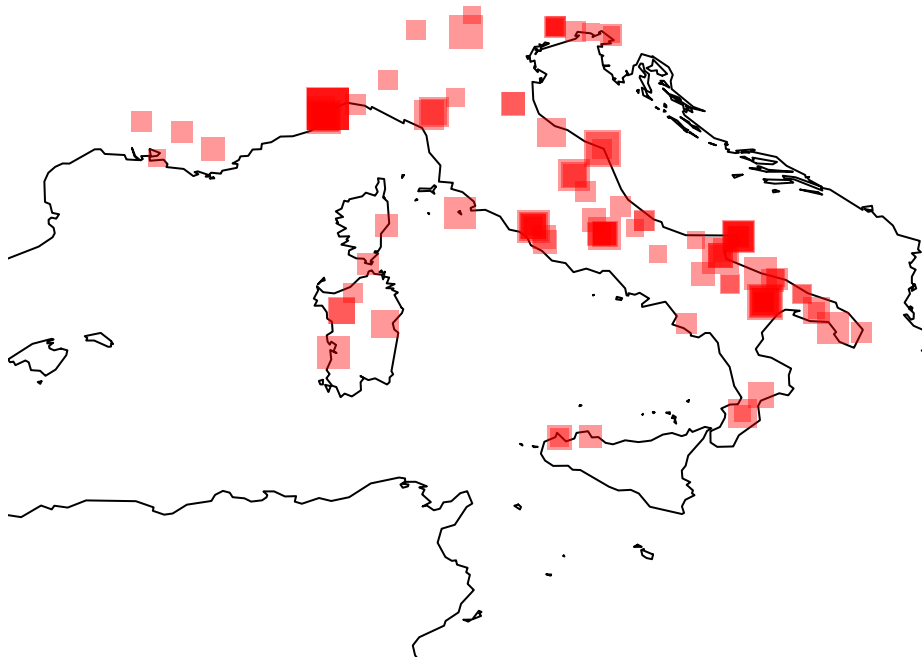

5580 cal. BC

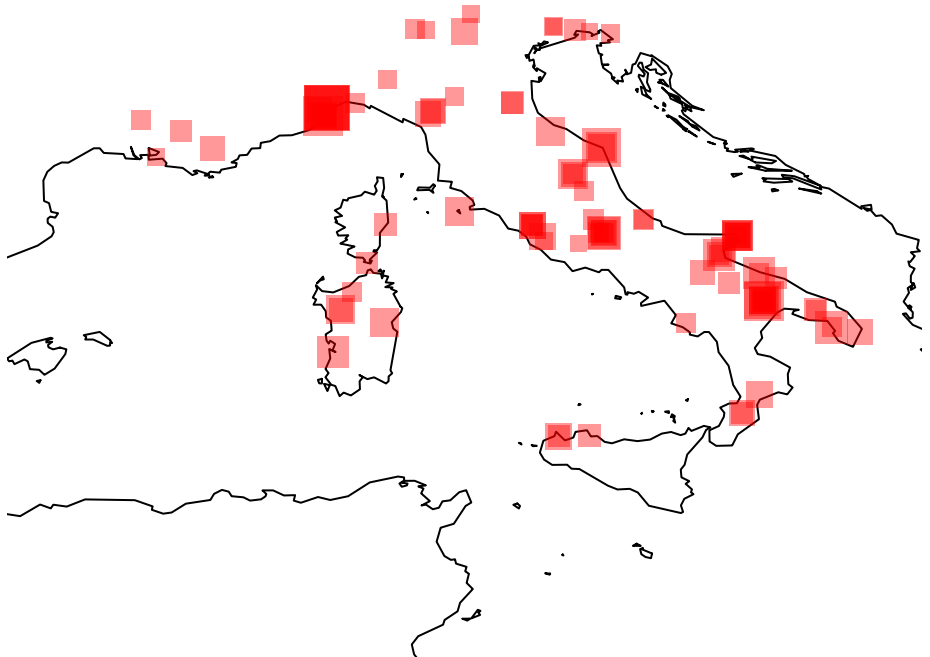

5575 cal. BC

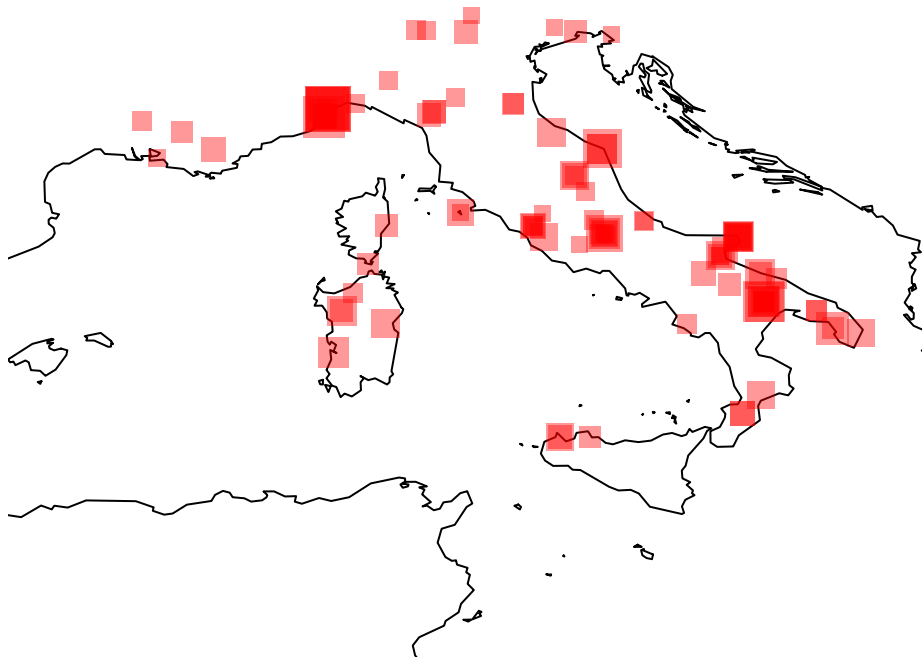

5570 cal. BC

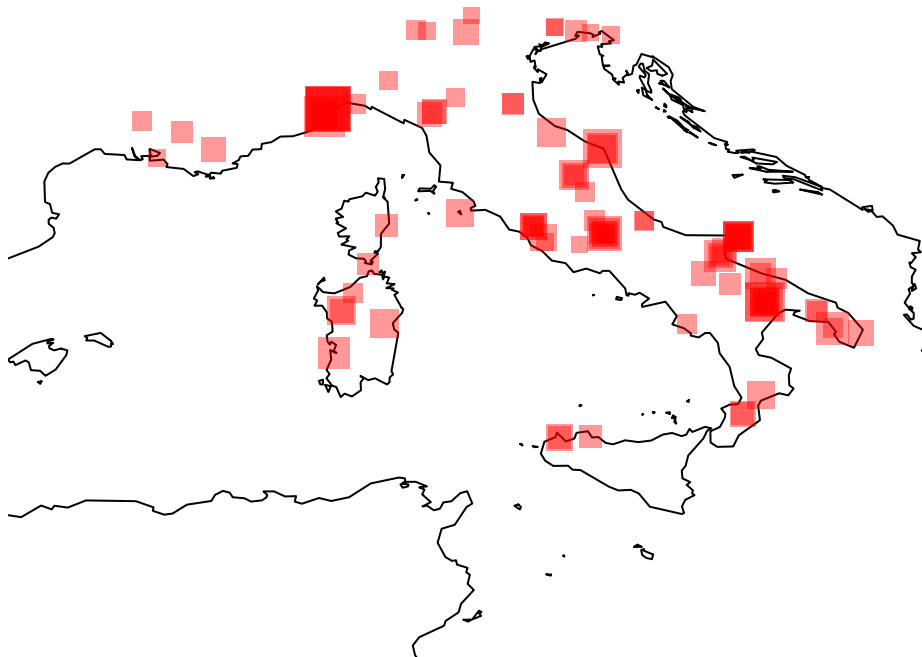



5565 cal. BC

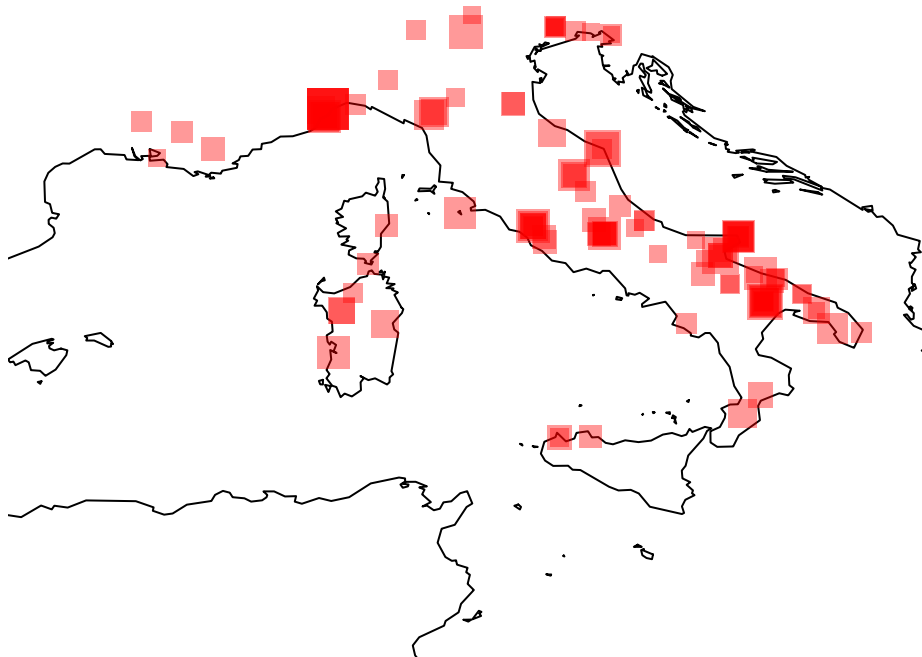

5560 cal. BC

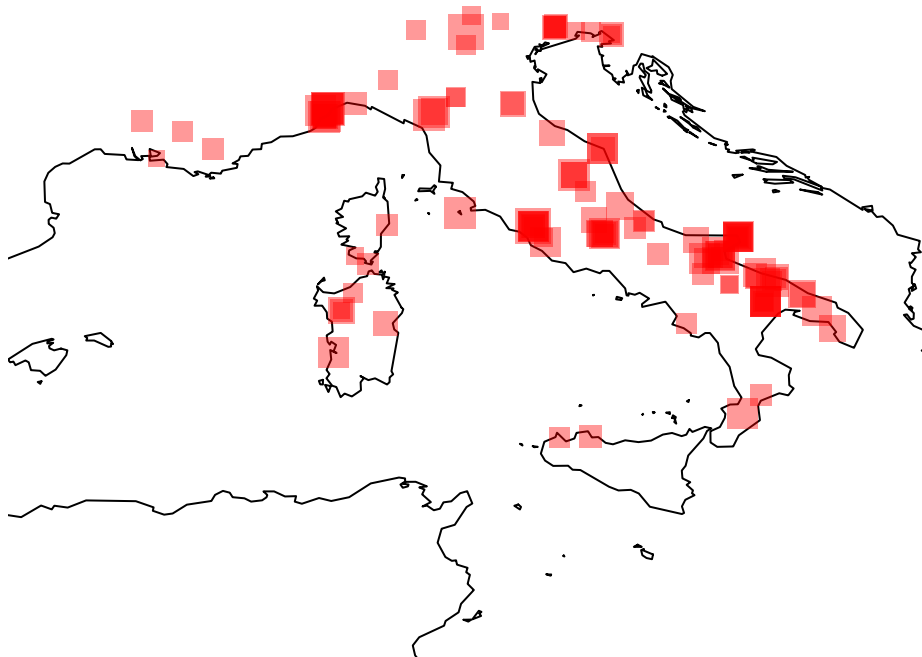

5555 cal. BC

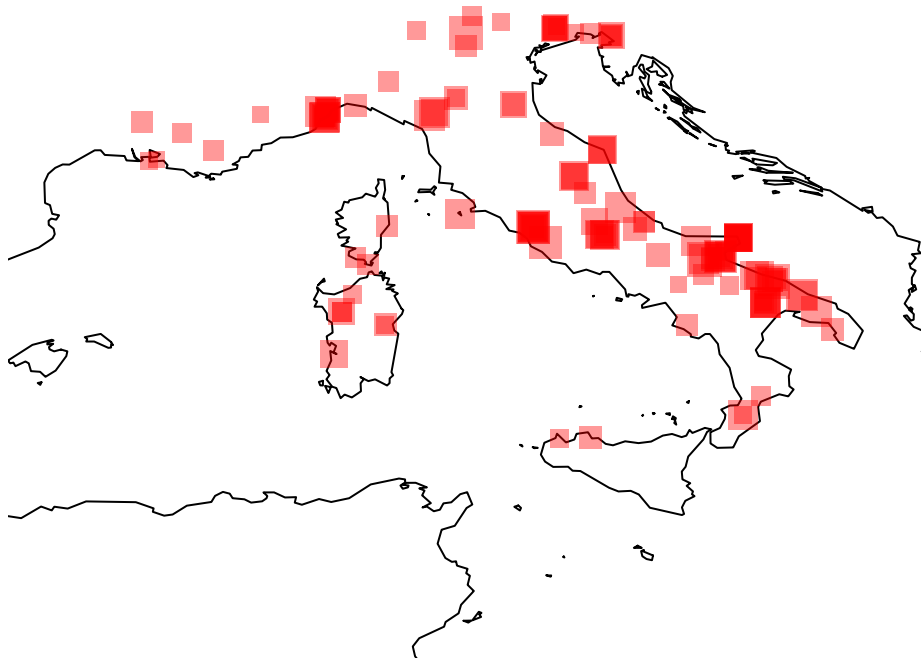

5550 cal. BC

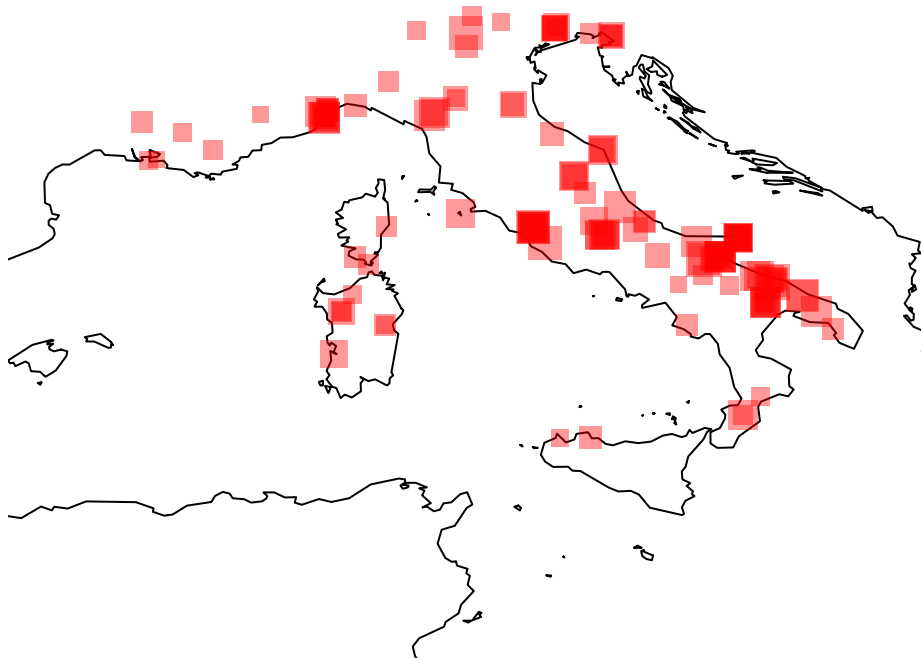

5545 cal. BC

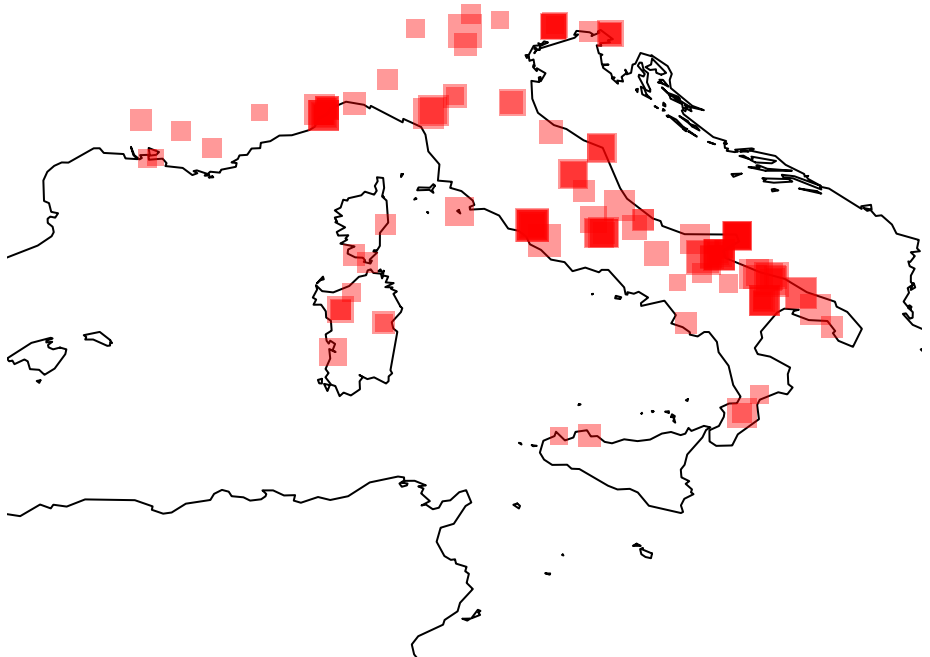

5540 cal. BC

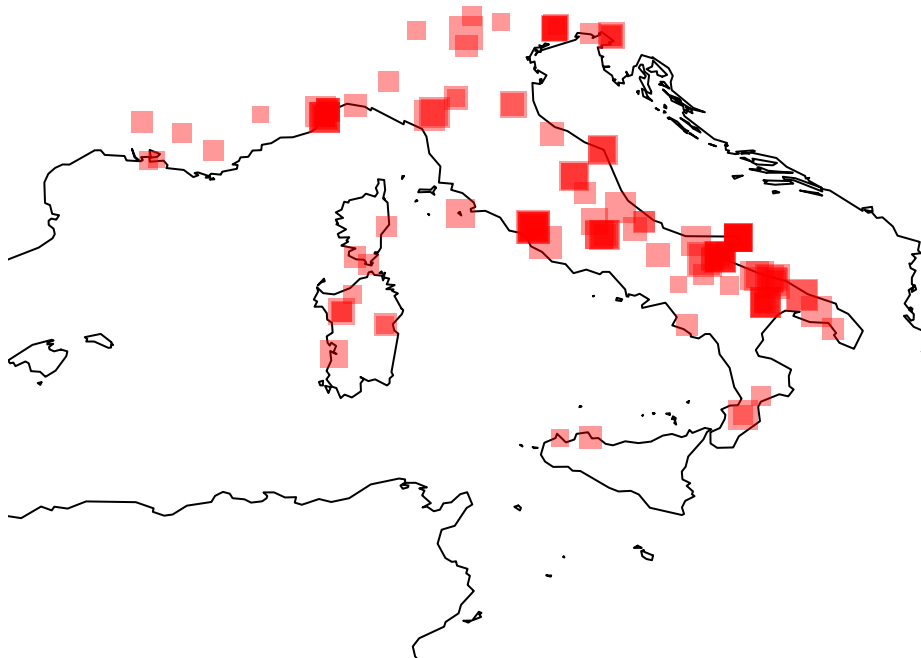

5535 cal. BC

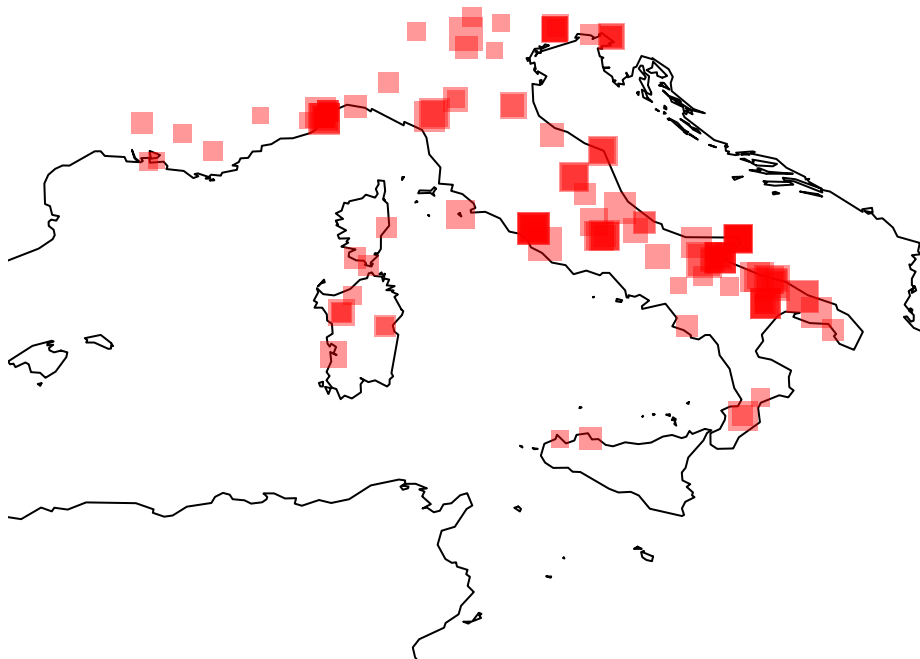

5530 cal. BC

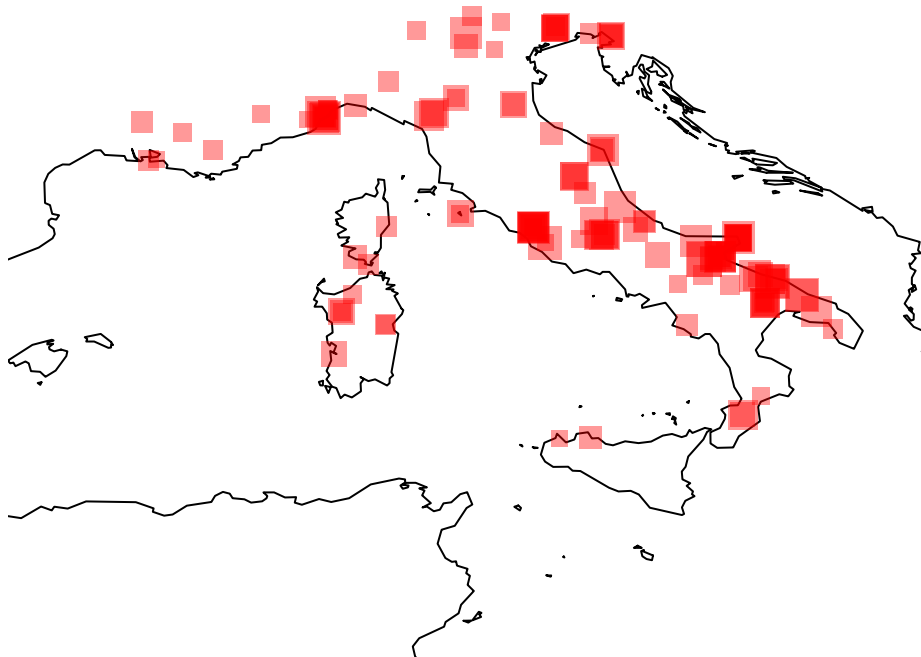



5525 cal. BC

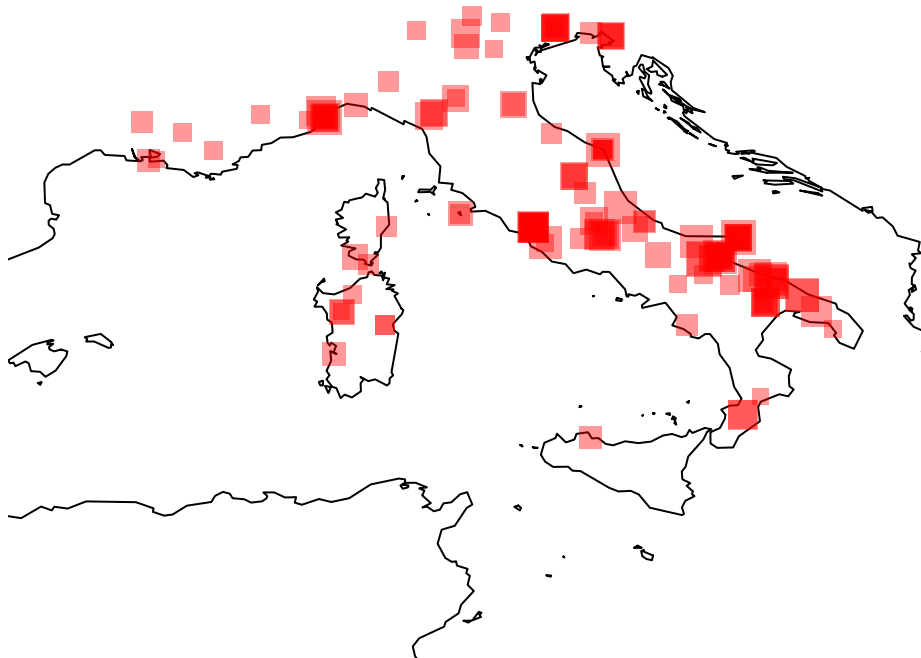

5520 cal. BC

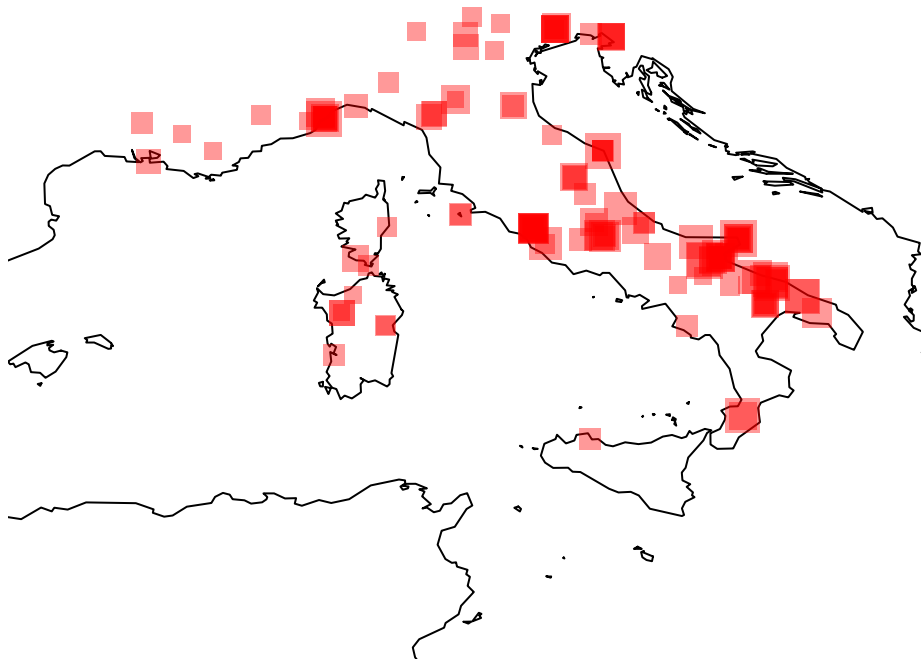

5515 cal. BC

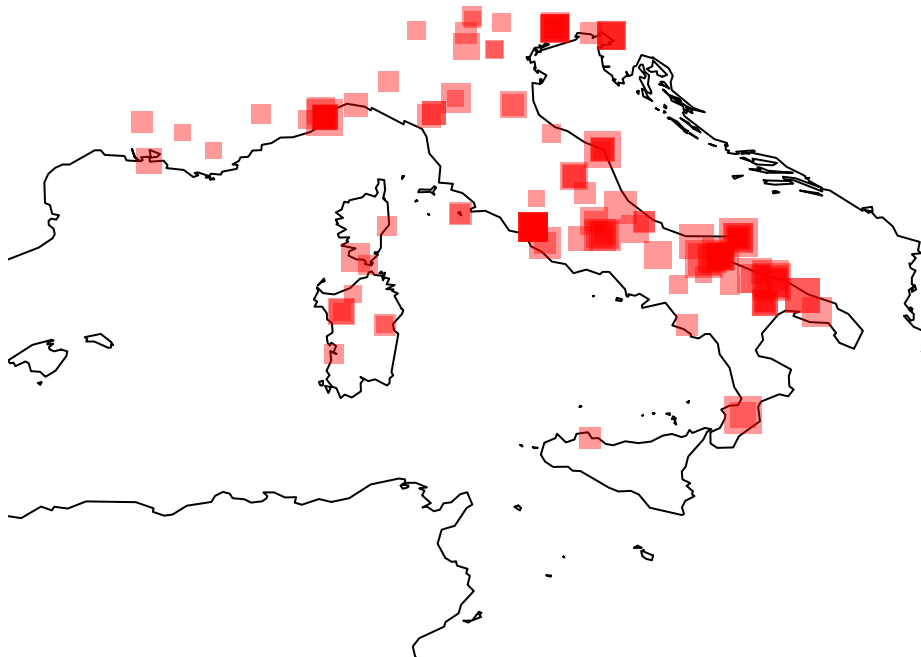

5510 cal. BC

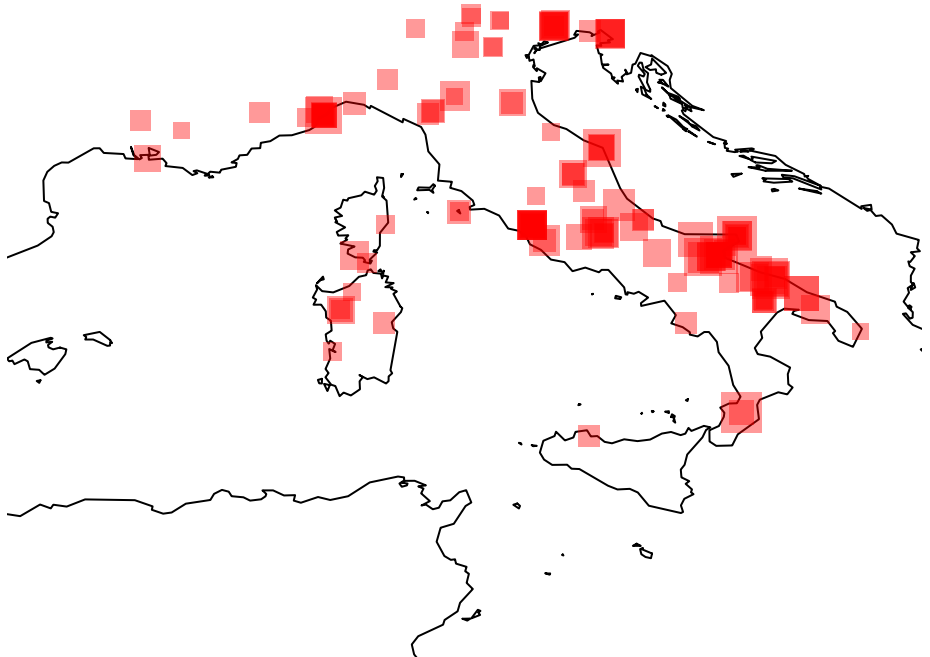

5505 cal. BC

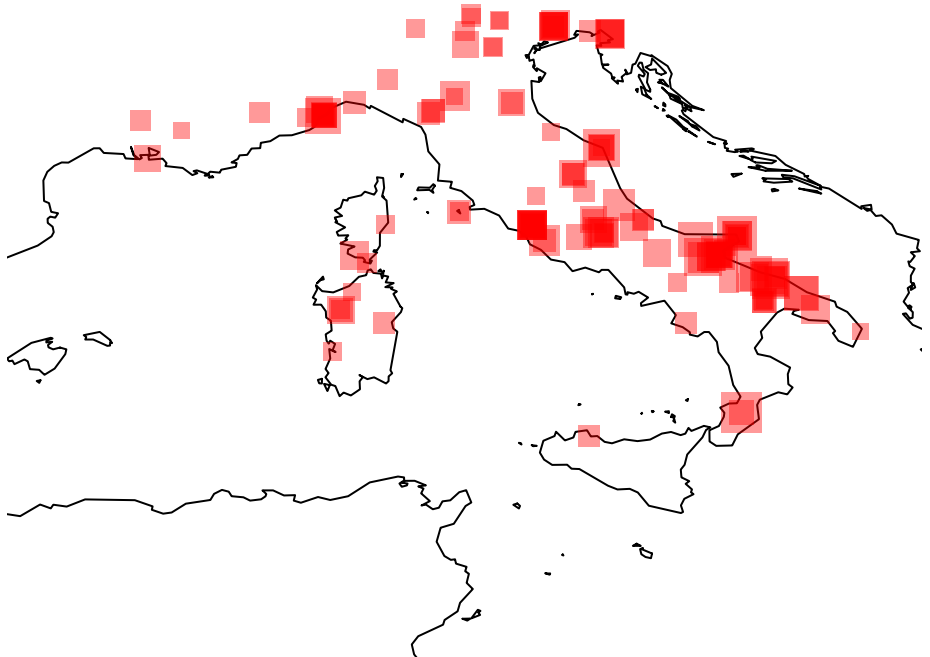

5500 cal. BC

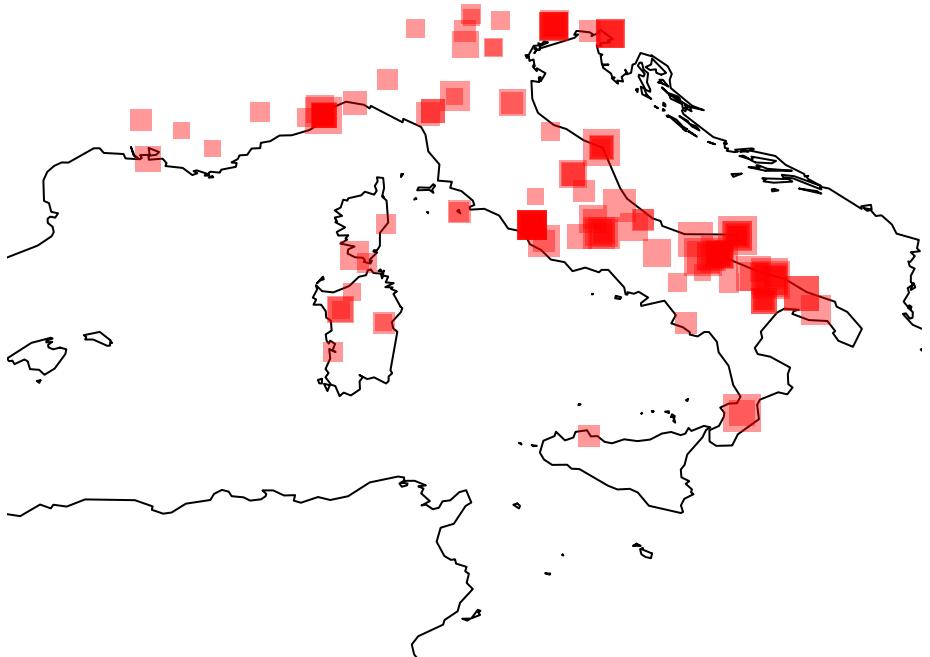

5495 cal. BC

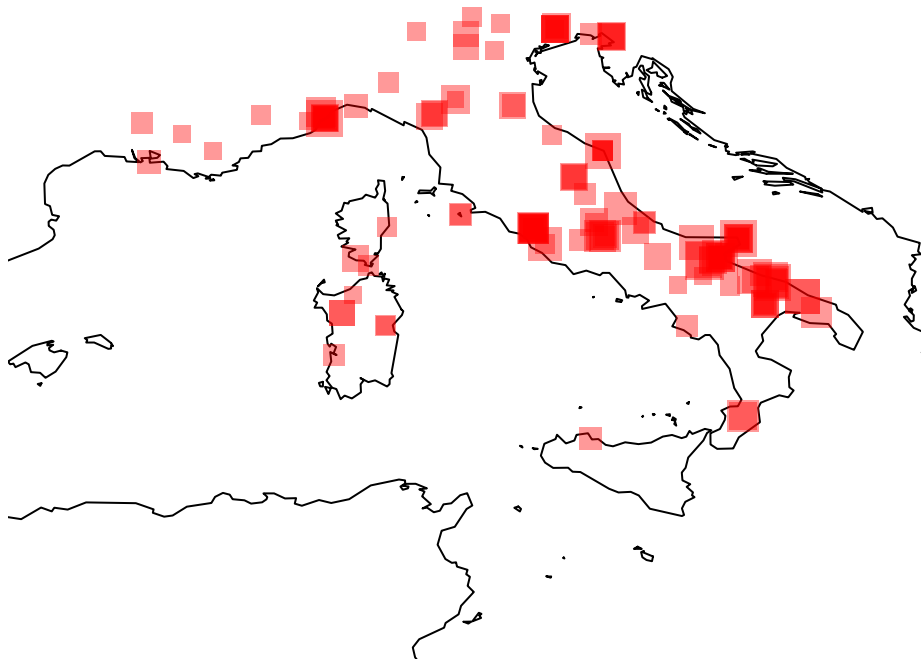

5490 cal. BC

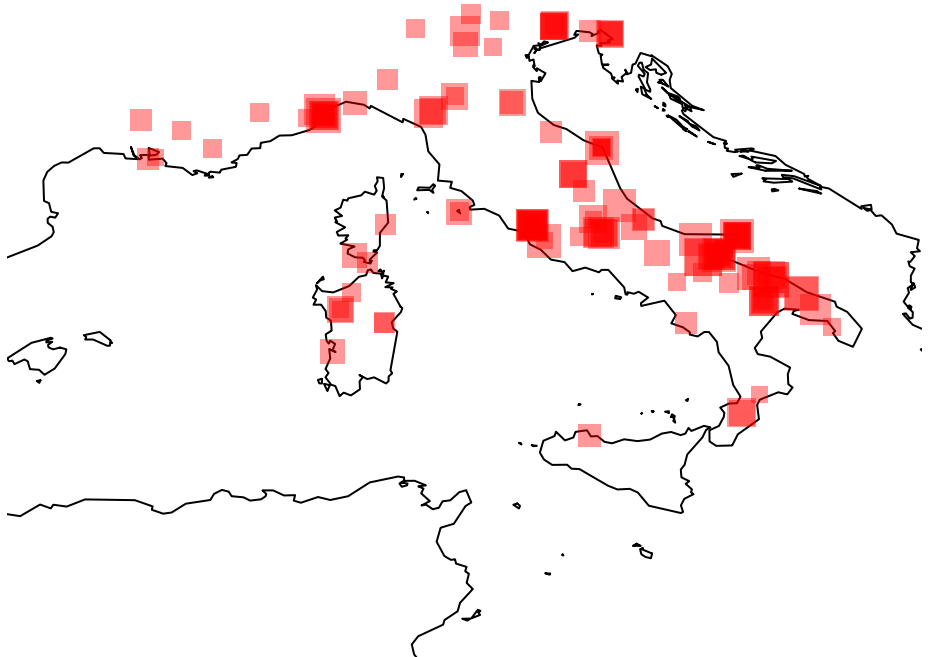



5485 cal. BC

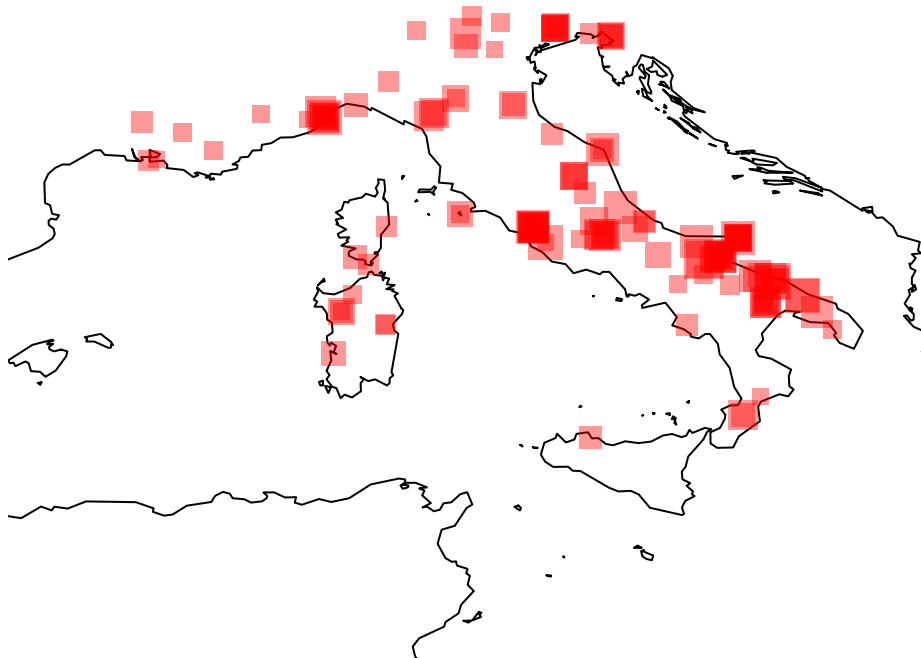

5480 cal. BC

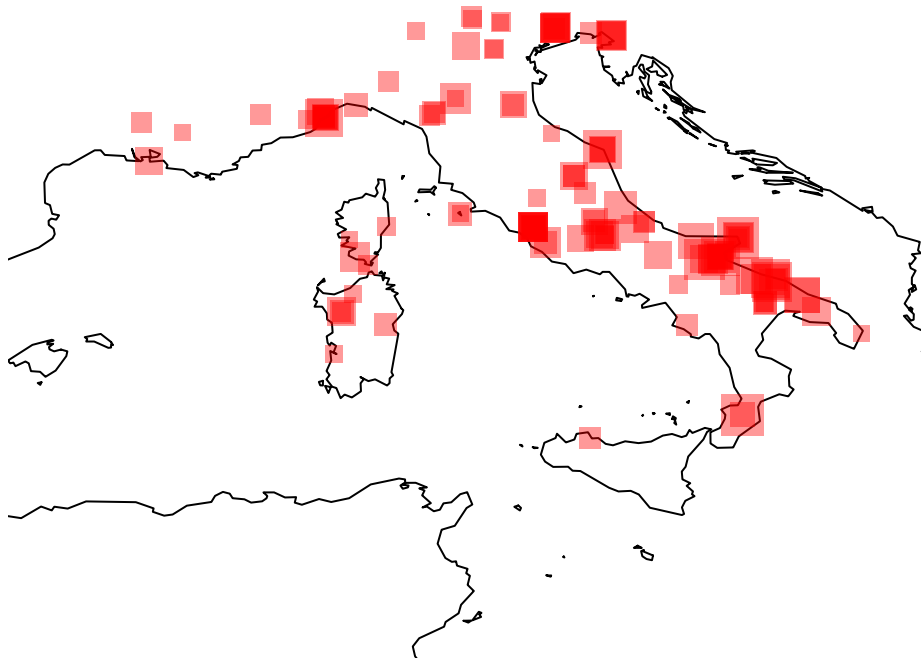

5475 cal. BC

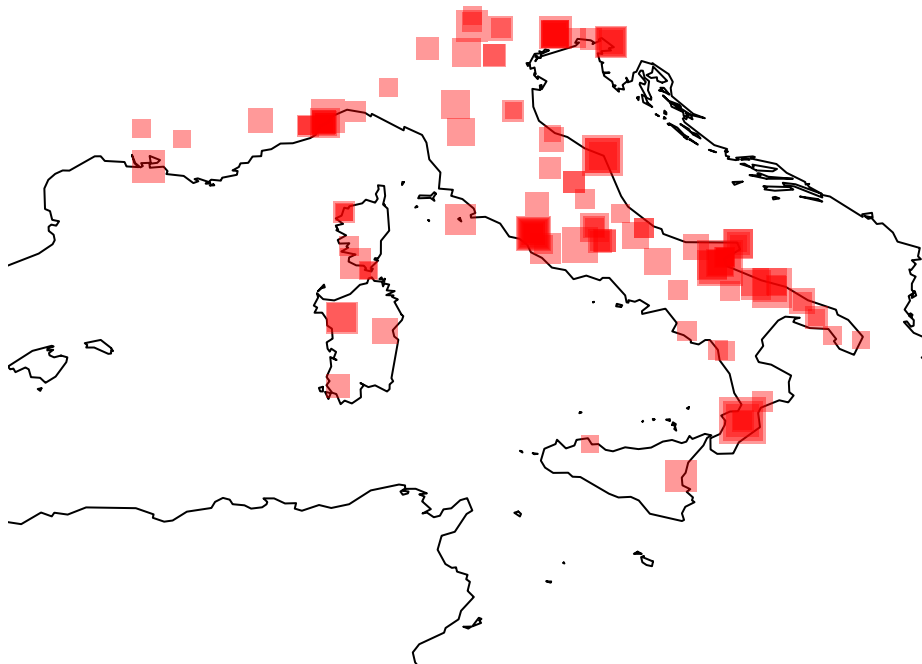

5470 cal. BC

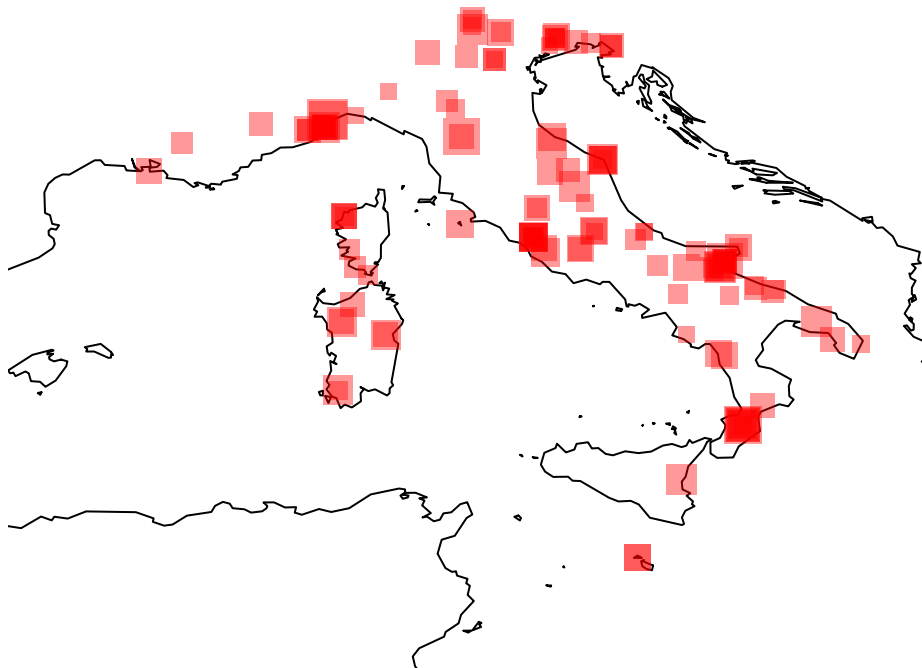

5465 cal. BC

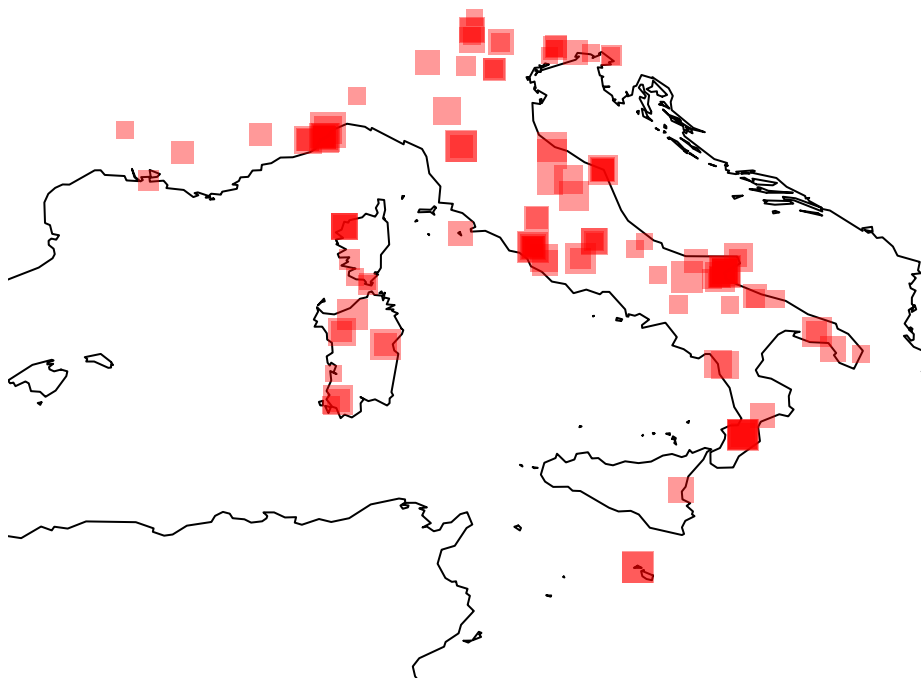

5460 cal. BC

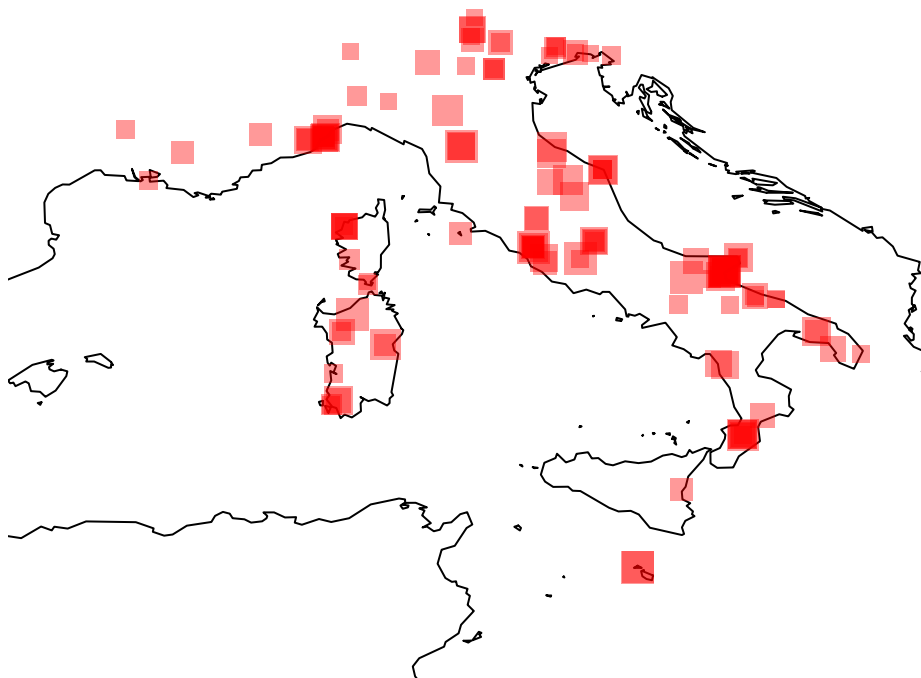

5455 cal. BC

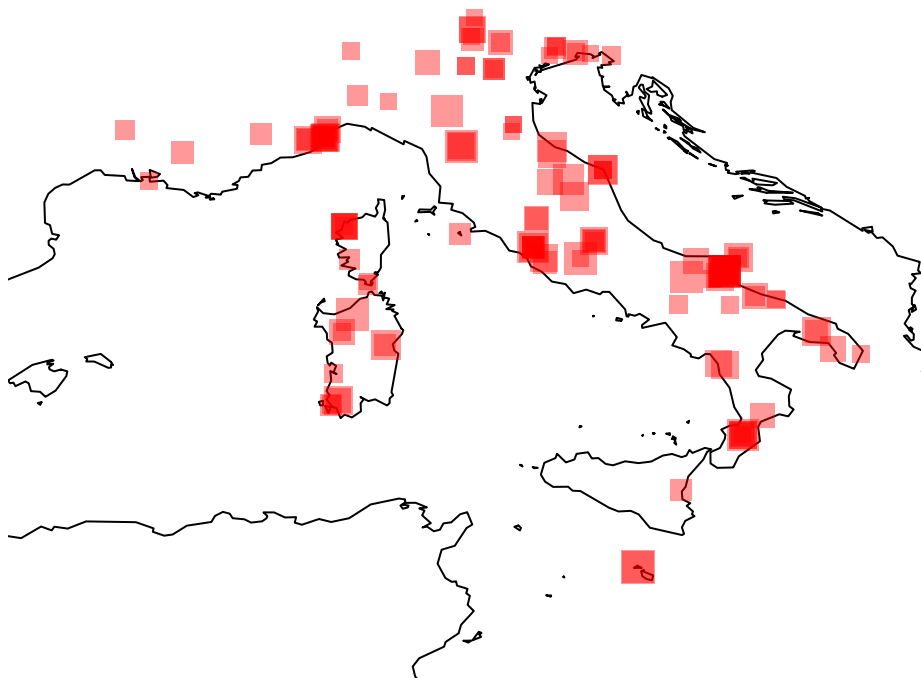

5450 cal. BC

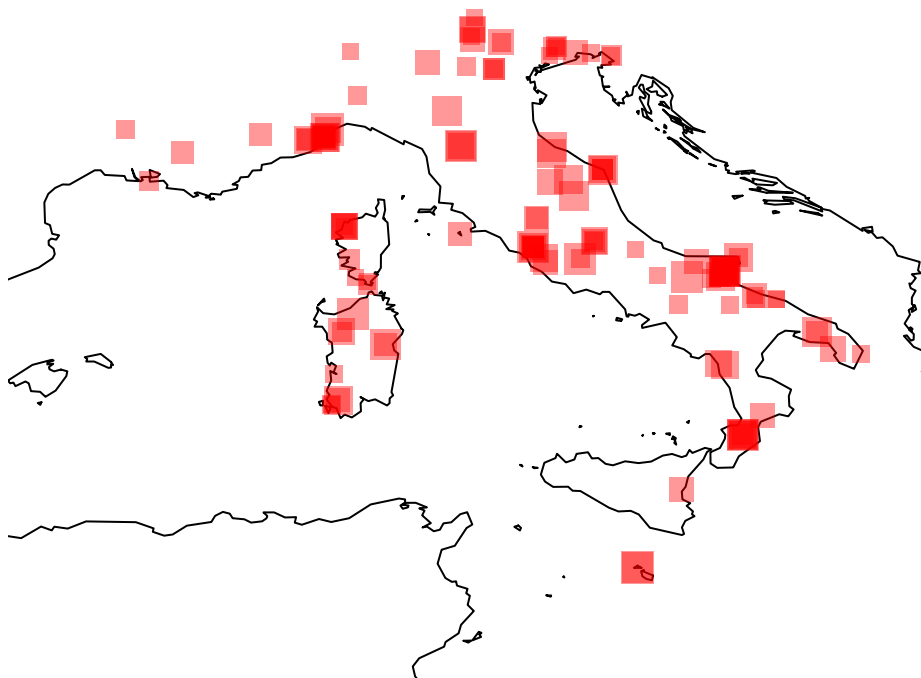



5445 cal. BC

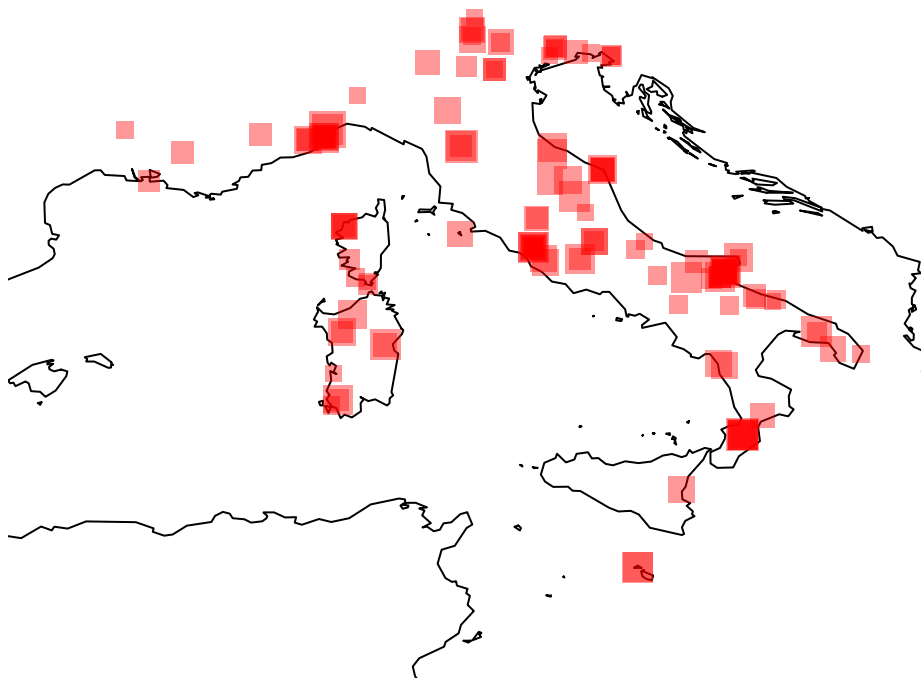

5440 cal. BC

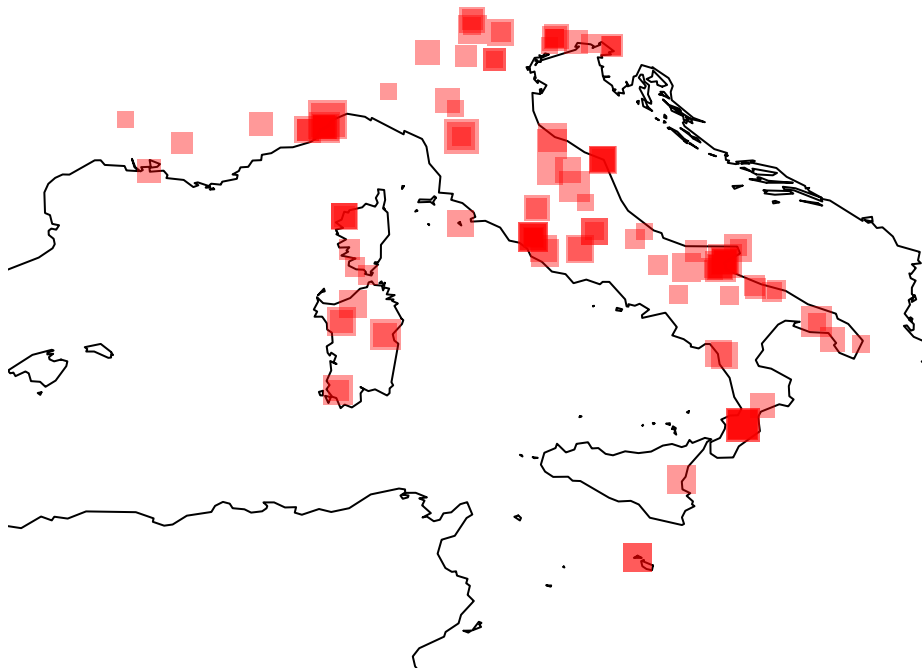

5435 cal. BC

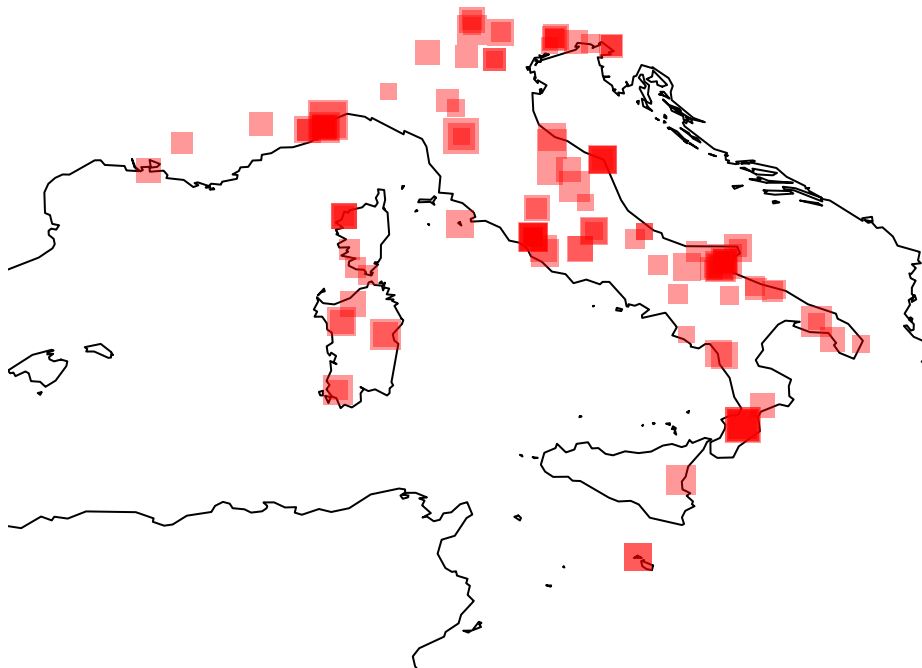

5430 cal. BC

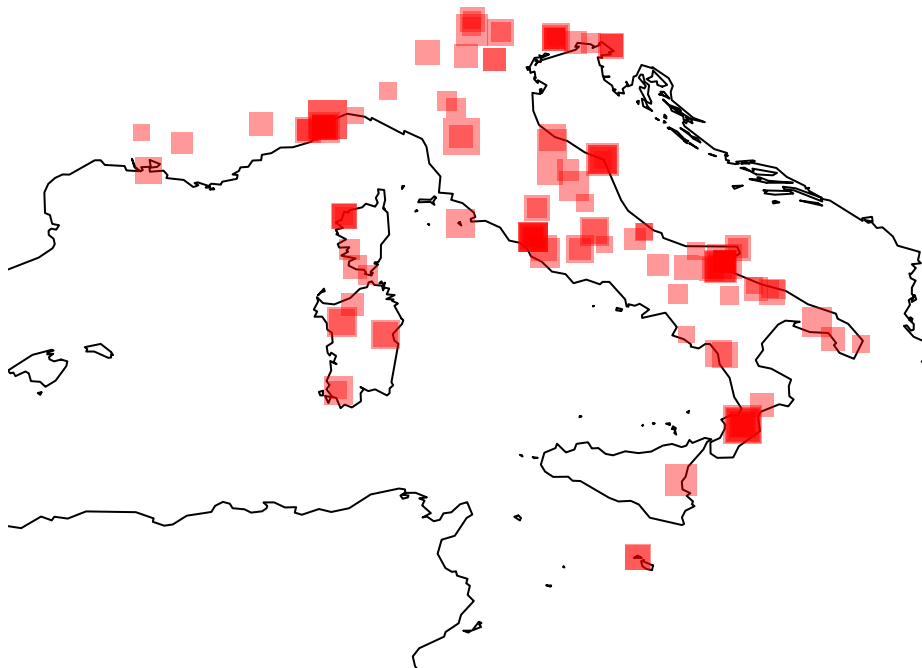

5425 cal. BC

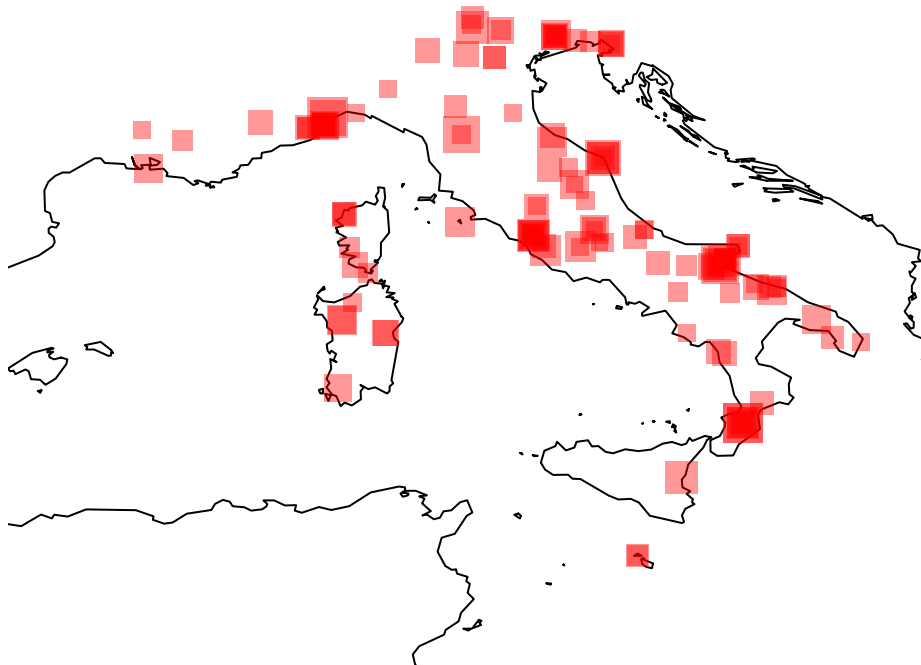

5420 cal. BC

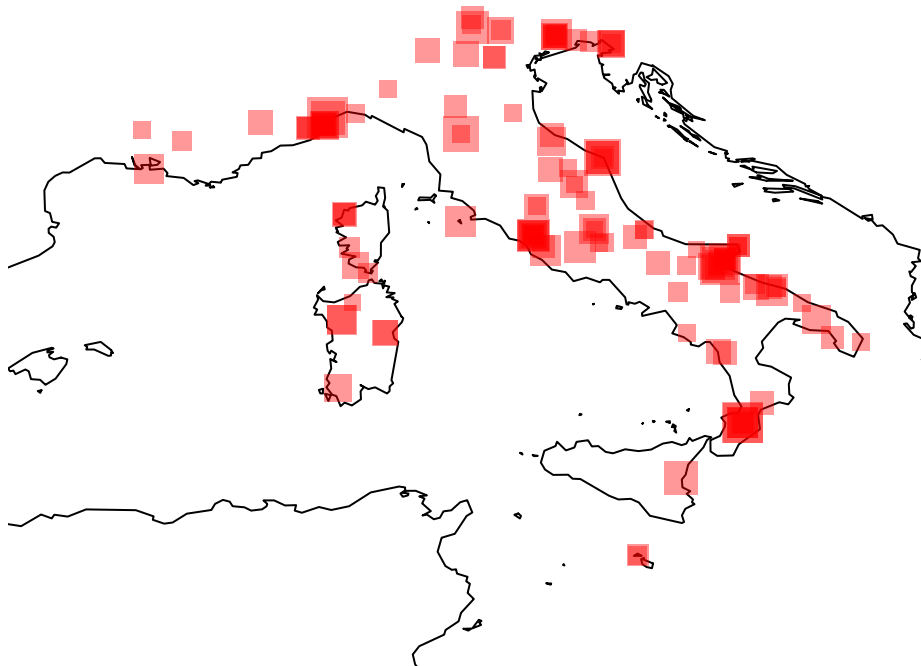

5415 cal. BC

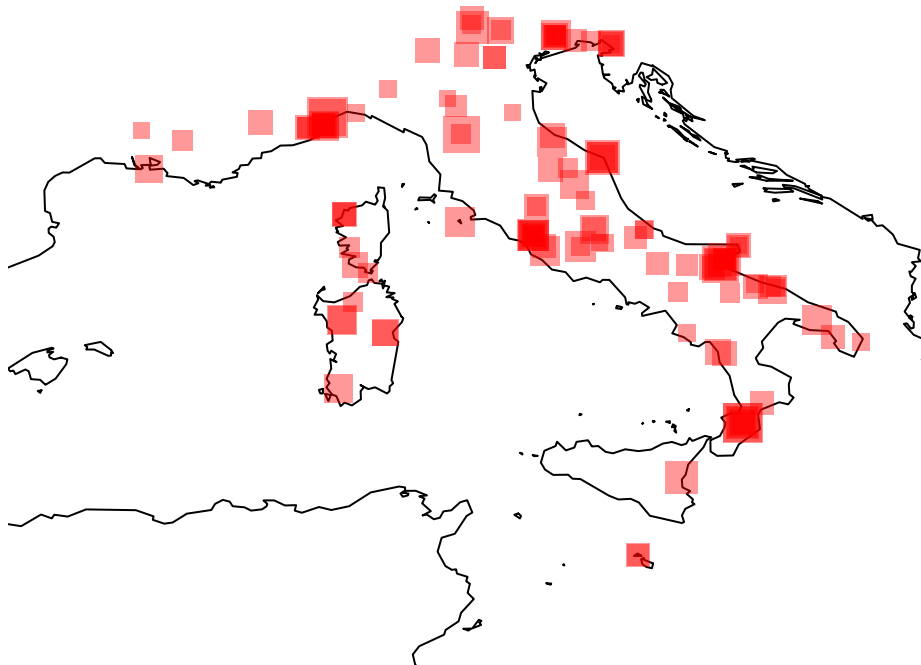

5410 cal. BC

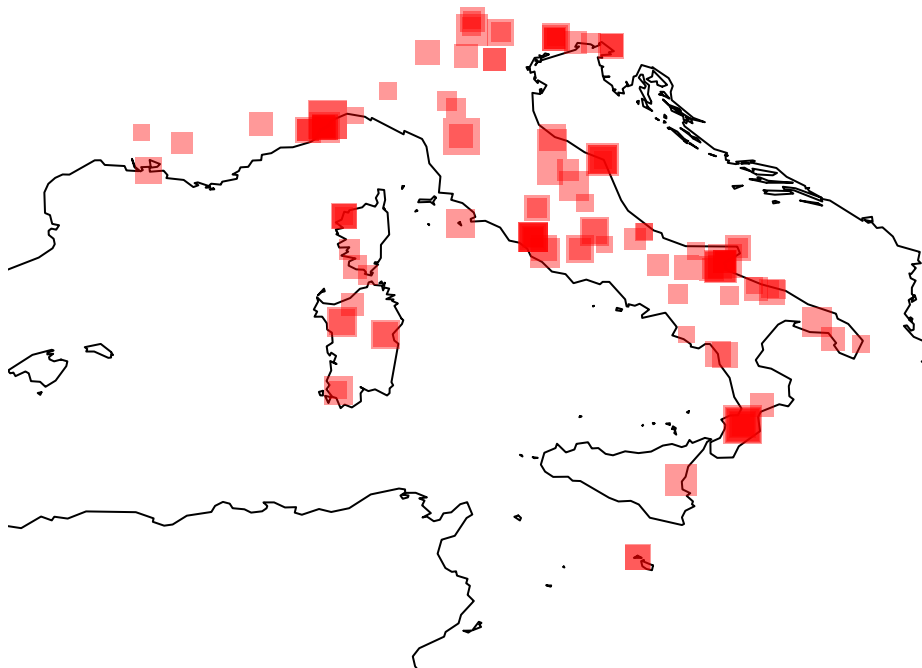



5405 cal. BC

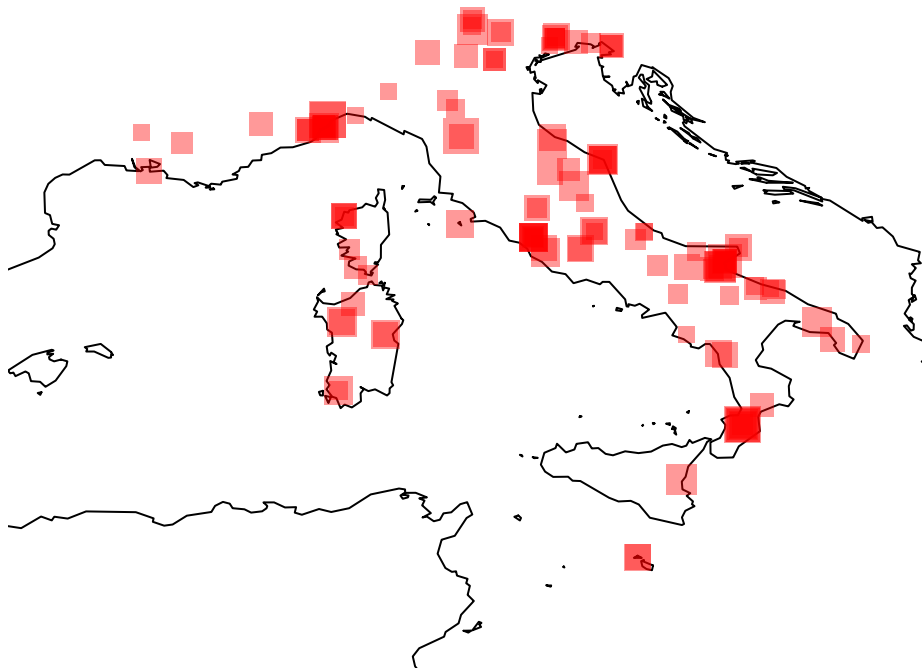

5400 cal. BC



5395 cal. BC

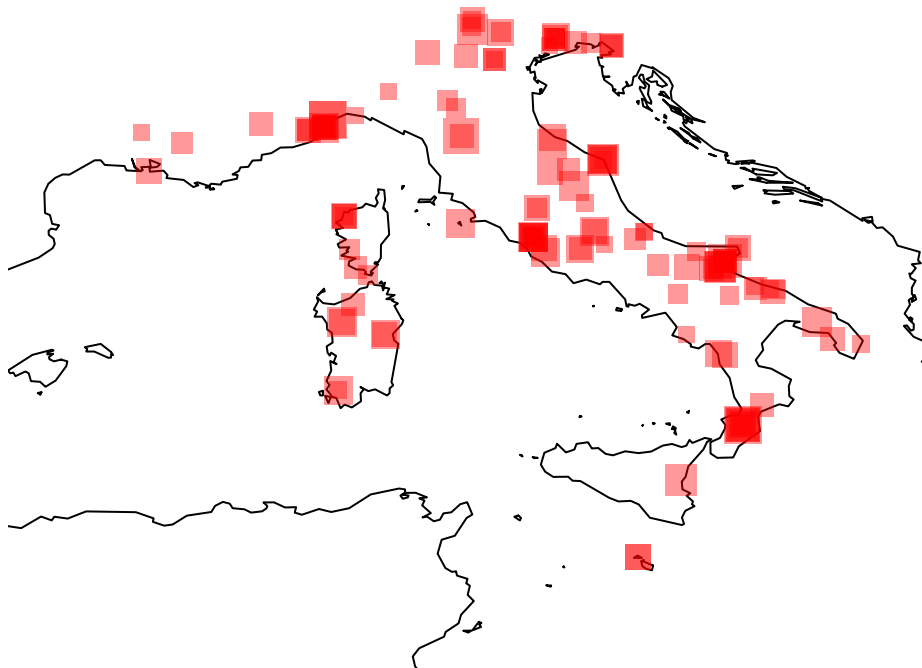

5390 cal. BC

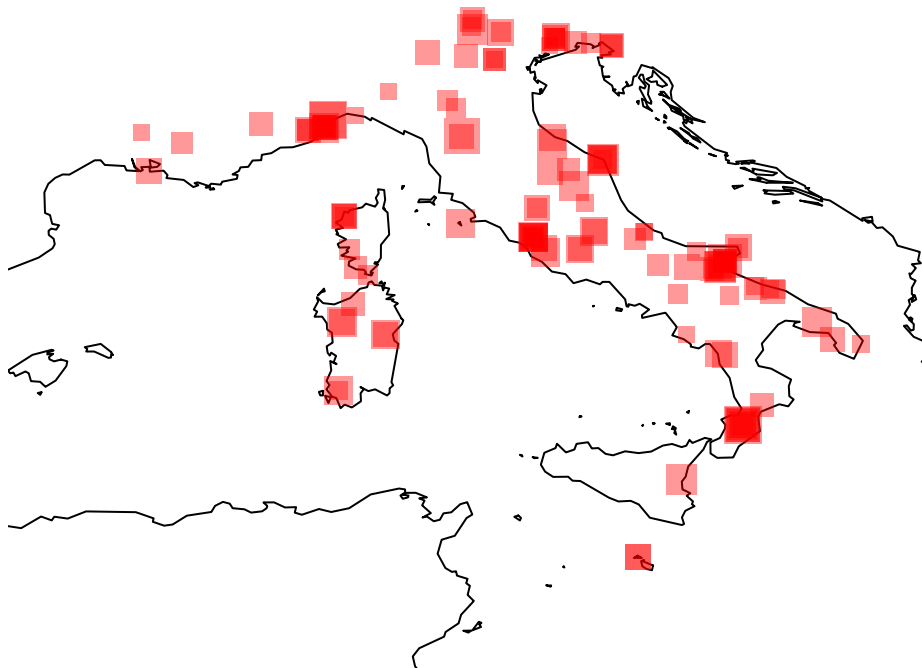

5385 cal. BC

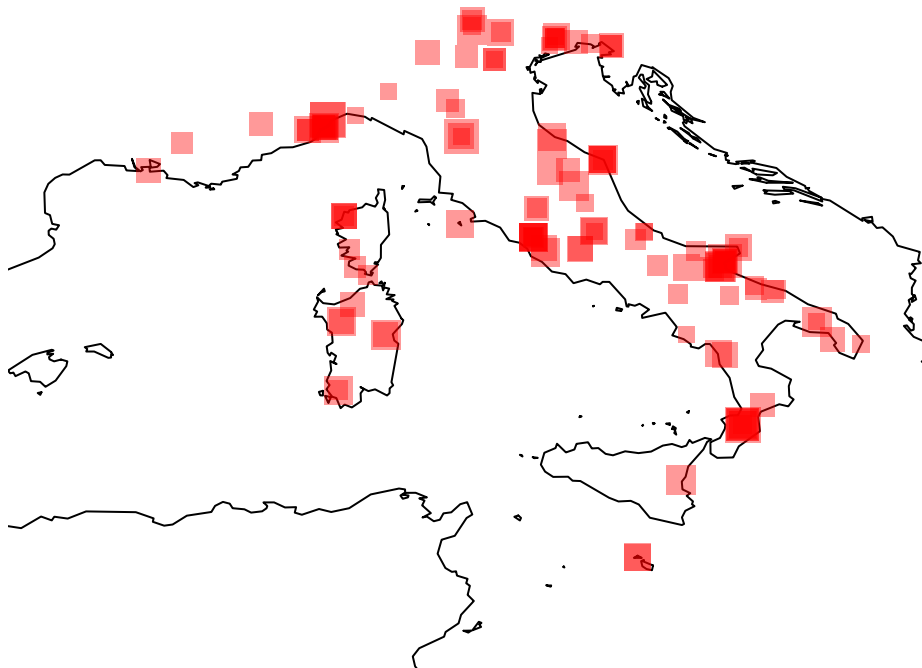

5380 cal. BC

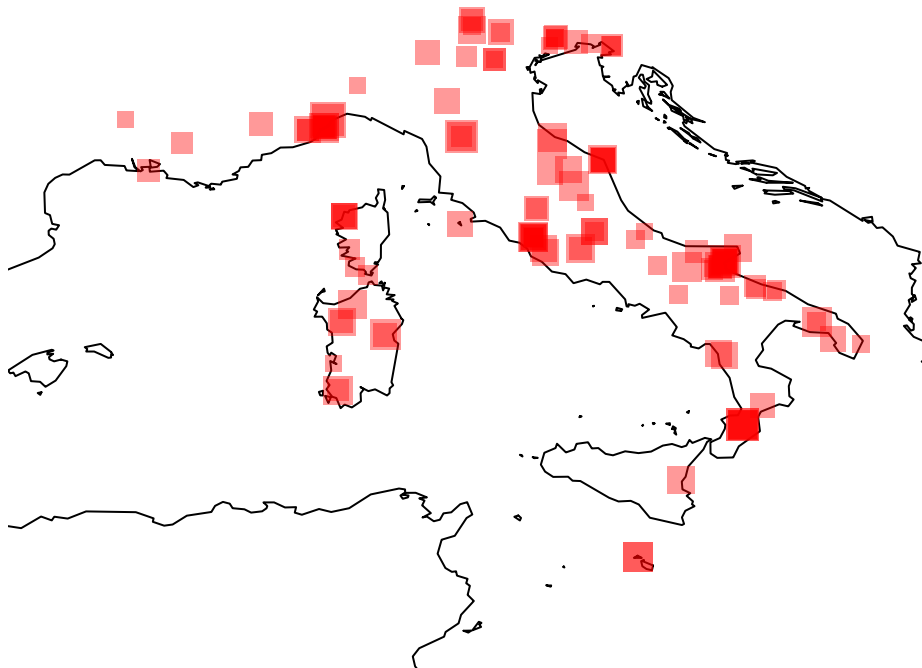

5375 cal. BC

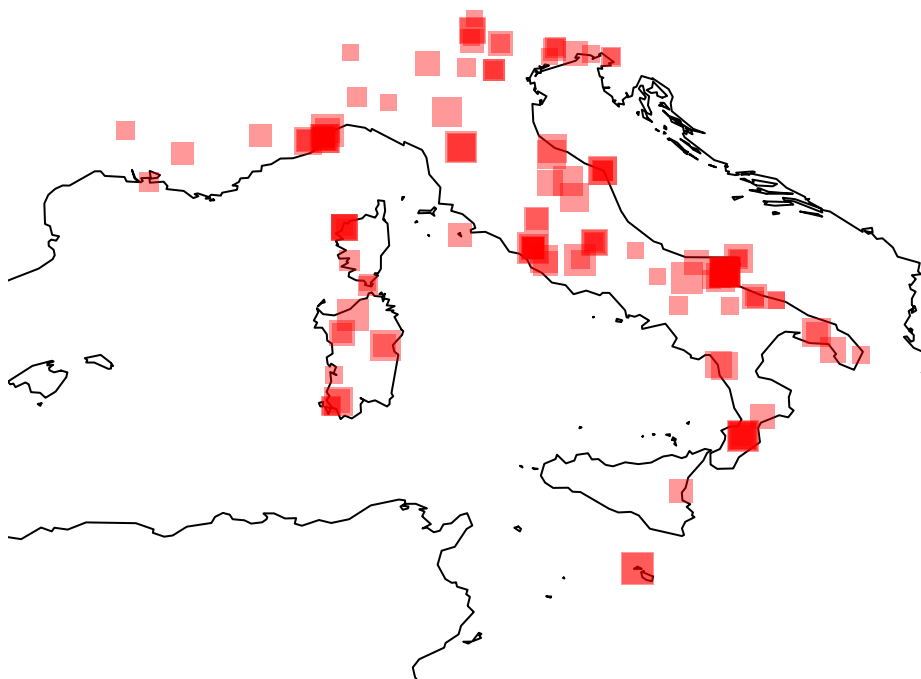

5370 cal. BC

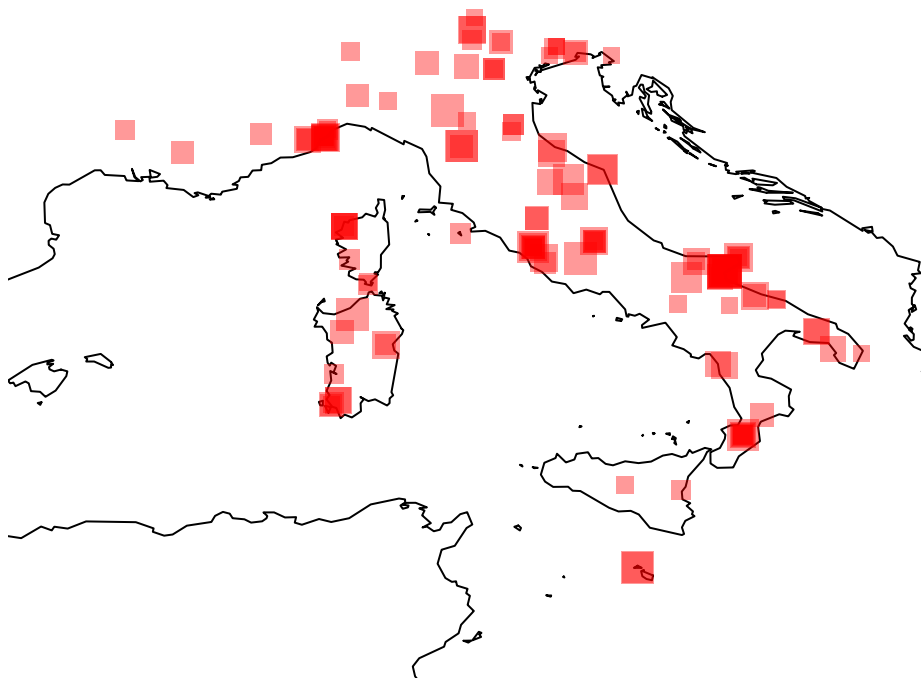





5360 cal. BC

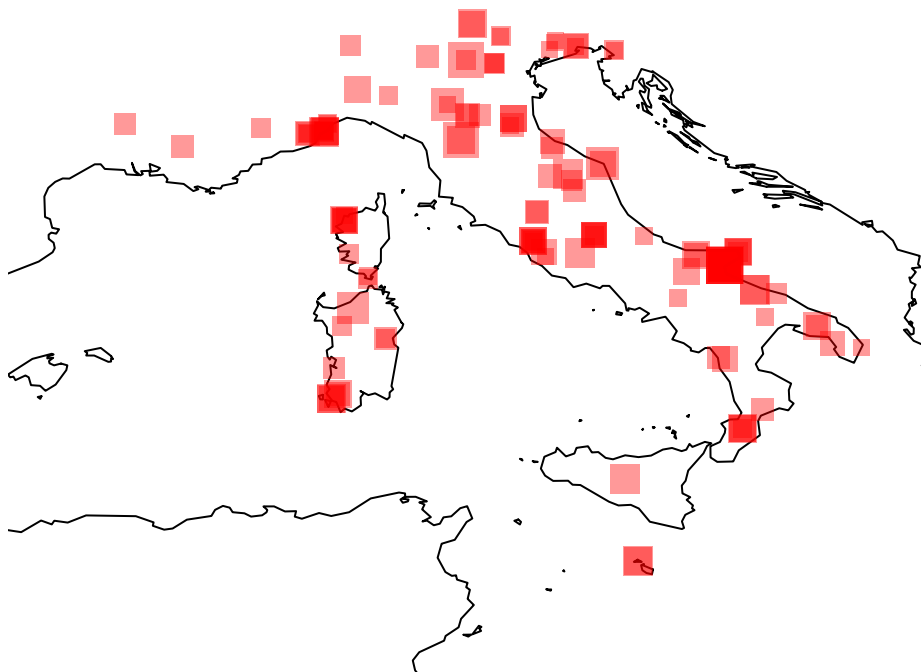

5355 cal. BC

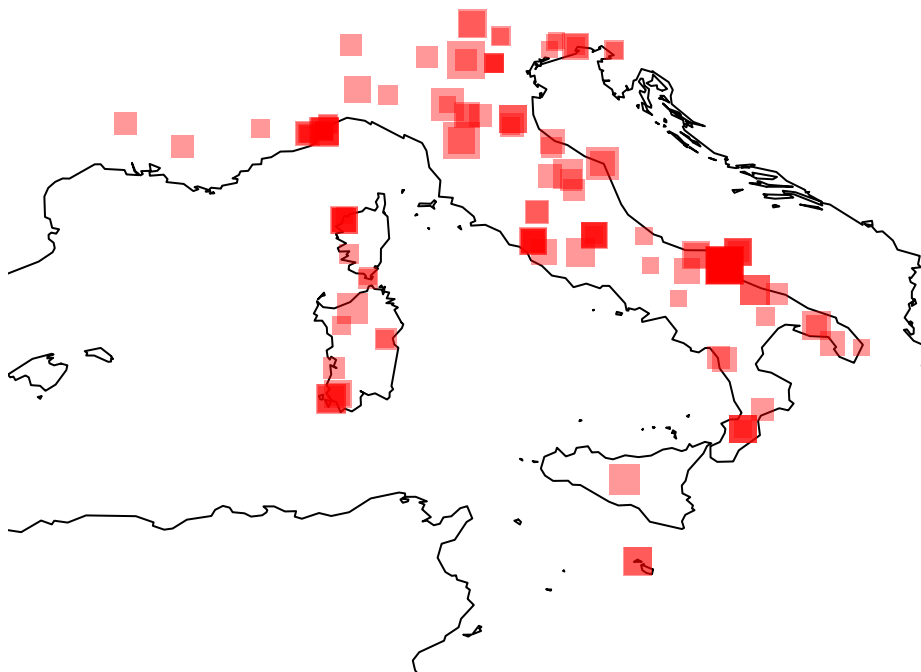

5350 cal. BC



5345 cal. BC

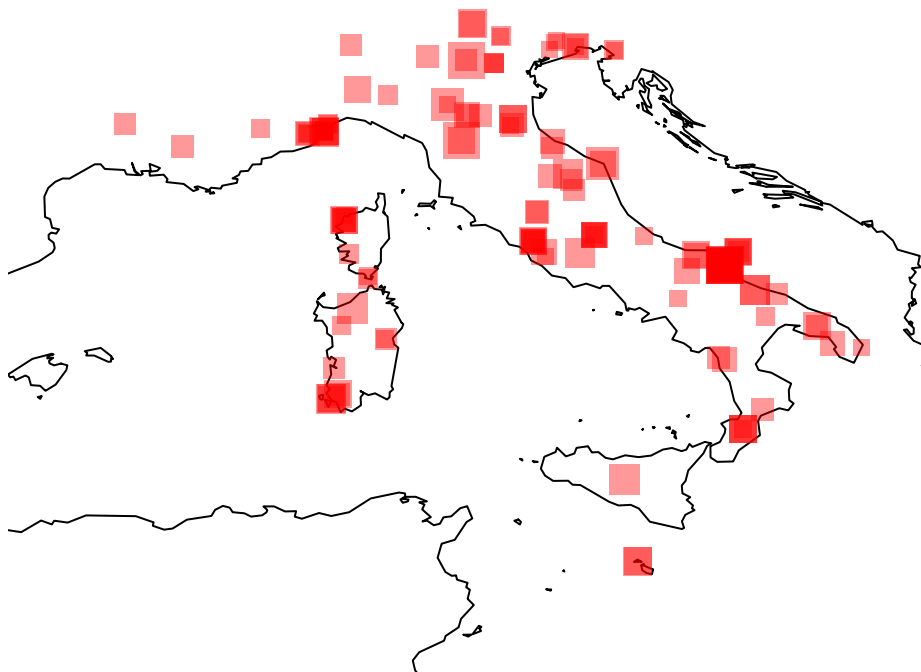

5340 cal. BC

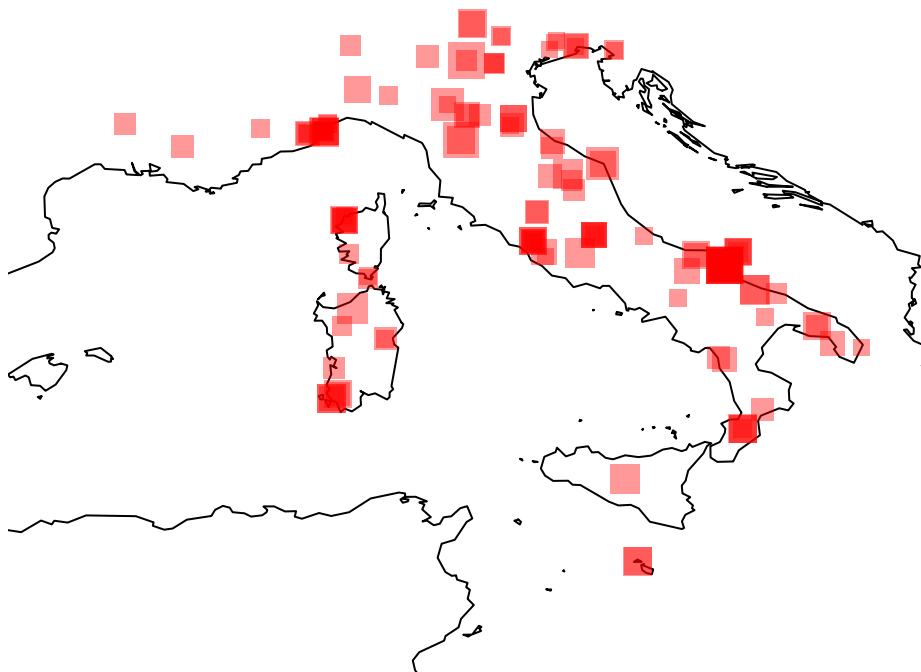

5335 cal. BC



5330 cal. BC

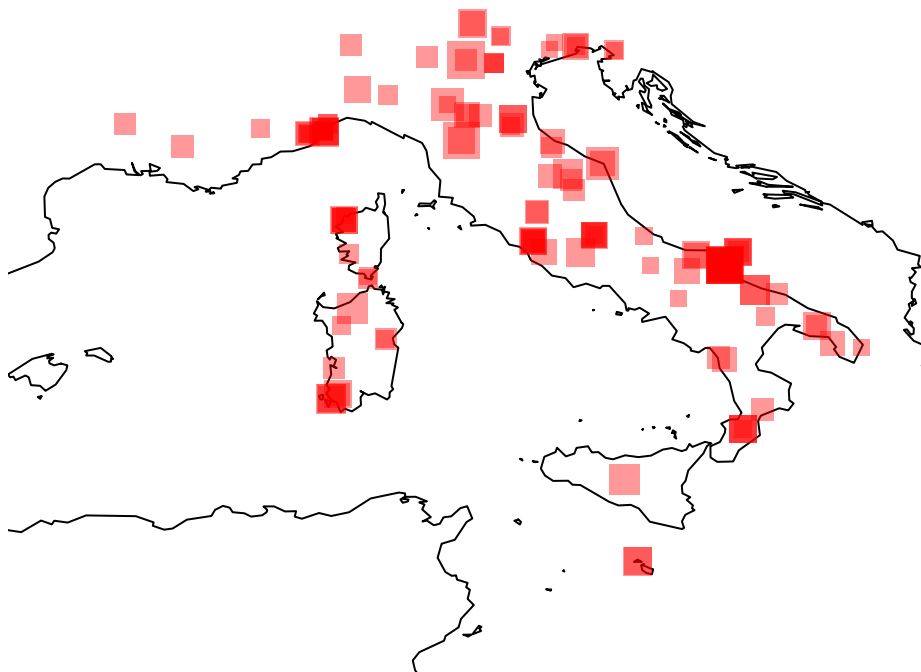



5325 cal. BC

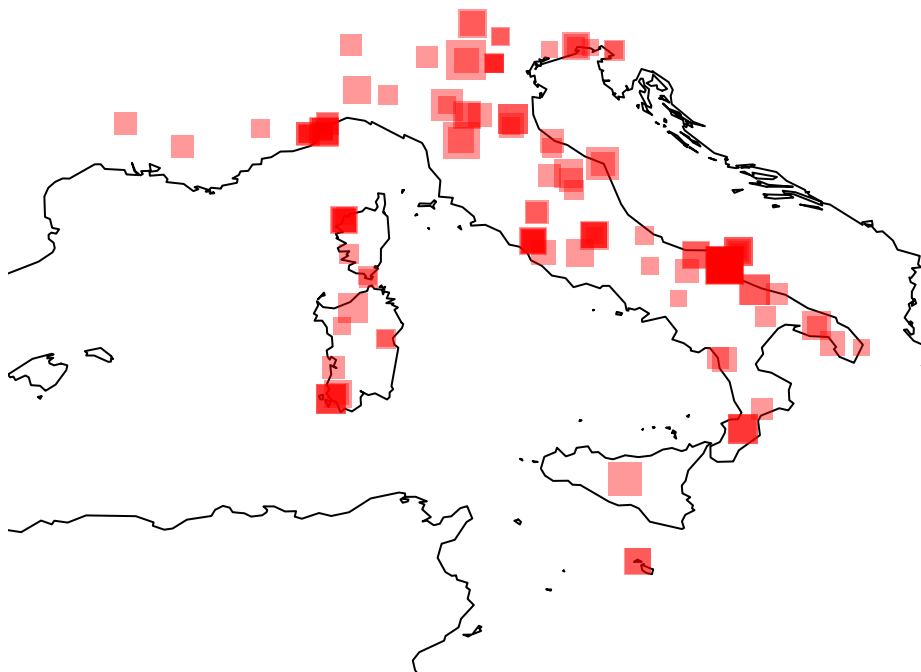

5320 cal. BC

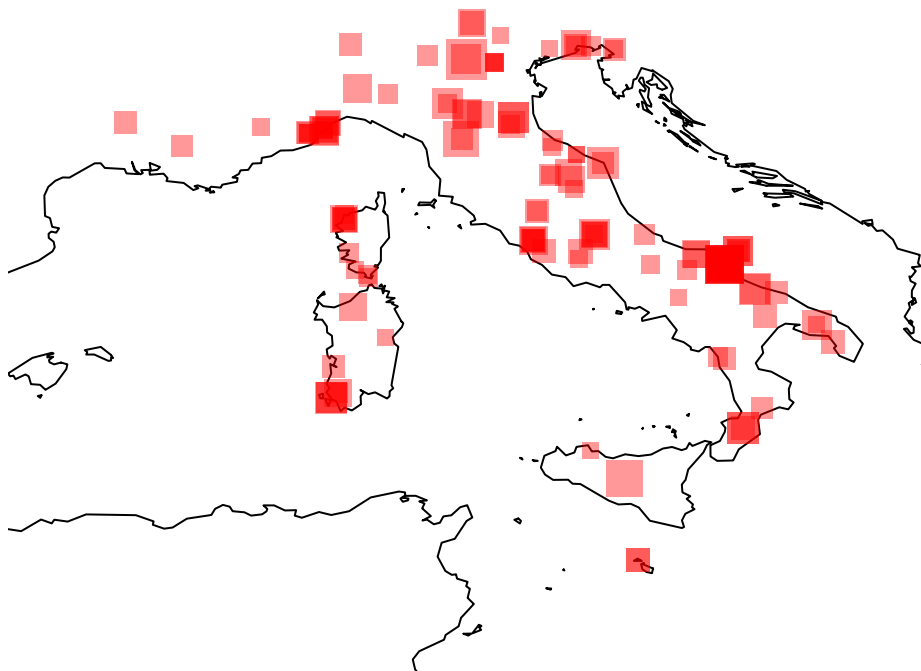

5315 cal. BC

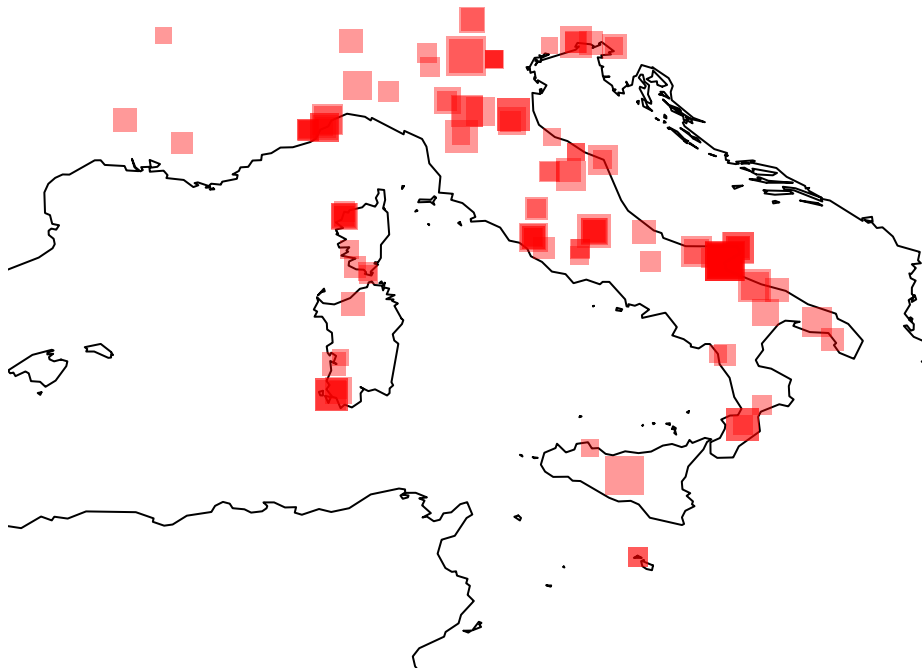

5310 cal. BC

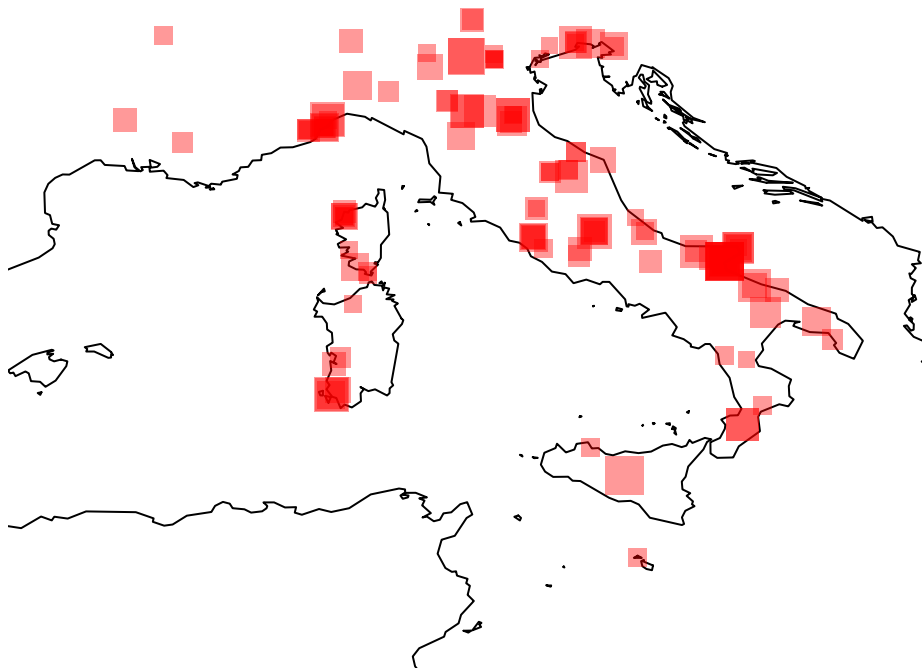

5305 cal. BC

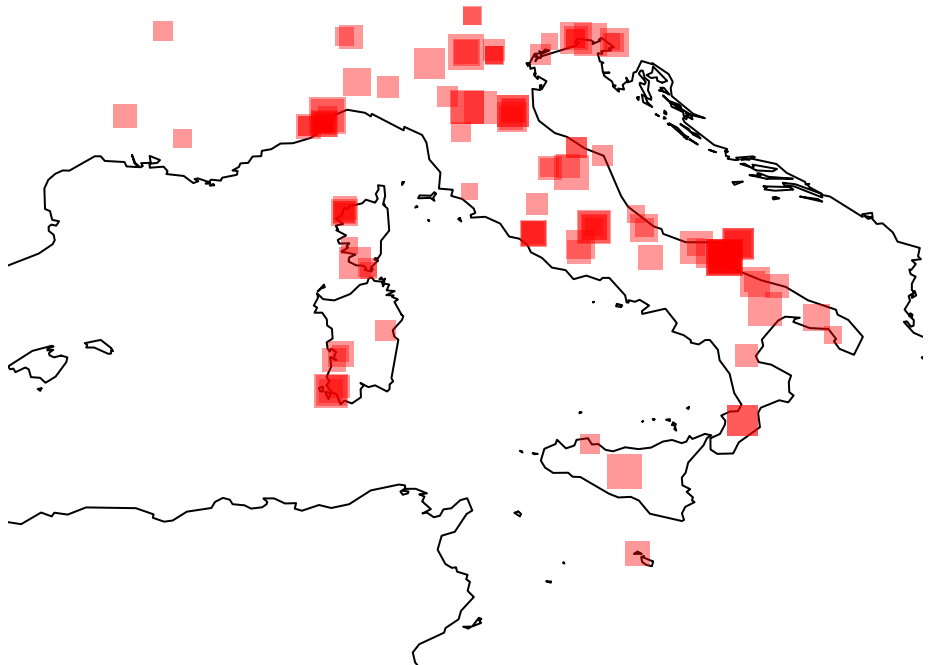

5300 cal. BC

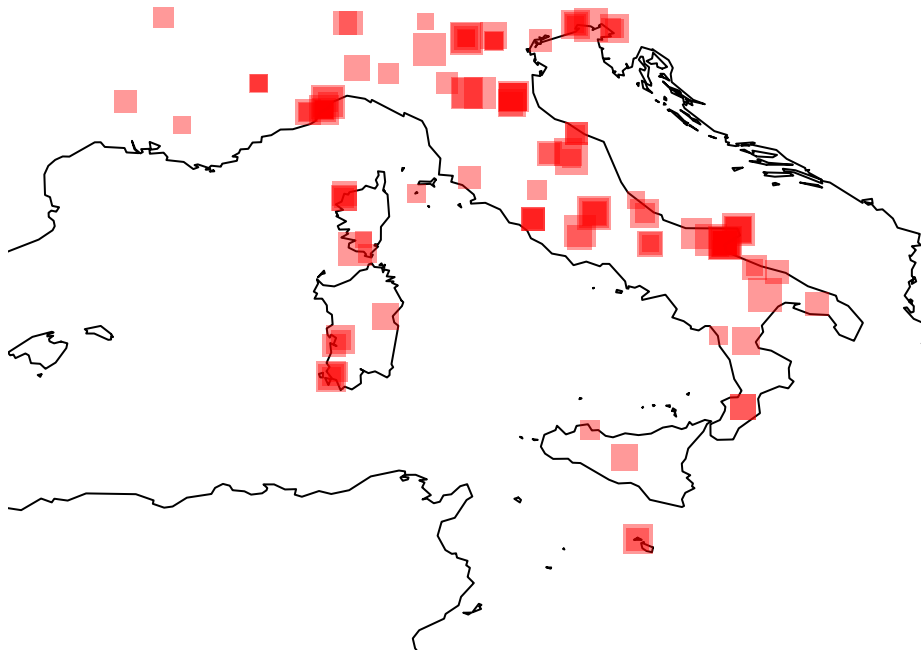

5295 cal. BC

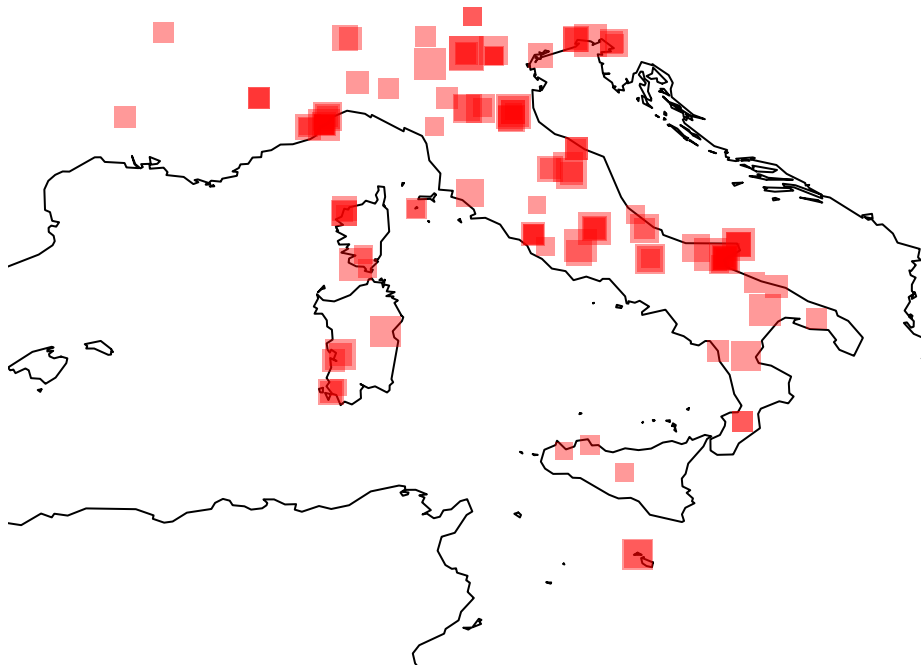

5290 cal. BC

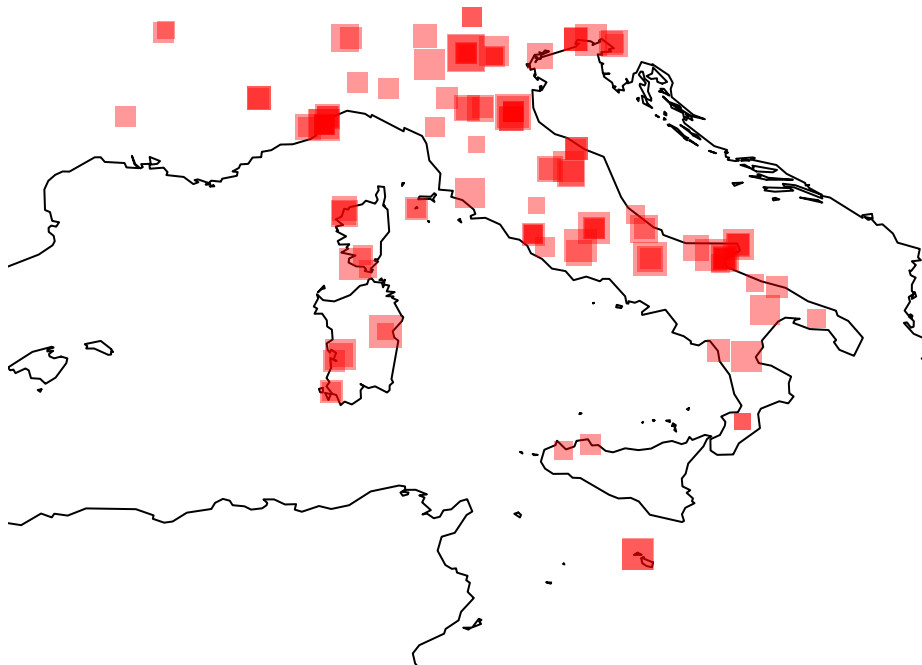



5285 cal. BC

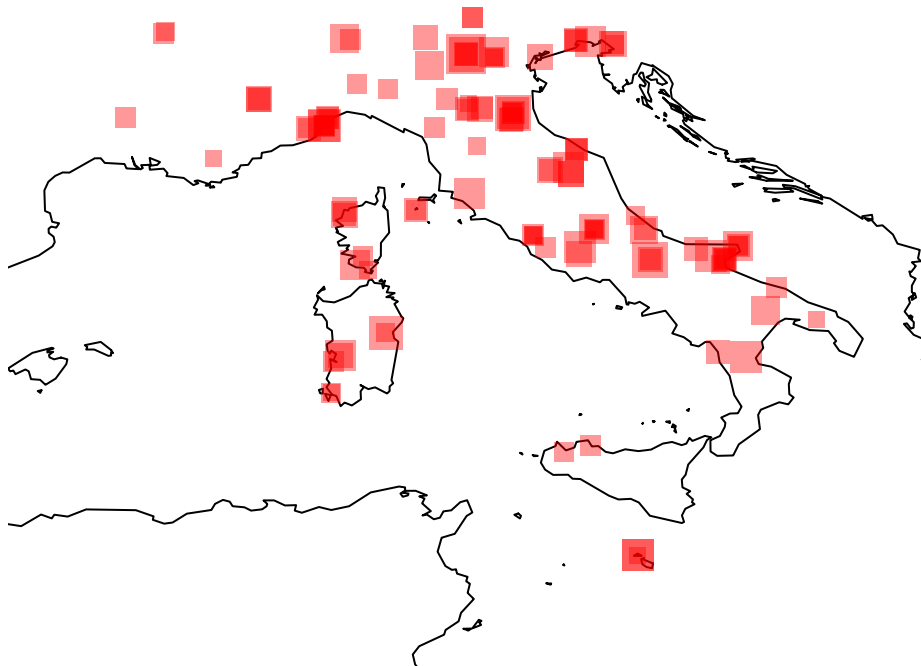

5280 cal. BC

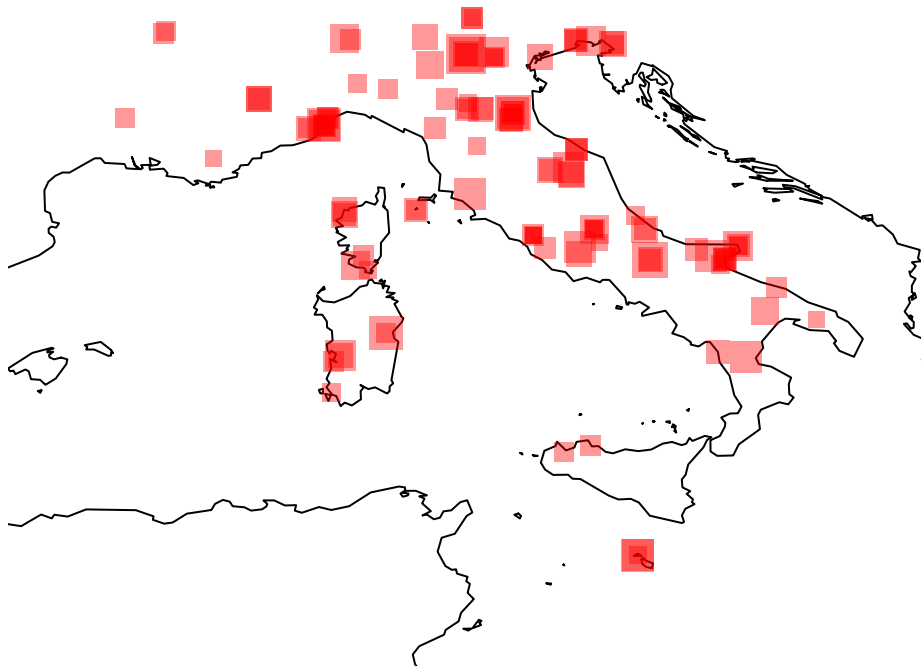

5275 cal. BC

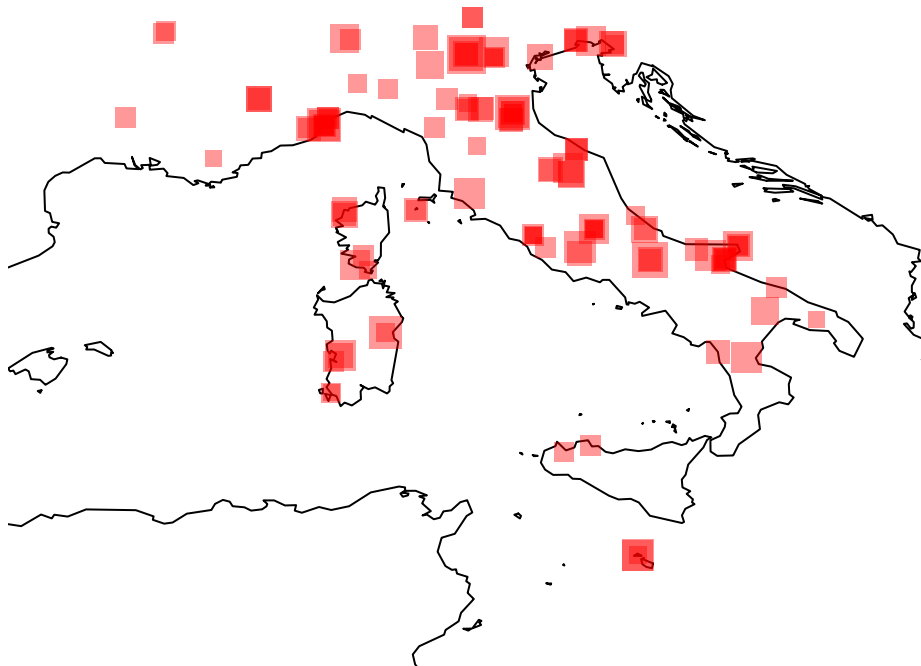

5270 cal. BC

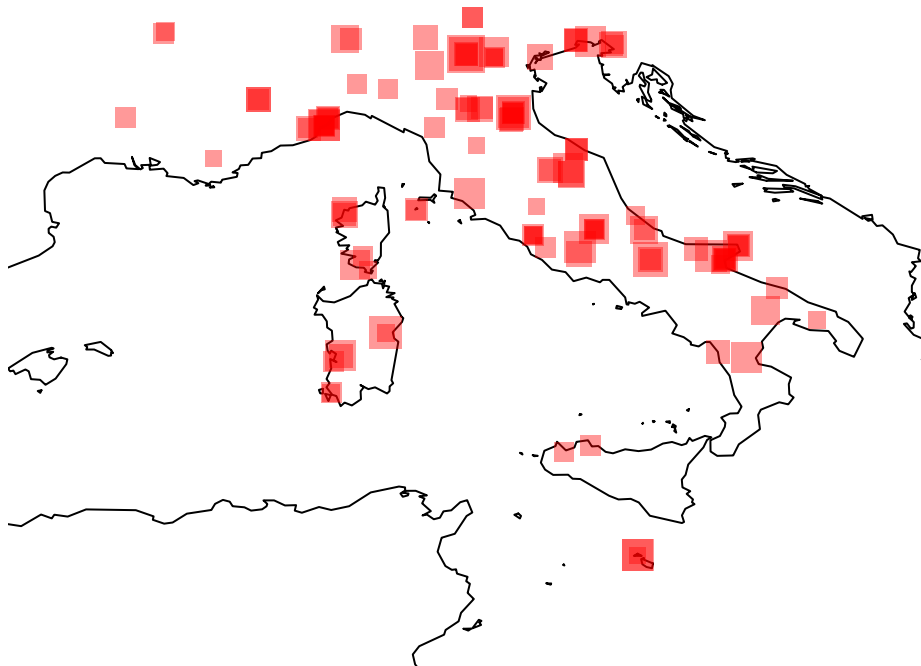

5265 cal. BC

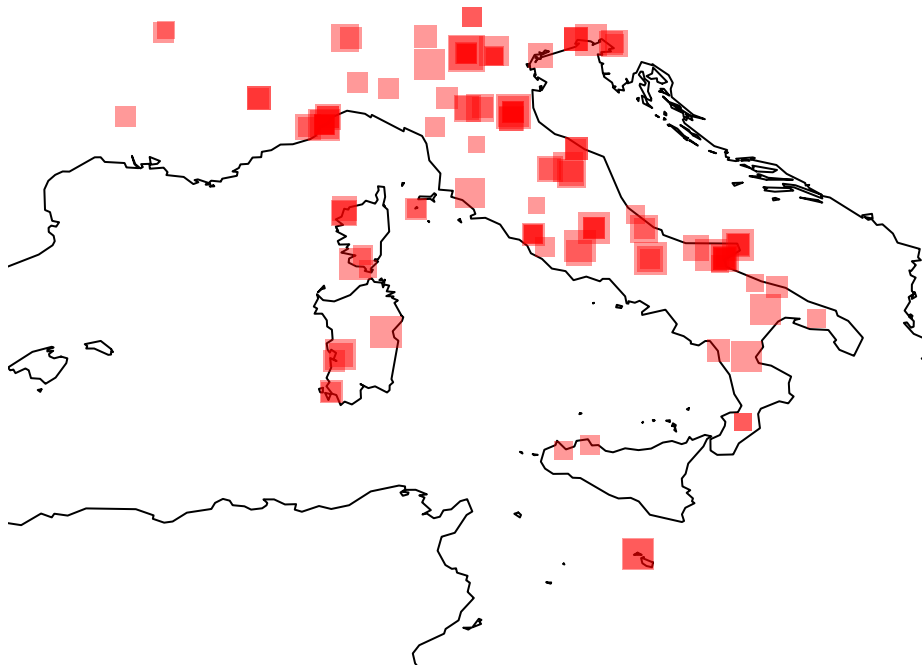

5260 cal. BC

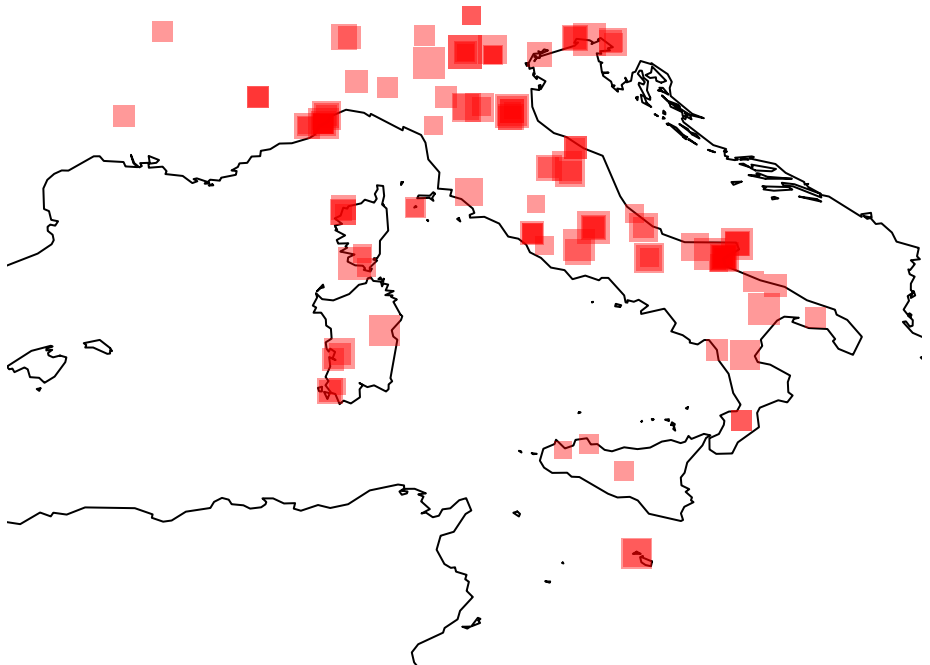

5255 cal. BC

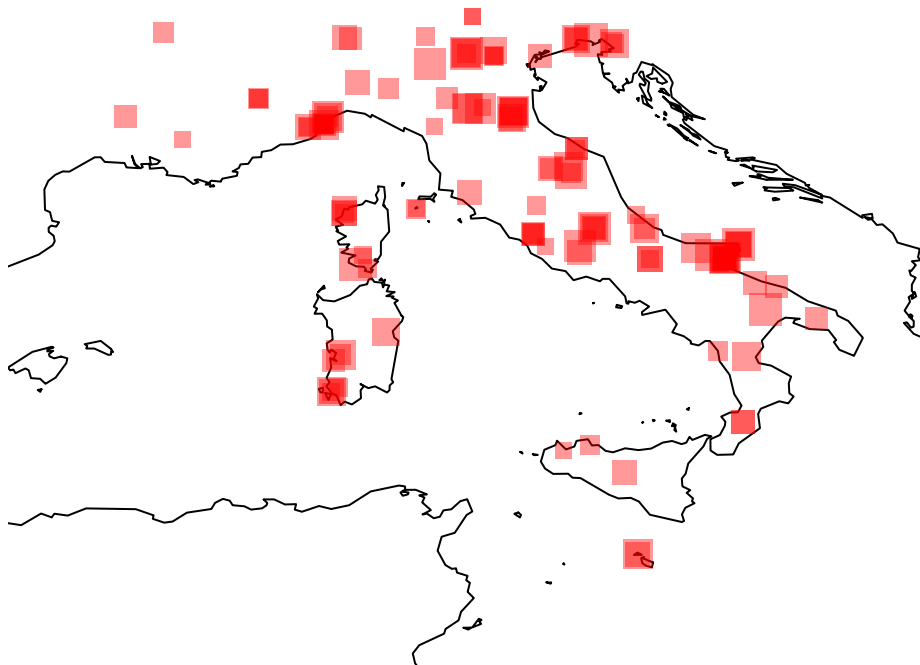

5250 cal. BC

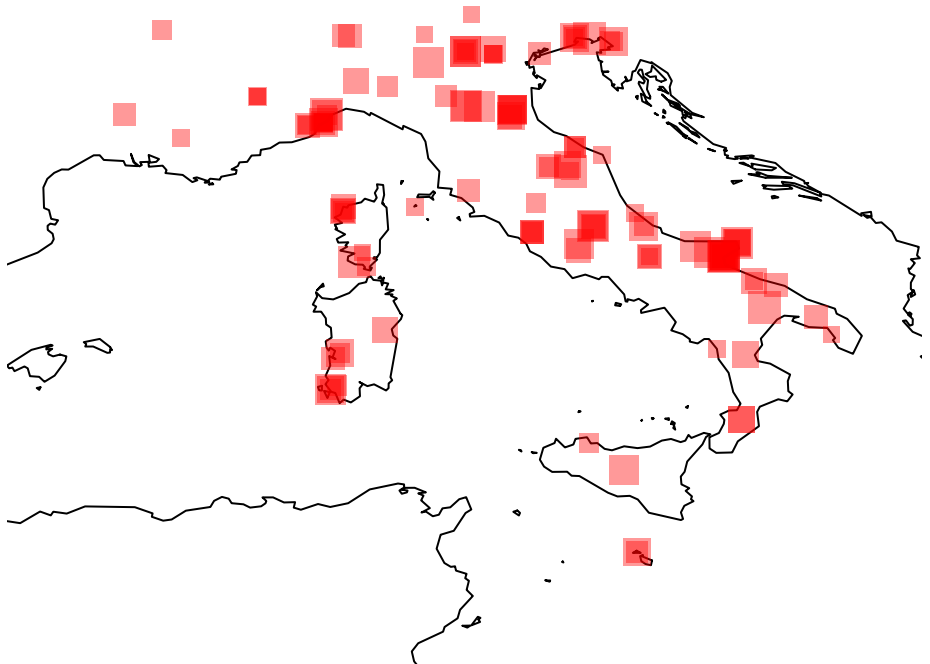



**5245 cal. BC**

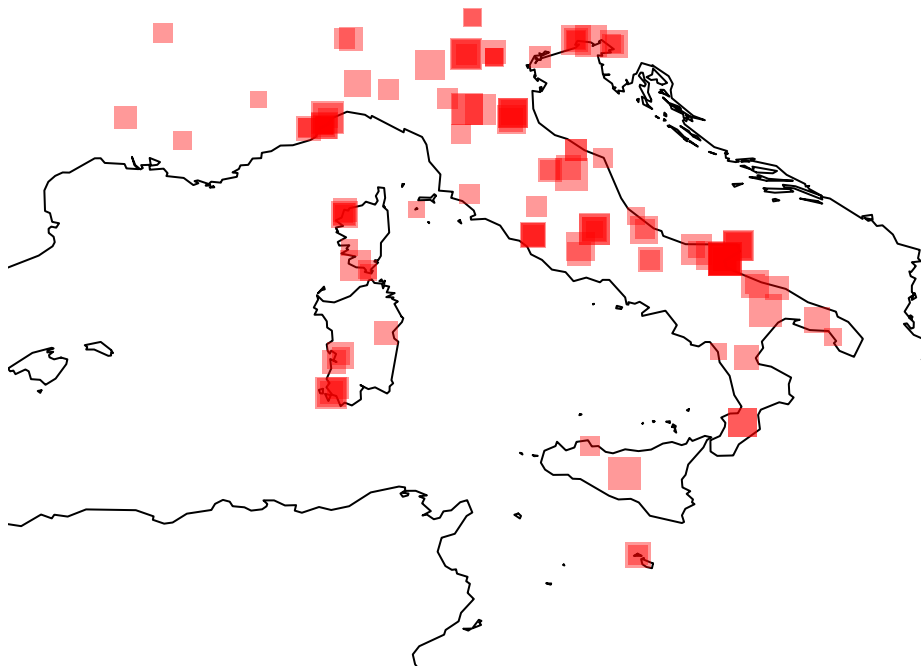

5240 cal. BC

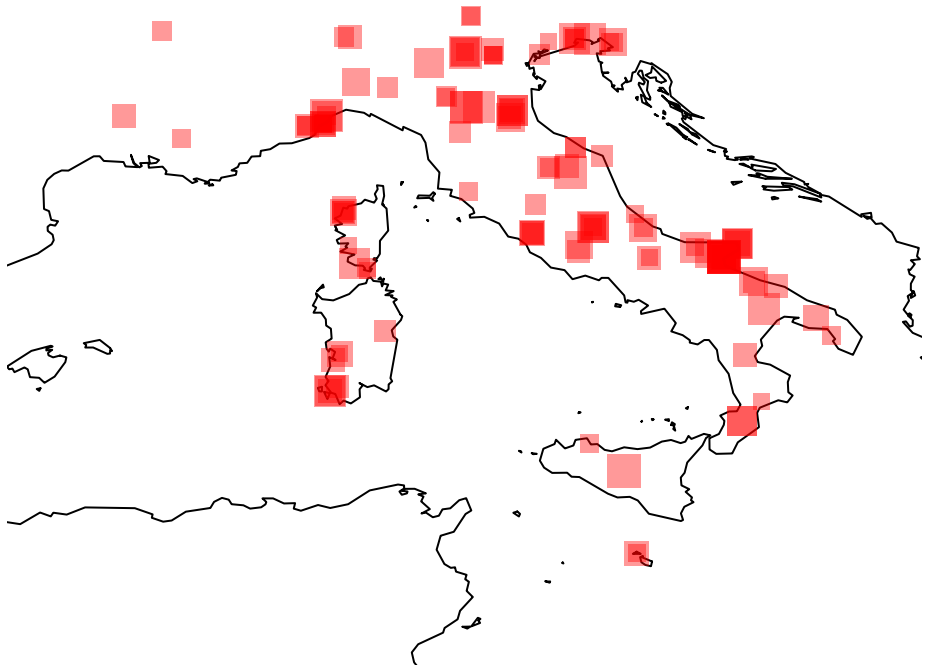

5235 cal. BC

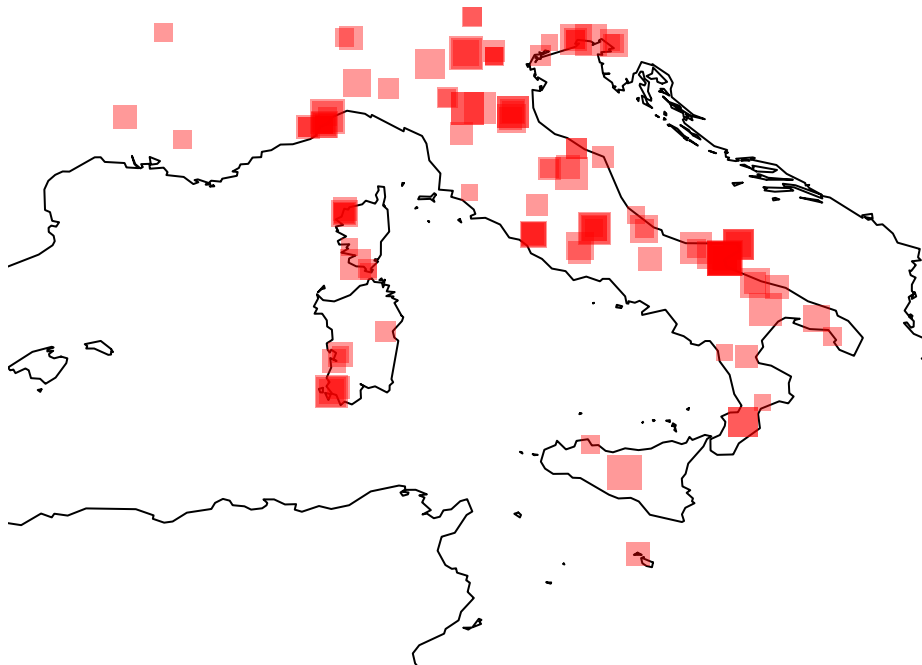

5230 cal. BC

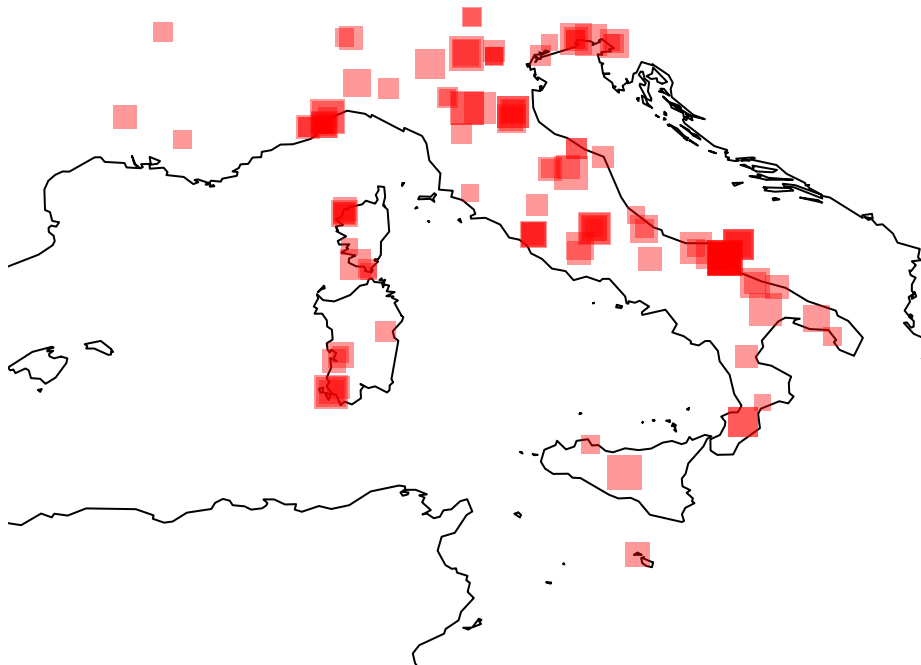

5225 cal. BC

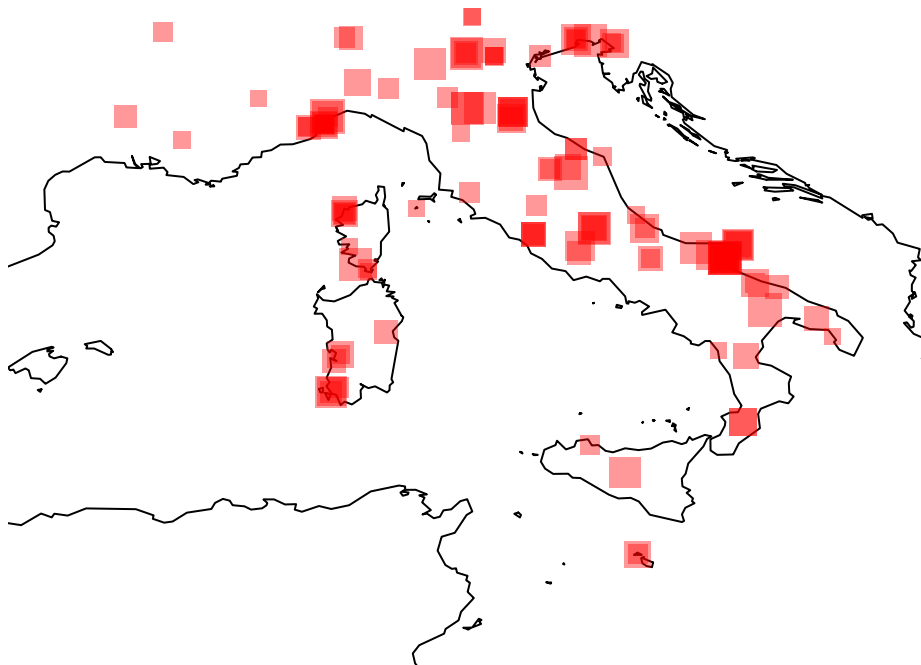

5220 cal. BC

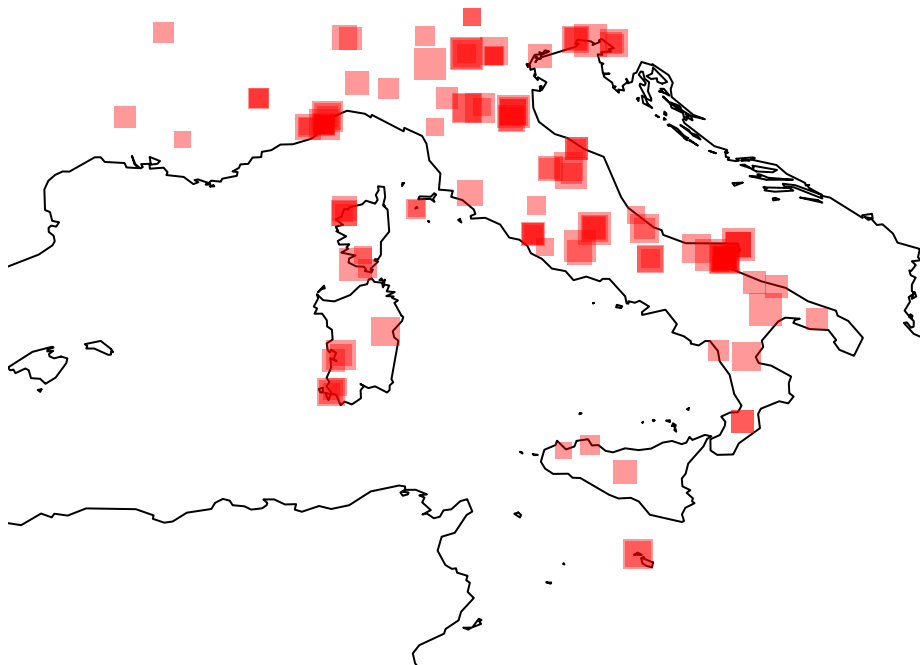

5215 cal. BC

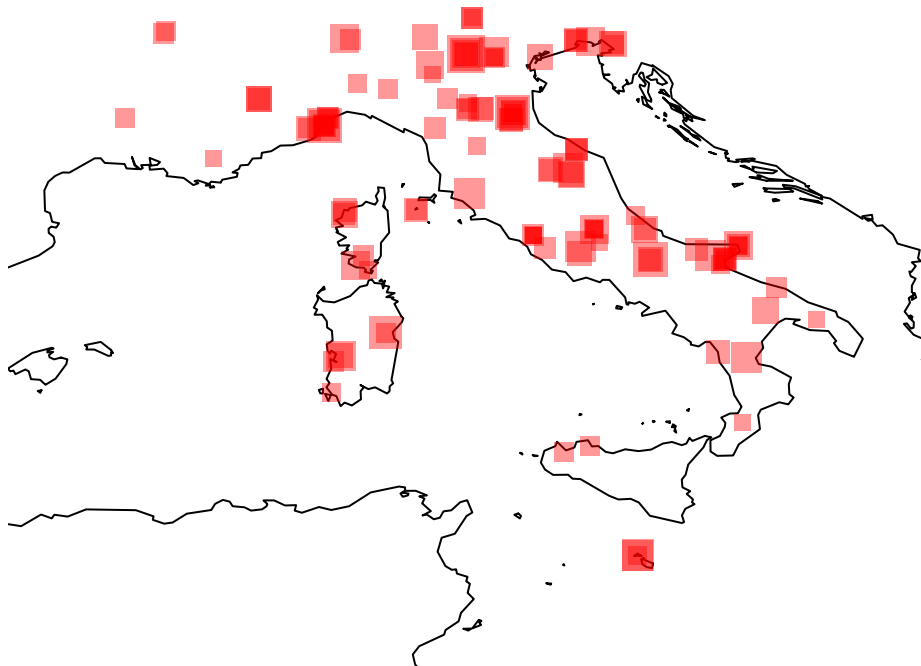

5210 cal. BC

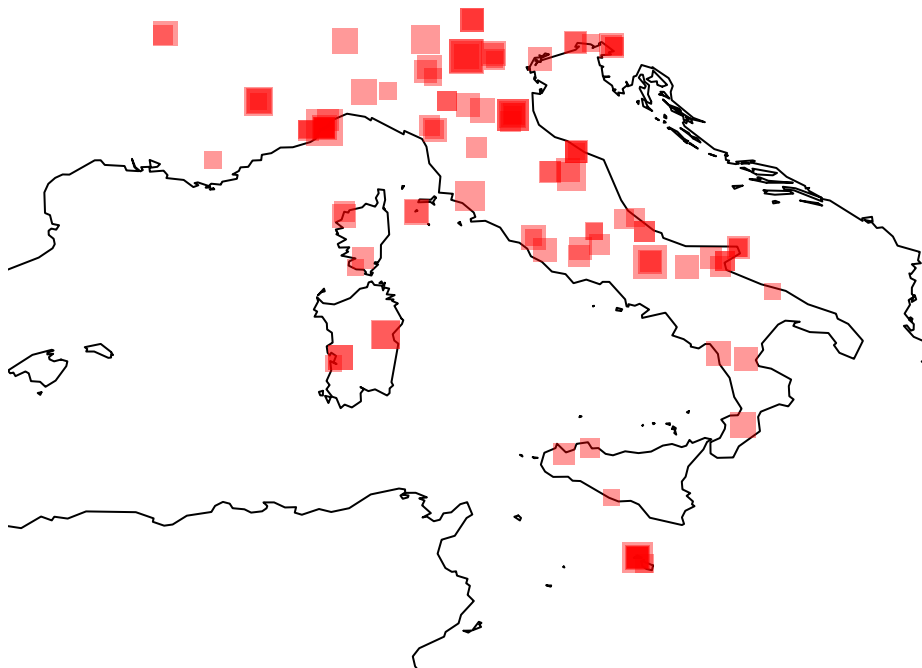



5205 cal. BC

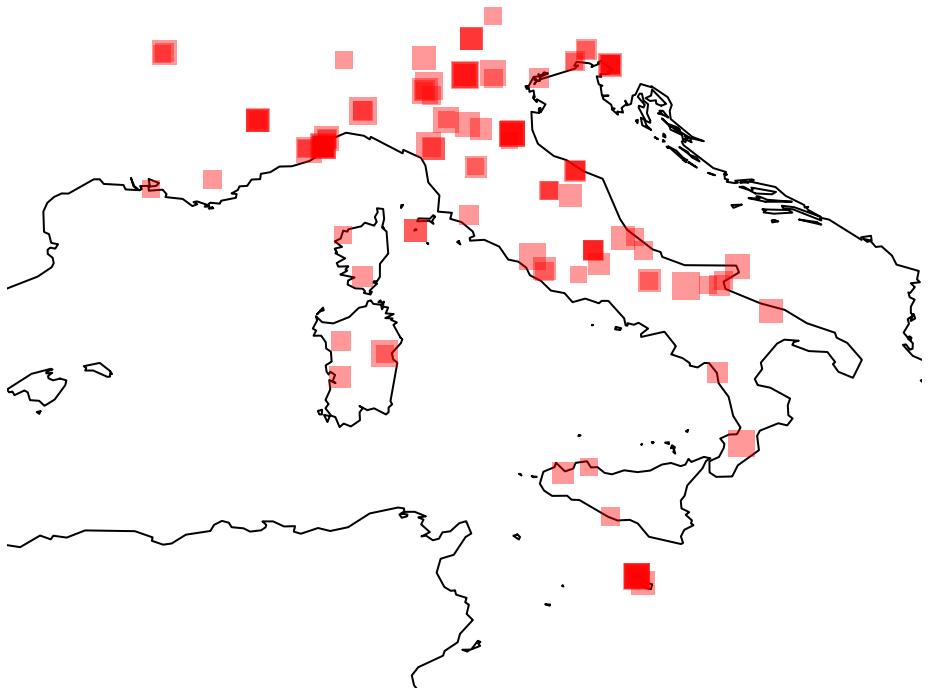

5200 cal. BC

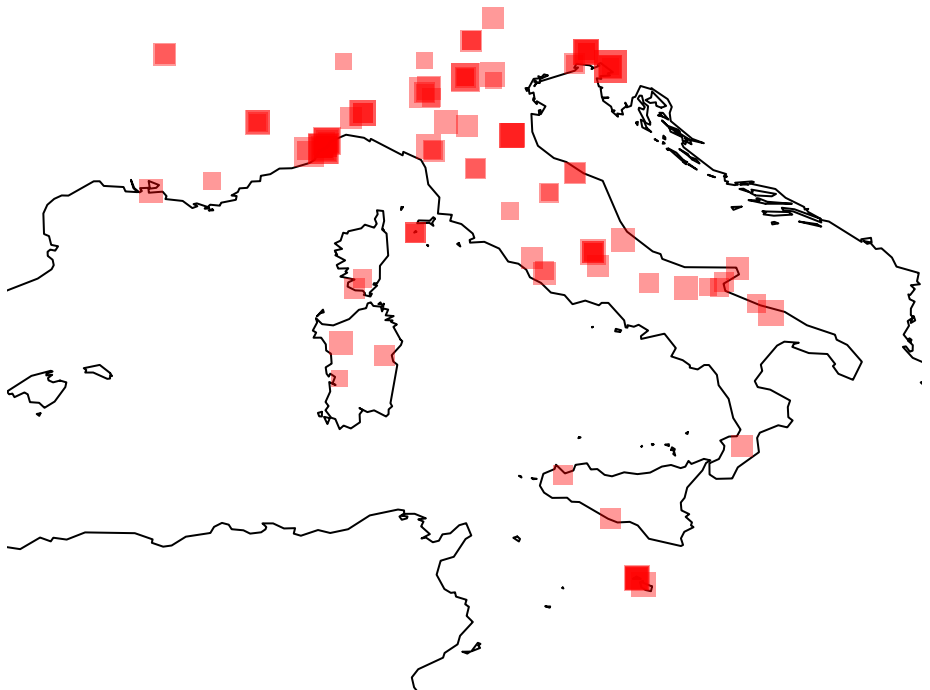

5195 cal. BC

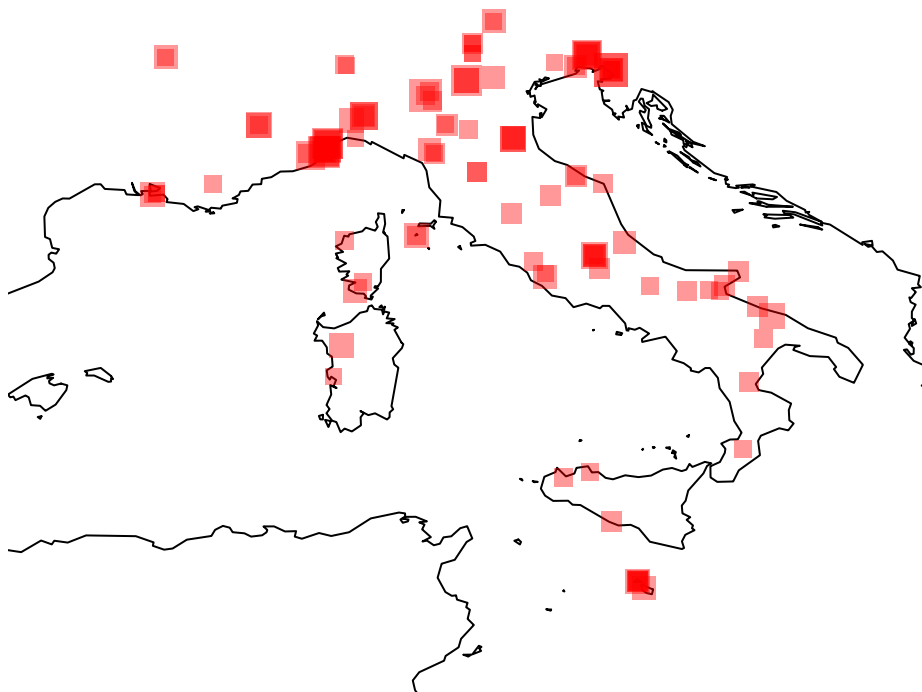

5190 cal. BC

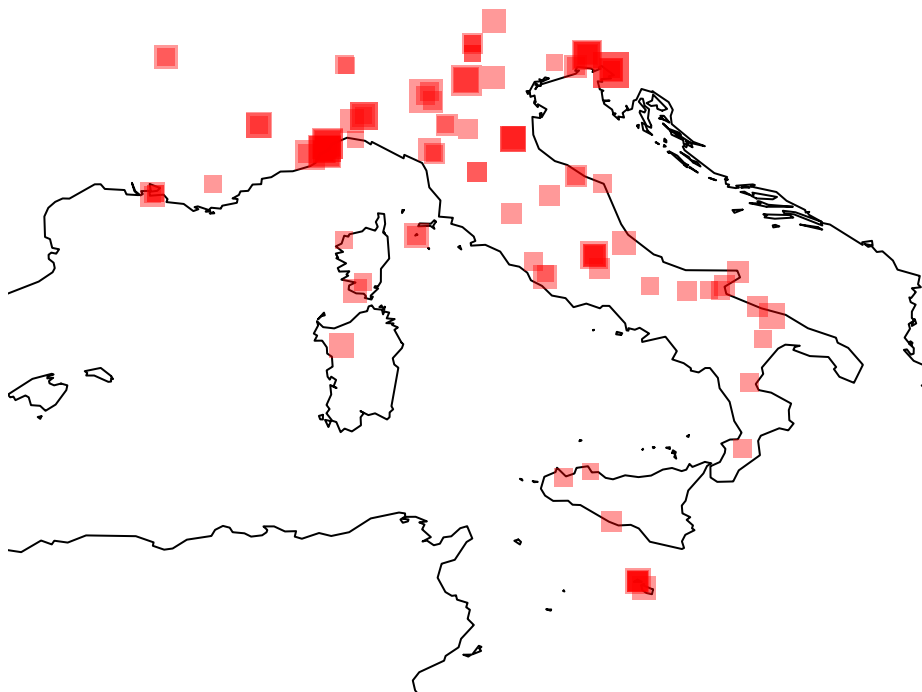



5180 cal. BC

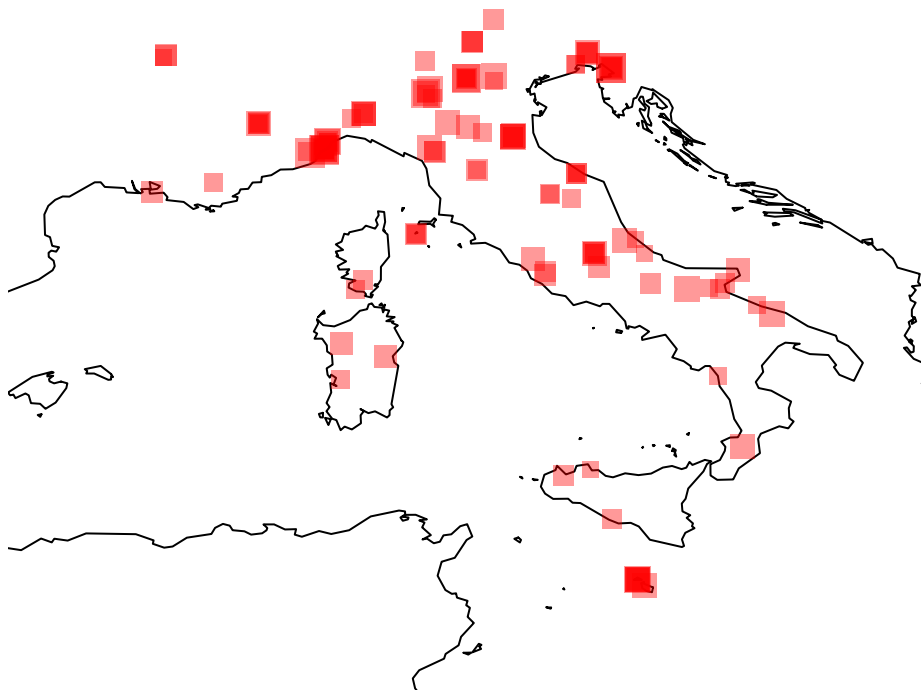

5175 cal. BC

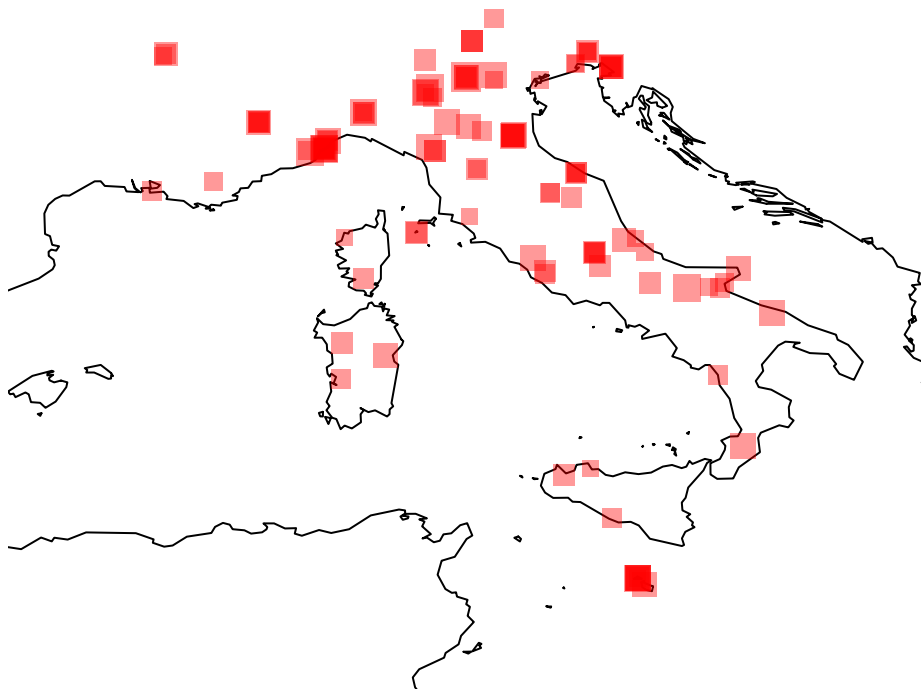

5170 cal. BC

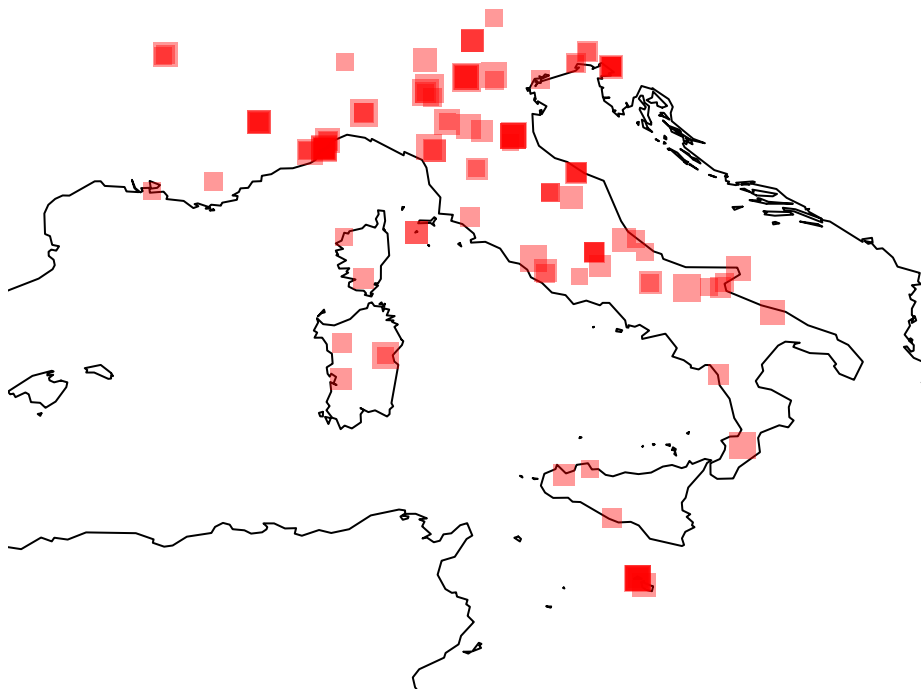



5165 cal. BC

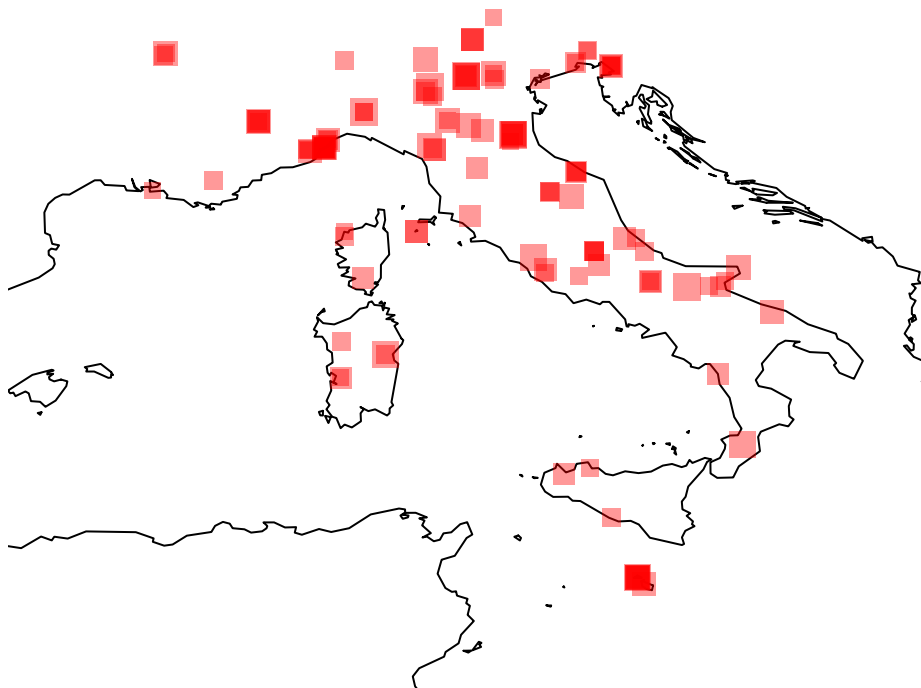

5160 cal. BC

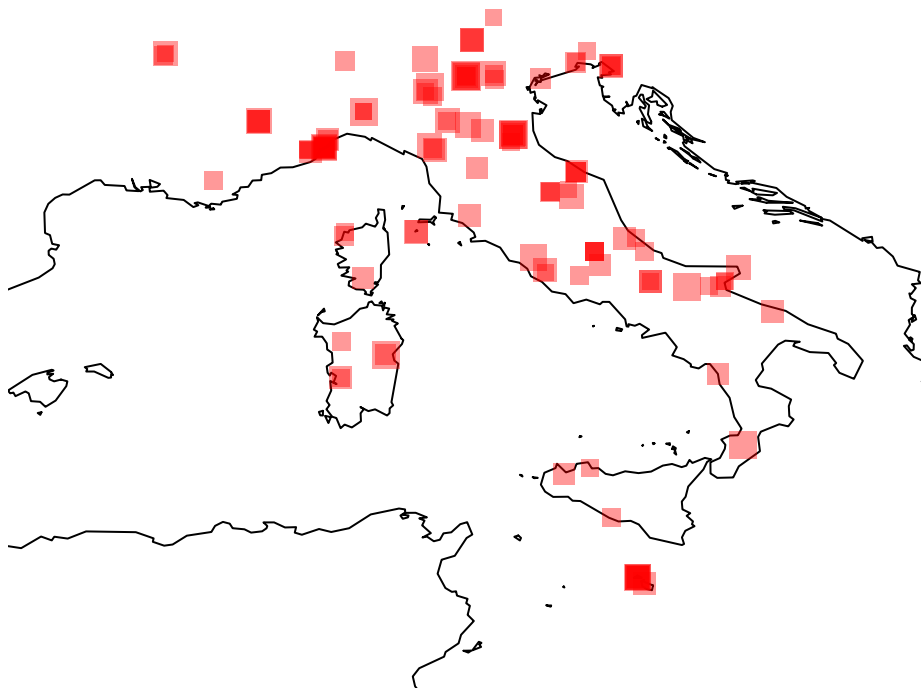

5155 cal. BC

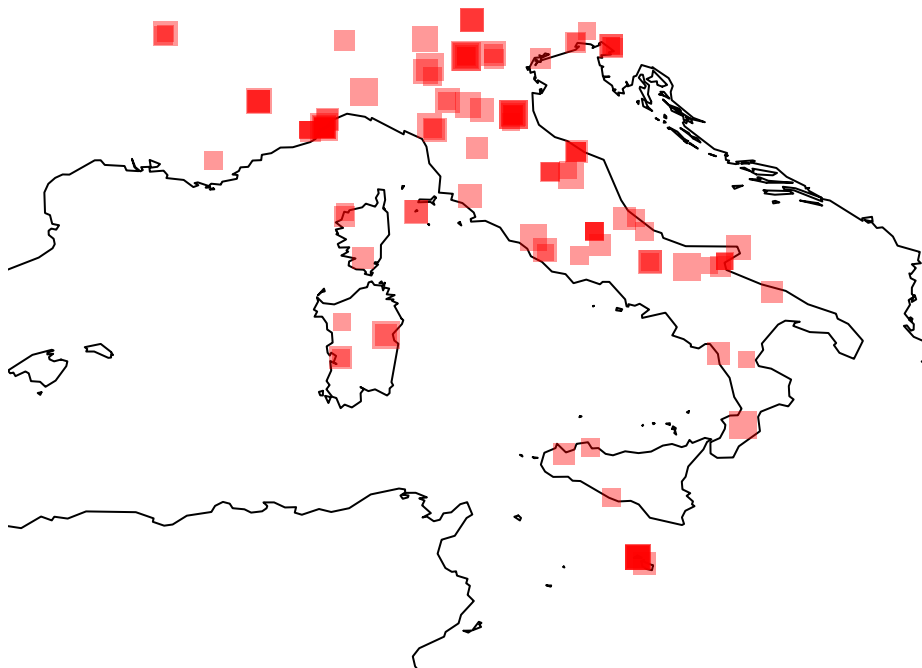

5150 cal. BC

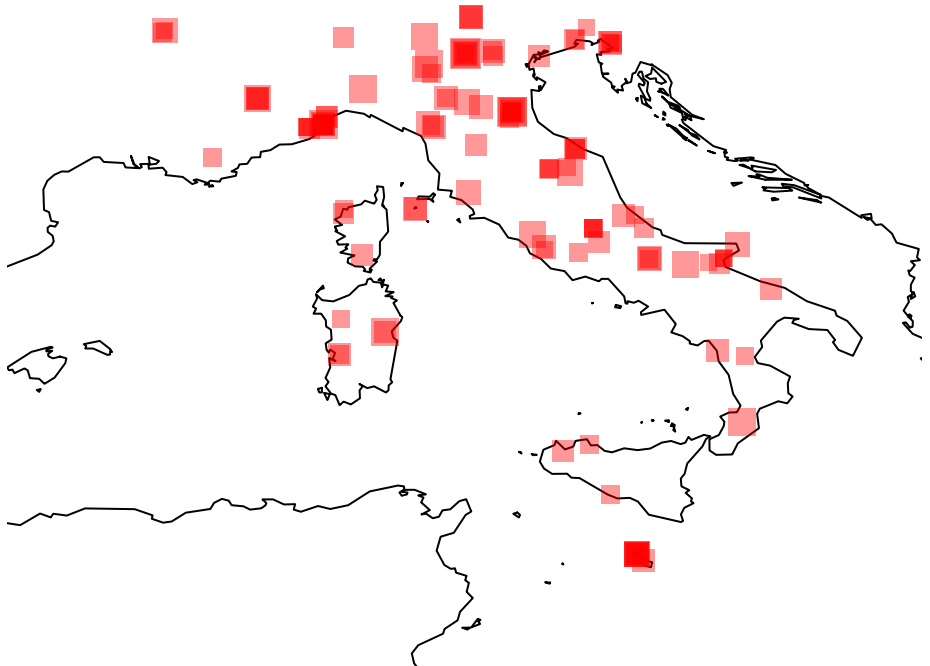

5145 cal. BC

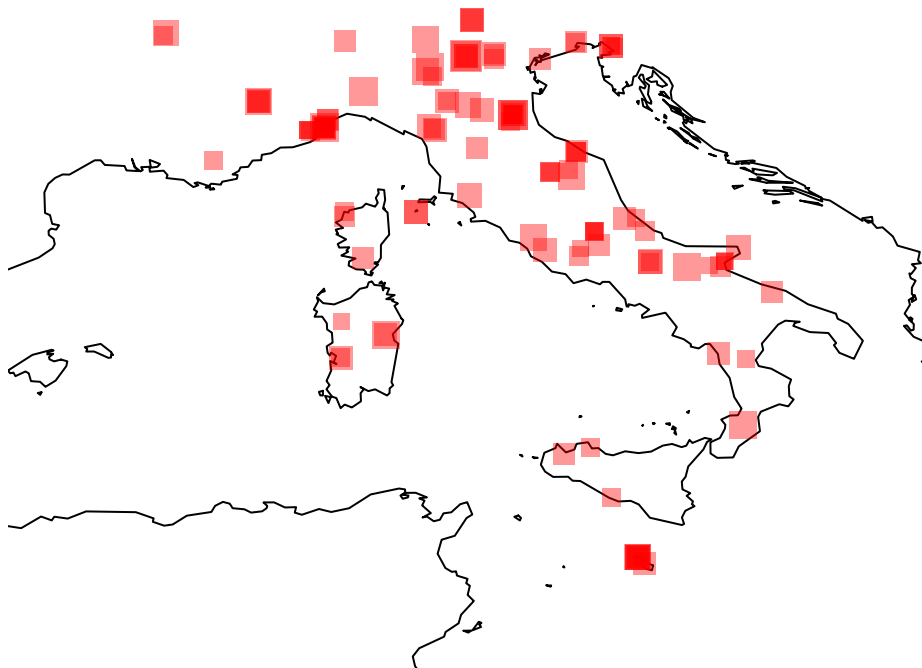

5140 cal. BC

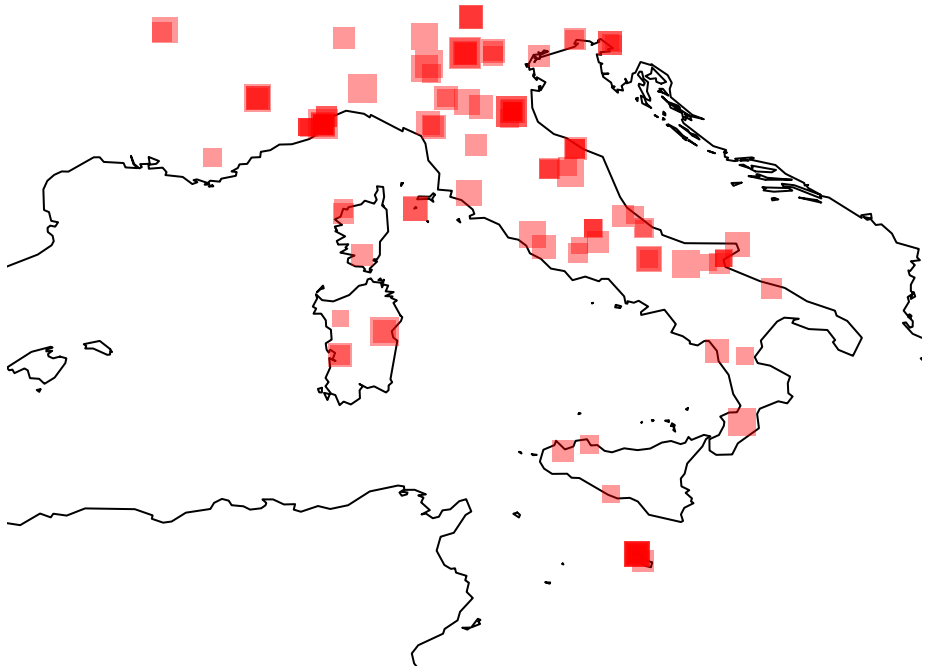

5135 cal. BC

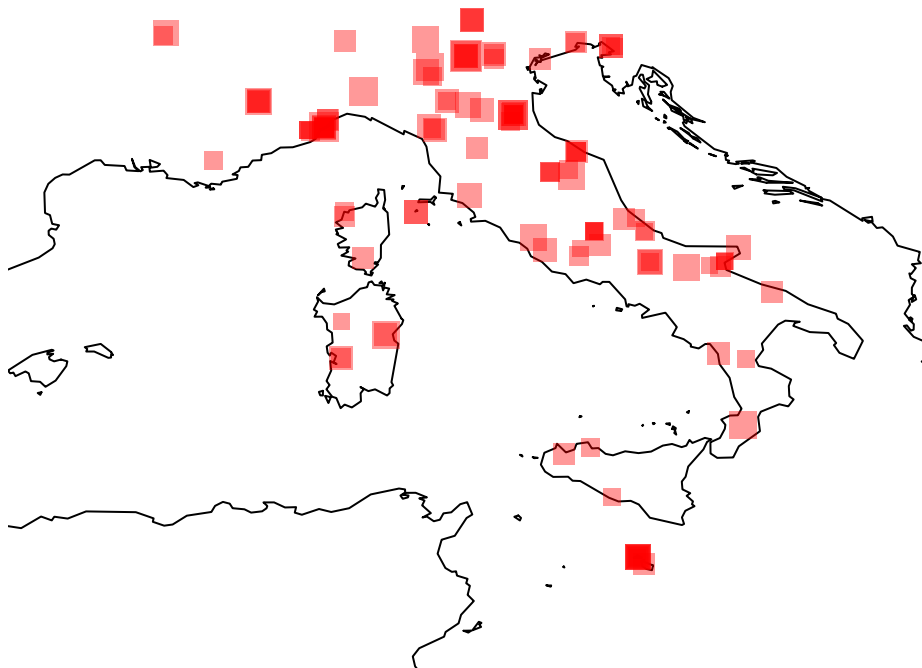

5130 cal. BC





5125 cal. BC

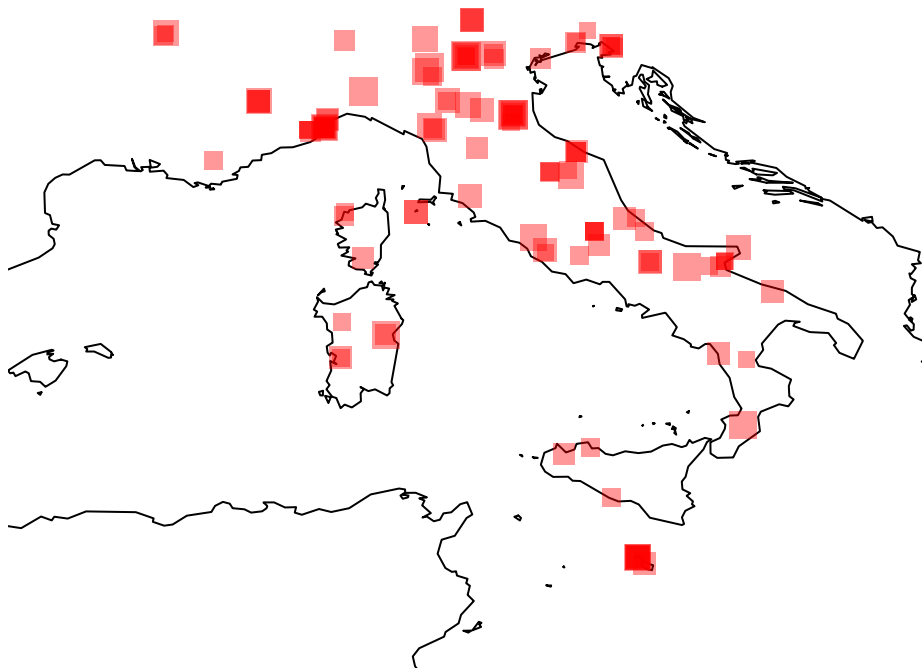

5120 cal. BC

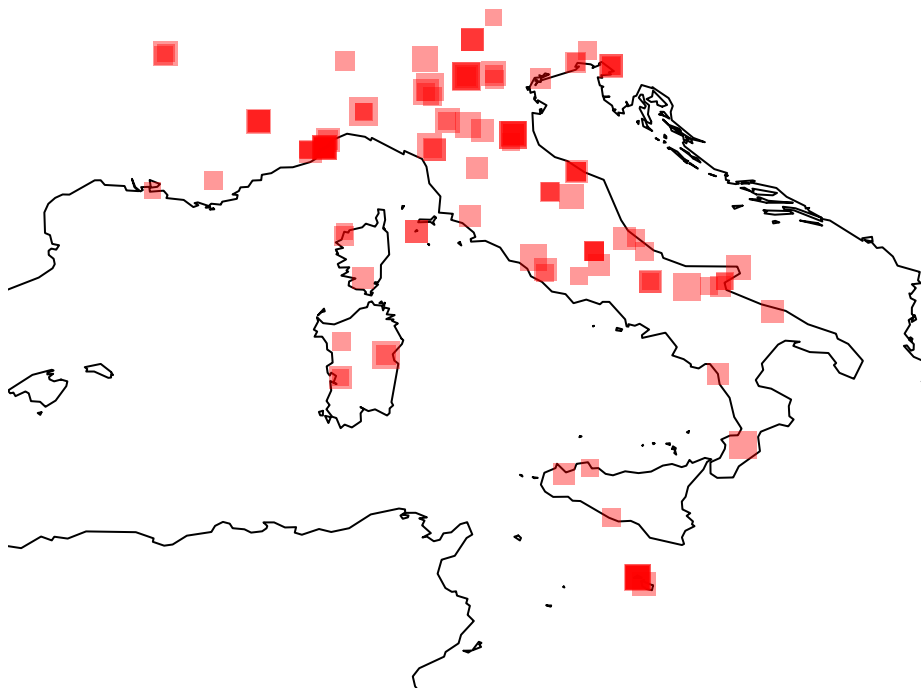

5115 cal. BC

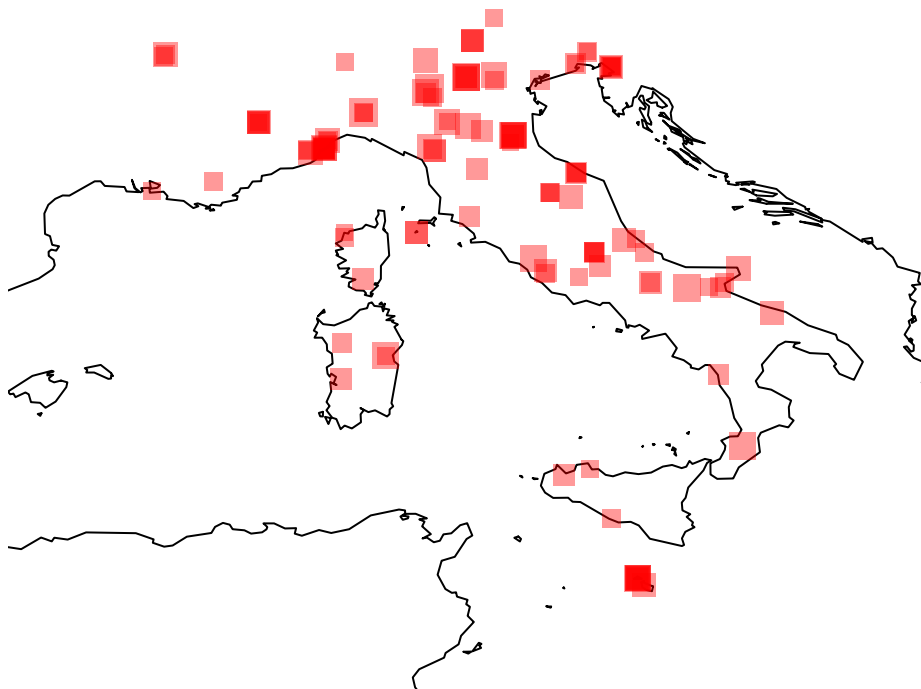

5110 cal. BC

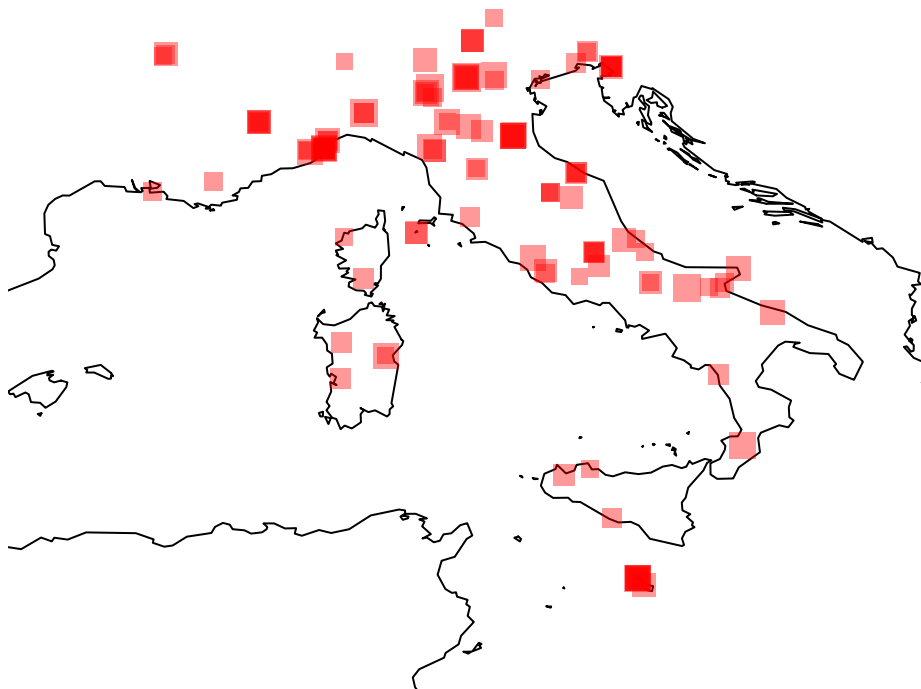

5105 cal. BC

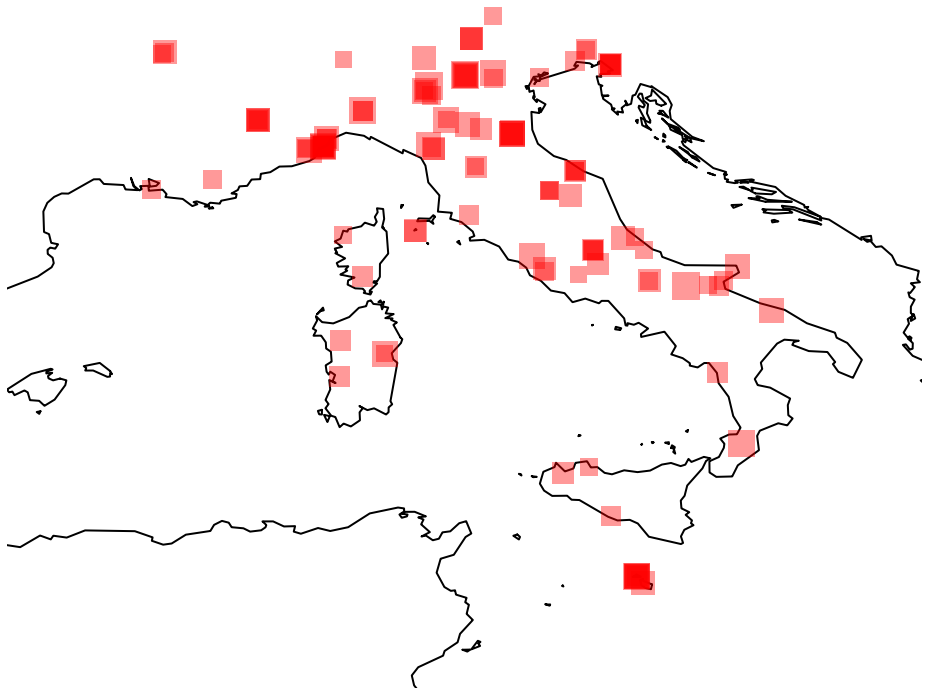

5100 cal. BC

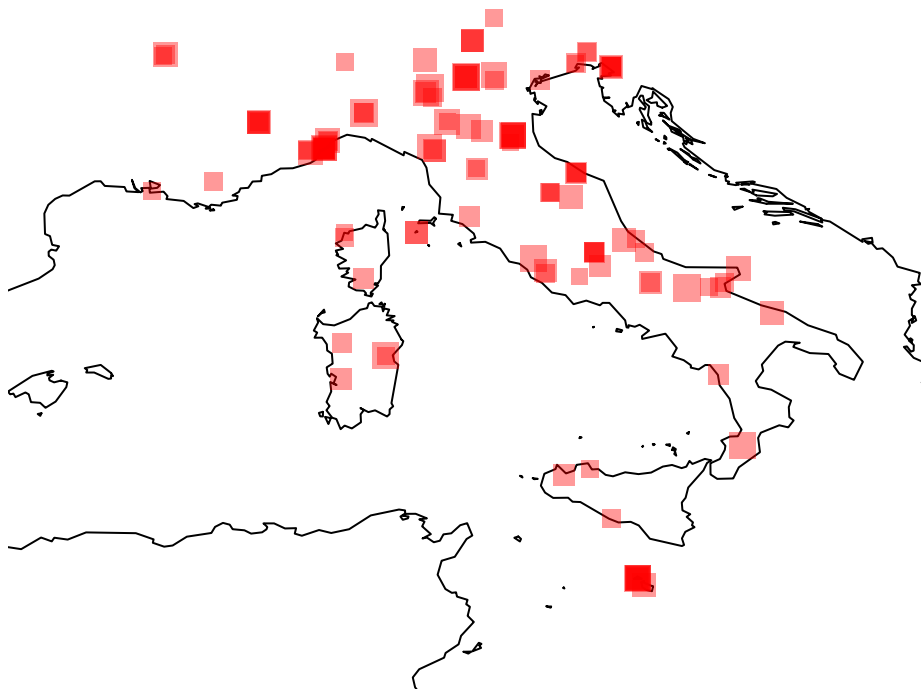

5095 cal. BC

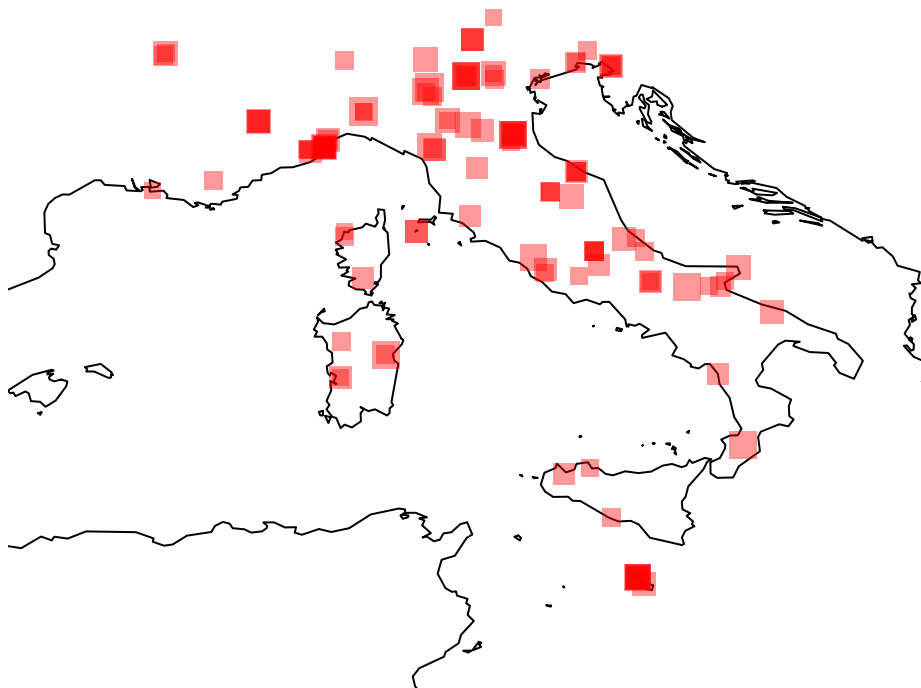

5090 cal. BC

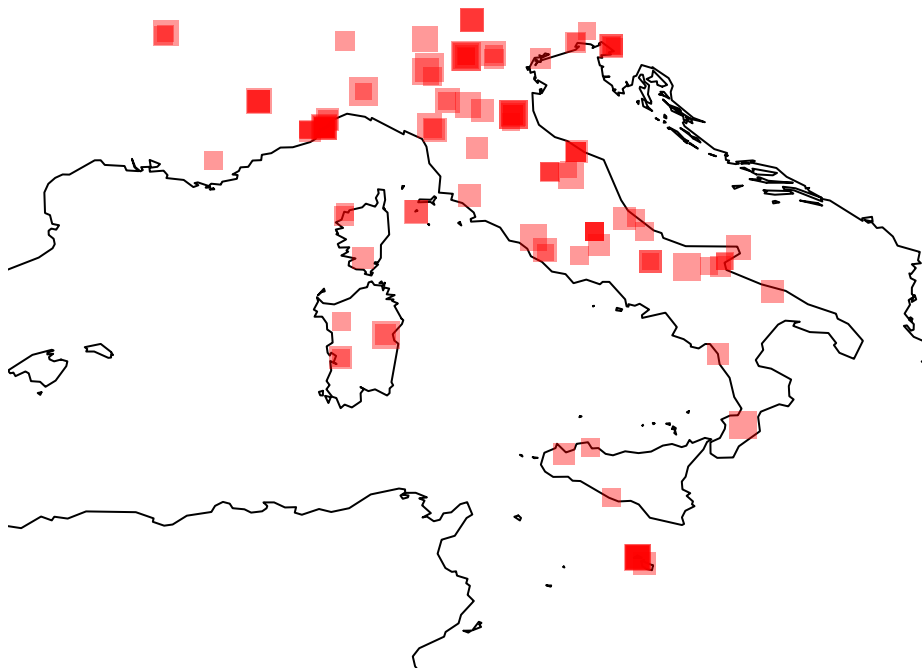



5085 cal. BC



5080 cal. BC

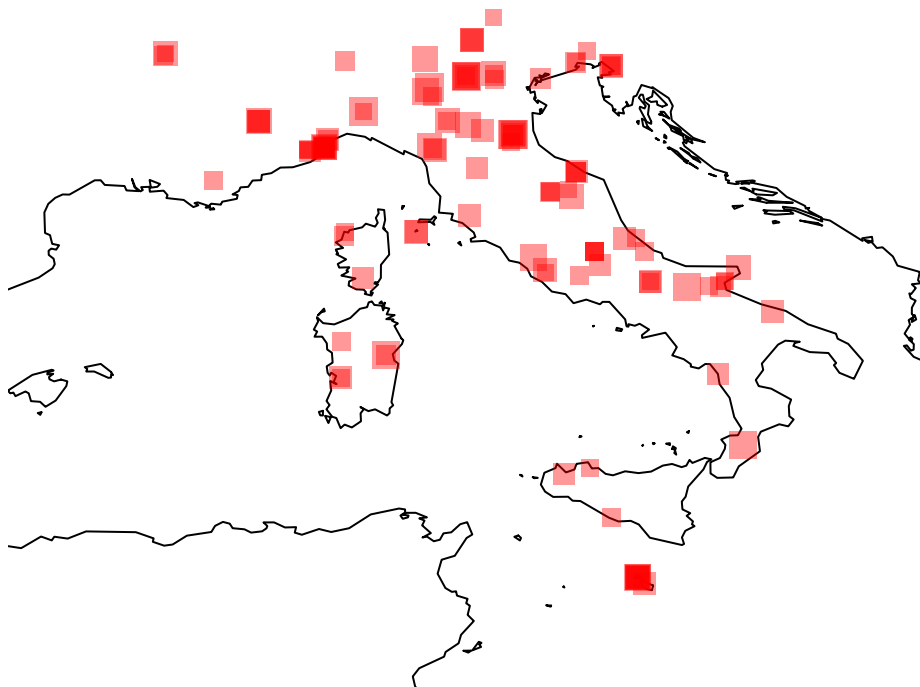

5075 cal. BC

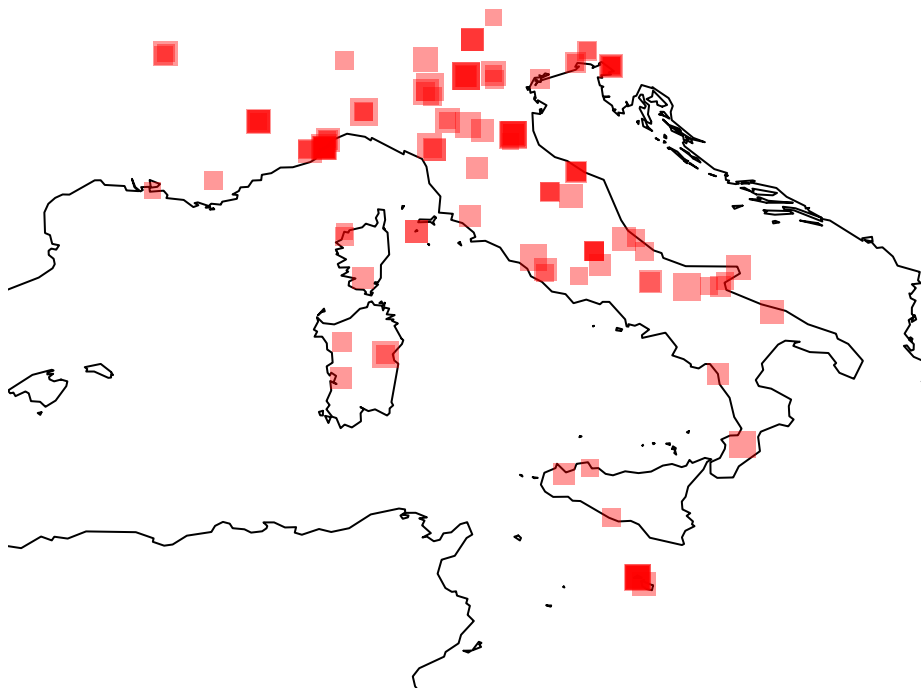

5070 cal. BC

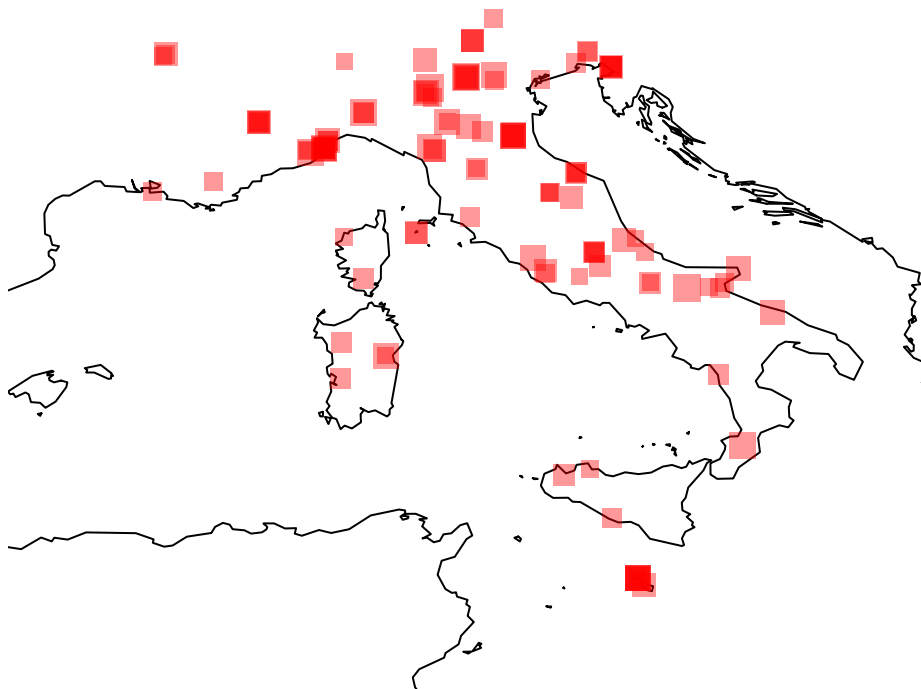

5065 cal. BC

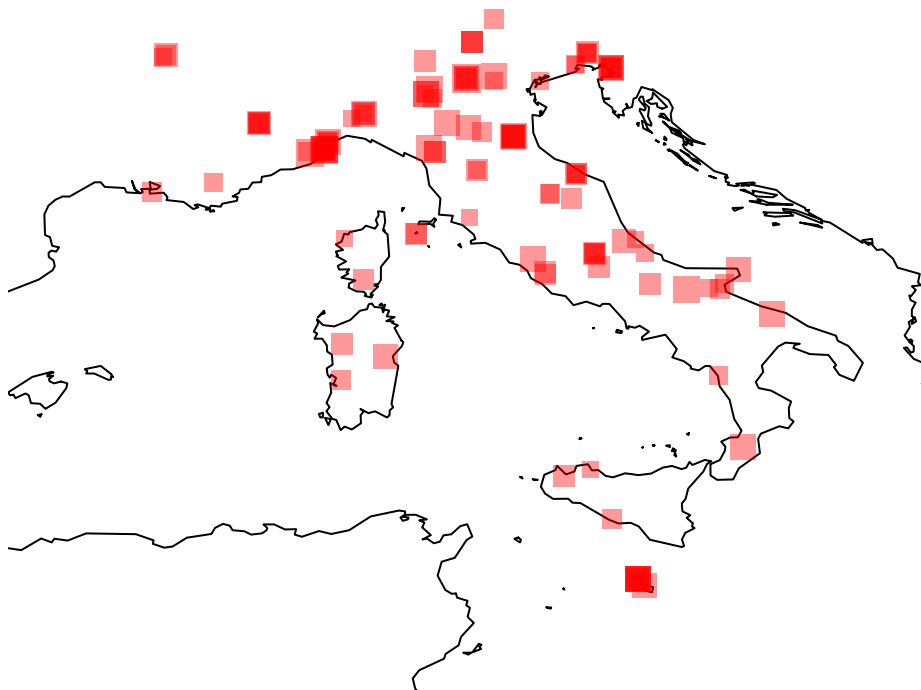

5060 cal. BC

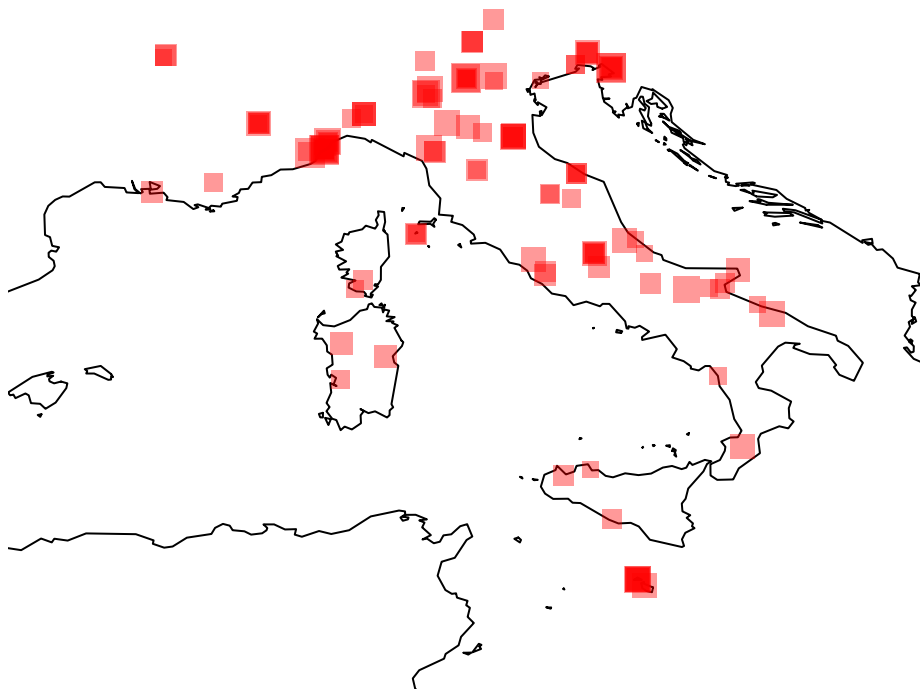

5055 cal. BC

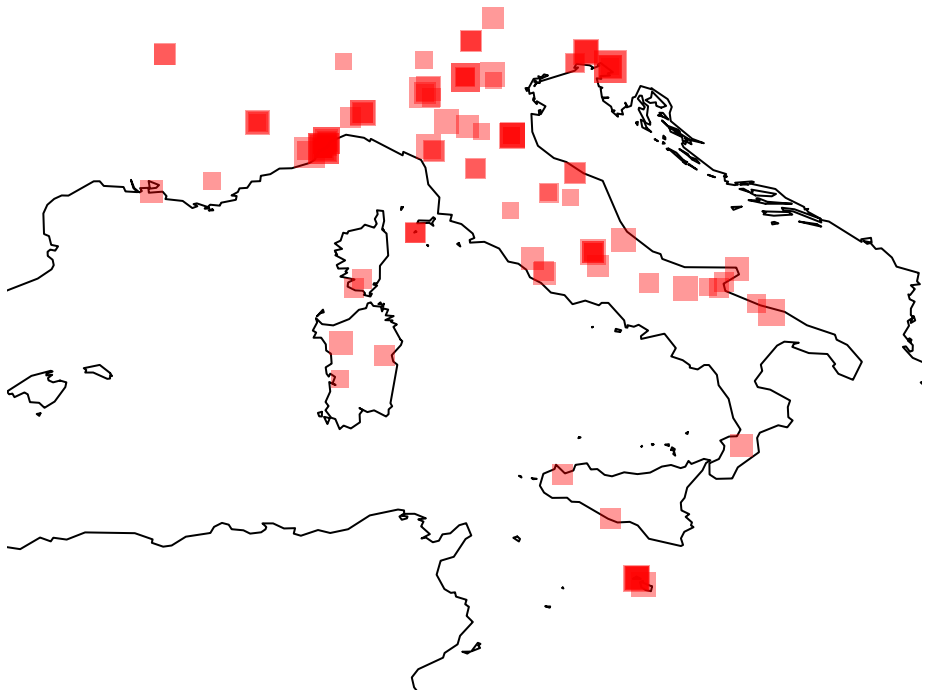

5050 cal. BC

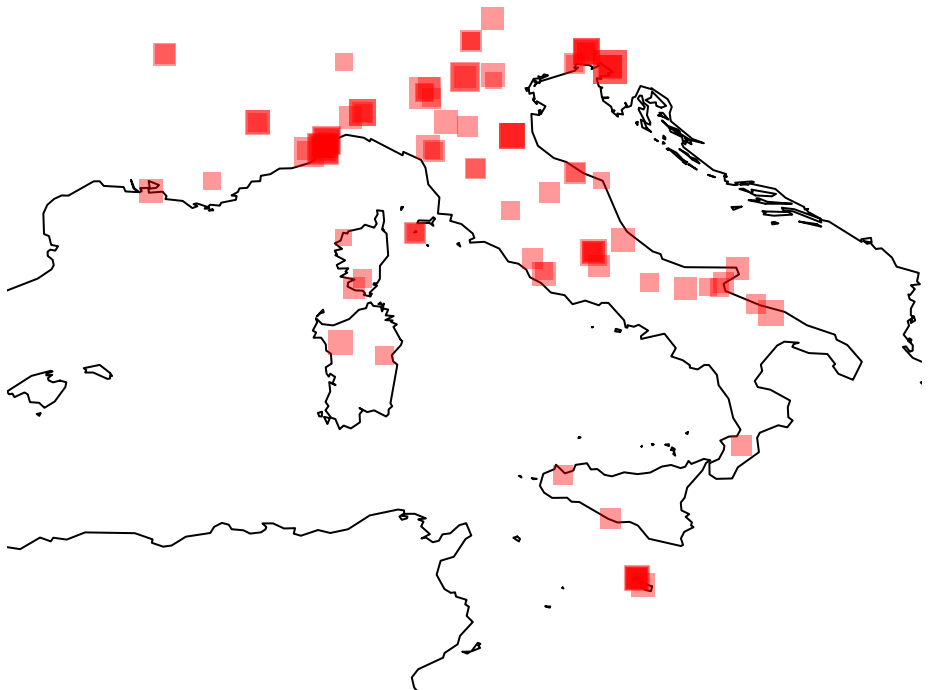





5040 cal. BC

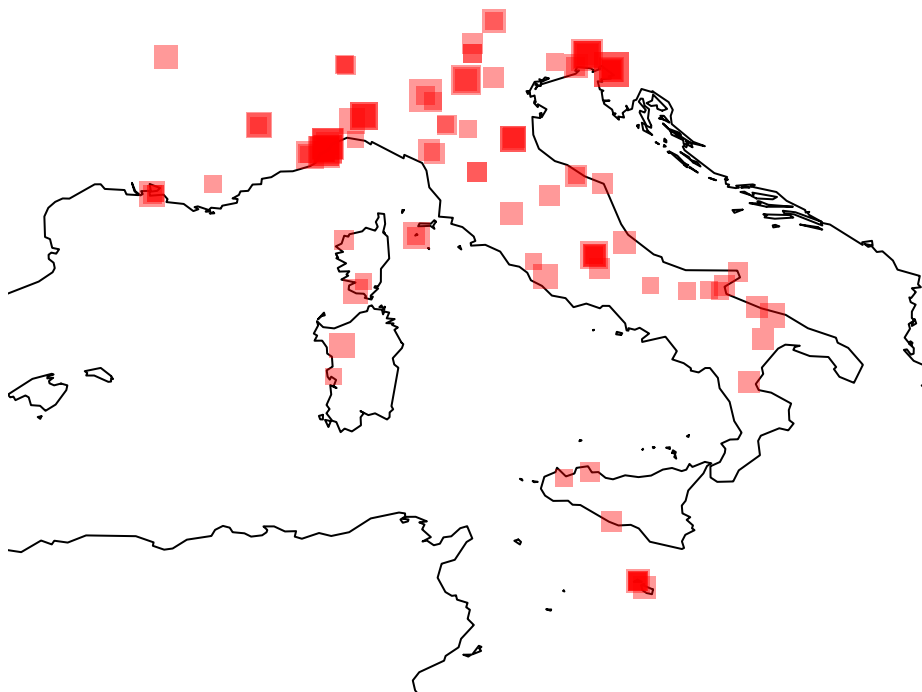

5035 cal. BC

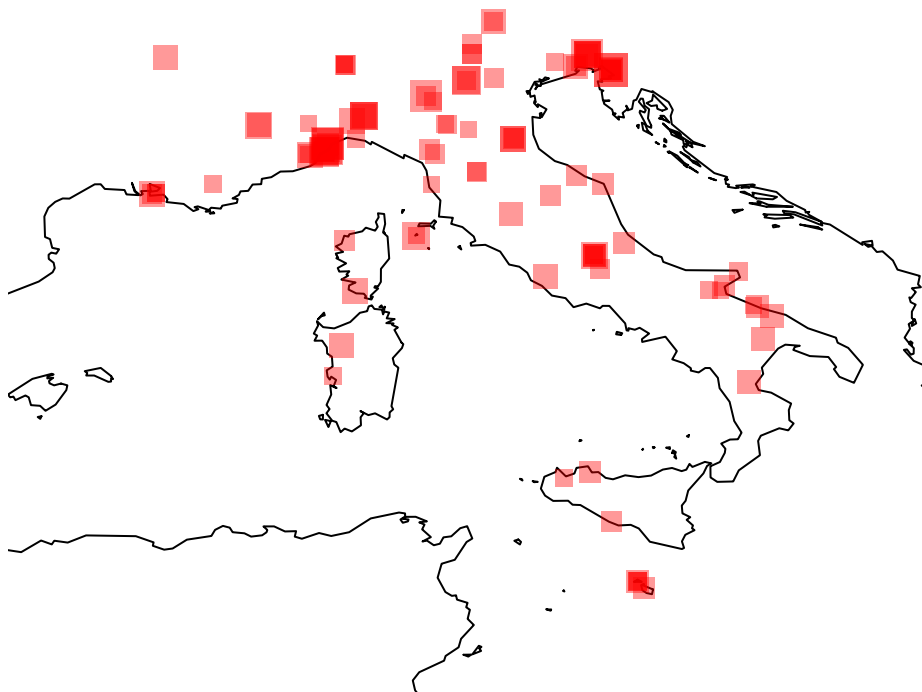

5030 cal. BC

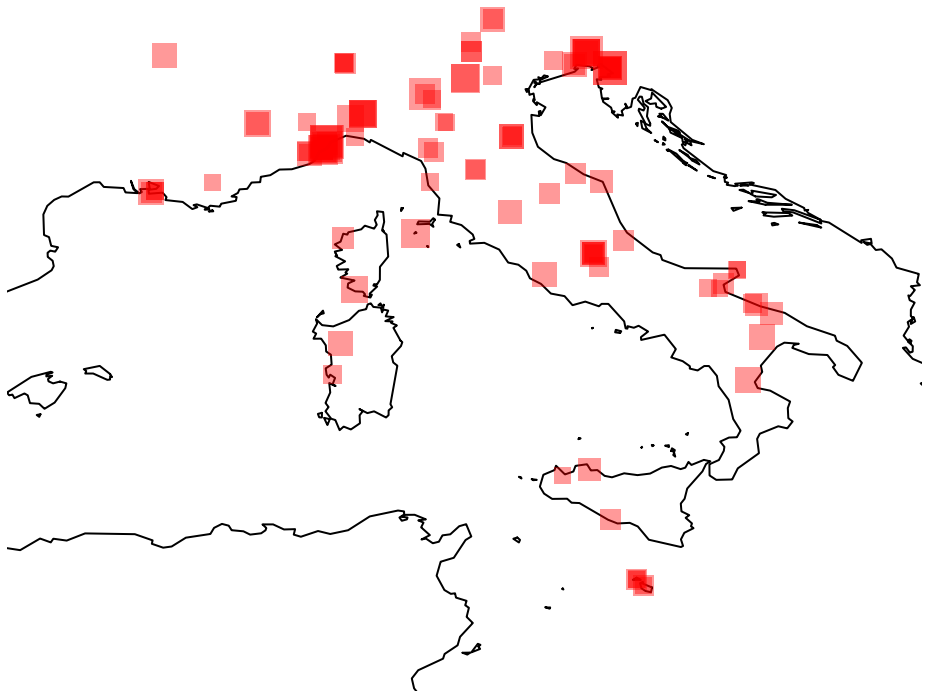

5025 cal. BC

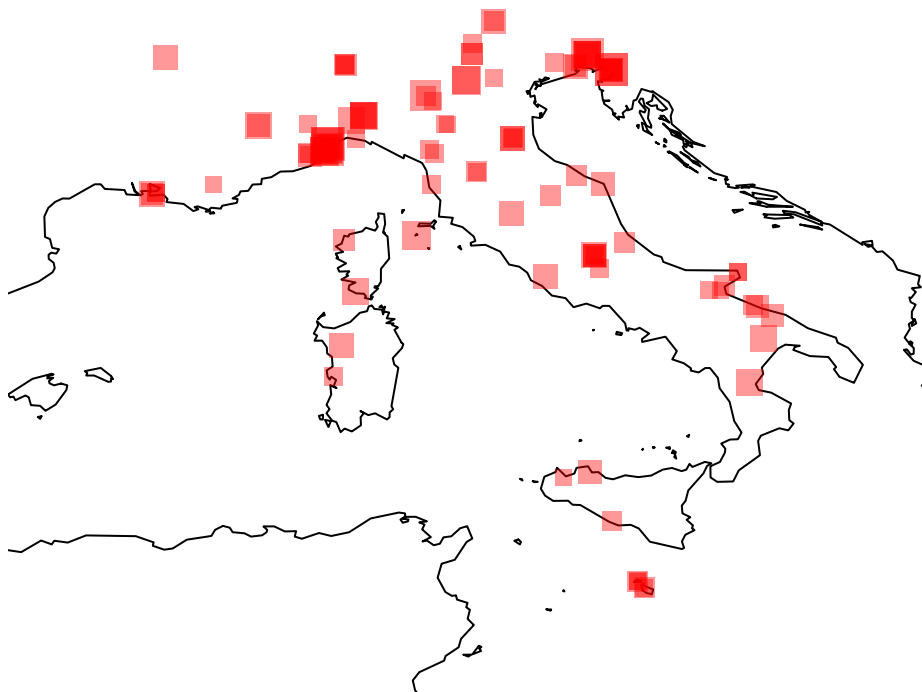

5020 cal. BC

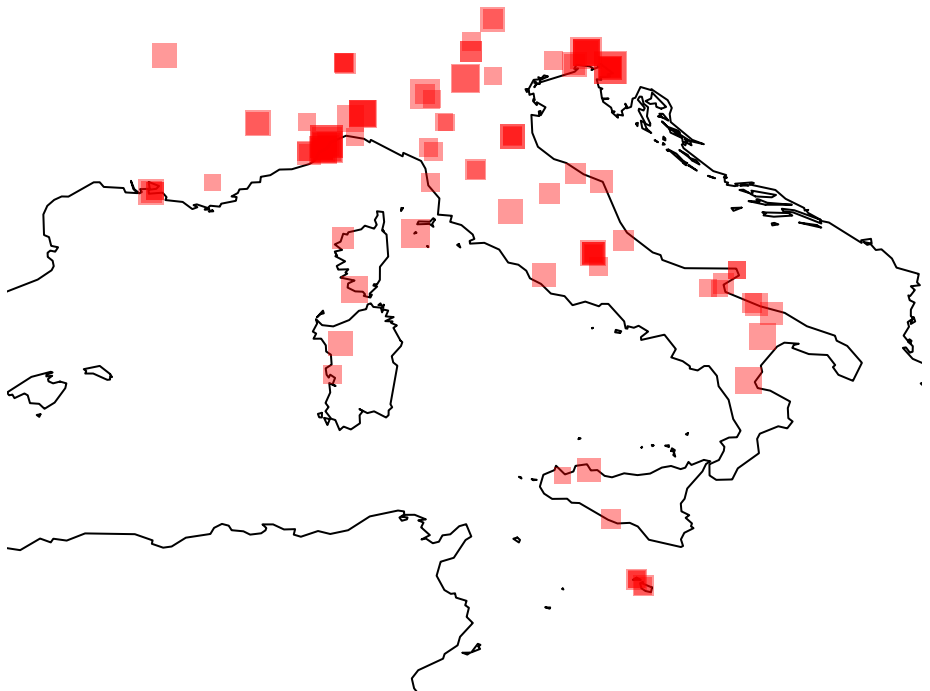

5015 cal. BC

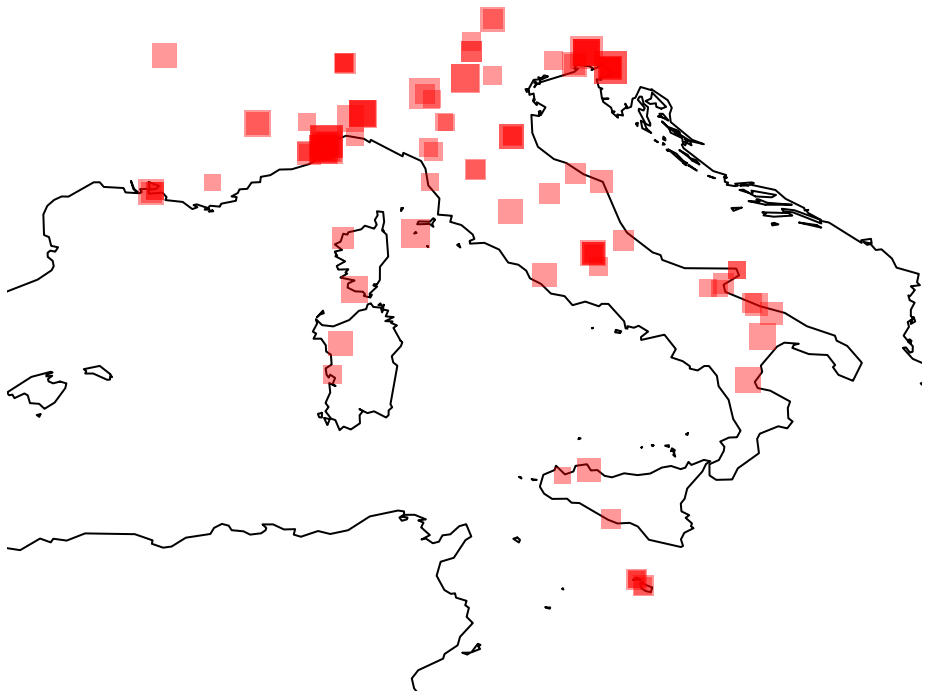

5010 cal. BC

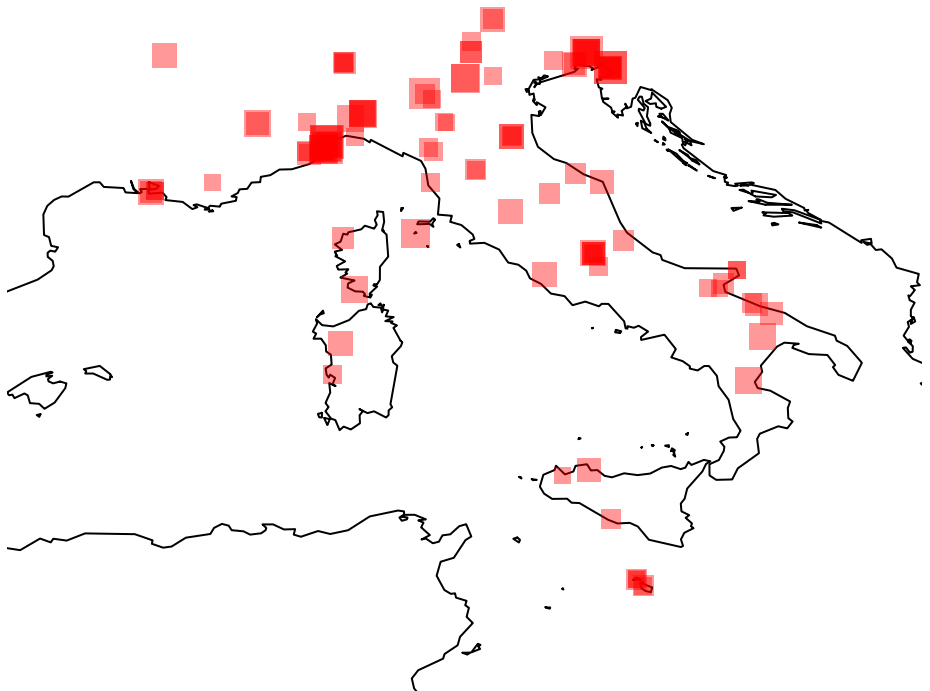



5005 cal. BC

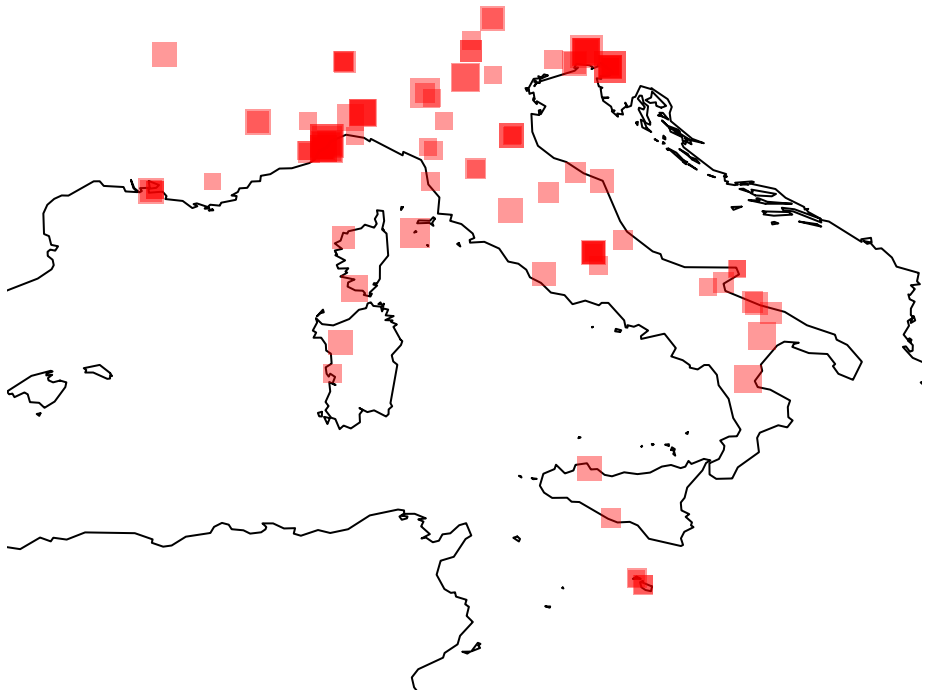

5000 cal. BC

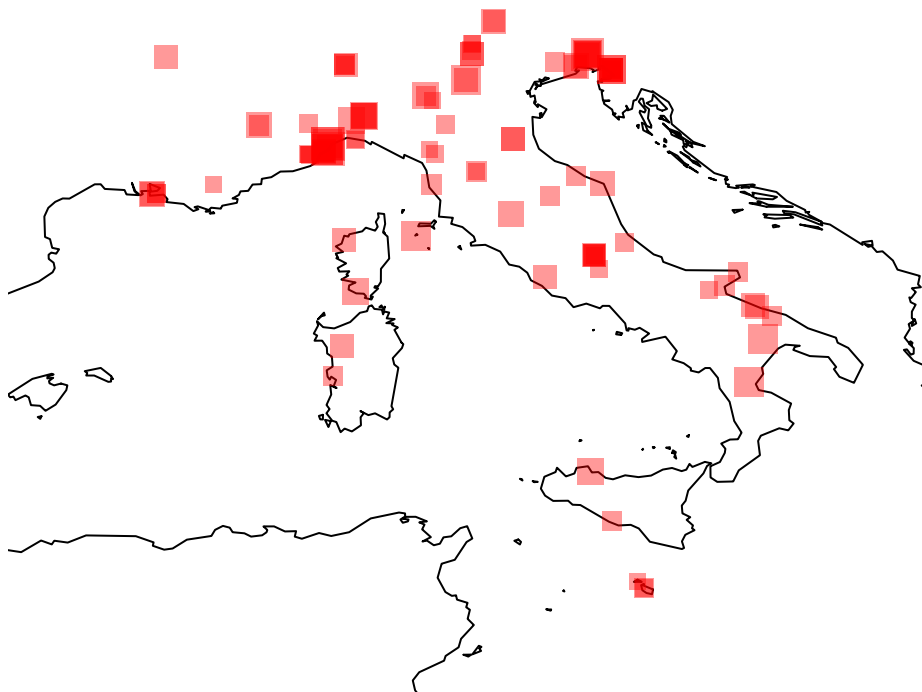

4995 cal. BC

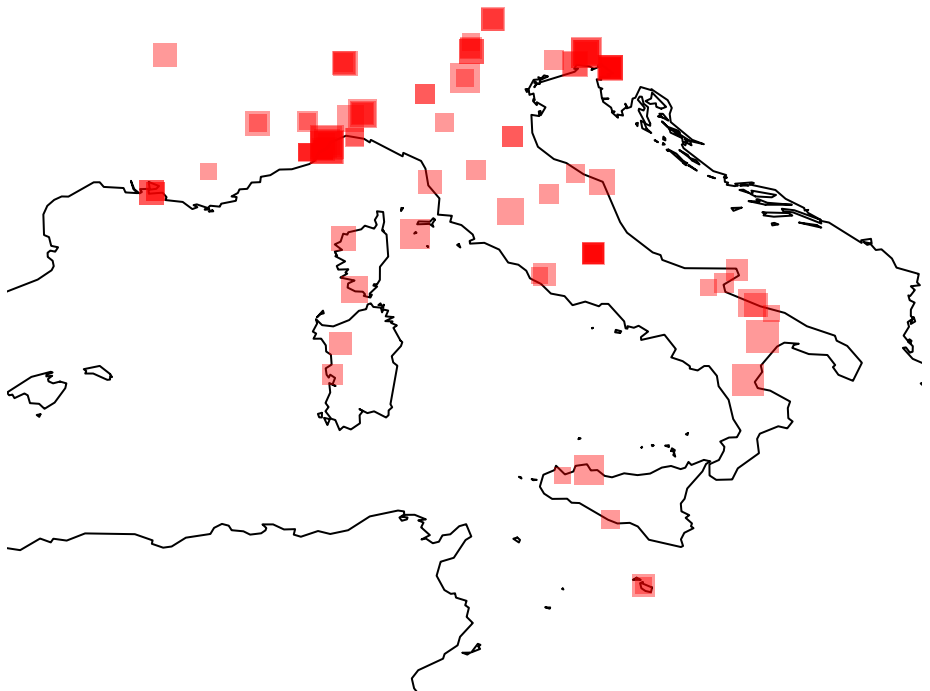

4990 cal. BC

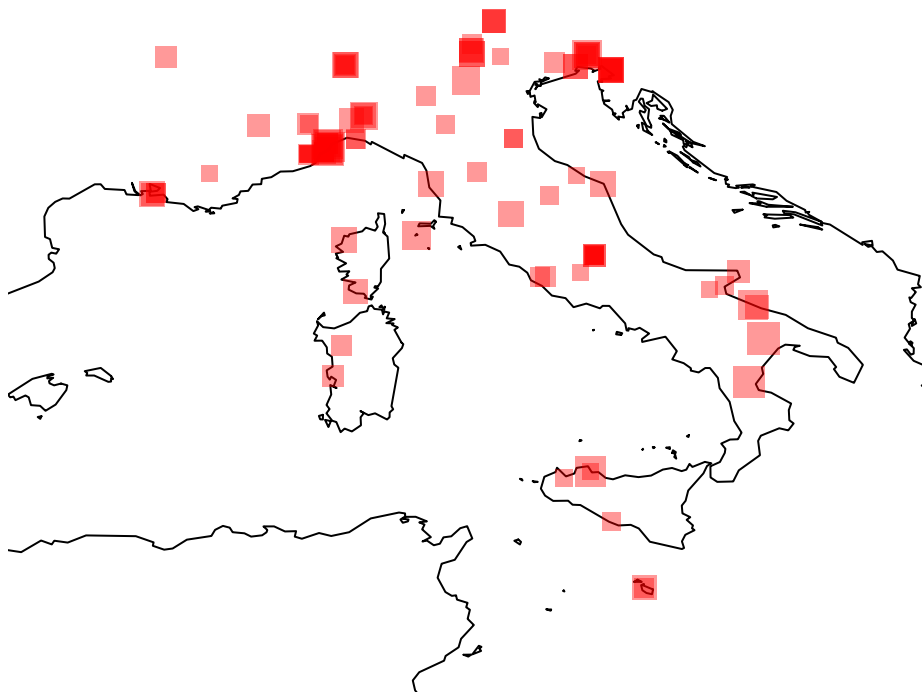

4985 cal. BC

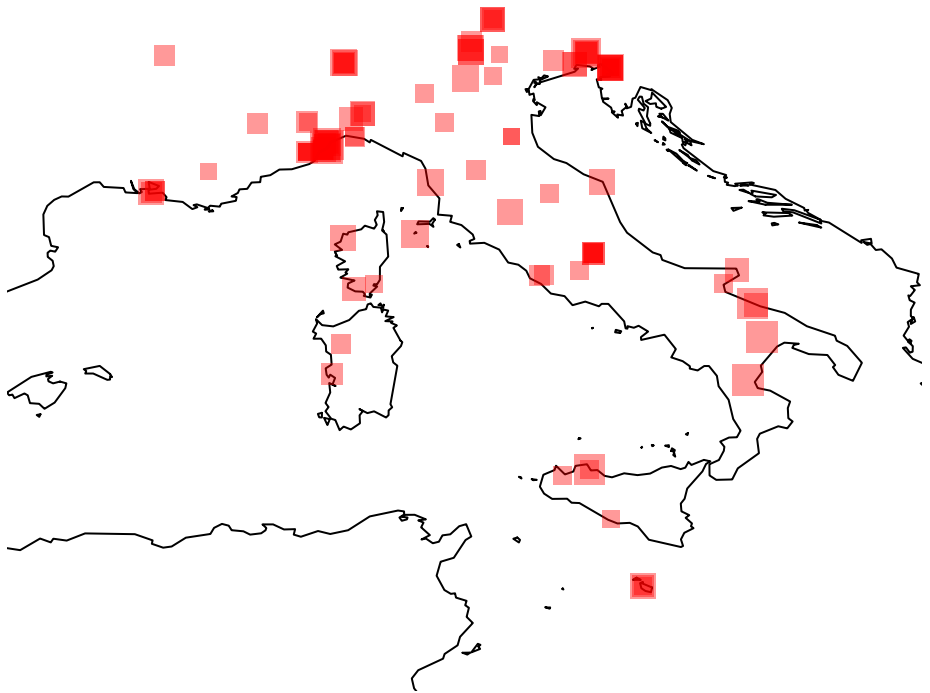

4980 cal. BC

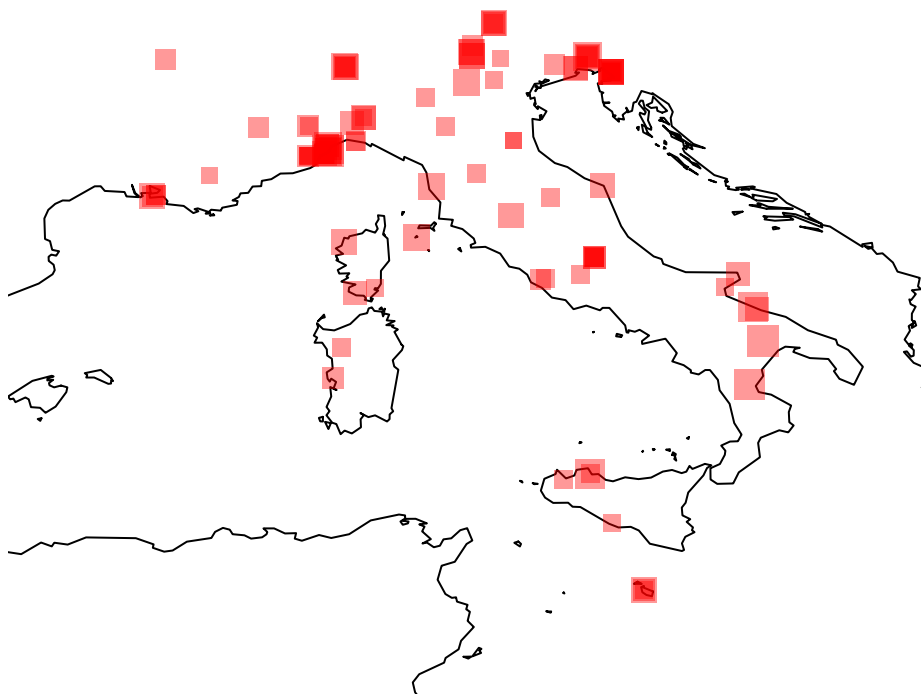

4975 cal. BC

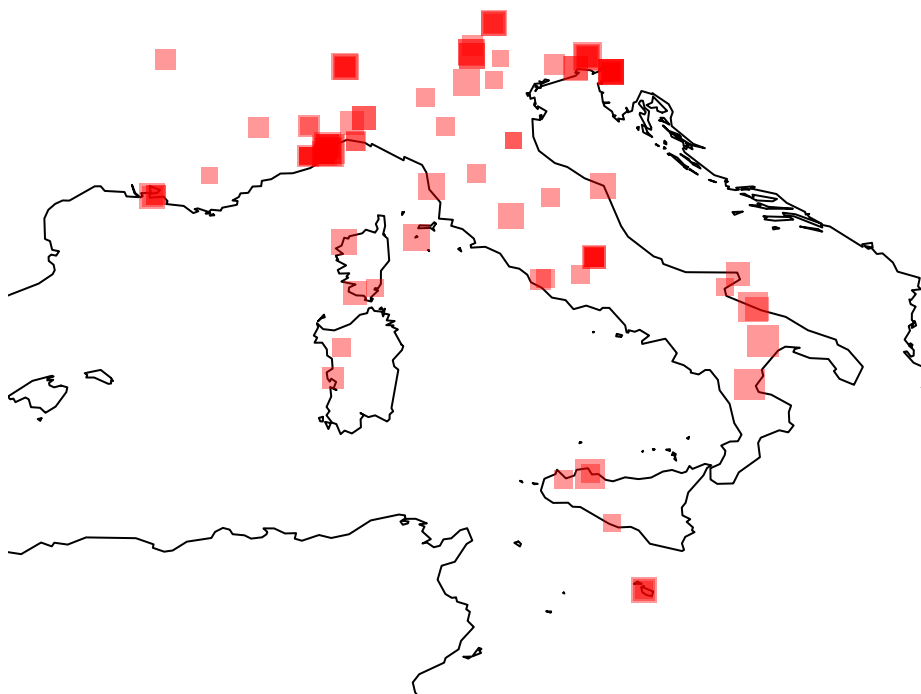

4970 cal. BC

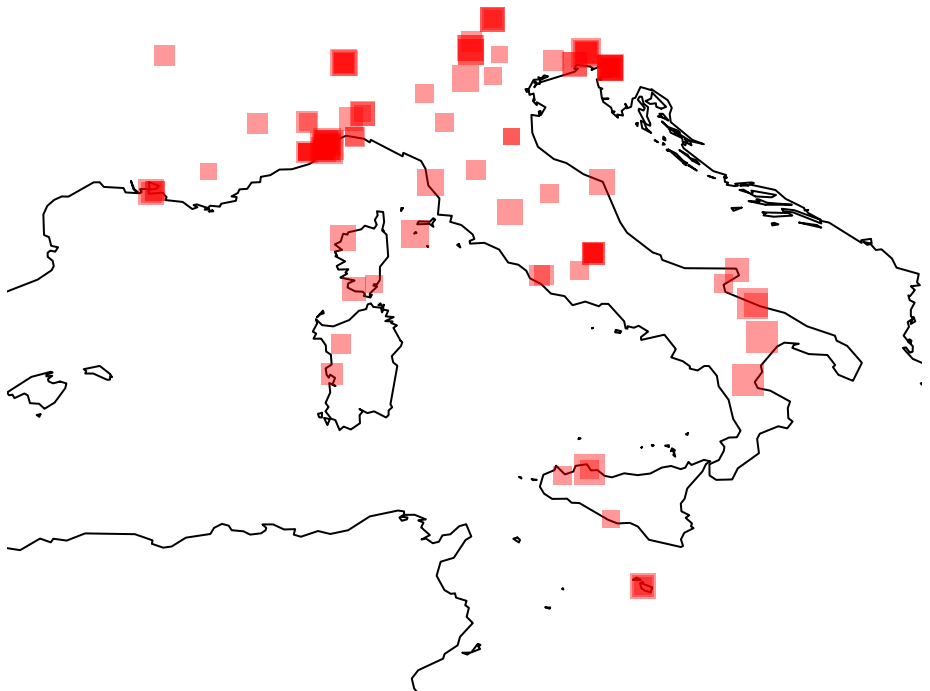



4965 cal. BC

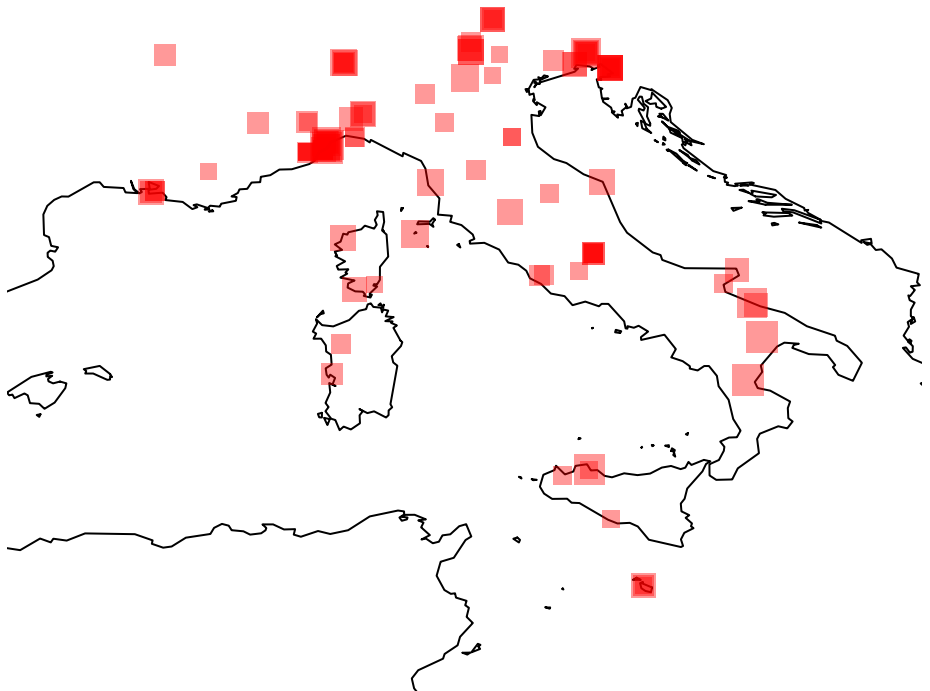

4960 cal. BC

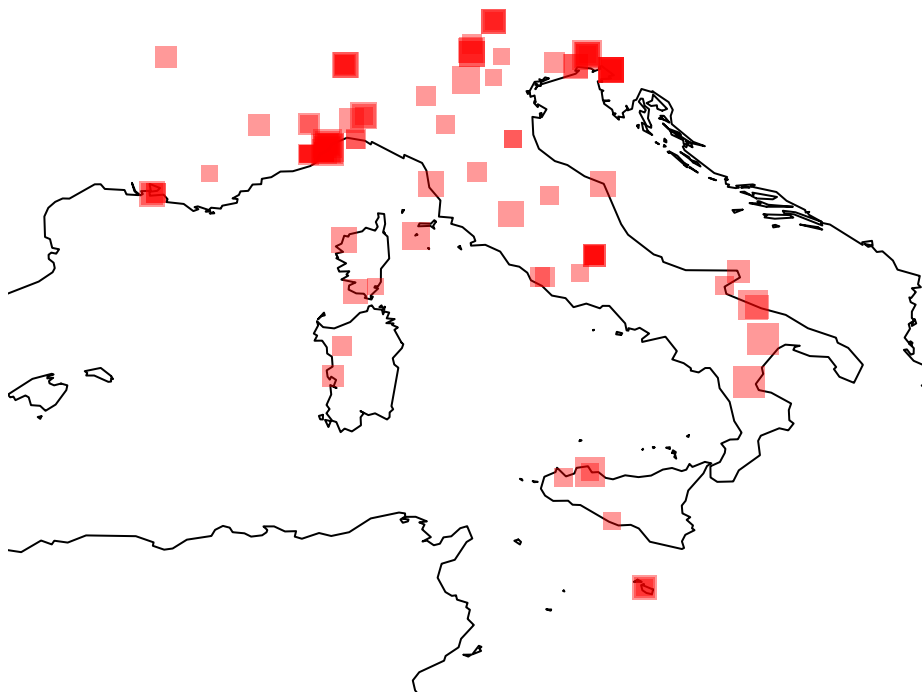

4955 cal. BC

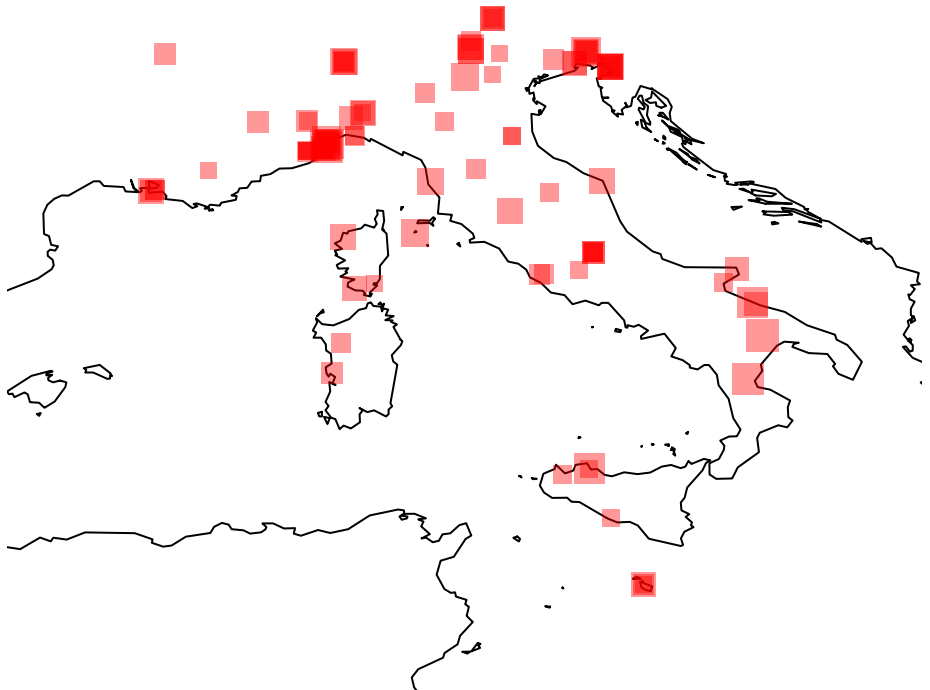

4950 cal. BC

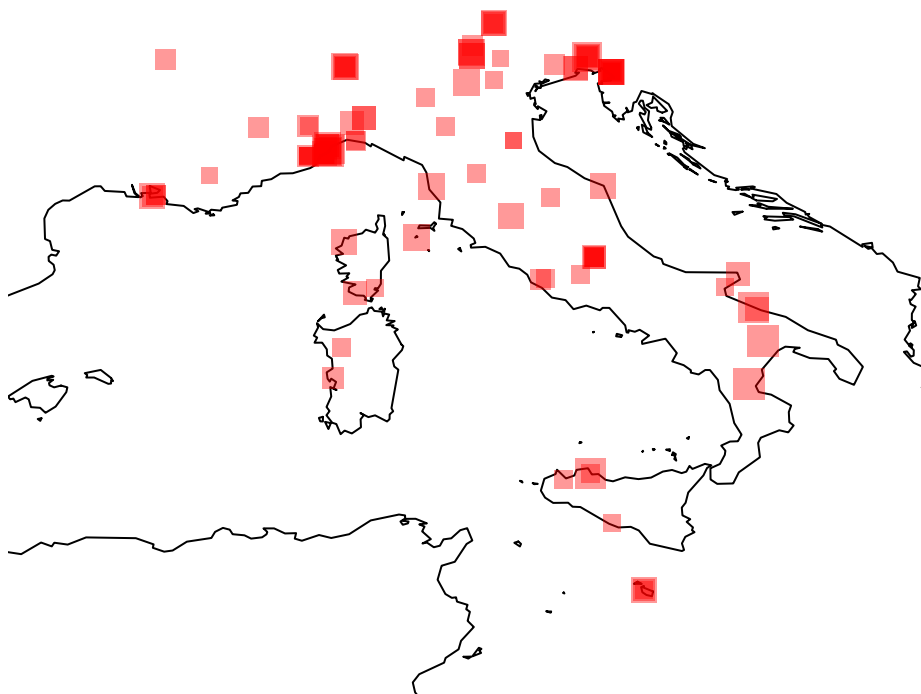

4945 cal. BC

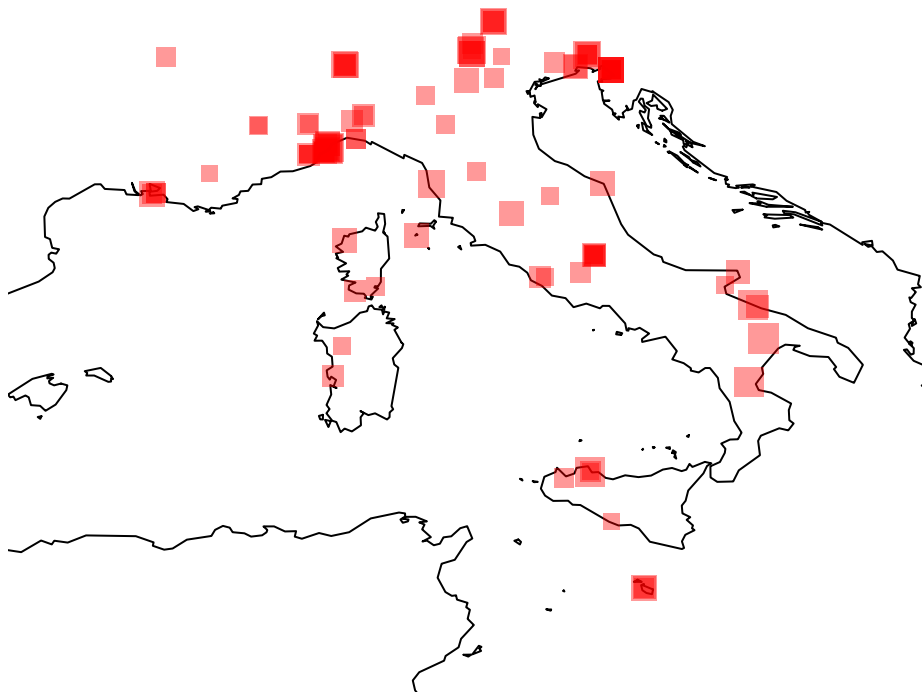

4940 cal. BC

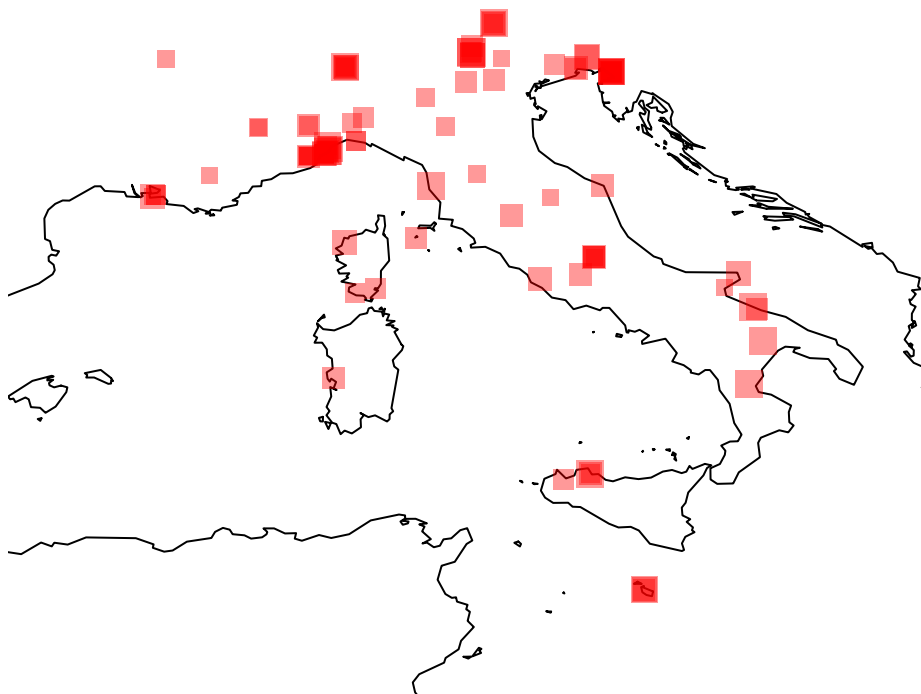

4935 cal. BC

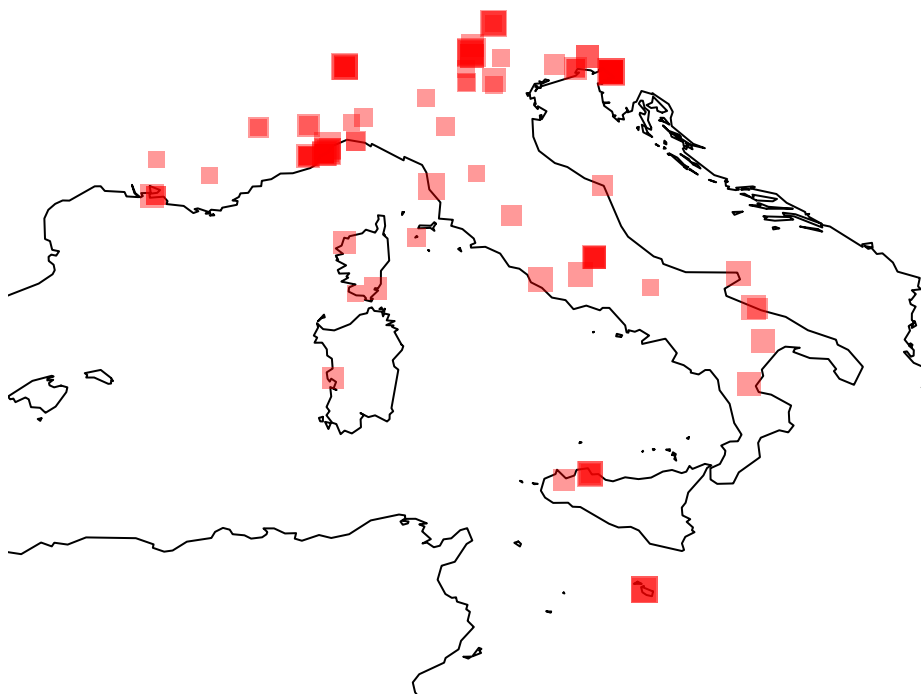

4930 cal. BC

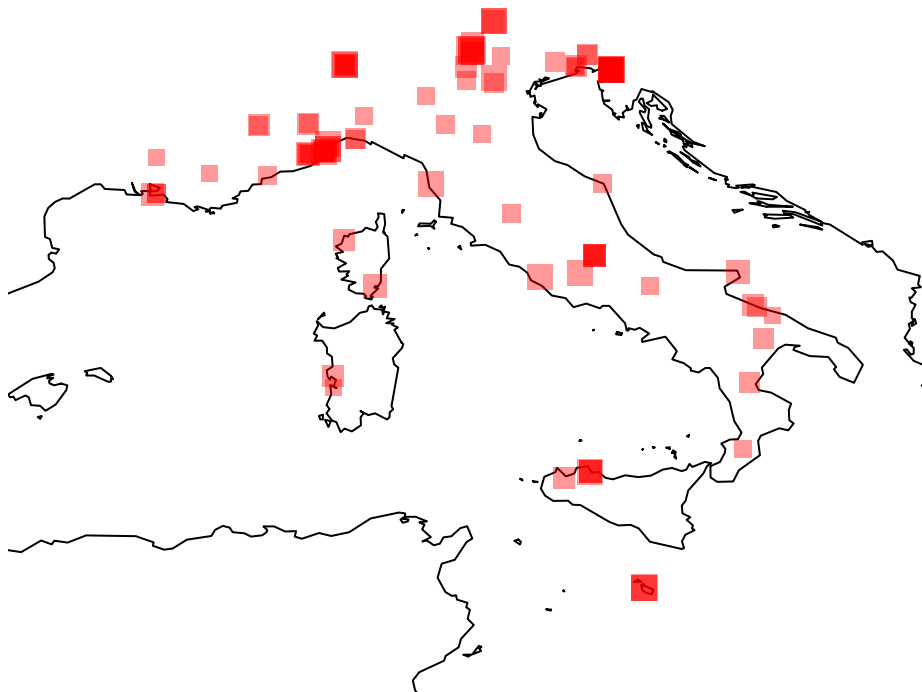



4925 cal. BC

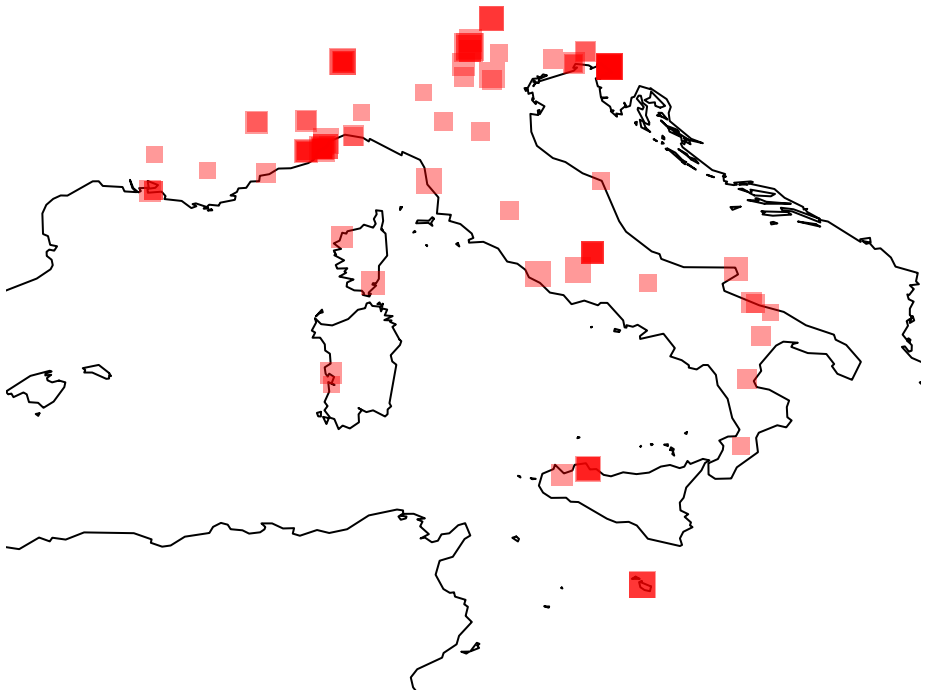

4920 cal. BC

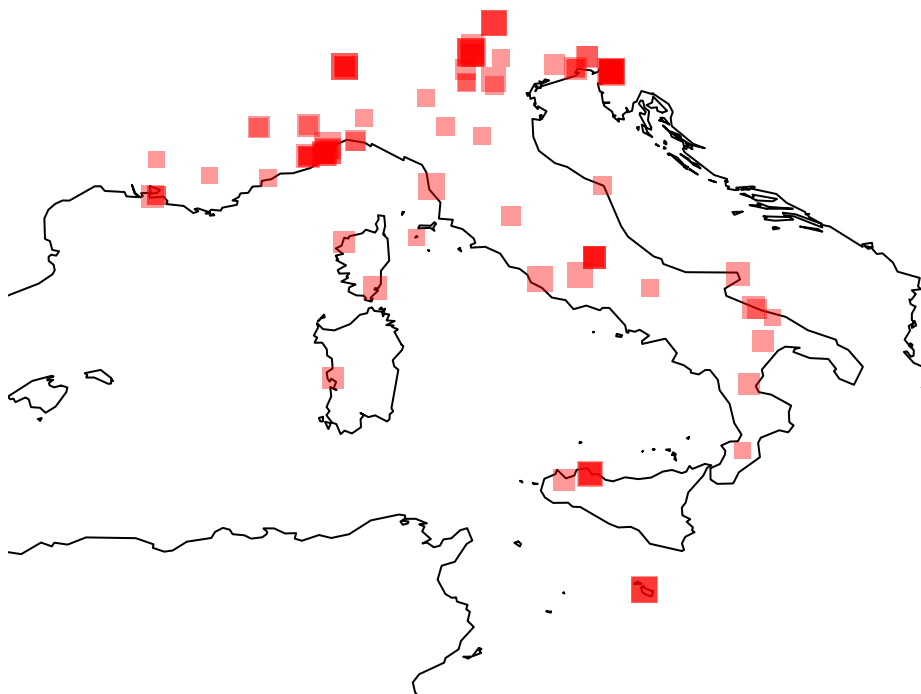

4915 cal. BC

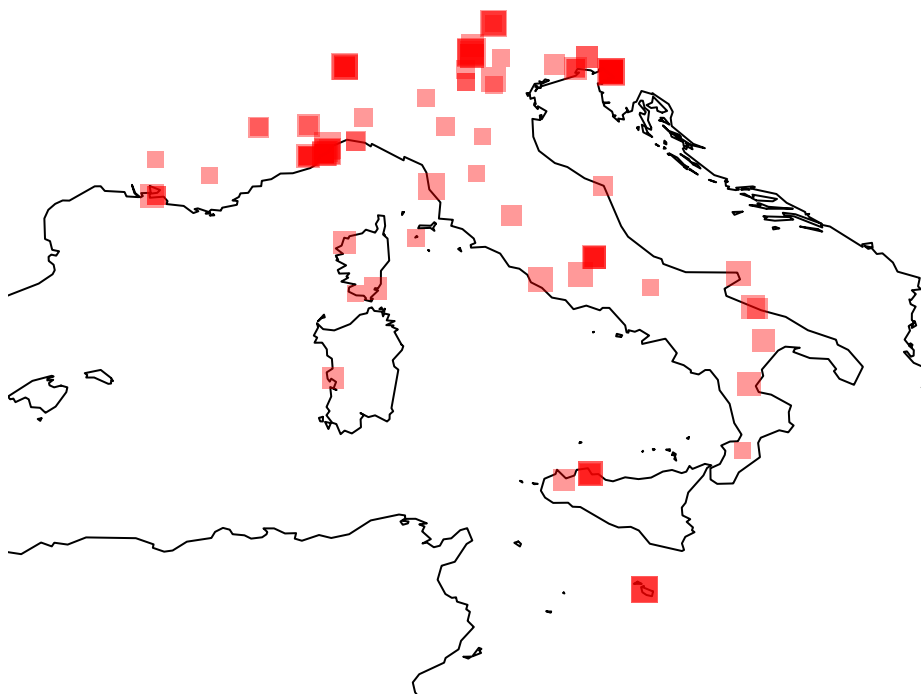

4910 cal. BC

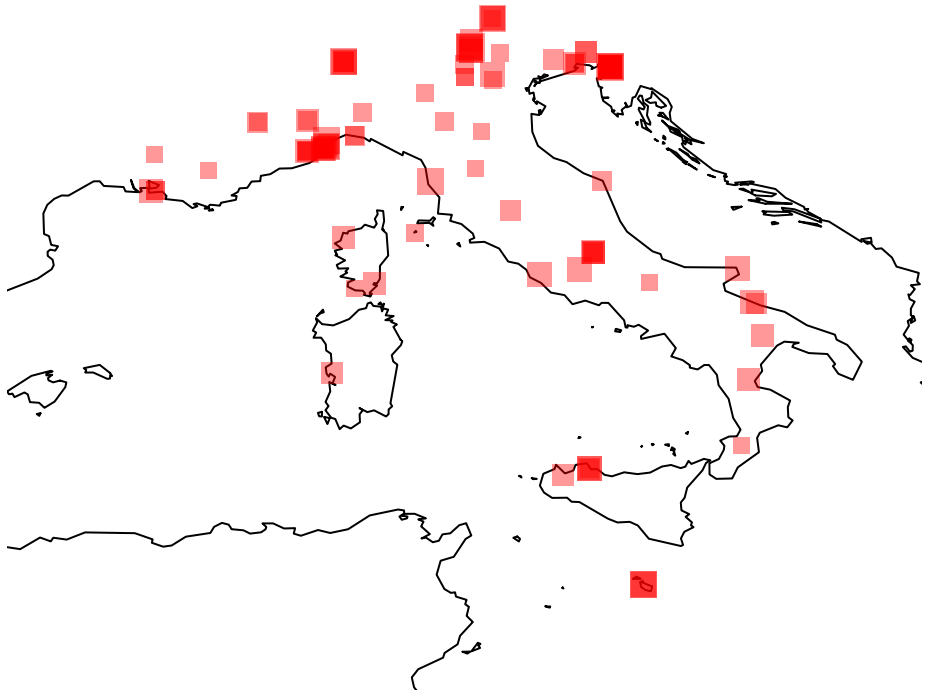

4905 cal. BC

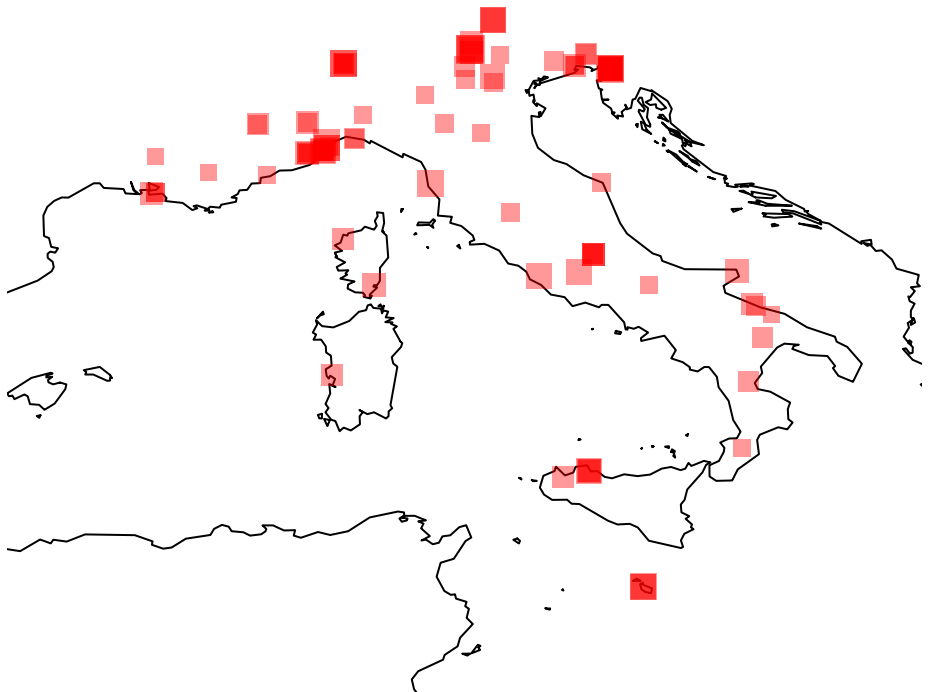

4900 cal. BC

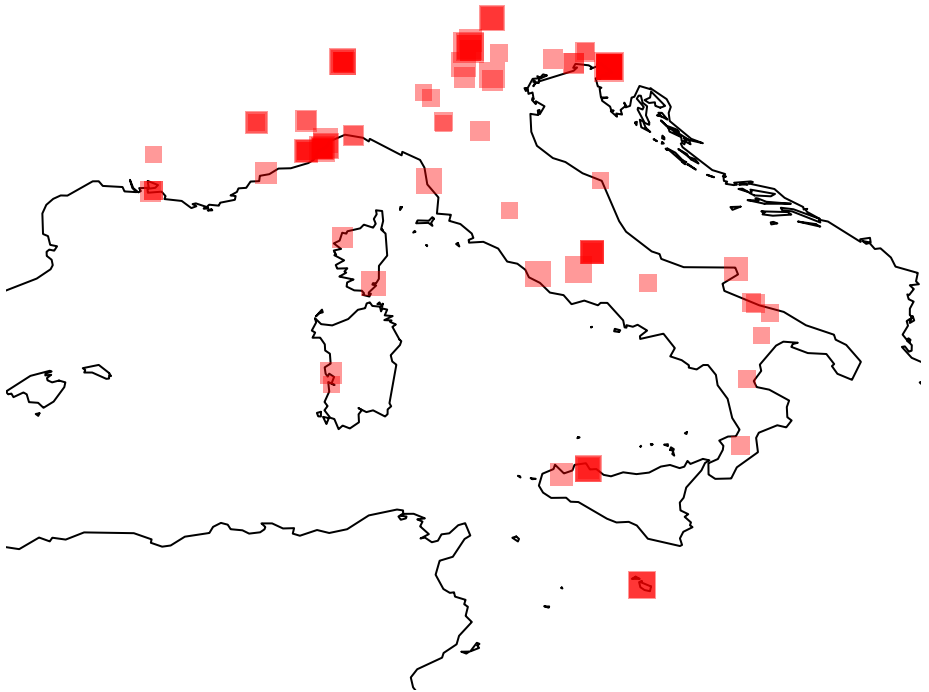

4895 cal. BC

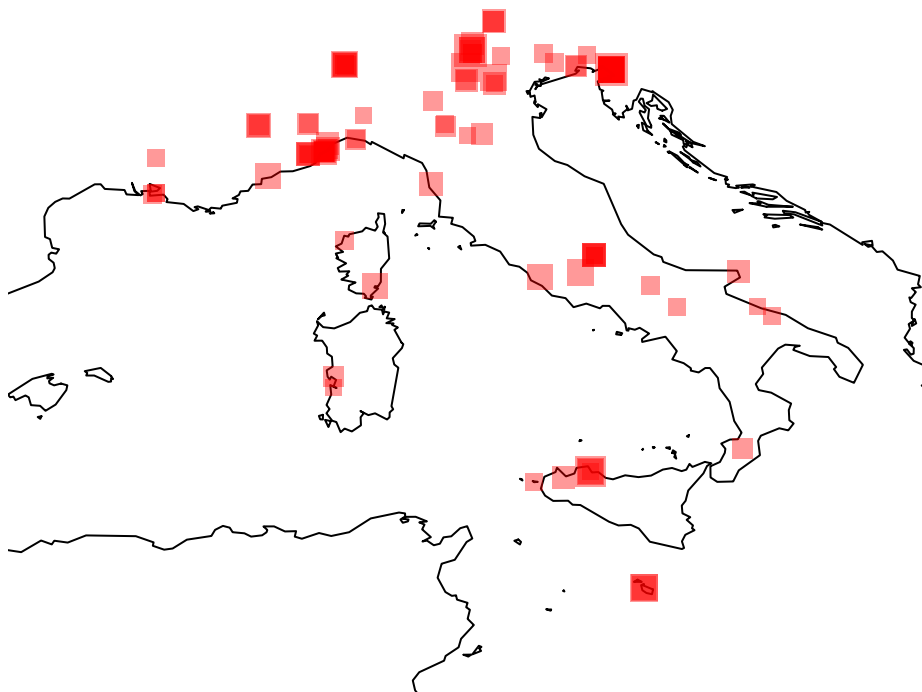

4890 cal. BC

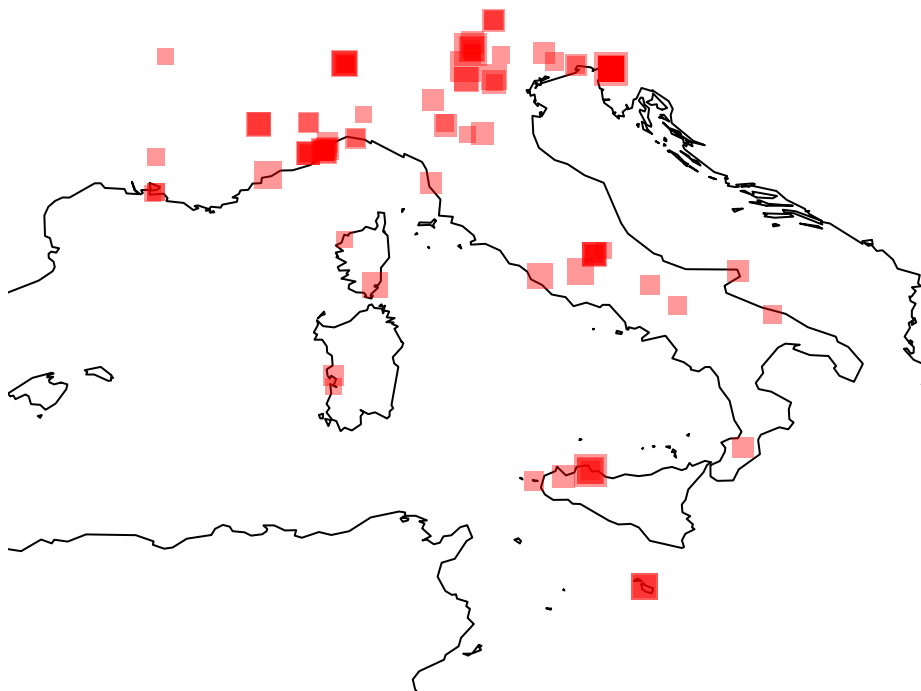



4885 cal. BC

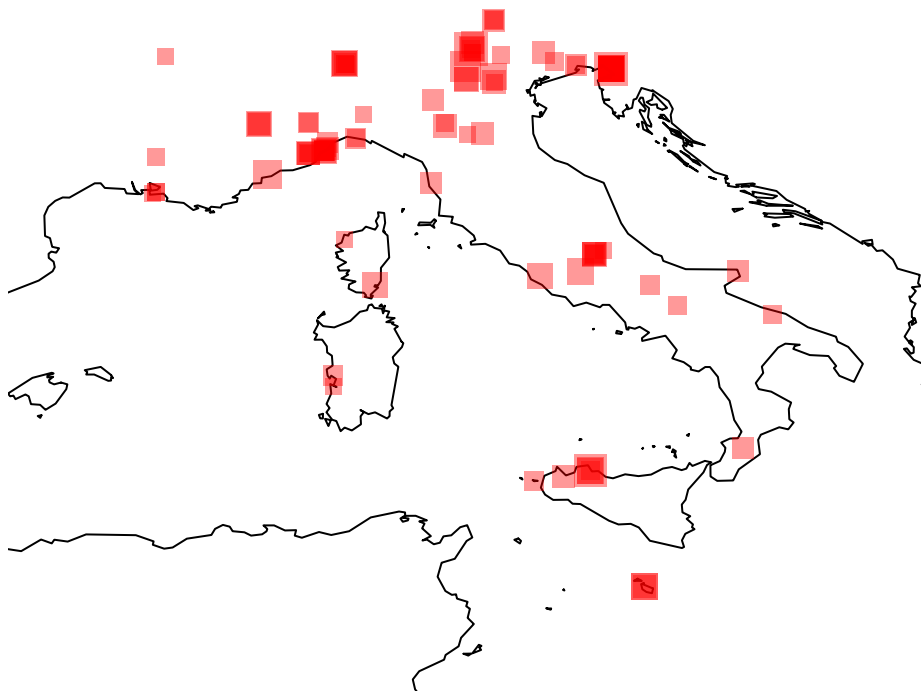

4880 cal. BC

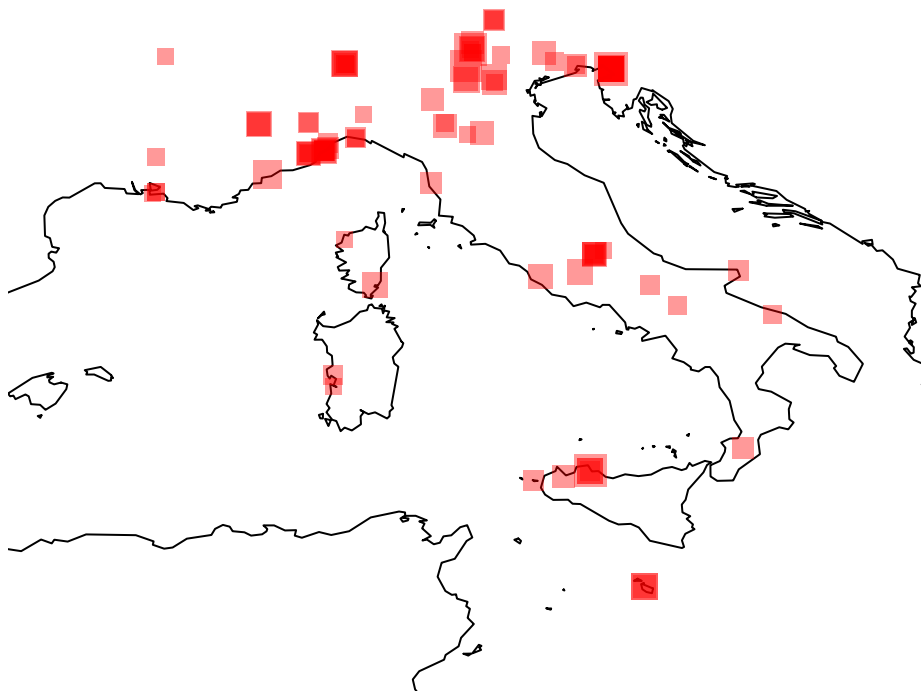

4875 cal. BC

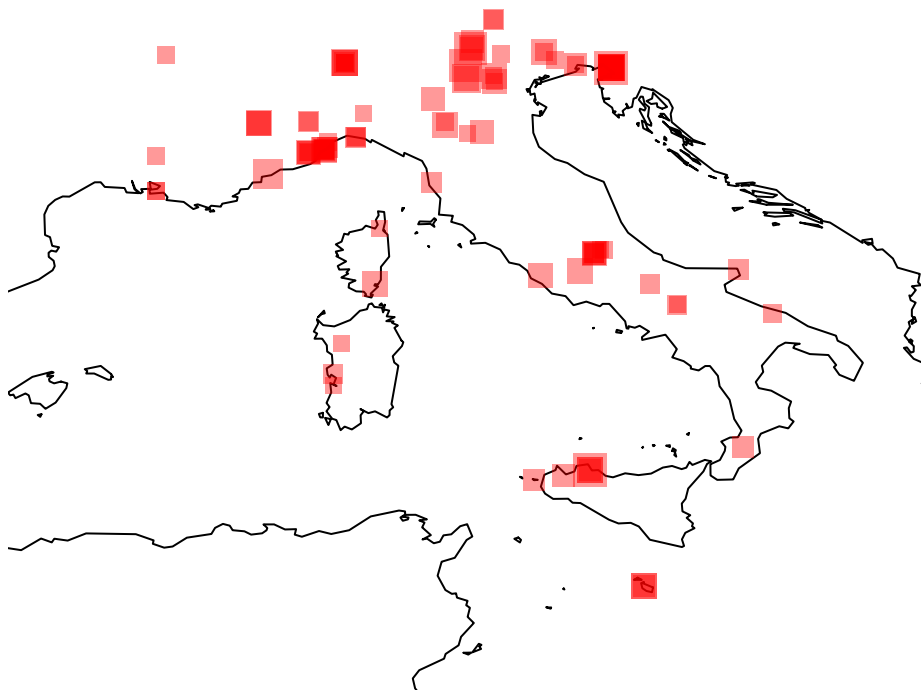

4870 cal. BC

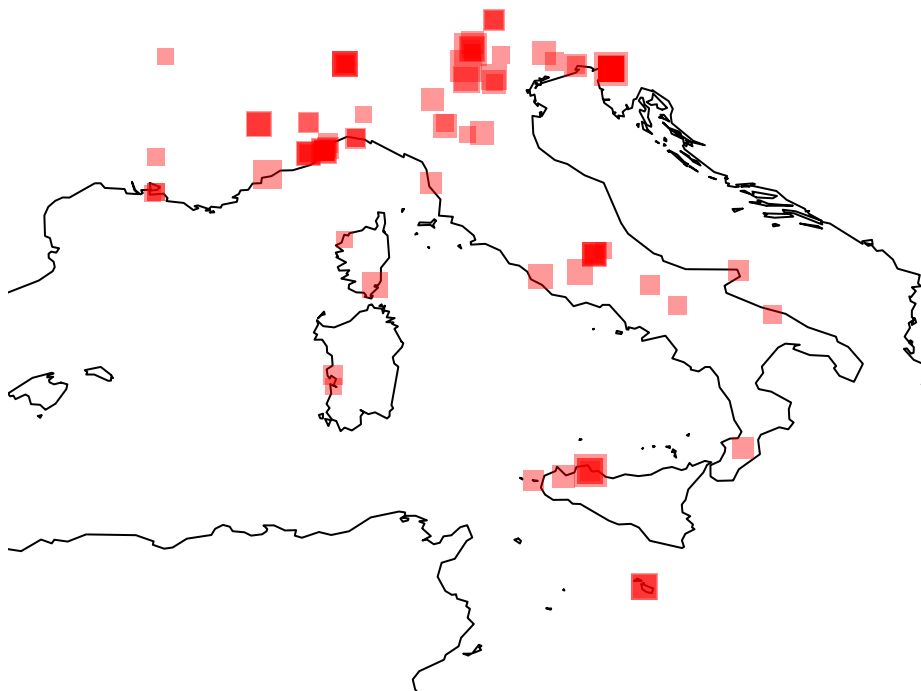

4865 cal. BC

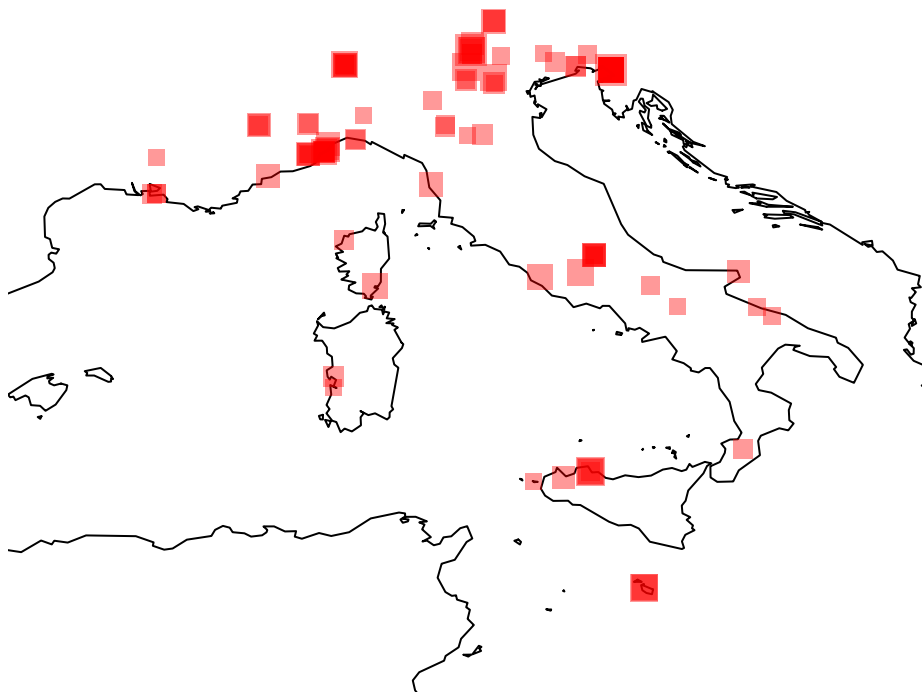

4860 cal. BC

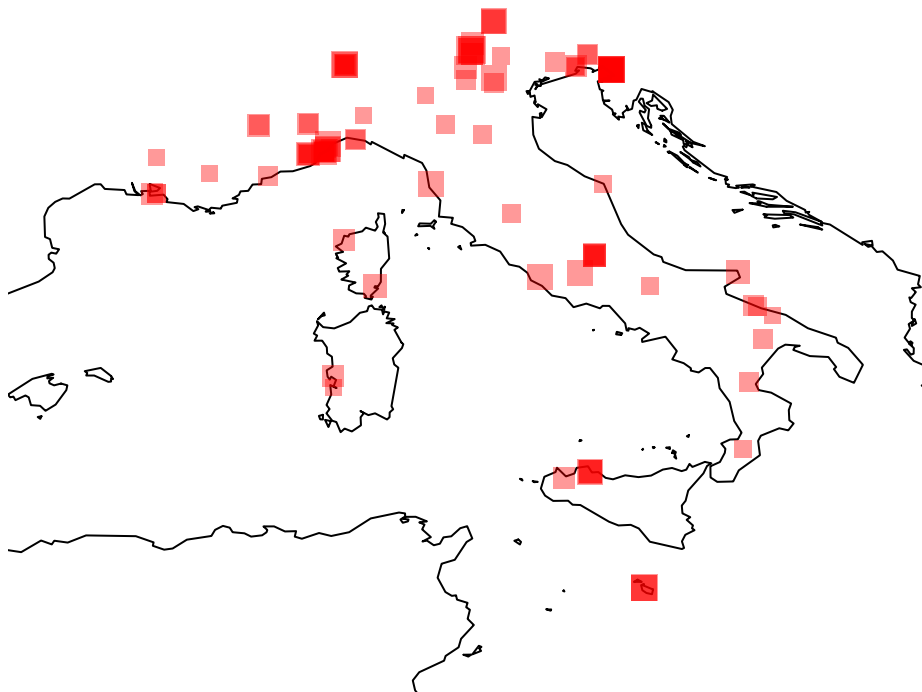

4855 cal. BC

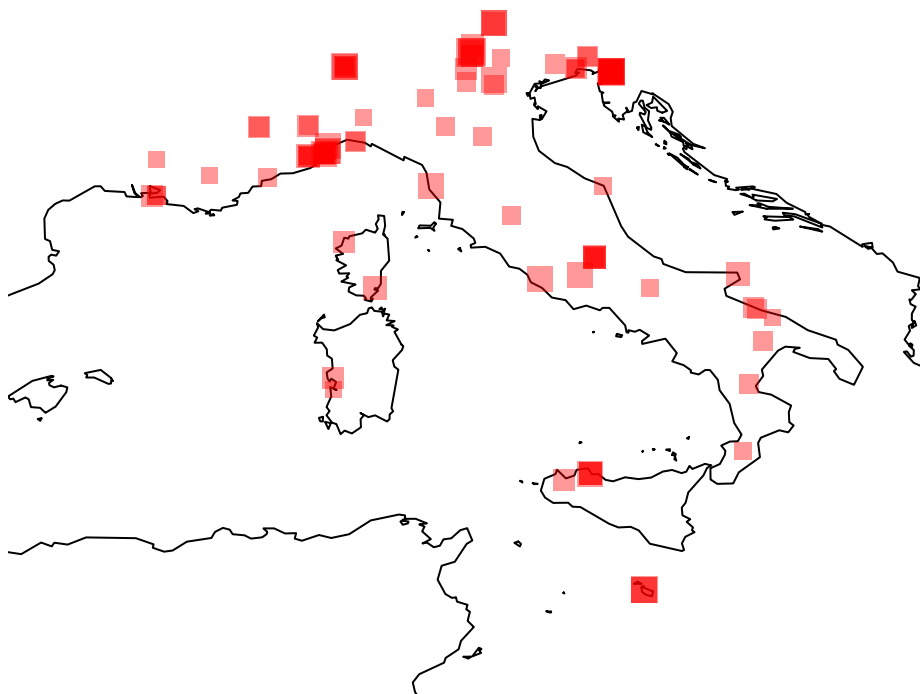

4850 cal. BC

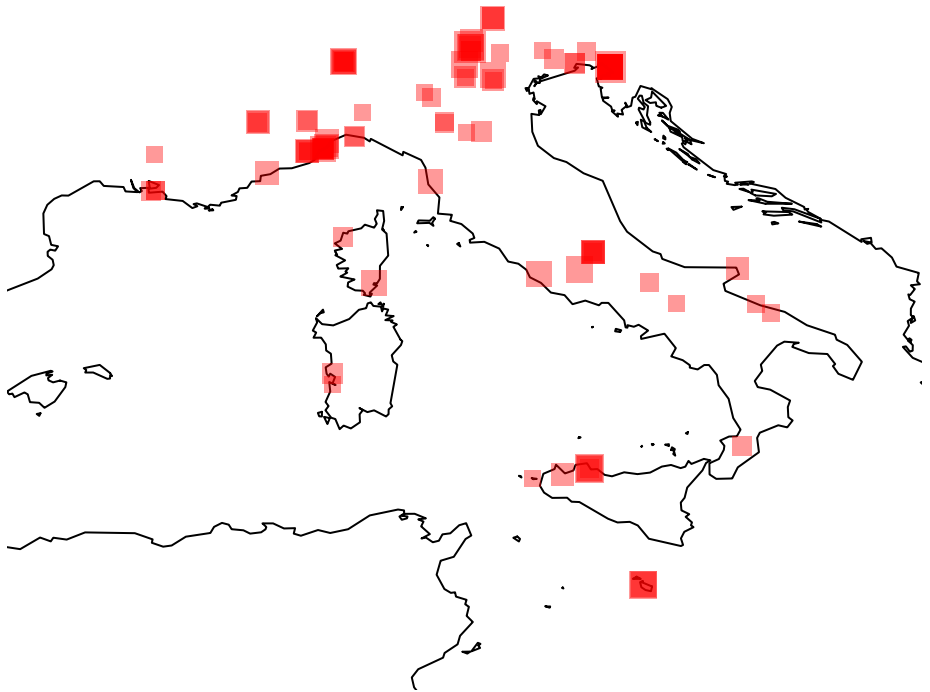



4845 cal. BC

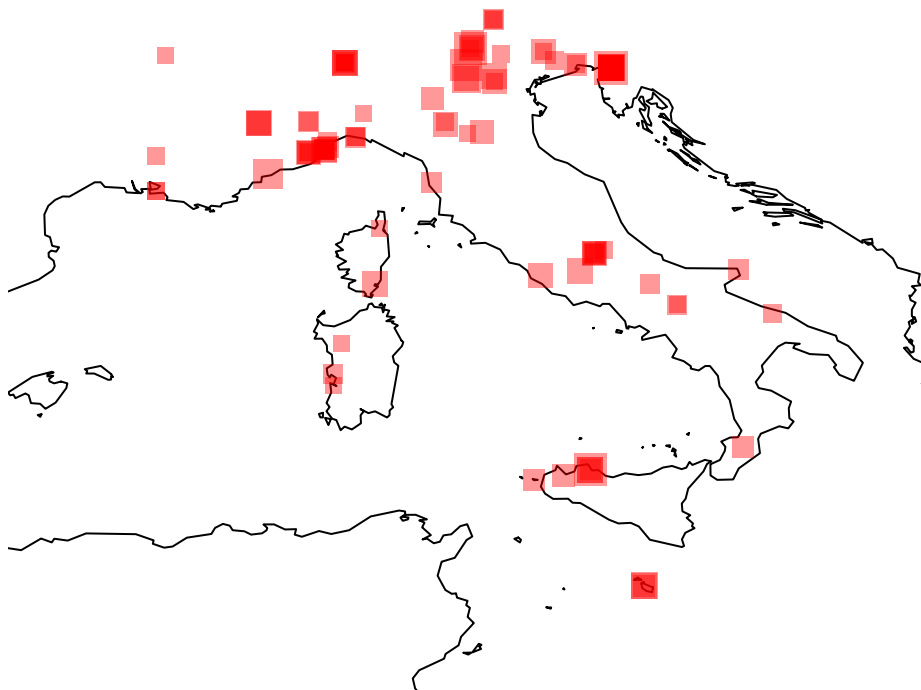

4840 cal. BC

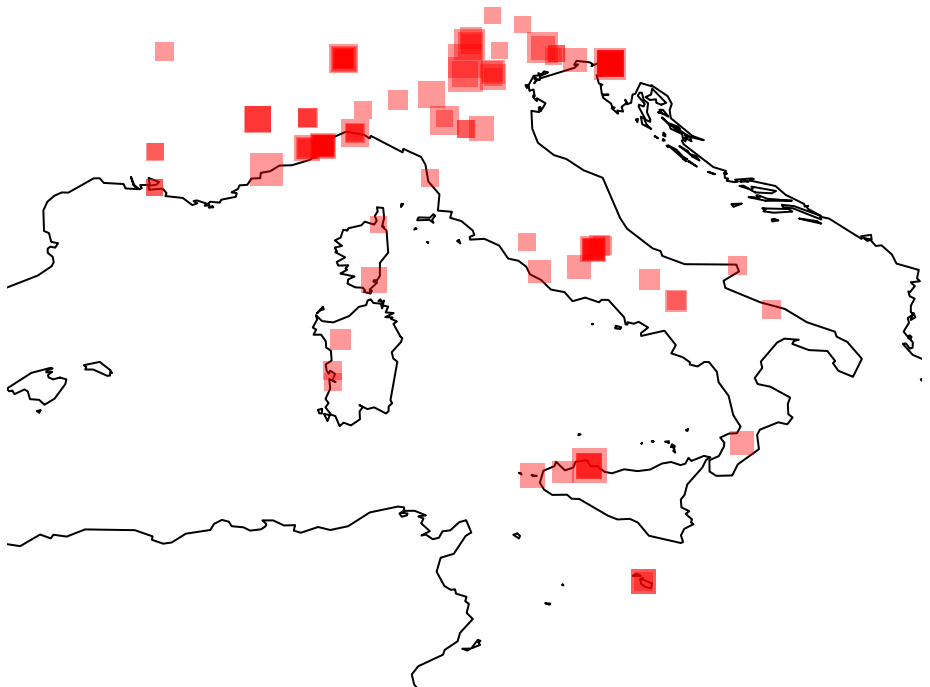

4835 cal. BC

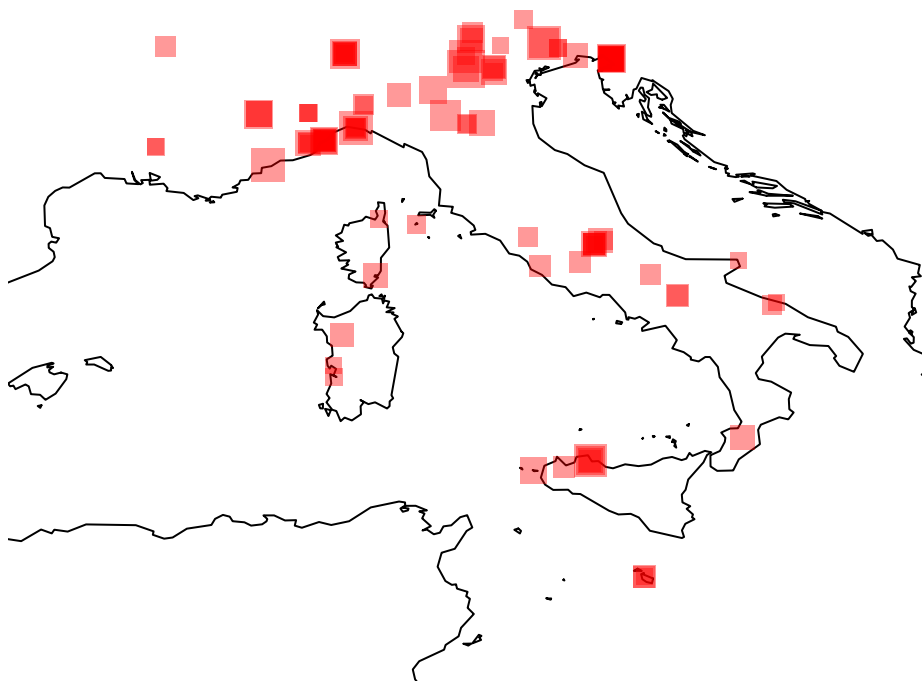

4830 cal. BC

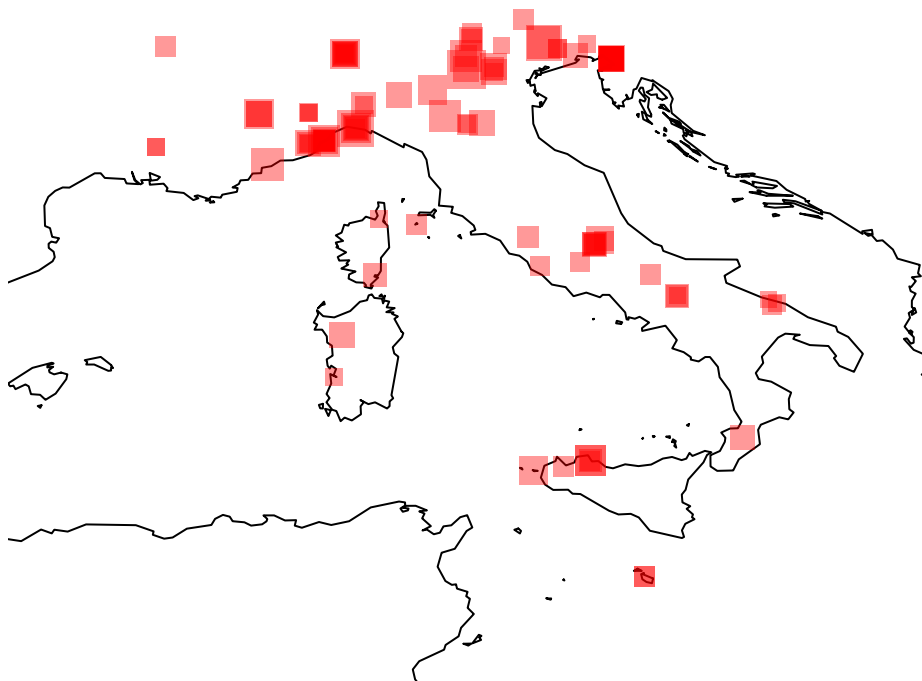

4825 cal. BC

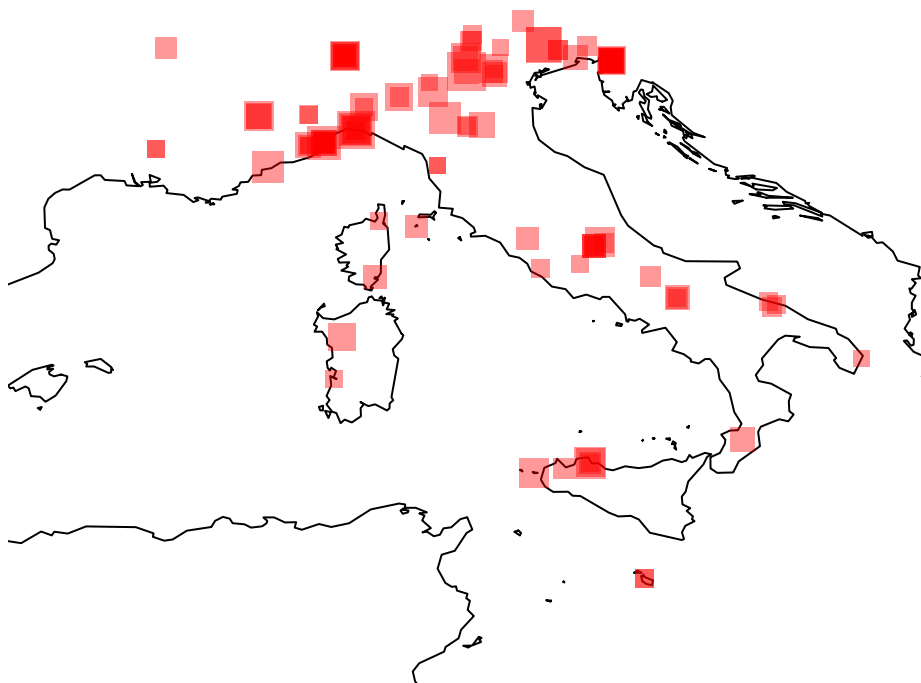

4820 cal. BC

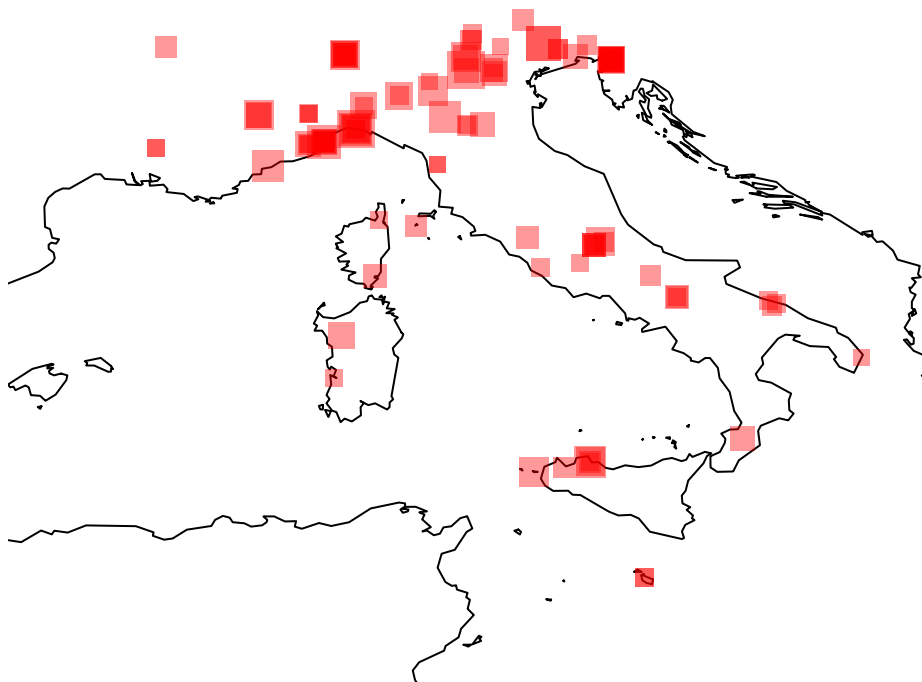

4815 cal. BC

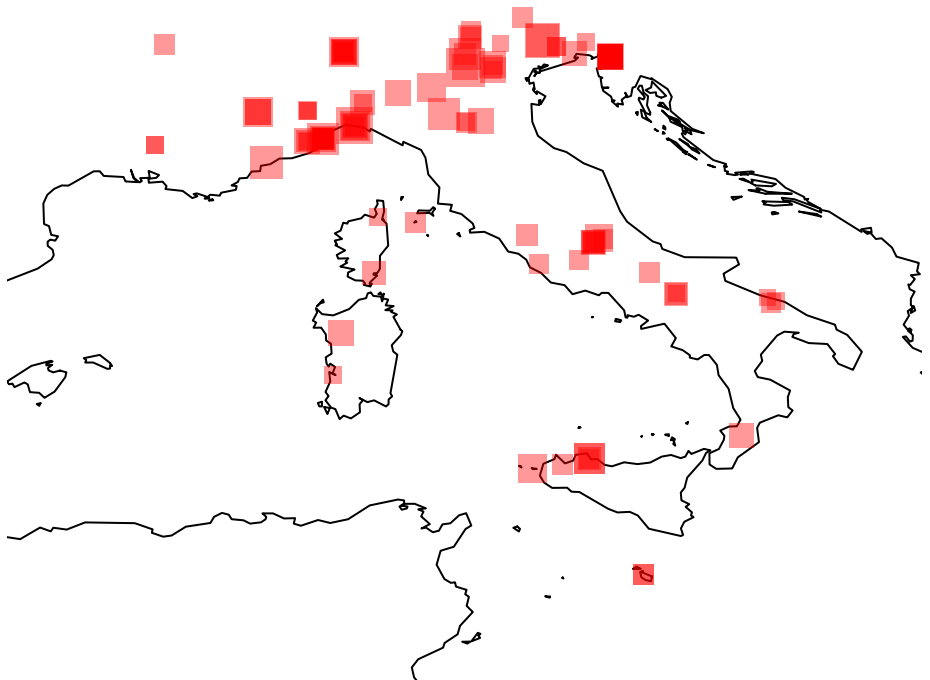

4810 cal. BC

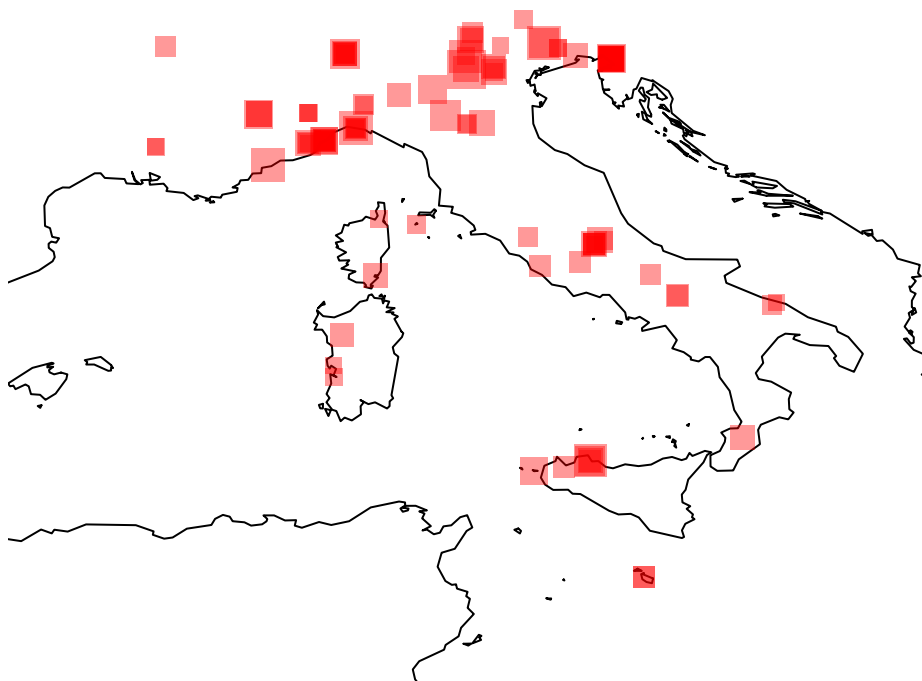



4805 cal. BC

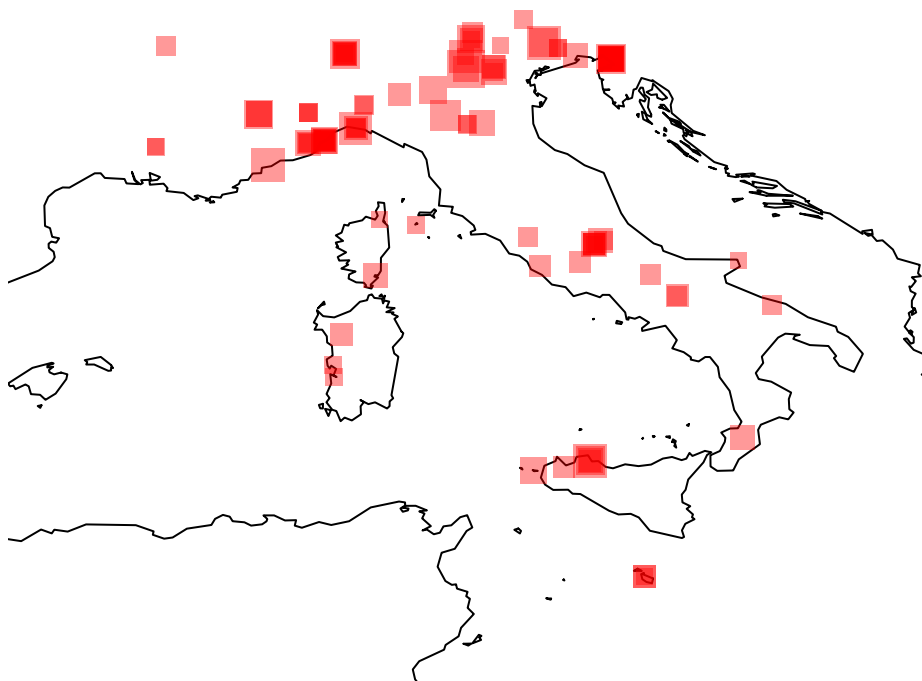

4800 cal. BC

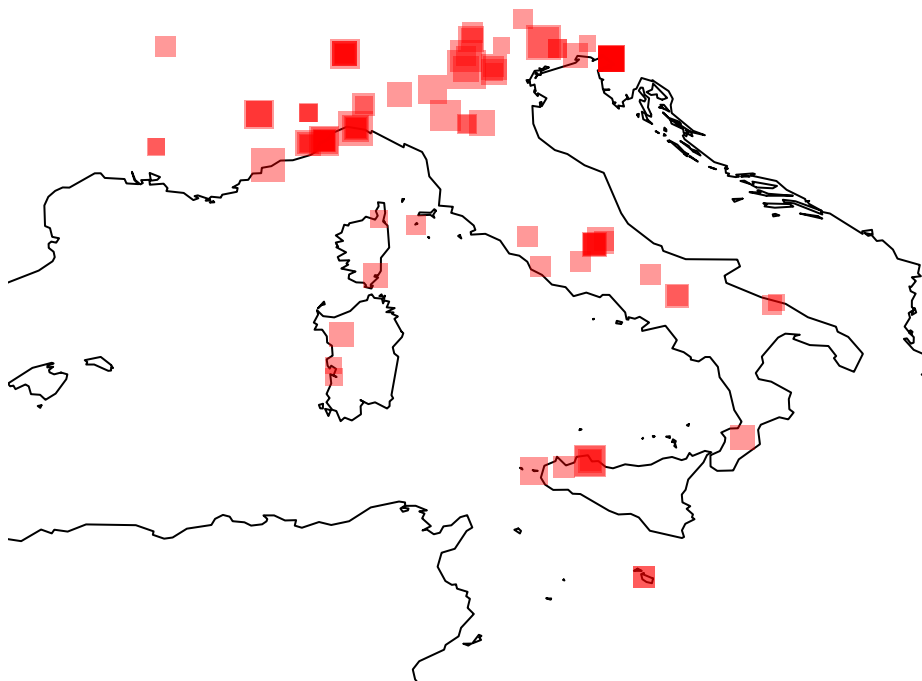

4795 cal. BC

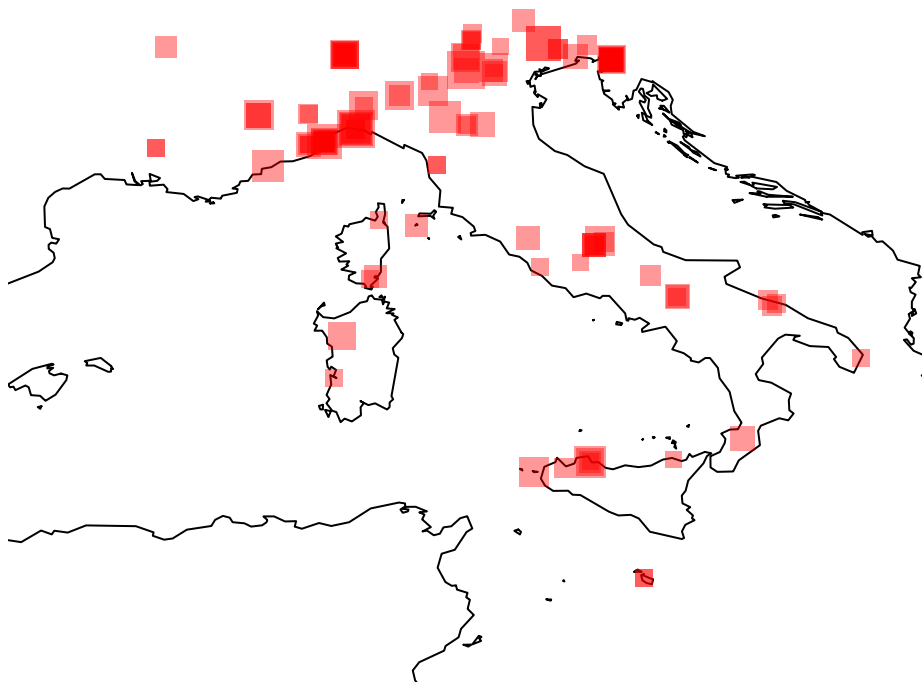

4790 cal. BC

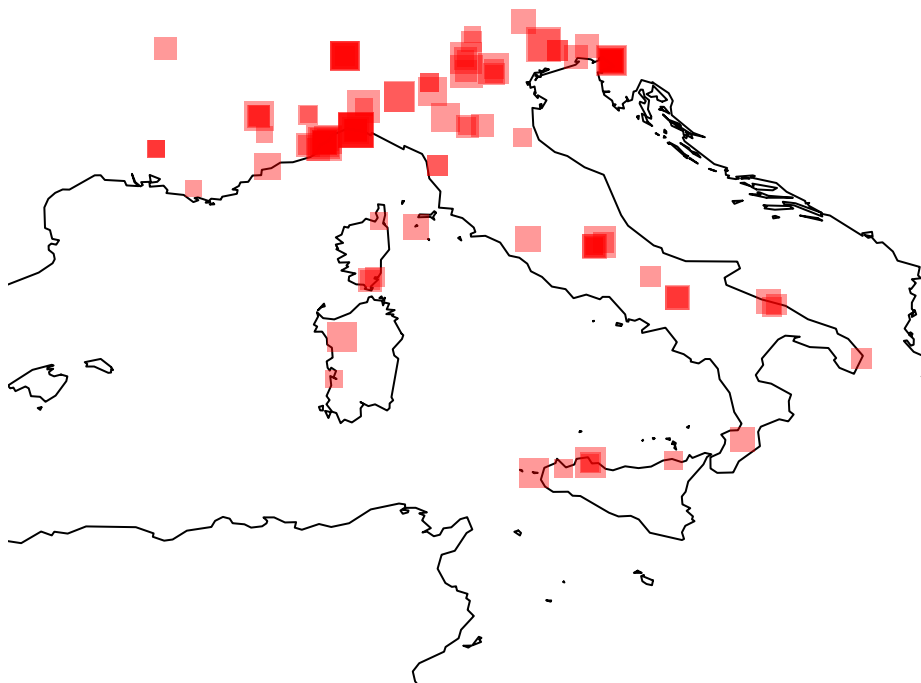

4785 cal. BC

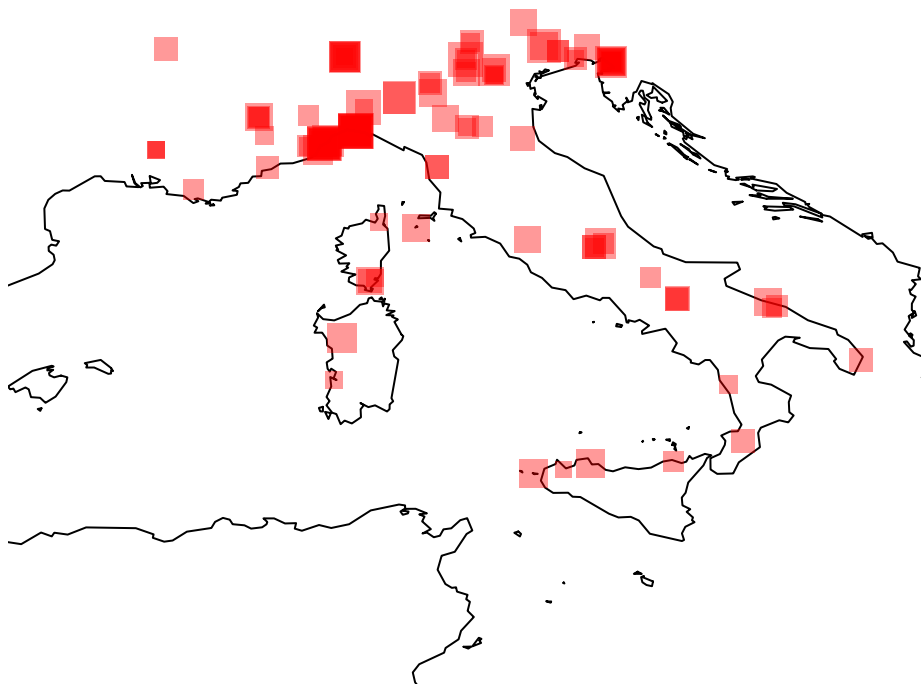

4780 cal. BC

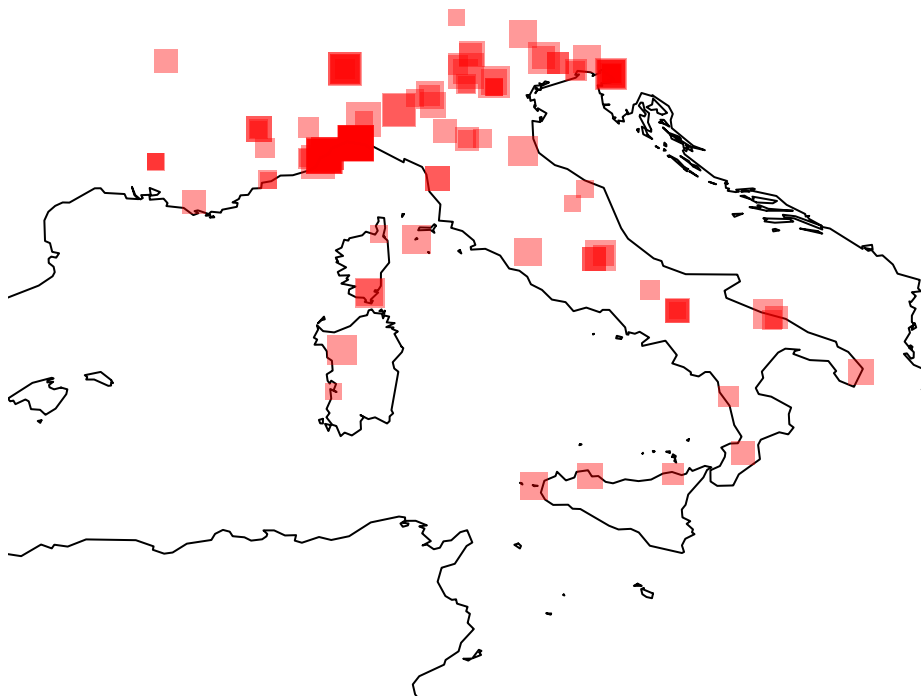

4775 cal. BC

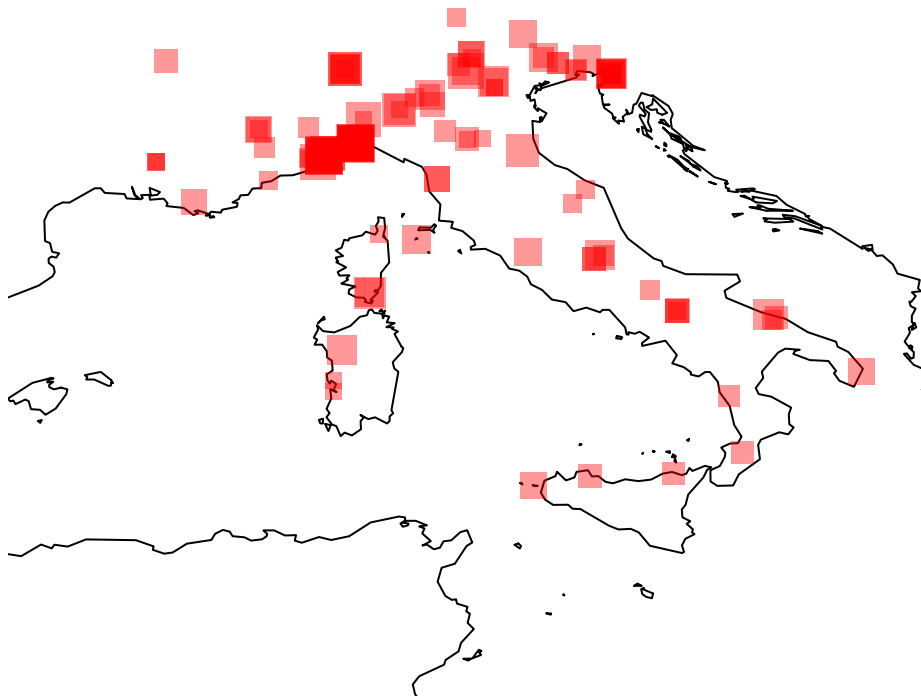

4770 cal. BC

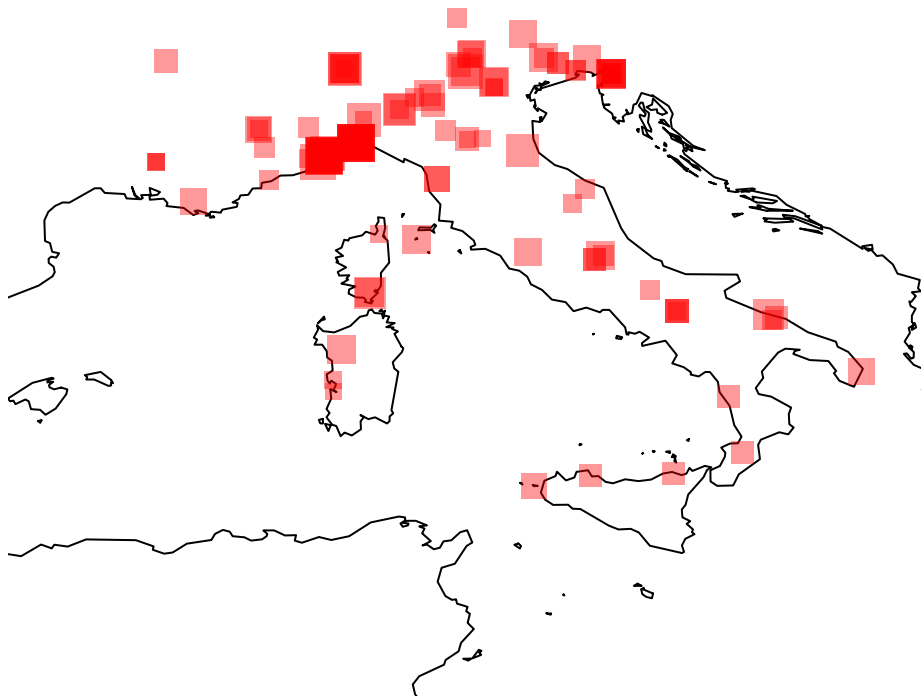



4765 cal. BC

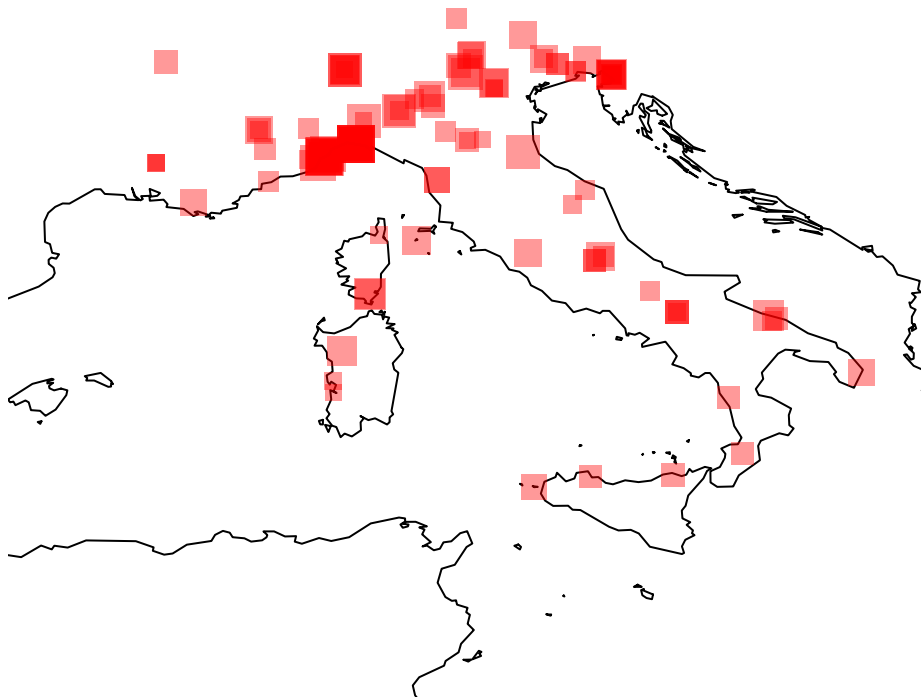

4760 cal. BC

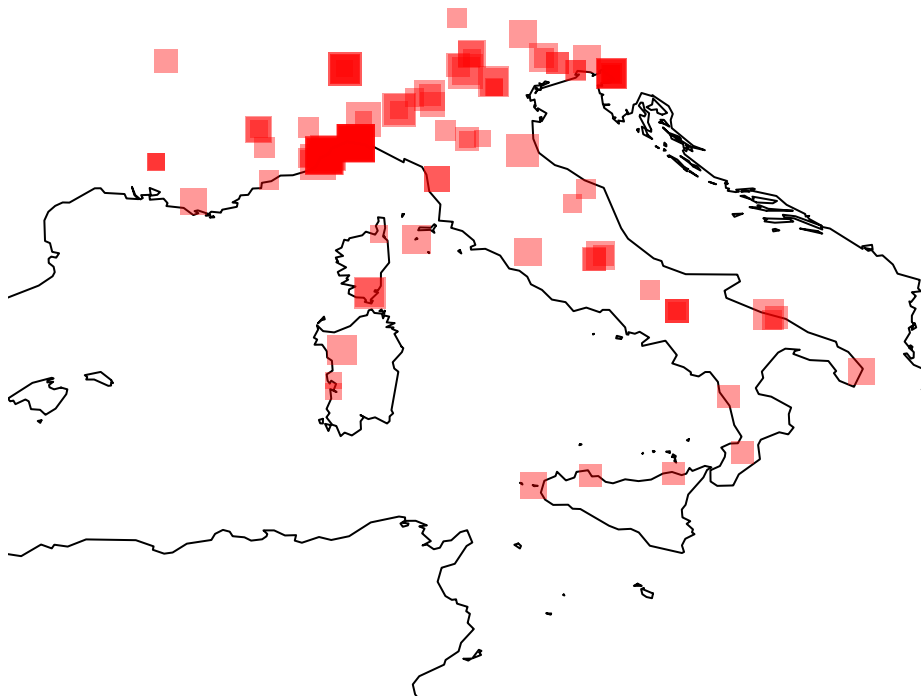

4755 cal. BC

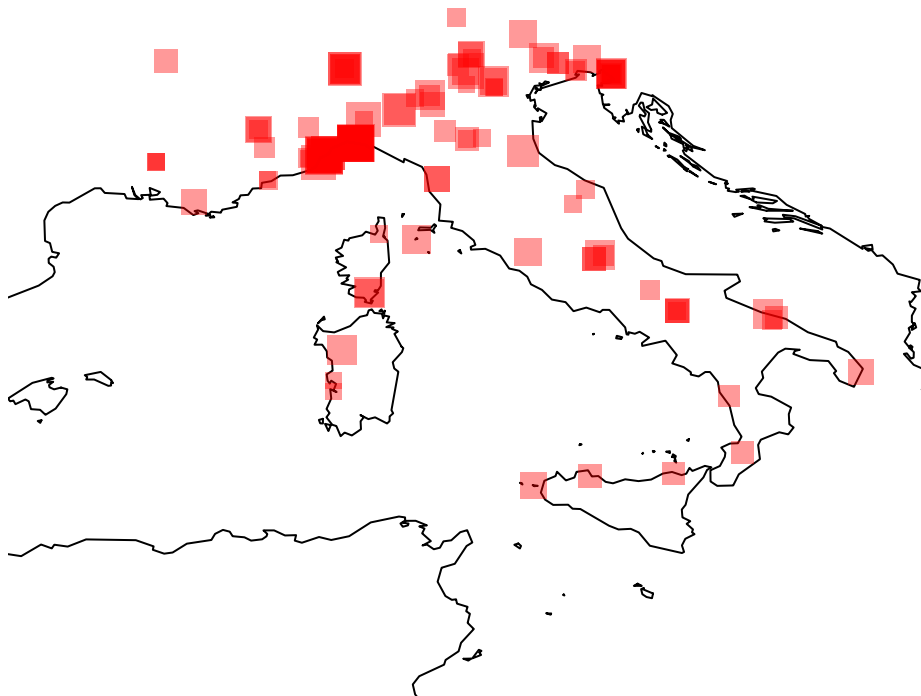

4750 cal. BC

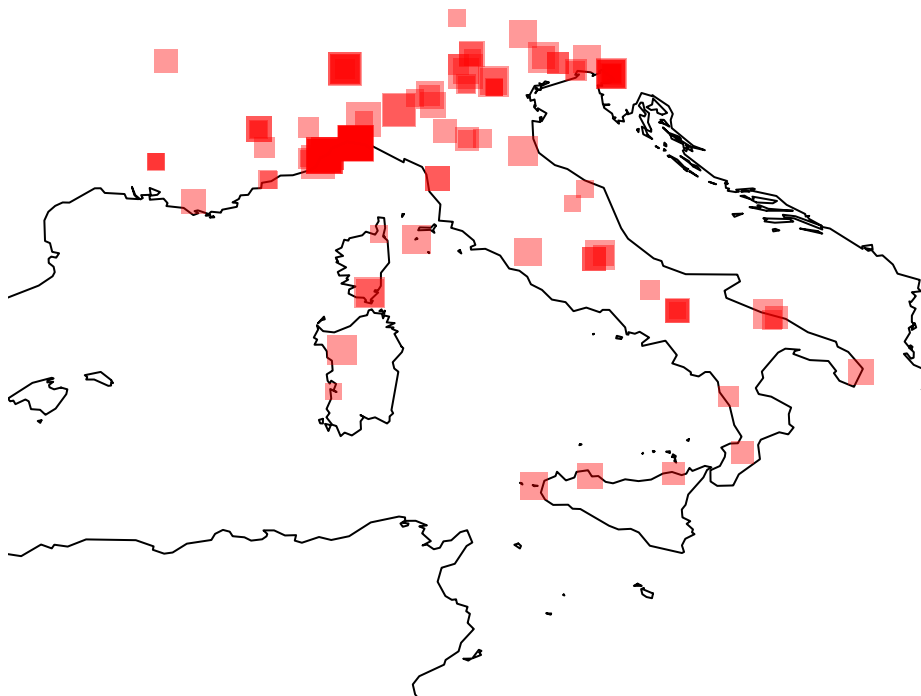

4745 cal. BC

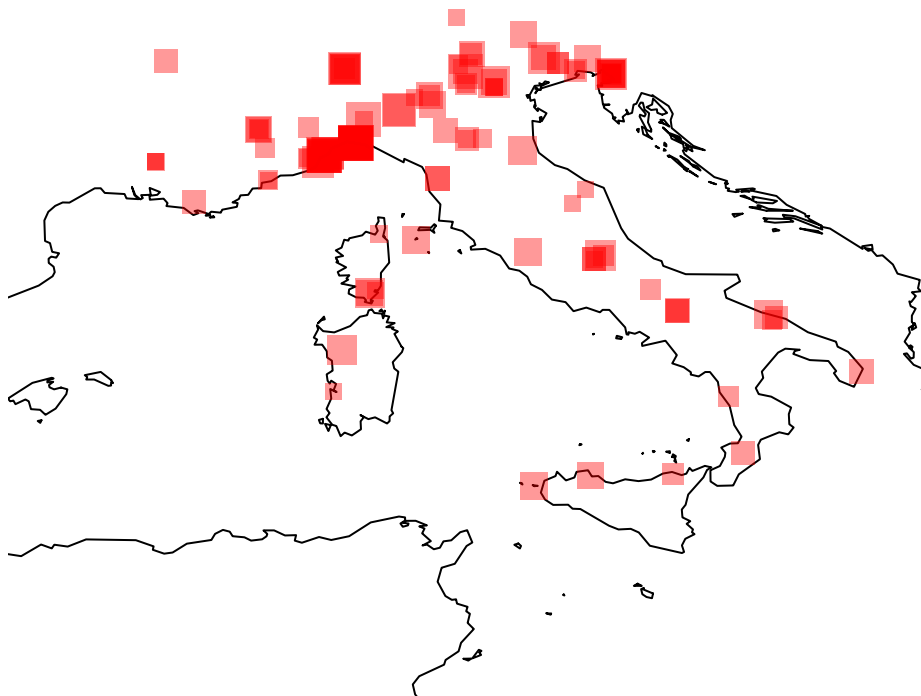

4740 cal. BC

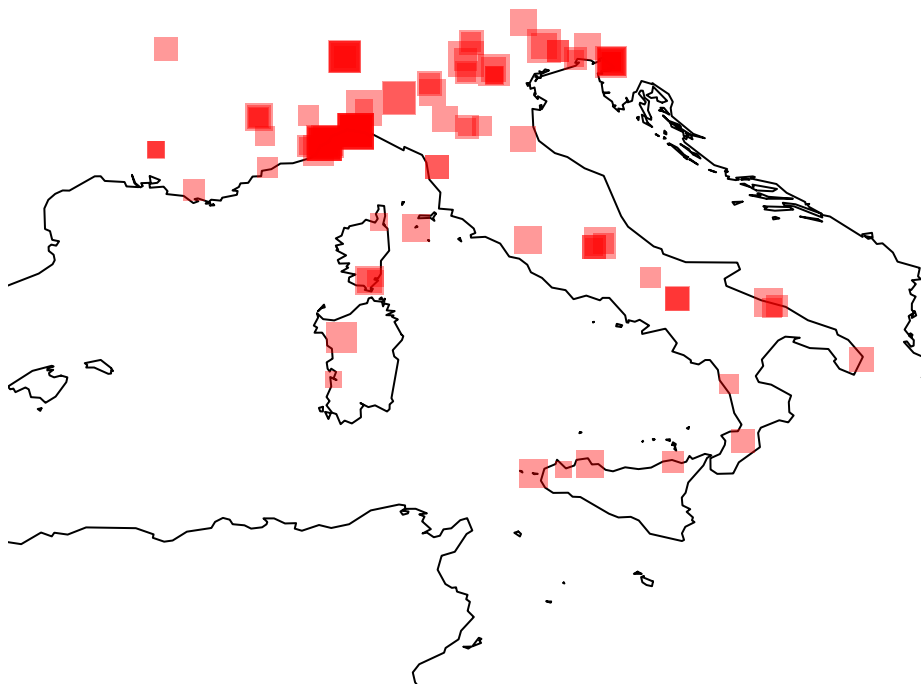

4735 cal. BC

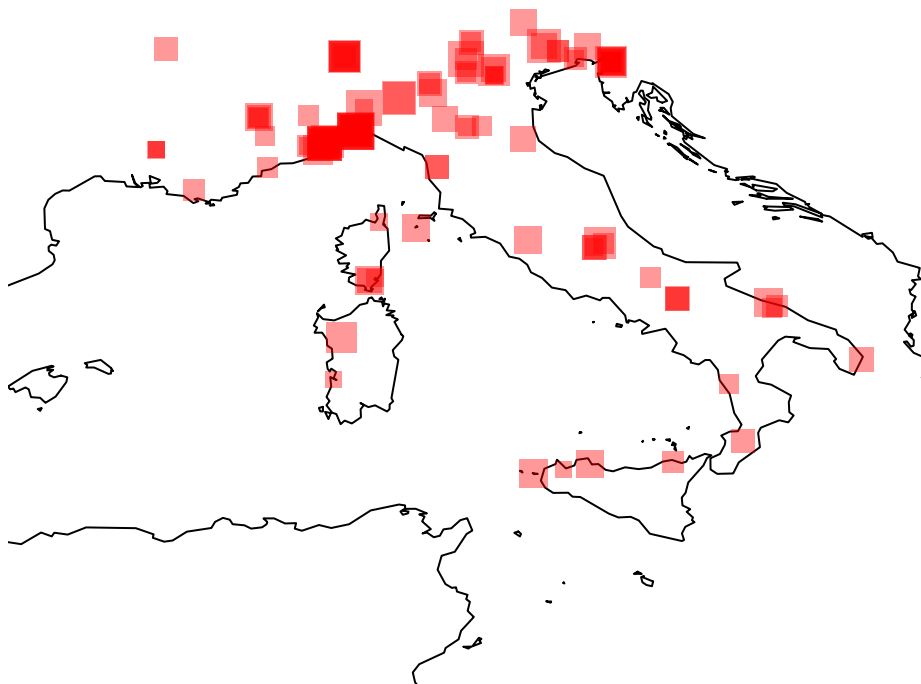

4730 cal. BC

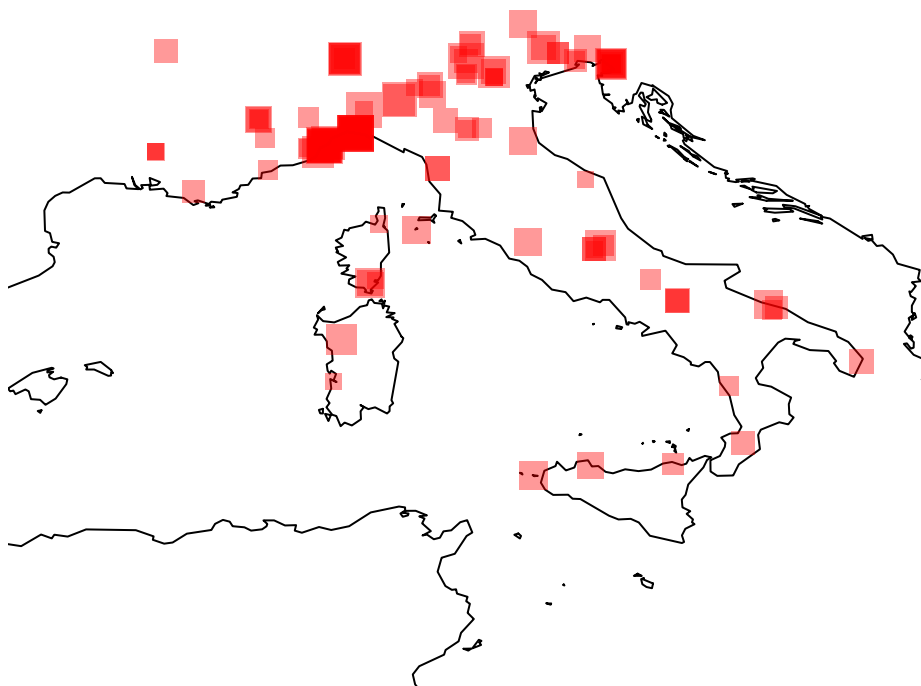



4725 cal. BC

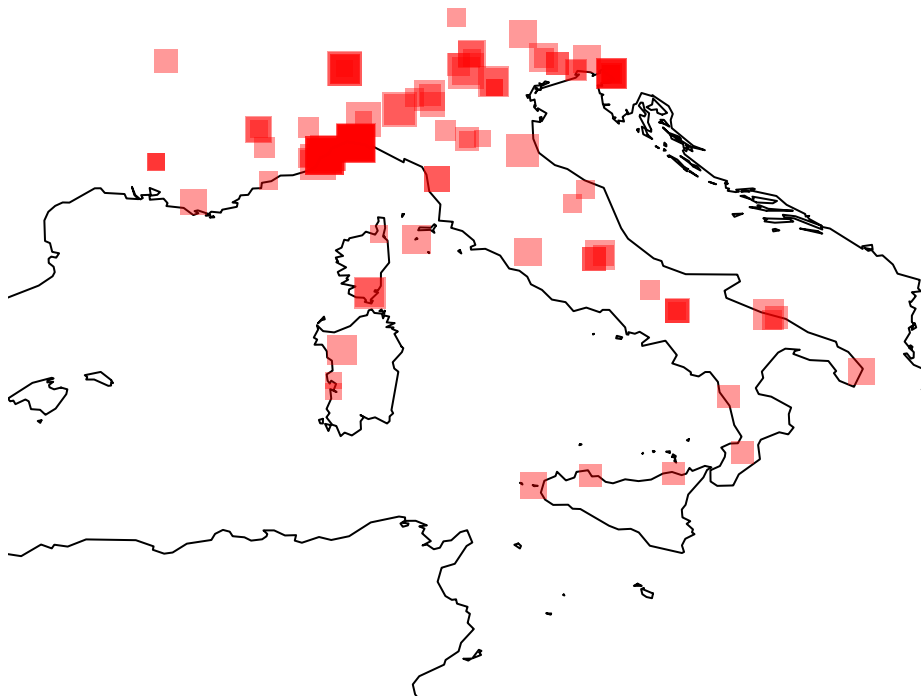

4720 cal. BC

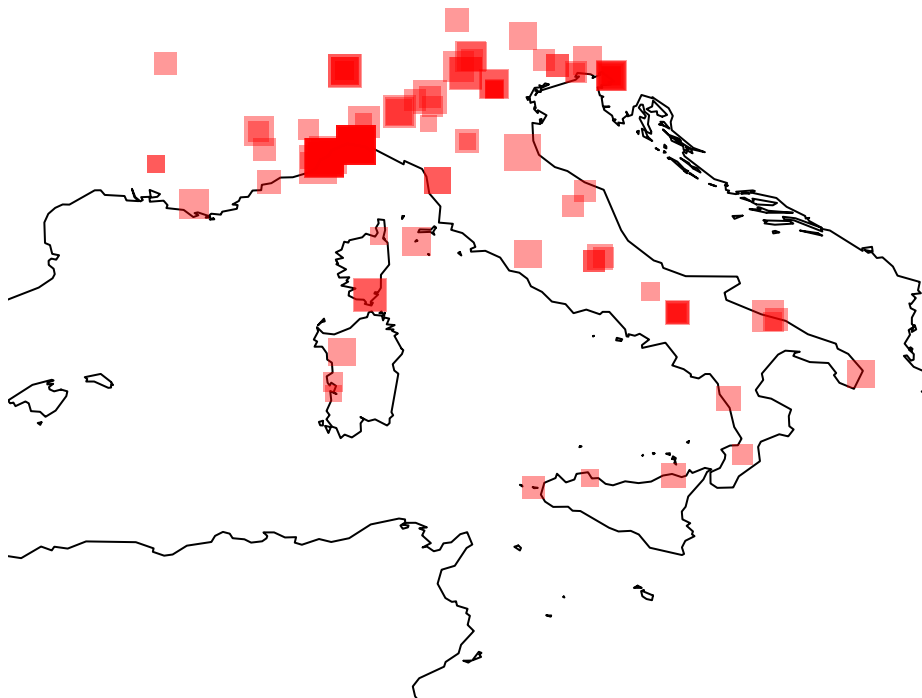

4715 cal. BC

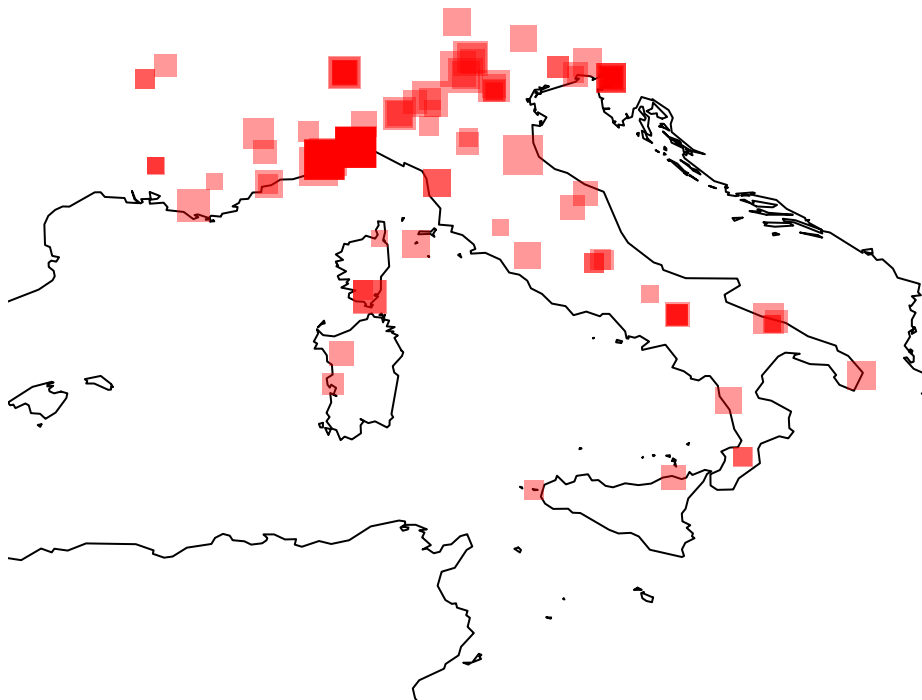

4710 cal. BC

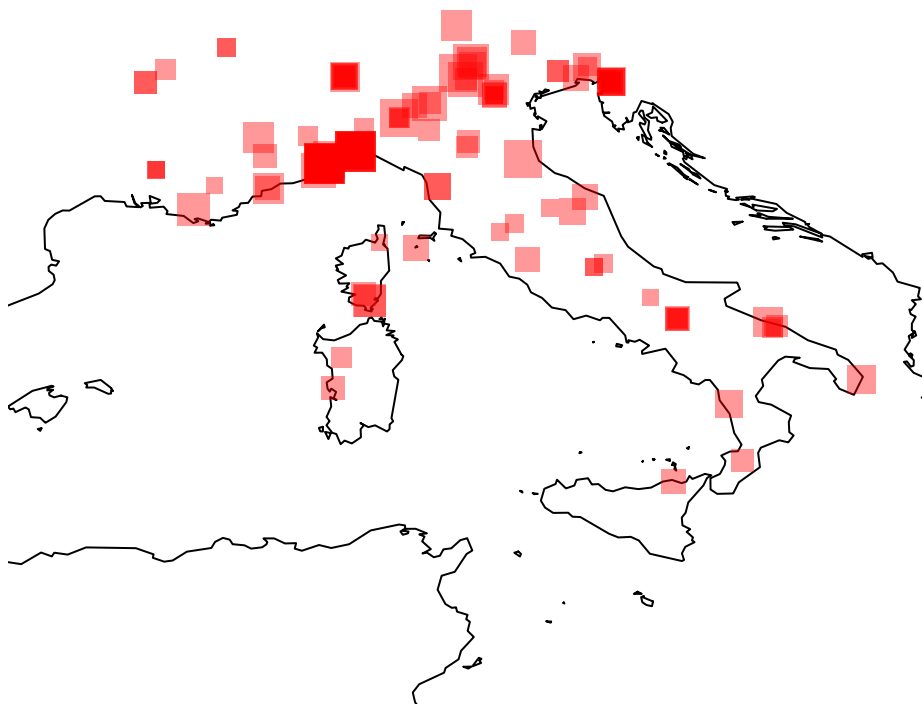

4705 cal. BC

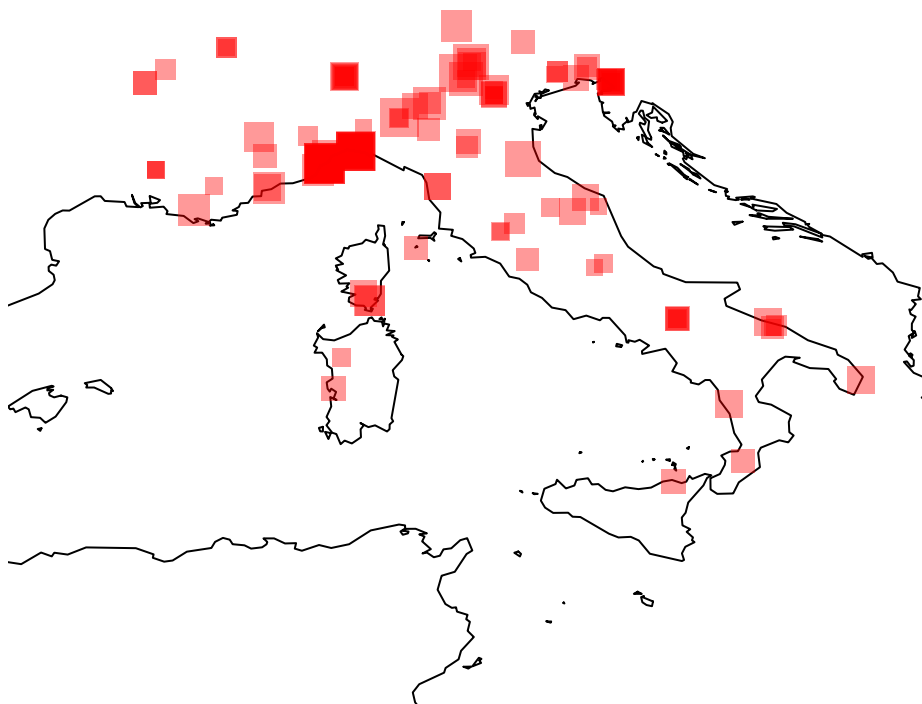

4700 cal. BC

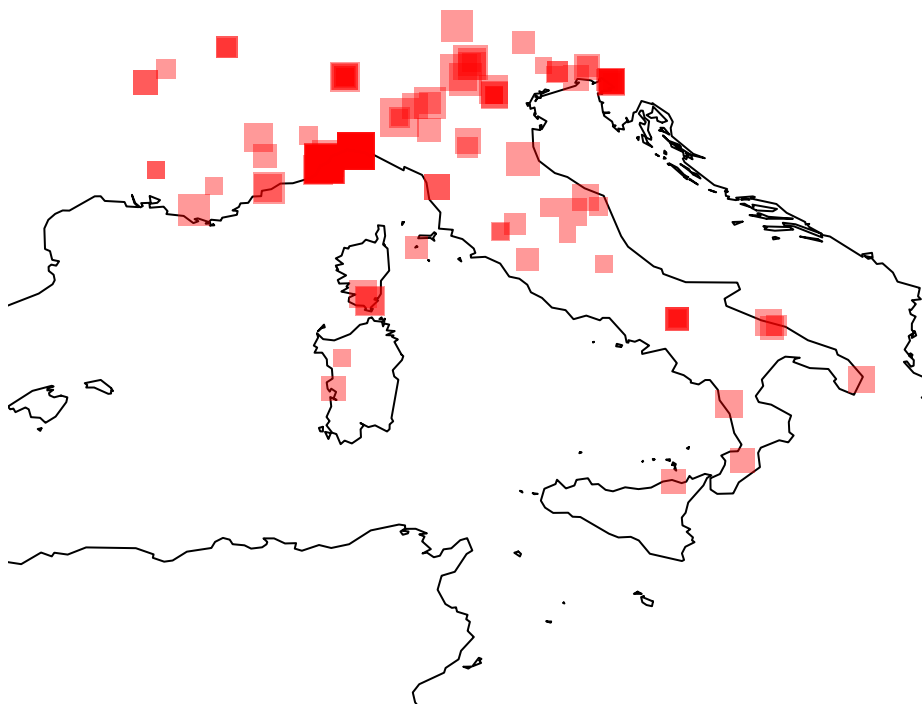

4695 cal. BC

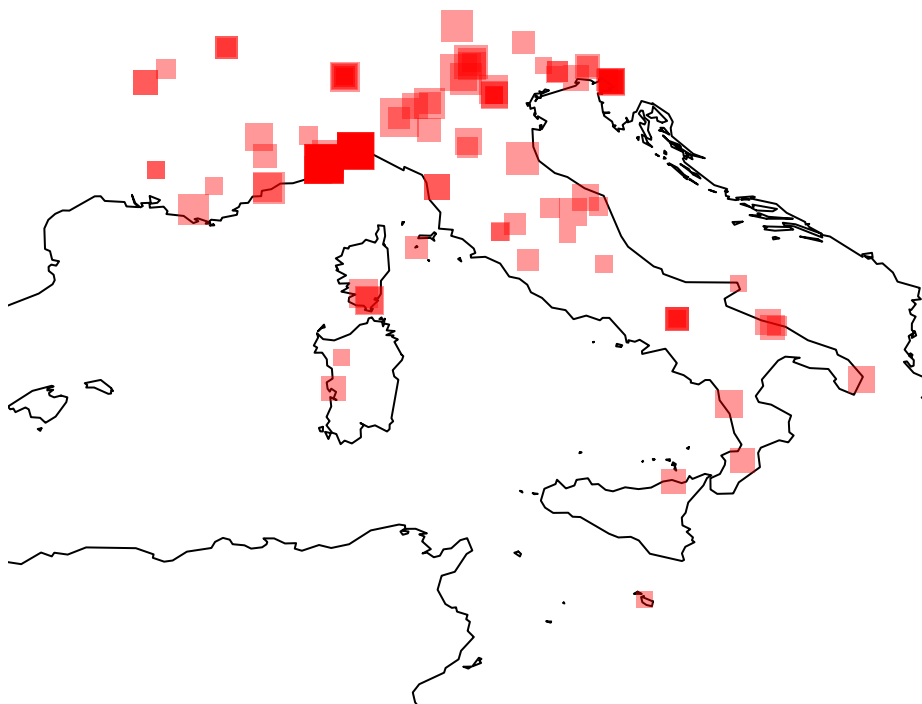

4690 cal. BC

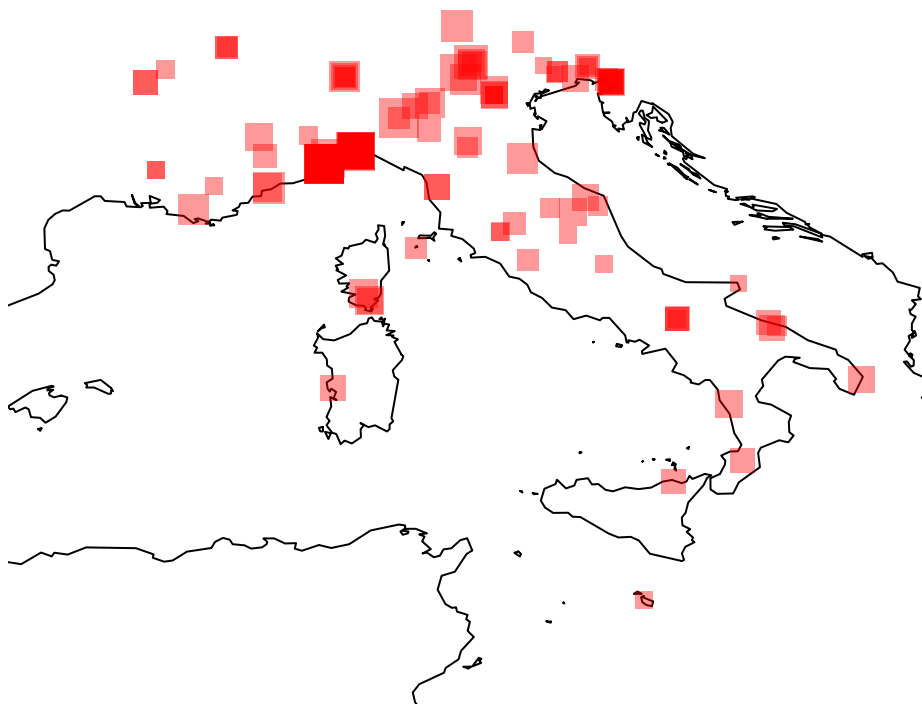



4685 cal. BC

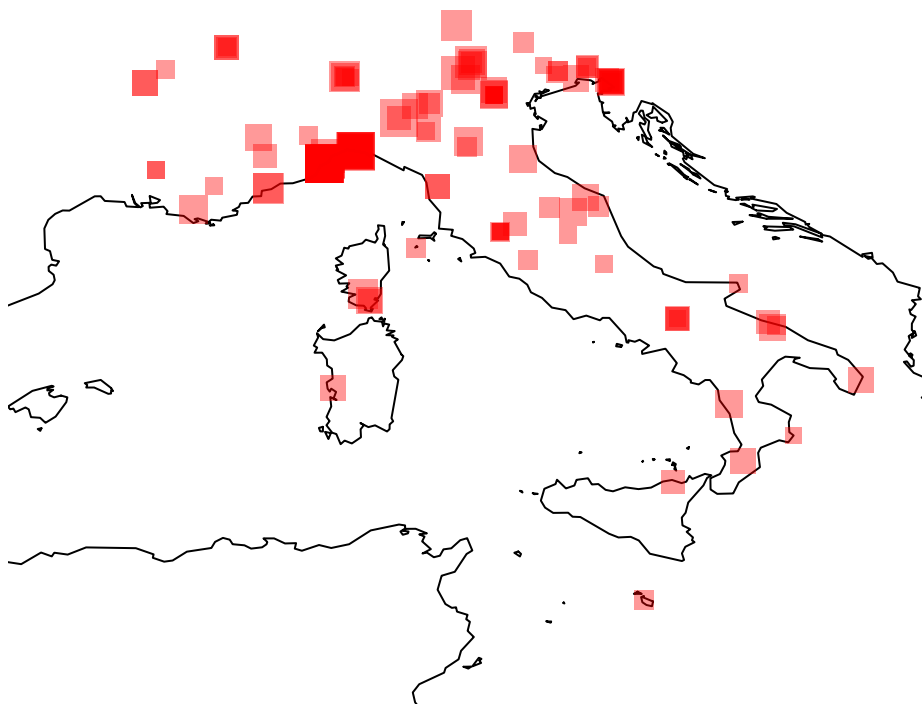

4680 cal. BC

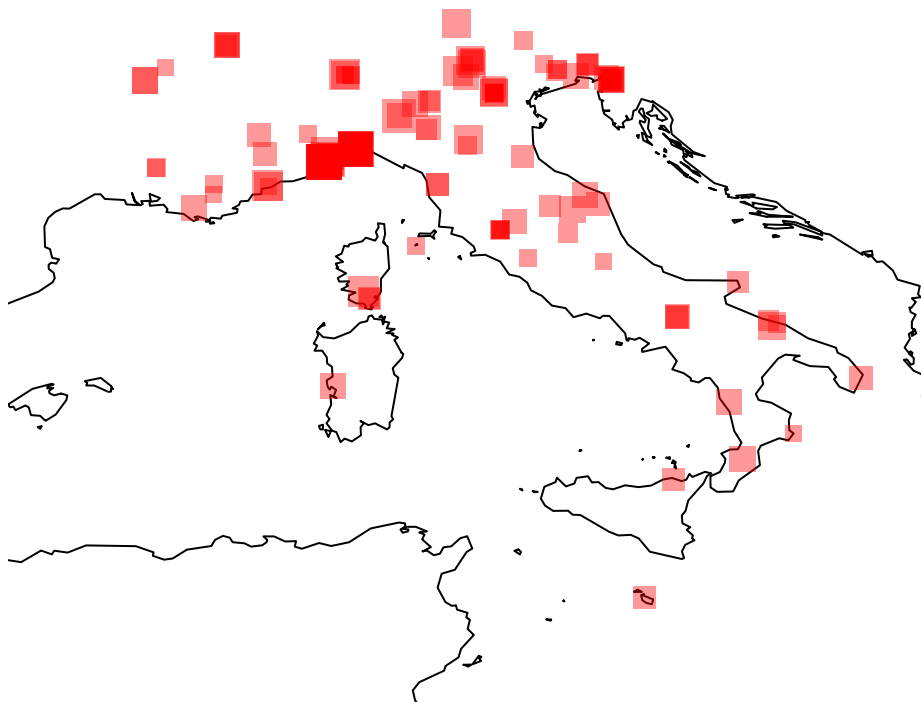

4675 cal. BC

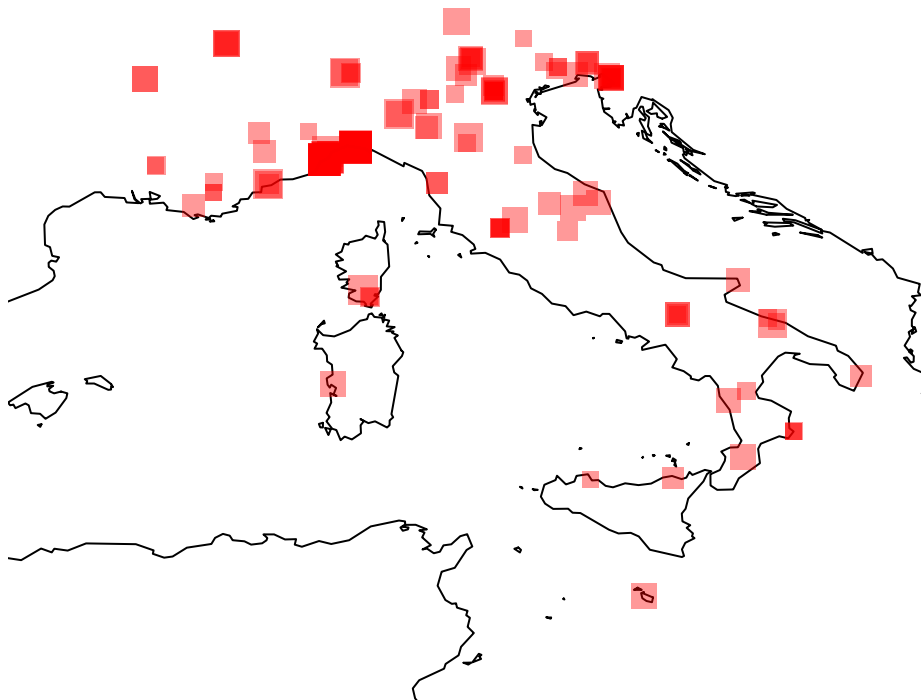

4670 cal. BC

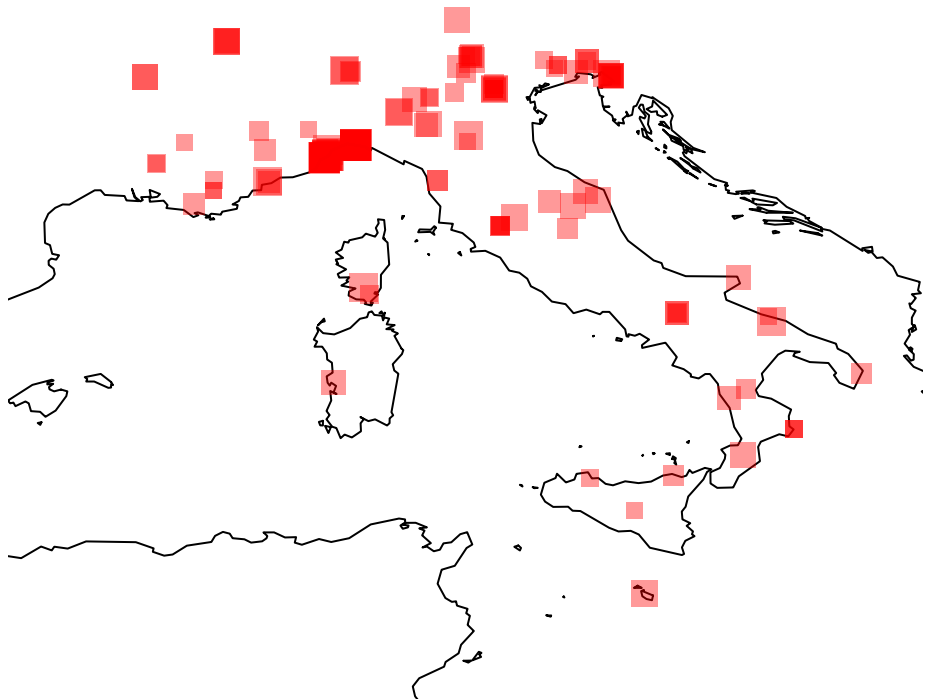

4665 cal. BC

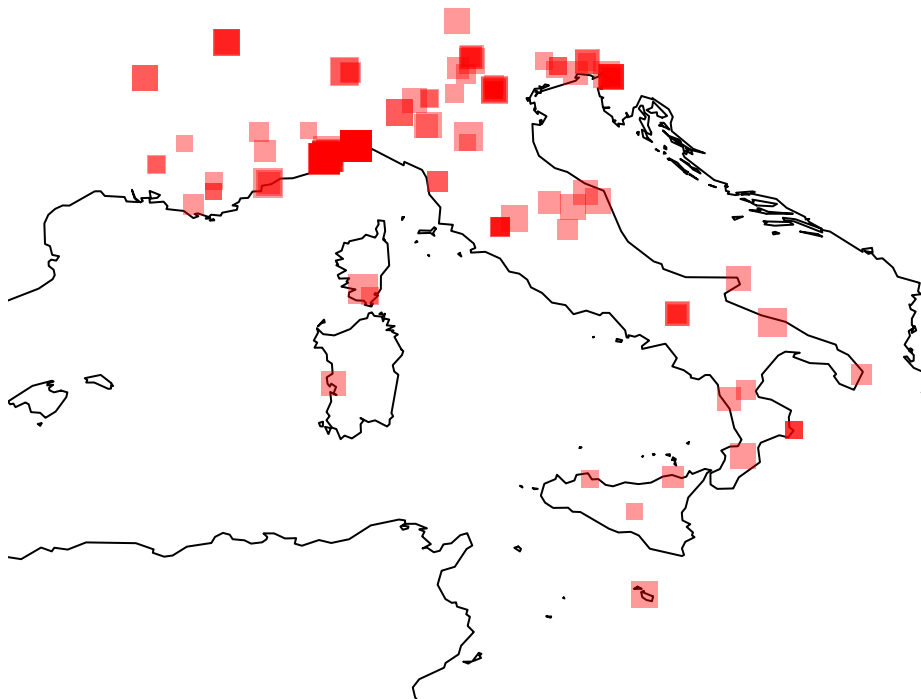

4660 cal. BC

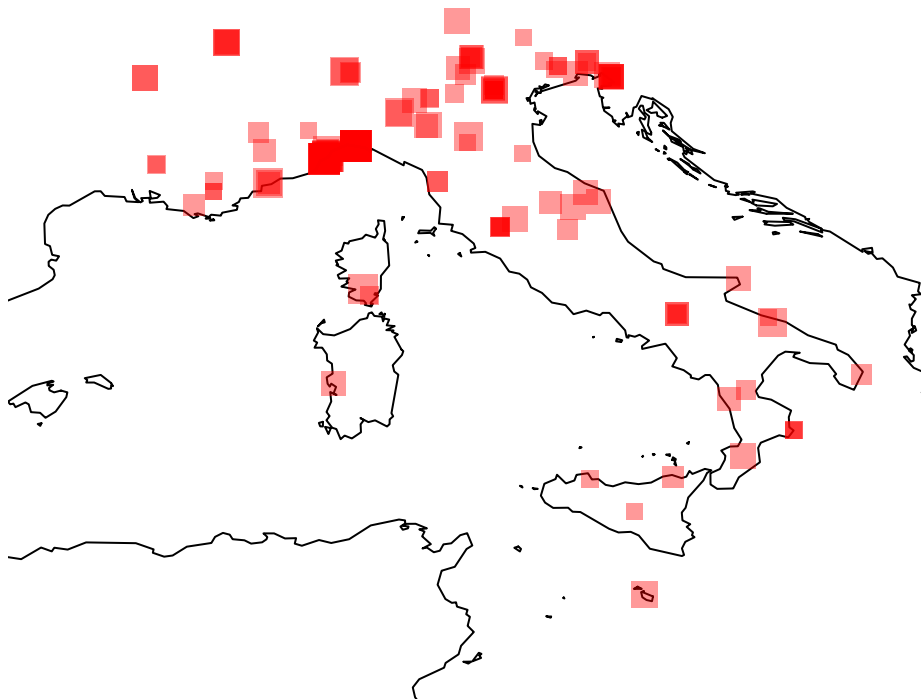

4655 cal. BC

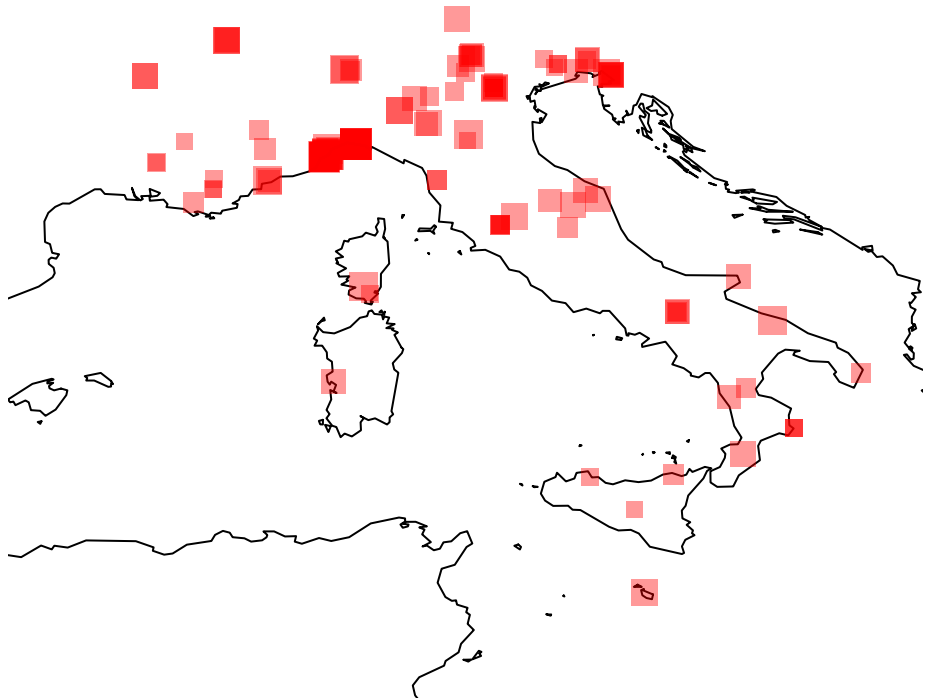

4650 cal. BC

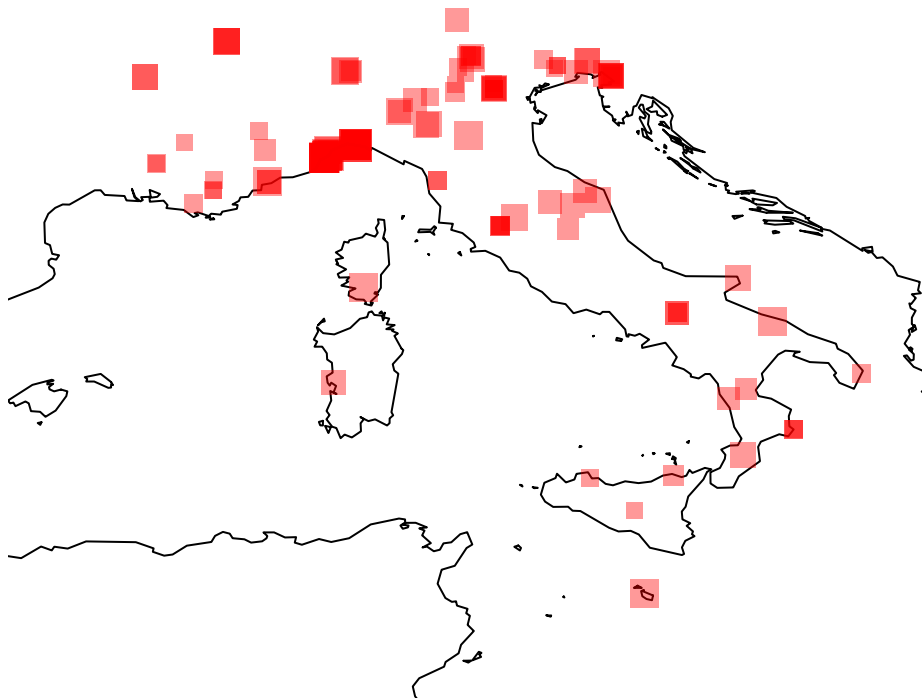



4645 cal. BC

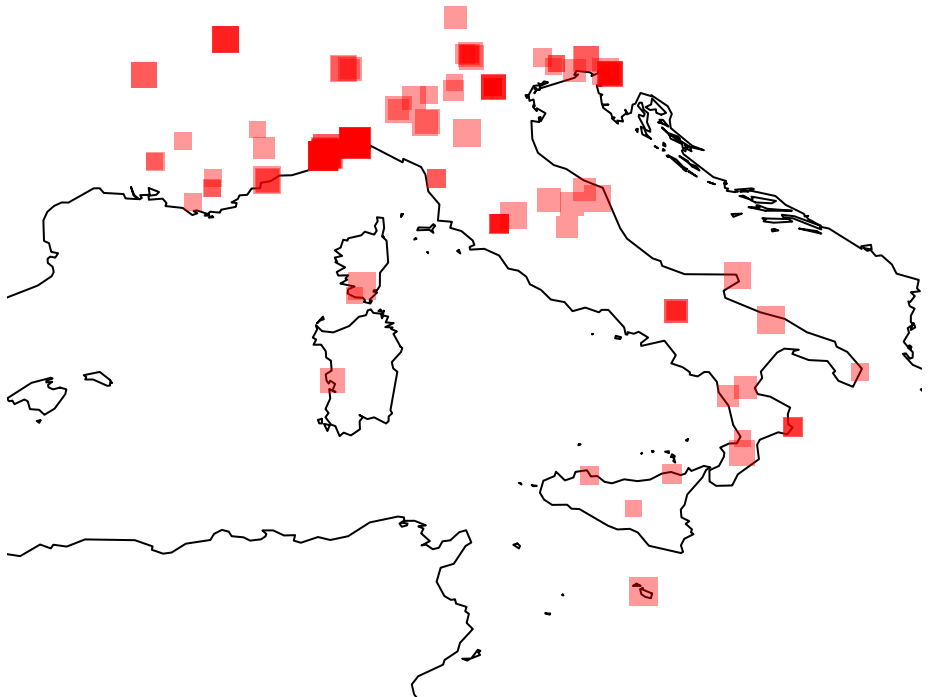

4640 cal. BC

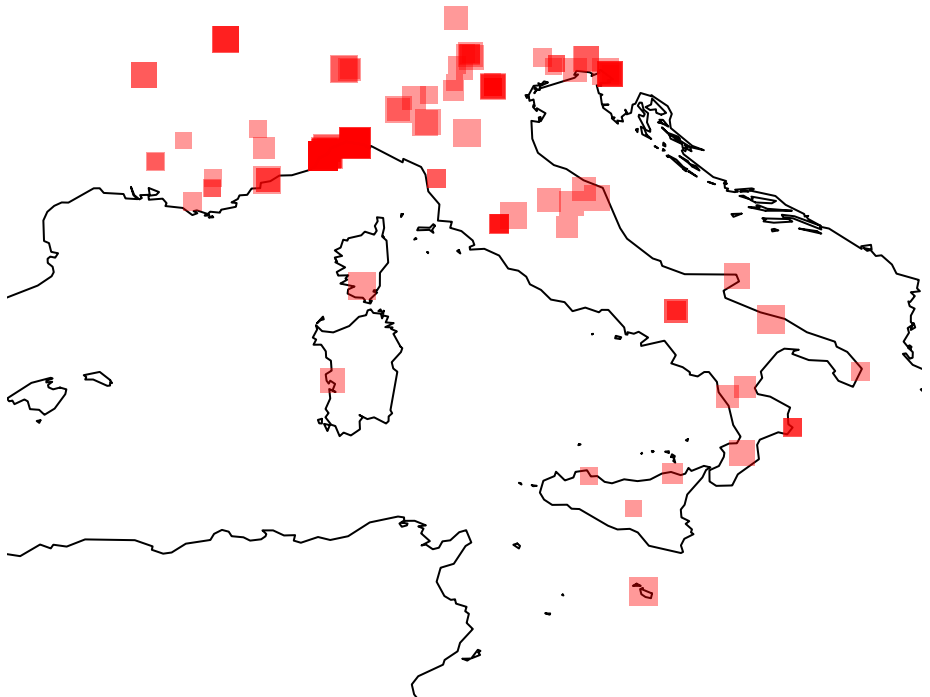

4635 cal. BC

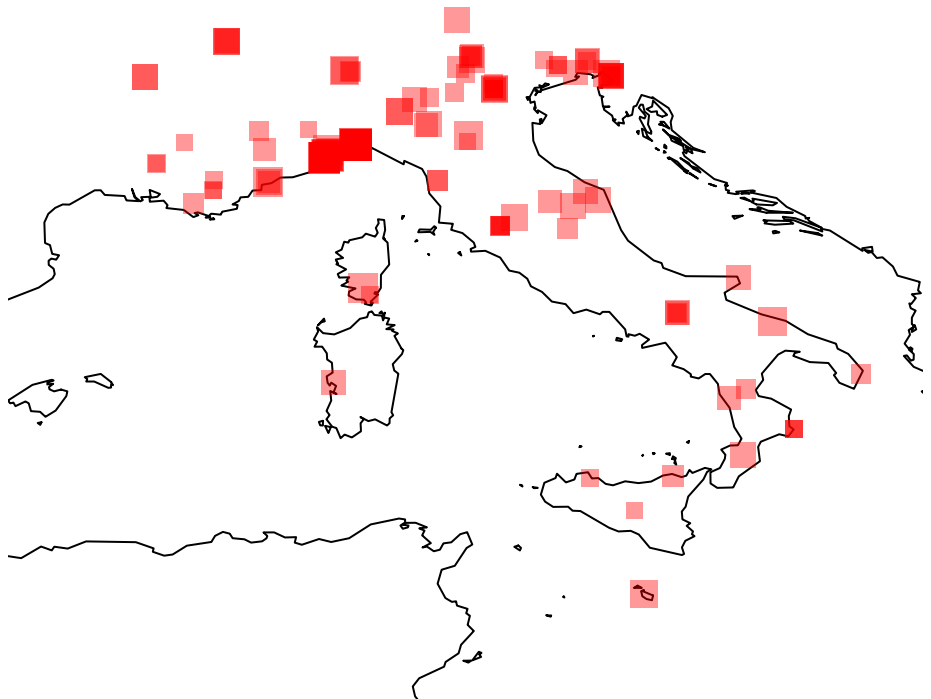

4630 cal. BC

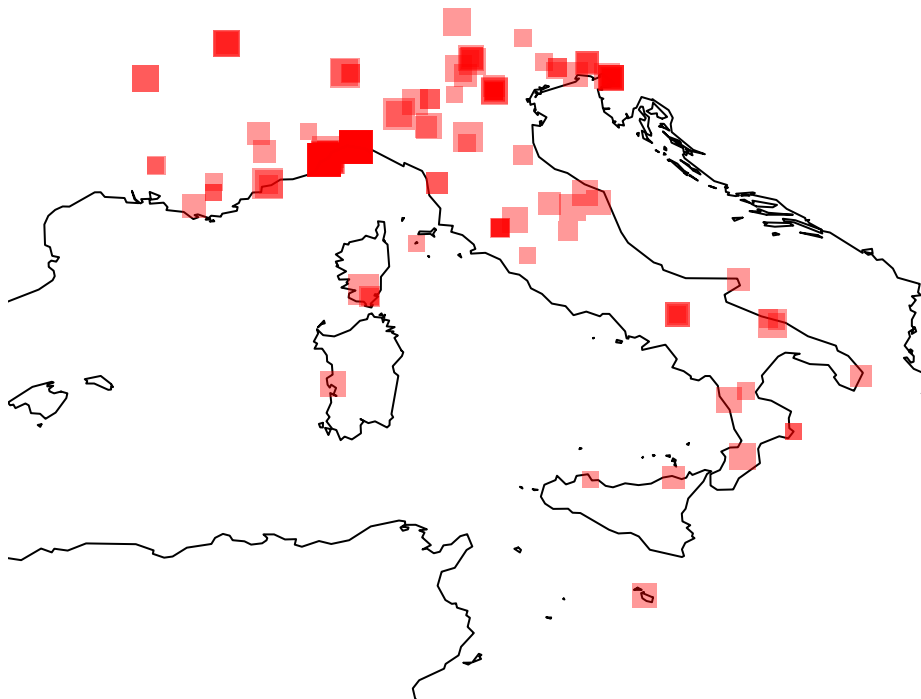

4625 cal. BC

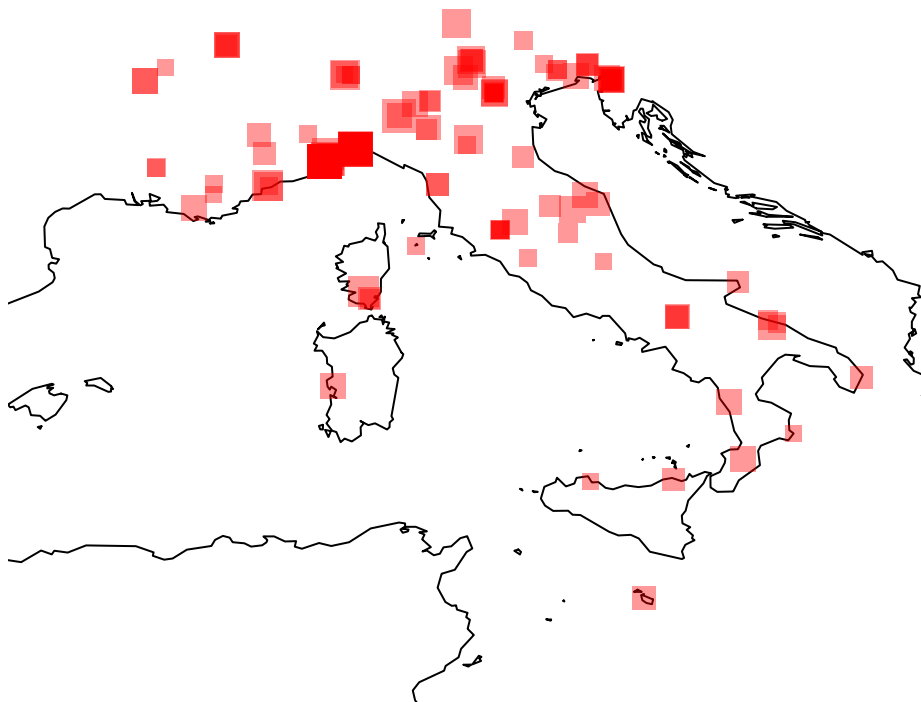

4620 cal. BC

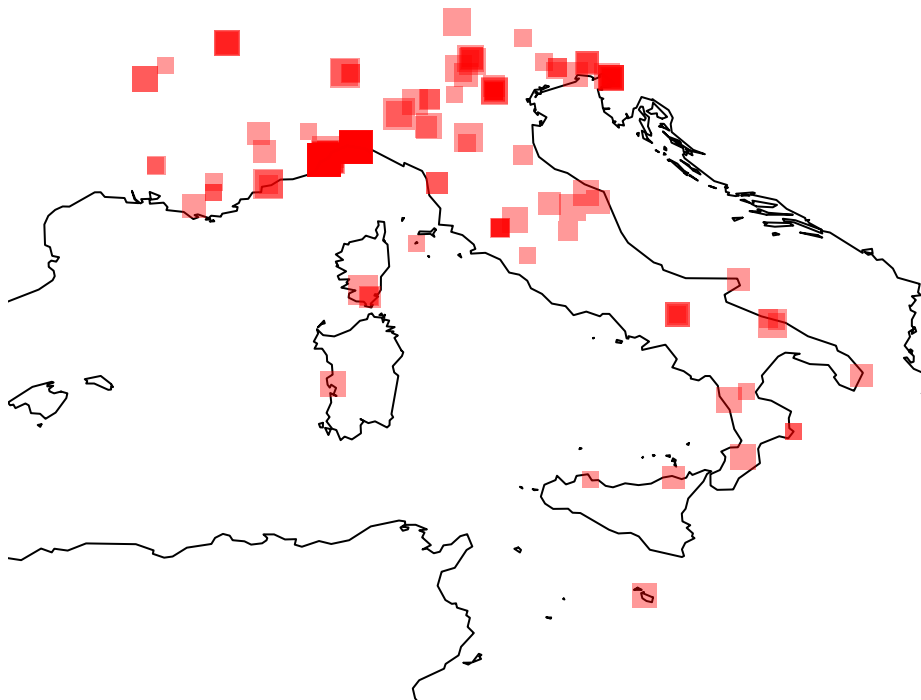

4615 cal. BC

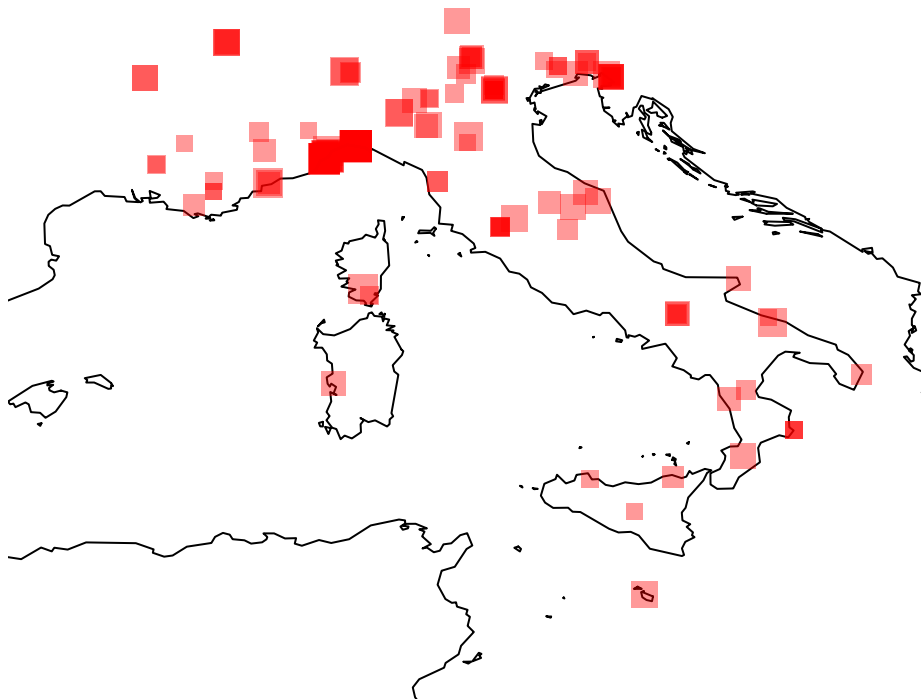

4610 cal. BC

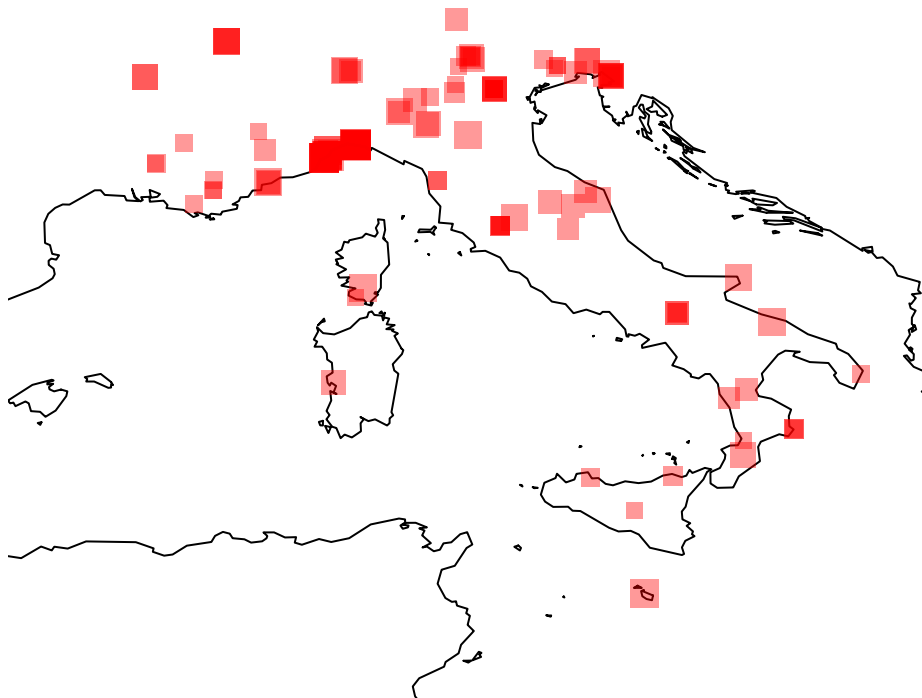



4605 cal. BC

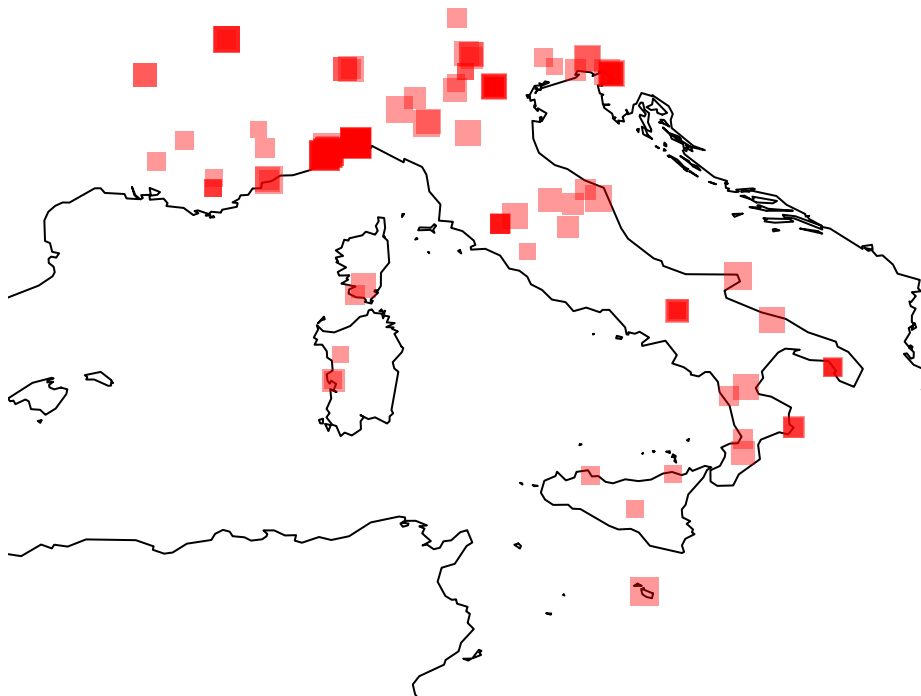

4600 cal. BC

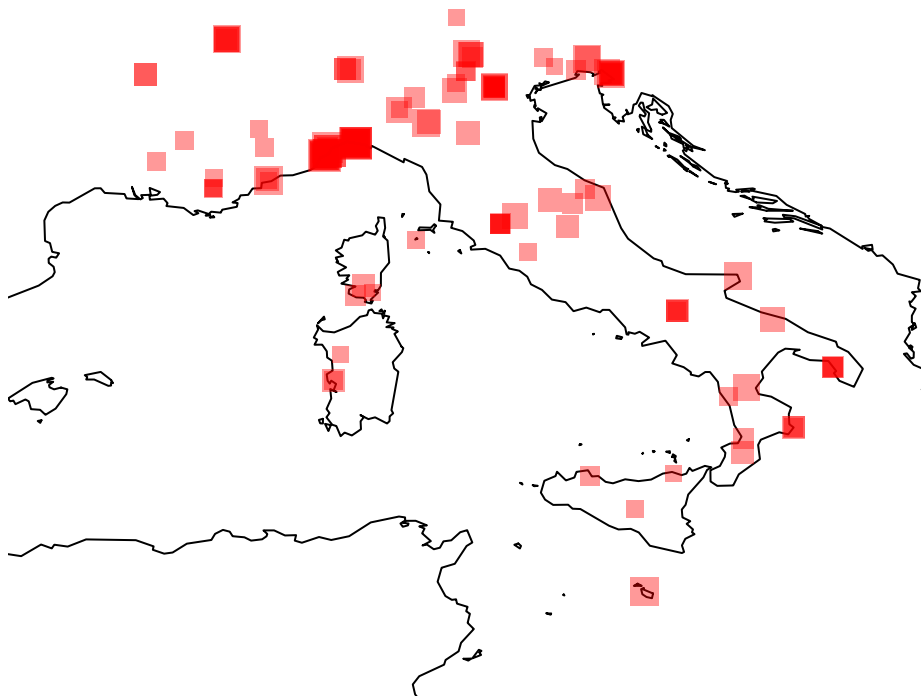

4595 cal. BC

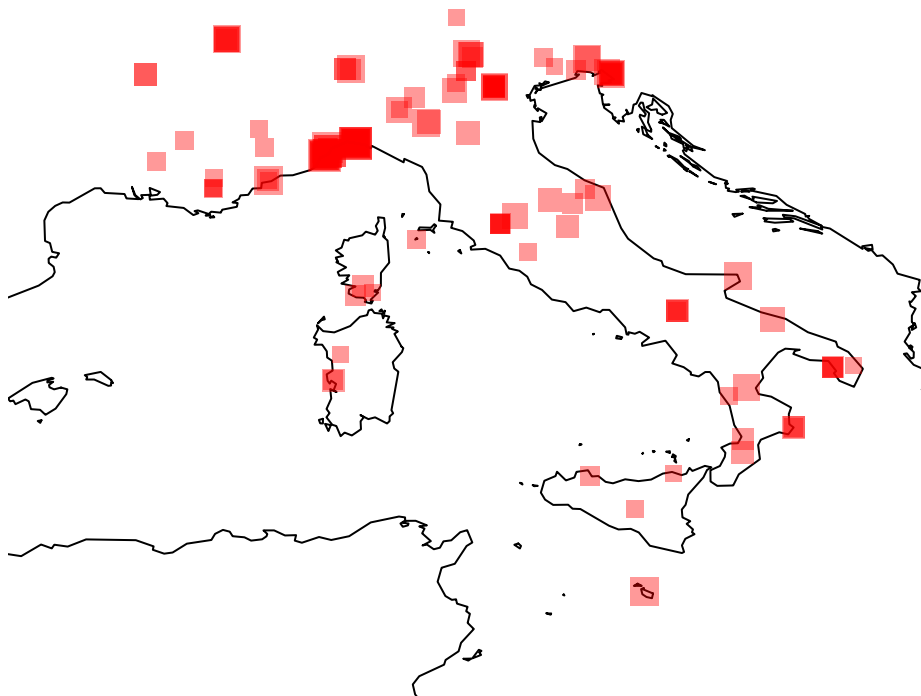

4590 cal. BC



4585 cal. BC

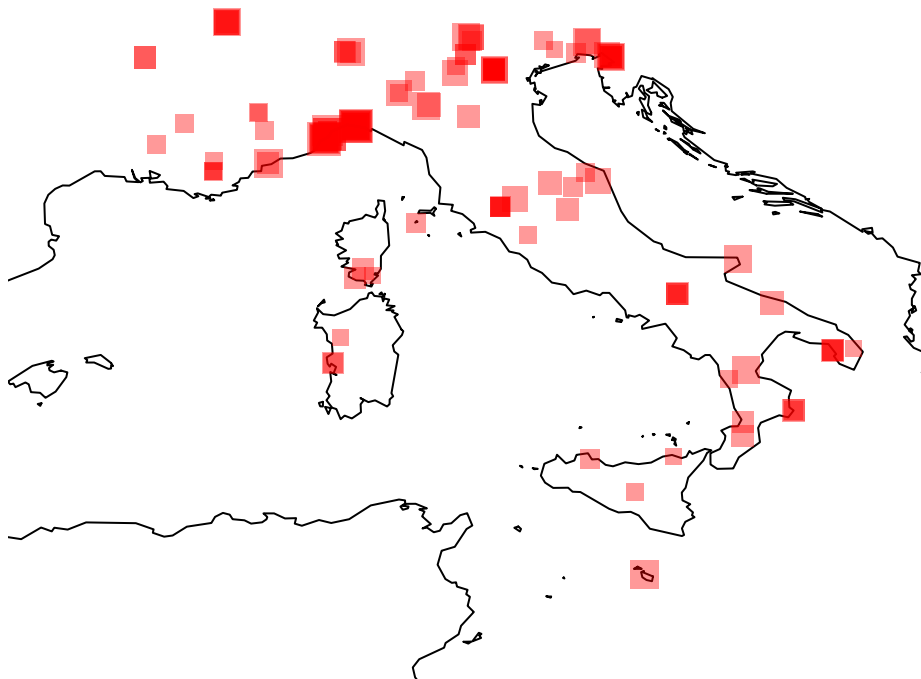

4580 cal. BC

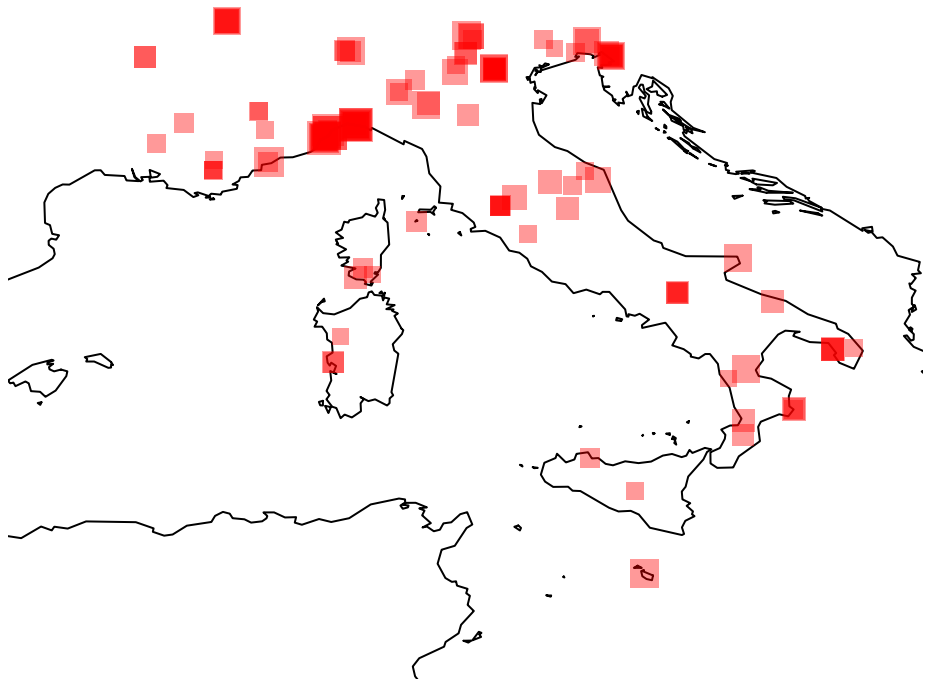

4575 cal. BC

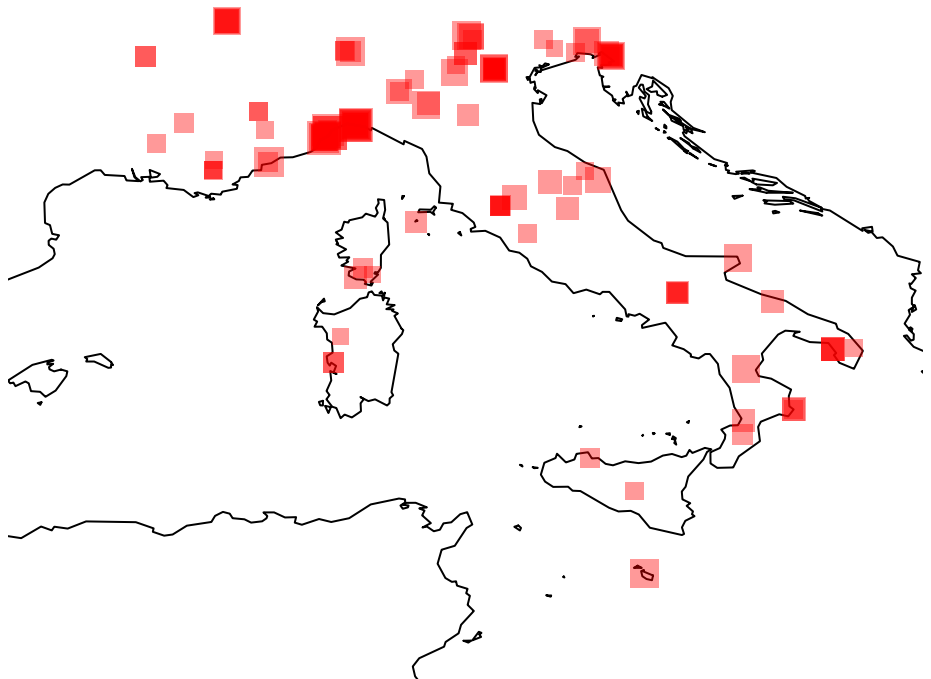

4570 cal. BC

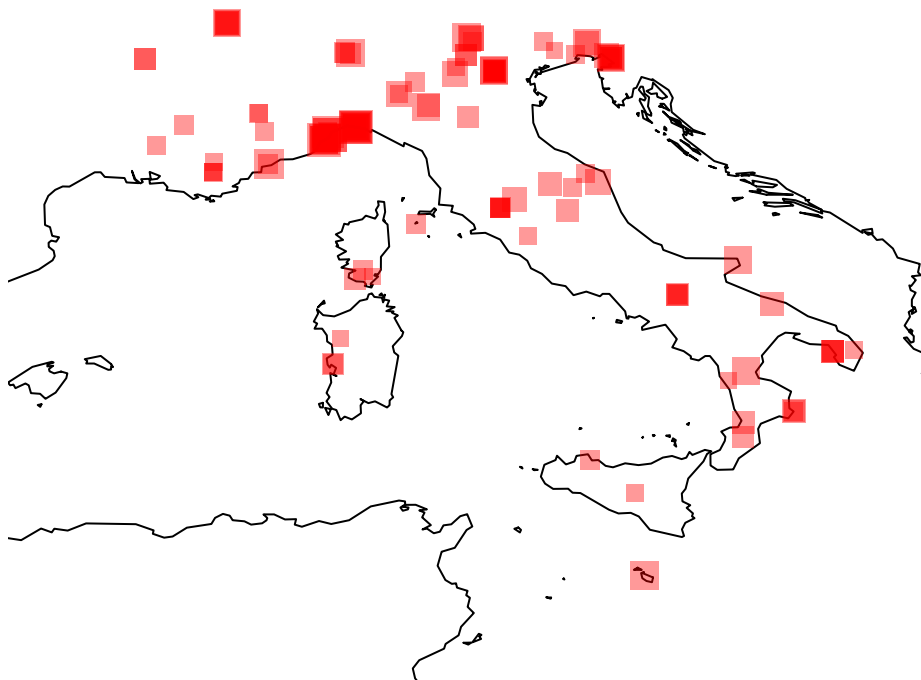



4565 cal. BC

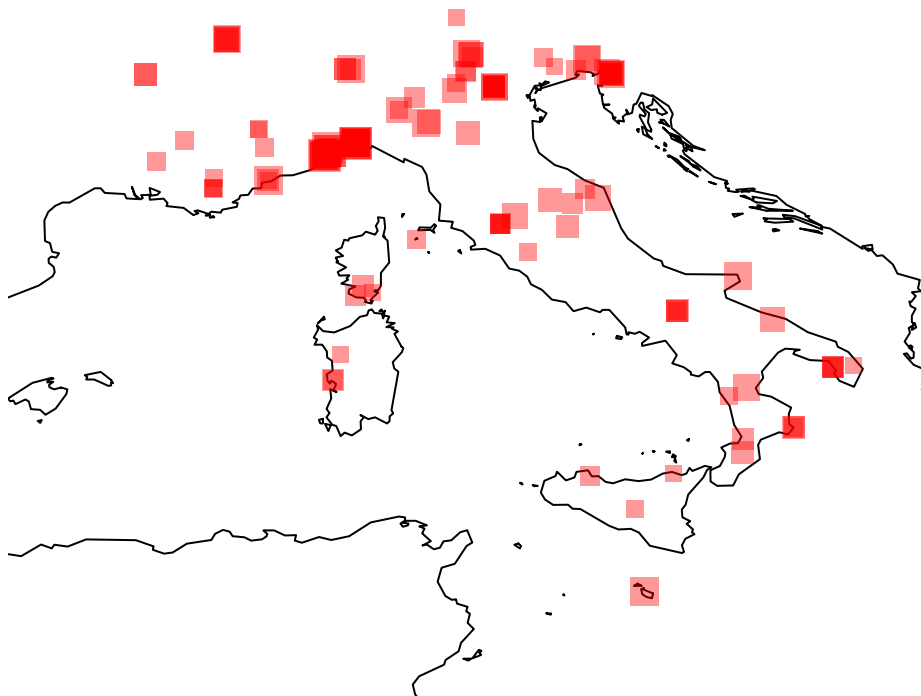

4560 cal. BC

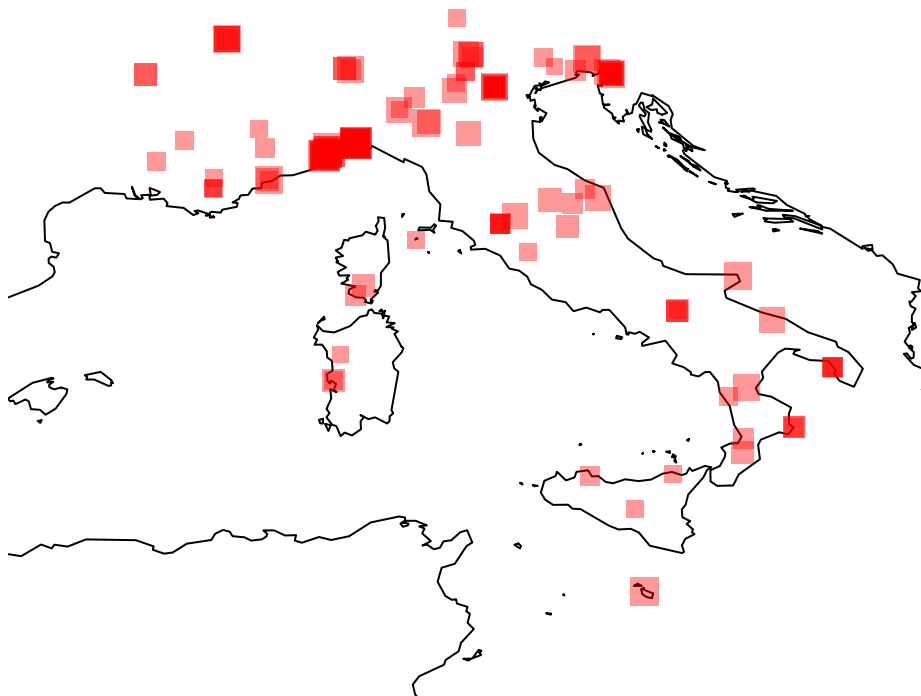

4555 cal. BC

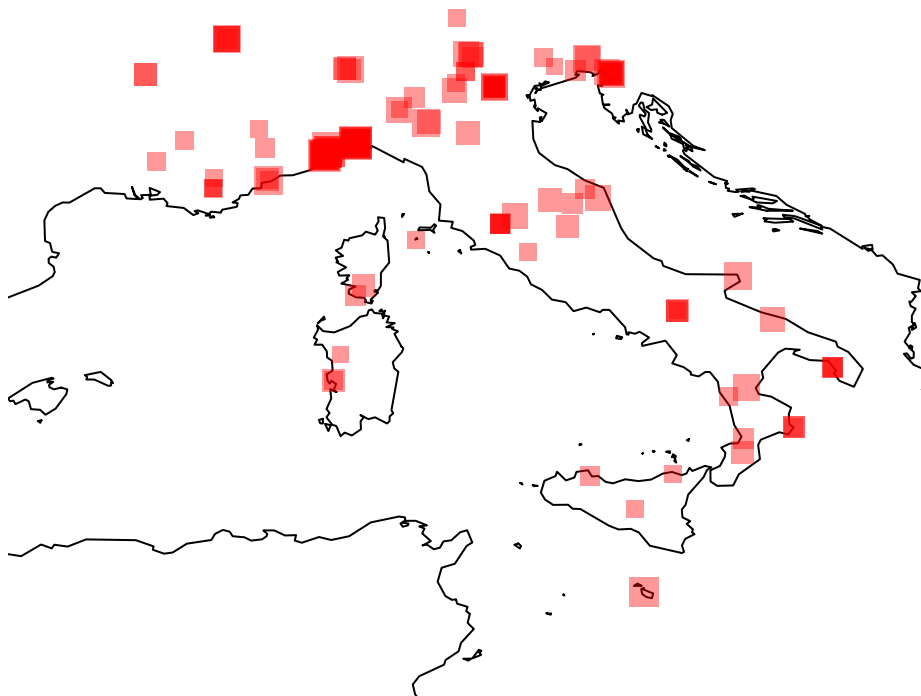

4550 cal. BC

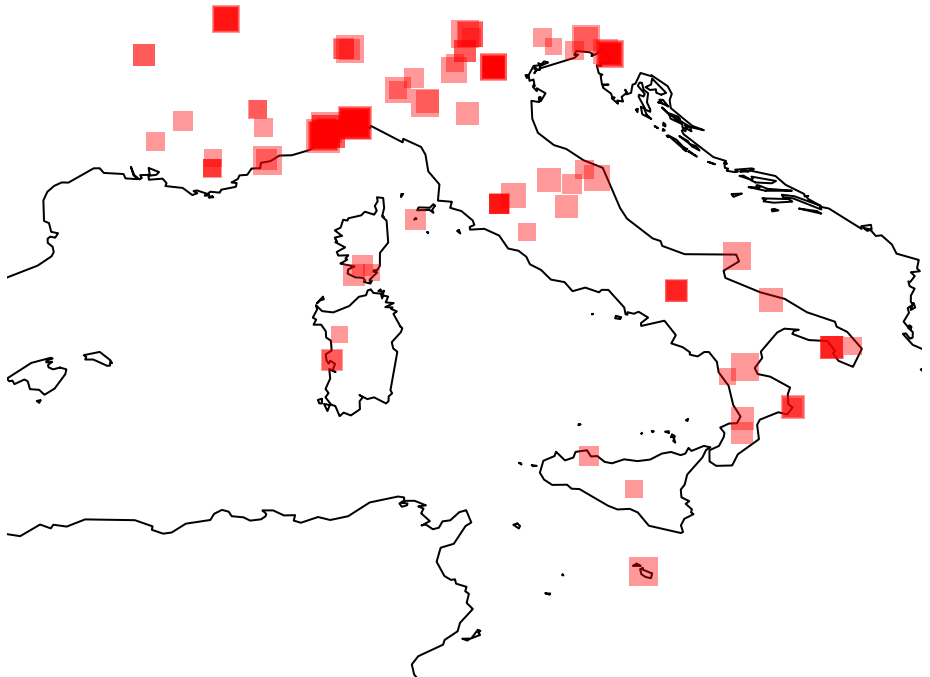

4545 cal. BC

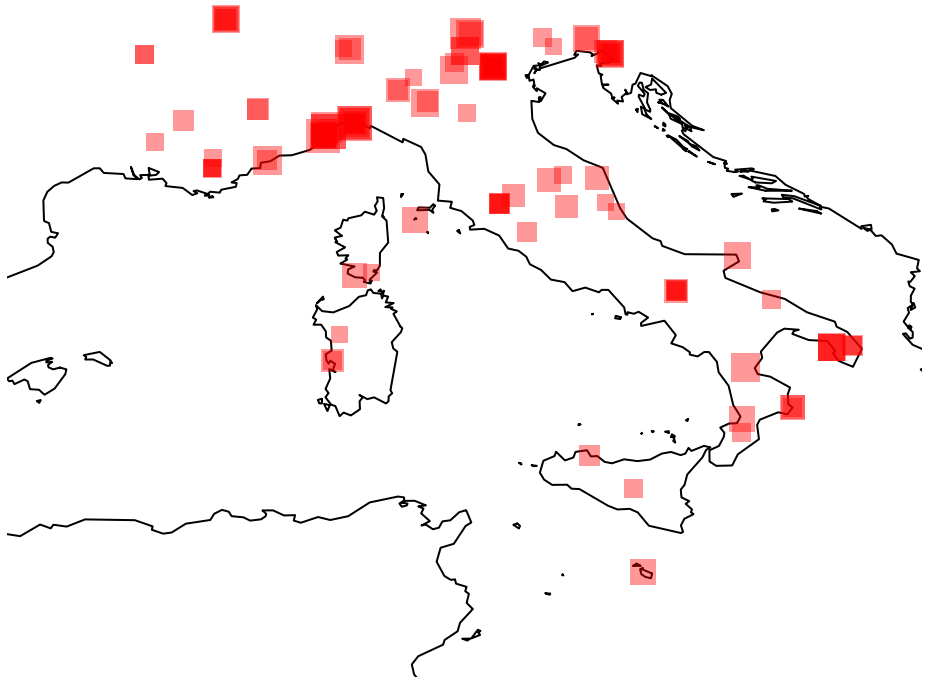

4540 cal. BC

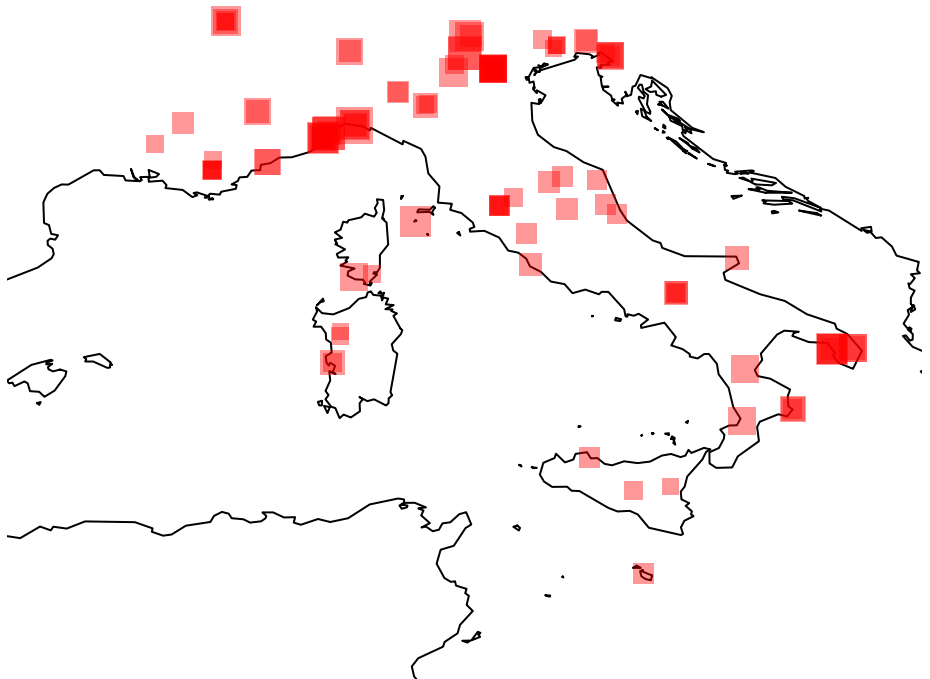

4535 cal. BC

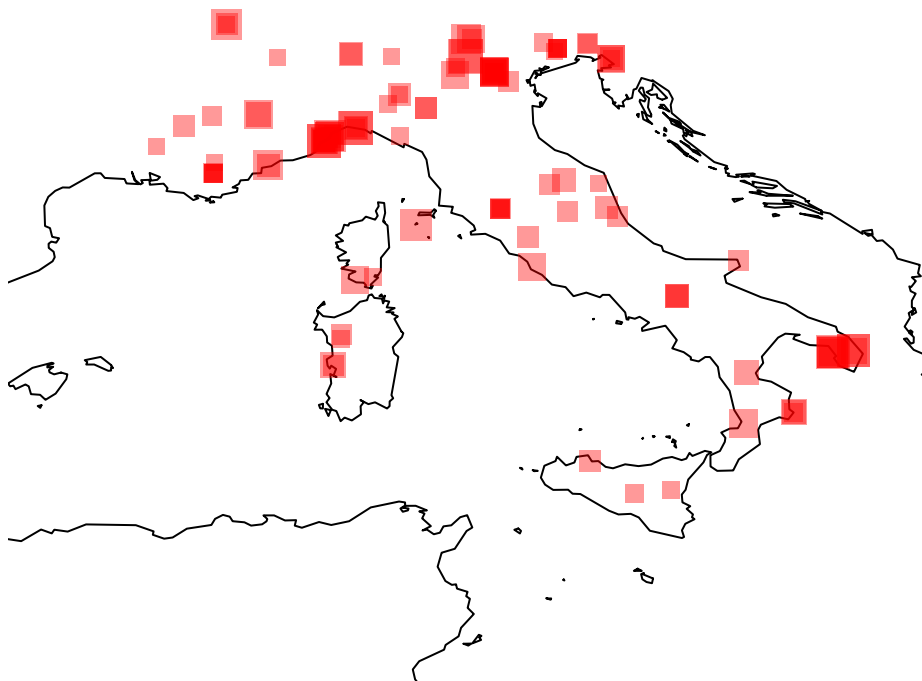

4530 cal. BC

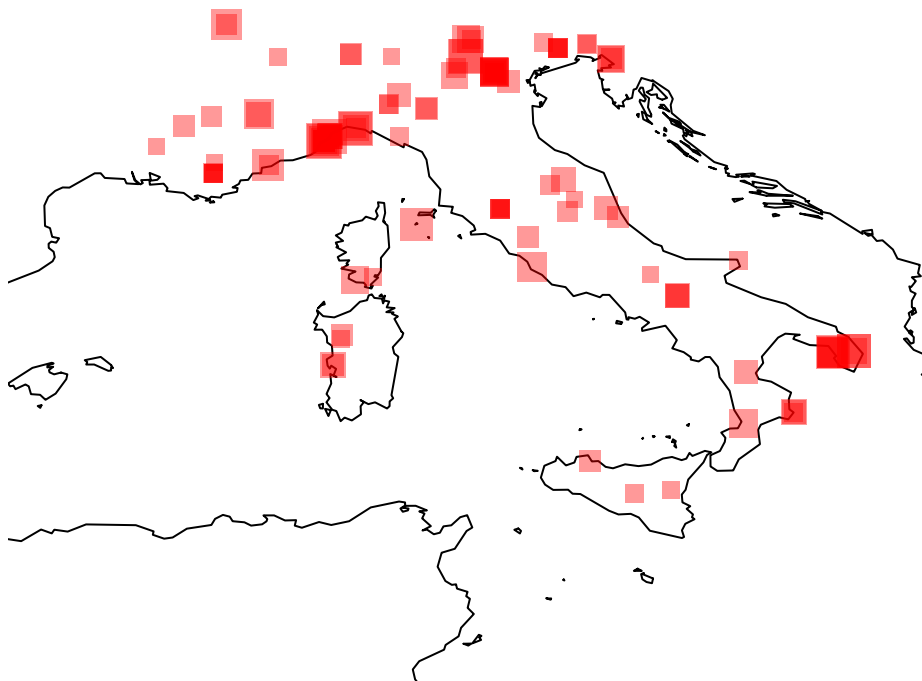



4525 cal. BC



4520 cal. BC

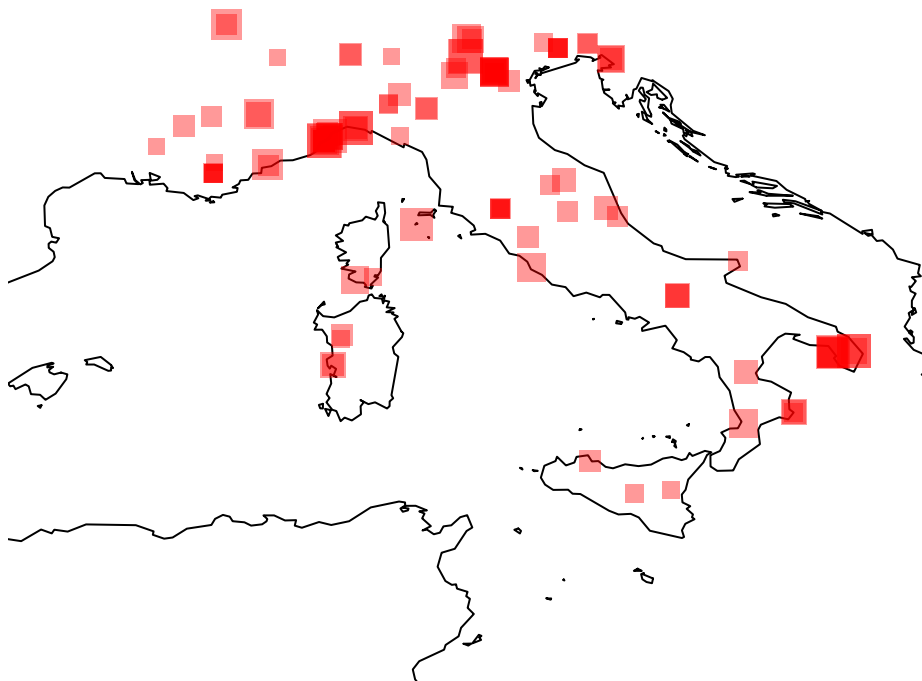

4515 cal. BC

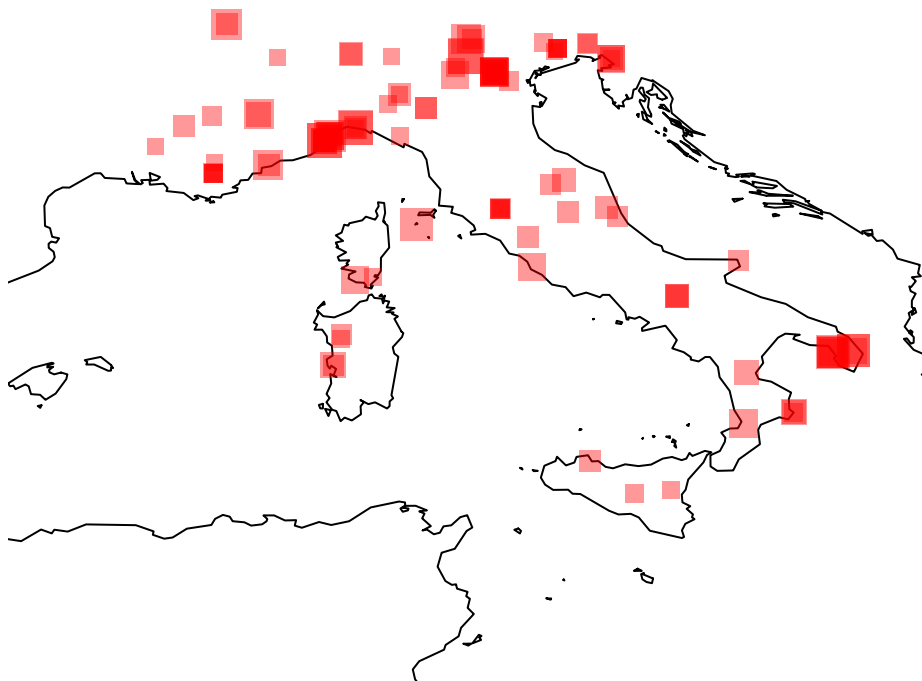

4510 cal. BC

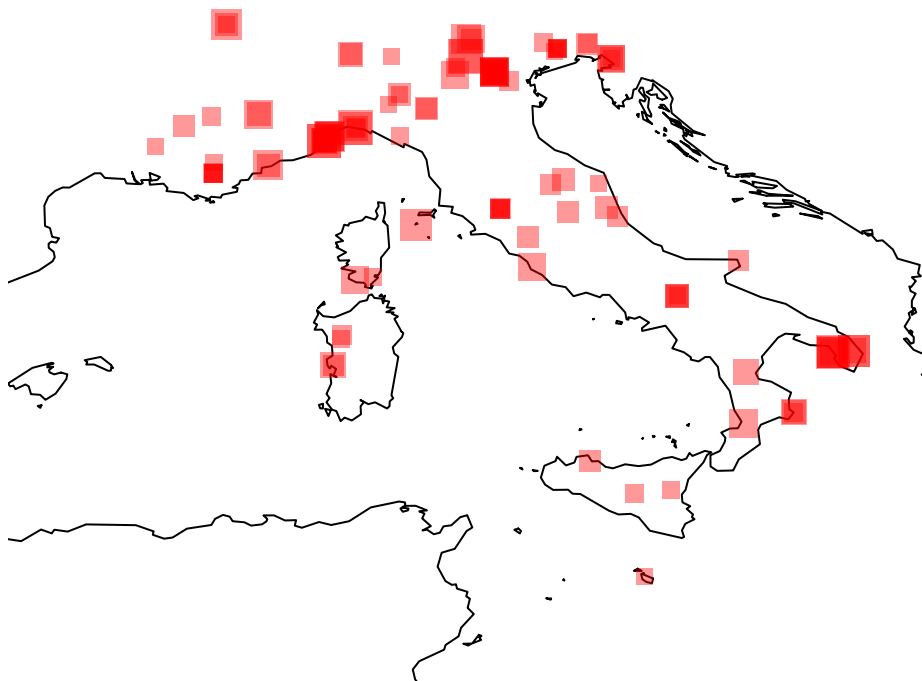

4505 cal. BC

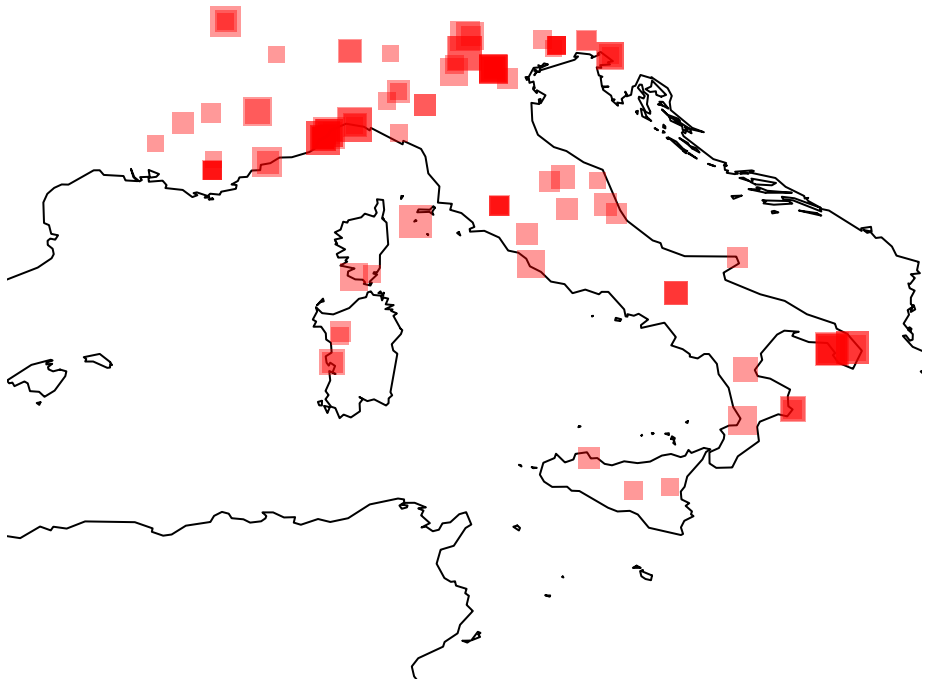

4500 cal. BC

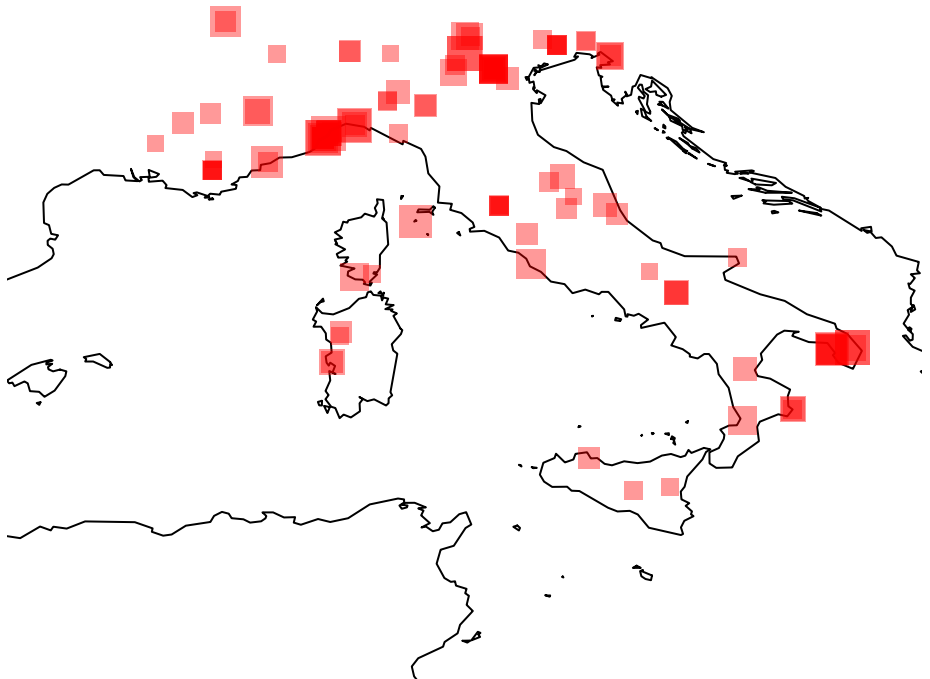

4495 cal. BC

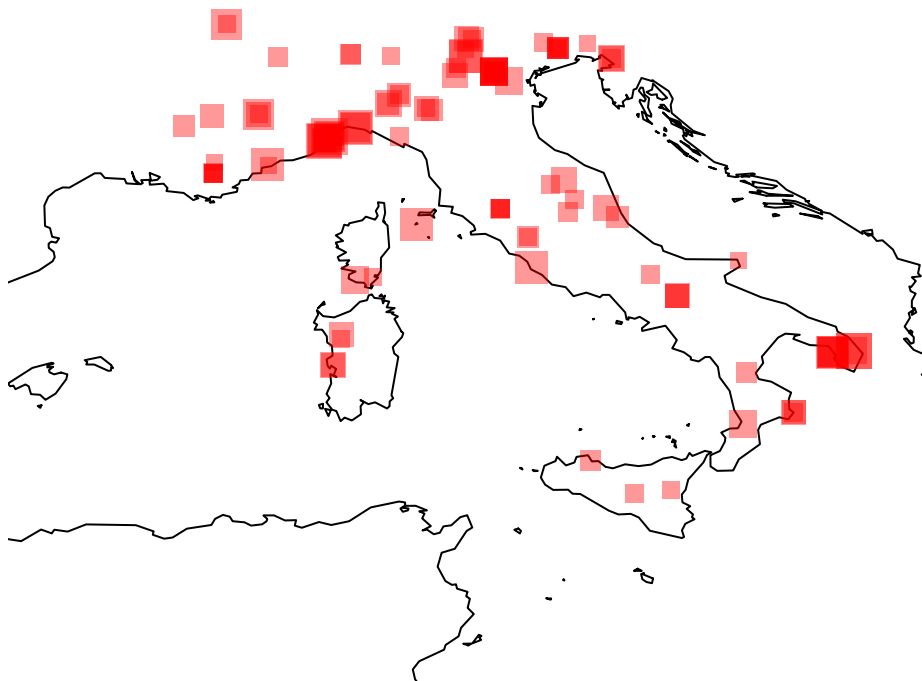

4490 cal. BC

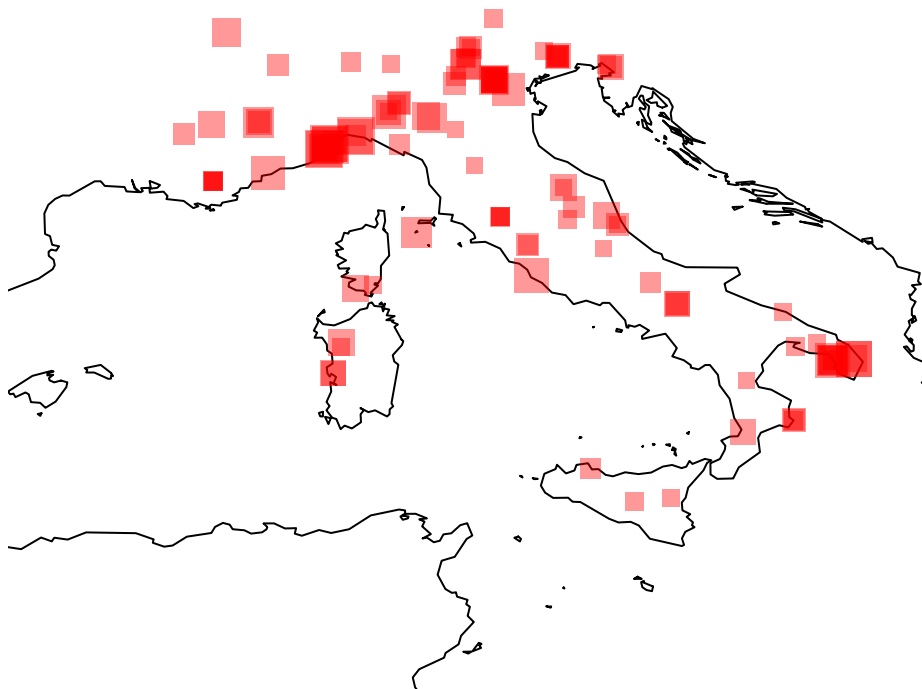



4485 cal. BC

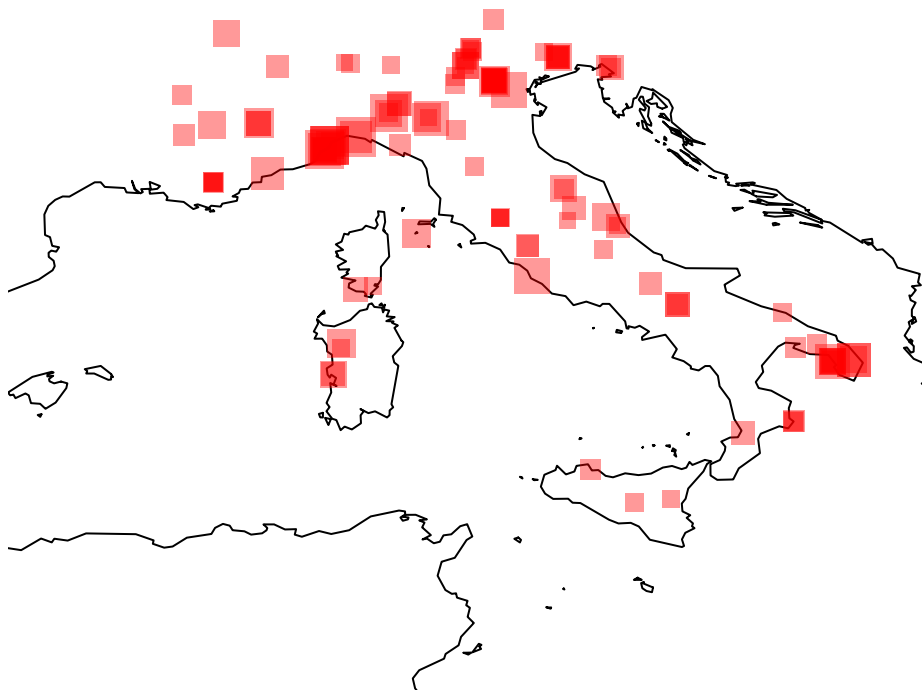

4480 cal. BC

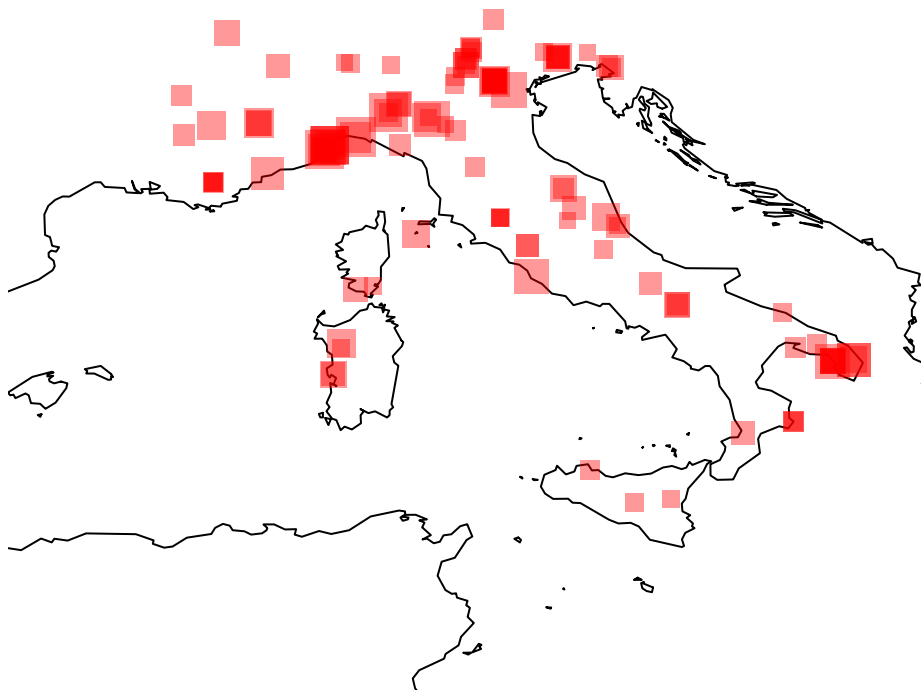

4475 cal. BC

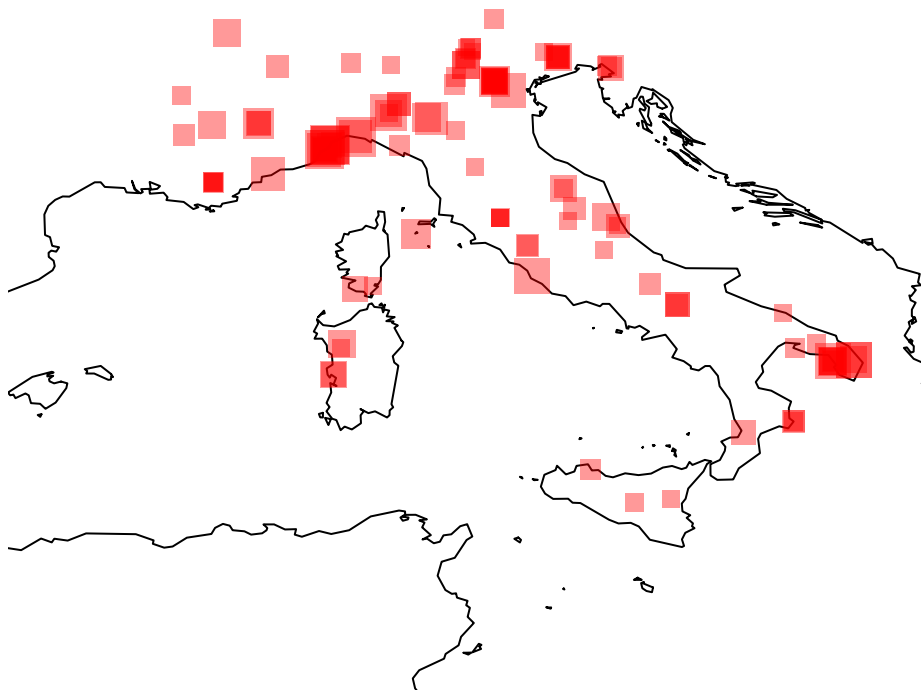

4470 cal. BC

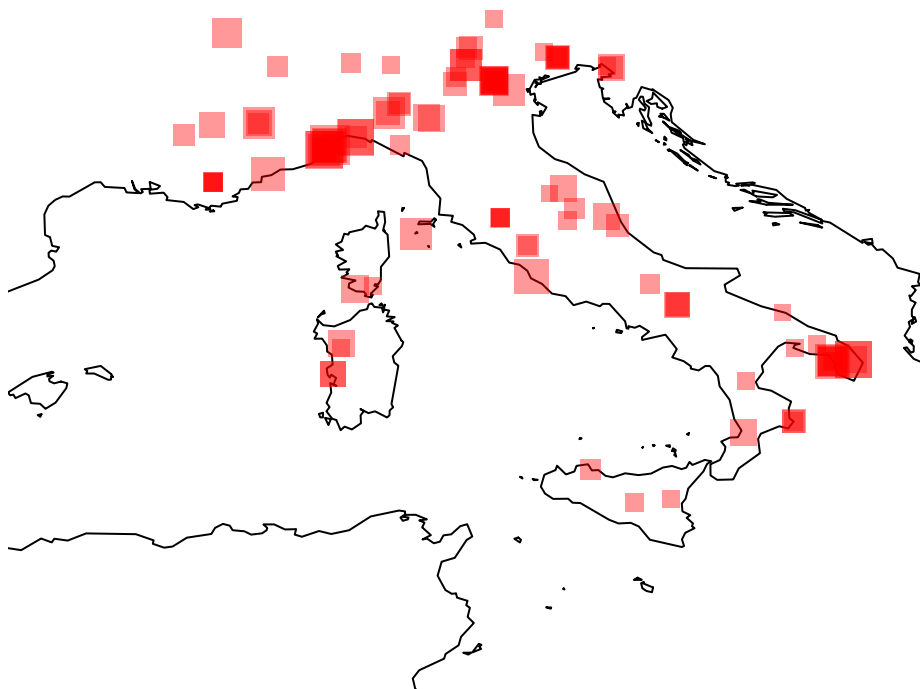

4465 cal. BC

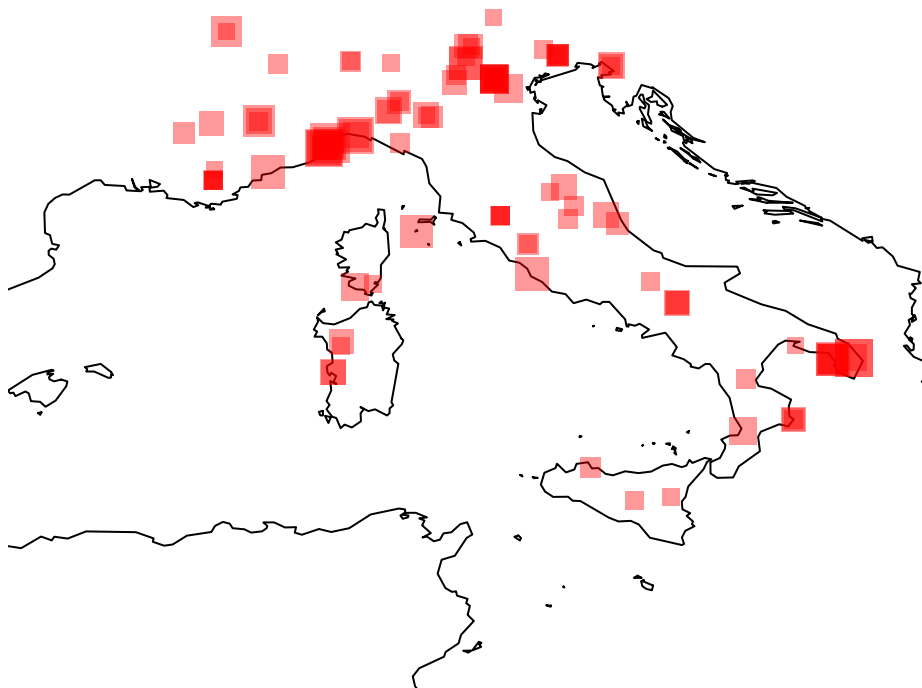

4460 cal. BC

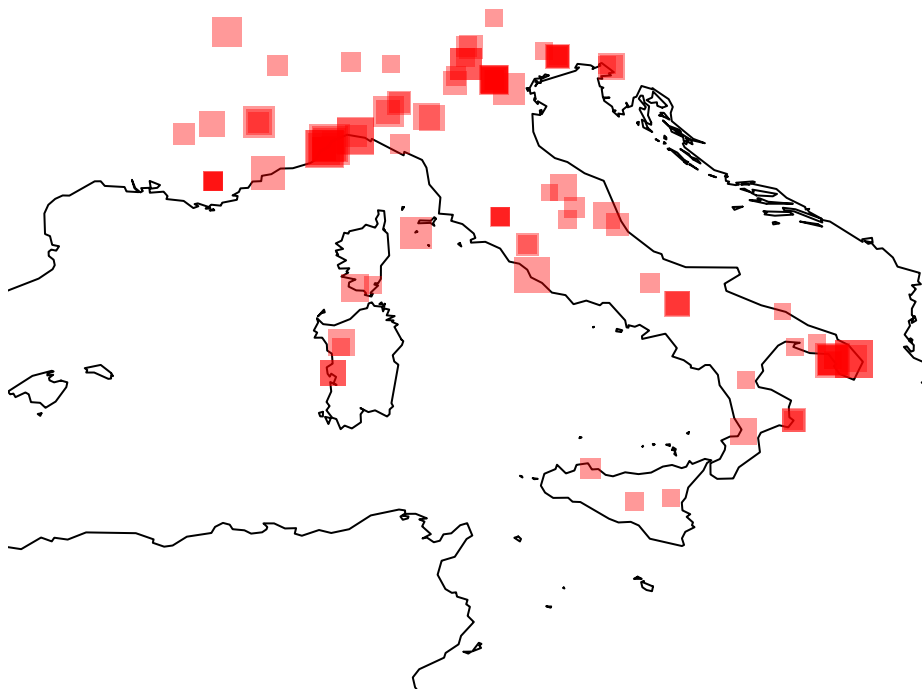

4455 cal. BC

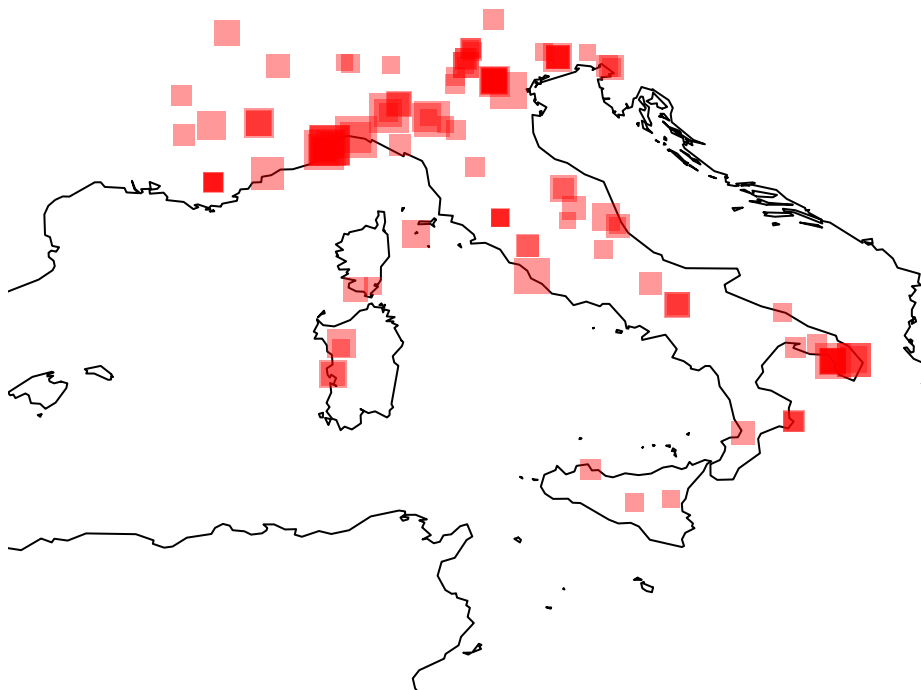

4450 cal. BC

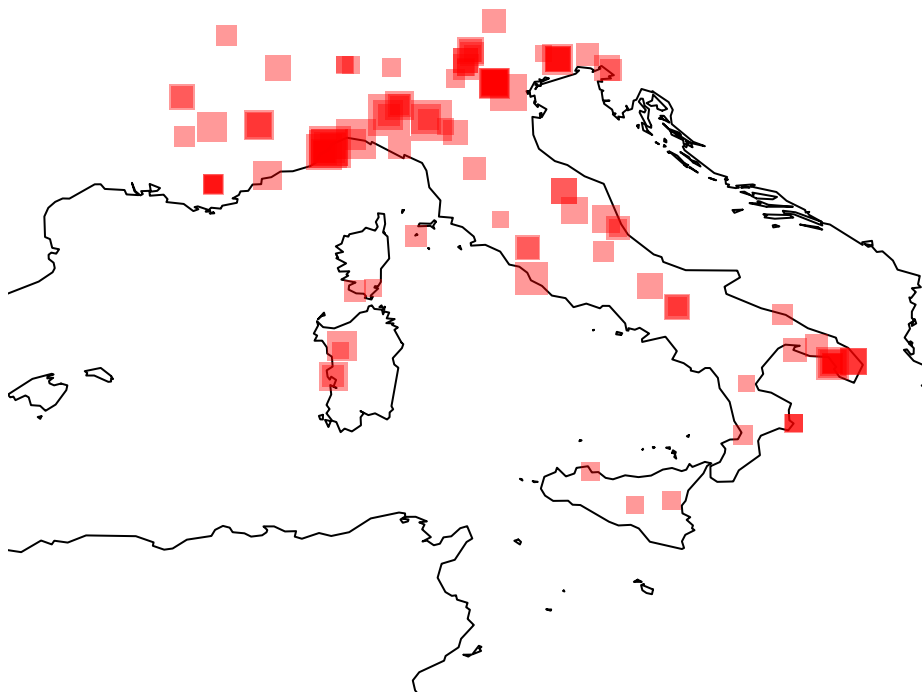



4445 cal. BC

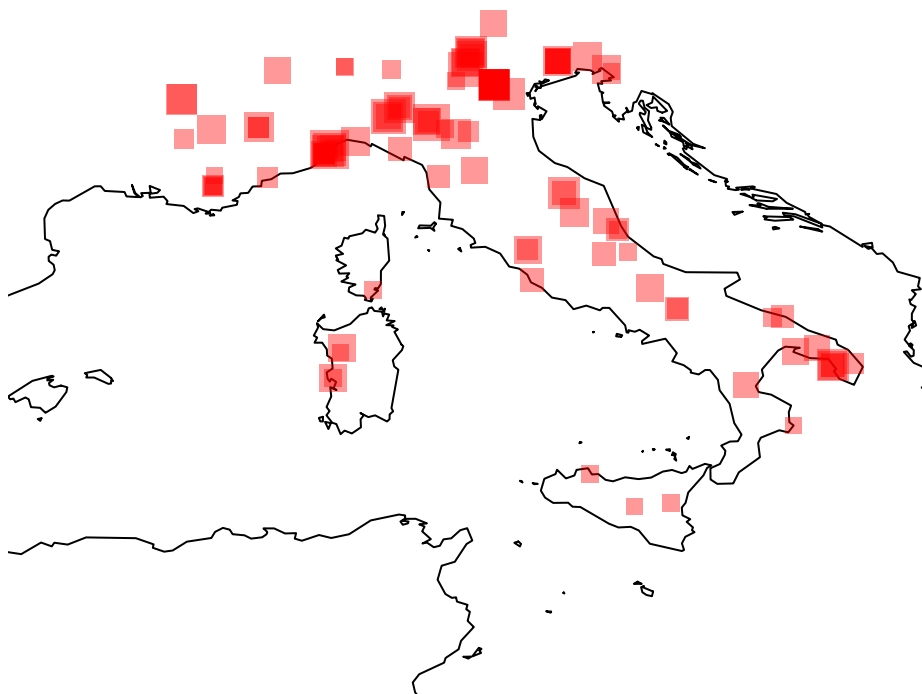

4440 cal. BC

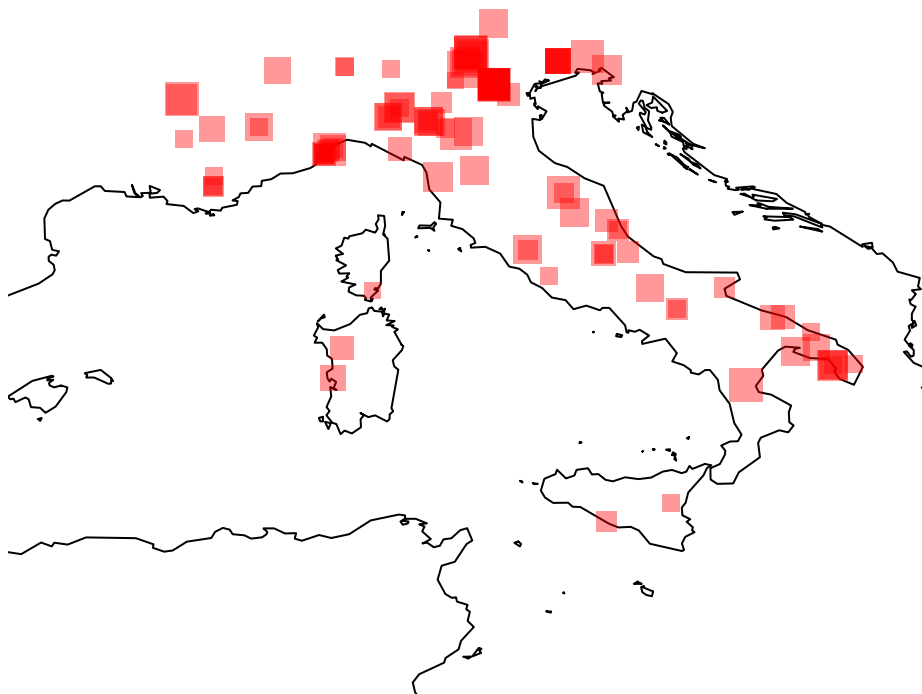

4435 cal. BC

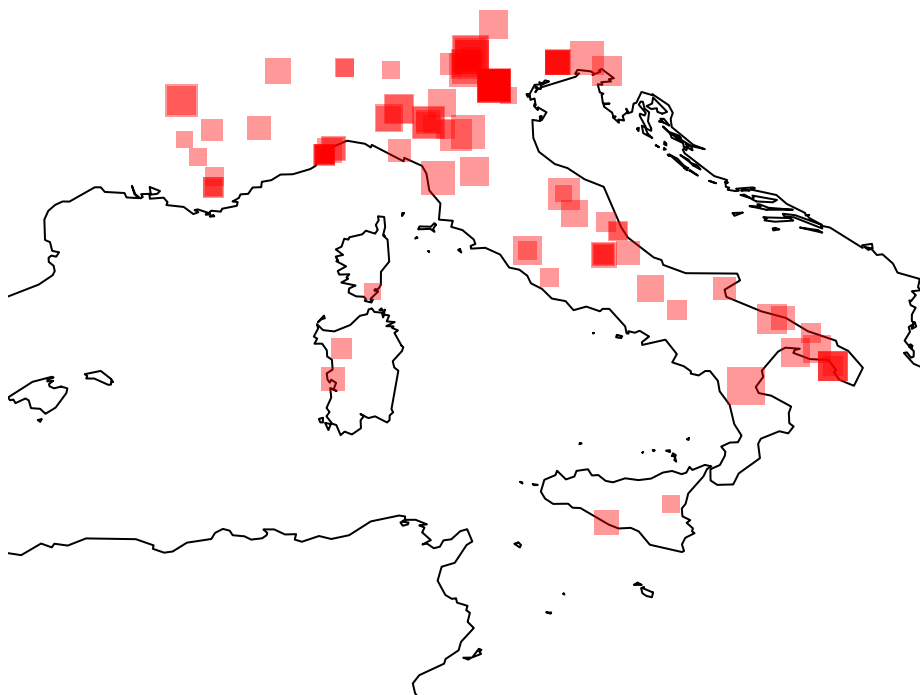

4430 cal. BC

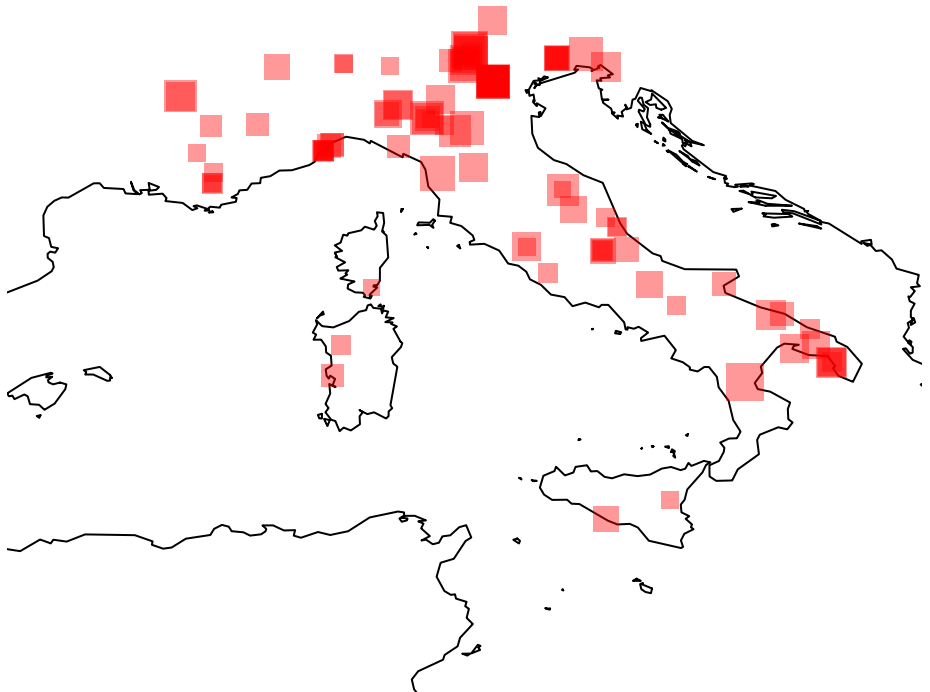

4425 cal. BC

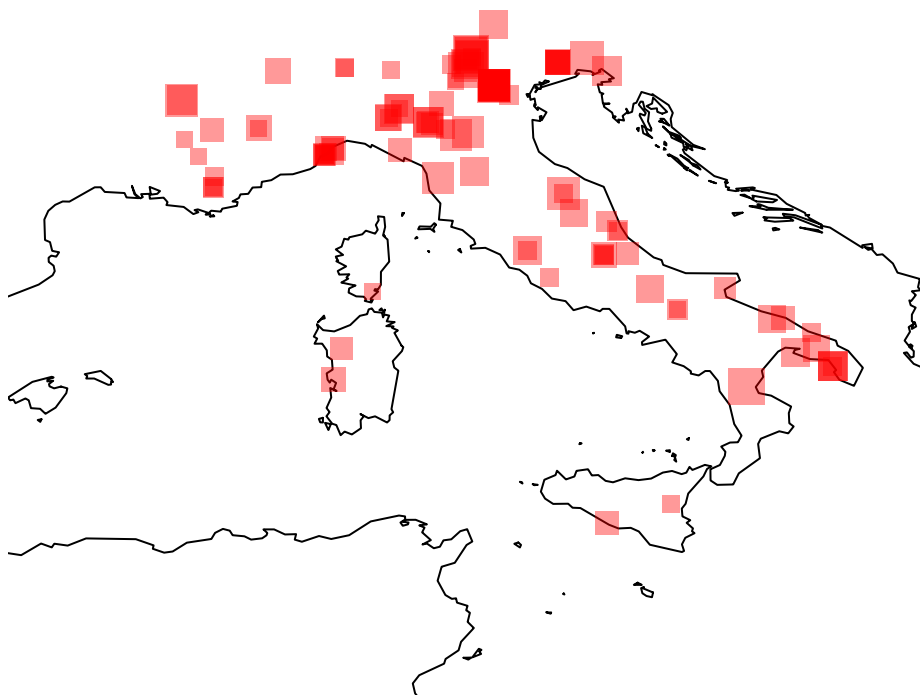

4420 cal. BC

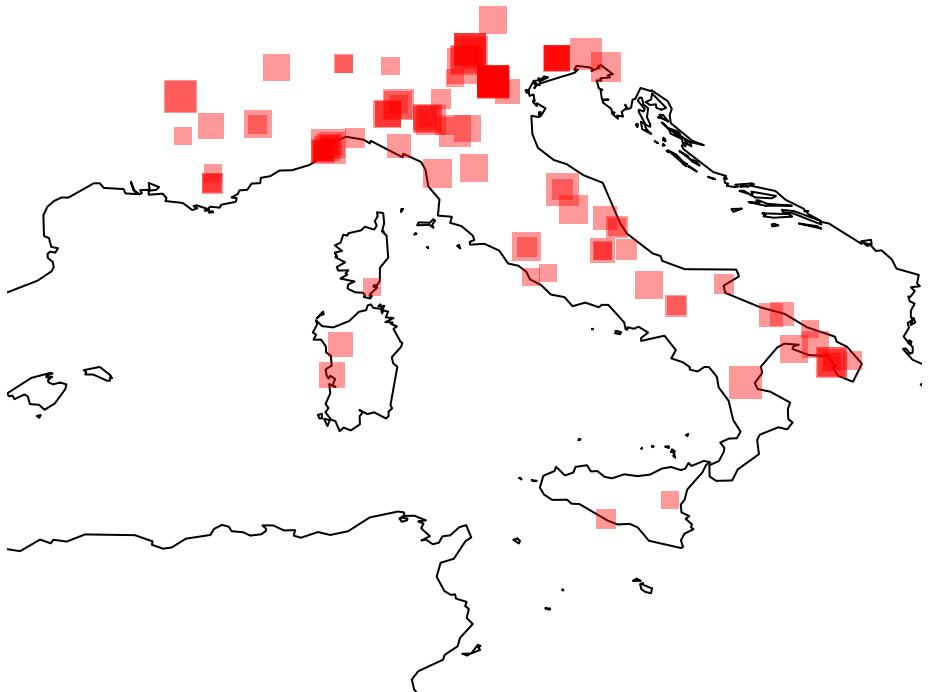

4415 cal. BC

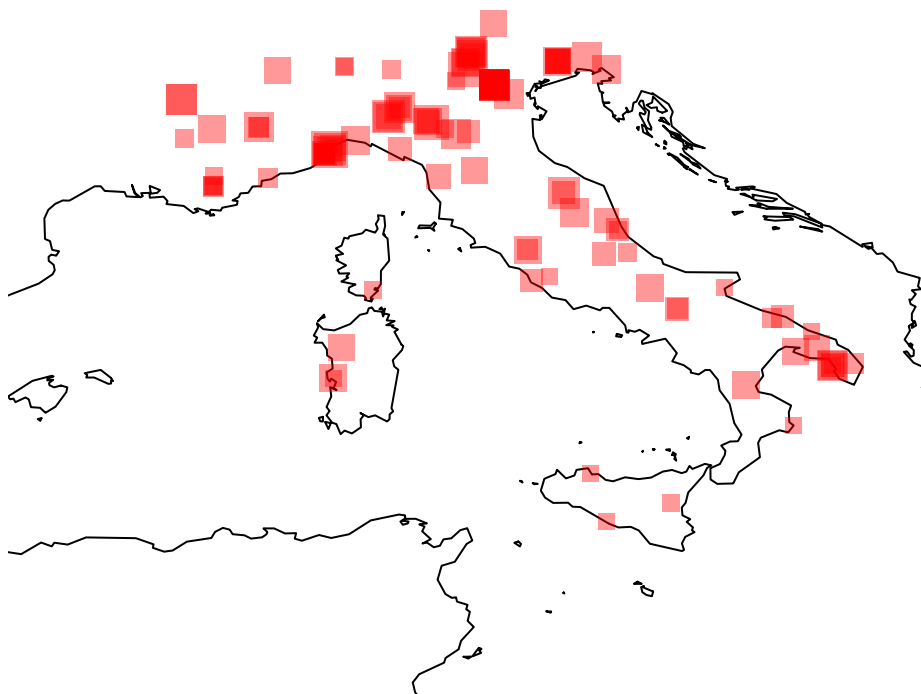

4410 cal. BC

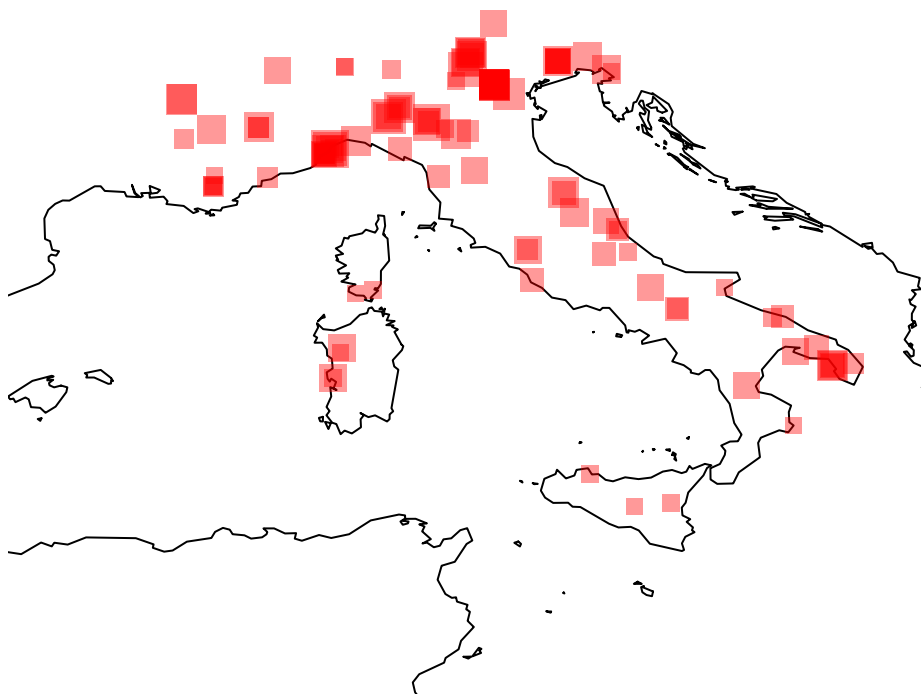



4405 cal. BC

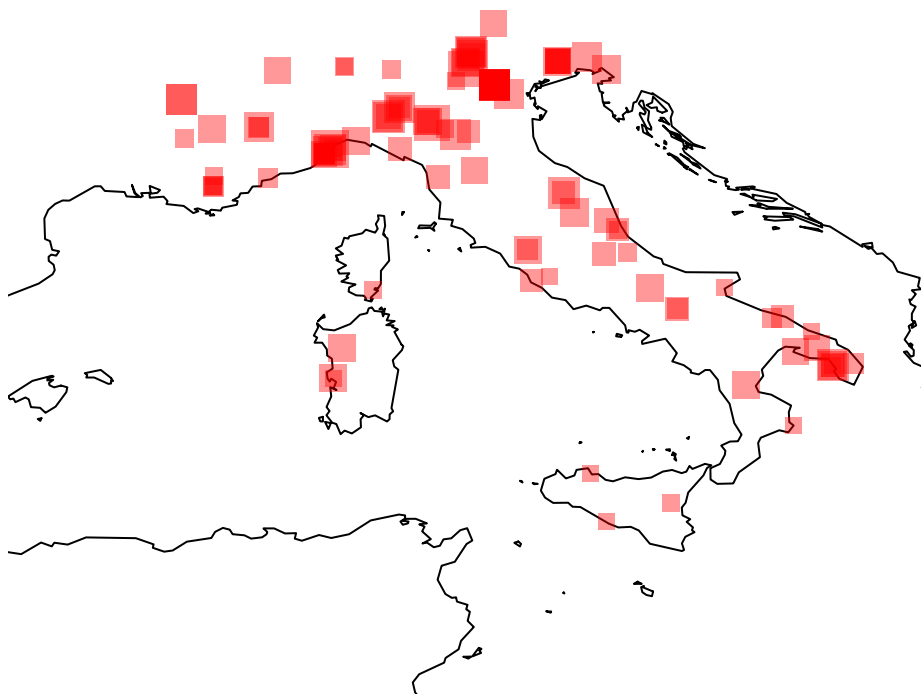

4400 cal. BC

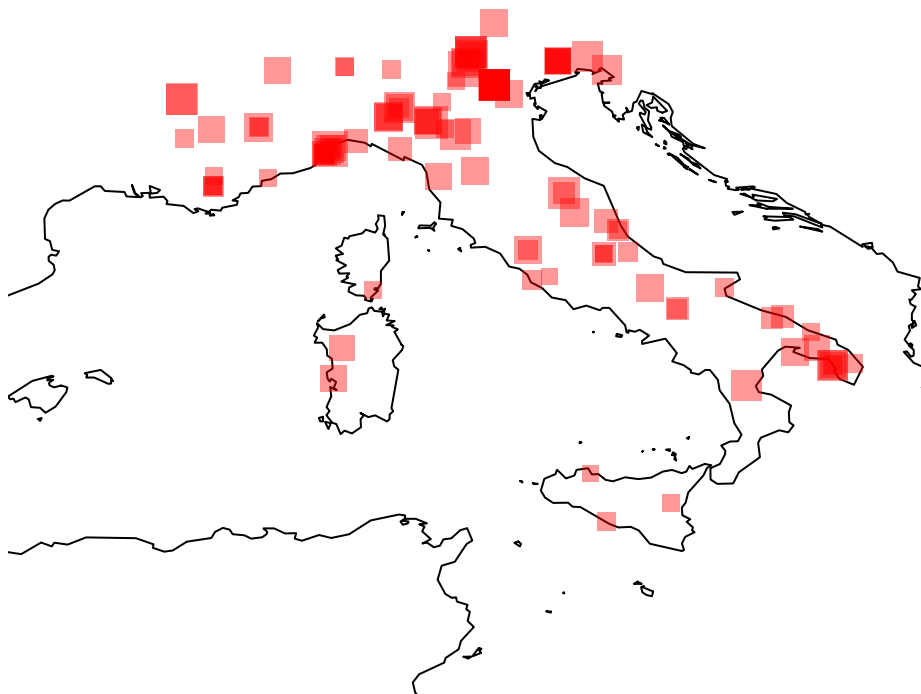

4395 cal. BC

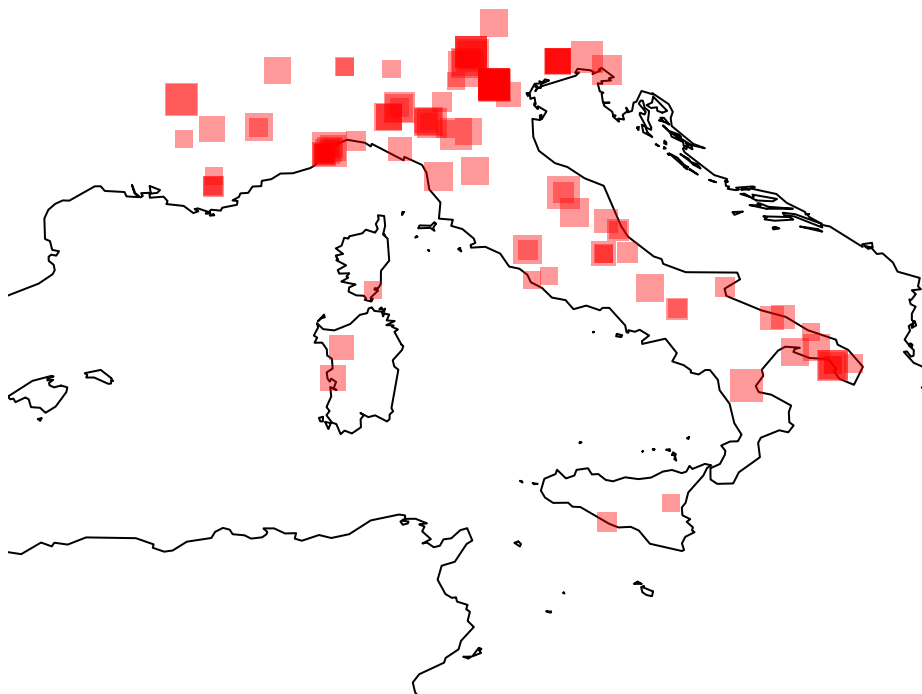

4390 cal. BC

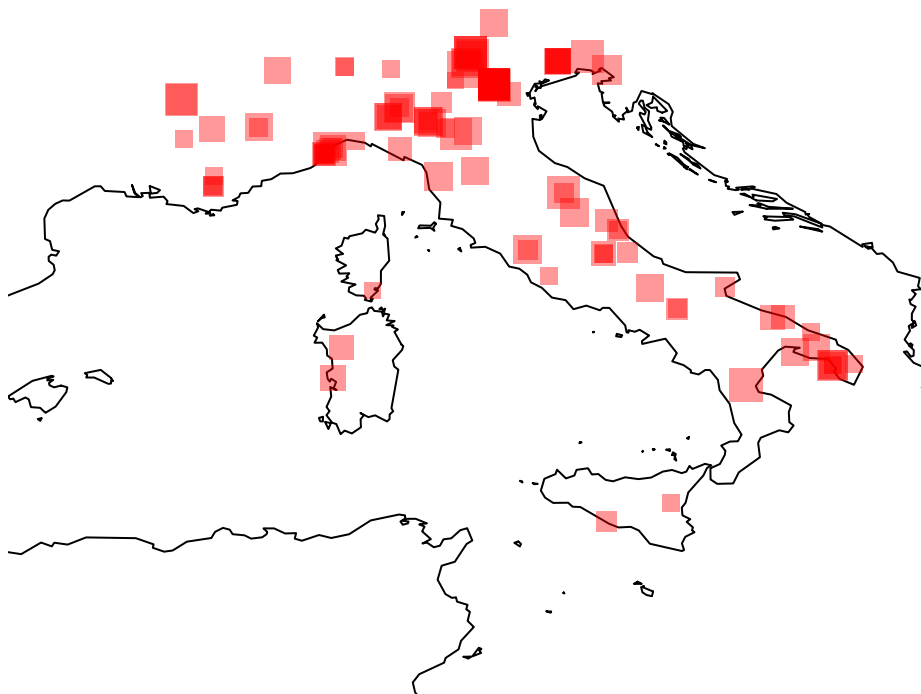

4385 cal. BC

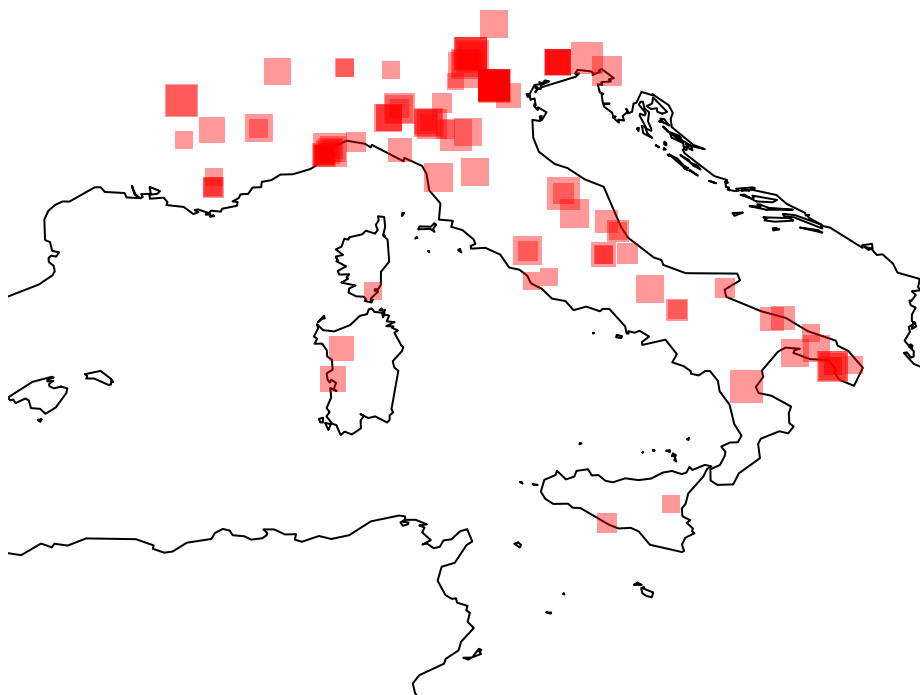

4380 cal. BC

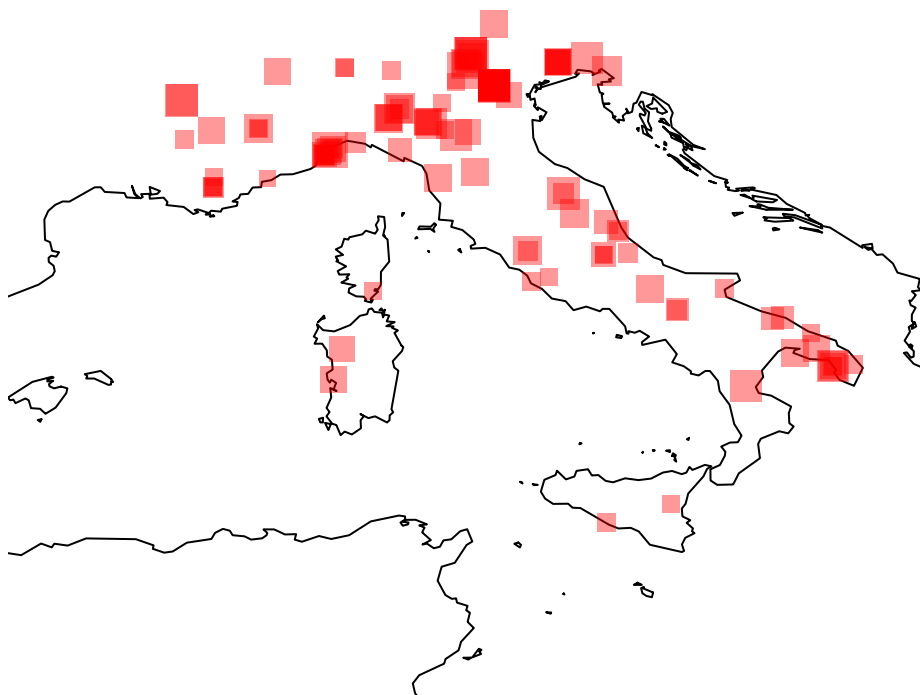

4375 cal. BC

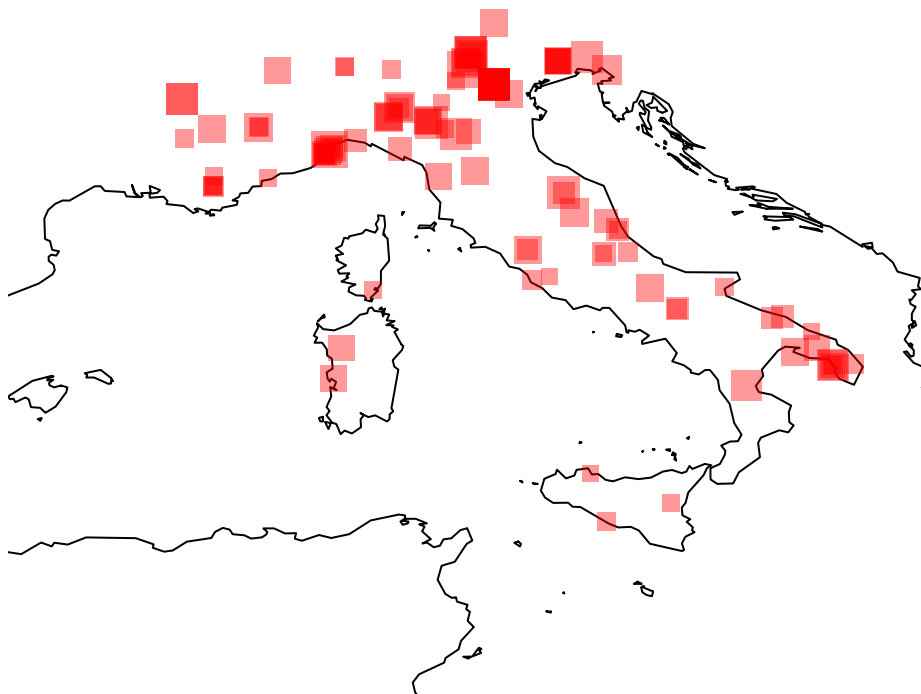

4370 cal. BC

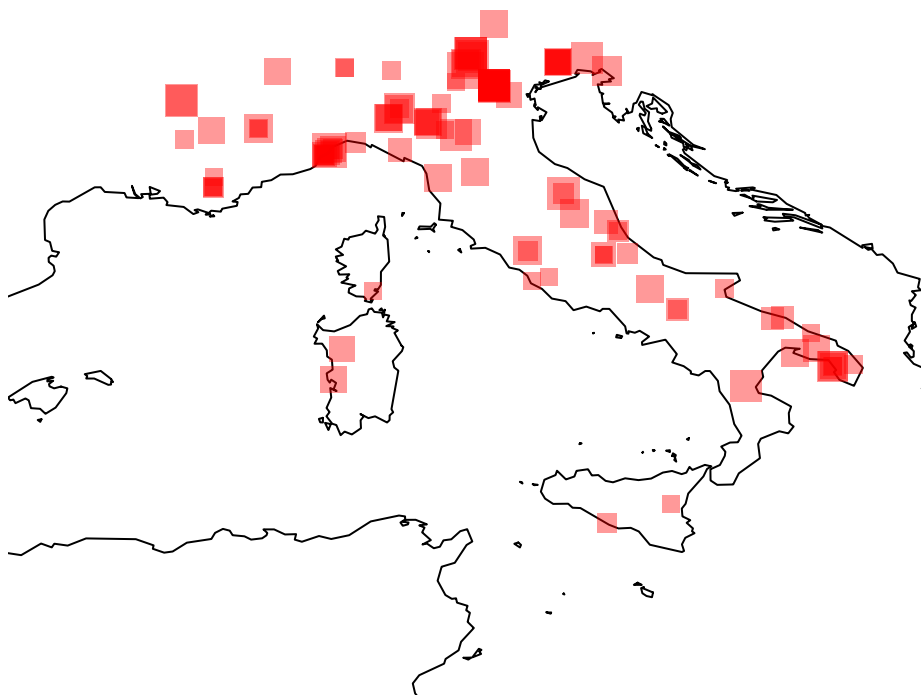



4365 cal. BC

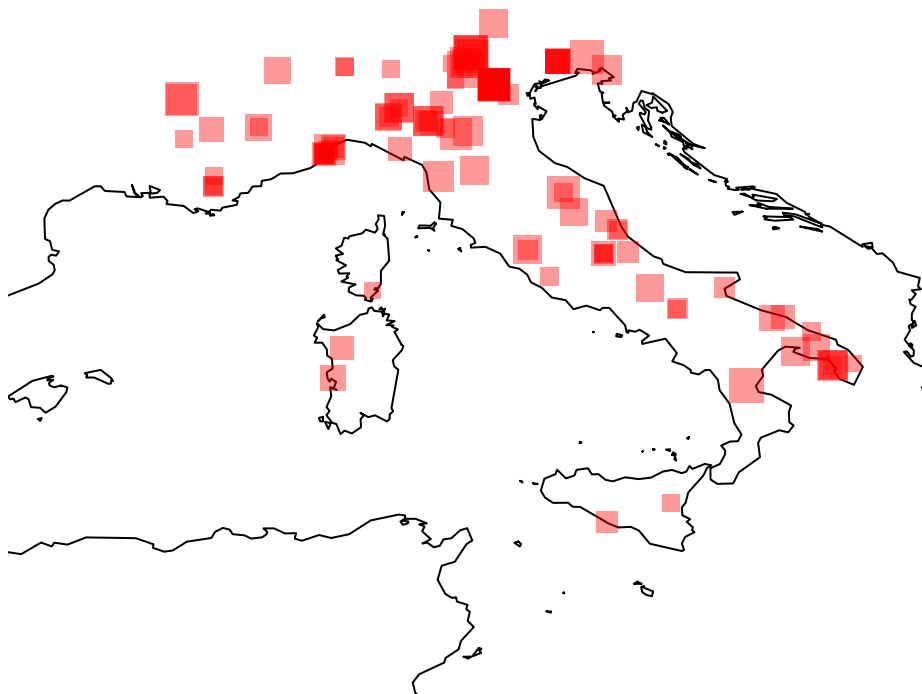

4360 cal. BC

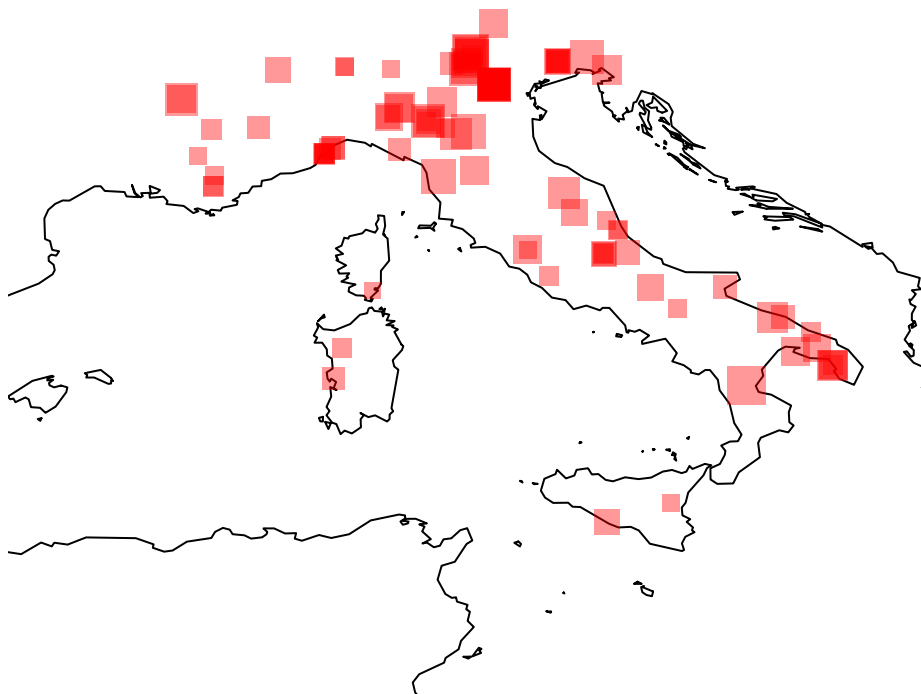

4355 cal. BC

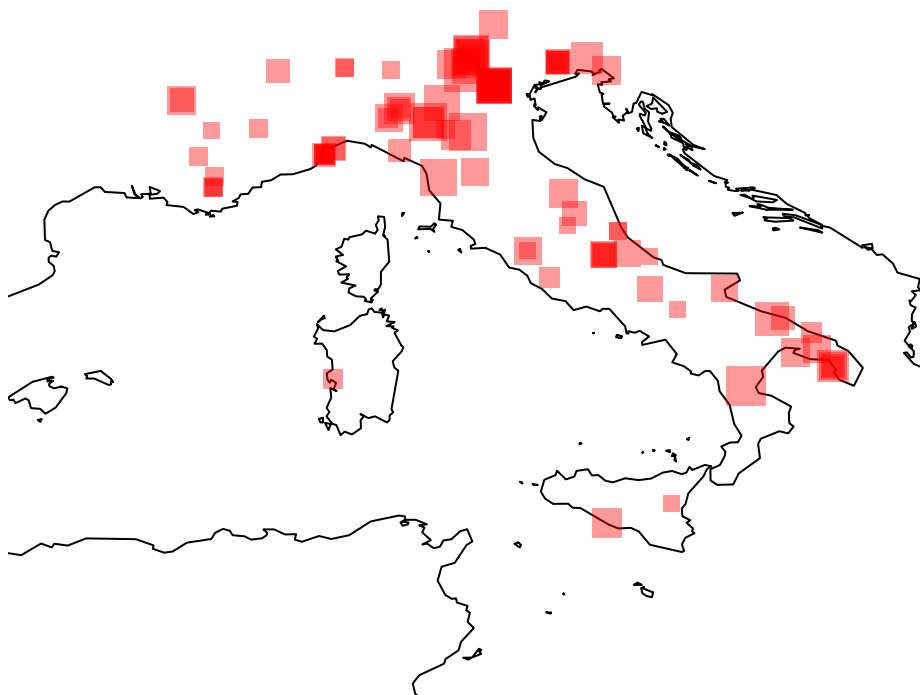

4350 cal. BC

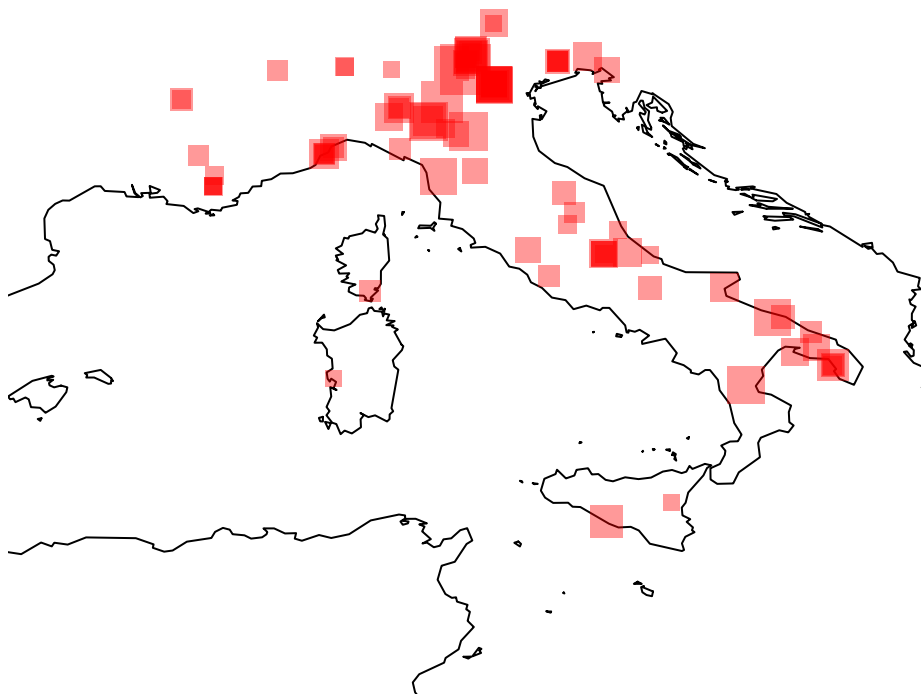

4345 cal. BC

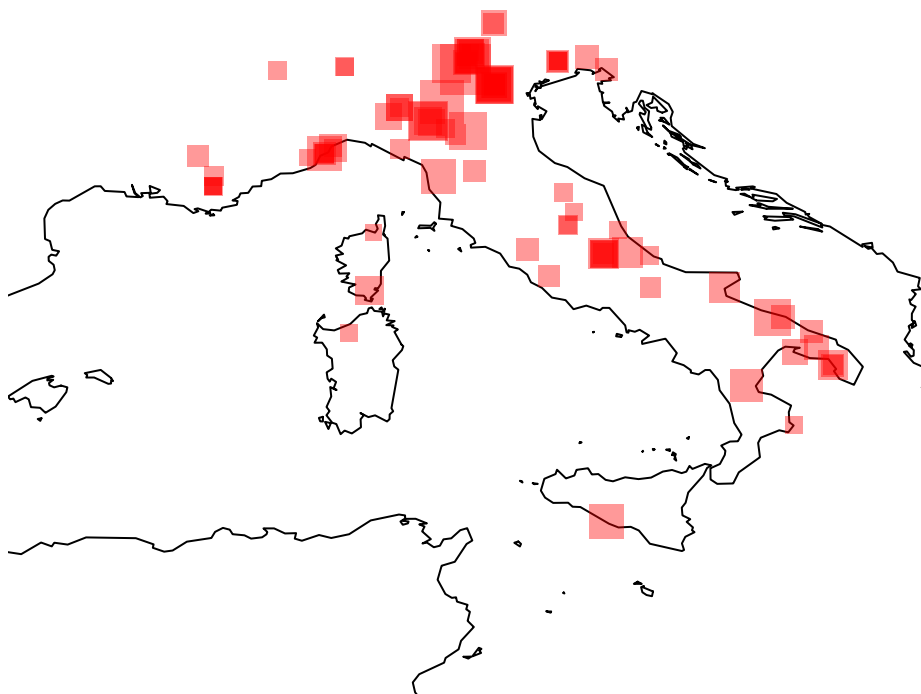

4340 cal. BC

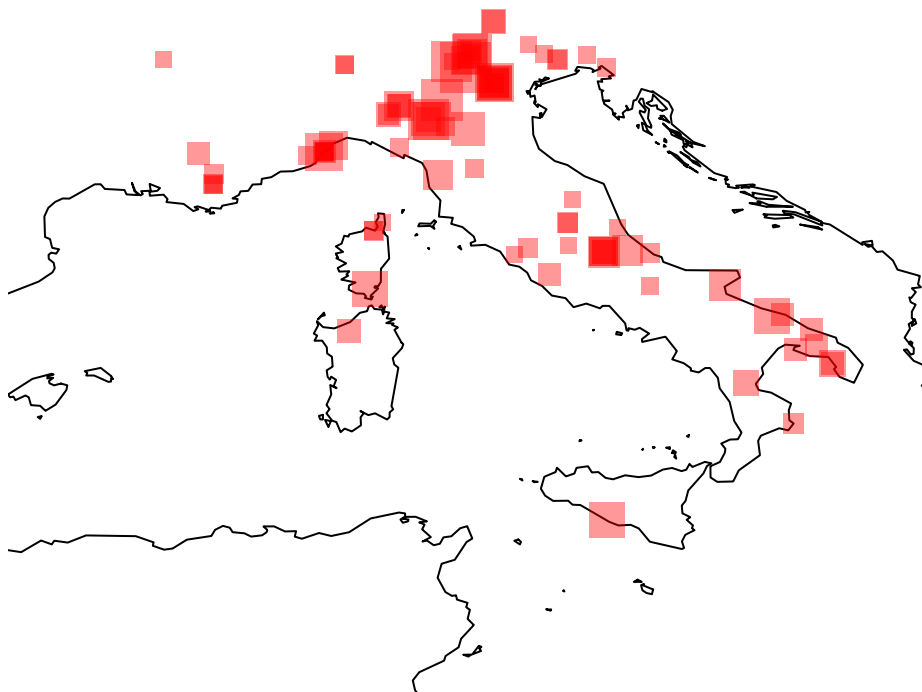

4335 cal. BC

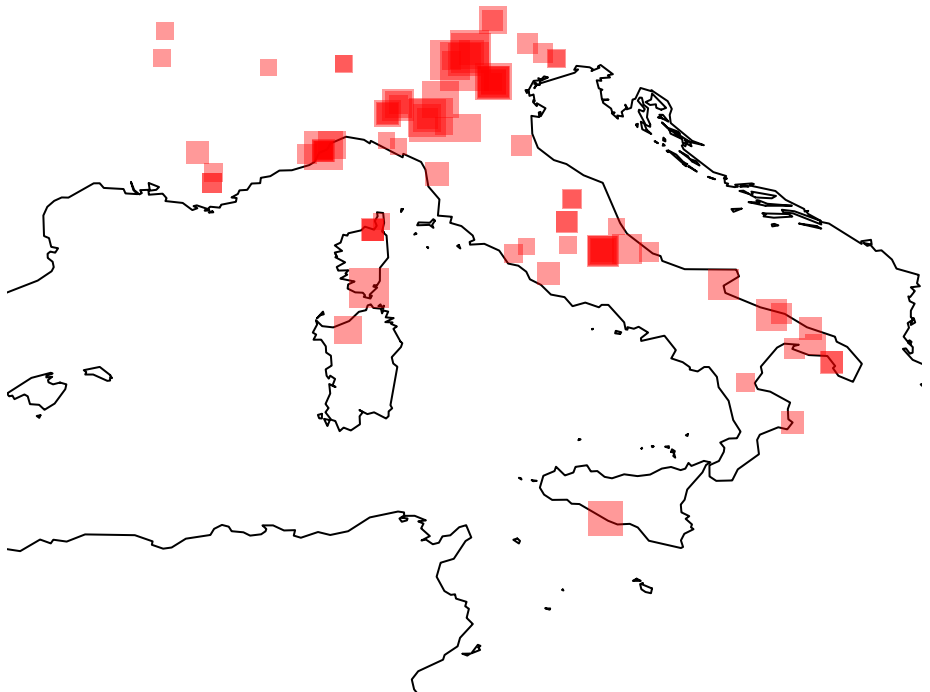

4330 cal. BC

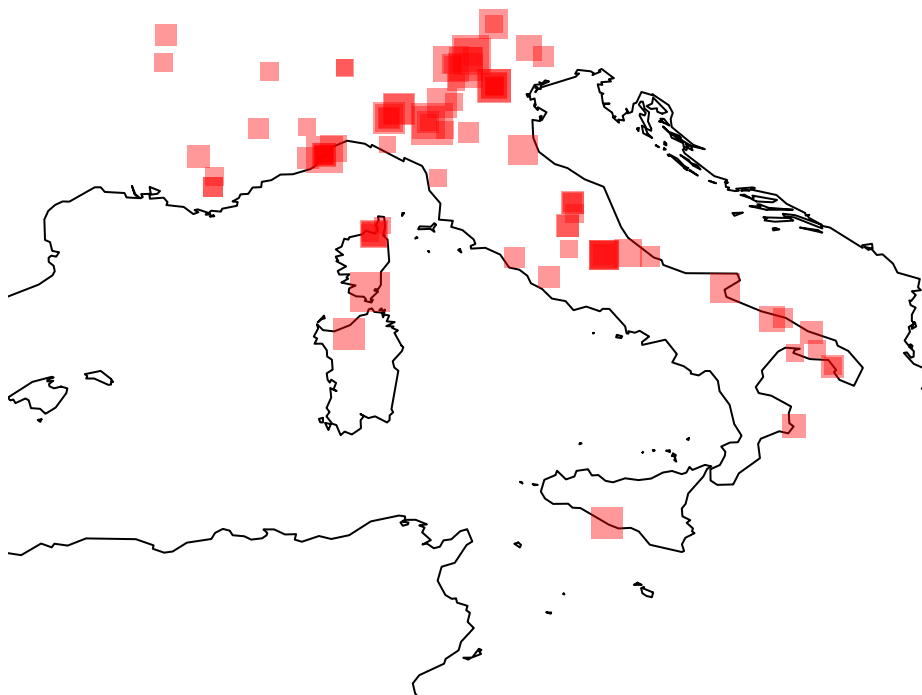



4325 cal. BC

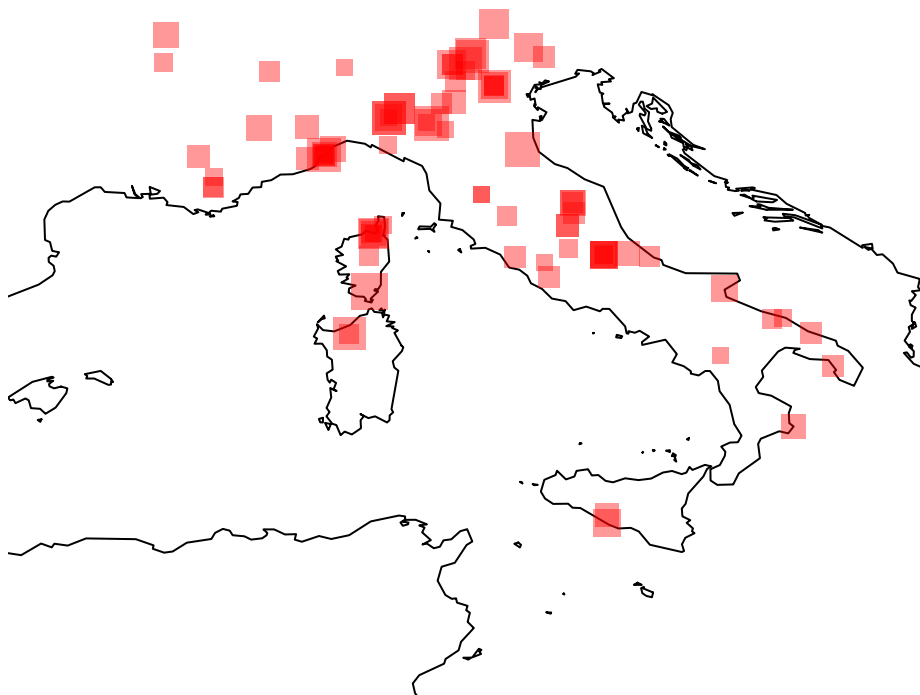

4320 cal. BC

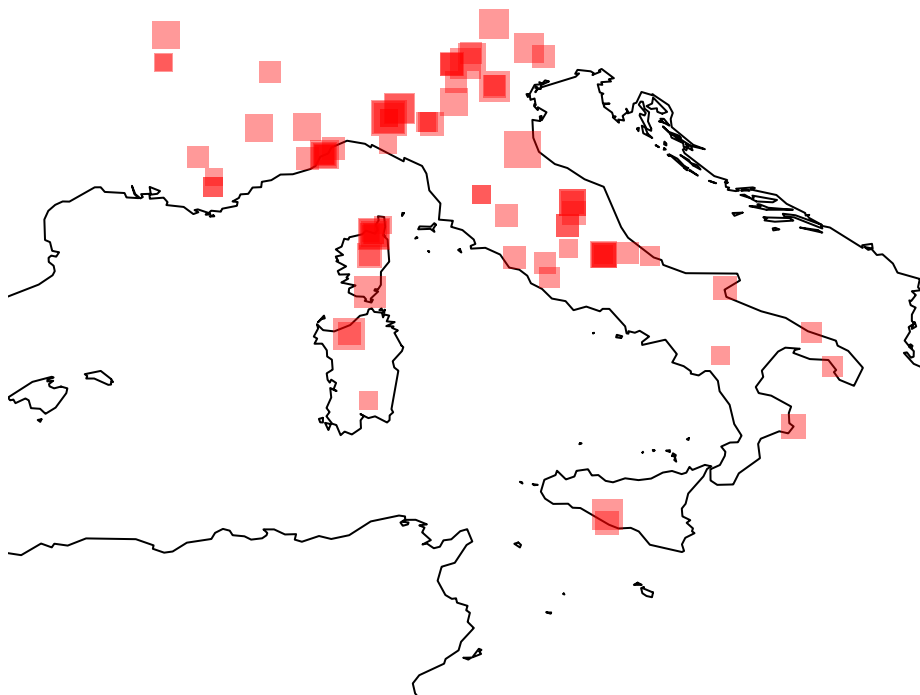

4315 cal. BC

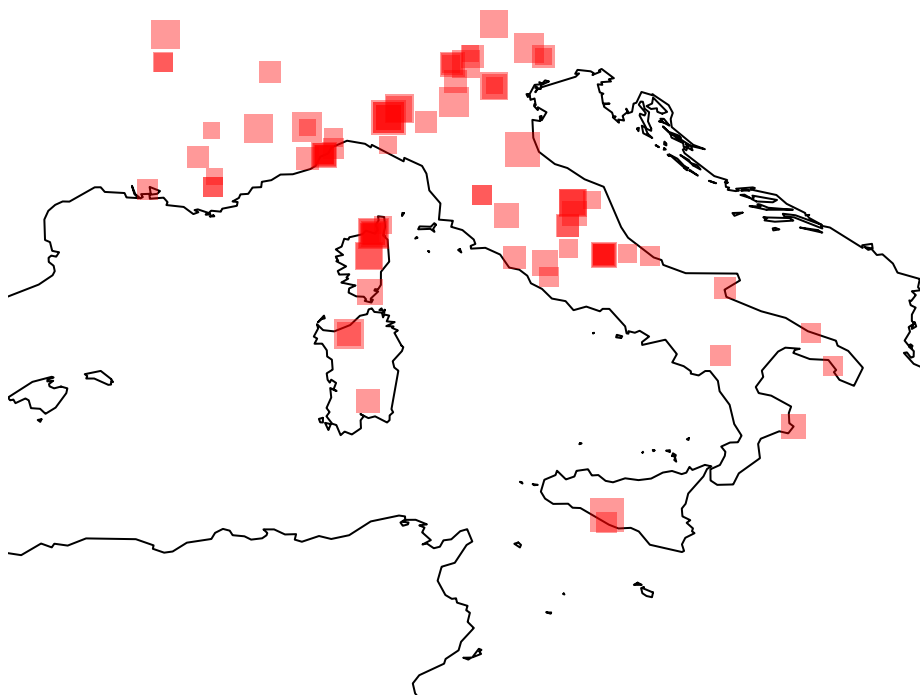

4310 cal. BC

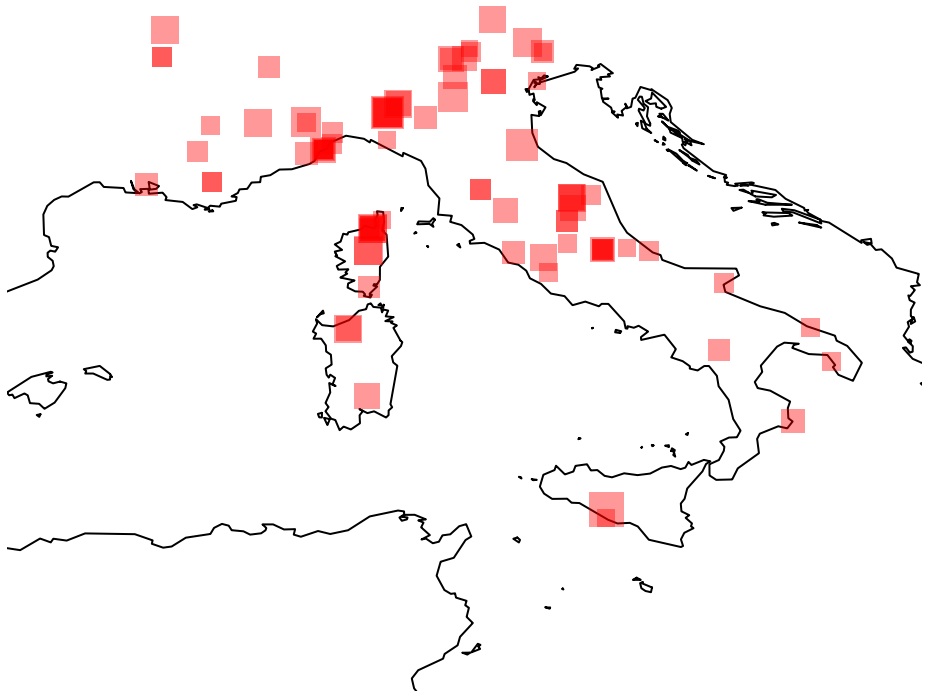

4305 cal. BC

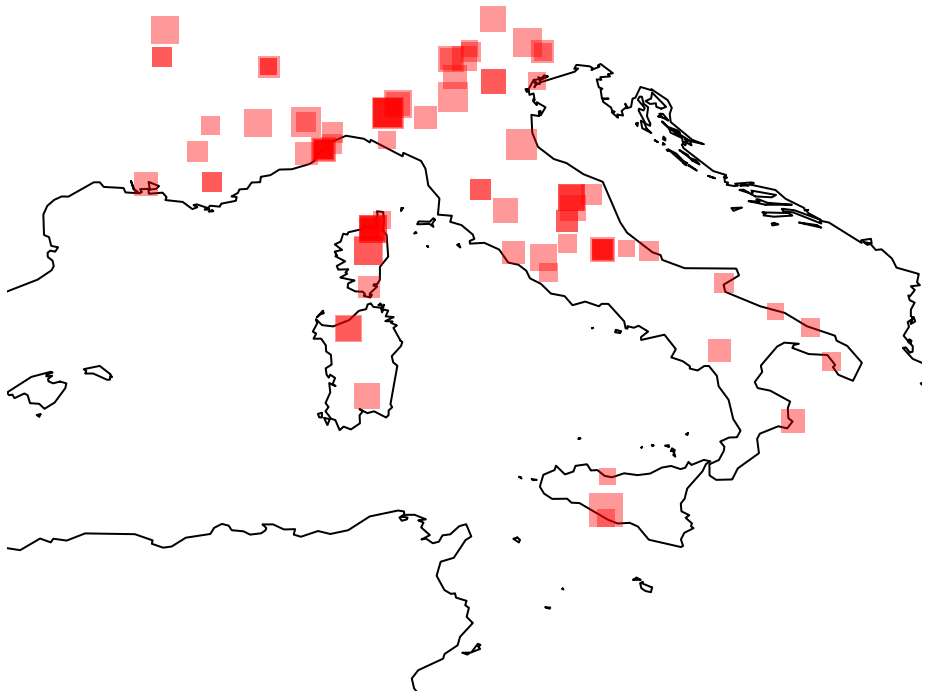

4300 cal. BC

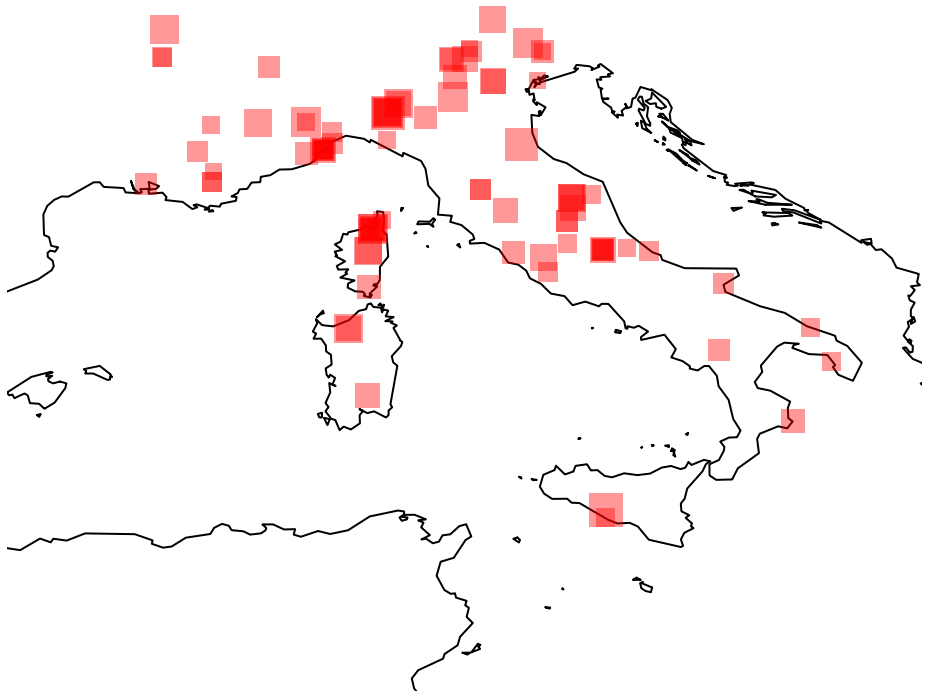

4295 cal. BC

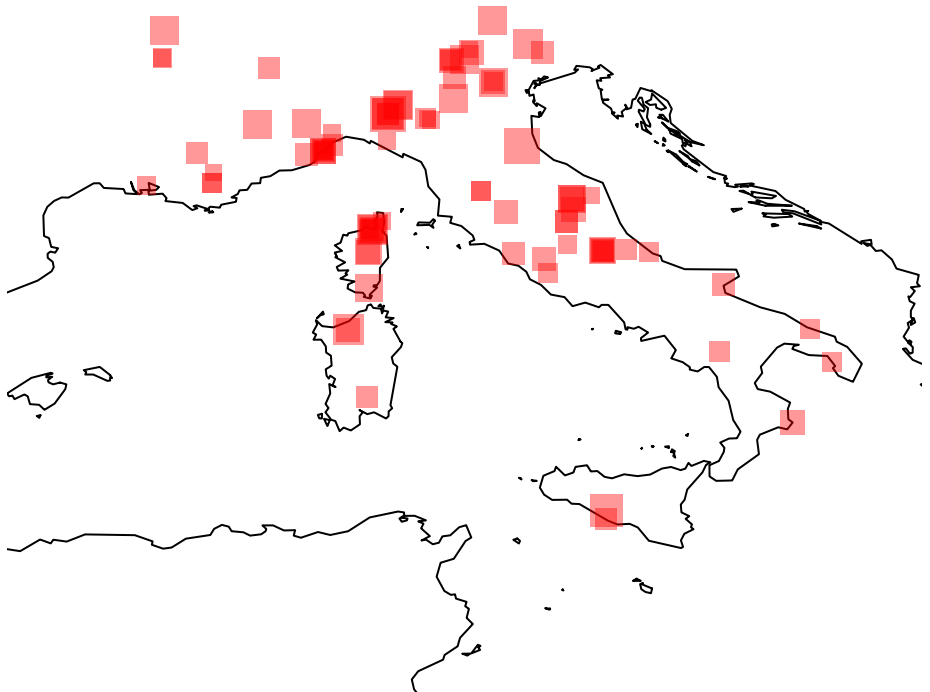

4290 cal. BC

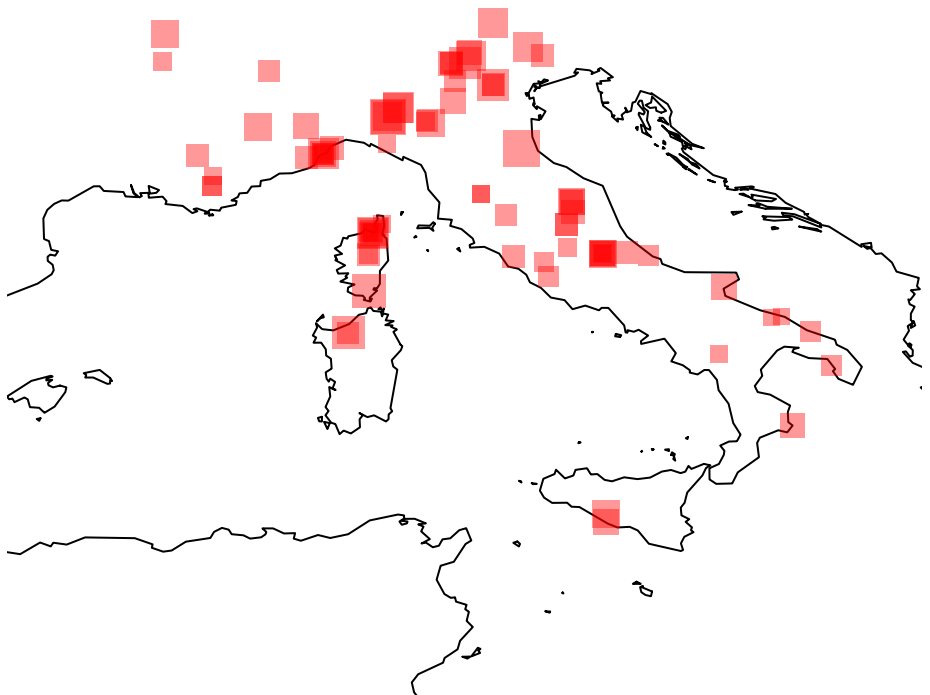



4285 cal. BC

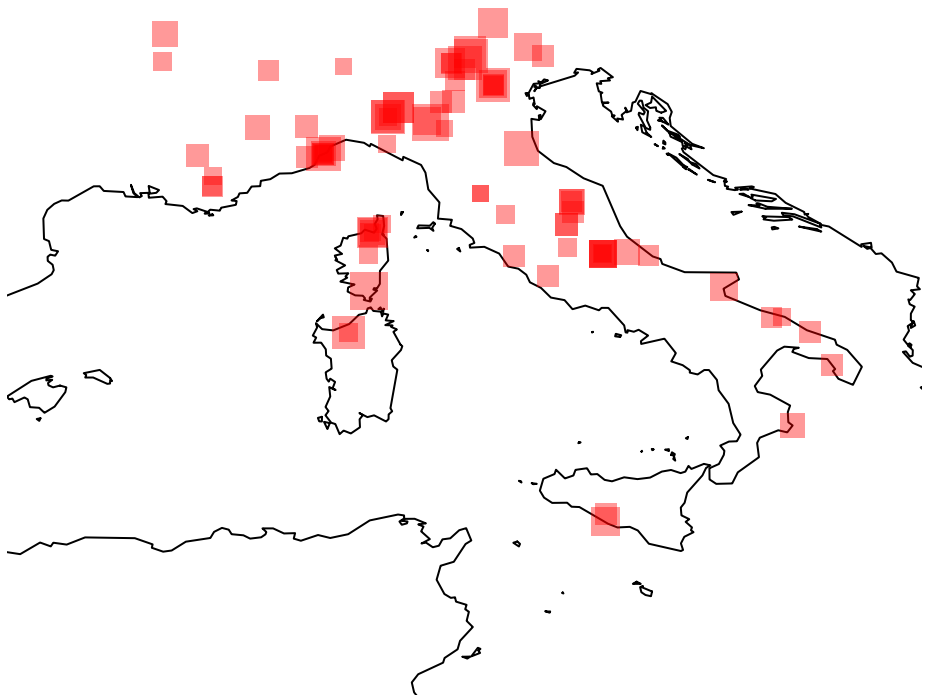

4280 cal. BC

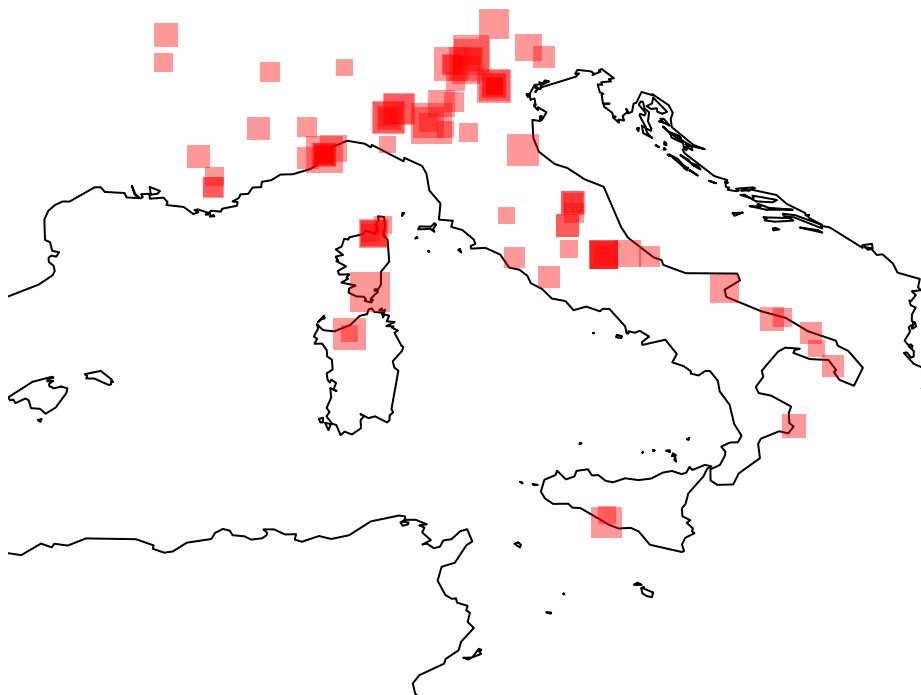

4275 cal. BC

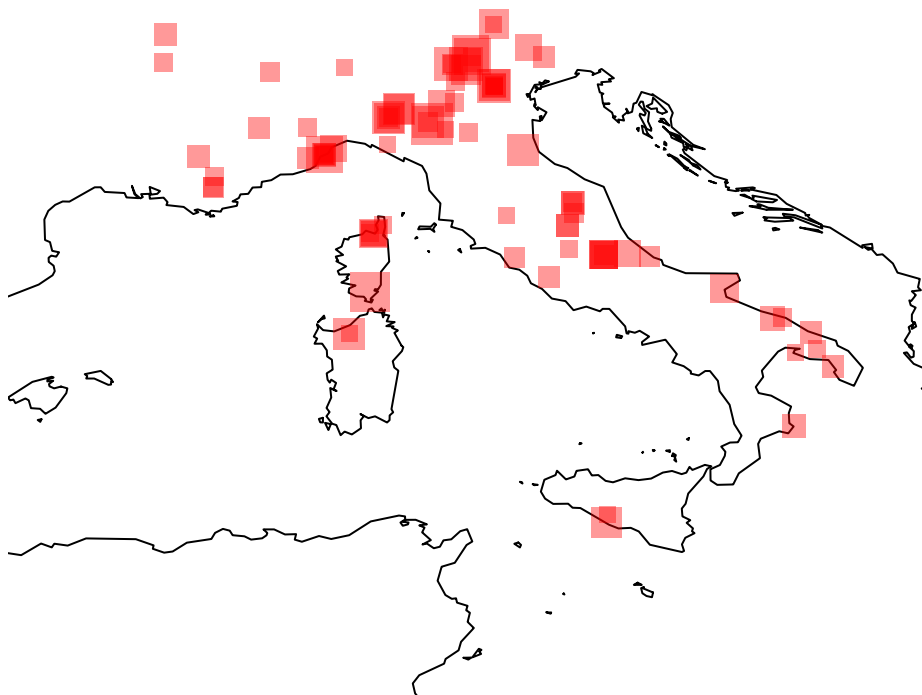

4270 cal. BC

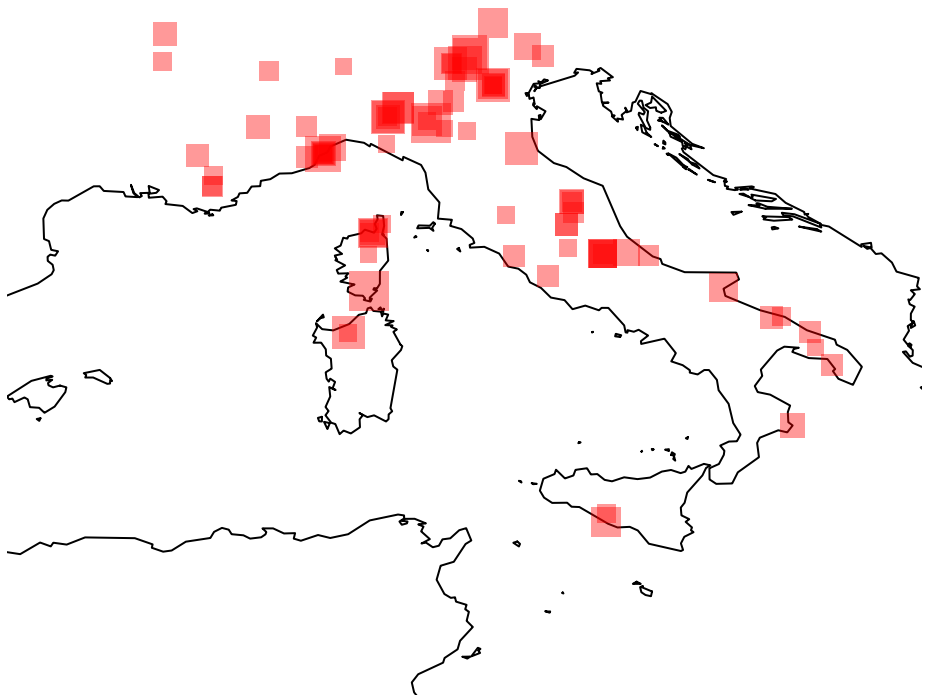

4265 cal. BC

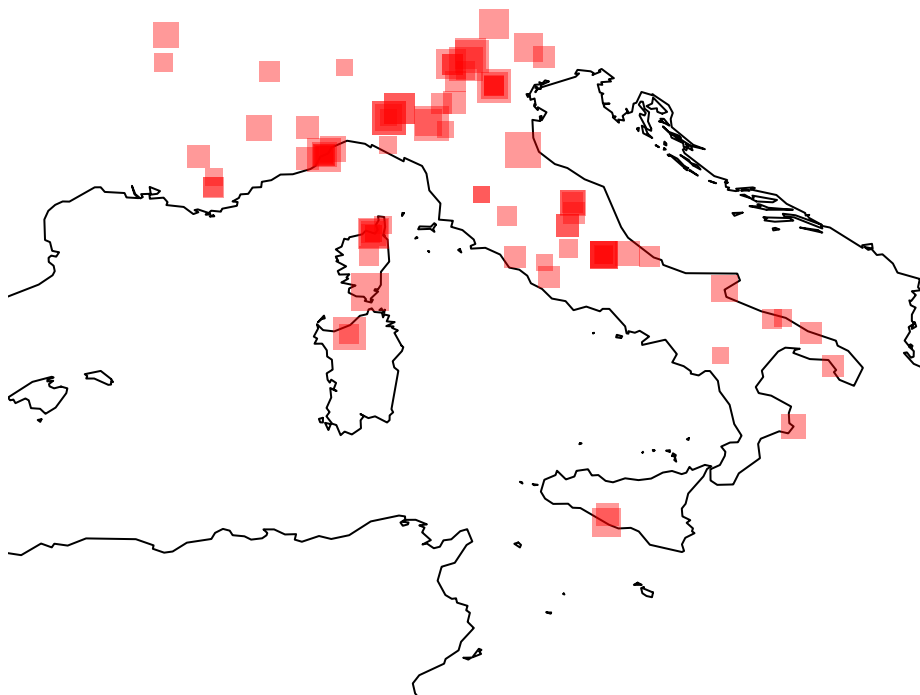

4260 cal. BC

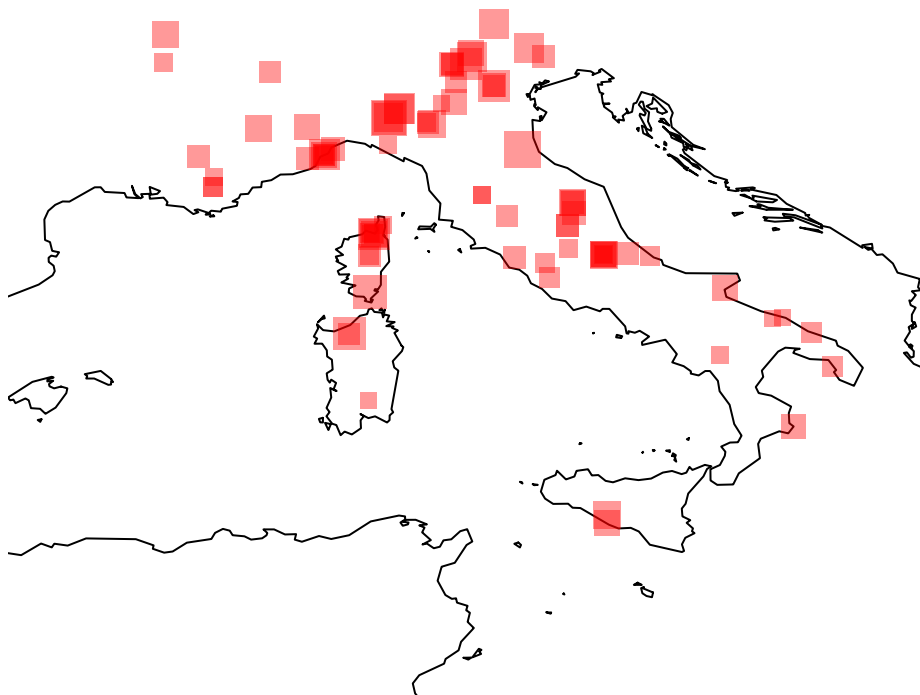

4255 cal. BC

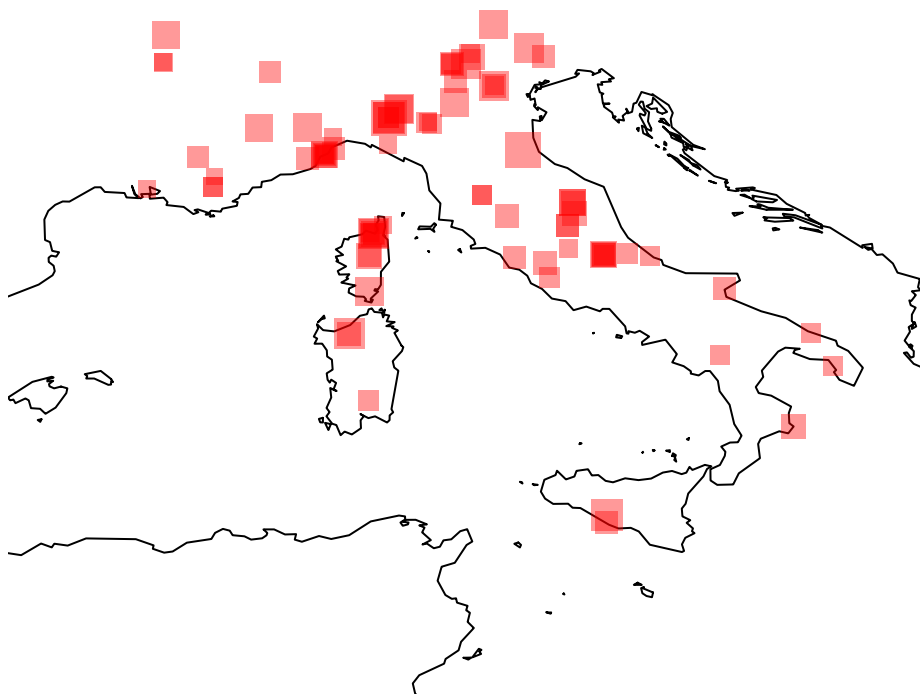

4250 cal. BC

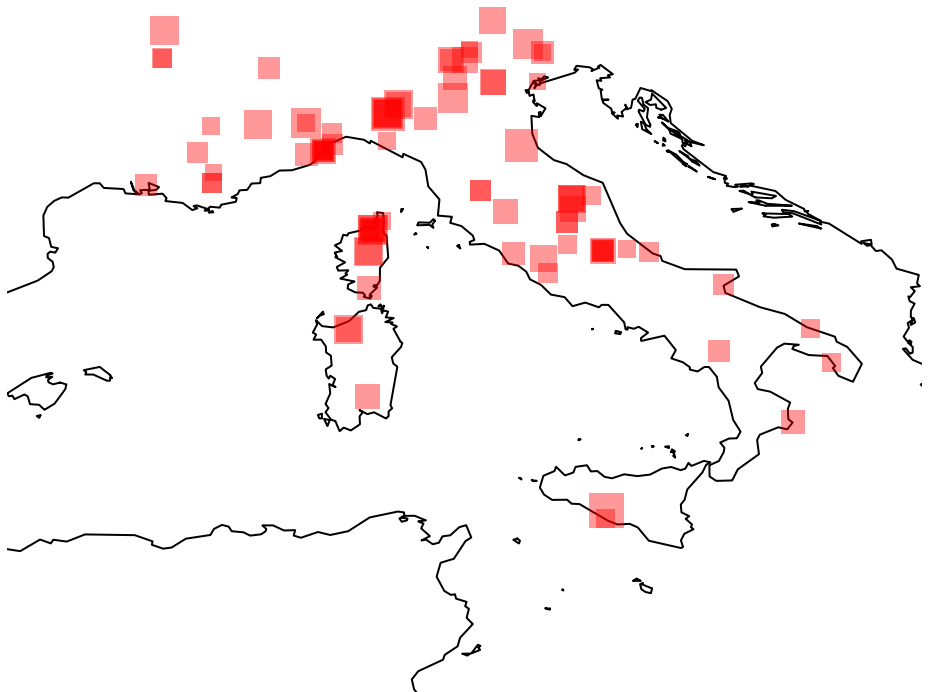



4245 cal. BC

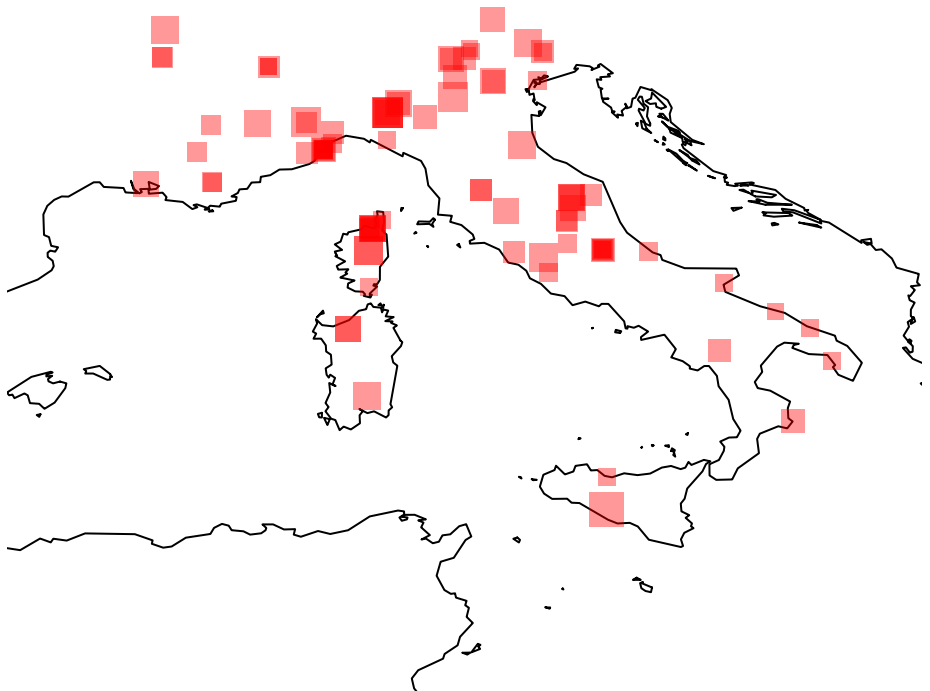

4240 cal. BC

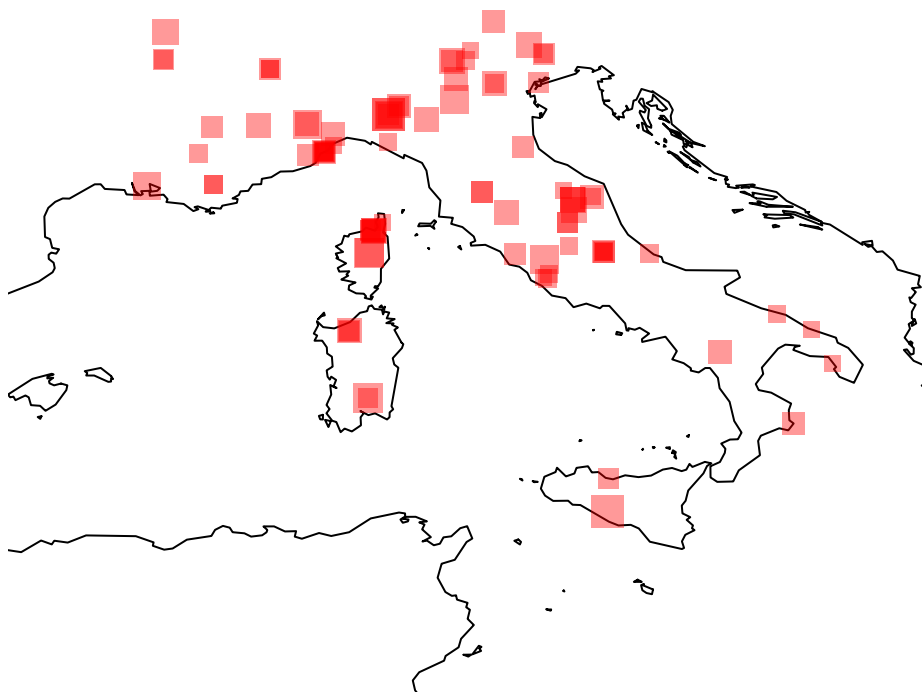

4235 cal. BC

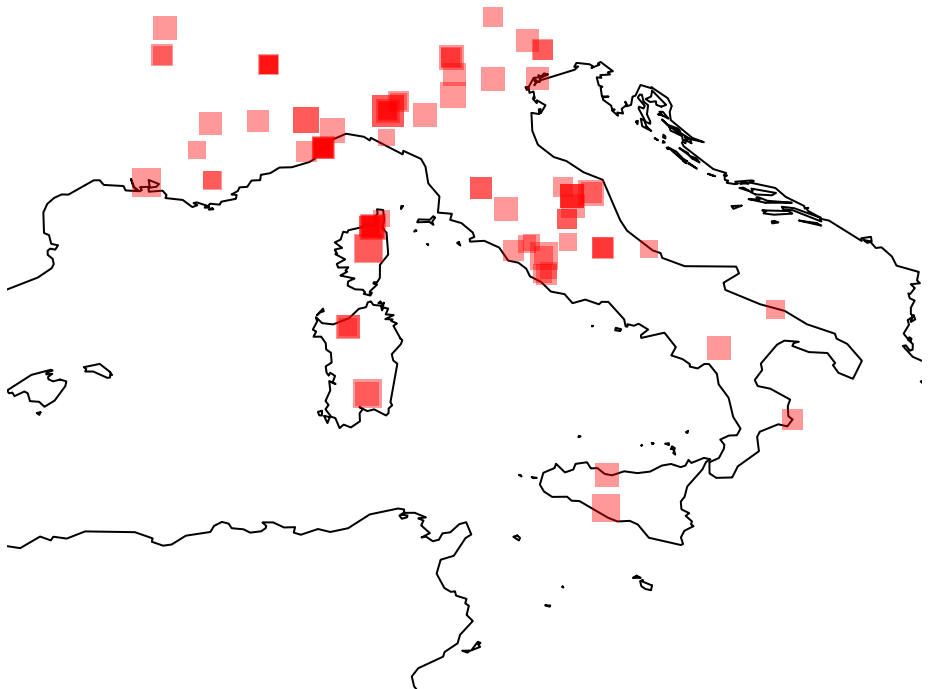

4230 cal. BC

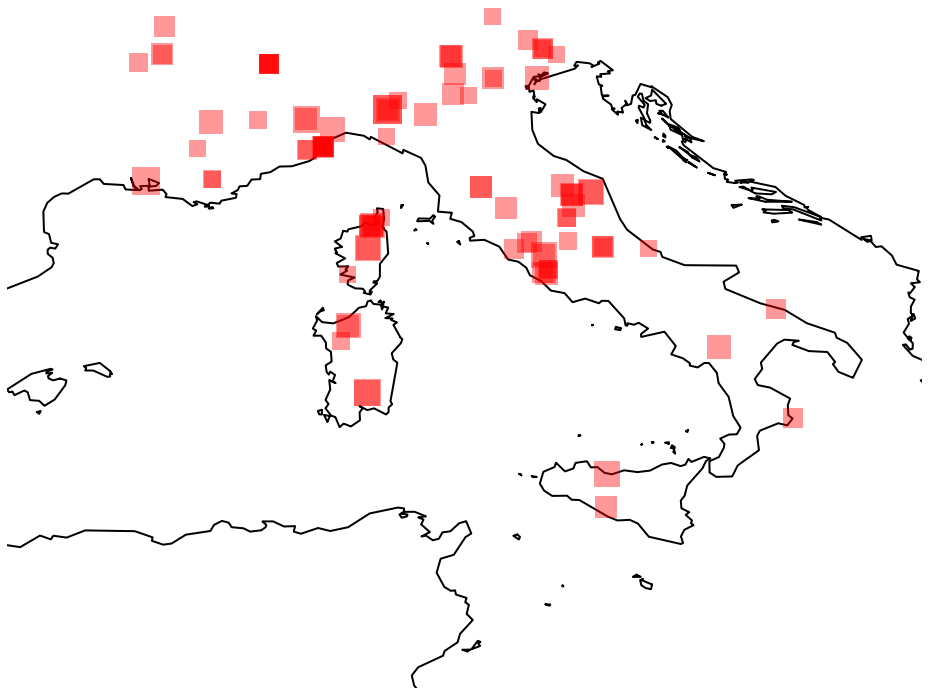

4225 cal. BC

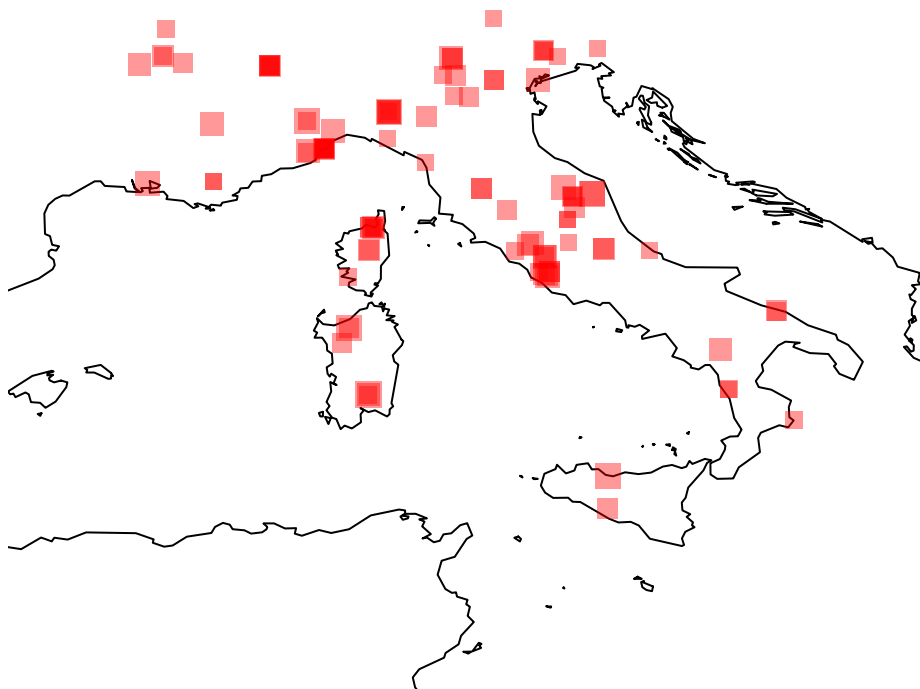

4220 cal. BC

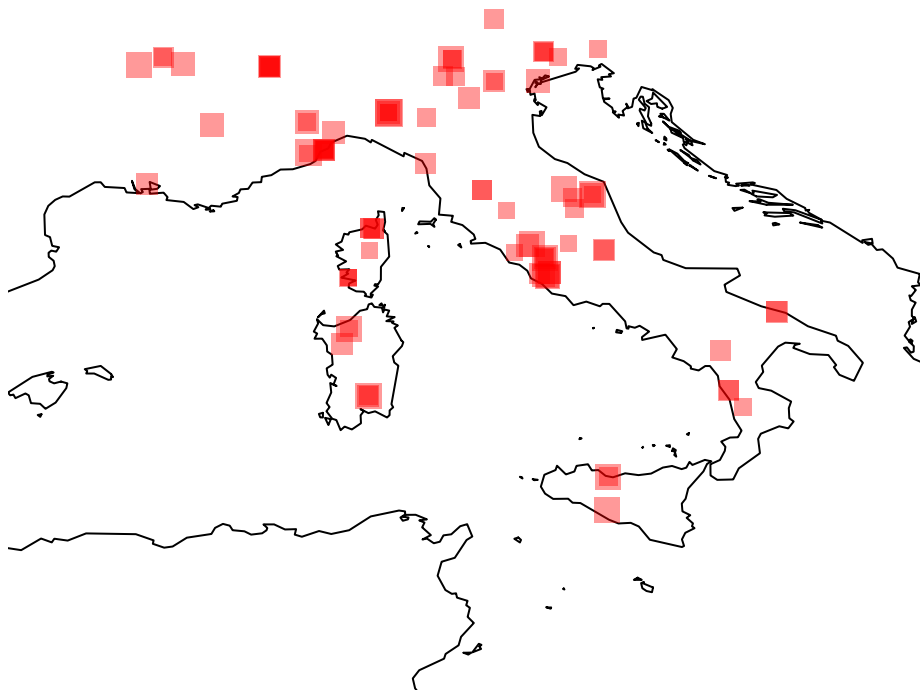

4215 cal. BC

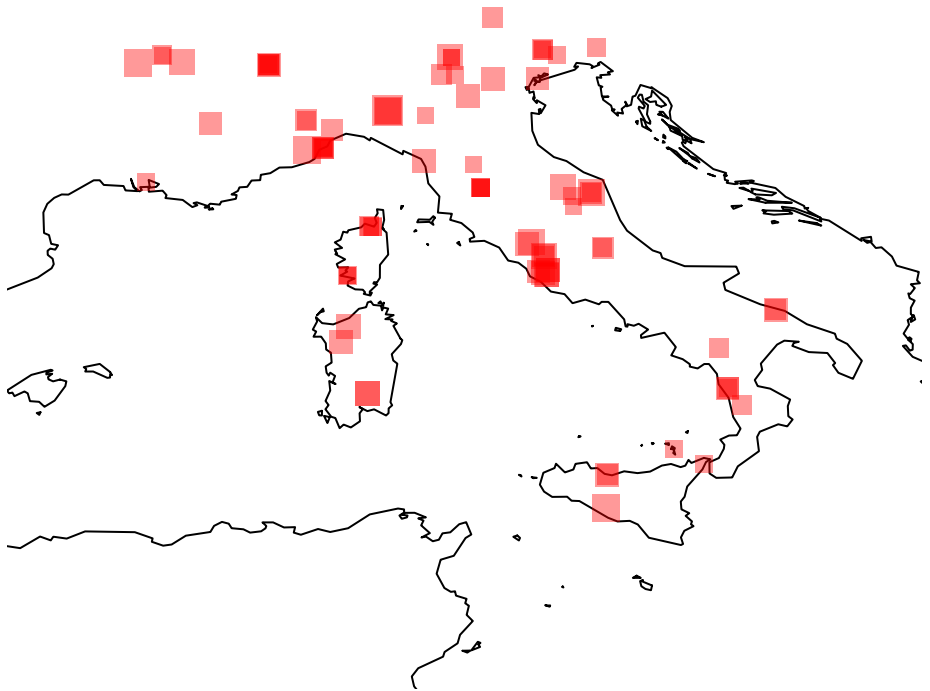

4210 cal. BC

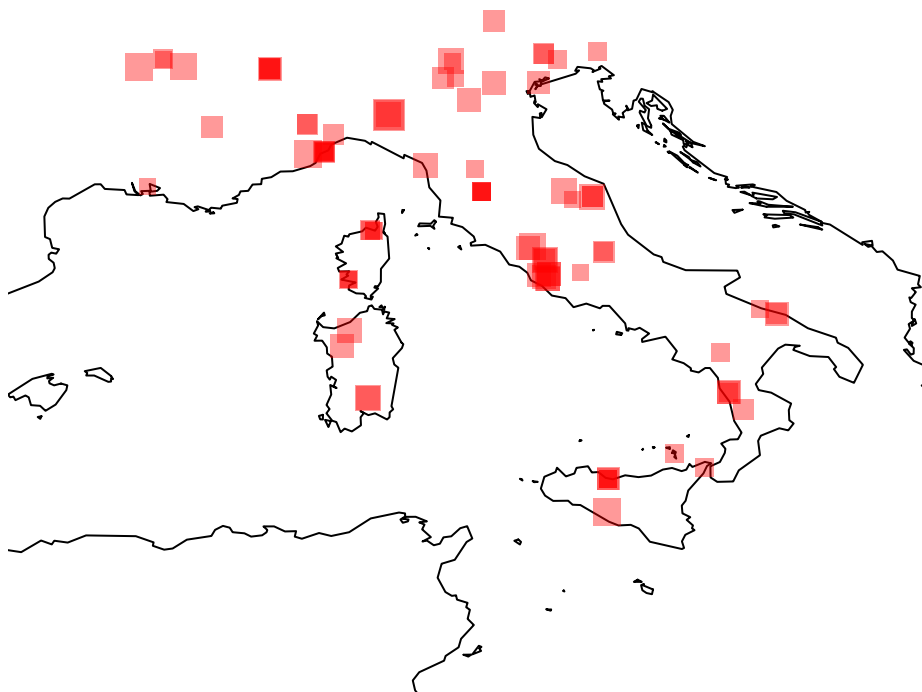



4205 cal. BC

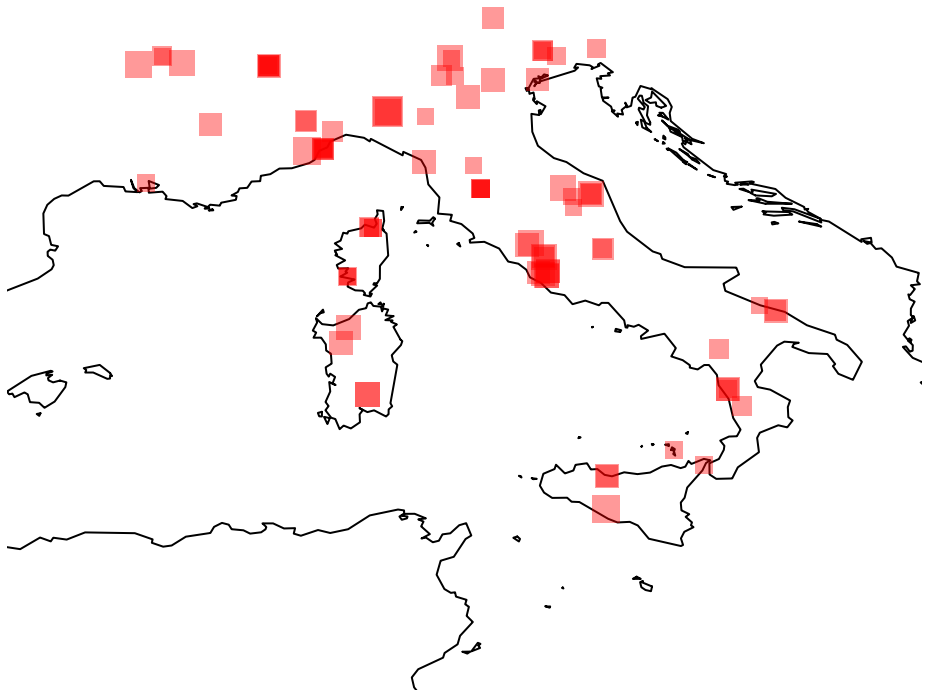

4200 cal. BC

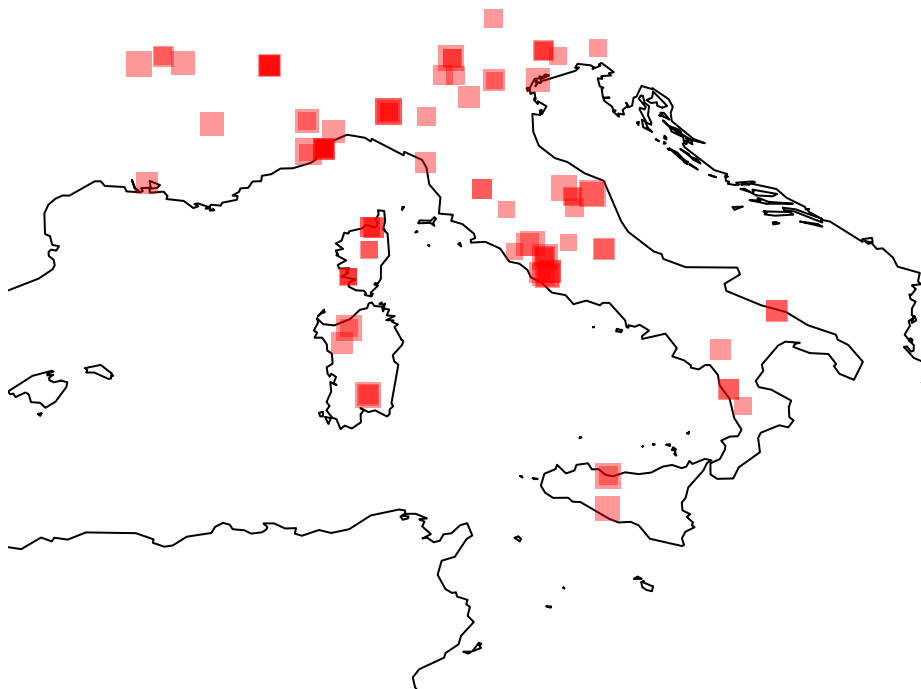

4195 cal. BC

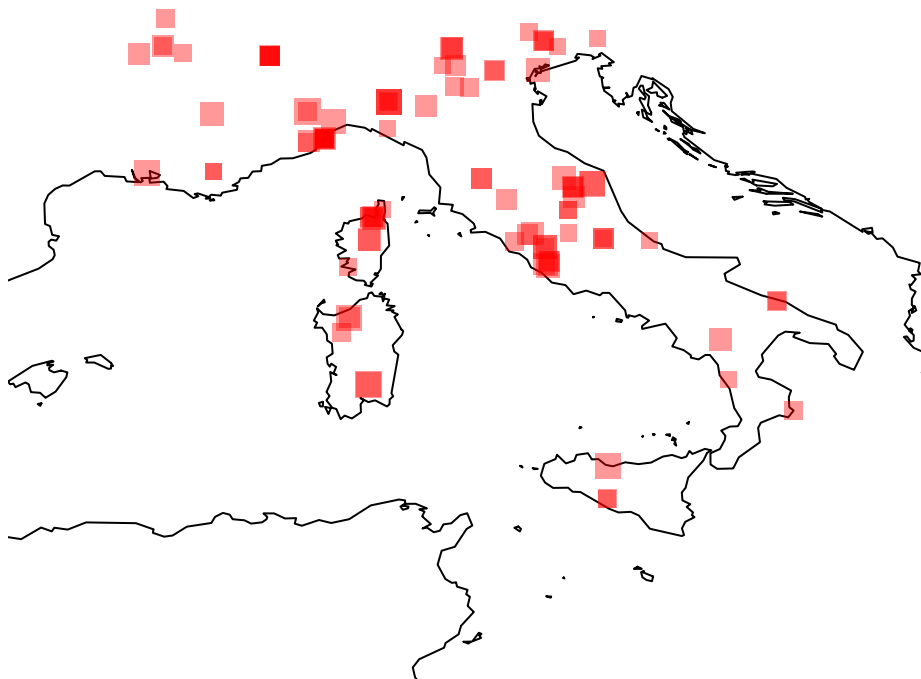

4190 cal. BC

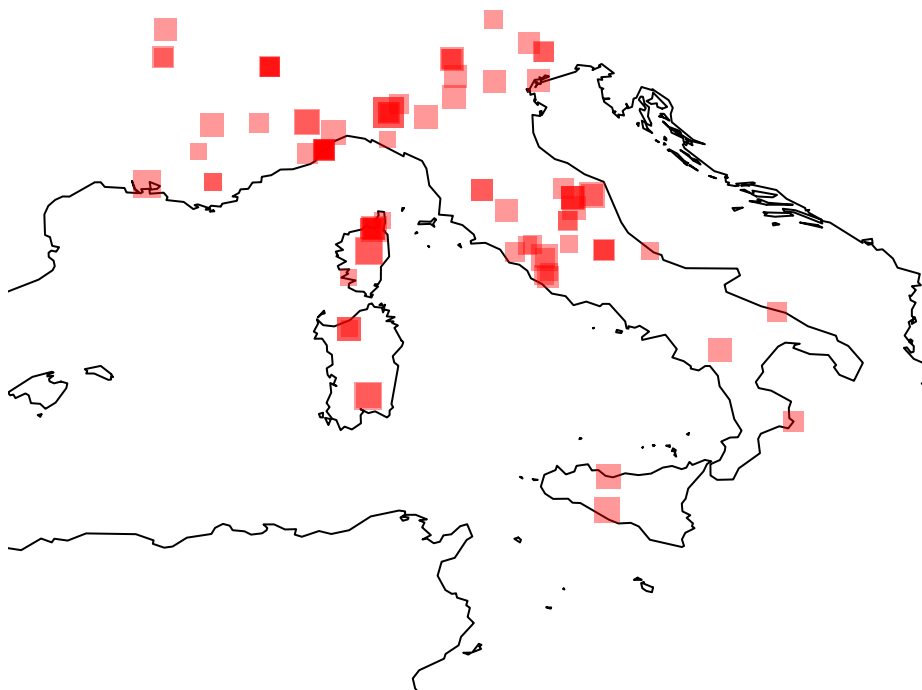

4185 cal. BC

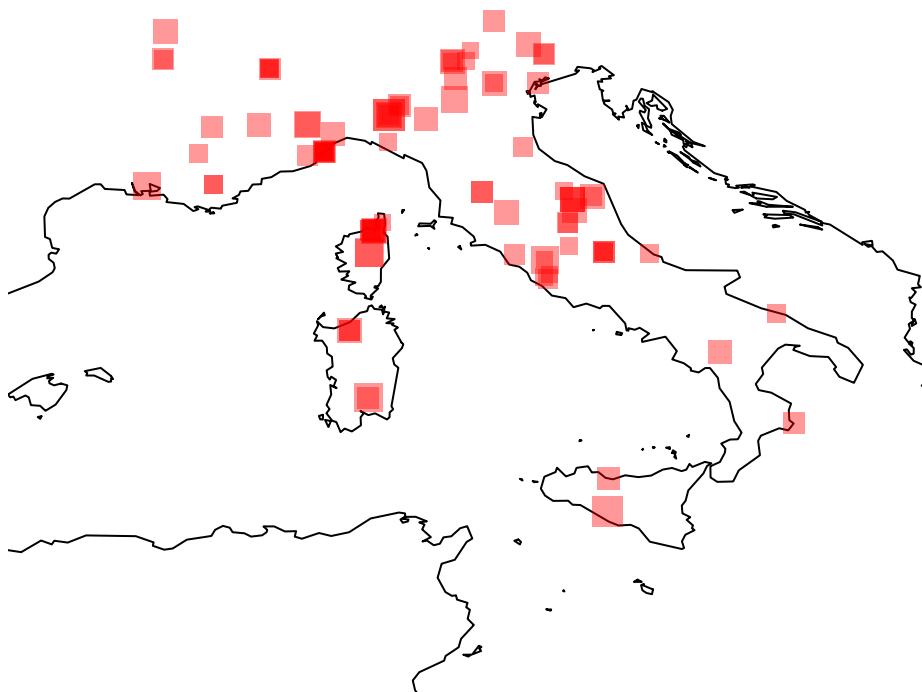

4180 cal. BC

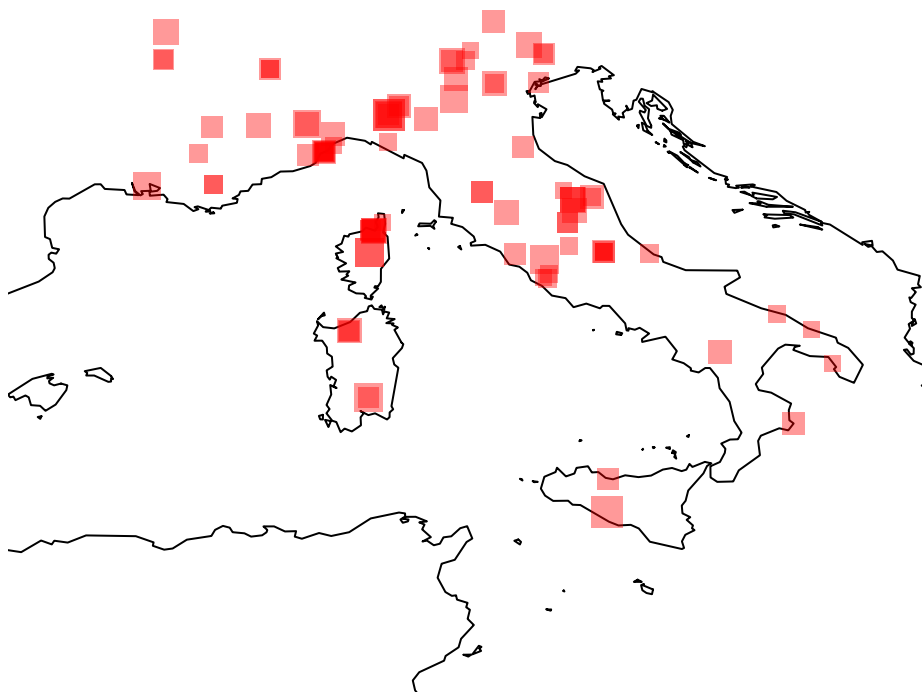

4175 cal. BC

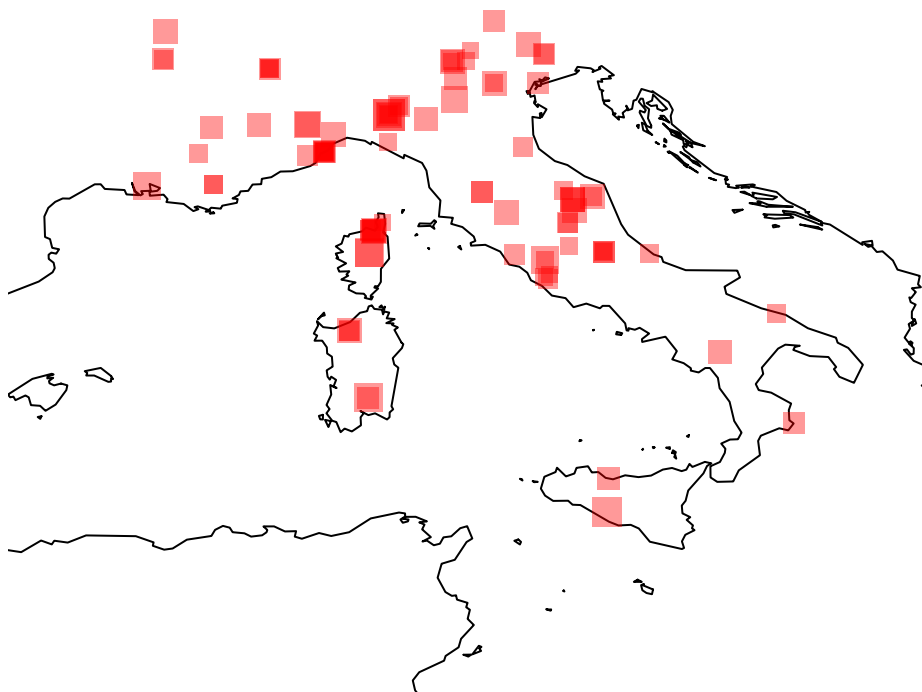

4170 cal. BC

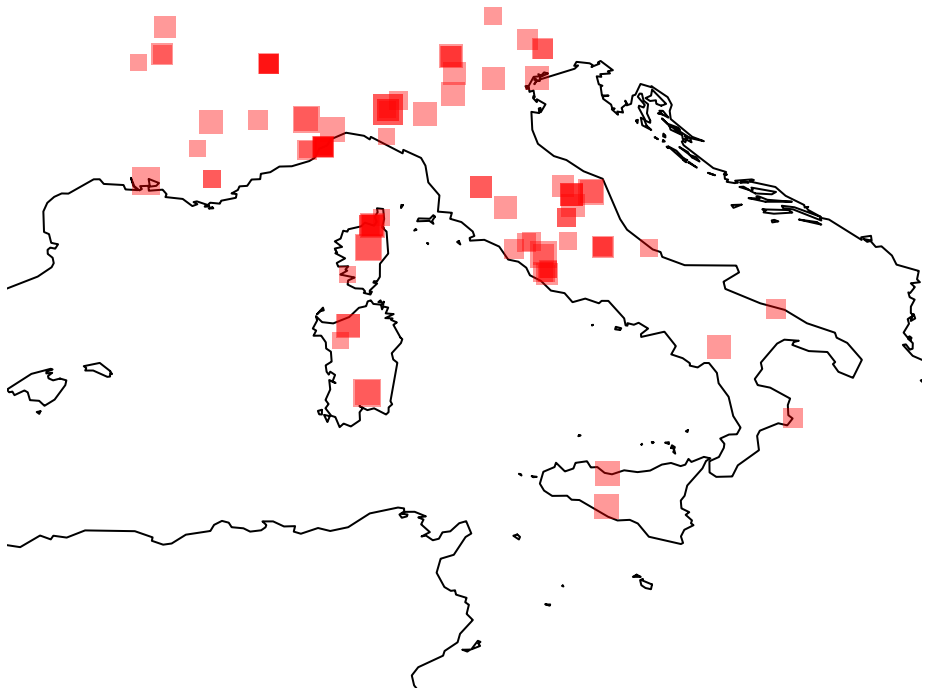



4165 cal. BC

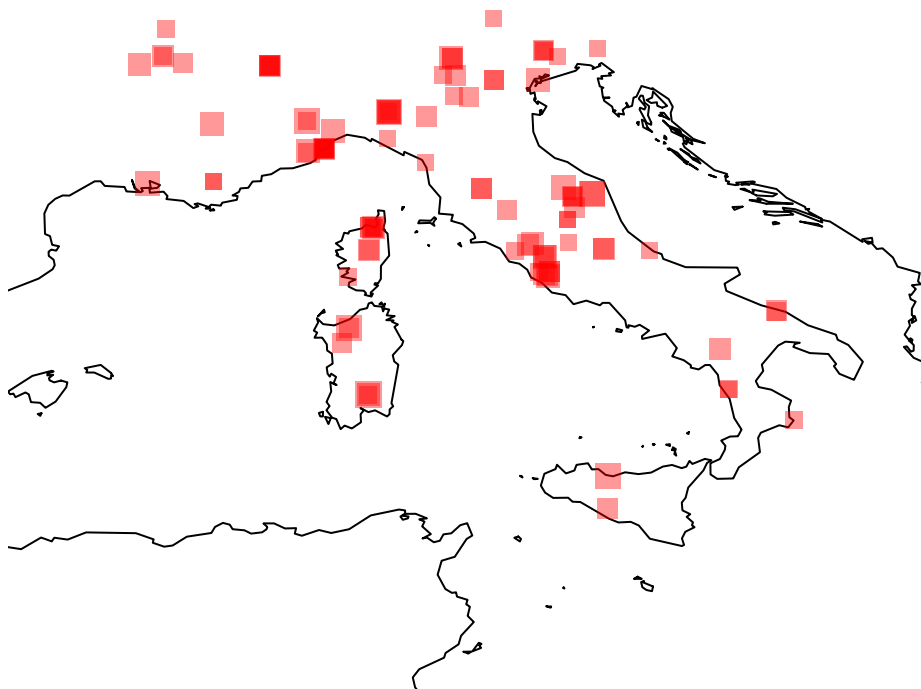

4160 cal. BC

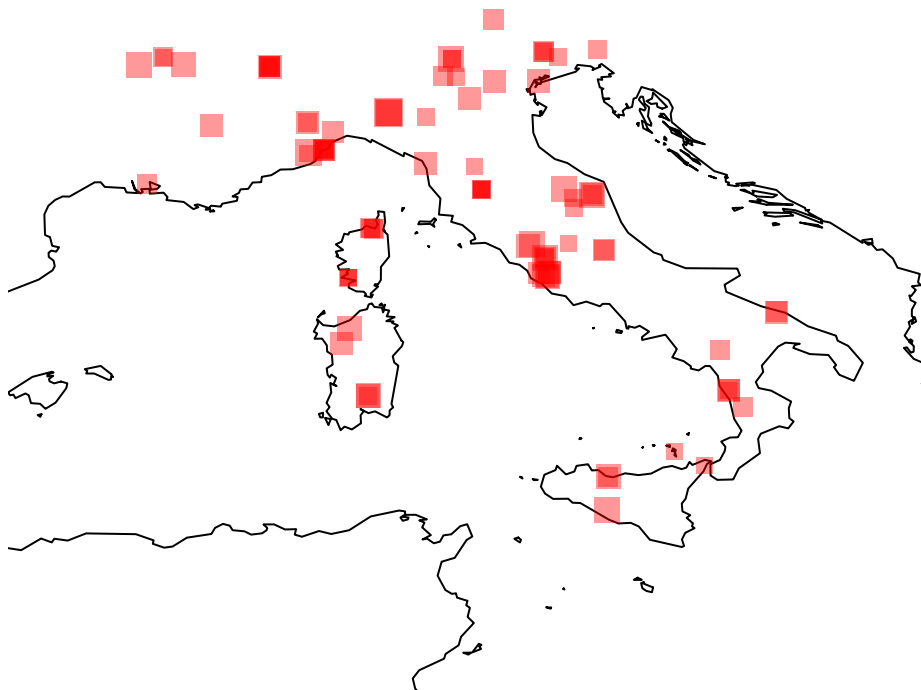

4155 cal. BC

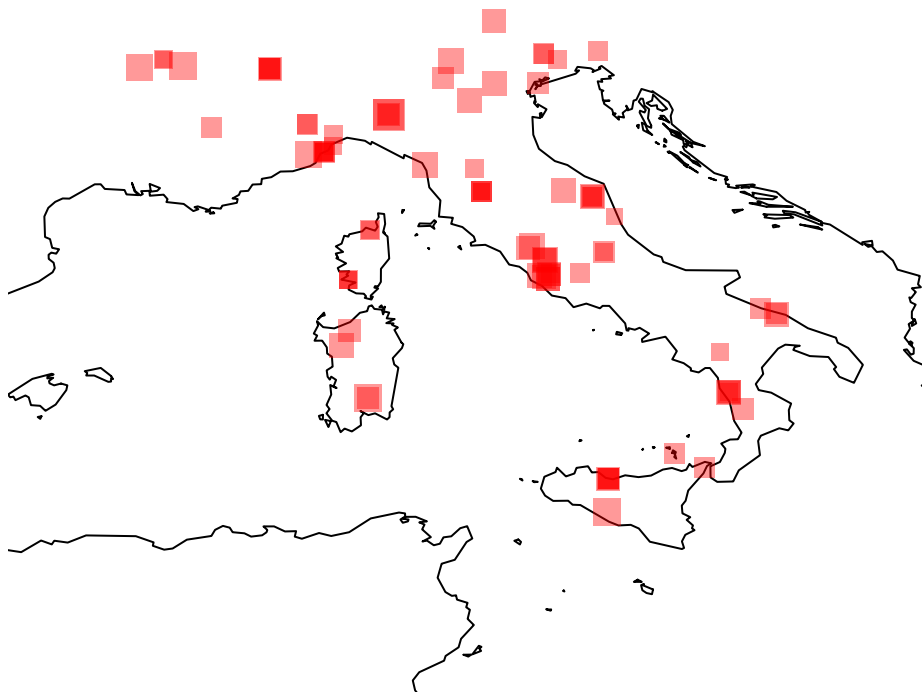

4150 cal. BC

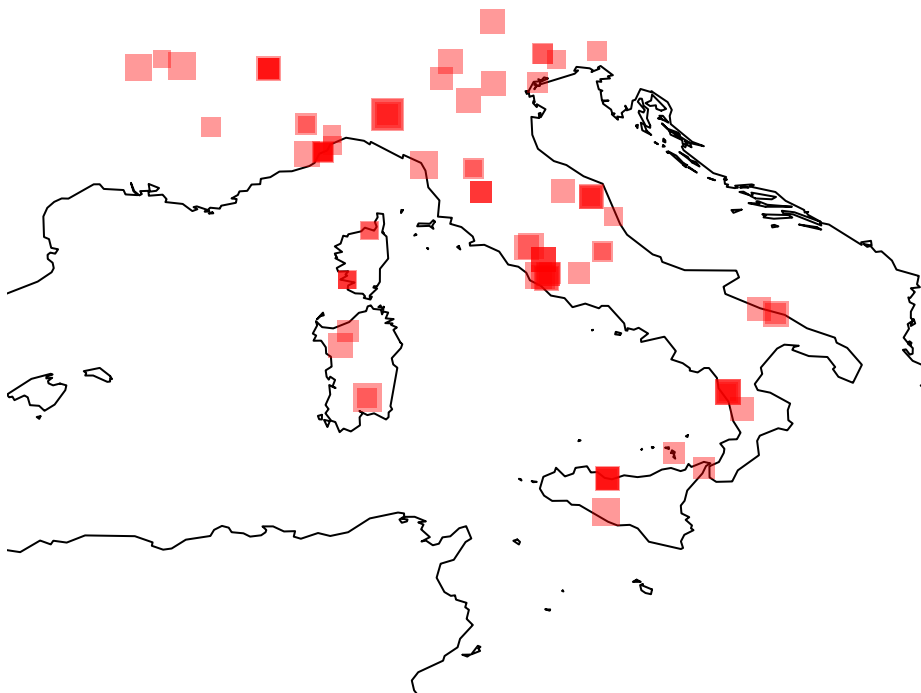

4145 cal. BC

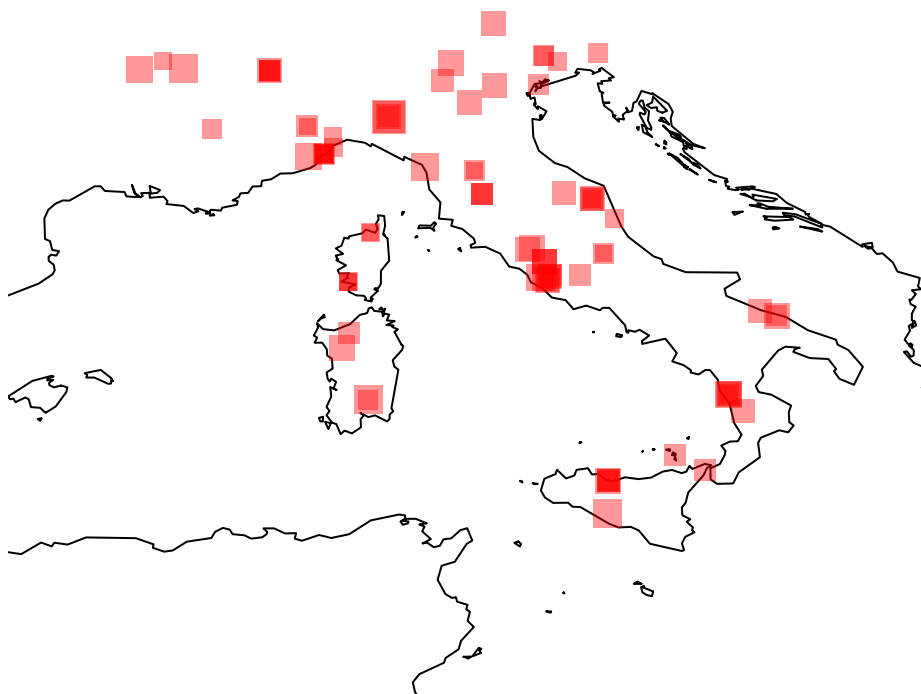

**4140 cal. BC**

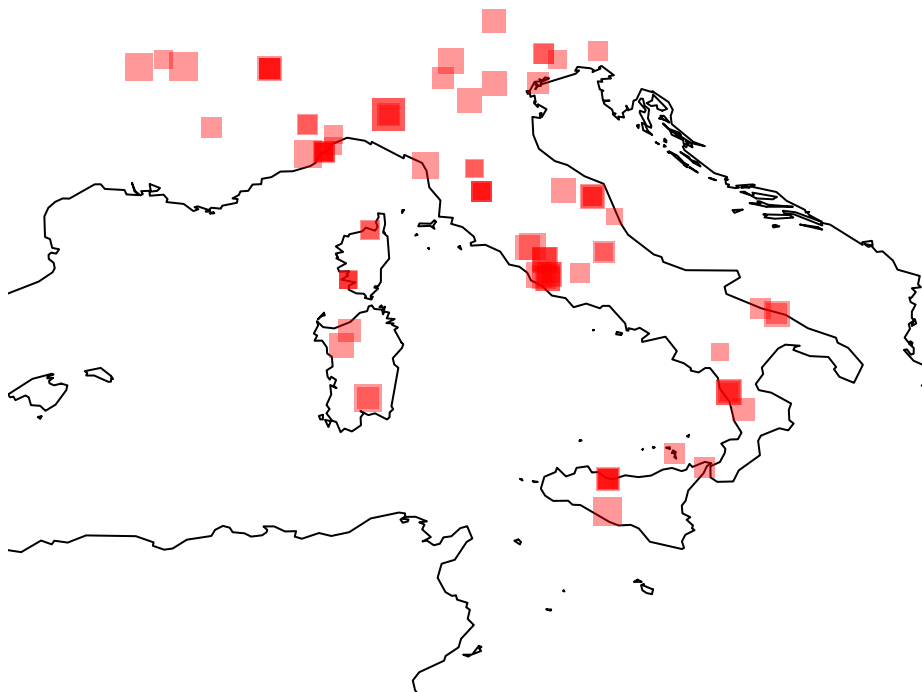

4135 cal. BC

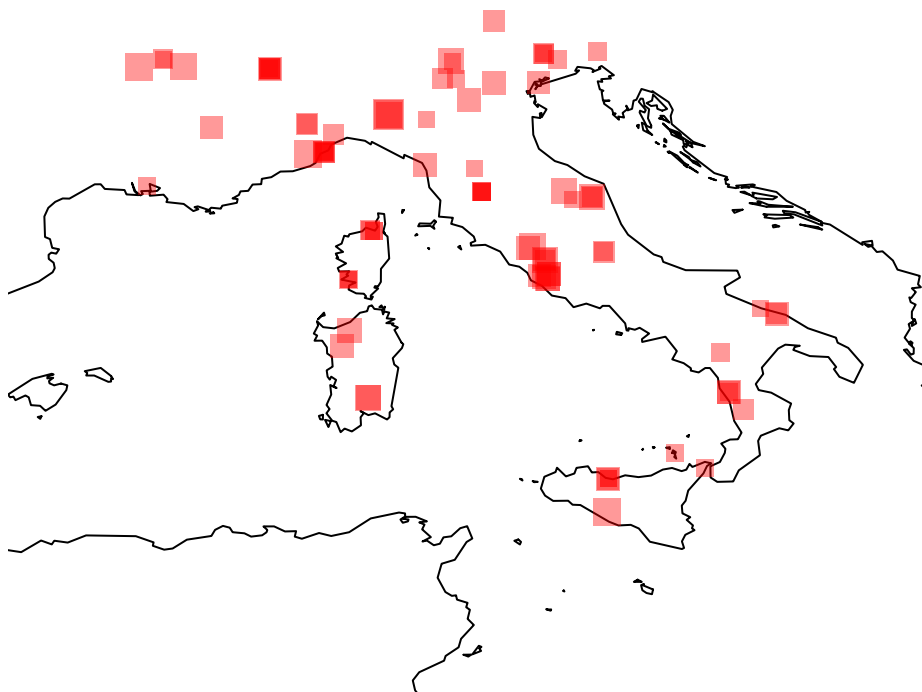

4130 cal. BC

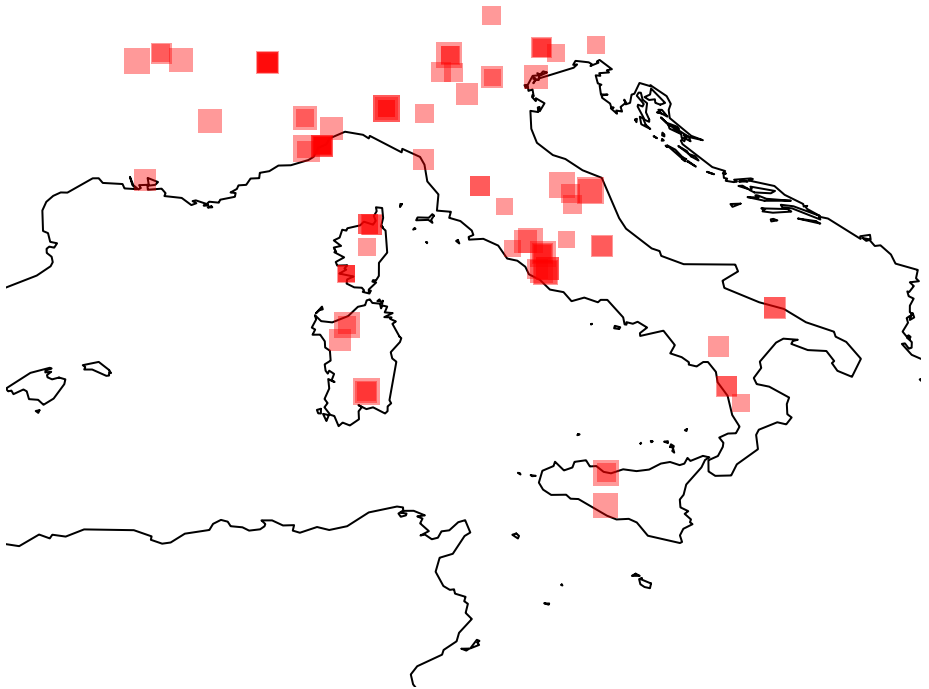



4125 cal. BC

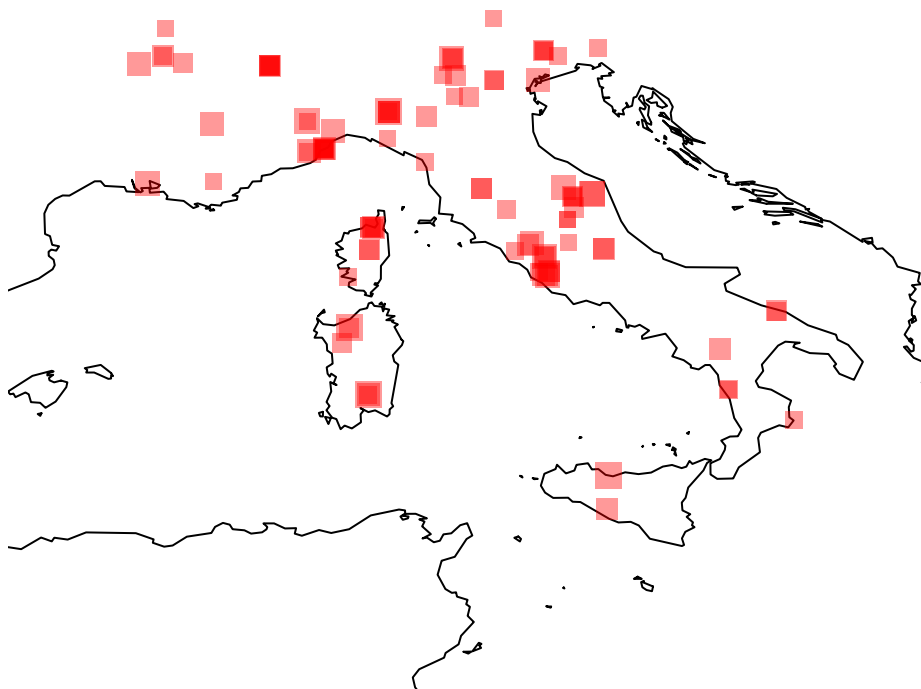

4120 cal. BC

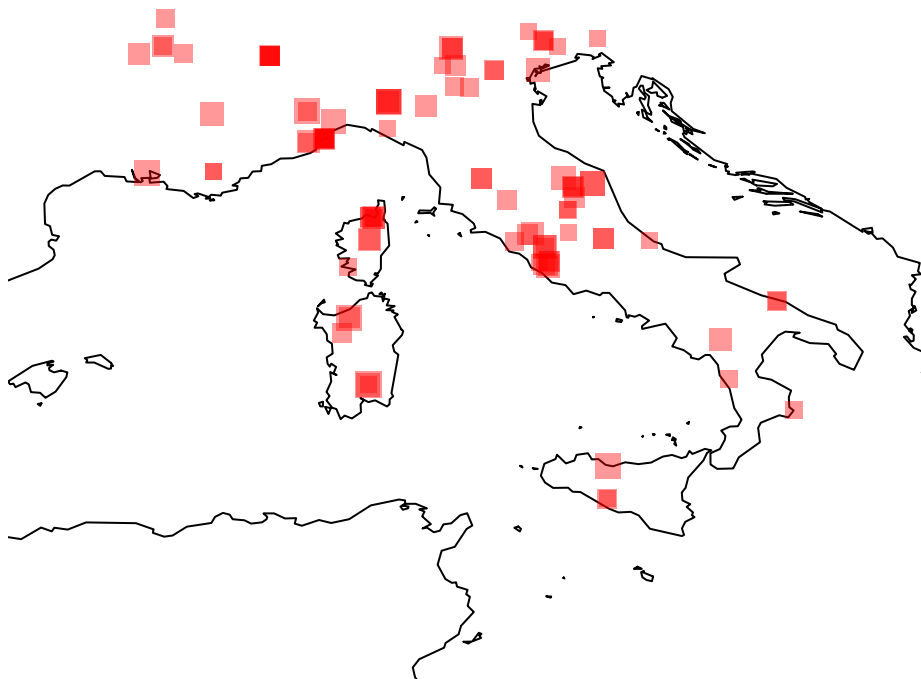

4115 cal. BC

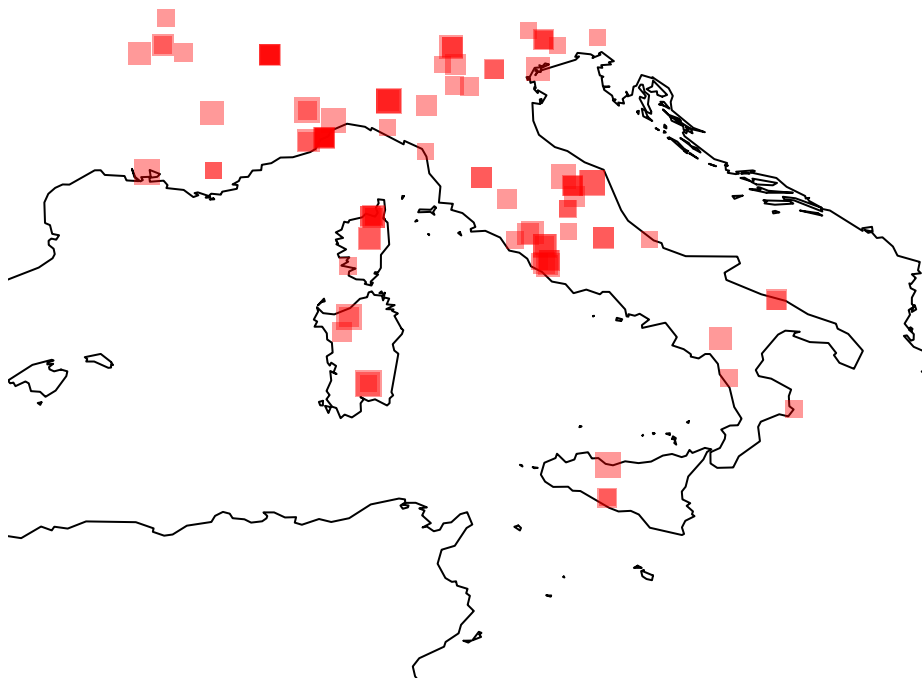

4110 cal. BC

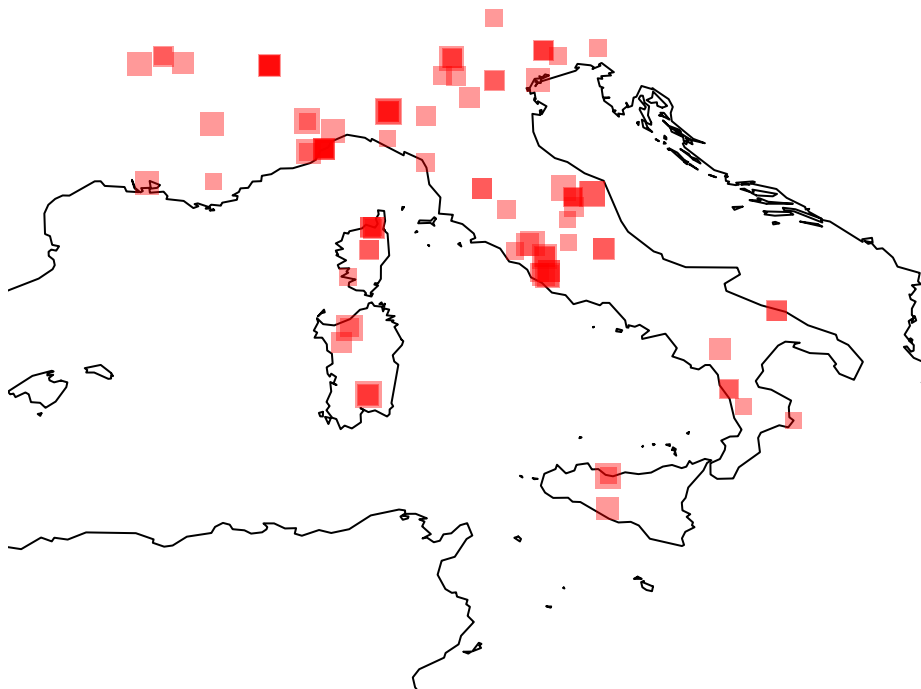

4105 cal. BC

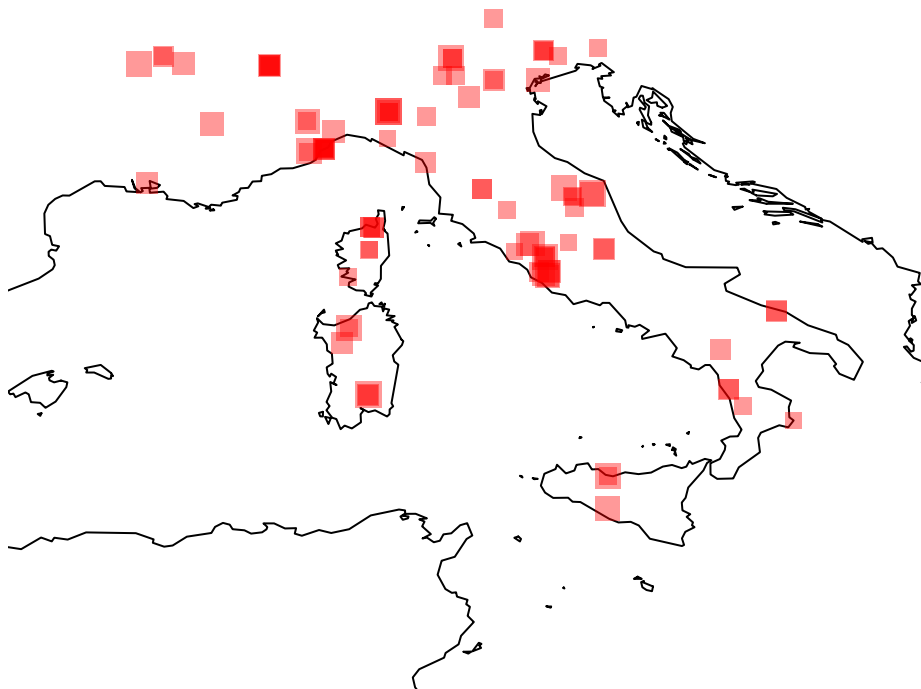

4100 cal. BC

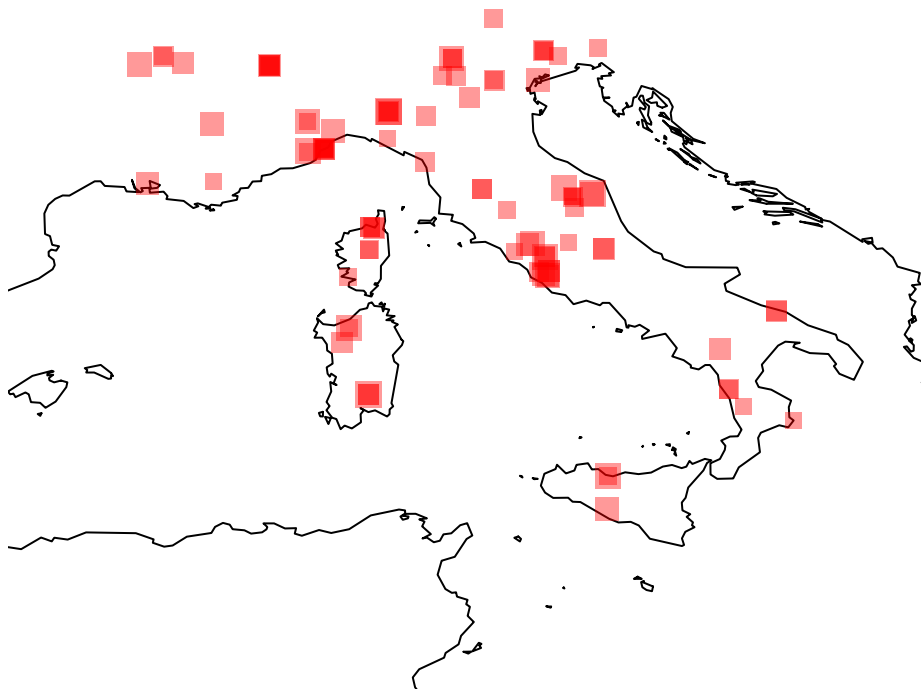

4095 cal. BC

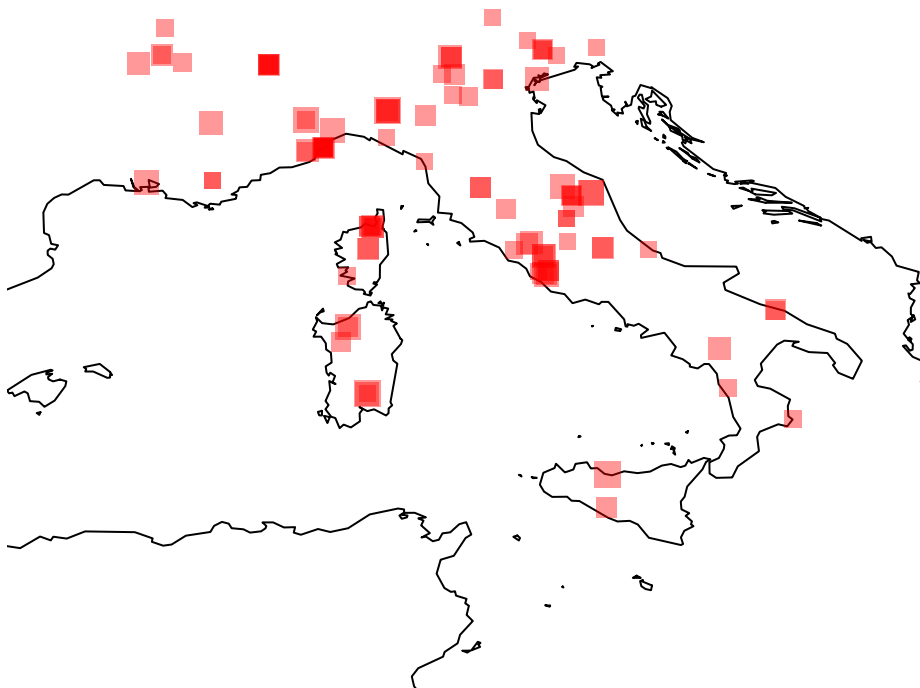

4090 cal. BC

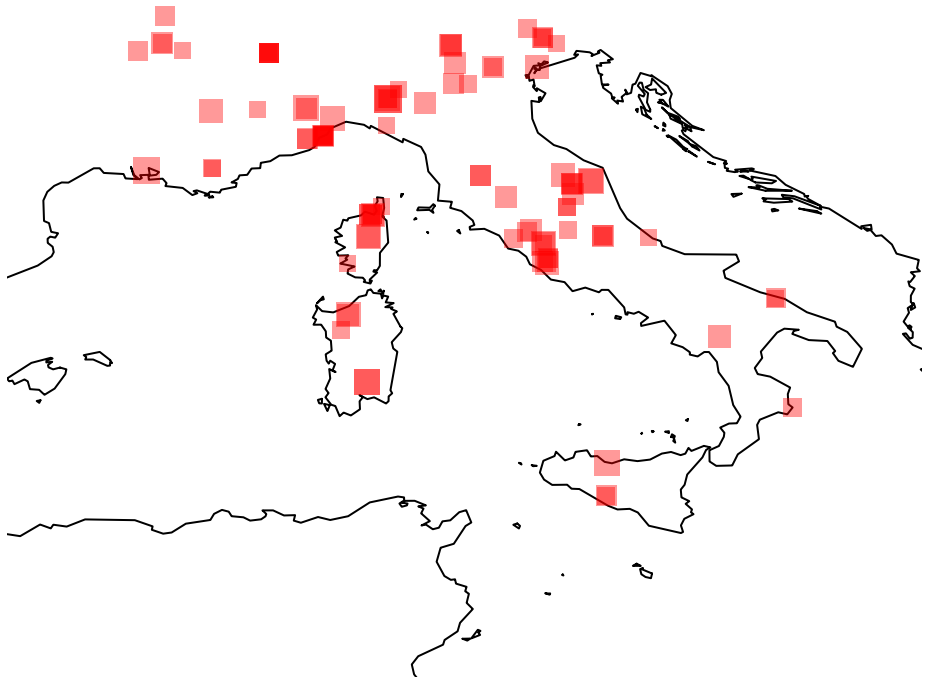



4085 cal. BC

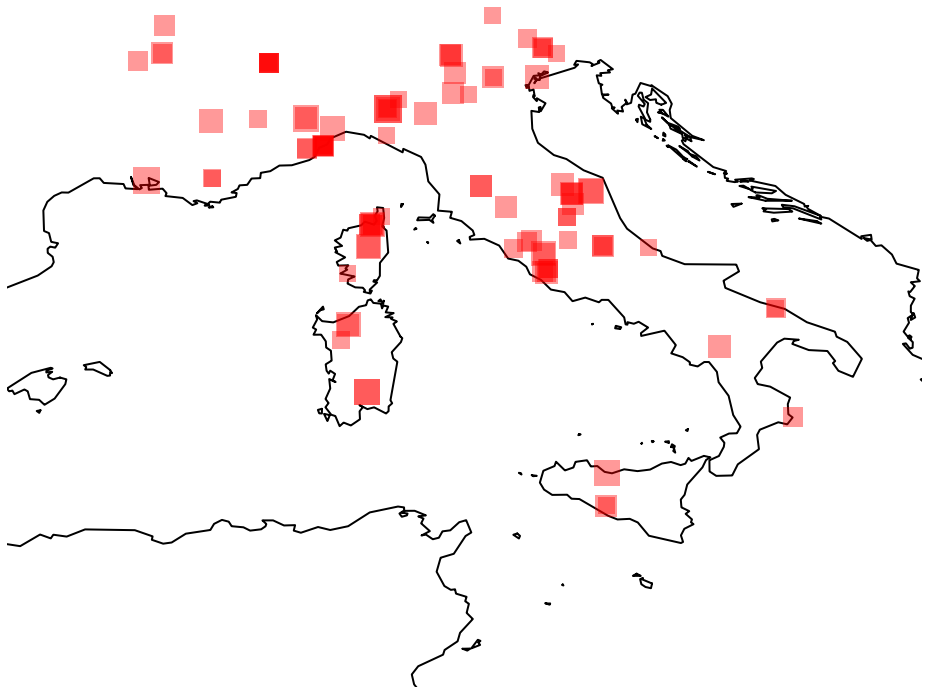

4080 cal. BC

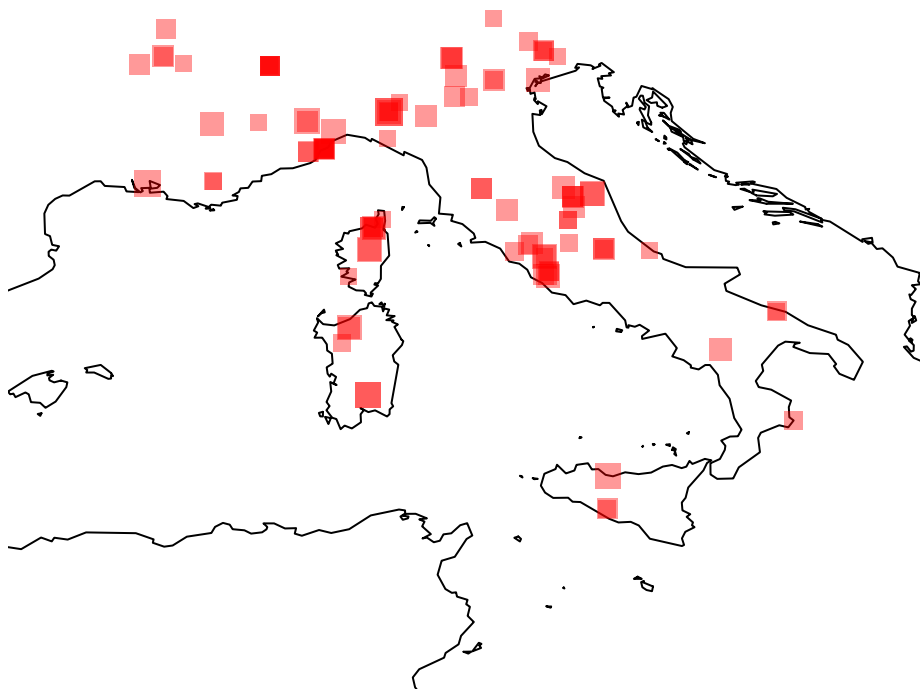

4075 cal. BC

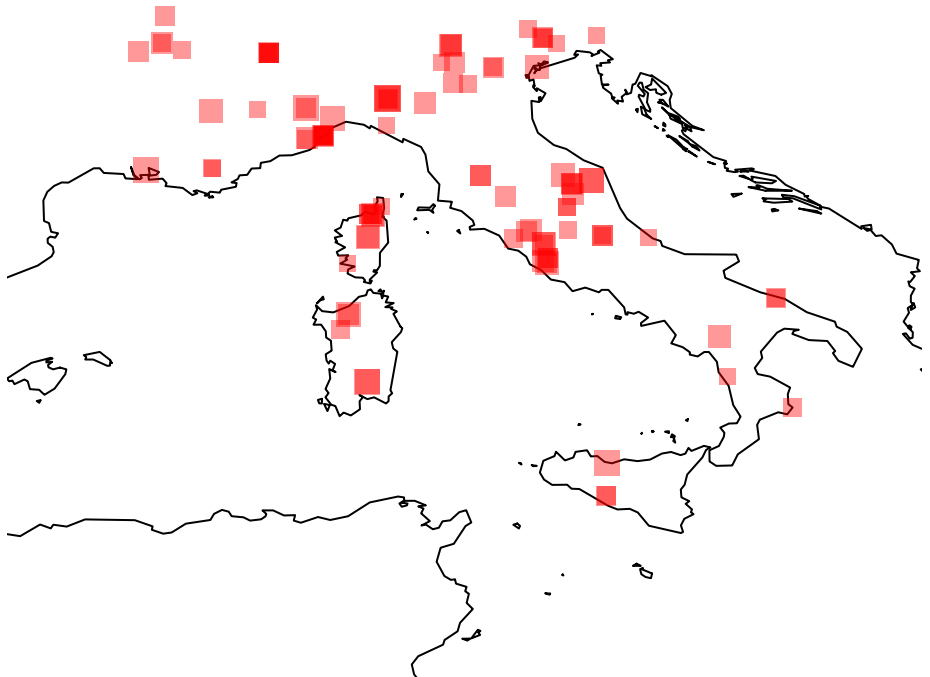

4070 cal. BC

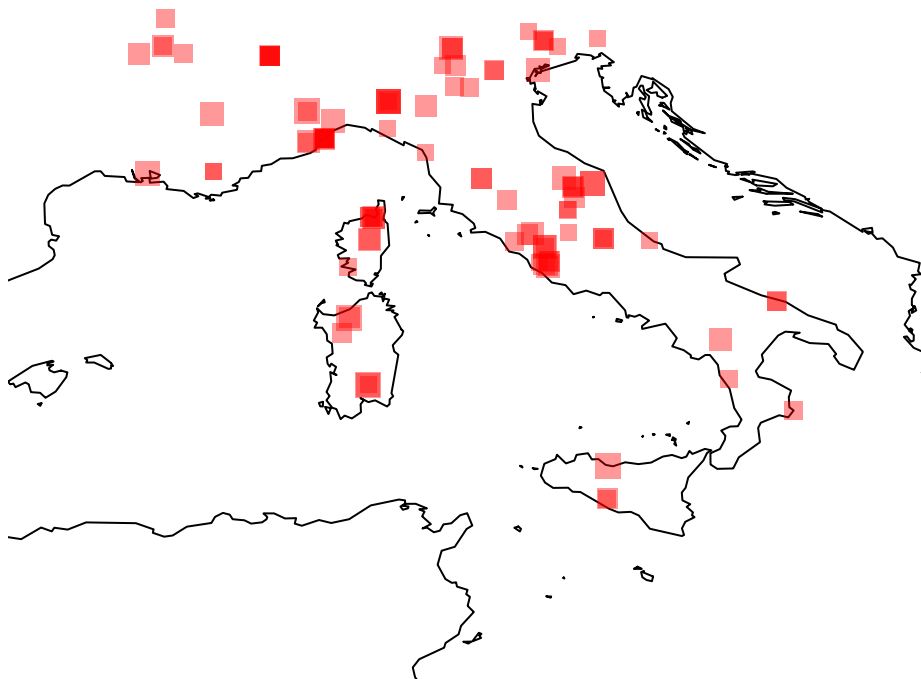

4065 cal. BC

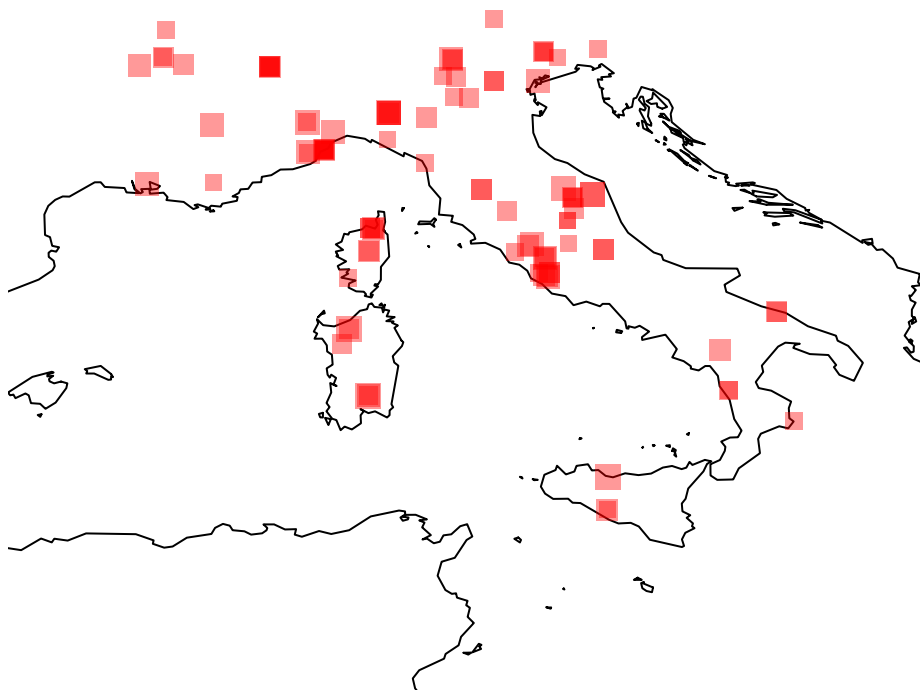

4060 cal. BC

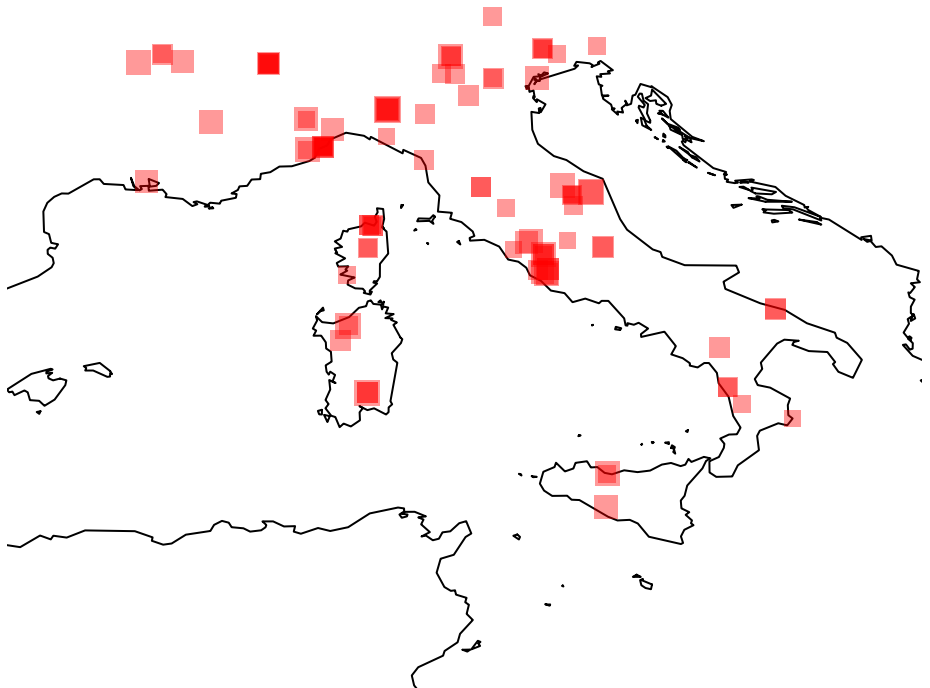

4055 cal. BC

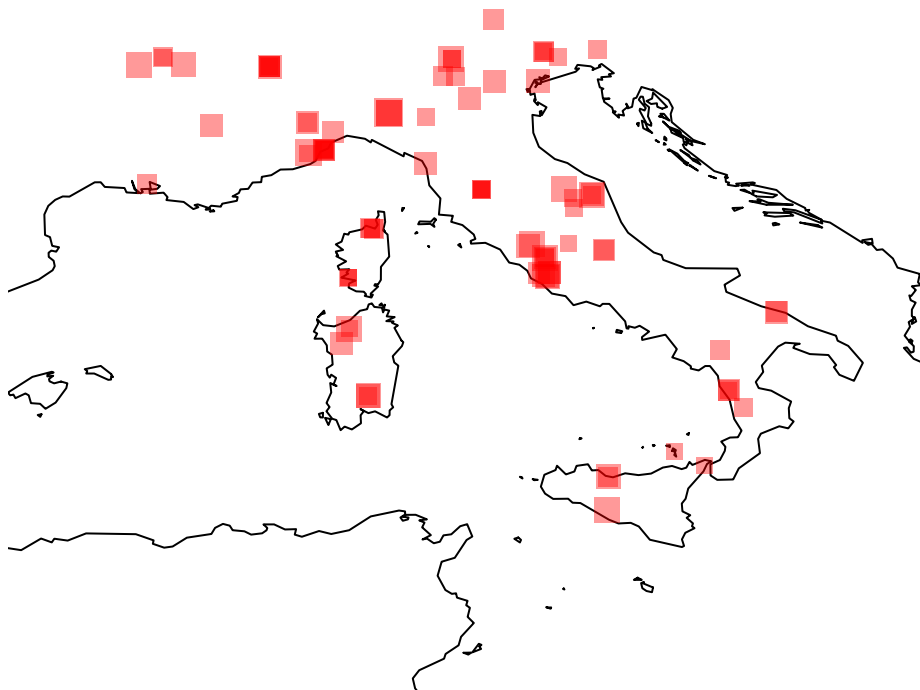

4050 cal. BC

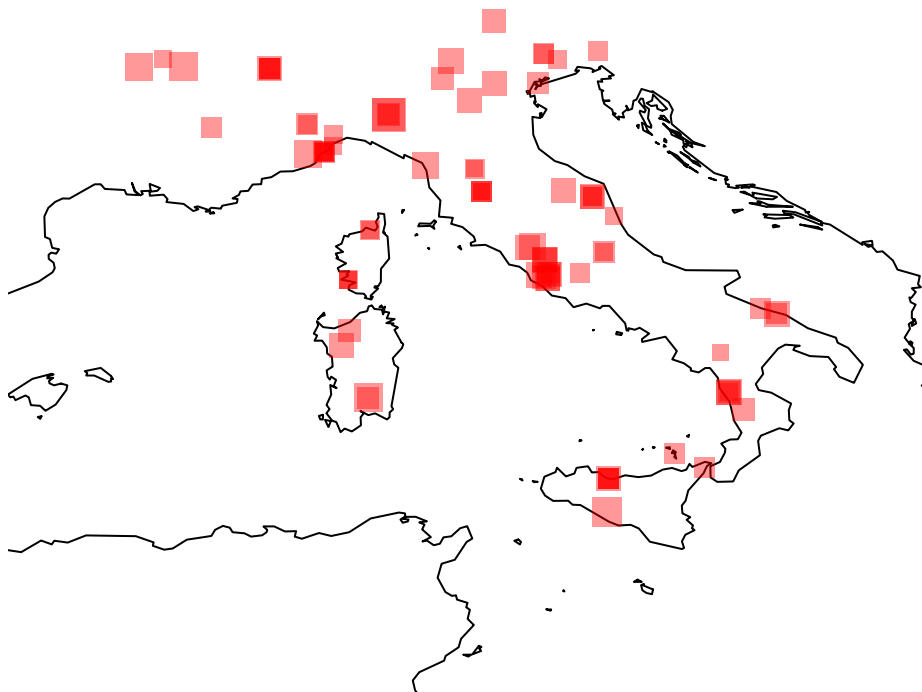



4045 cal. BC

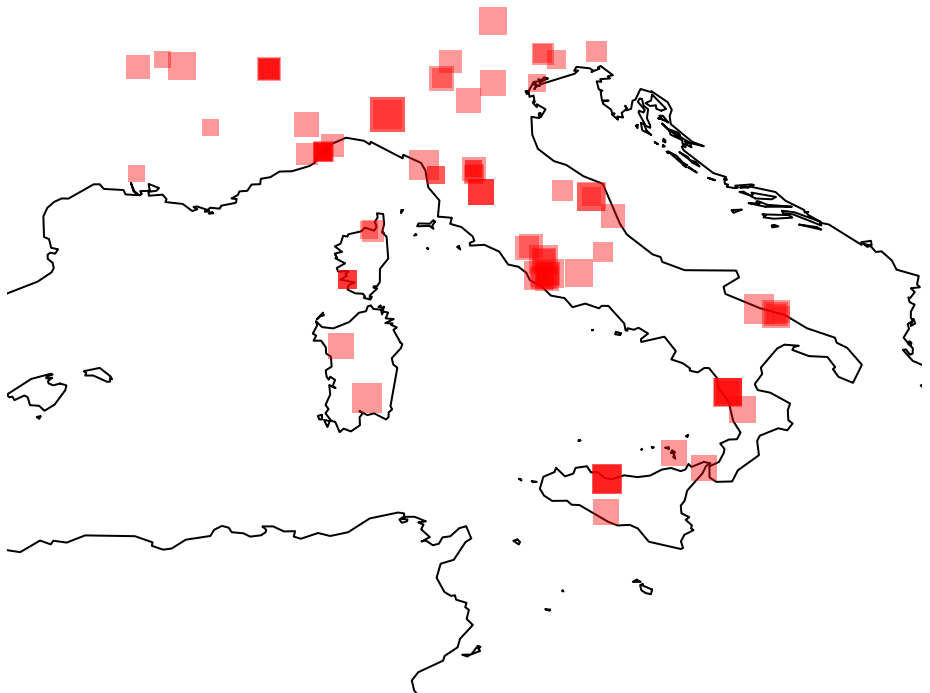

**4040 cal. BC**

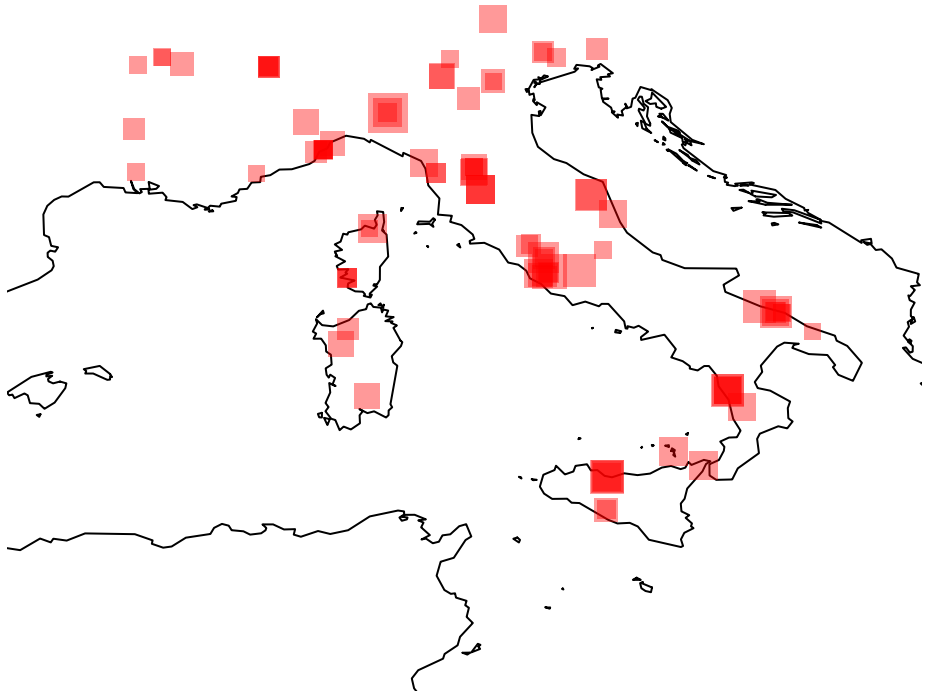

4035 cal. BC

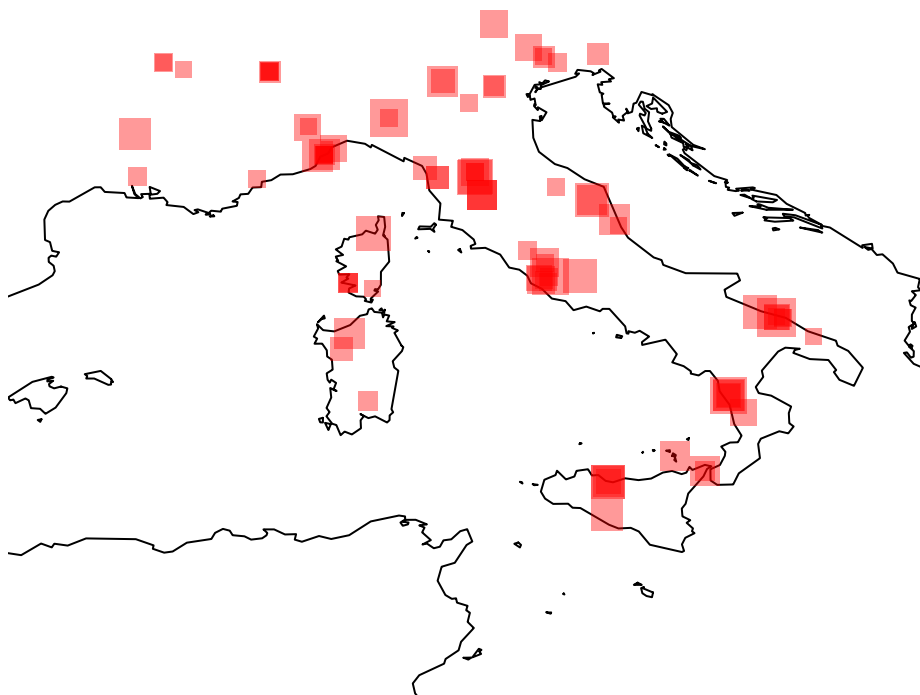

4030 cal. BC

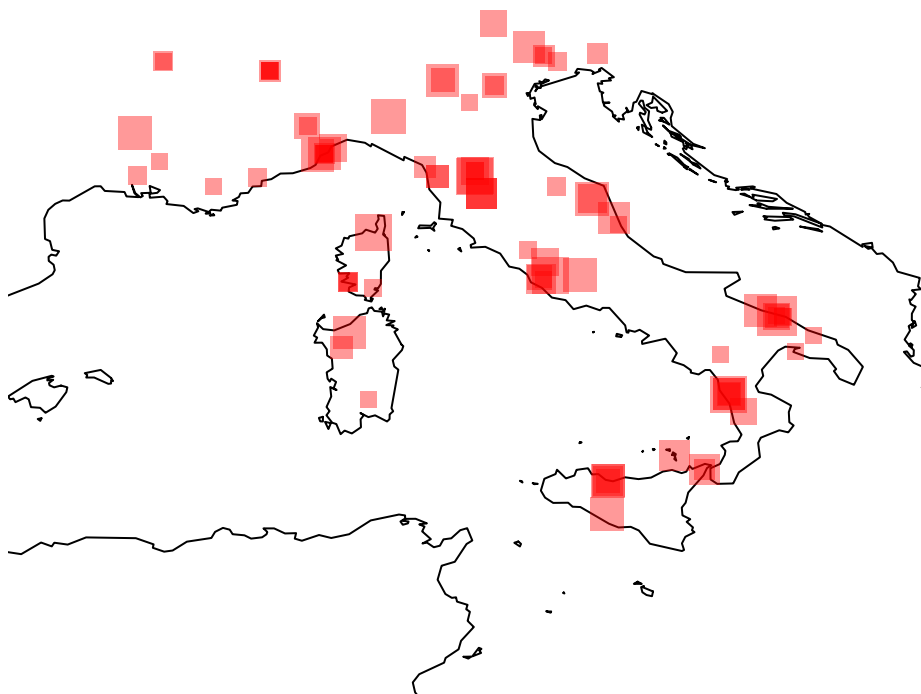

4025 cal. BC

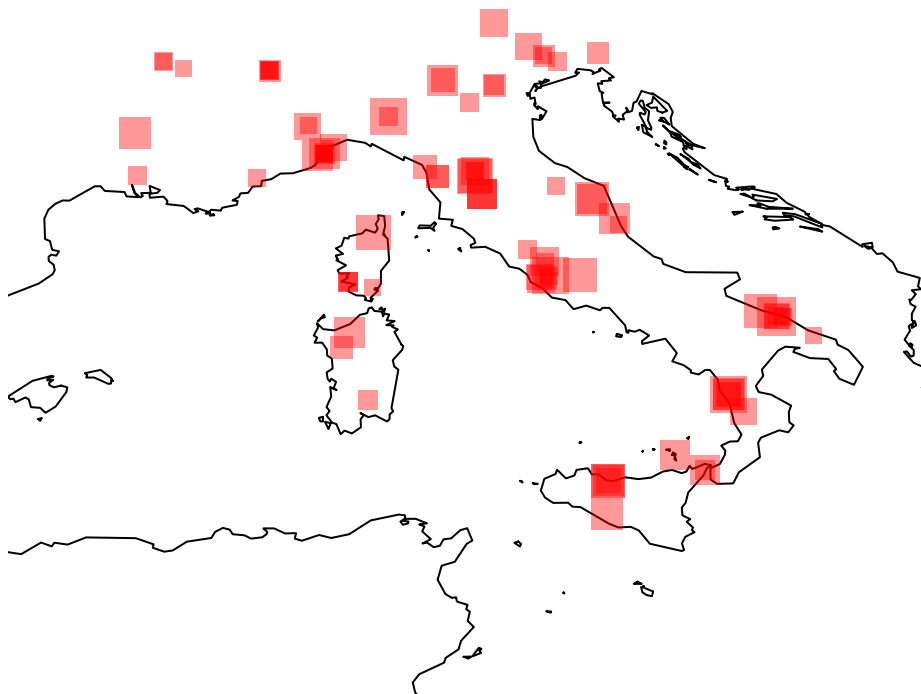

4020 cal. BC

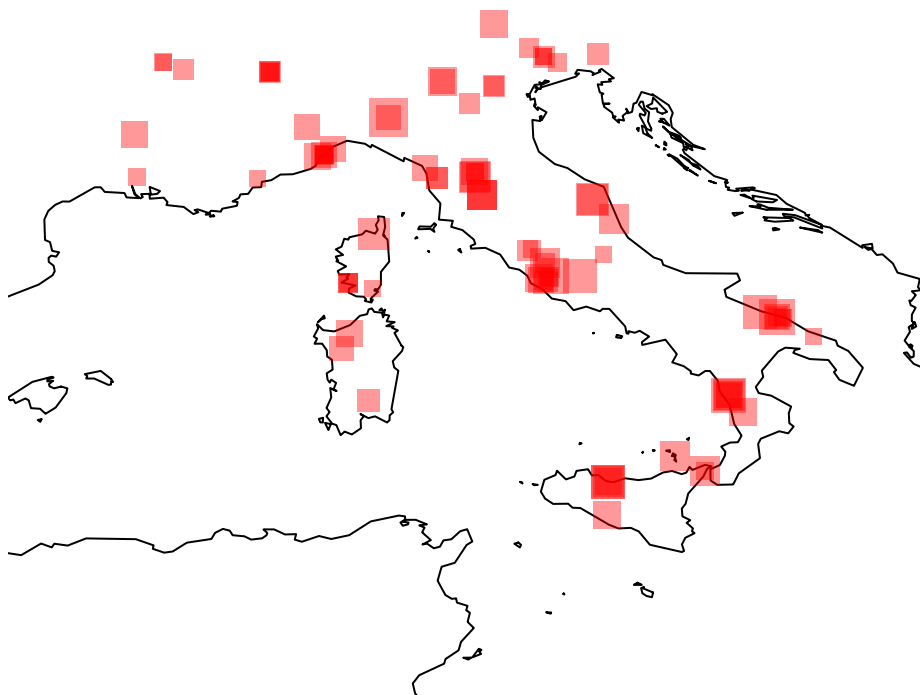

4015 cal. BC

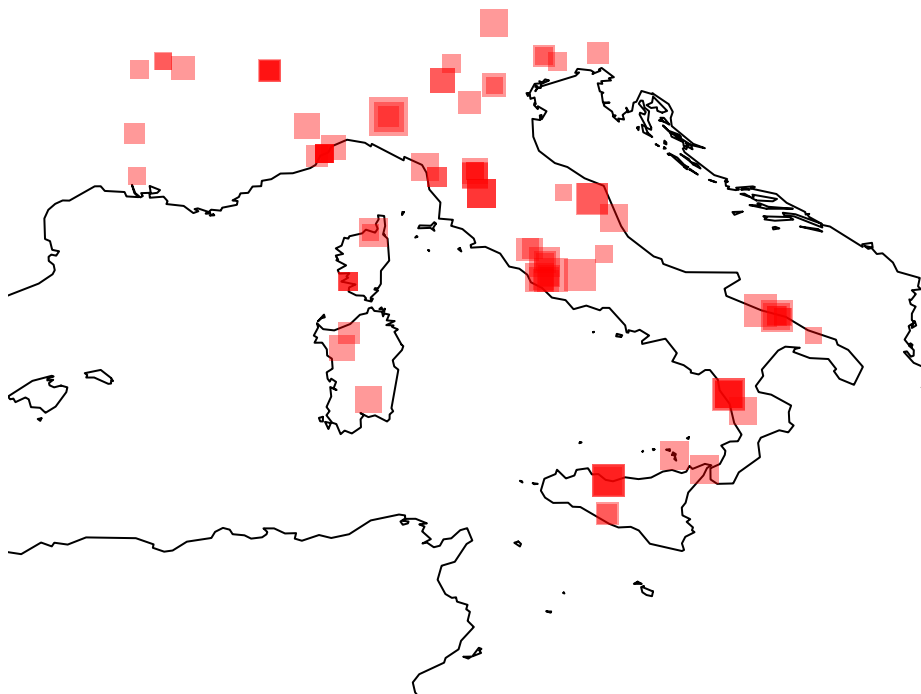

4010 cal. BC

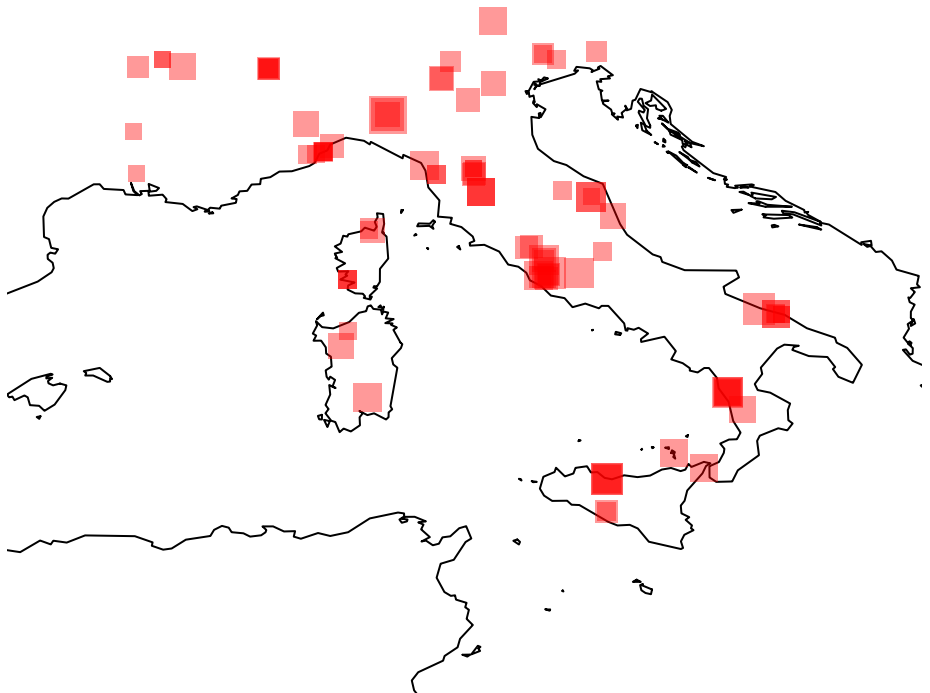



4005 cal. BC

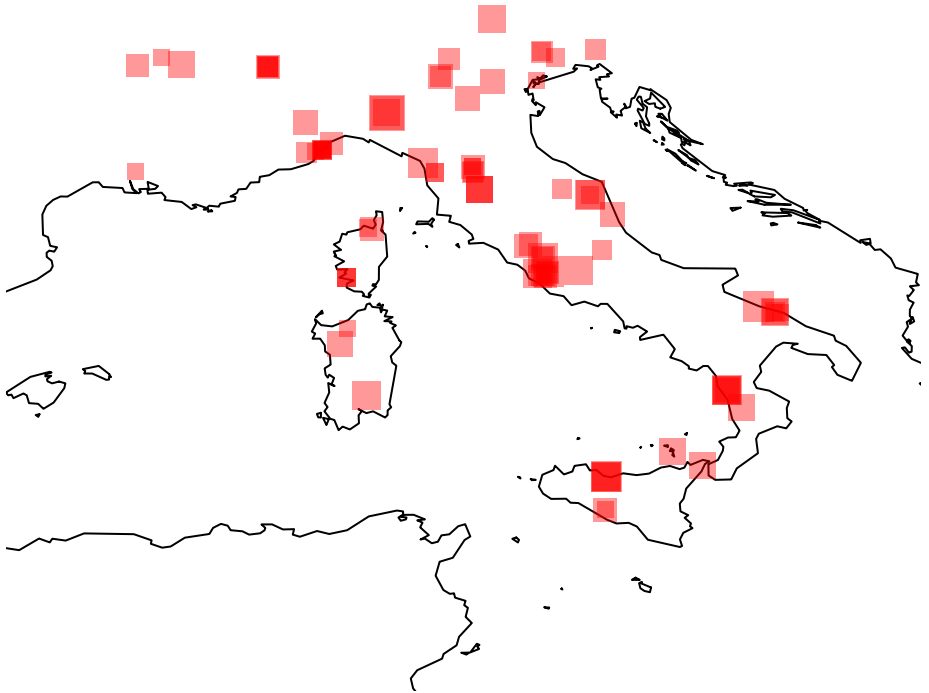

4000 cal. BC

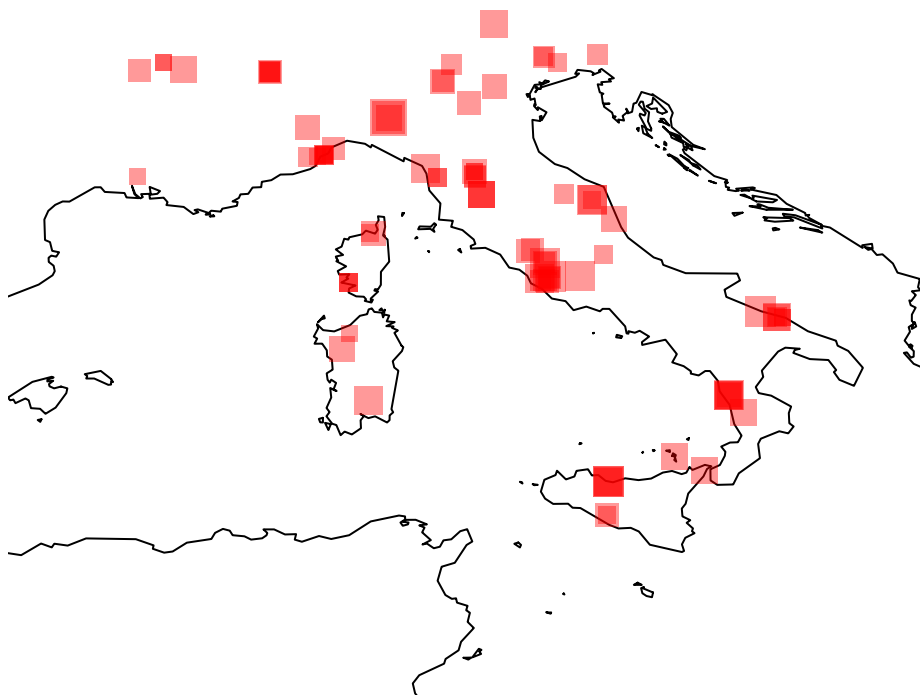

3995 cal. BC

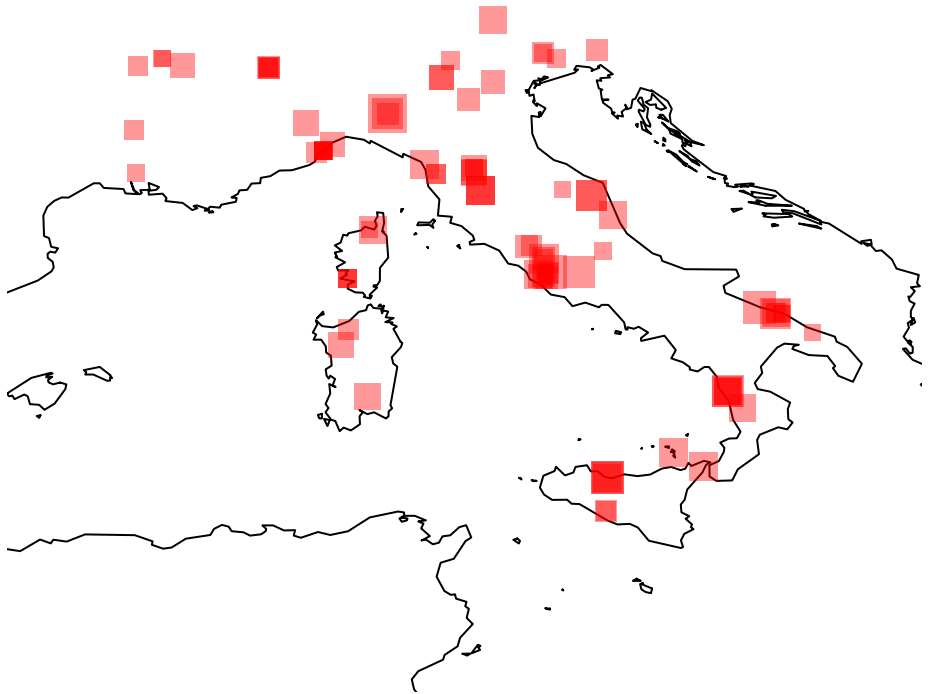

3990 cal. BC

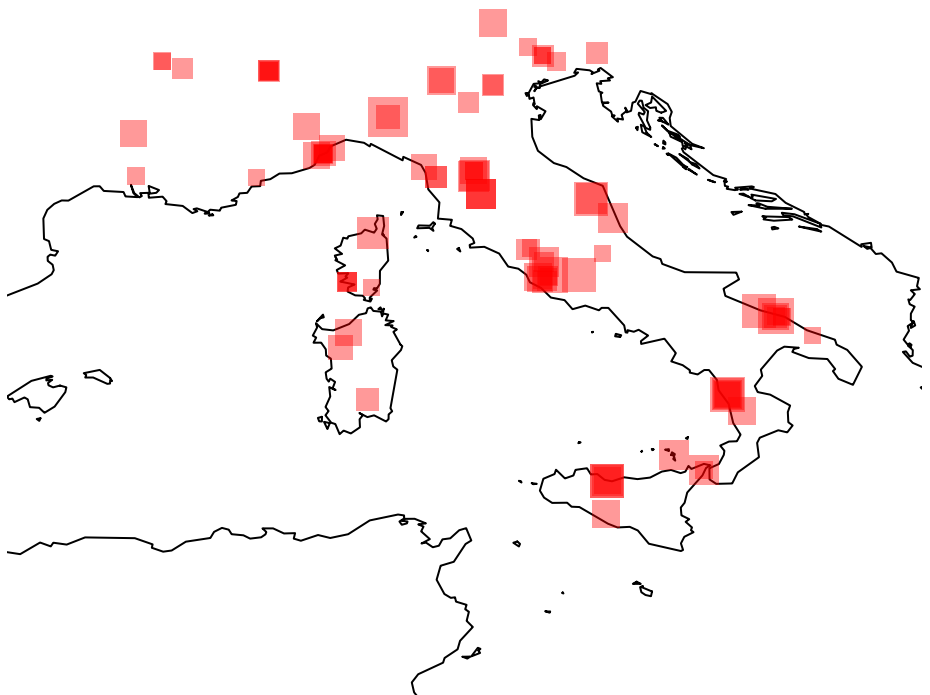

3985 cal. BC

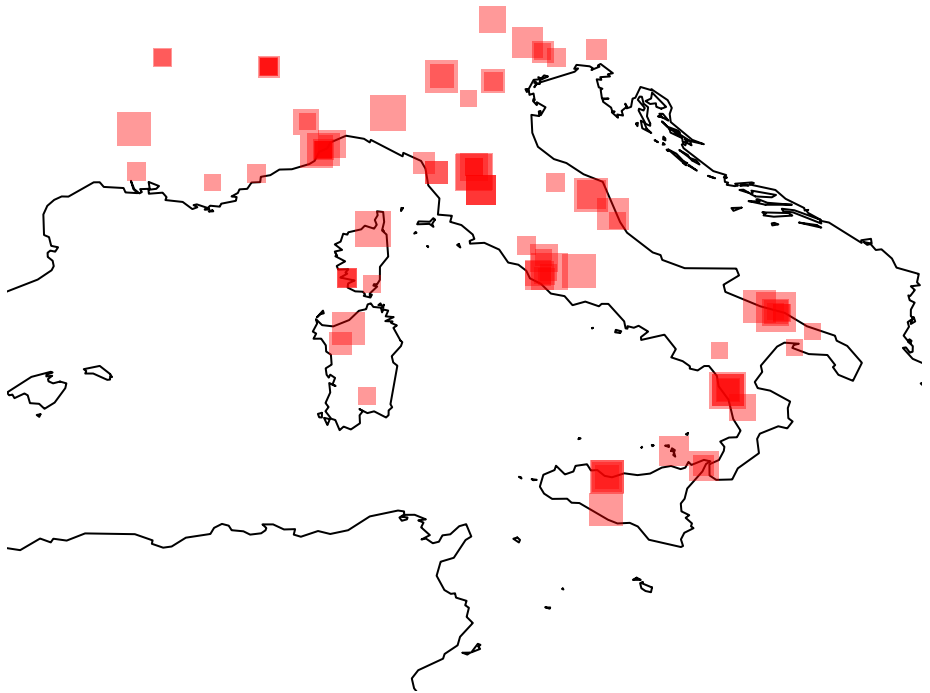

3980 cal. BC

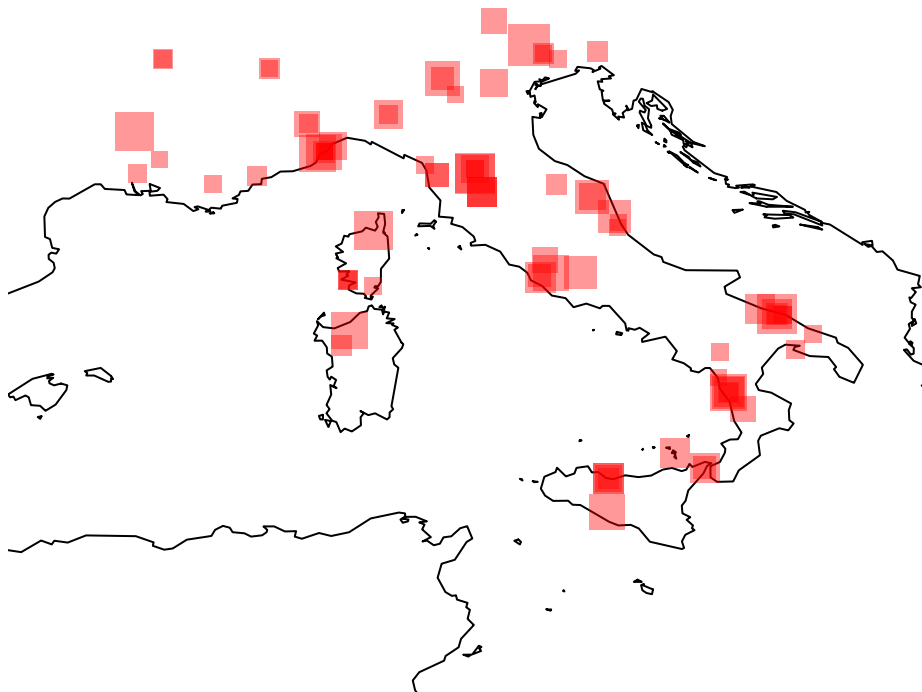

3975 cal. BC

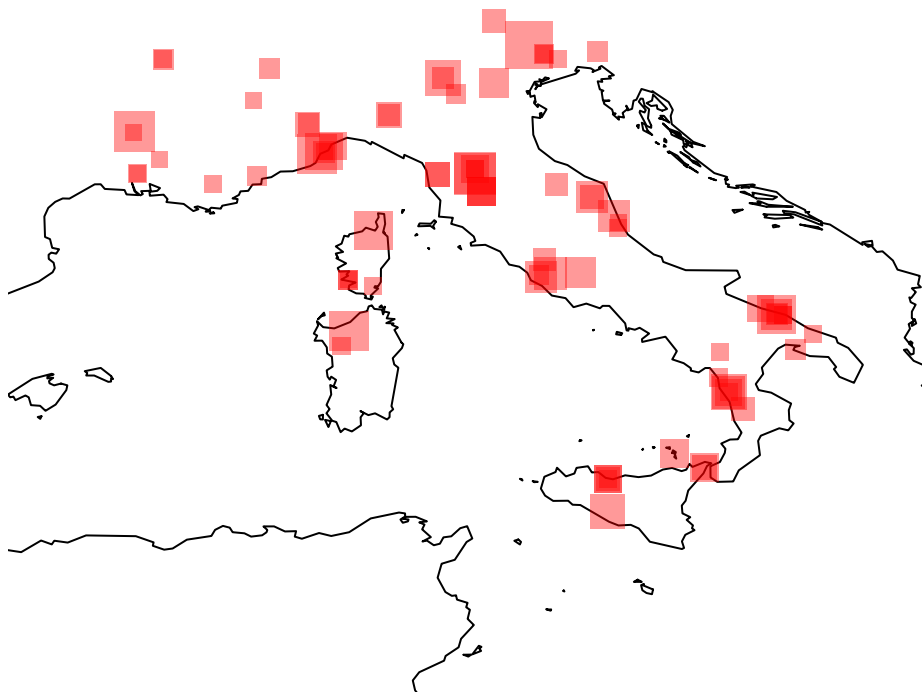

3970 cal. BC

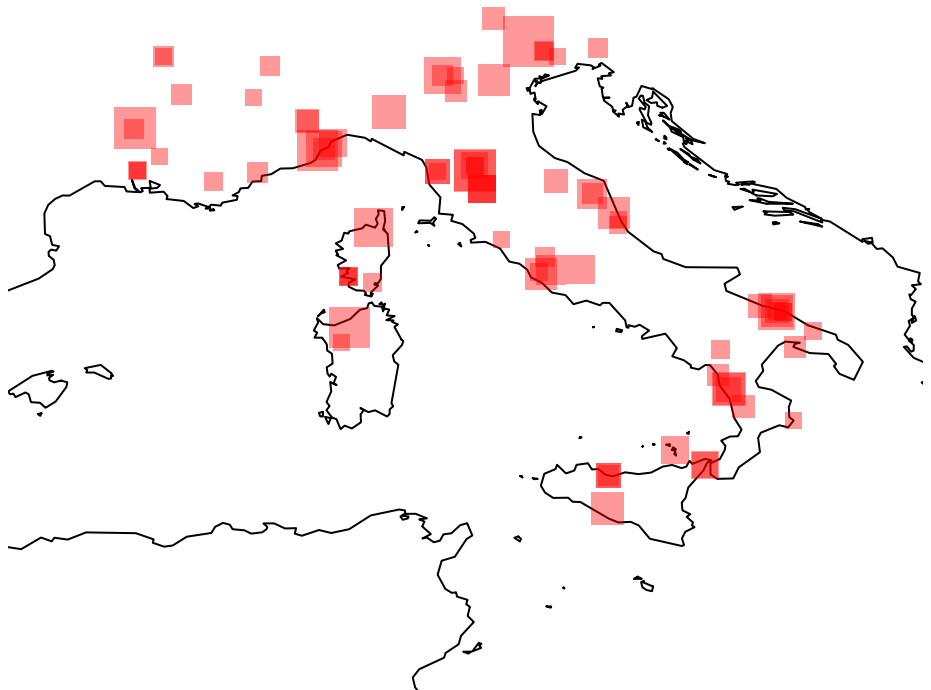



3965 cal. BC

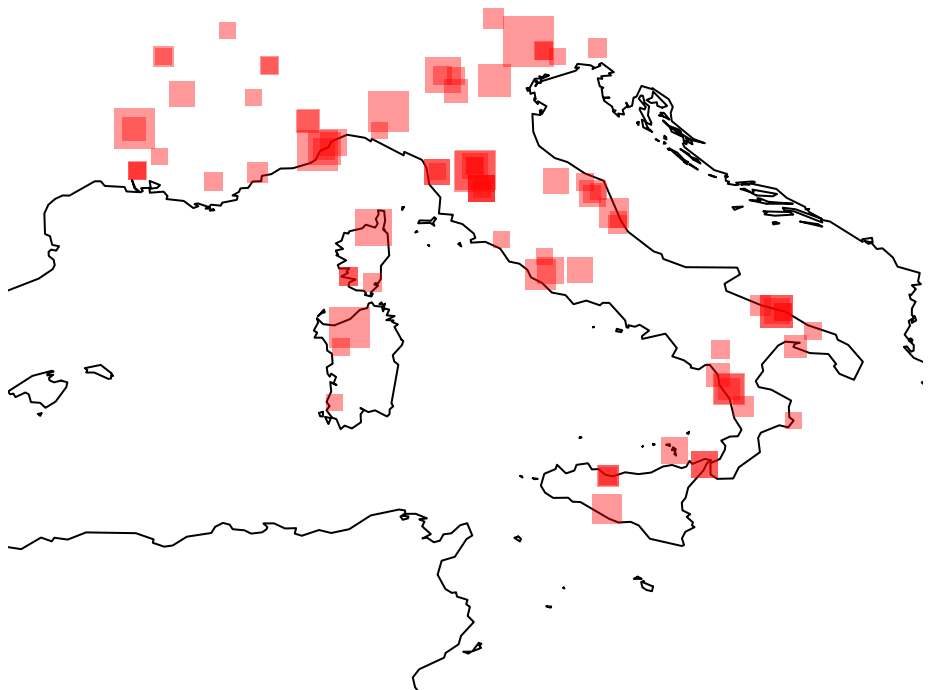

3960 cal. BC

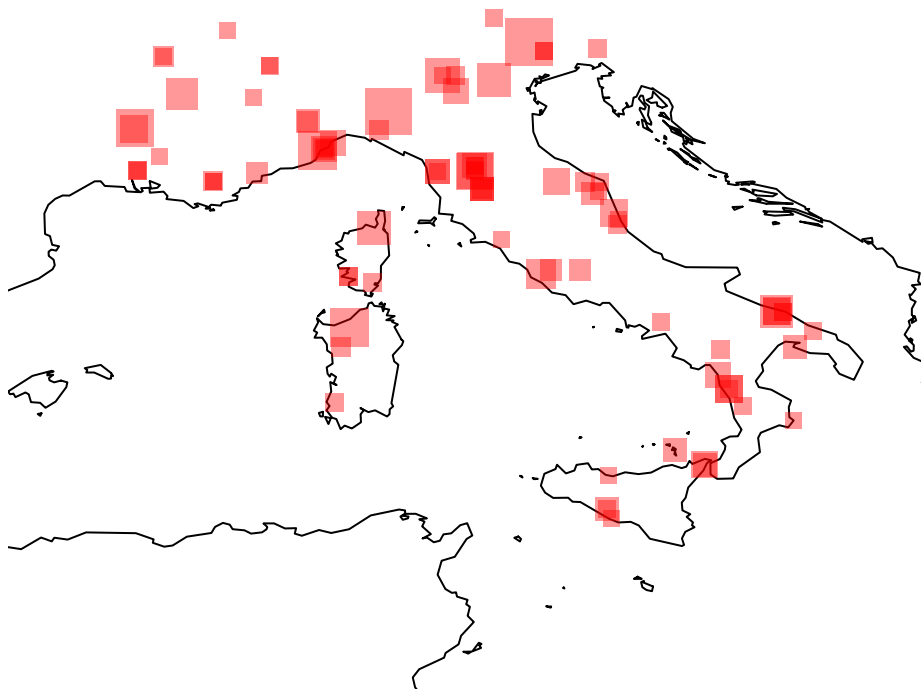

3955 cal. BC

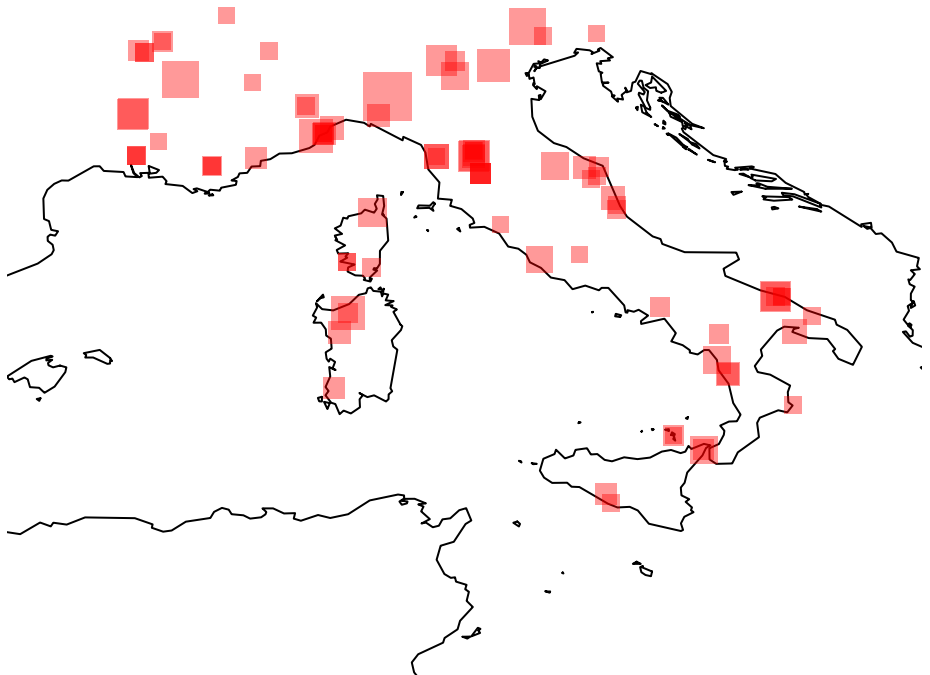

3950 cal. BC

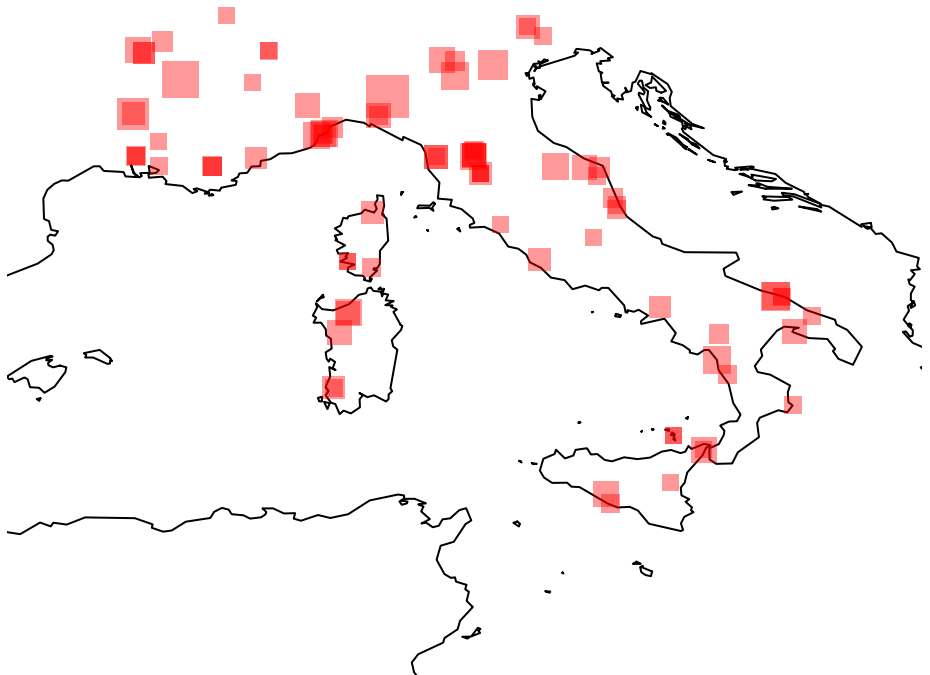

3945 cal. BC

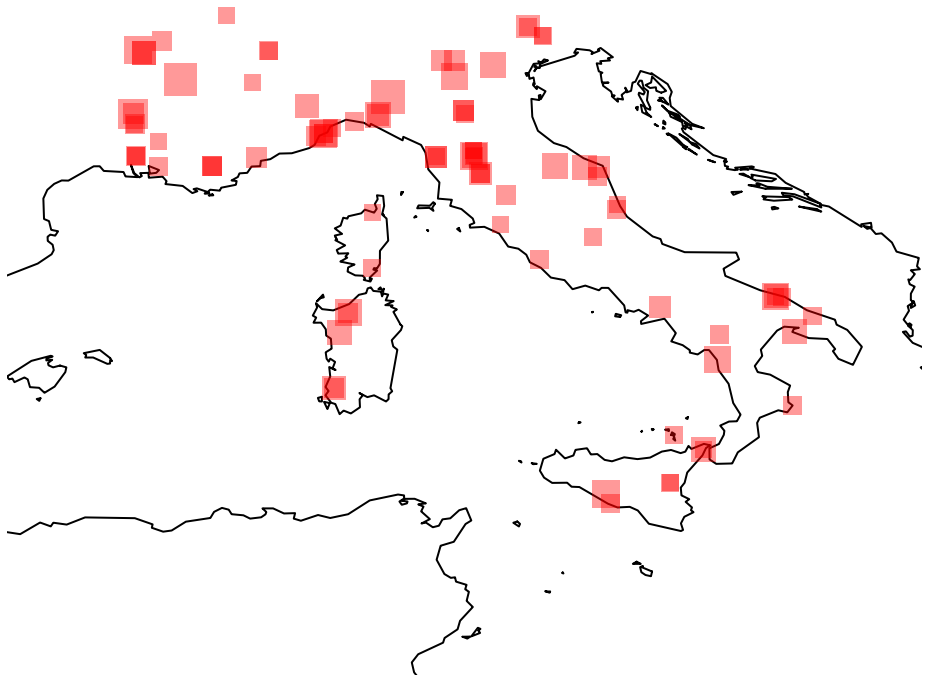

3940 cal. BC

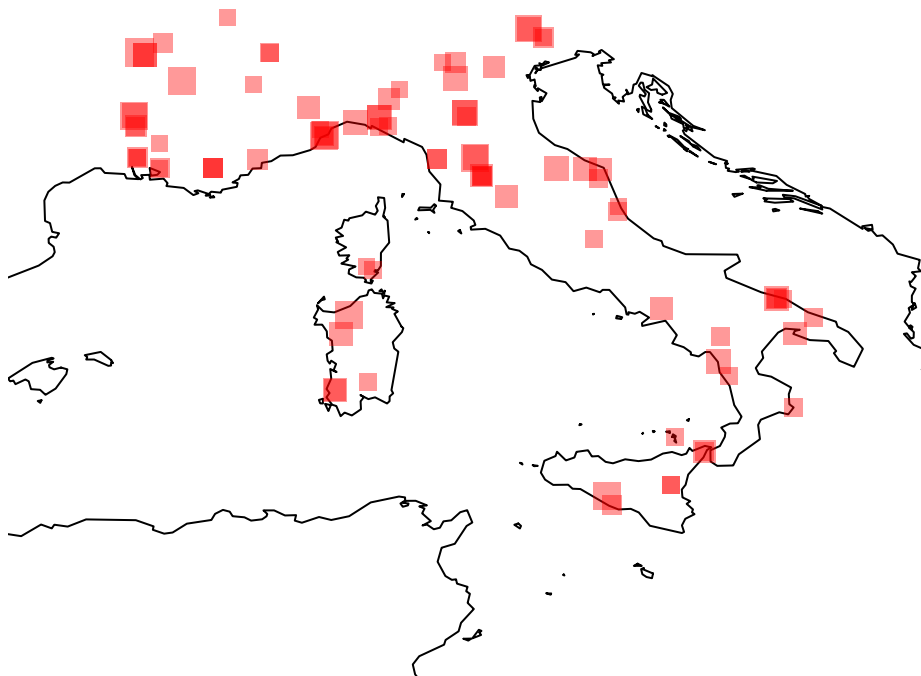

3935 cal. BC

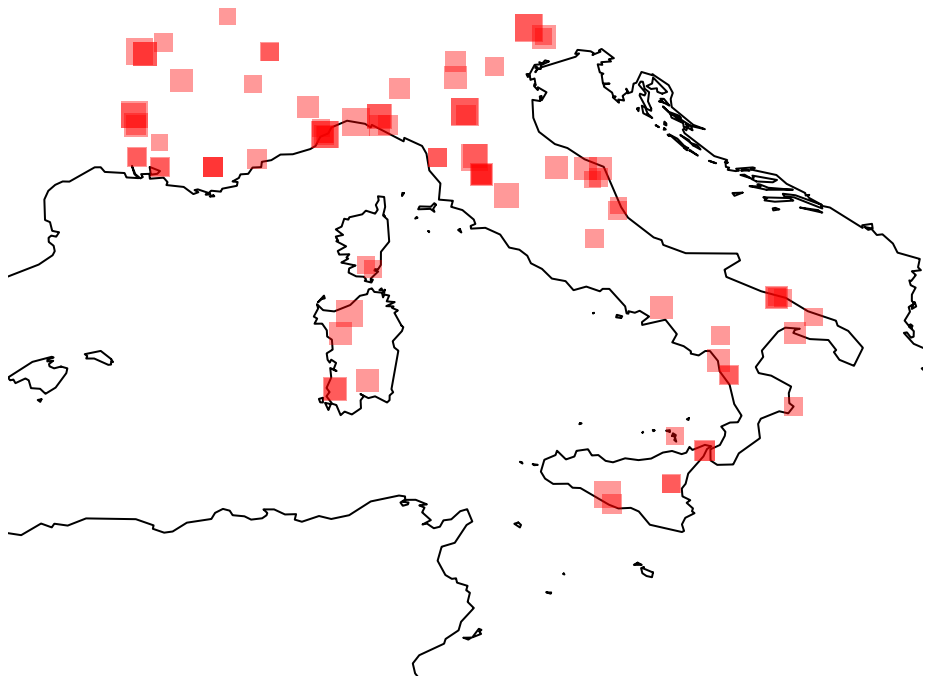

3930 cal. BC

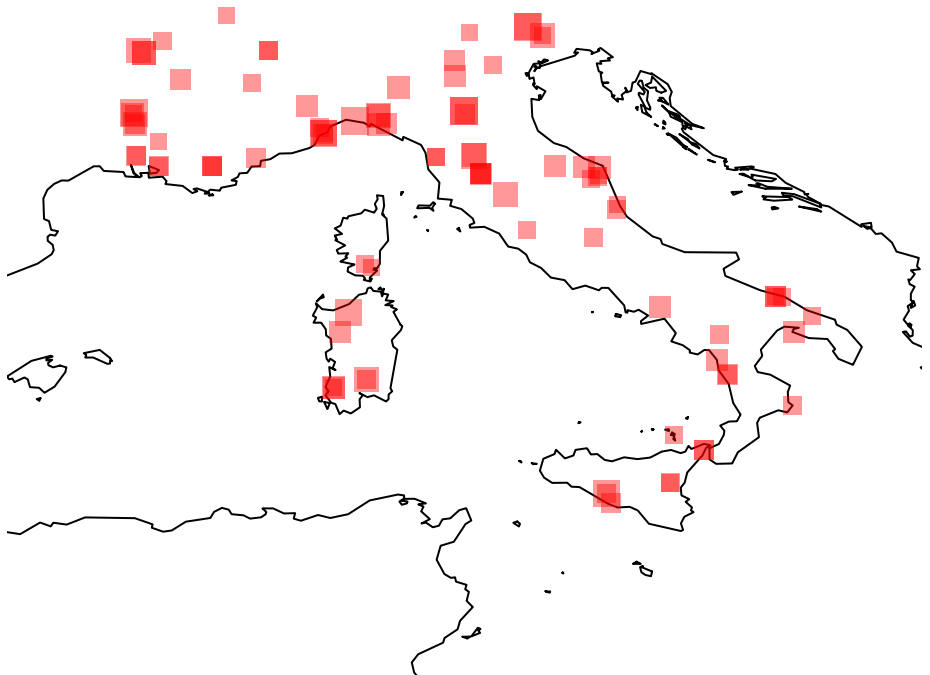



3925 cal. BC

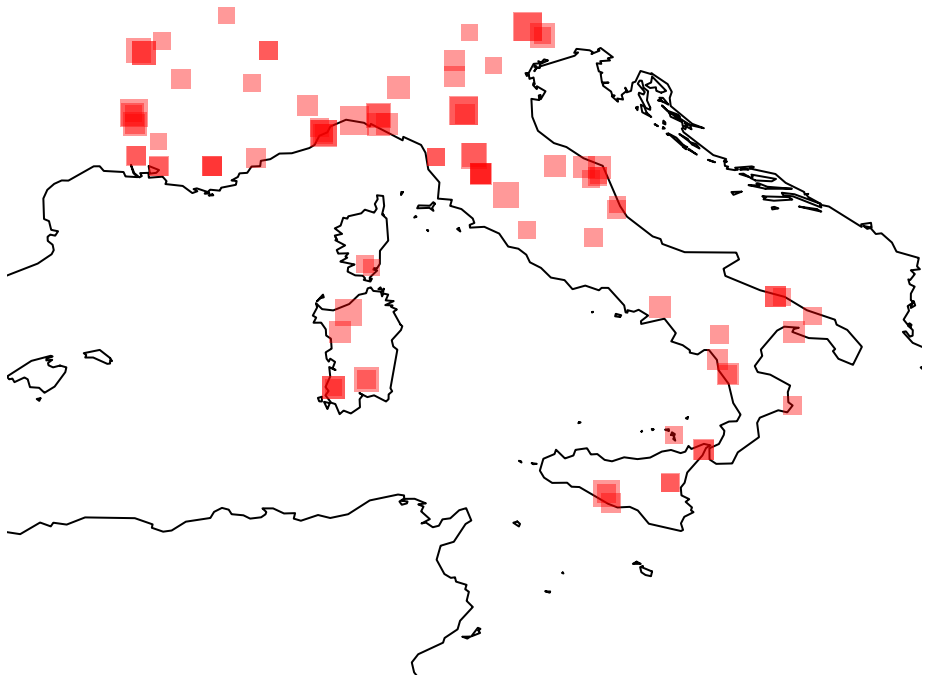

3920 cal. BC

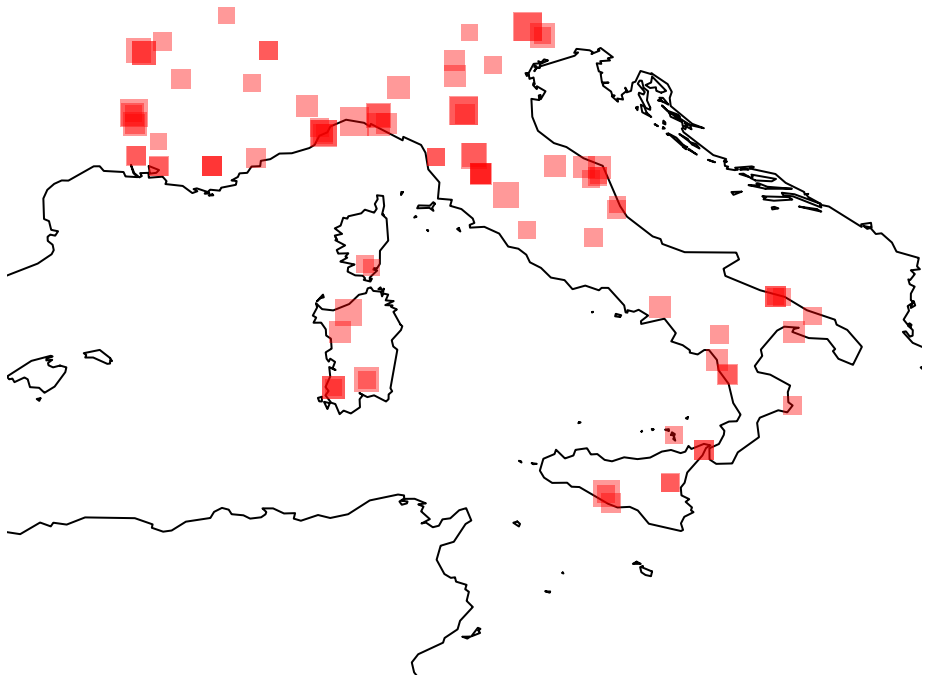

3915 cal. BC



3910 cal. BC

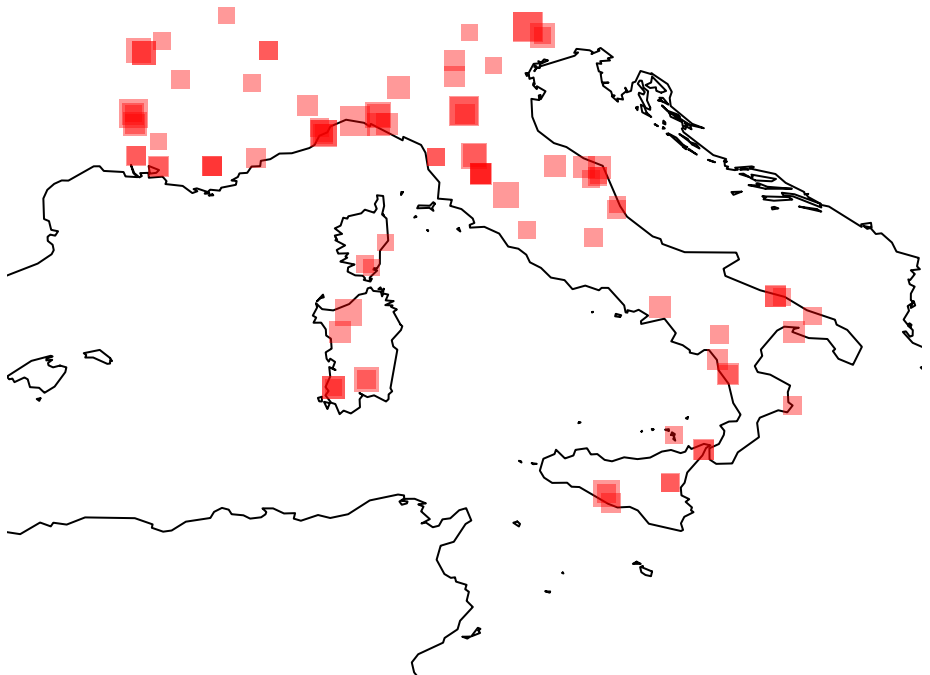

3905 cal. BC

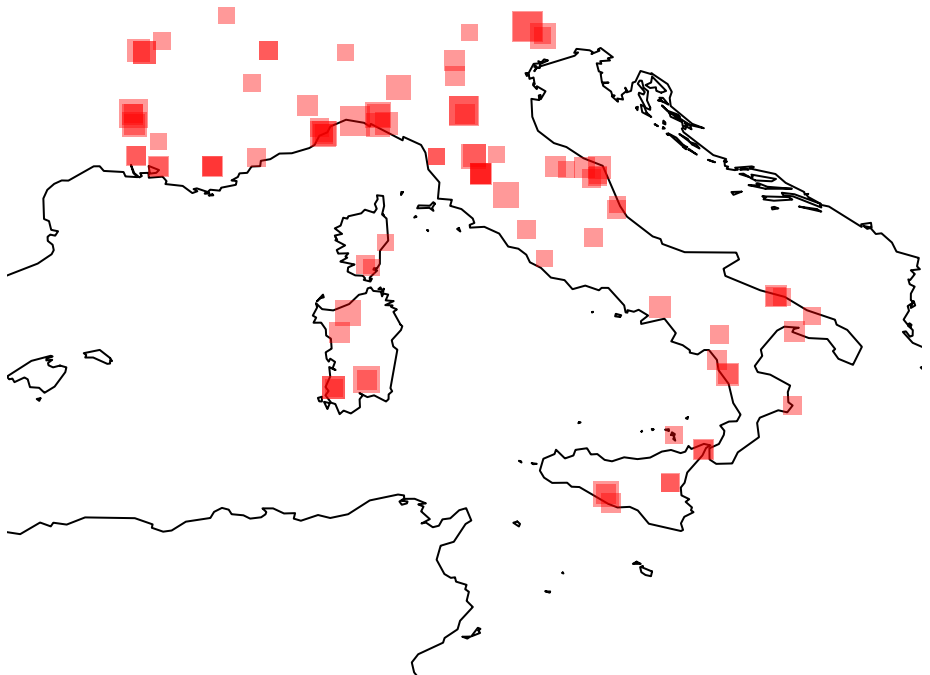

3900 cal. BC

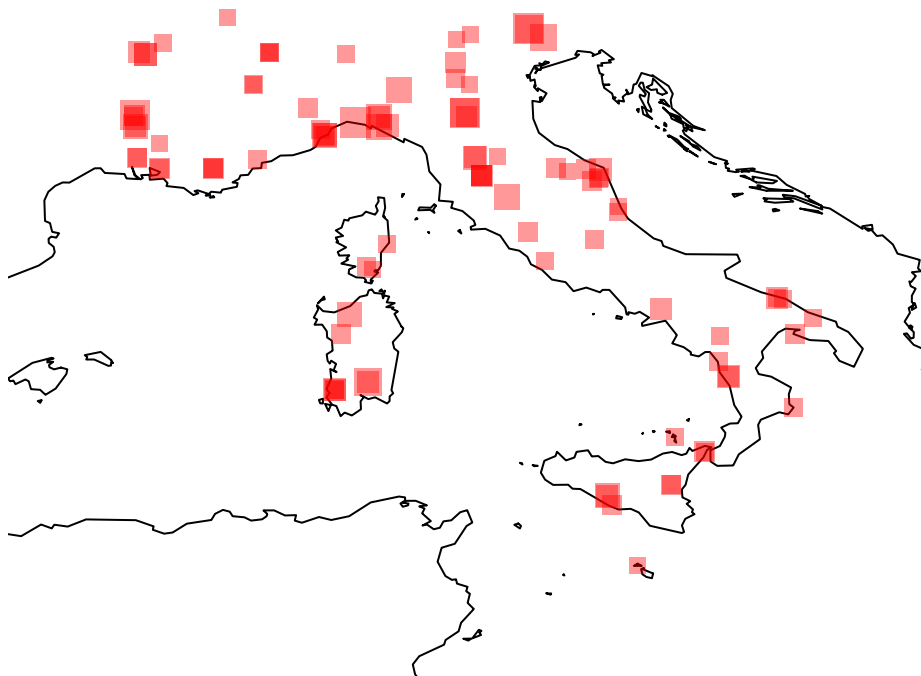

3895 cal. BC

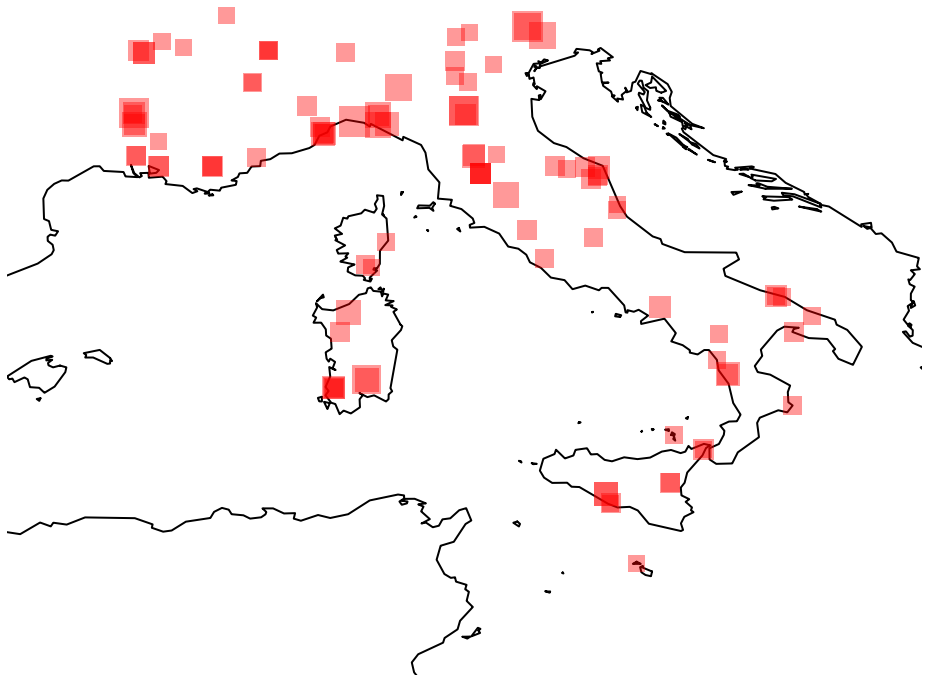

3890 cal. BC

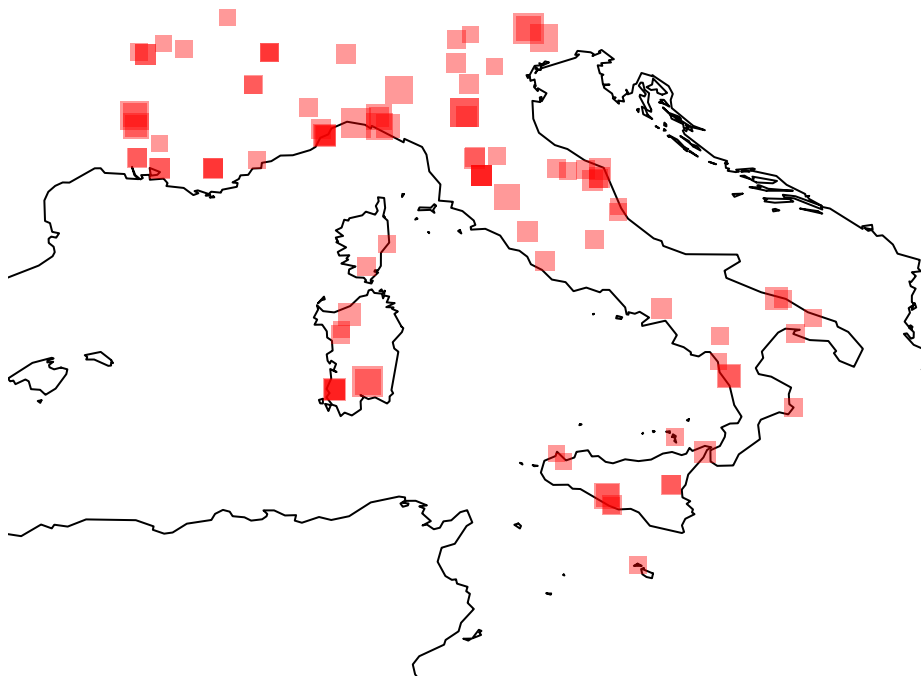



3885 cal. BC

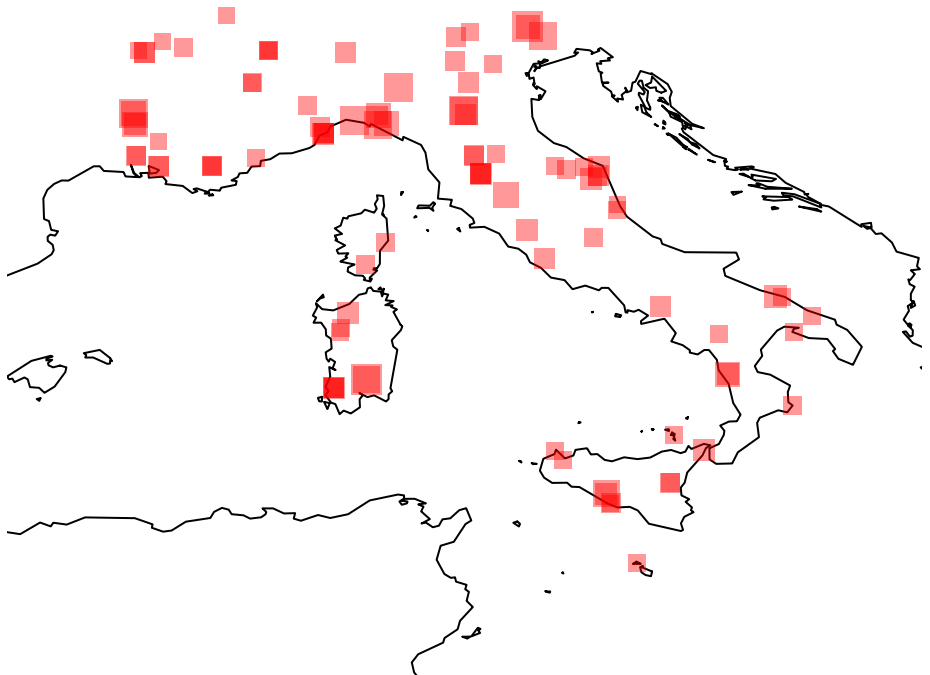

3880 cal. BC

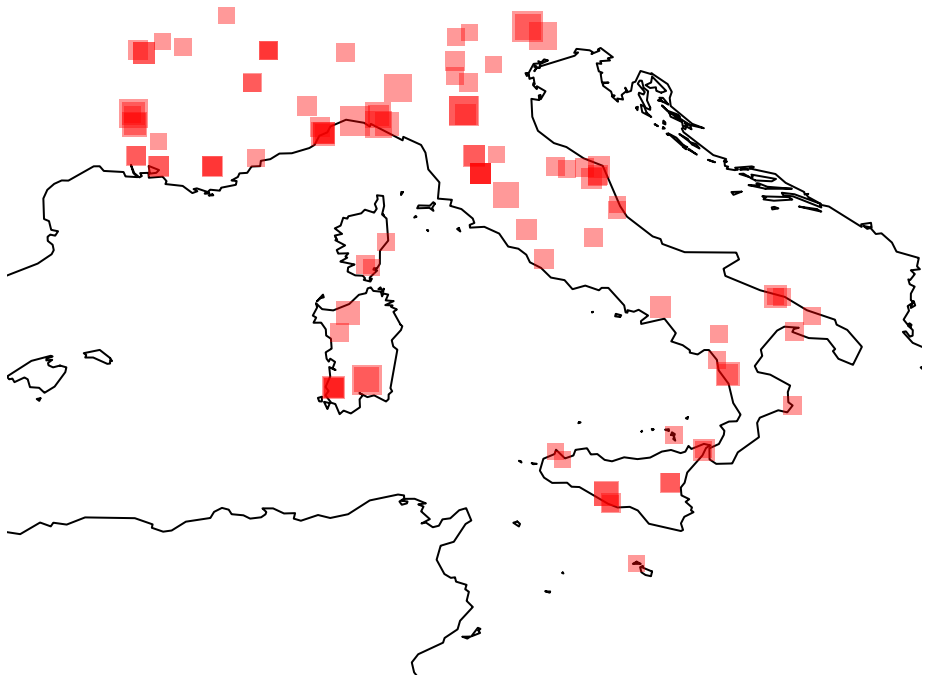

3875 cal. BC

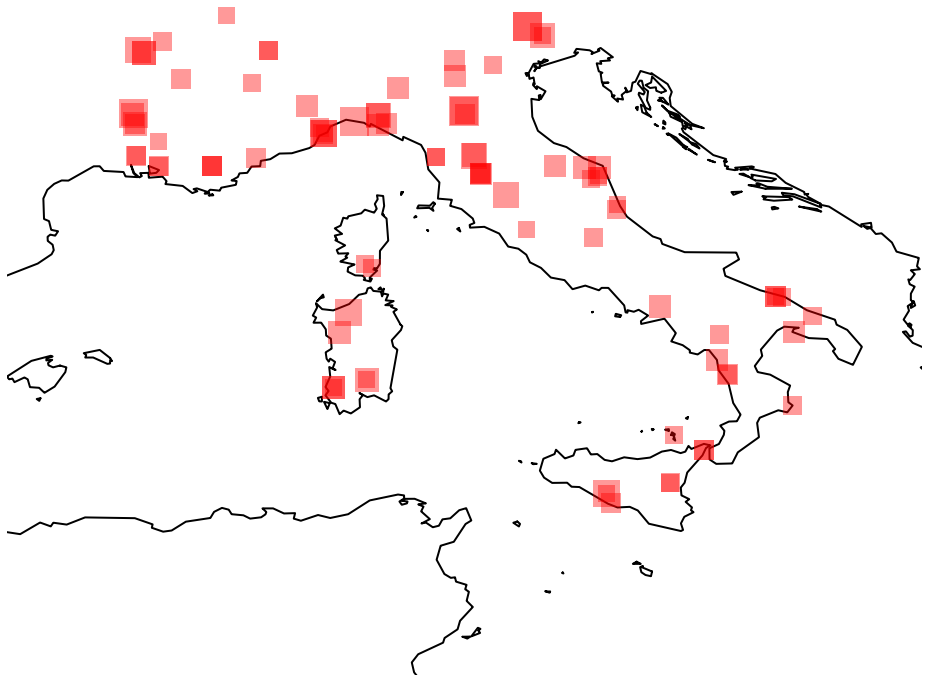

3870 cal. BC

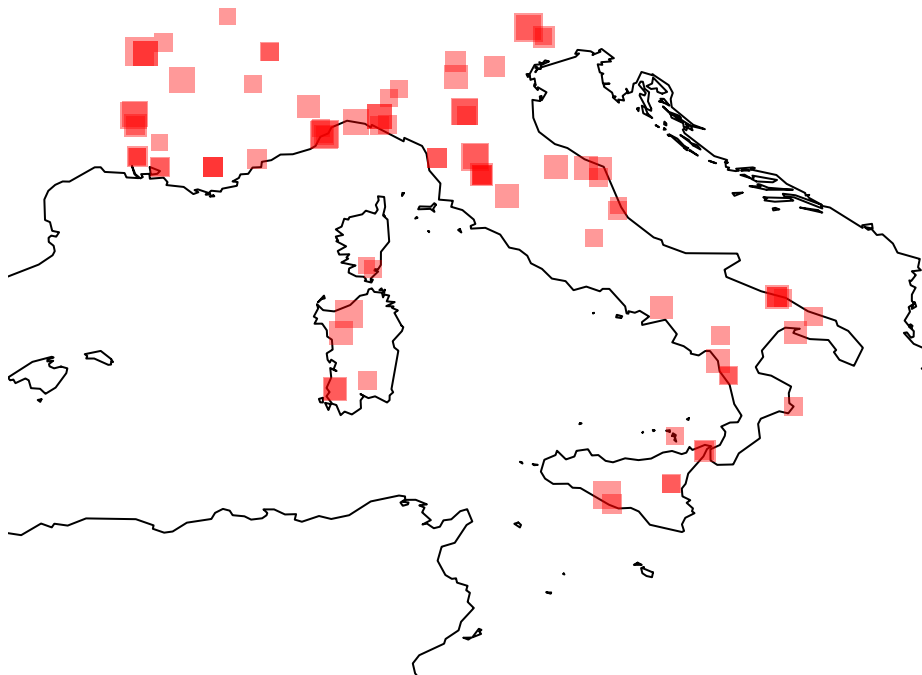

3865 cal. BC

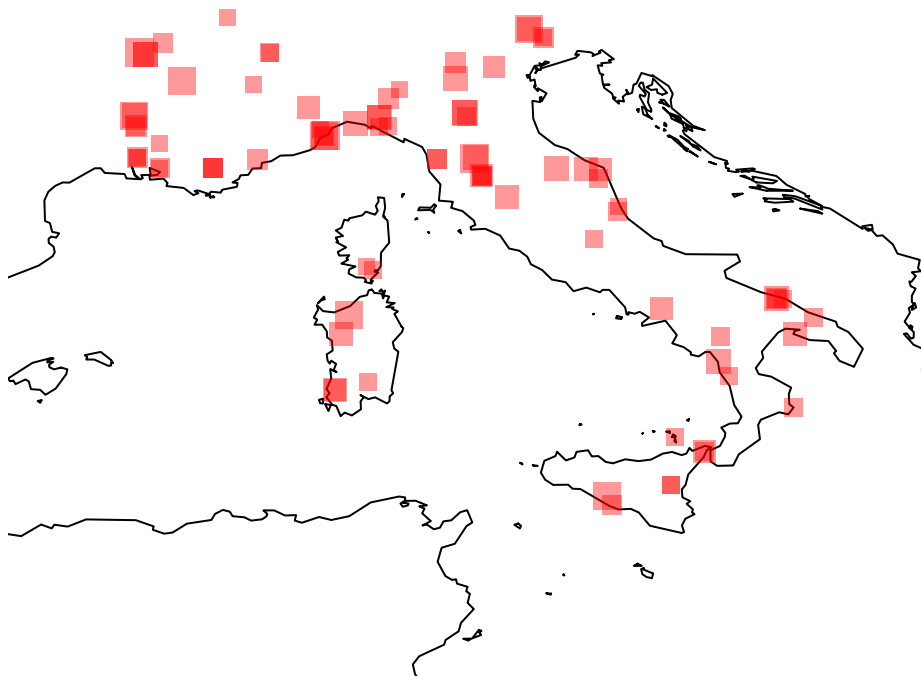

3860 cal. BC

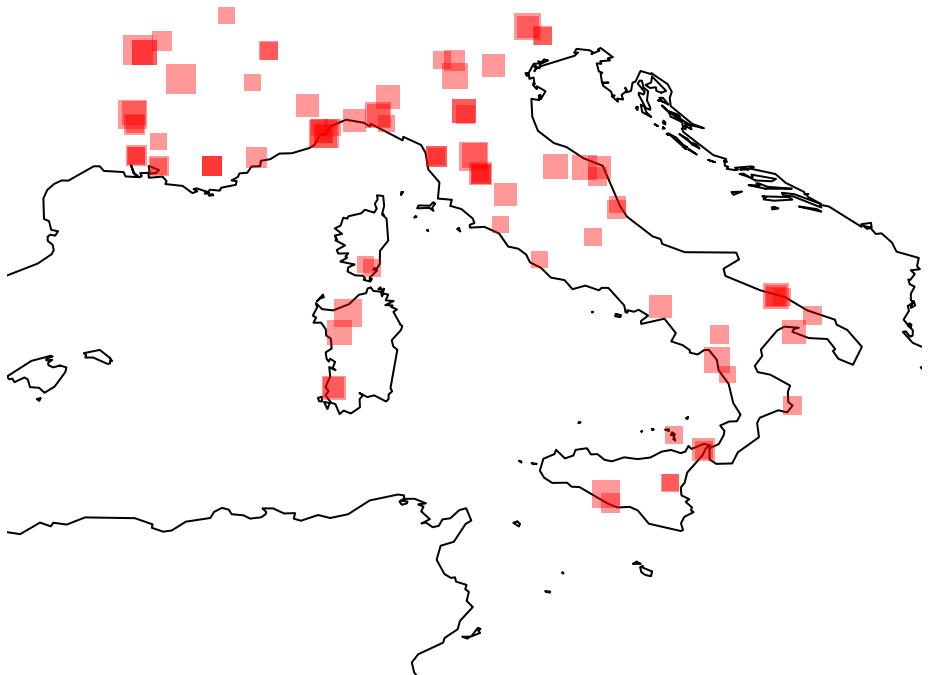

3855 cal. BC

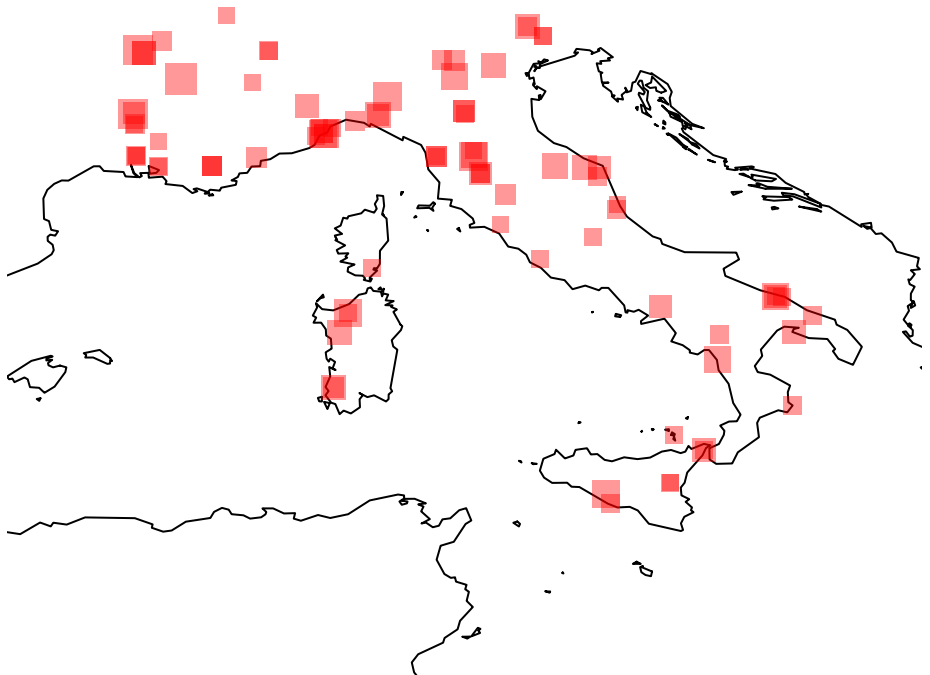

3850 cal. BC

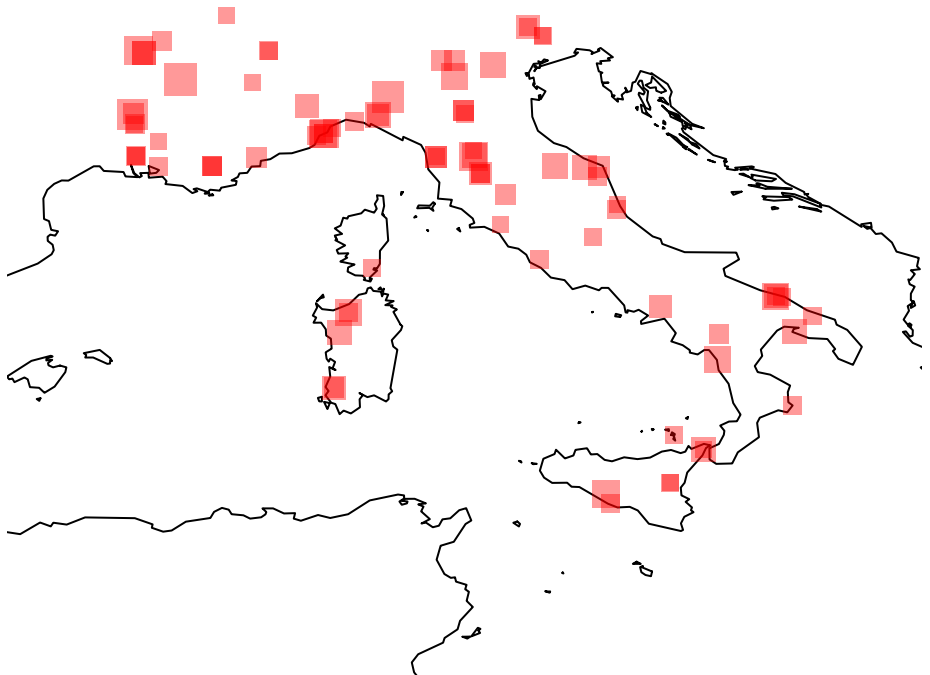



3845 cal. BC

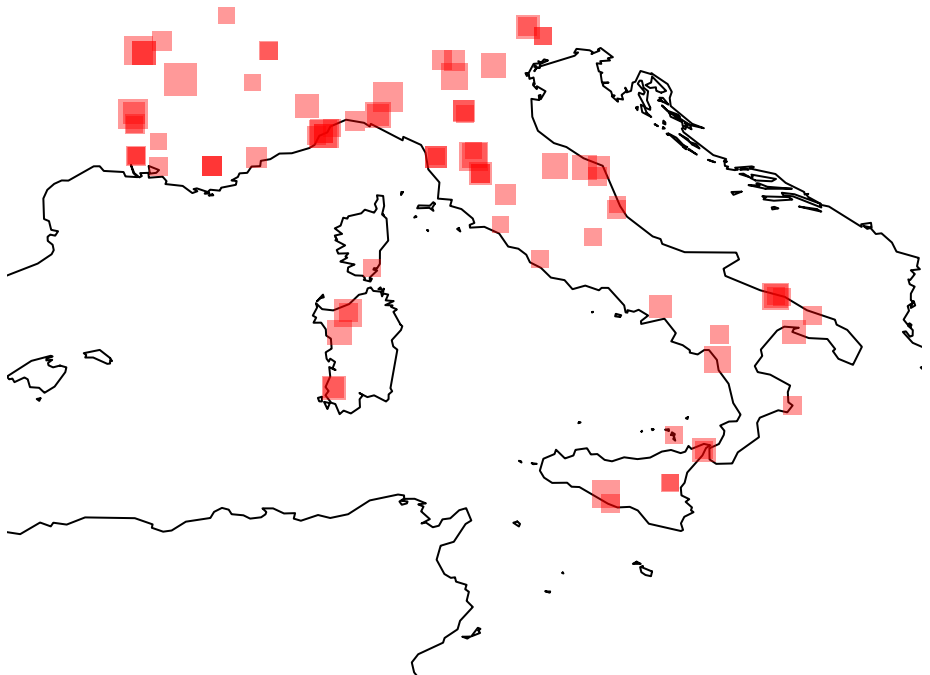

**3840 cal. BC**

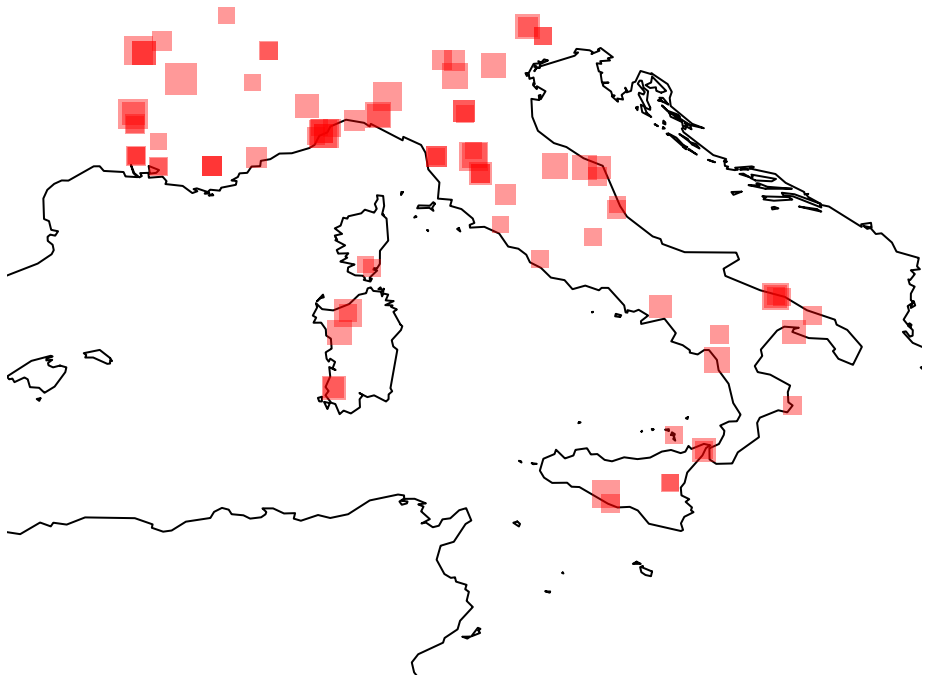

3835 cal. BC

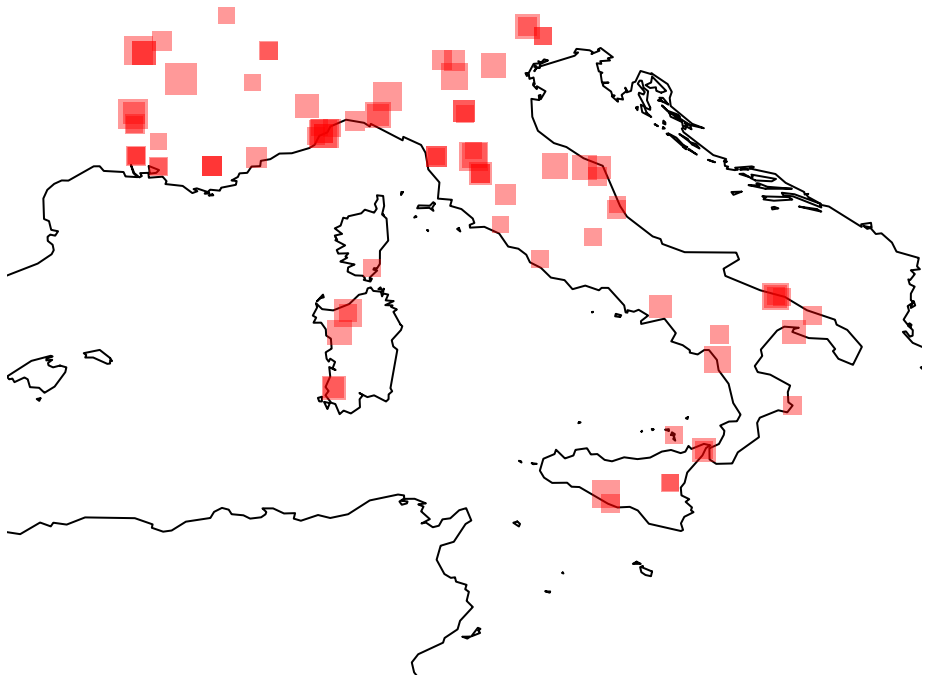

3830 cal. BC

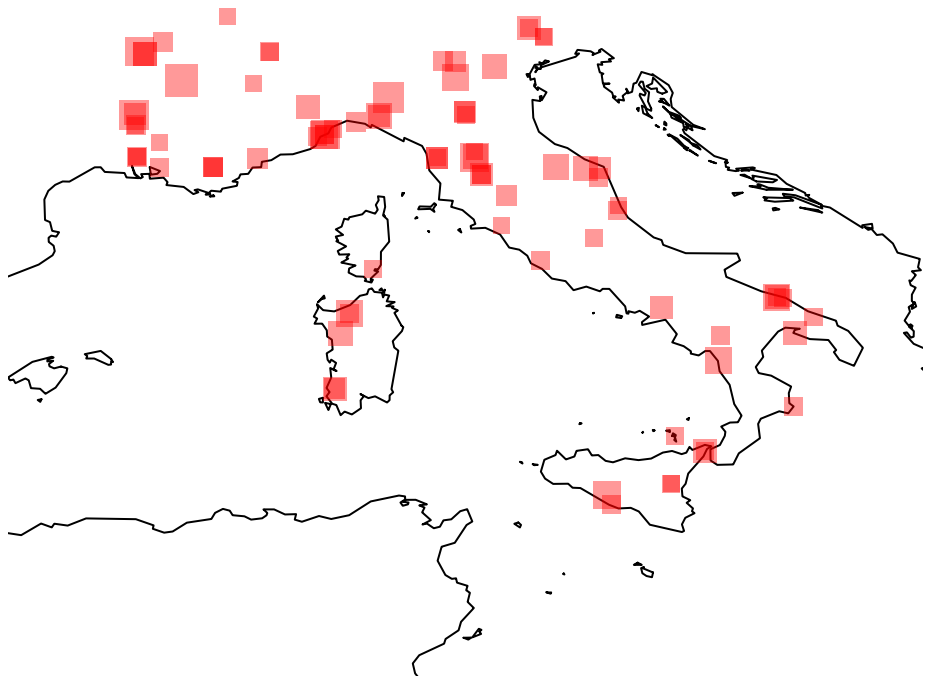

3825 cal. BC



**3820 cal. BC**

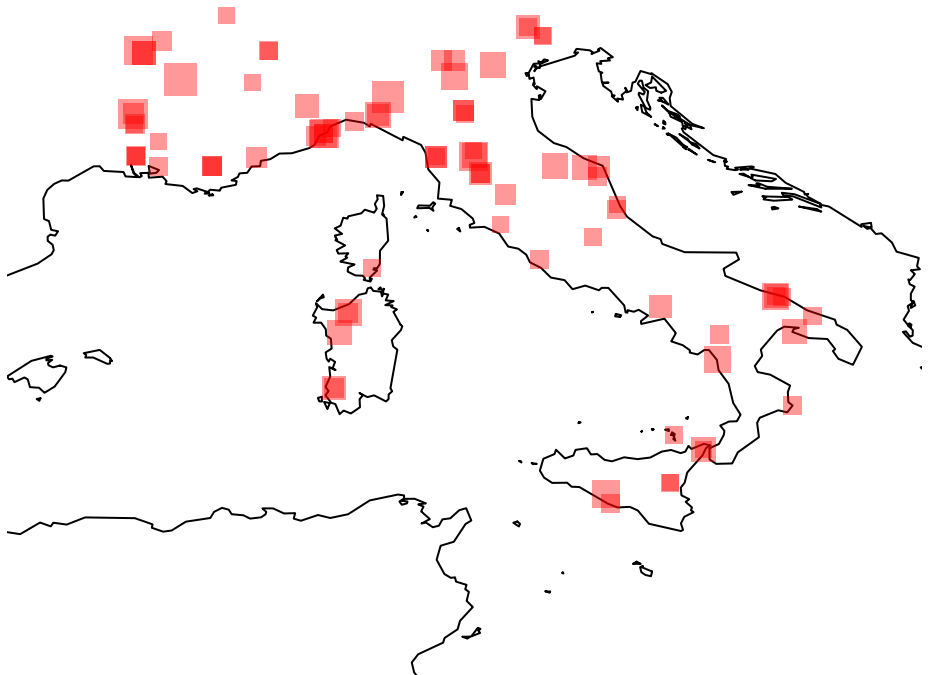

3815 cal. BC

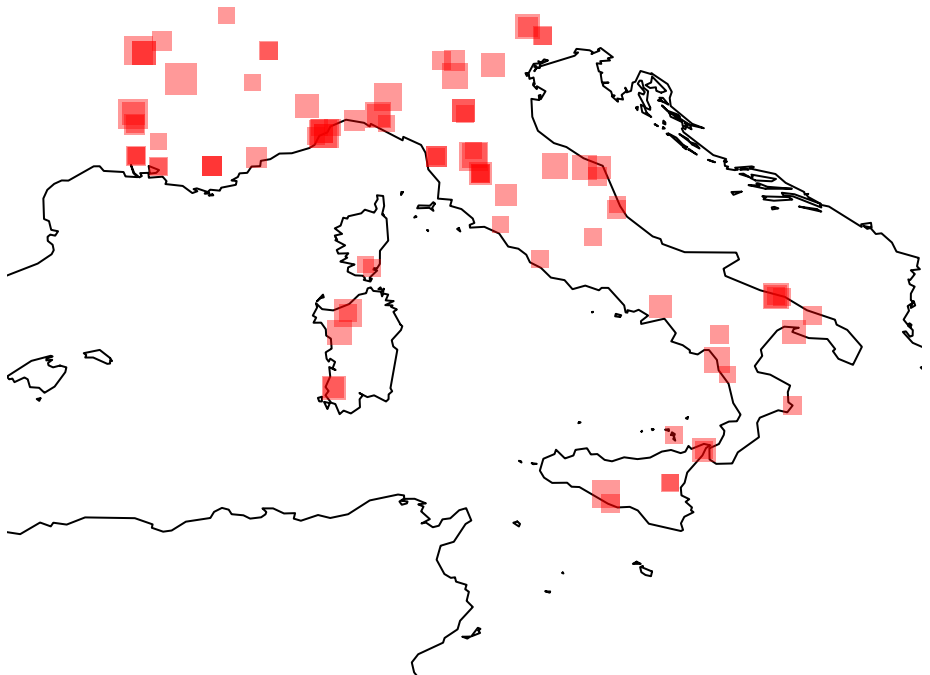

3810 cal. BC

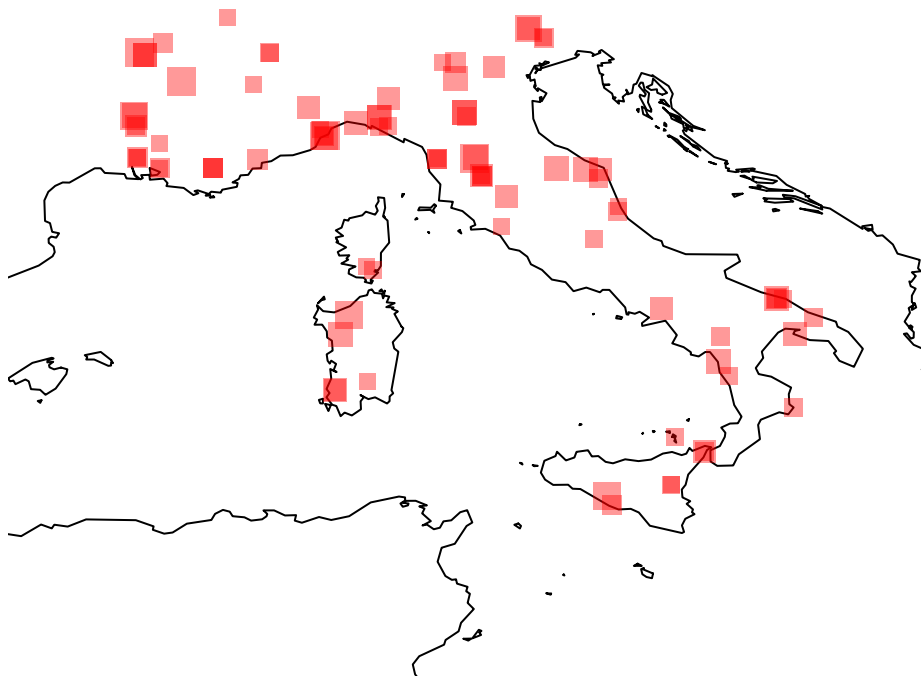



3805 cal. BC

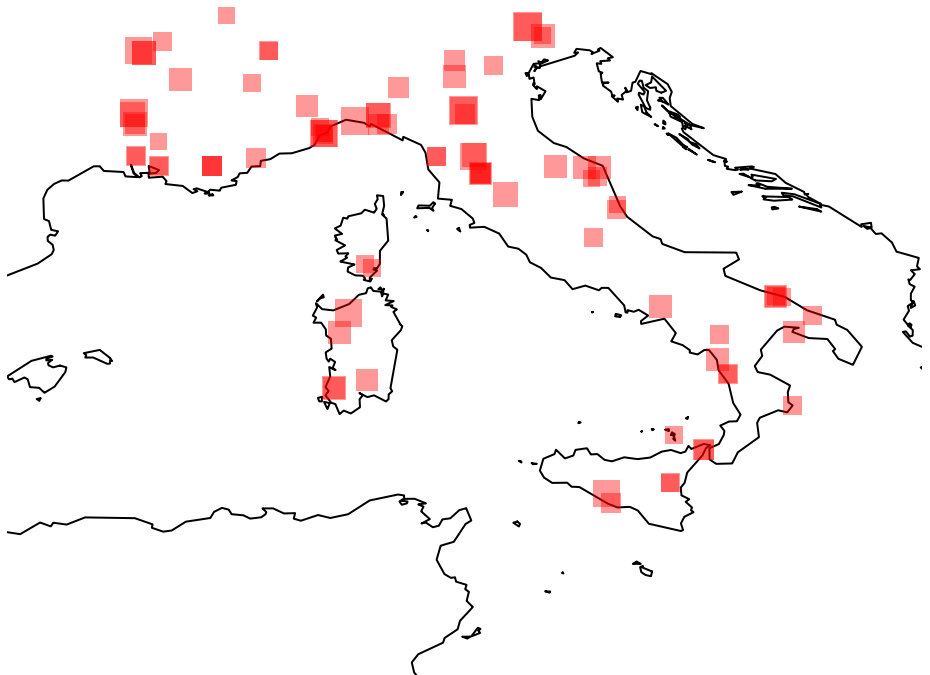

**3800 cal. BC**

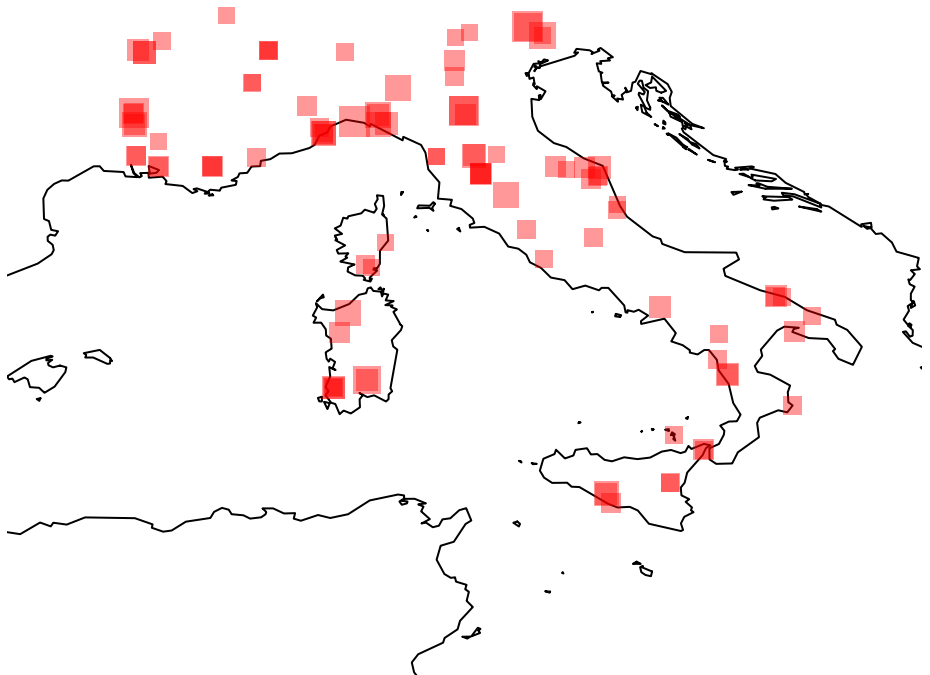

3795 cal. BC

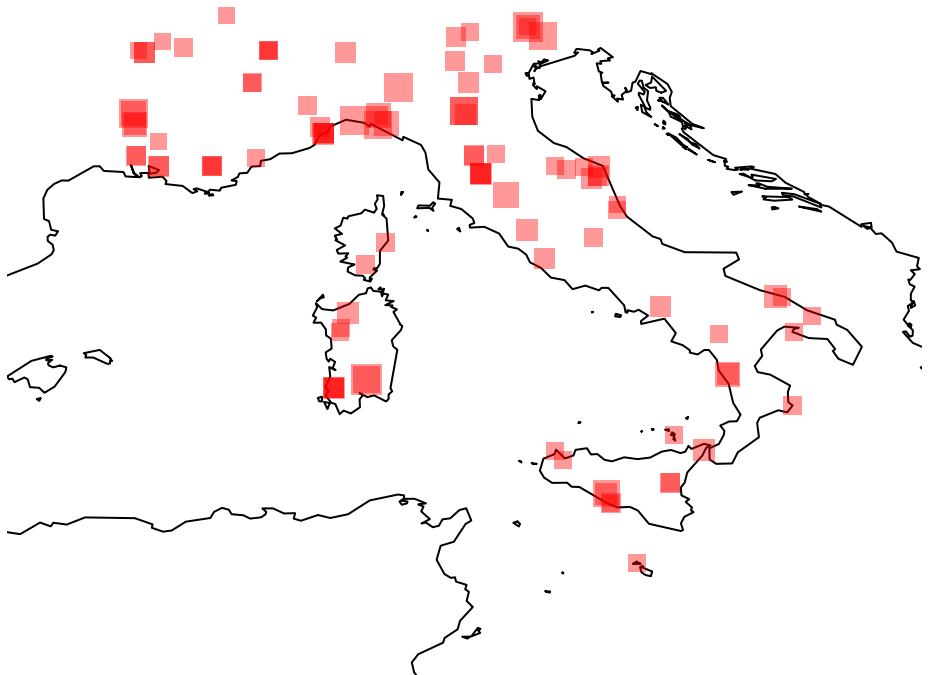

3790 cal. BC

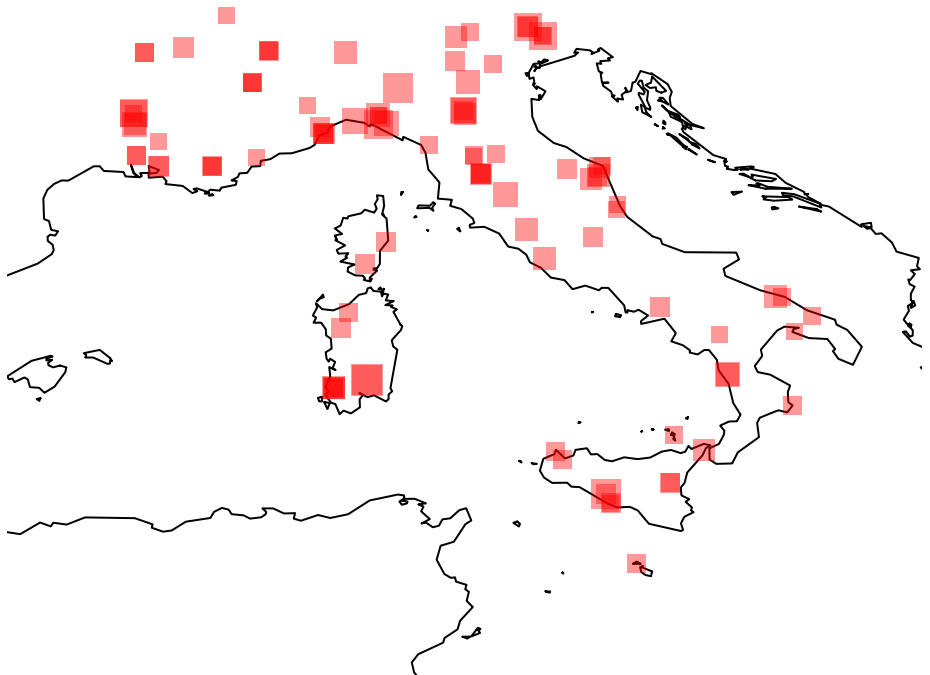

3785 cal. BC

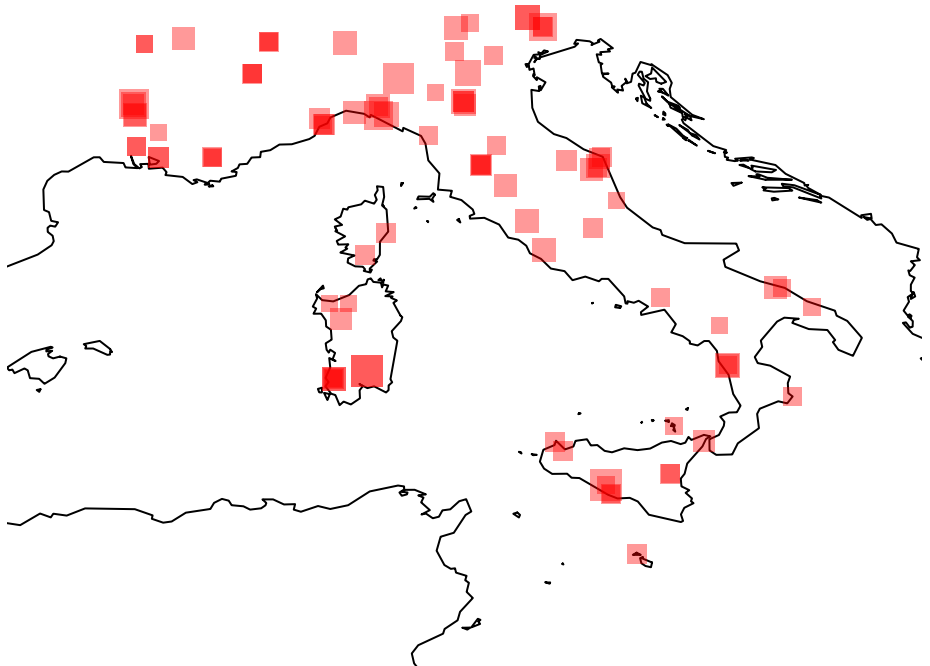

3780 cal. BC

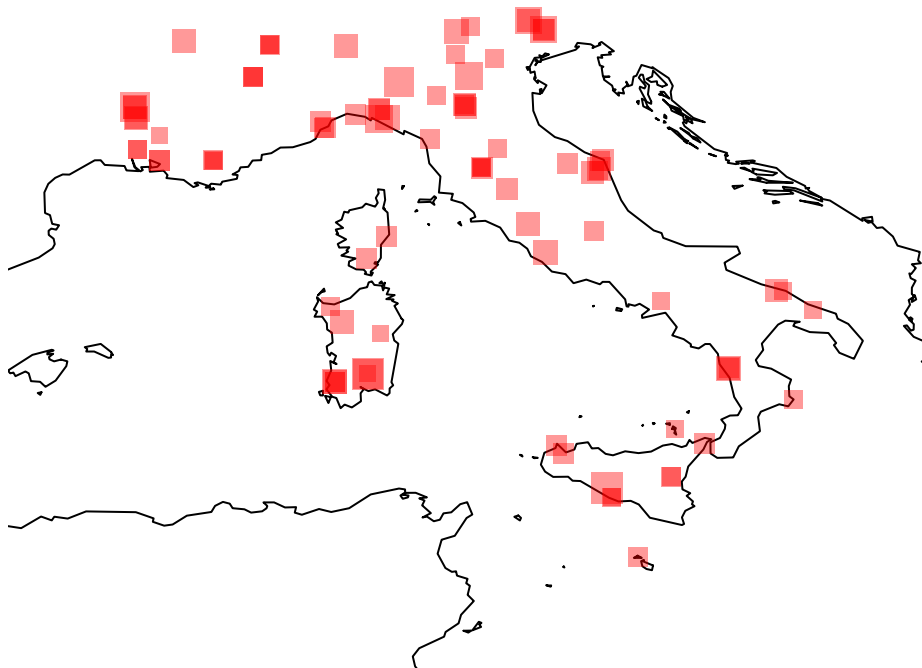

3775 cal. BC

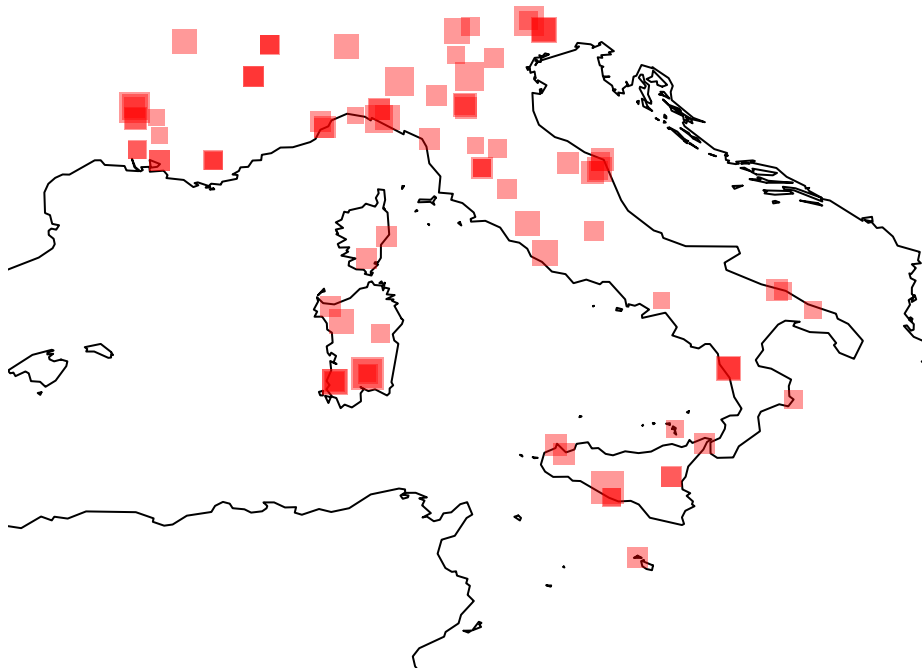

3770 cal. BC

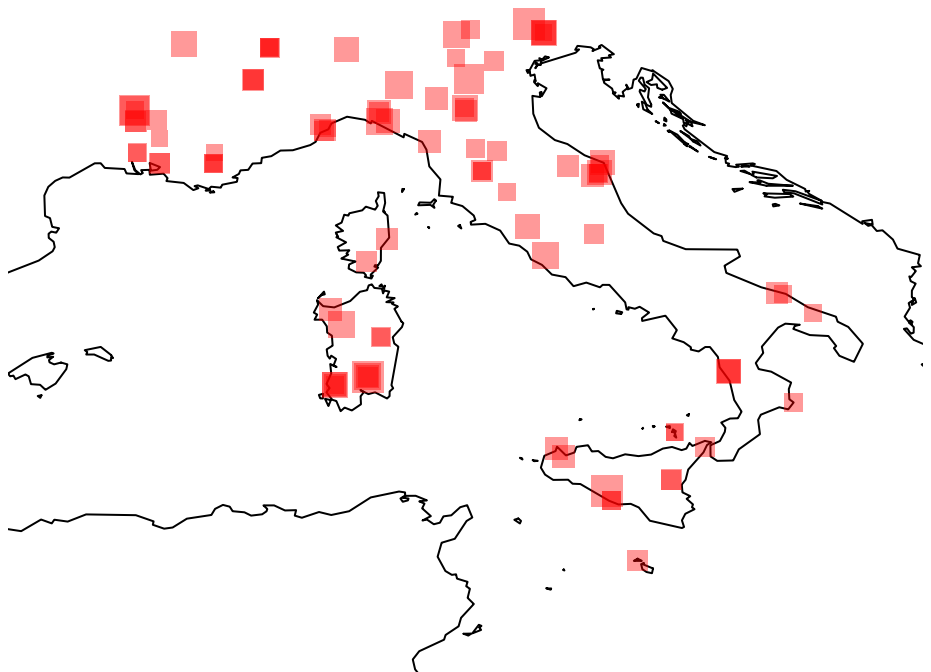



3765 cal. BC

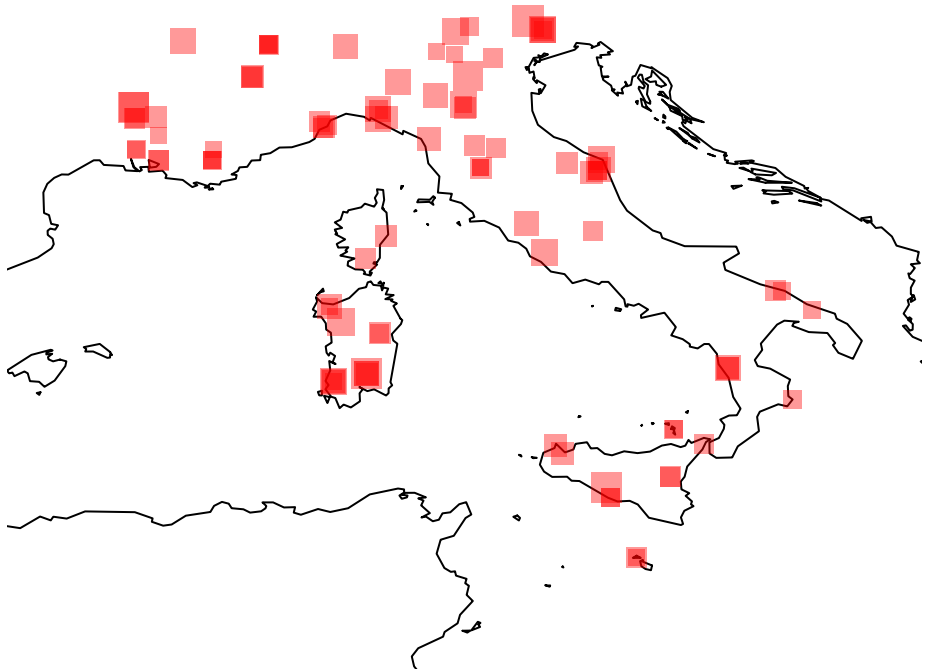

3760 cal. BC

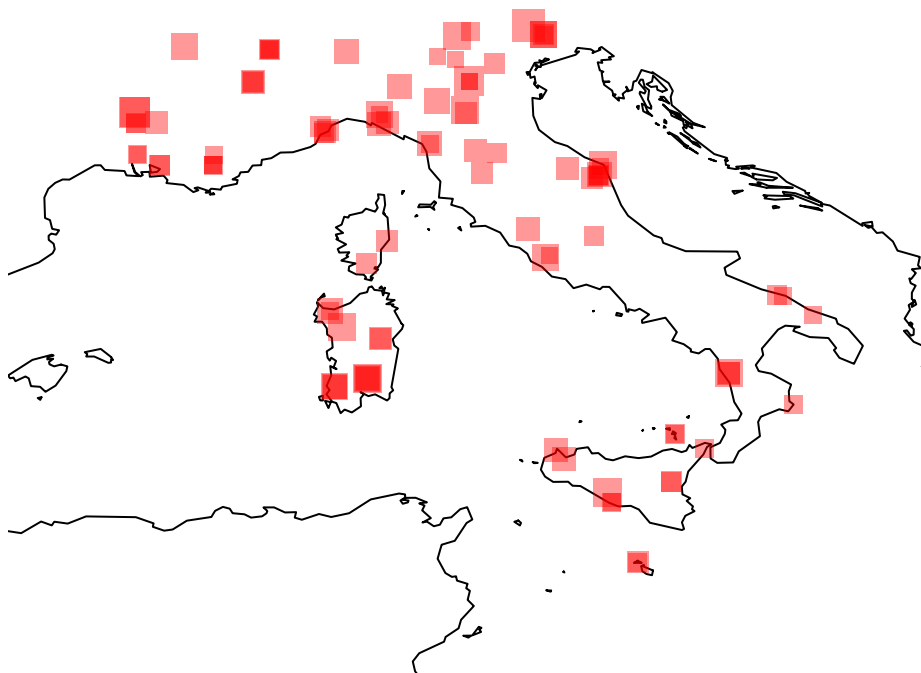

3755 cal. BC

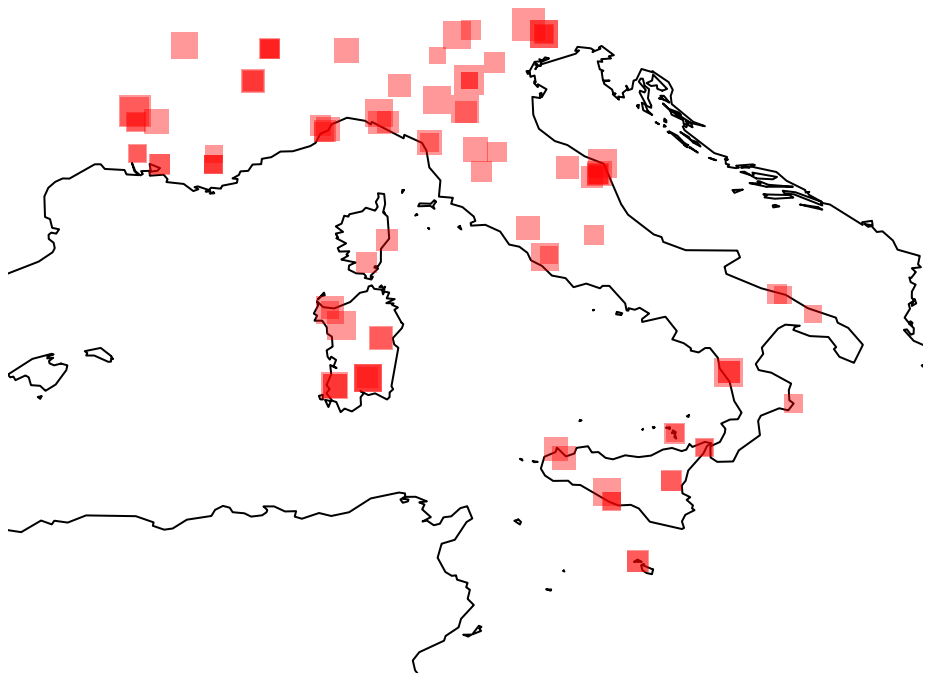

3750 cal. BC

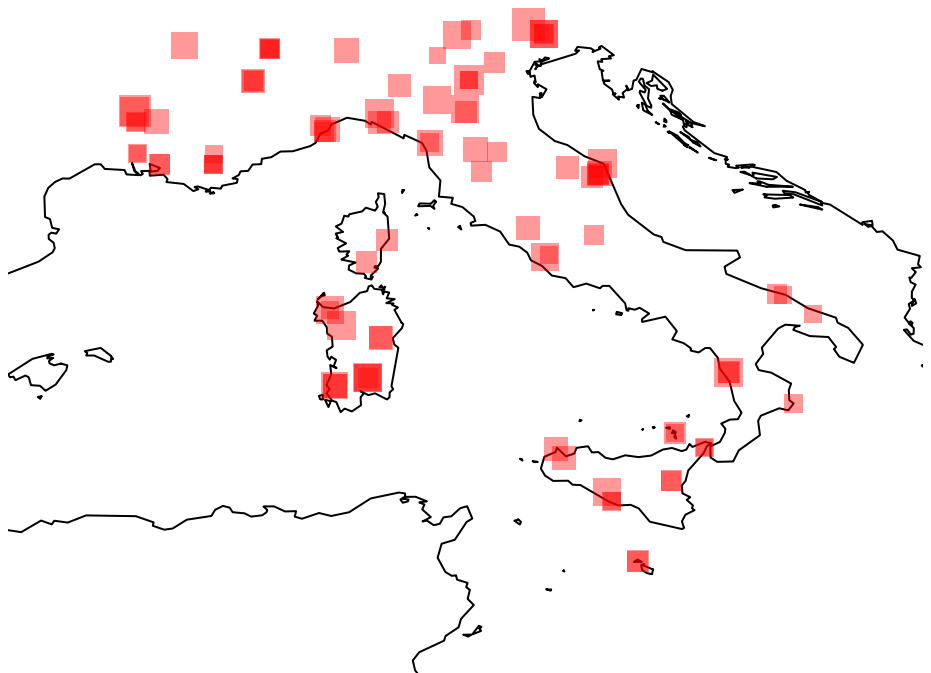

3745 cal. BC

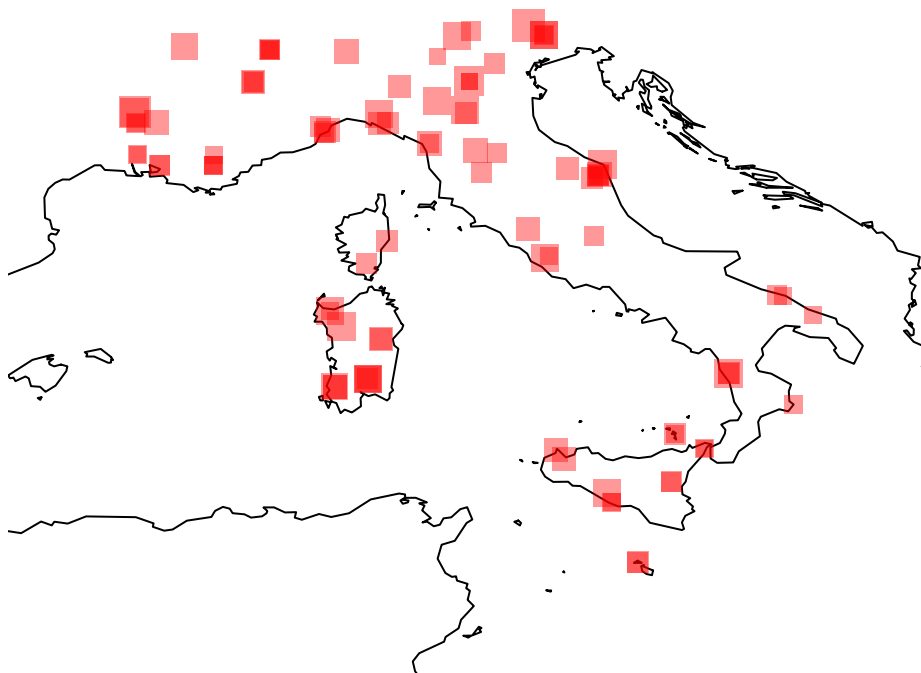

3740 cal. BC

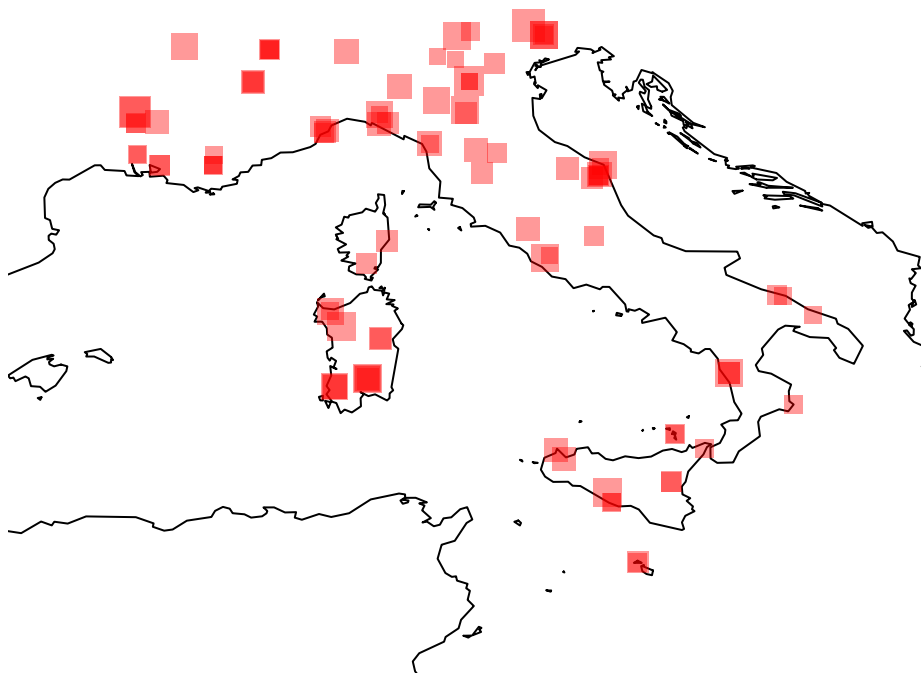

3735 cal. BC

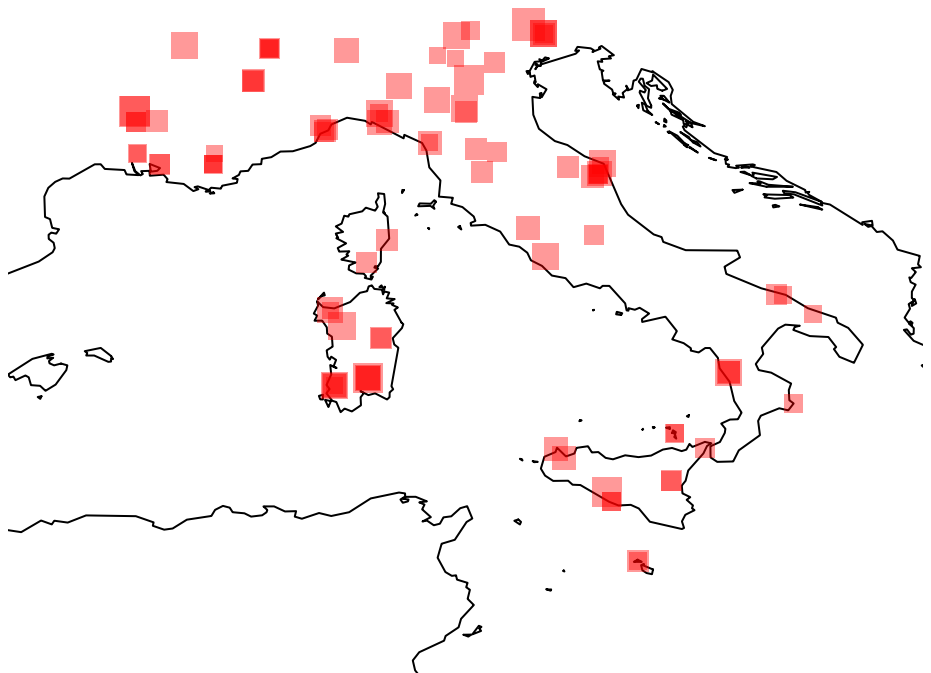

3730 cal. BC

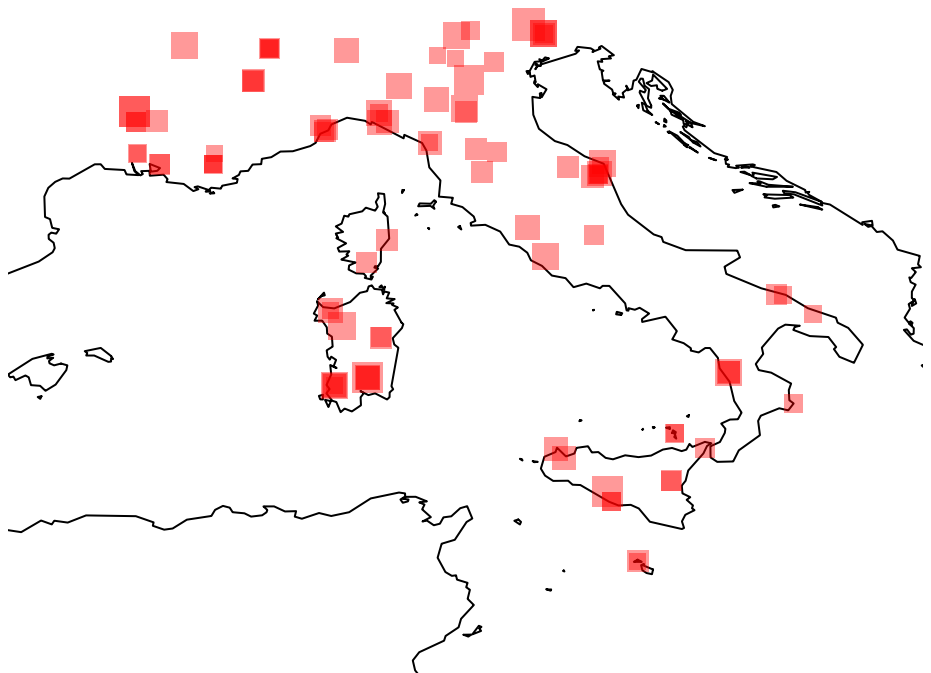



3725 cal. BC

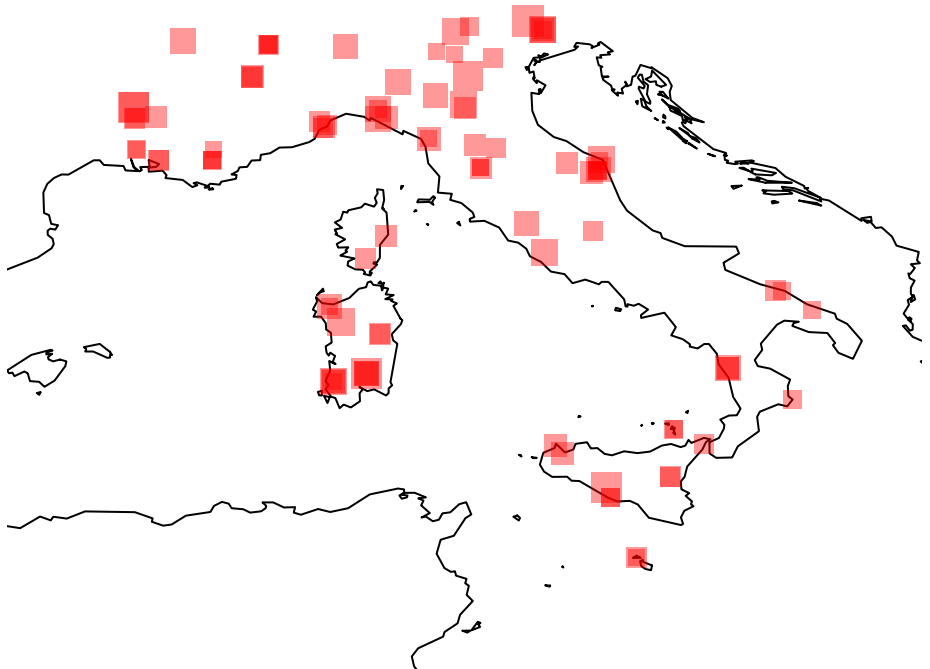

3720 cal. BC

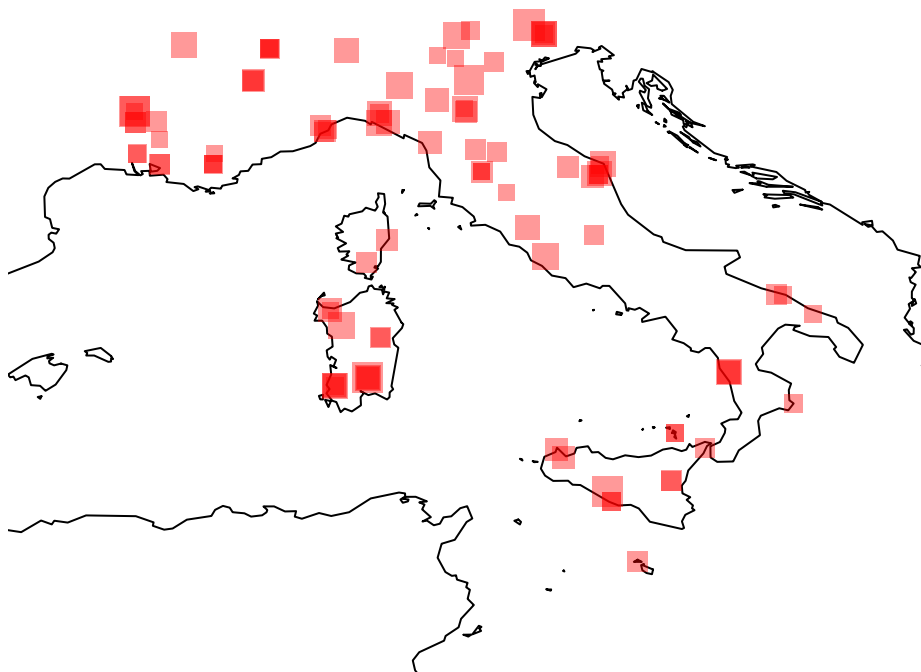

3715 cal. BC

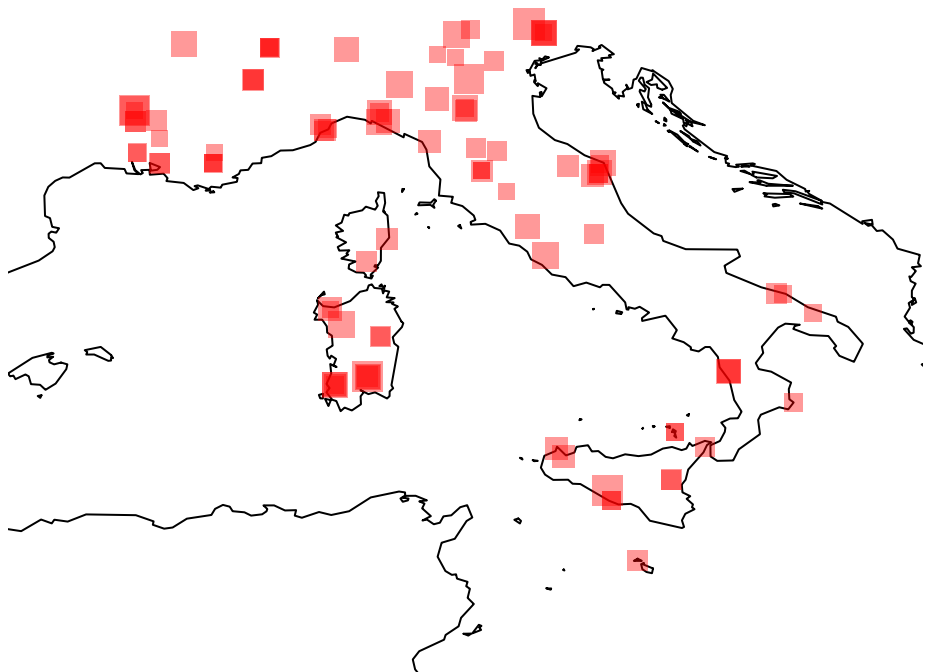

3710 cal. BC

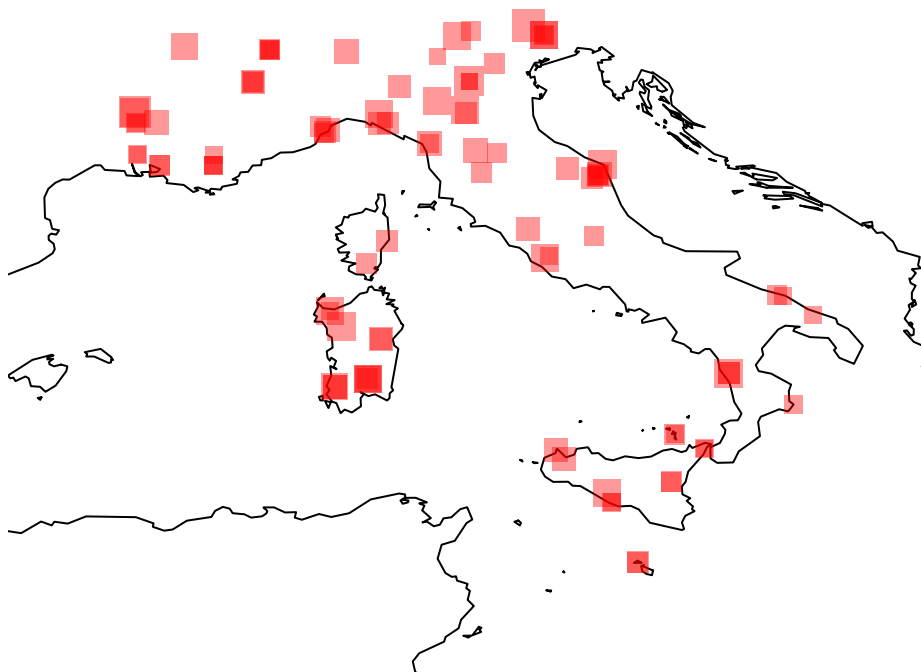

3705 cal. BC

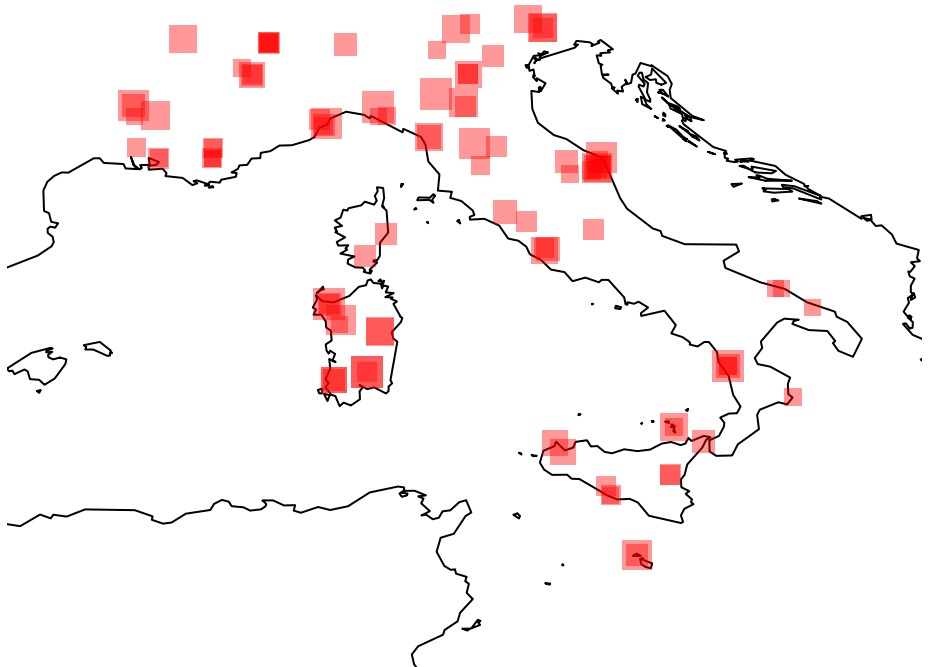

3700 cal. BC

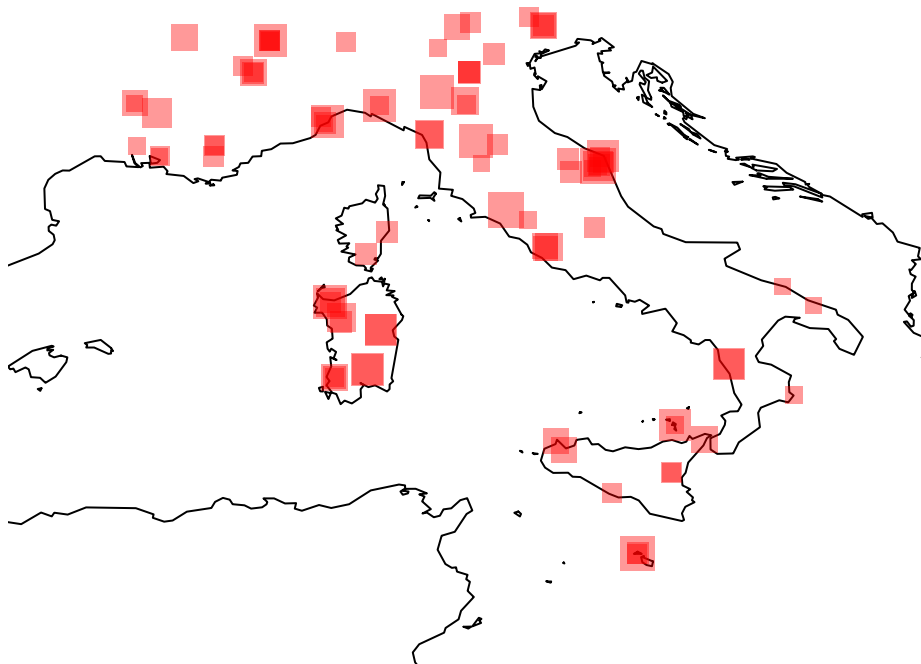

3695 cal. BC

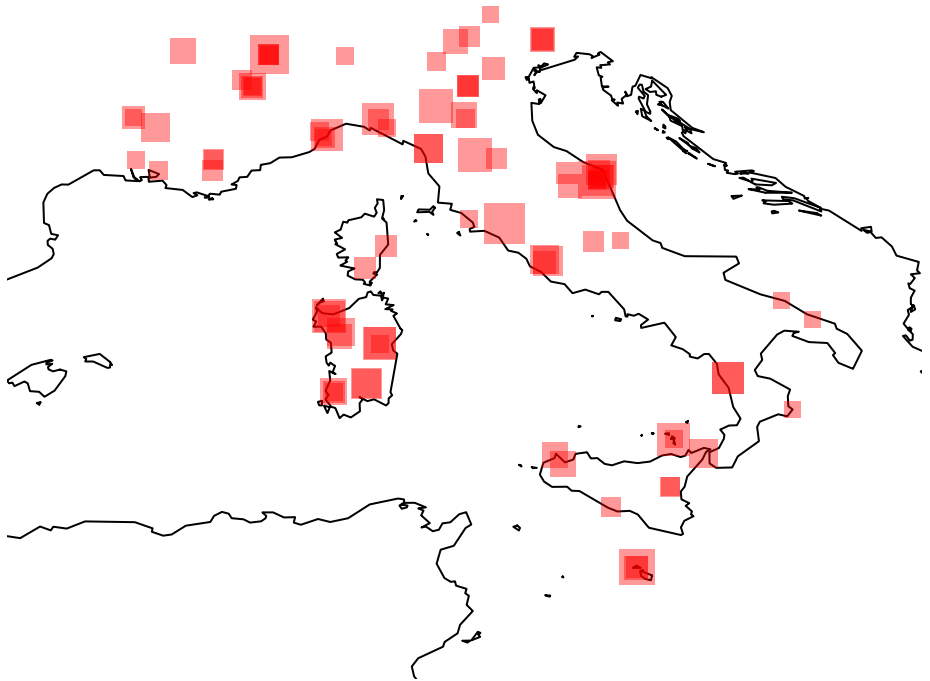

3690 cal. BC

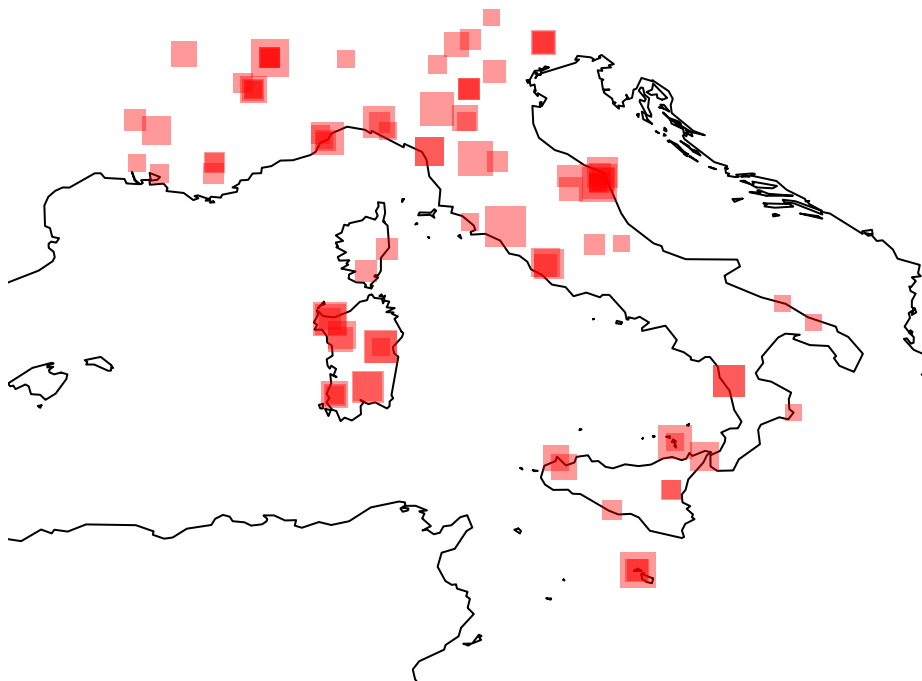



3685 cal. BC

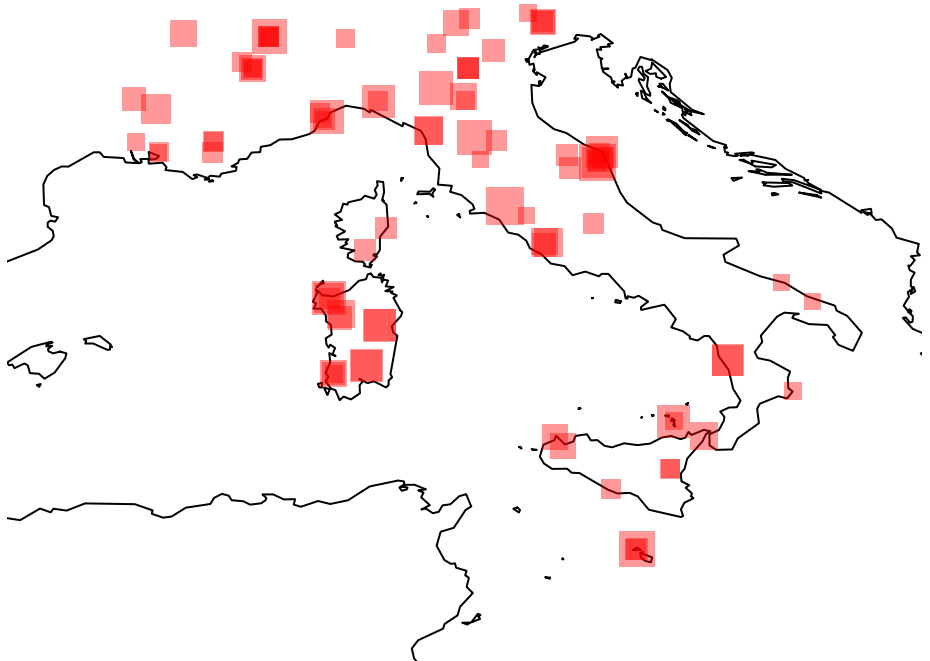

3680 cal. BC

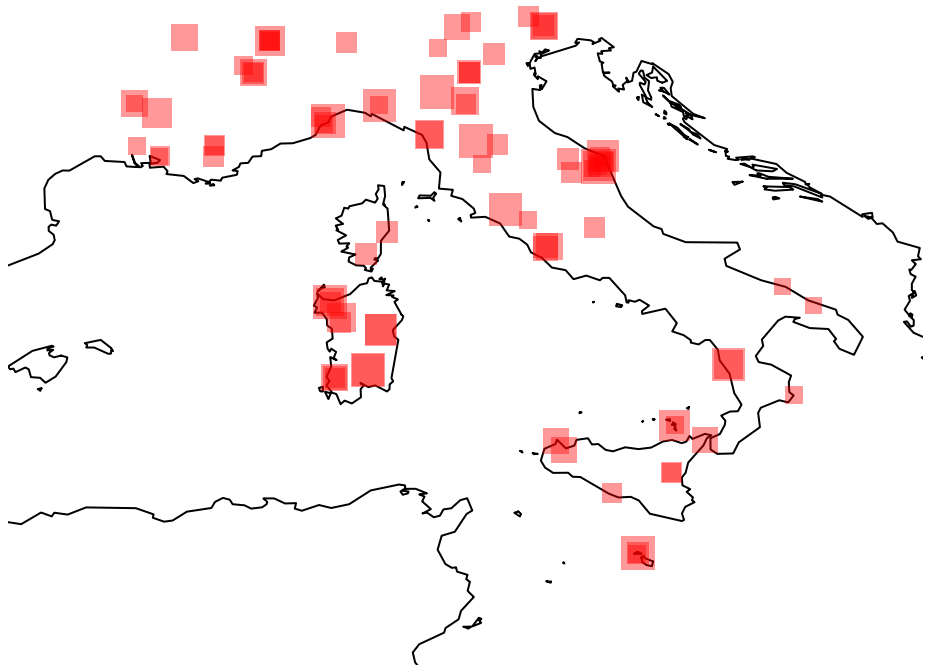

3675 cal. BC

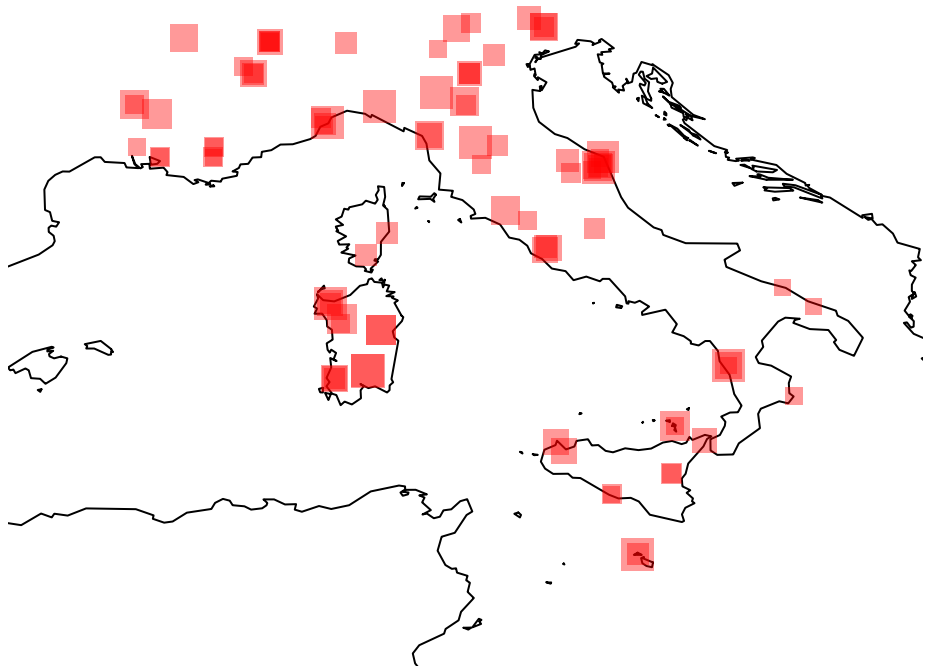

3670 cal. BC

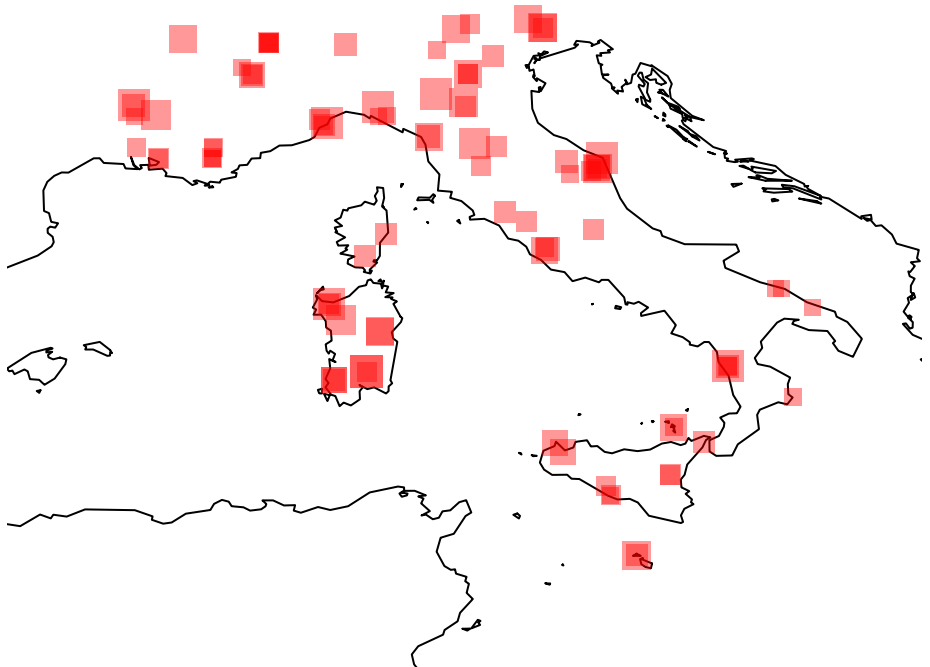

3665 cal. BC

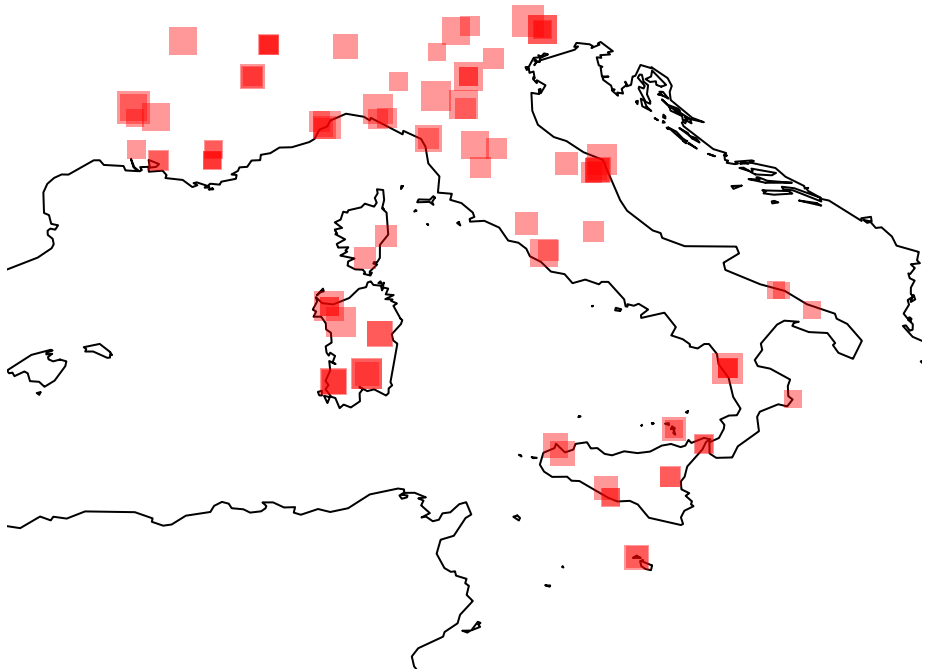

3660 cal. BC

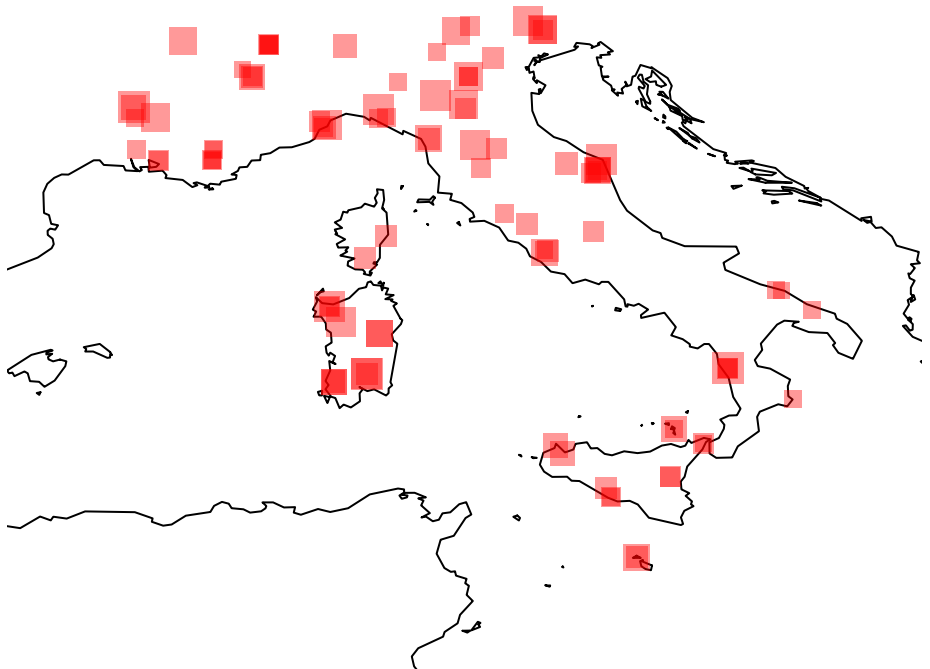

3655 cal. BC

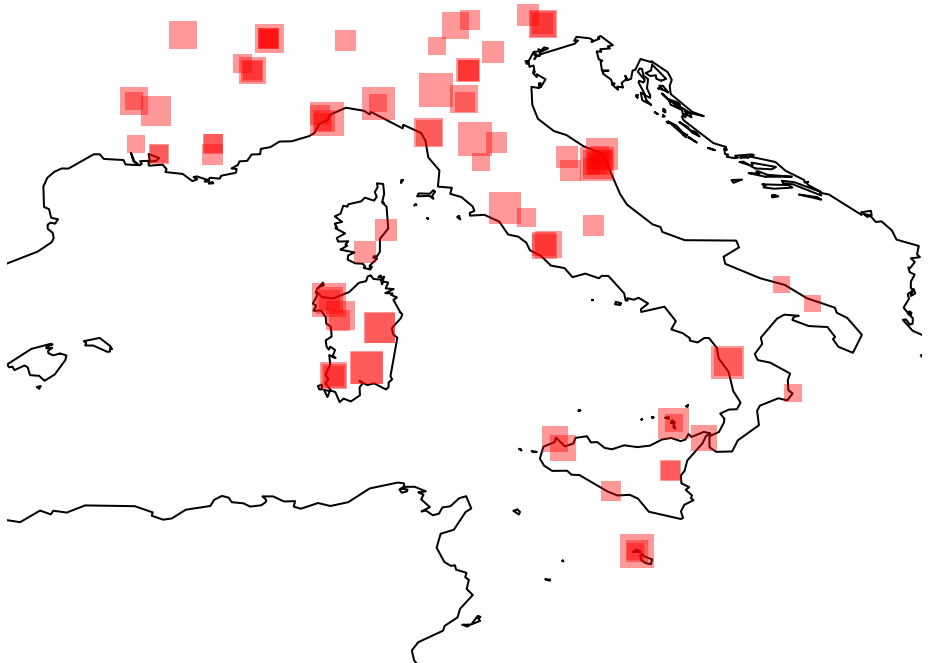

3650 cal. BC

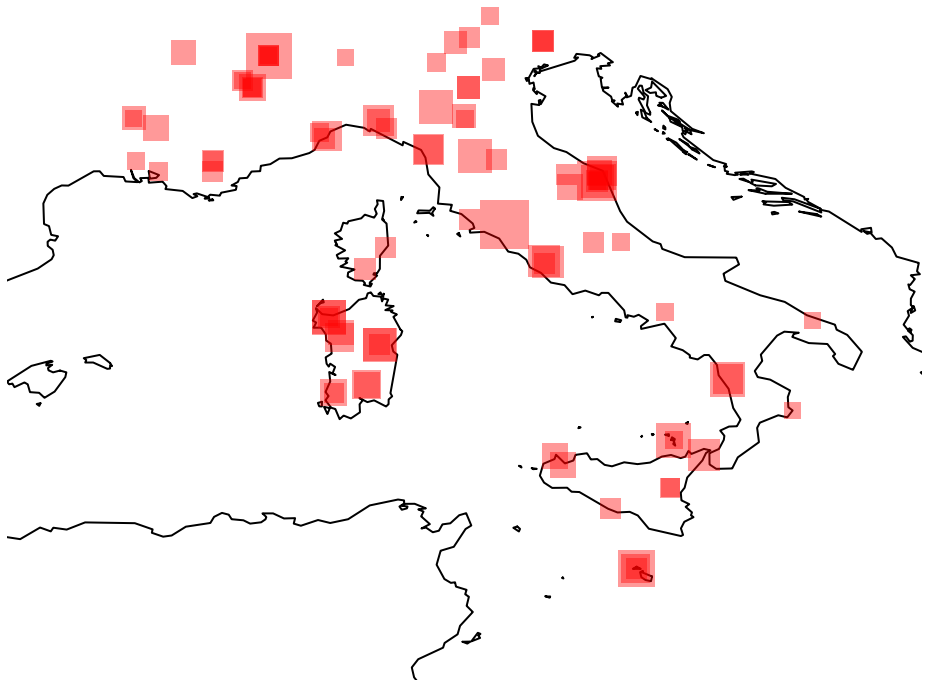



3645 cal. BC

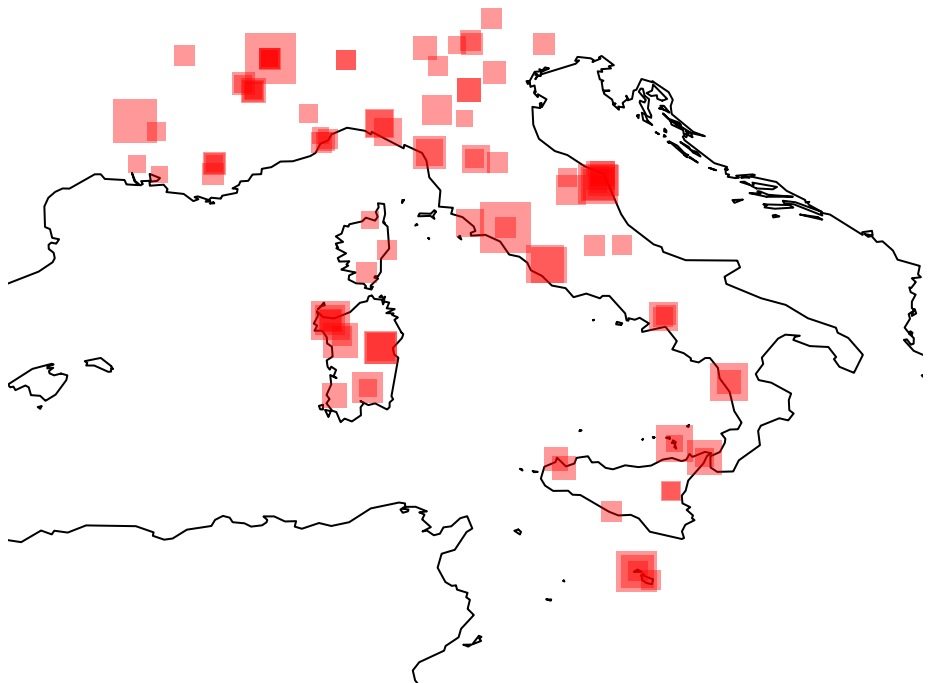

3640 cal. BC

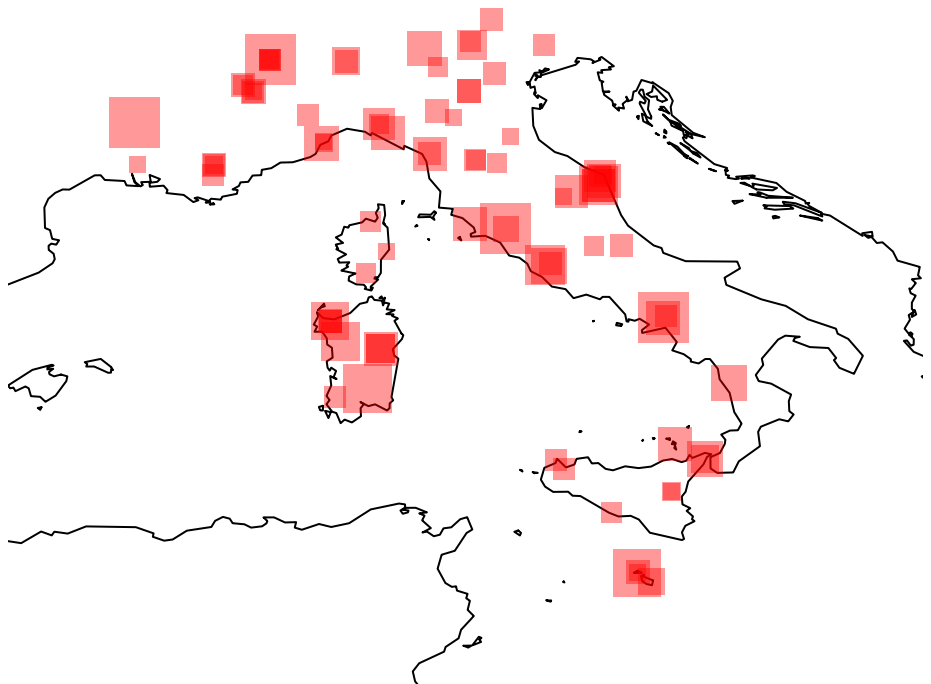

3635 cal. BC

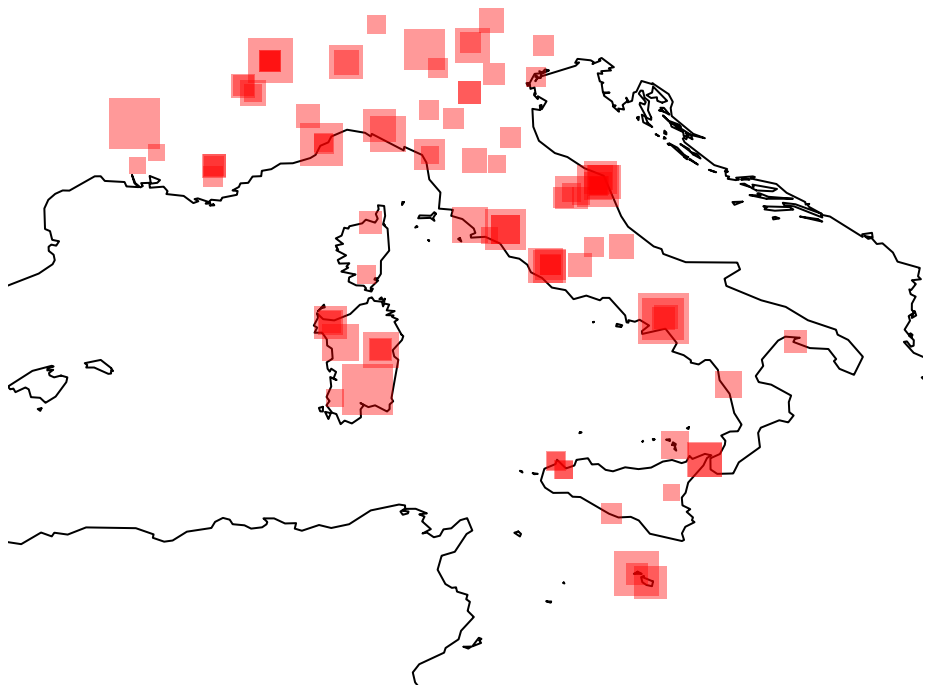

3630 cal. BC

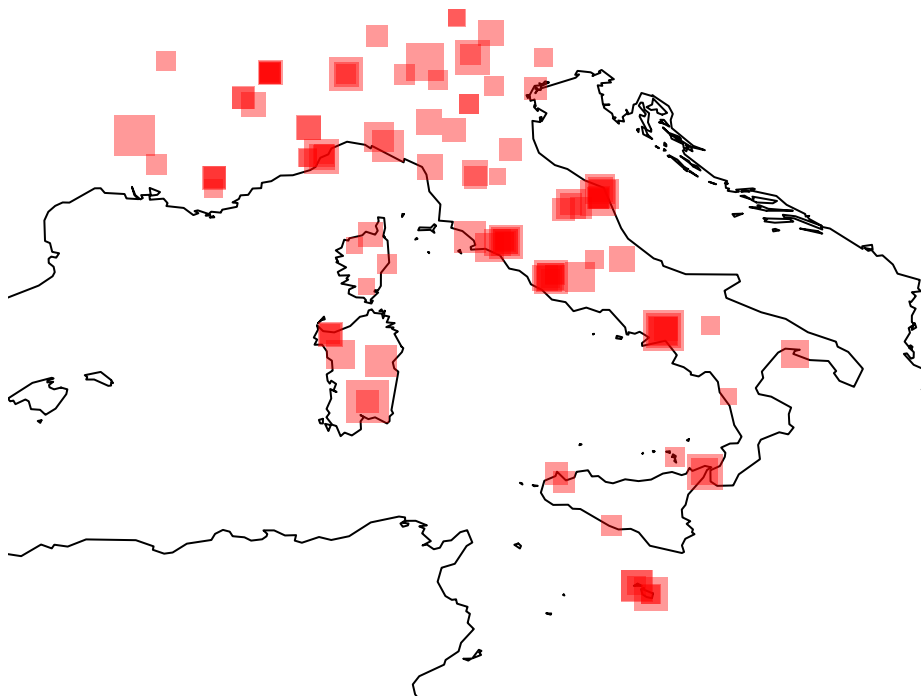

3625 cal. BC

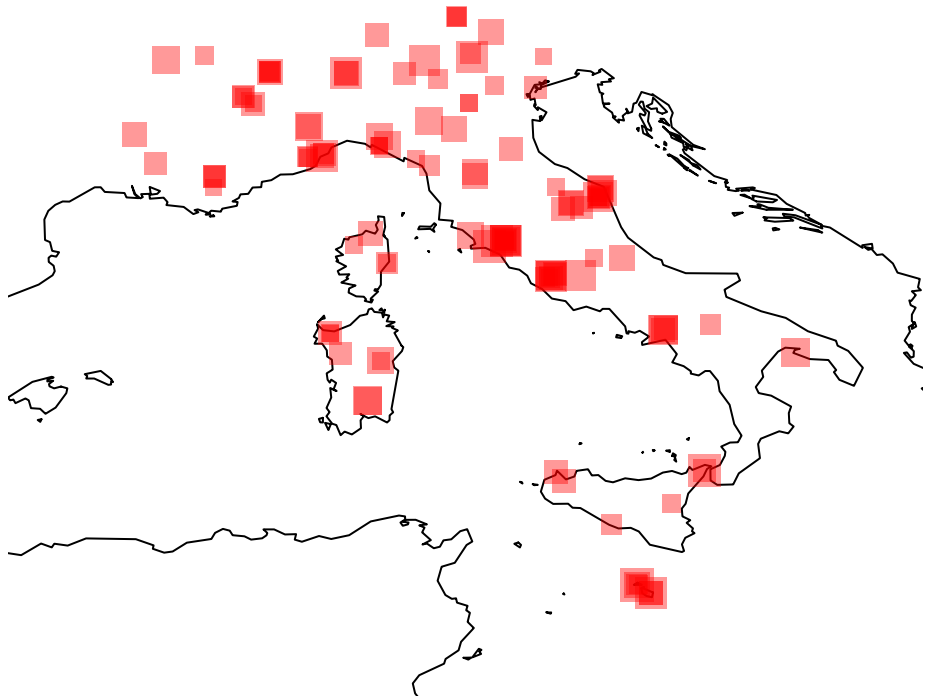

3620 cal. BC

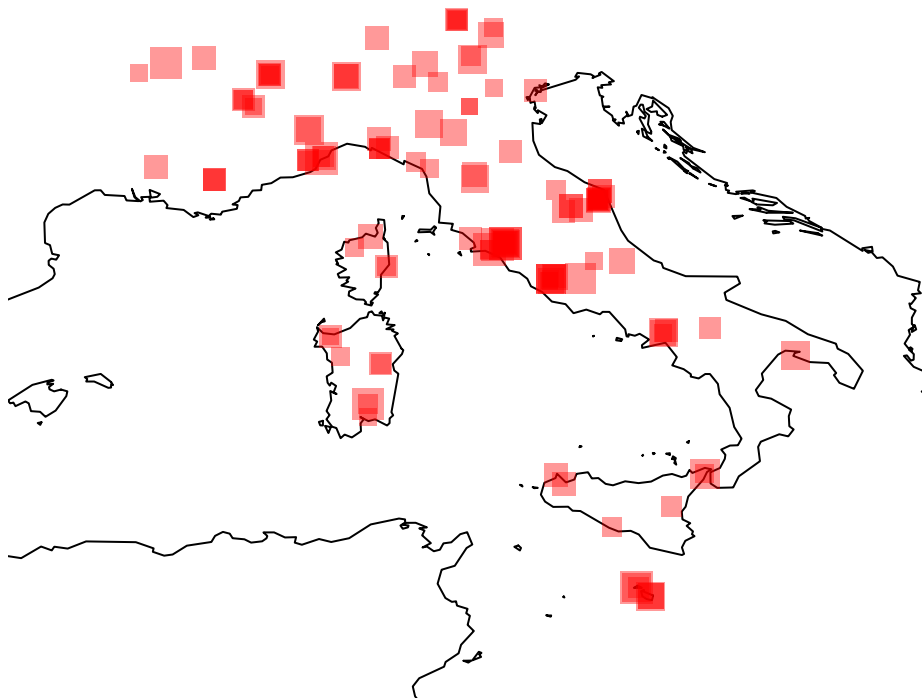

3615 cal. BC

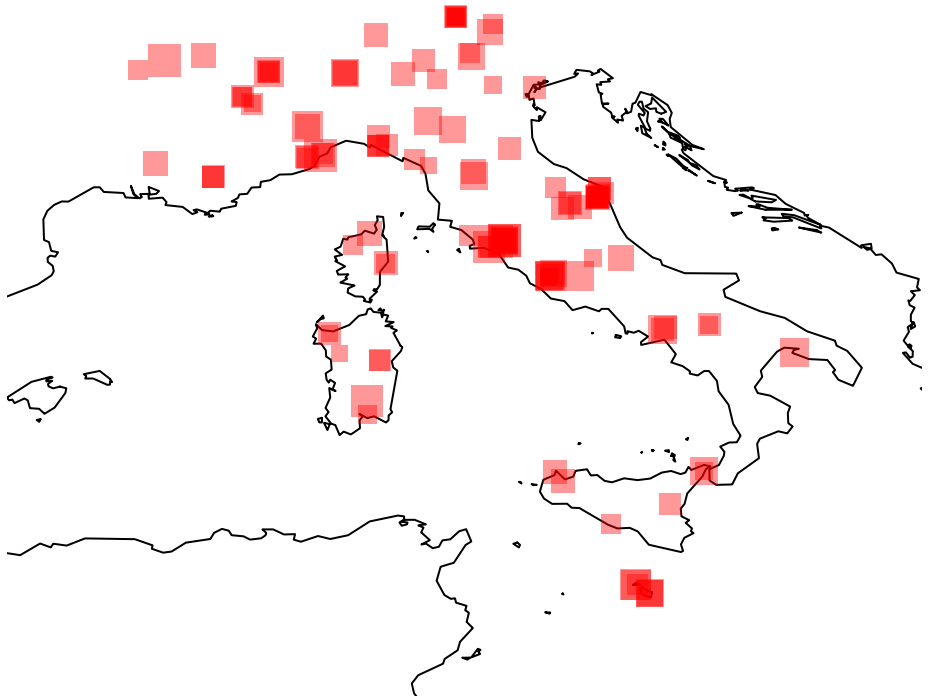

3610 cal. BC

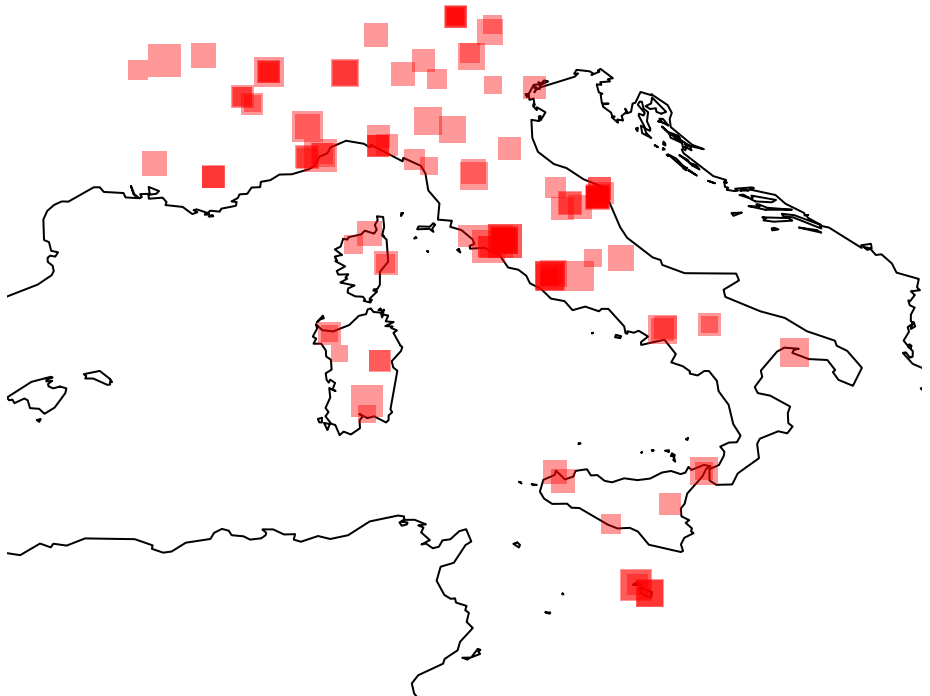



3605 cal. BC

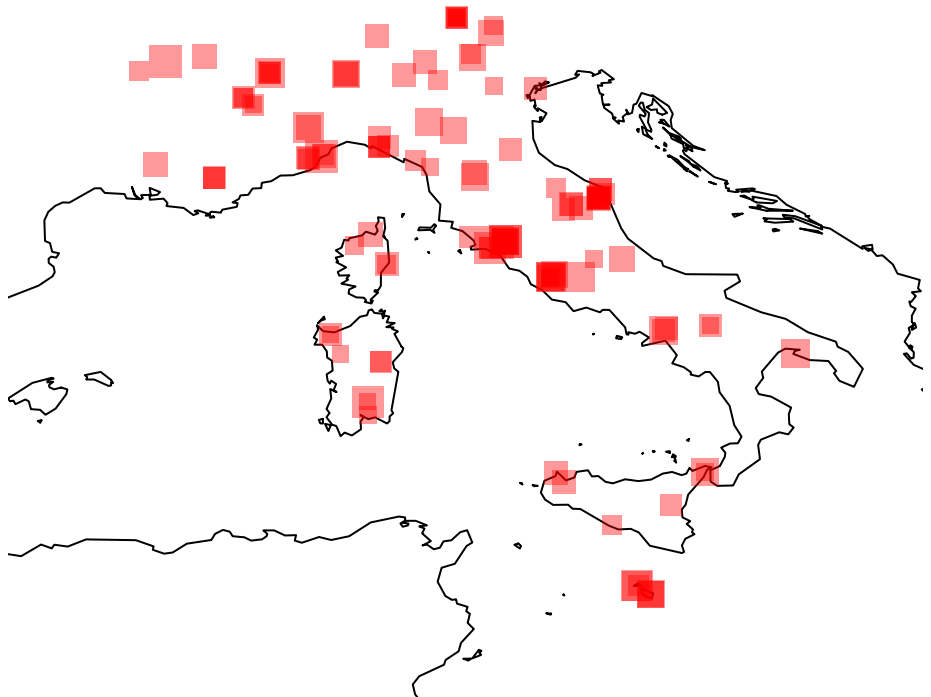

3600 cal. BC

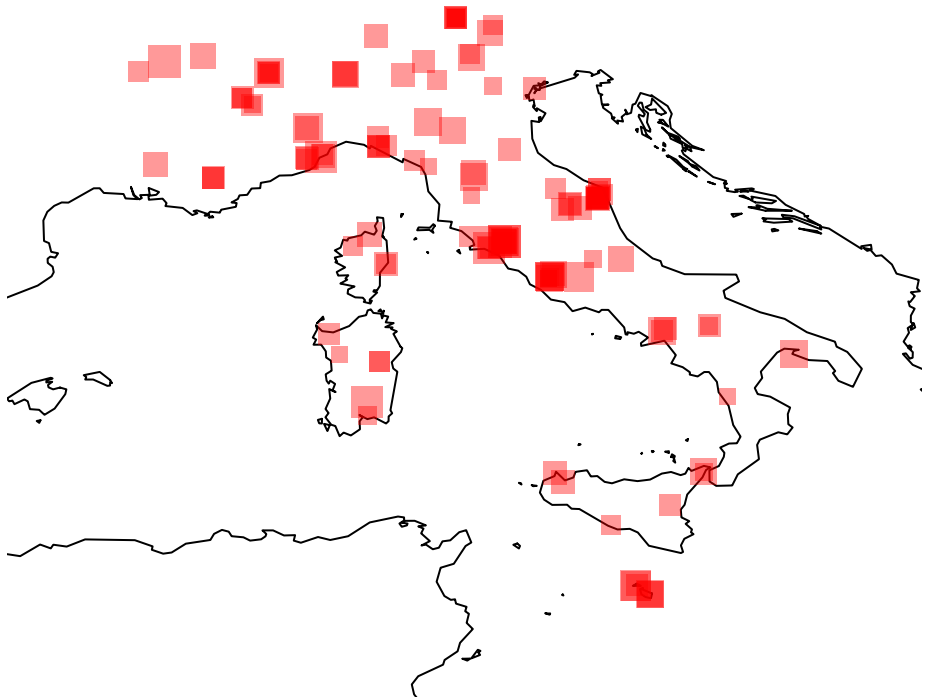

3595 cal. BC

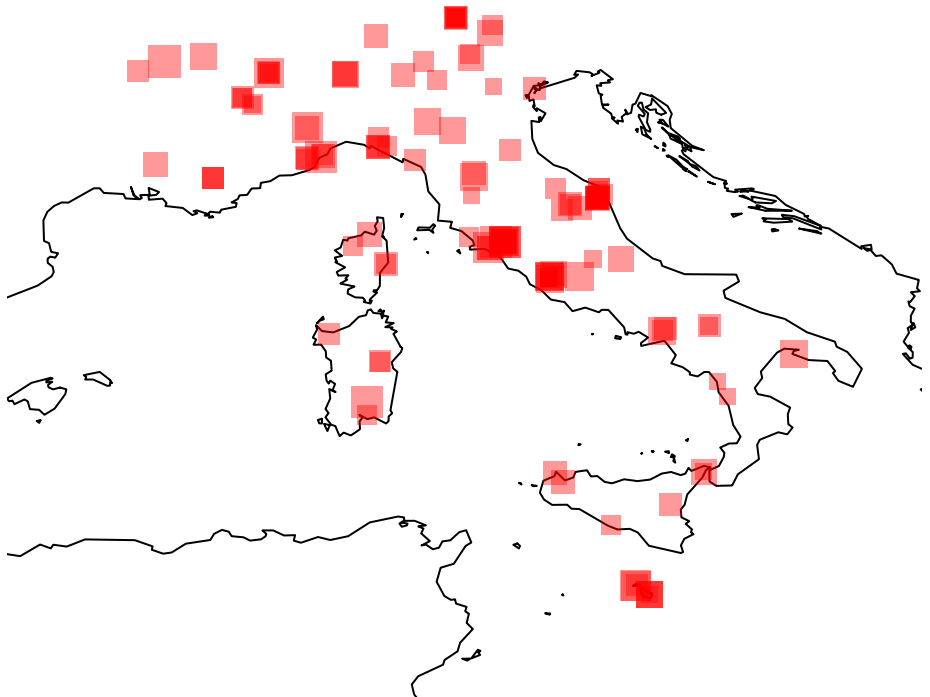

3590 cal. BC

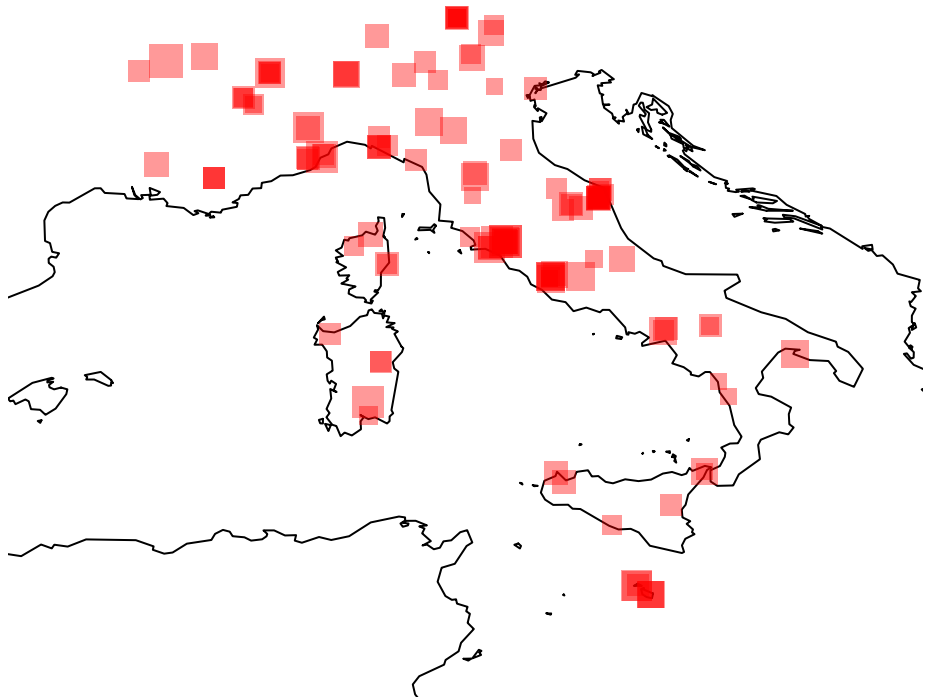

3585 cal. BC

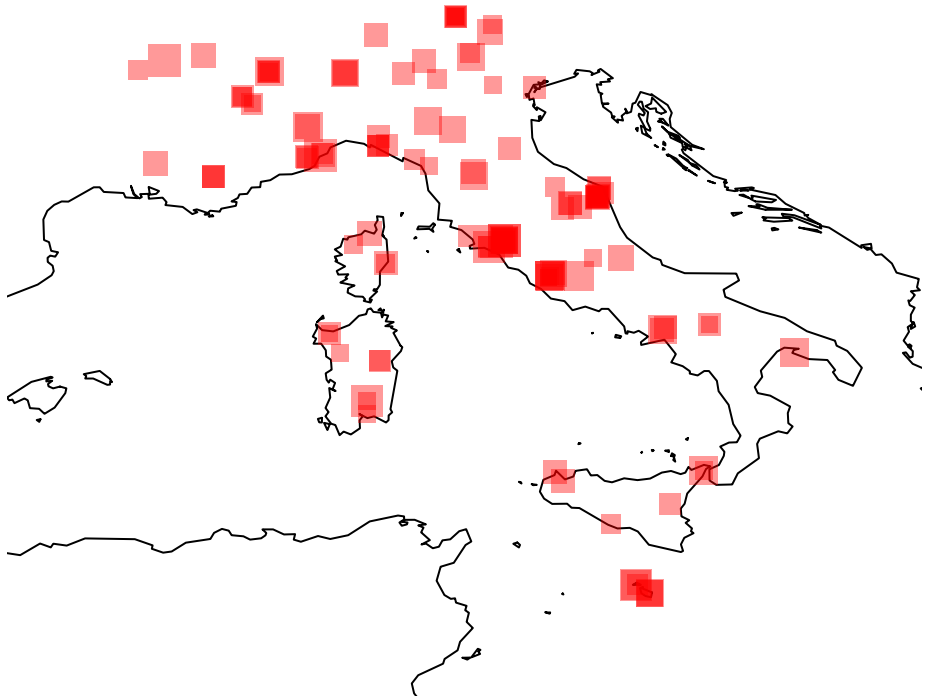

3580 cal. BC

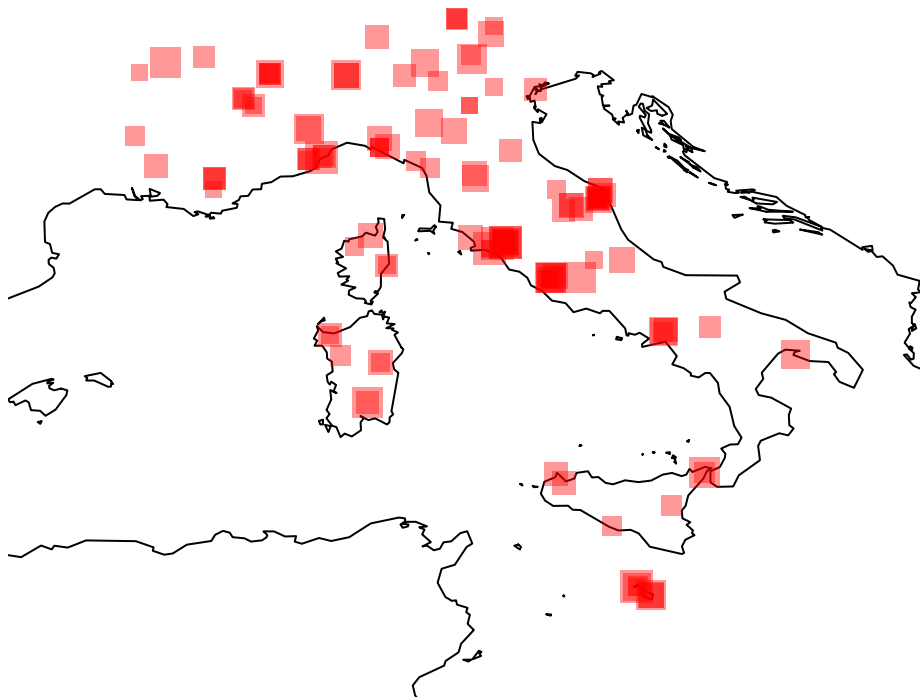

3575 cal. BC

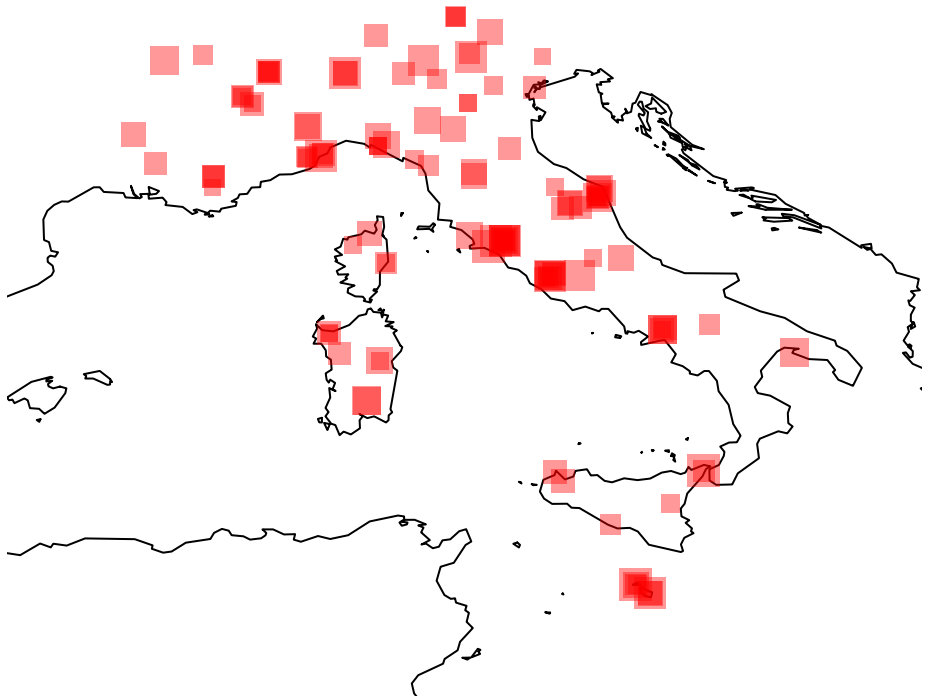

3570 cal. BC





3565 cal. BC

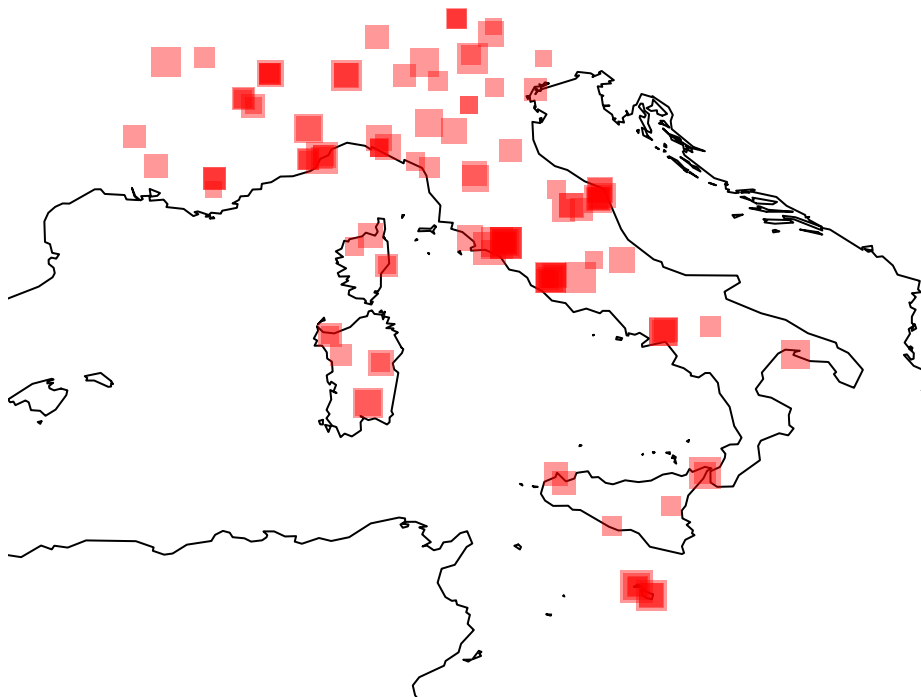

3560 cal. BC

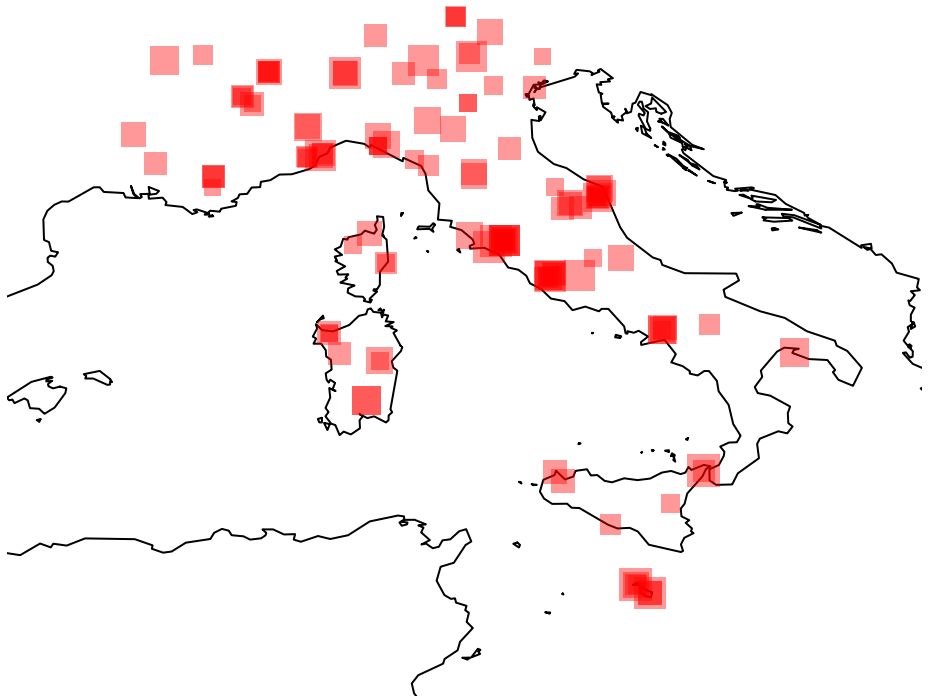

3555 cal. BC

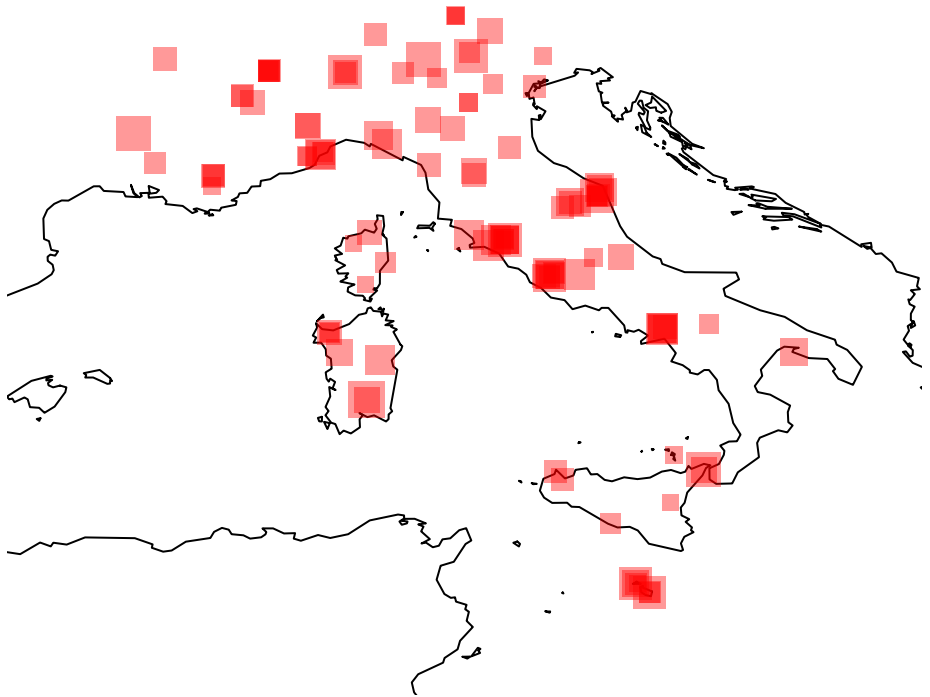

3550 cal. BC

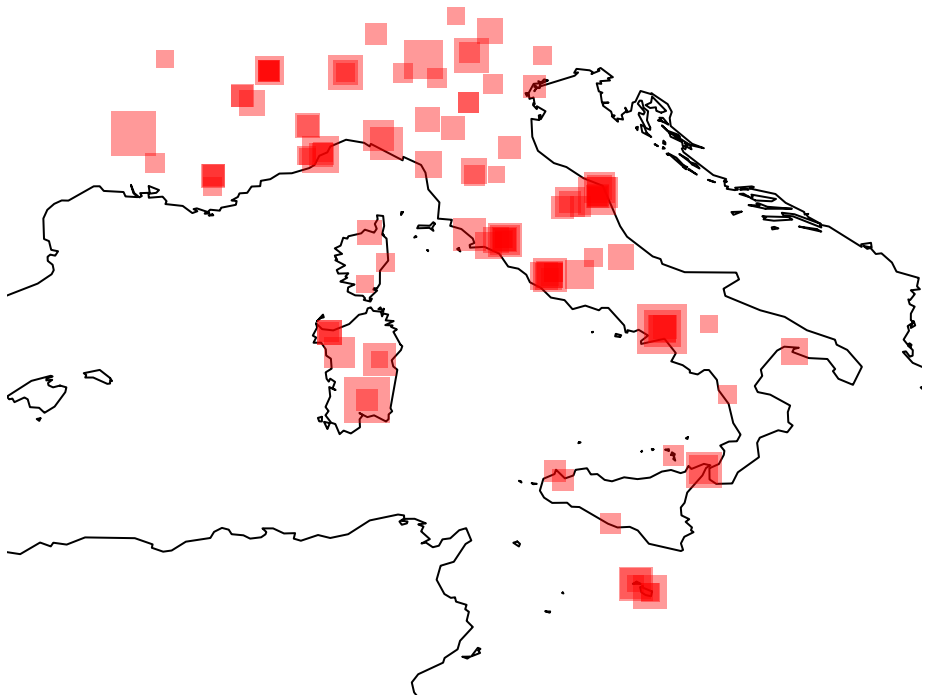

3545 cal. BC

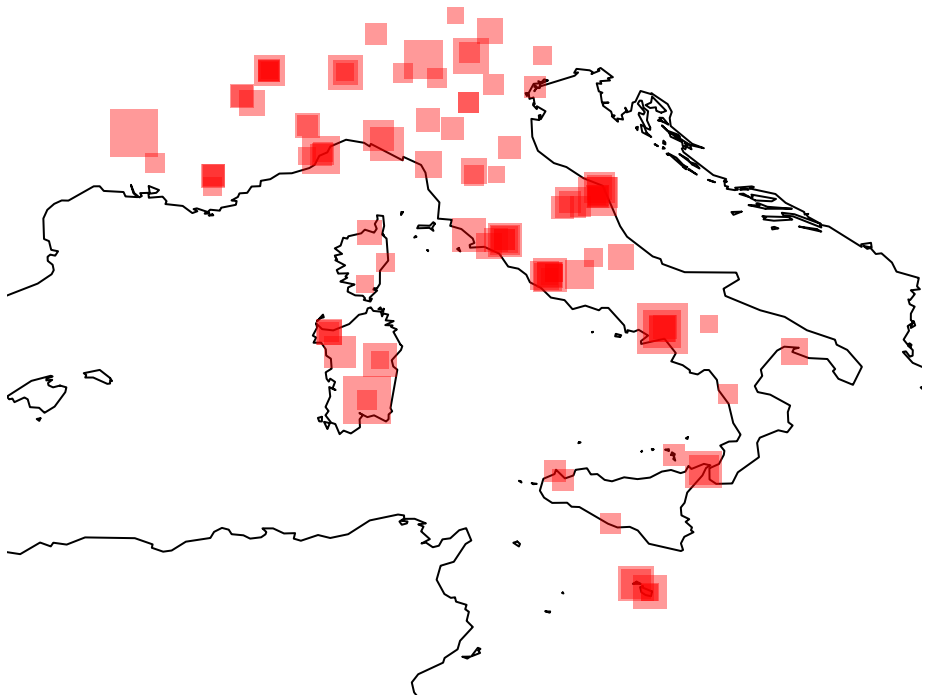

3540 cal. BC

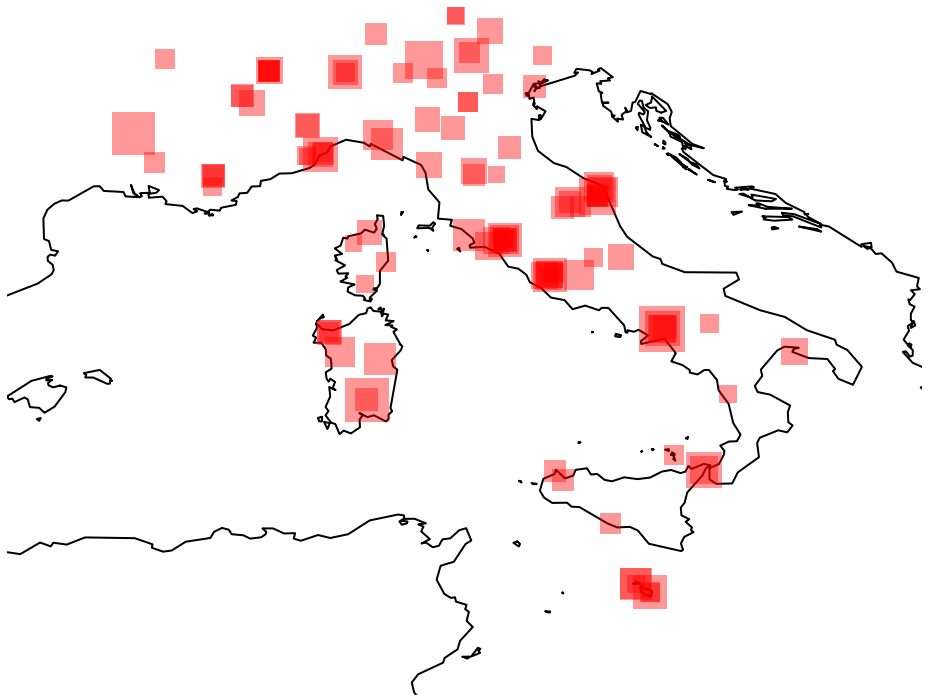

3535 cal. BC

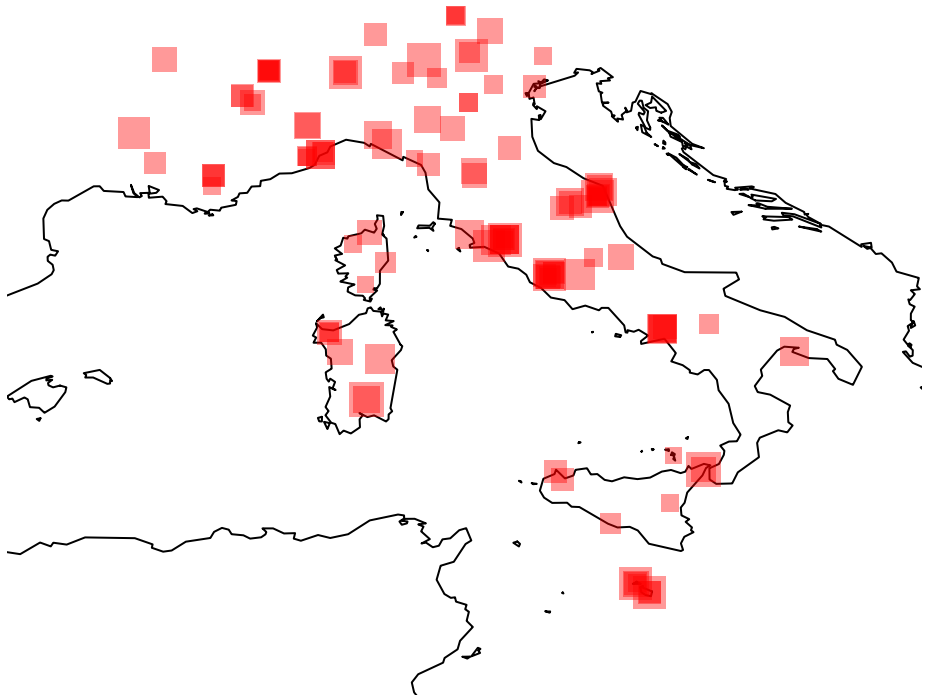

3530 cal. BC

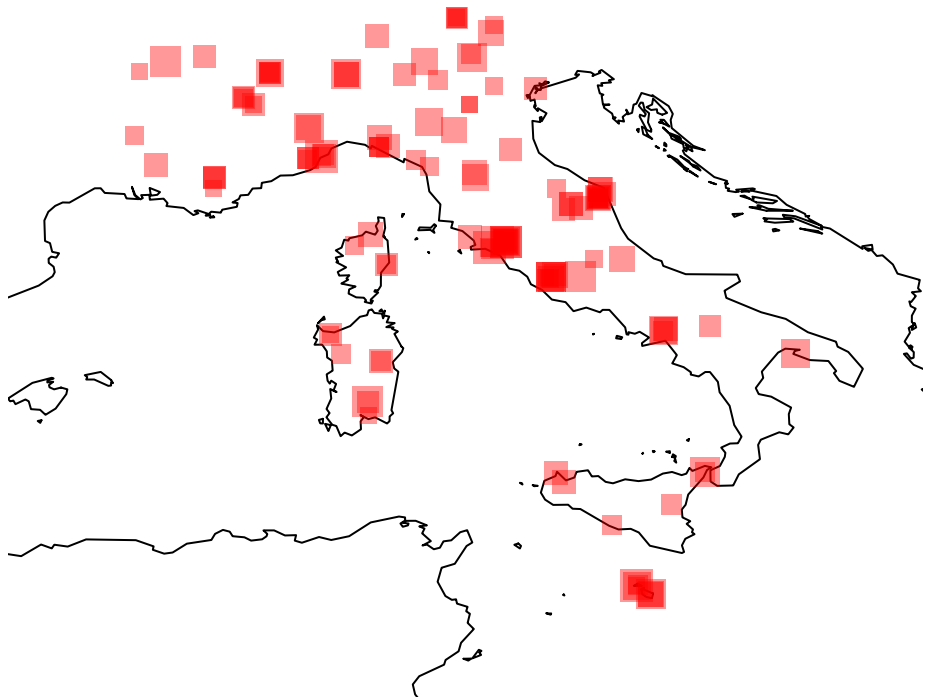



3525 cal. BC

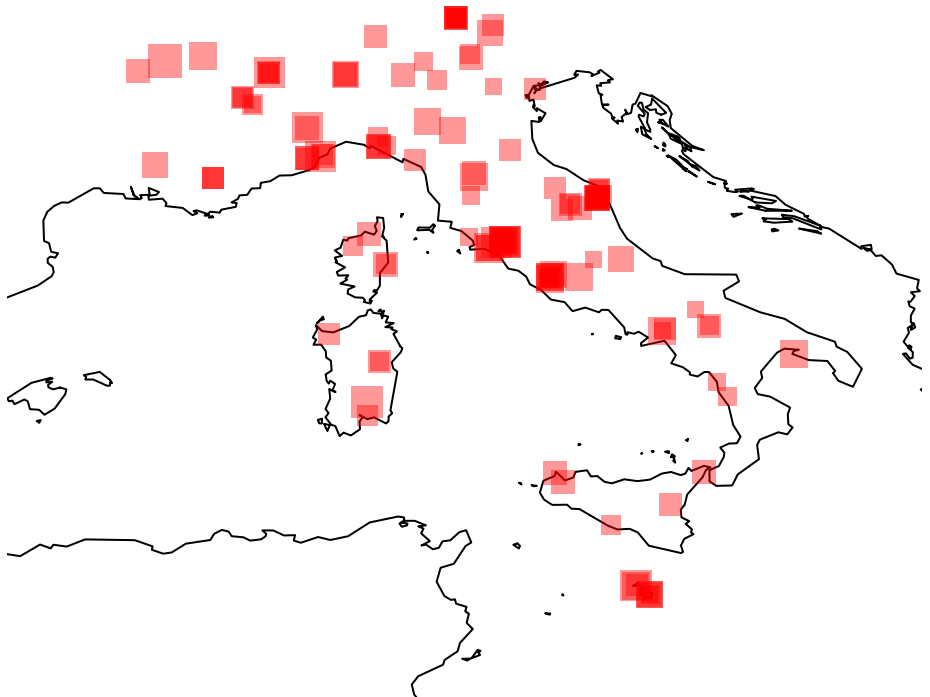

3520 cal. BC

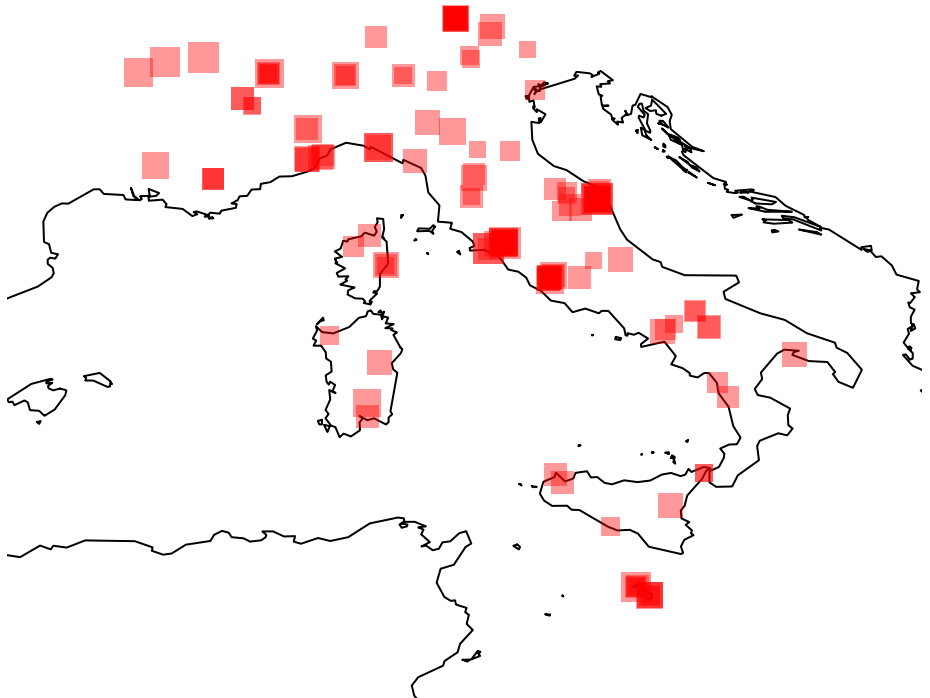

3515 cal. BC

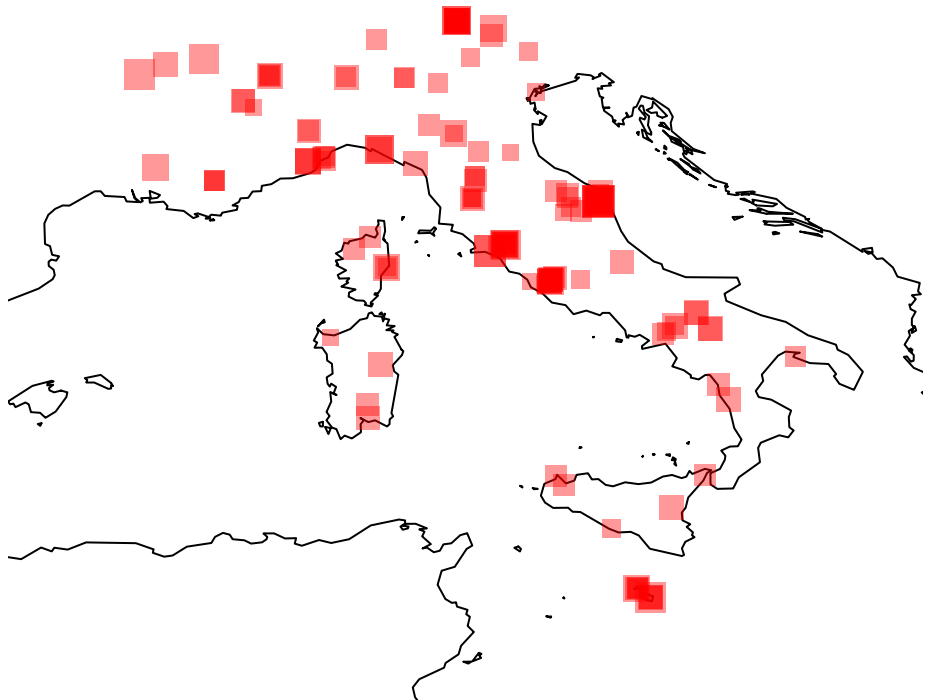

3510 cal. BC

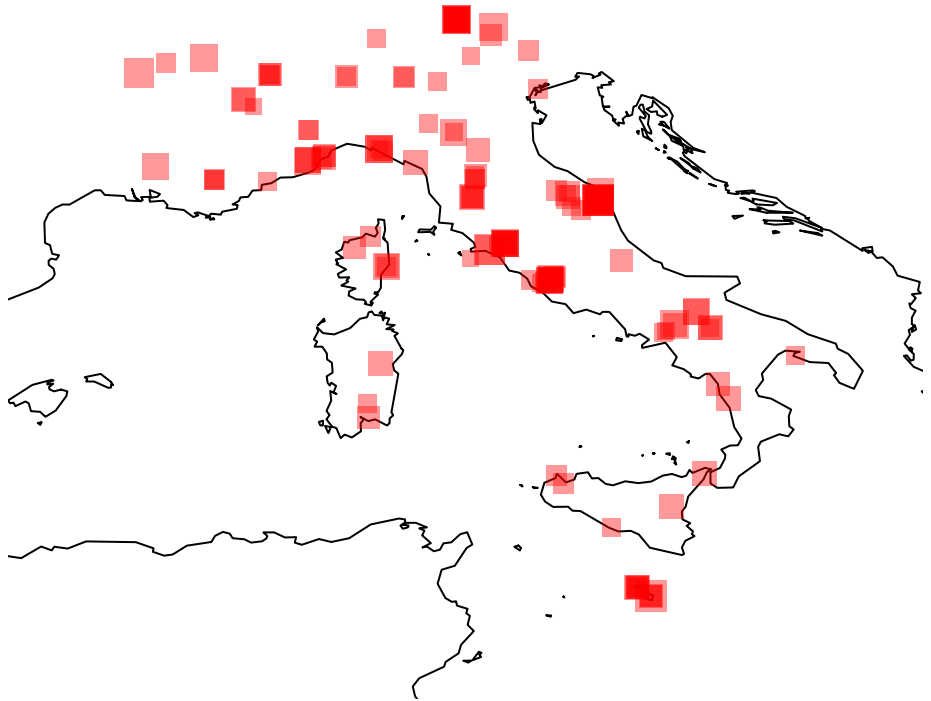

3505 cal. BC

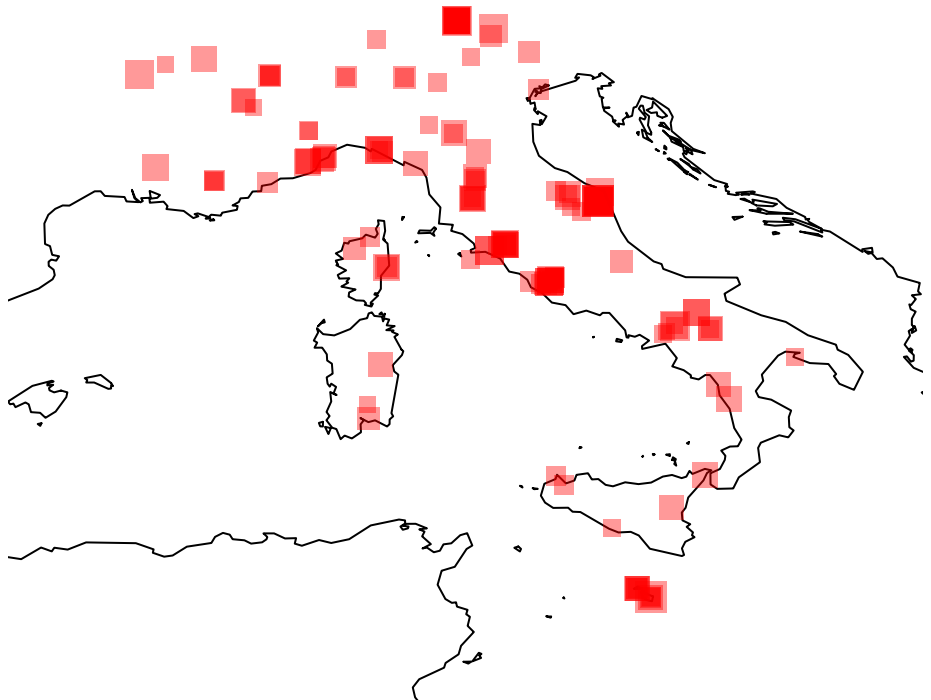

3500 cal. BC

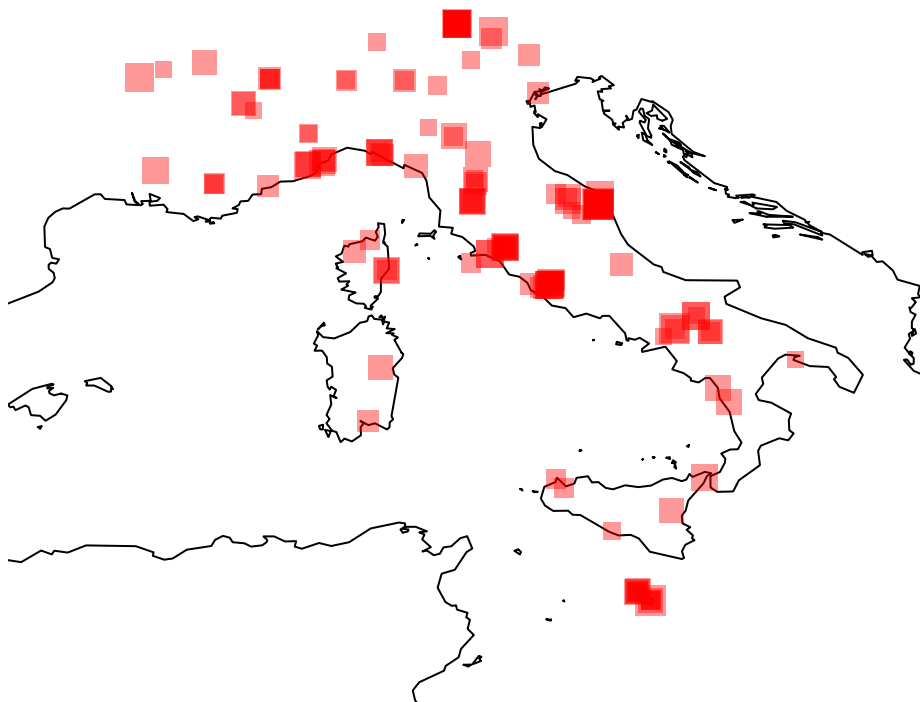

3495 cal. BC

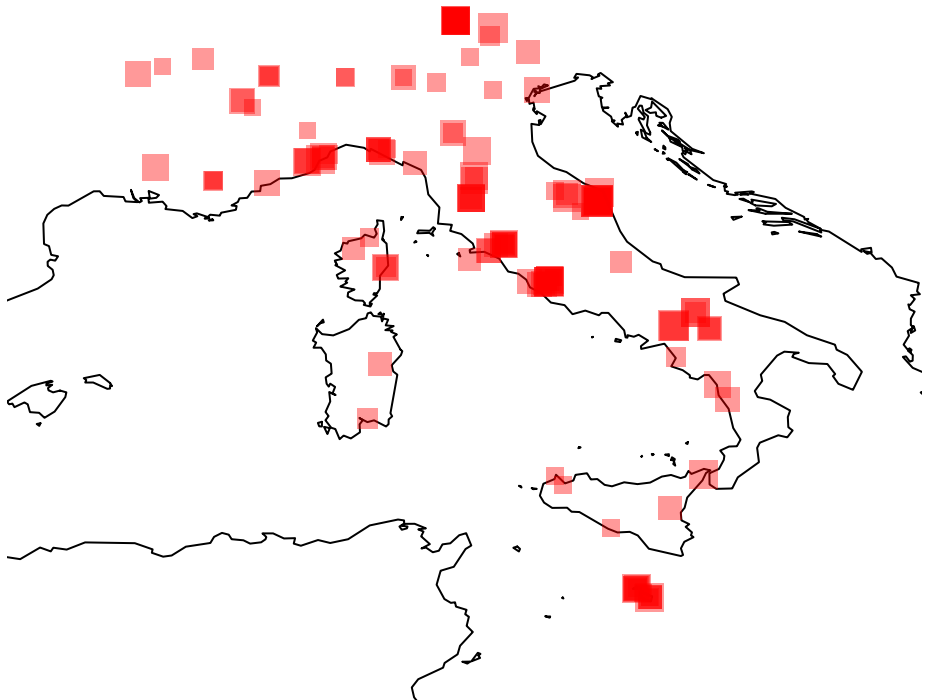

3490 cal. BC

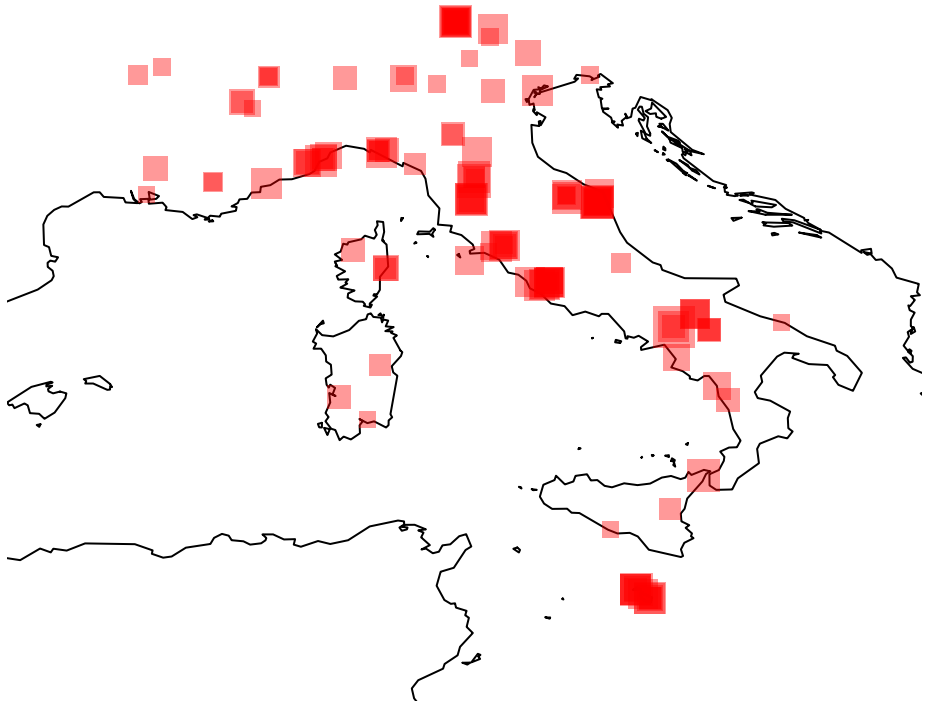



3485 cal. BC

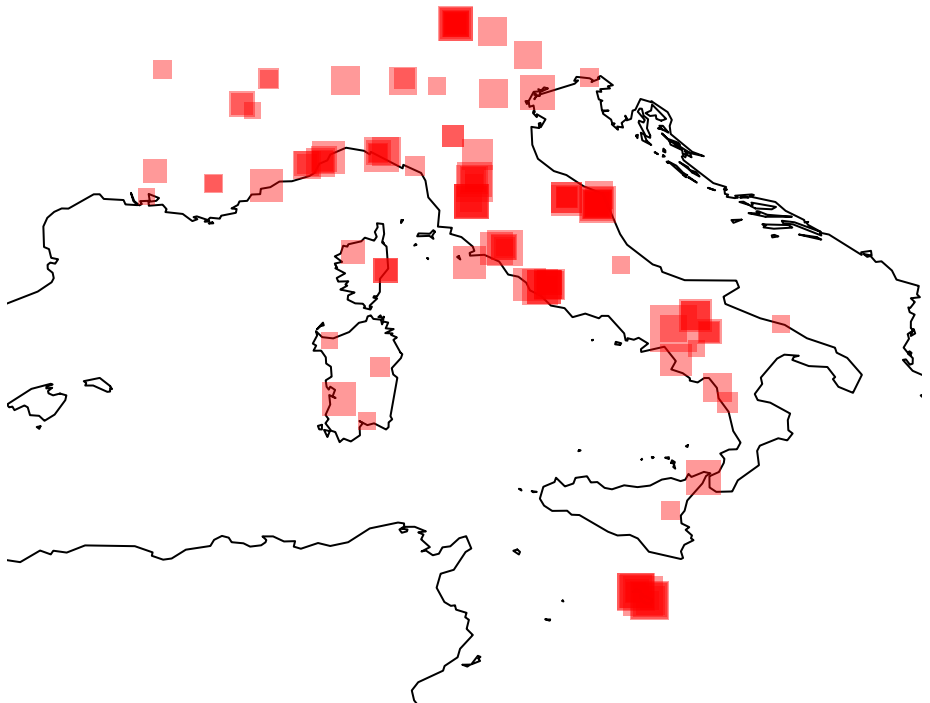

3480 cal. BC

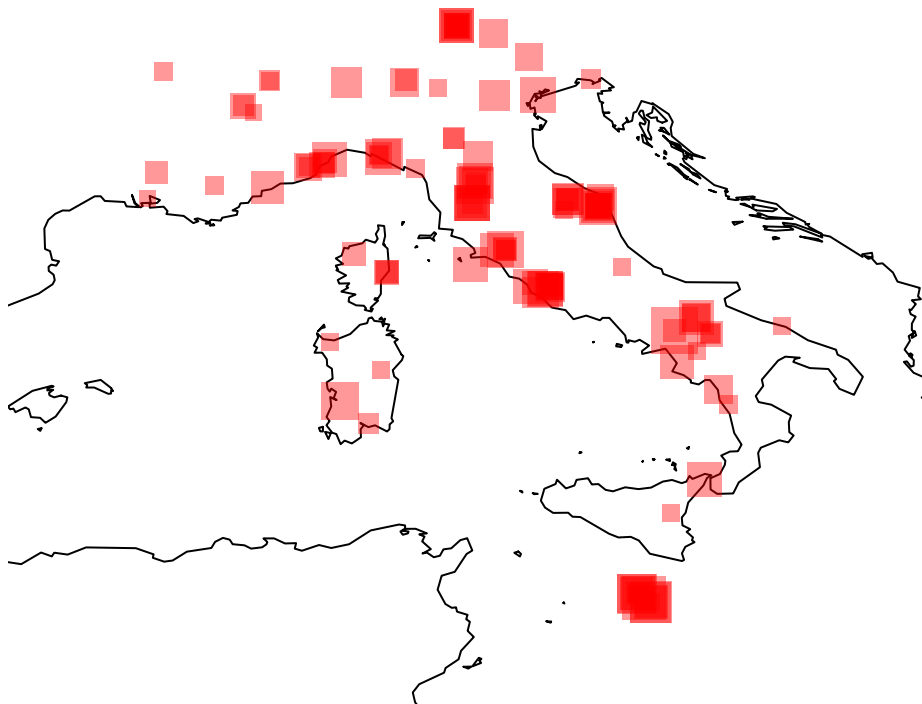

3475 cal. BC

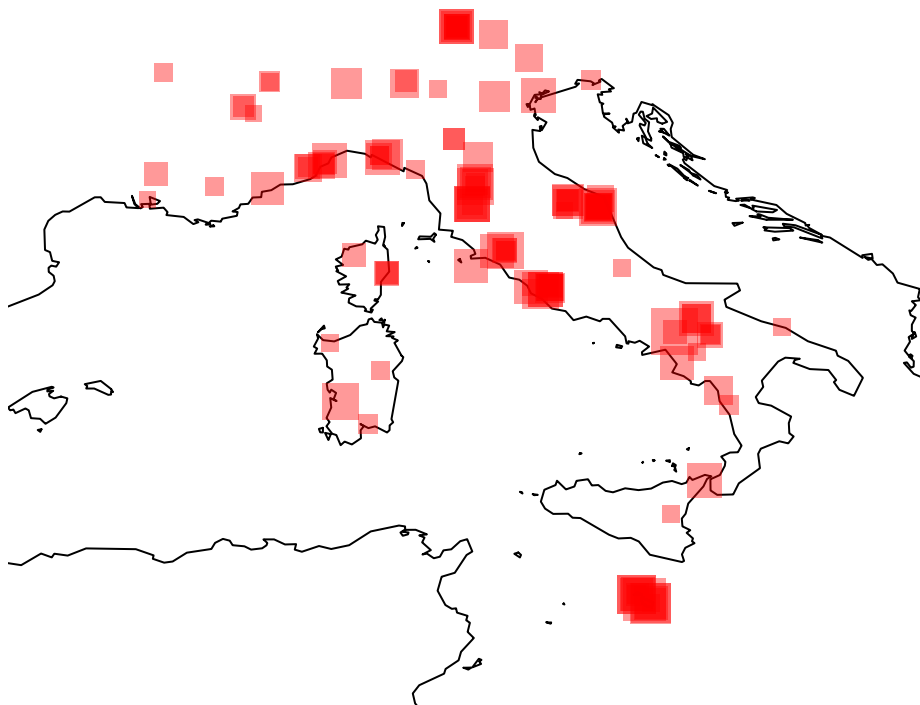

3470 cal. BC

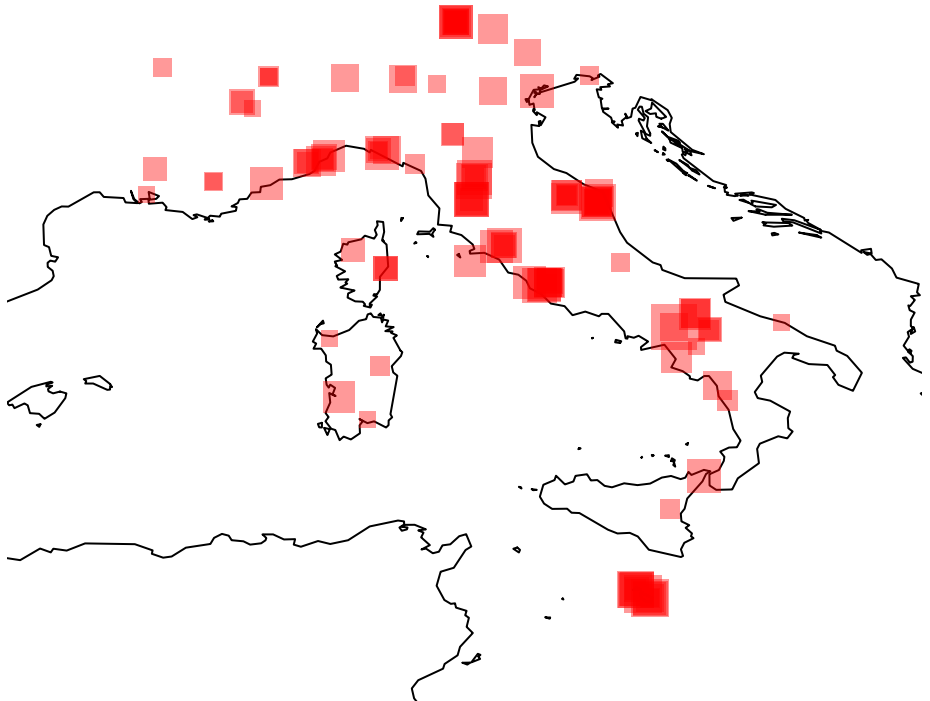

3465 cal. BC

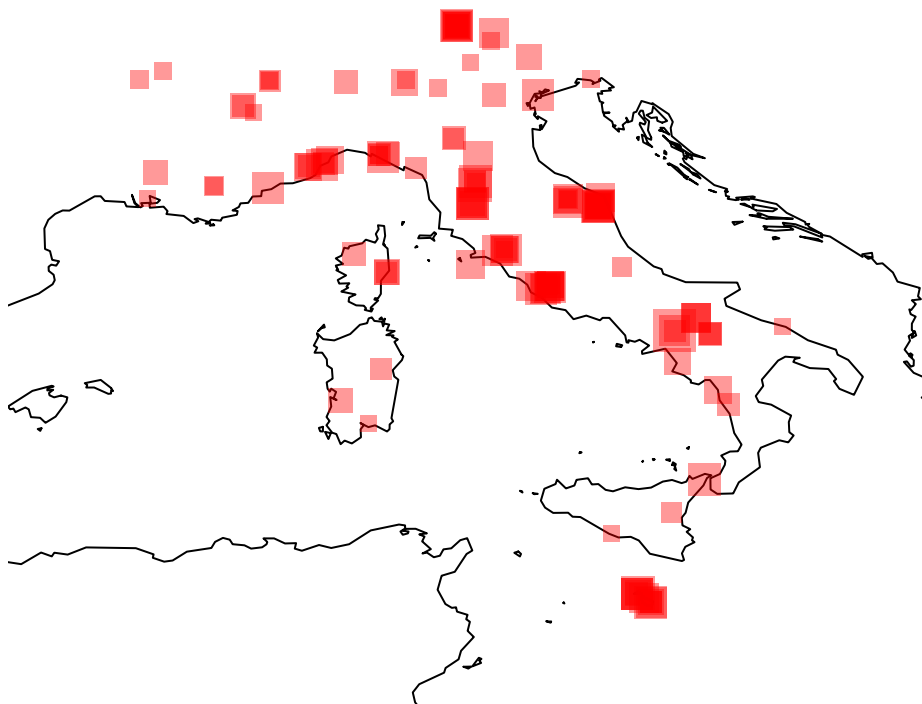

3460 cal. BC

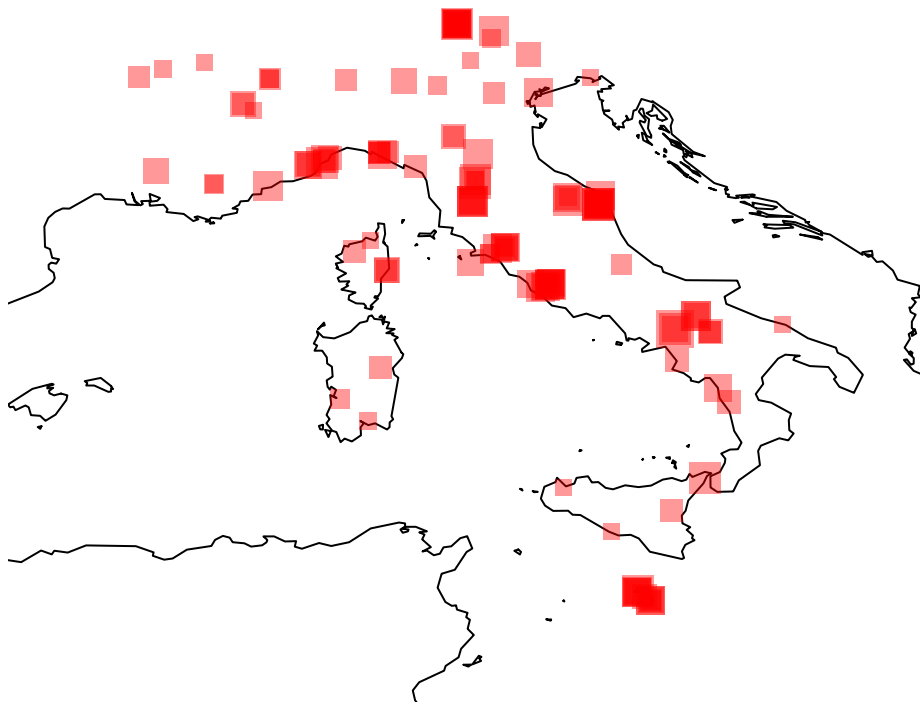

3455 cal. BC

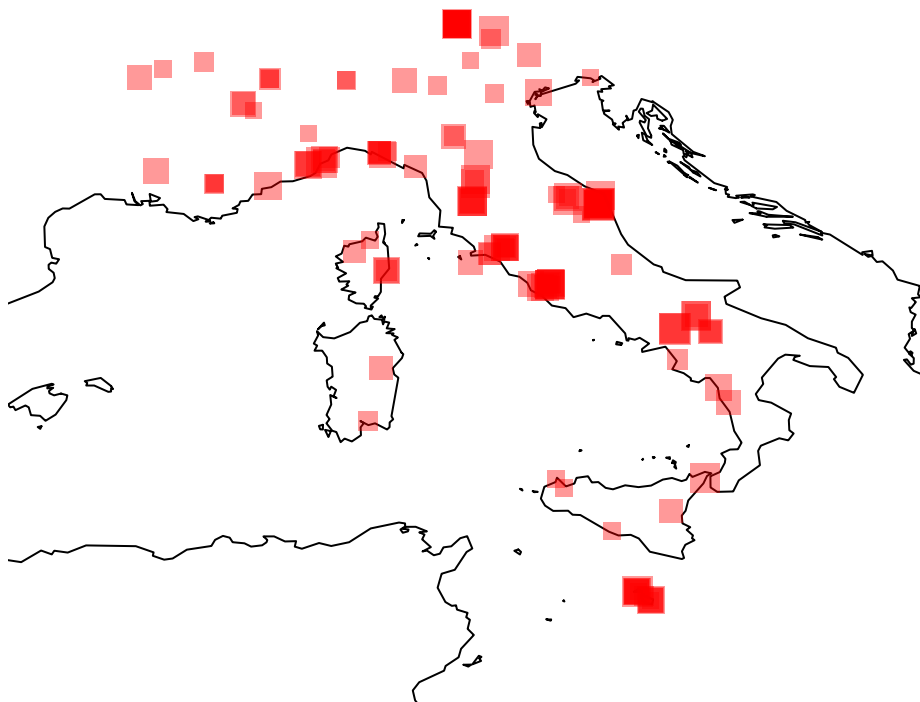

3450 cal. BC

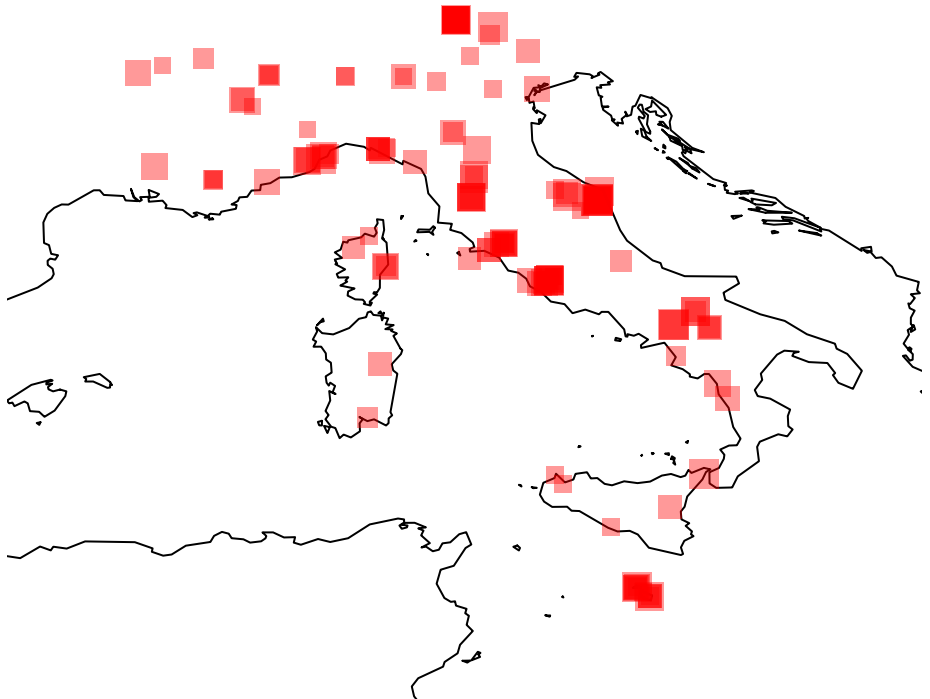



3445 cal. BC

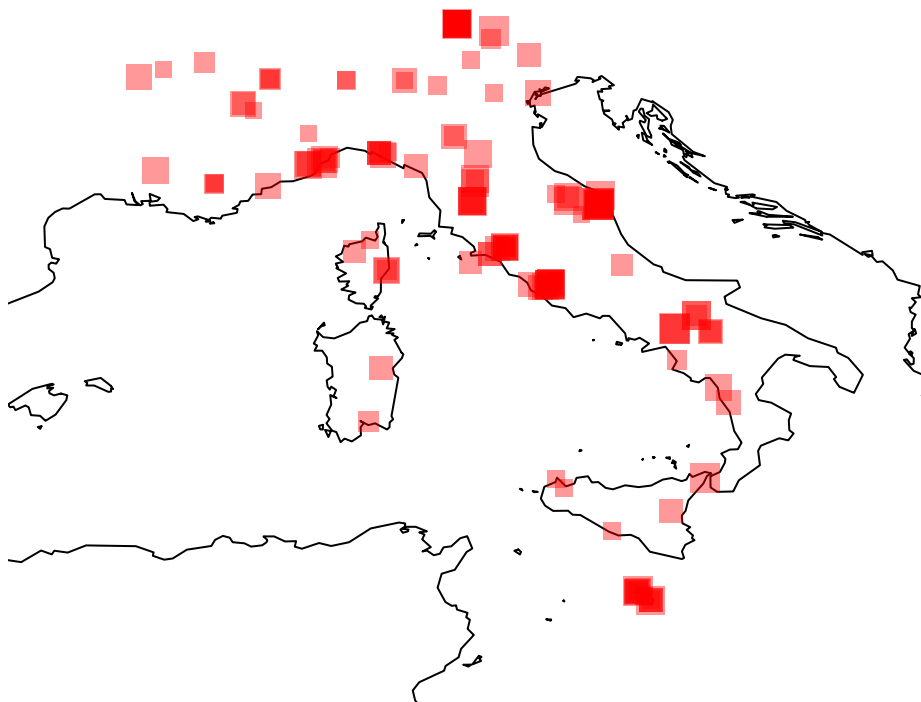

3440 cal. BC

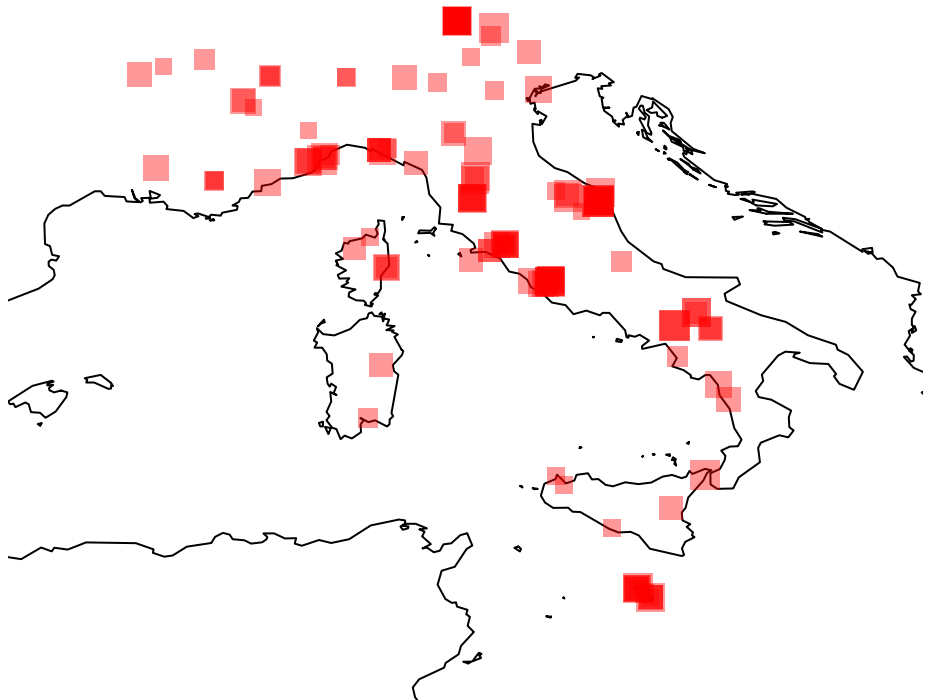

3435 cal. BC

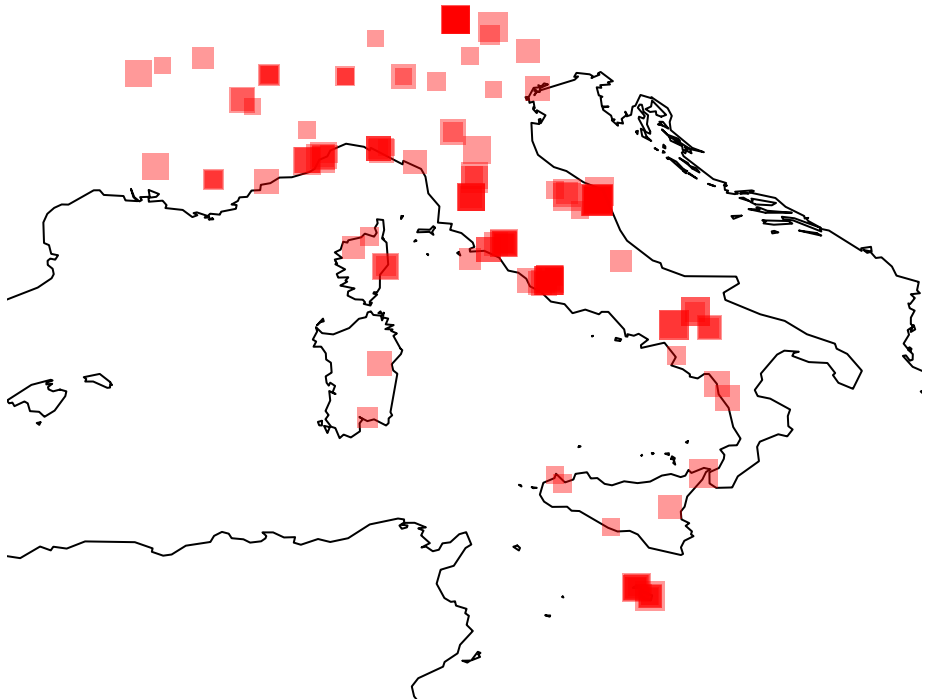

3430 cal. BC

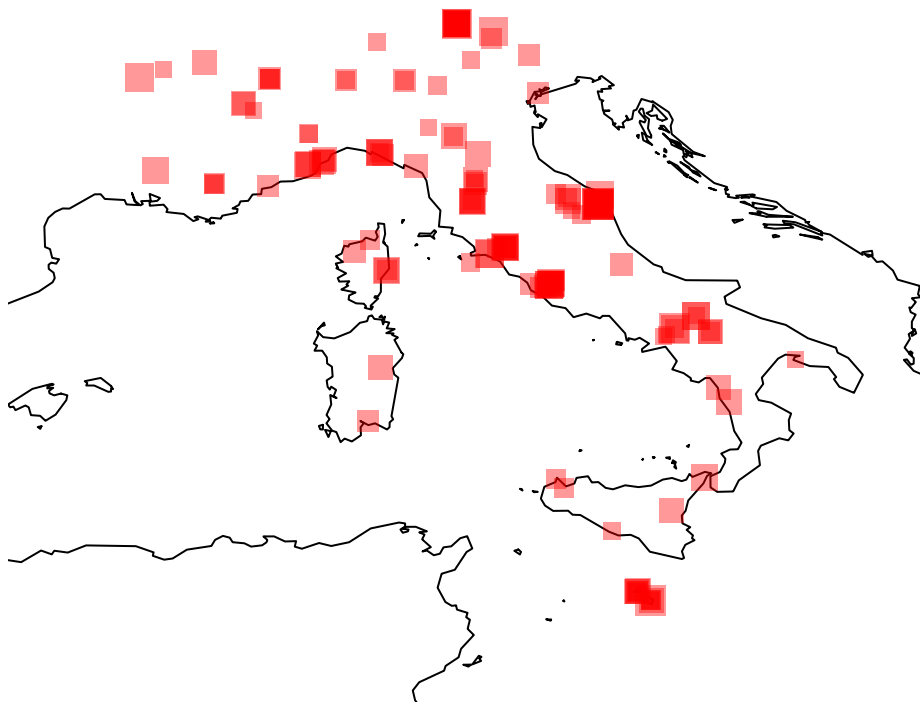

3425 cal. BC

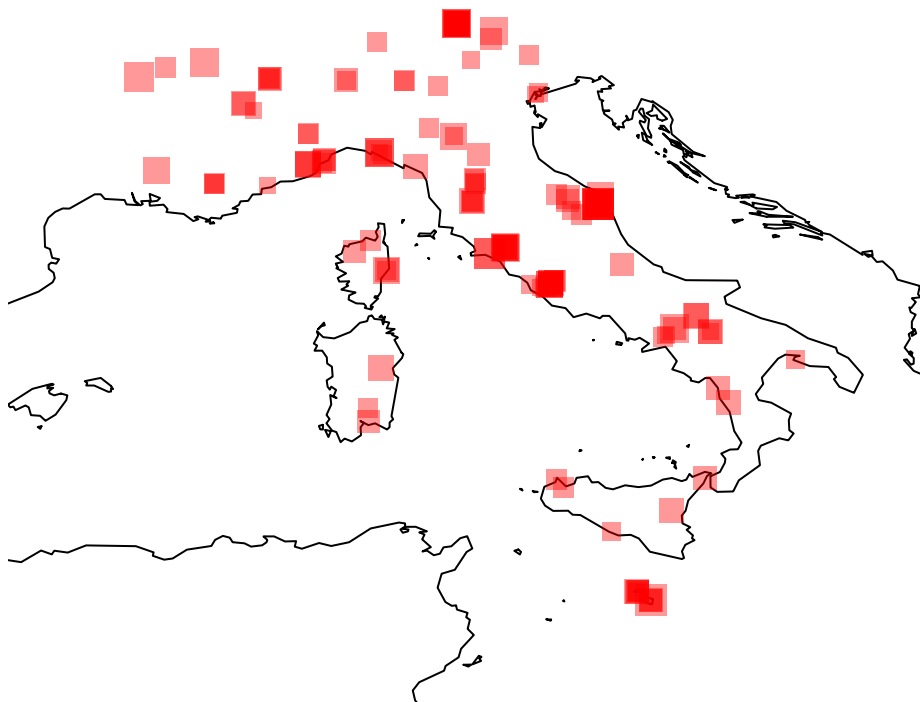

3420 cal. BC

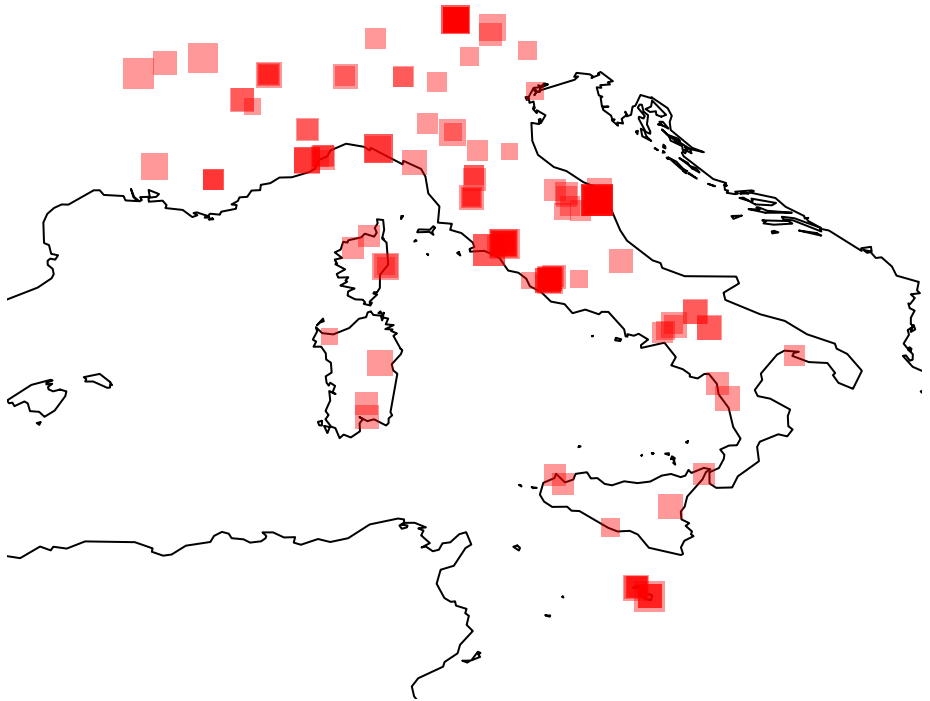

3415 cal. BC

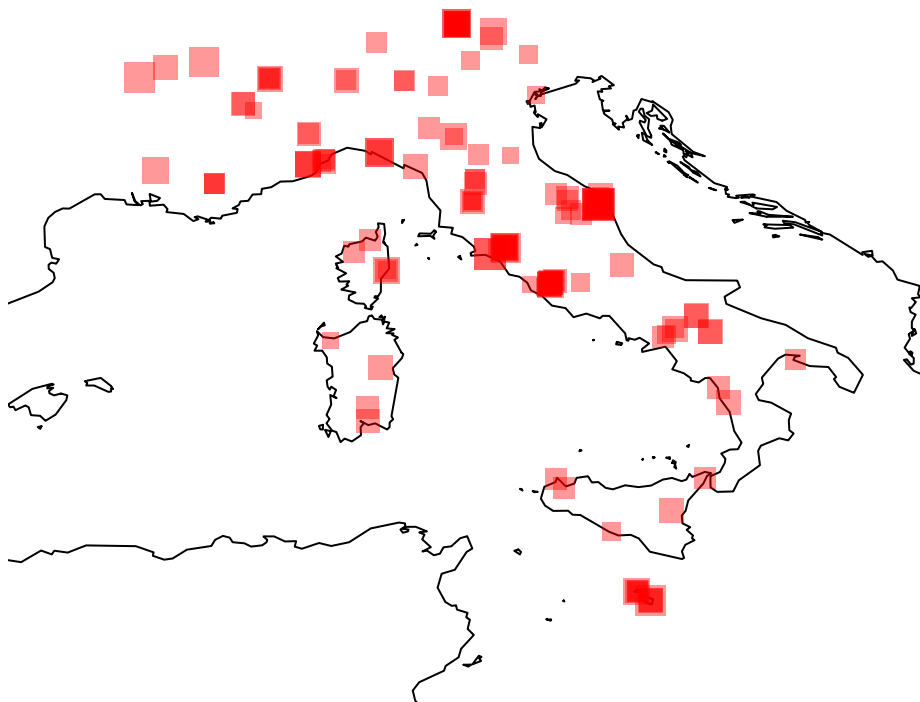

3410 cal. BC

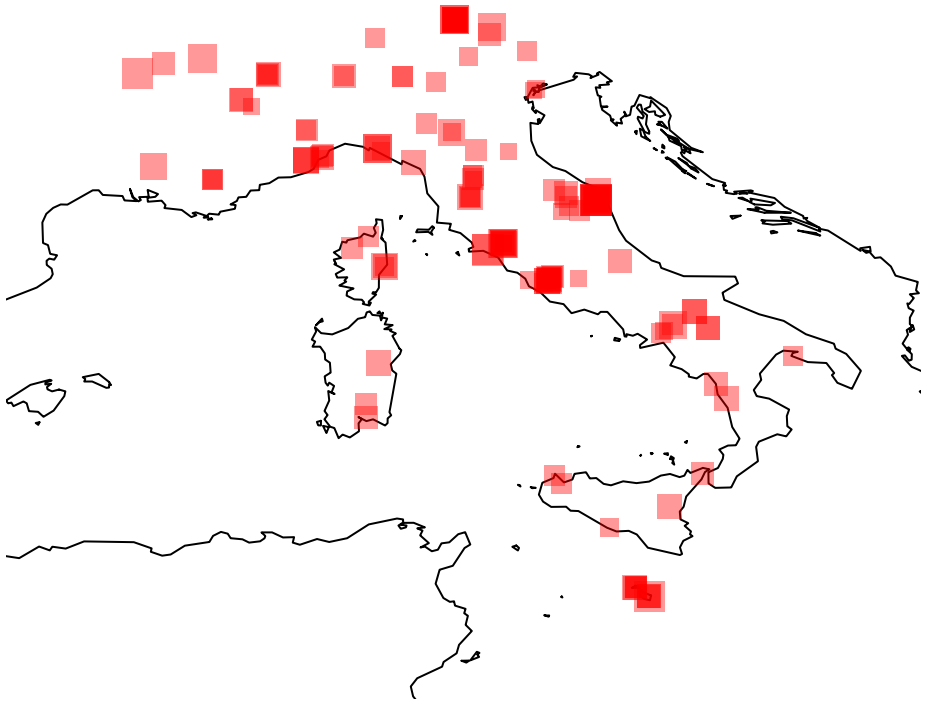



3405 cal. BC

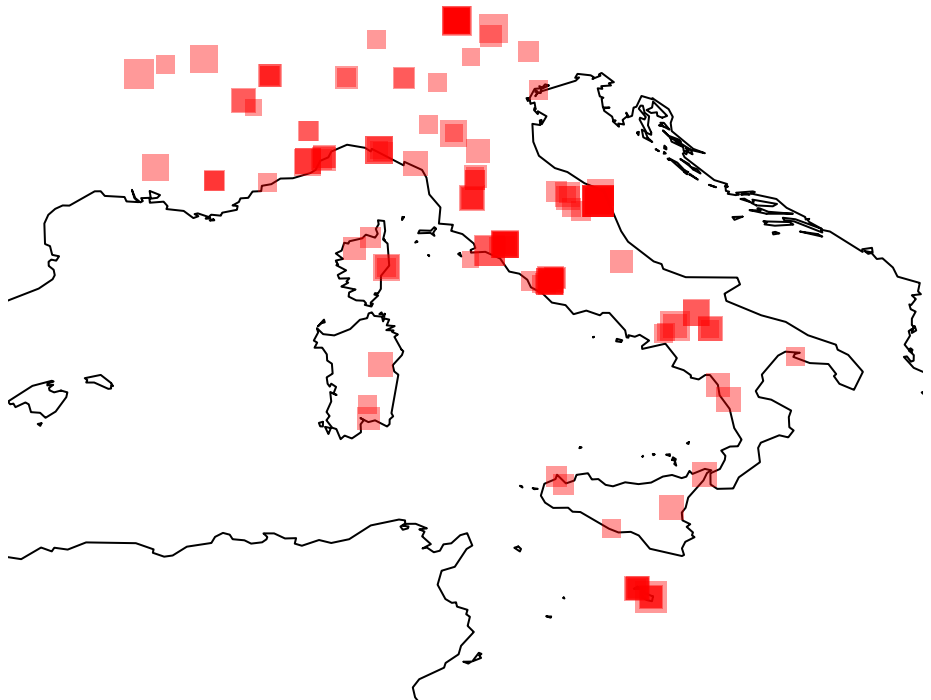

3400 cal. BC

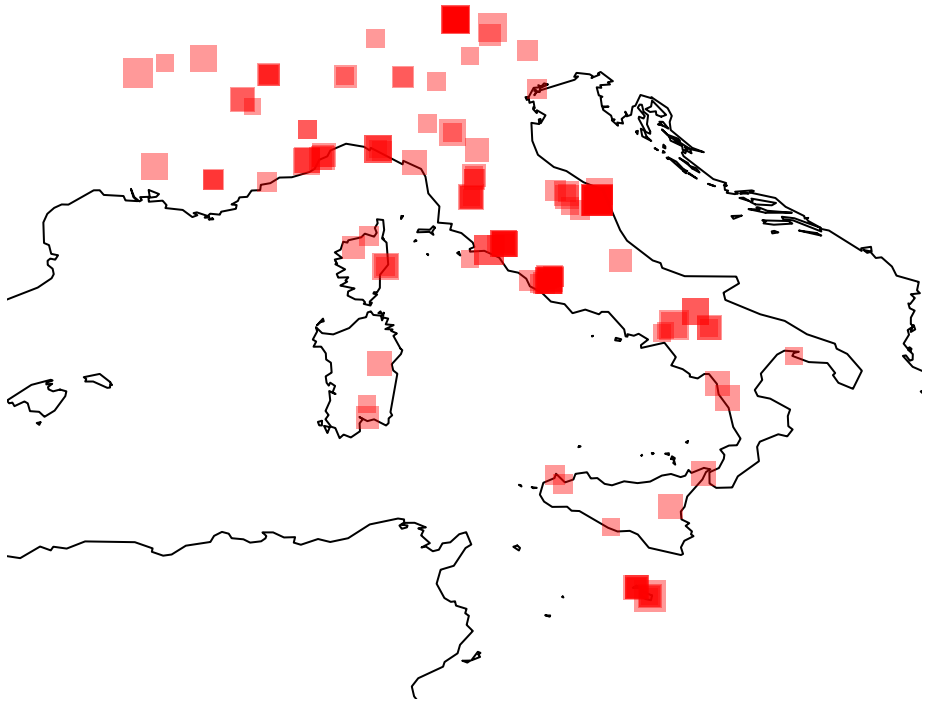

3395 cal. BC

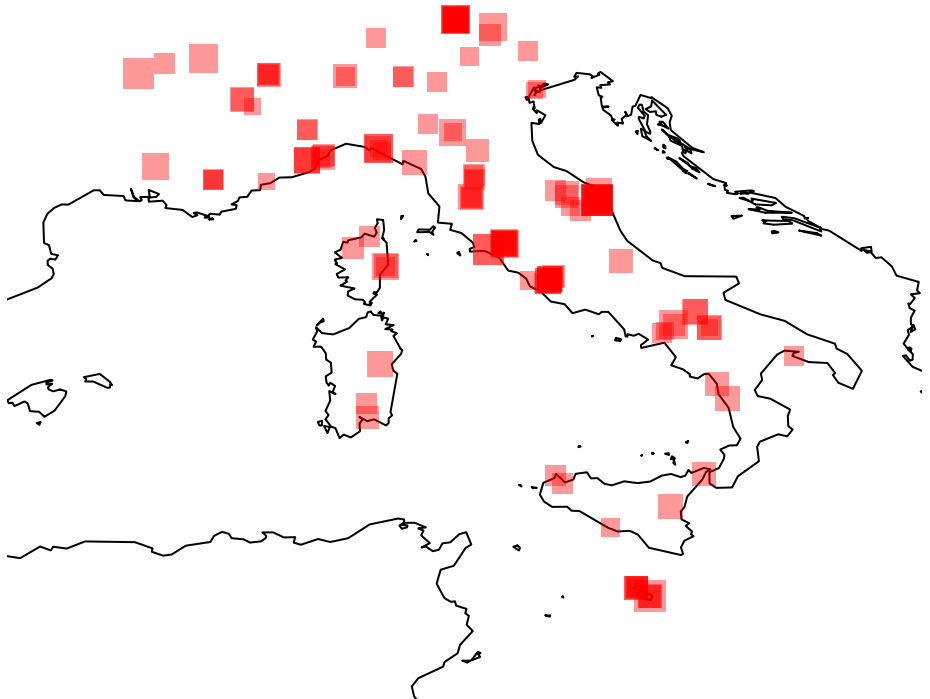

3390 cal. BC

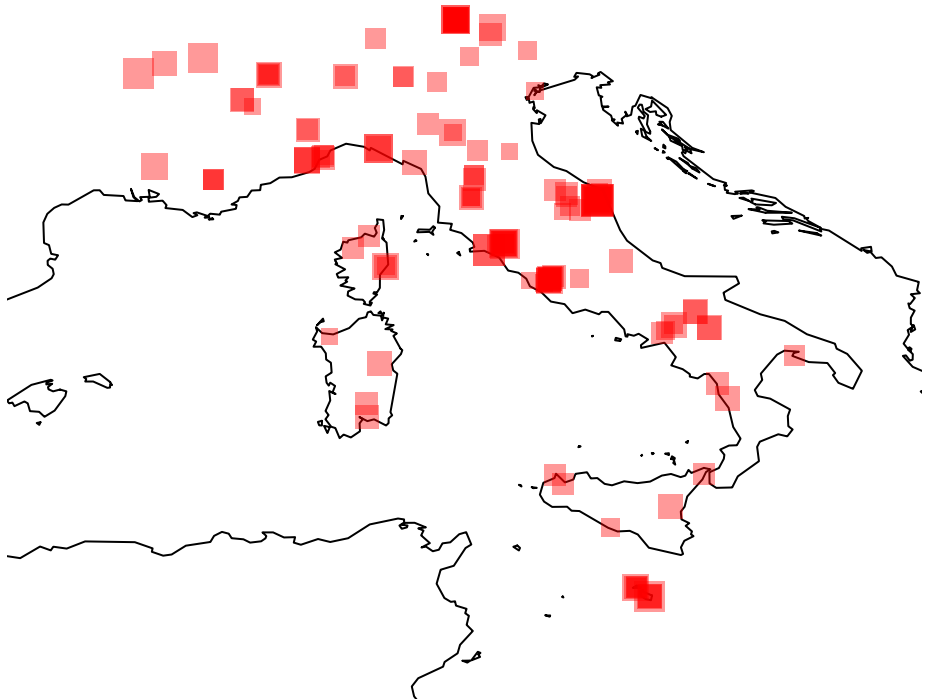

3385 cal. BC



3380 cal. BC

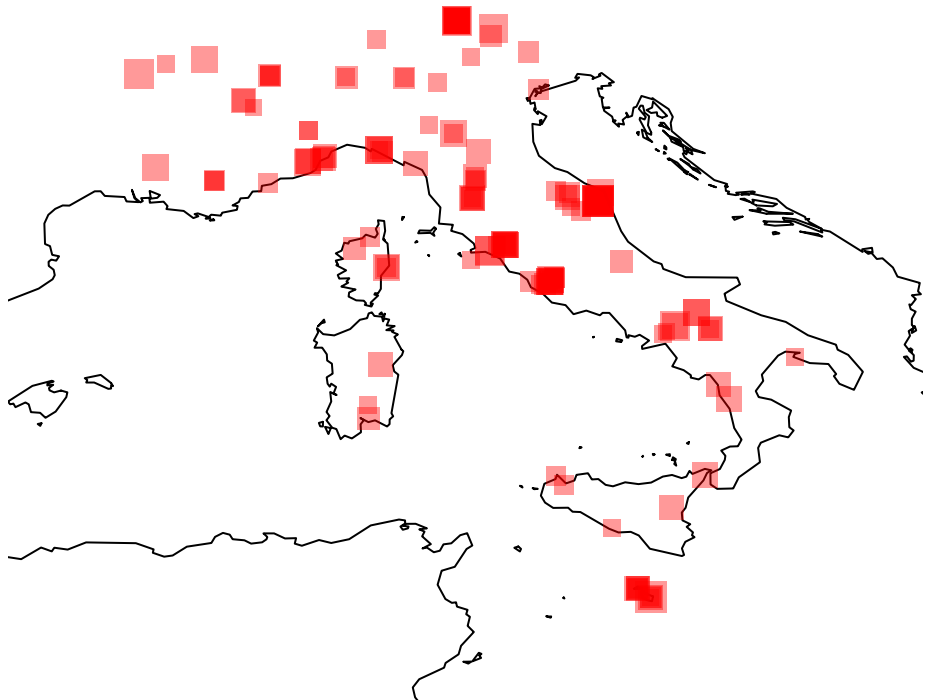

3375 cal. BC

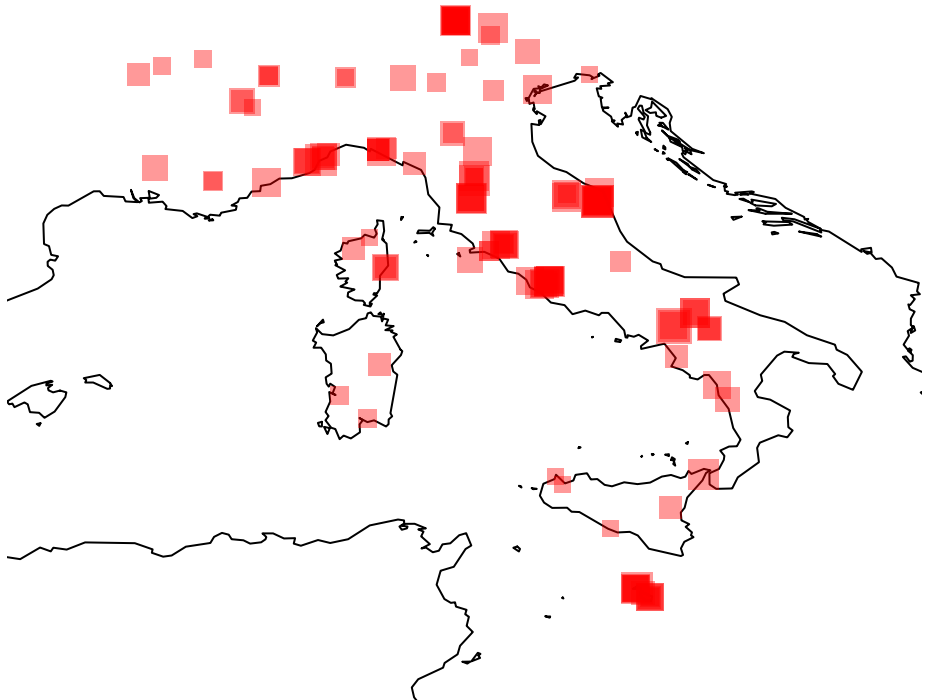

3370 cal. BC

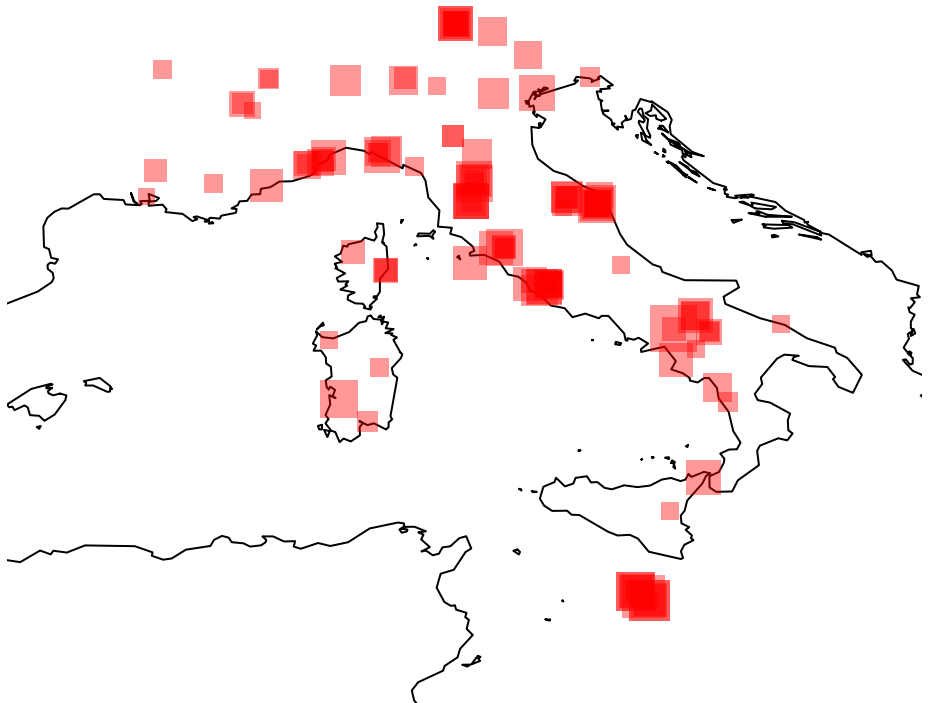



3365 cal. BC

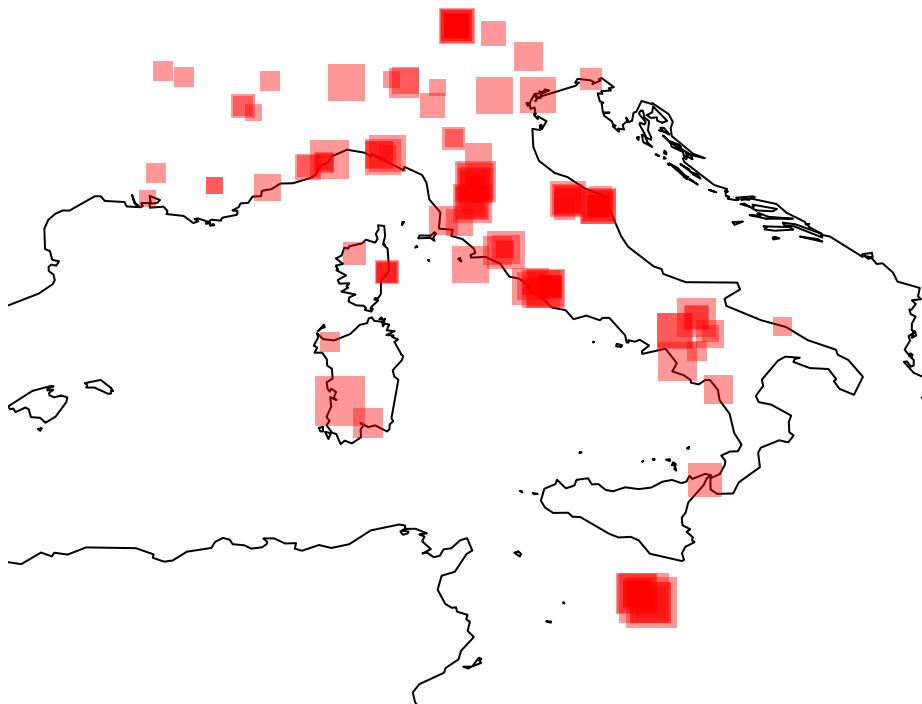

3360 cal. BC

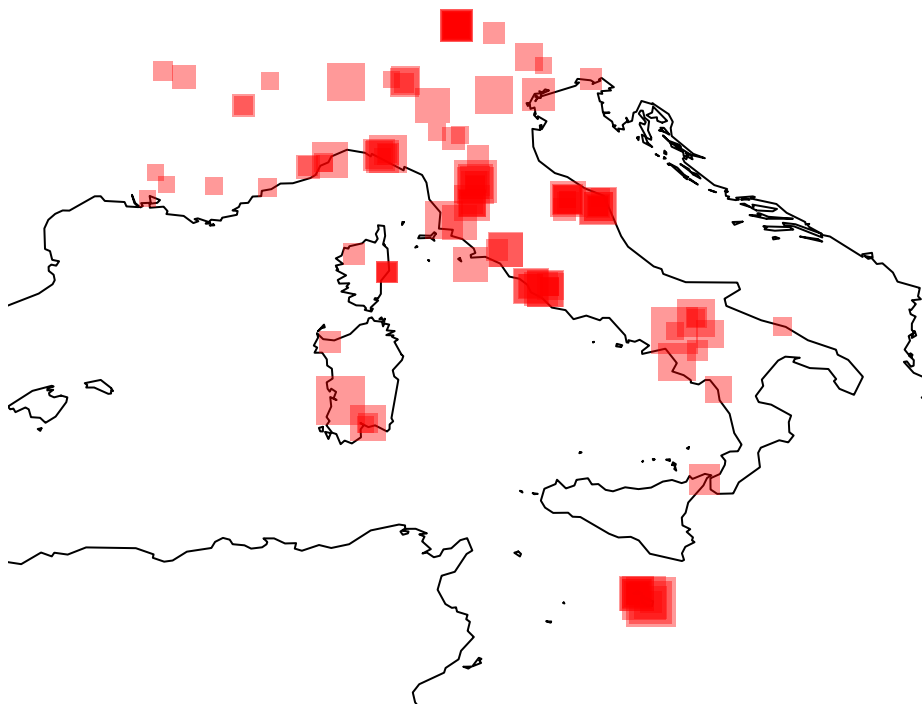

3355 cal. BC

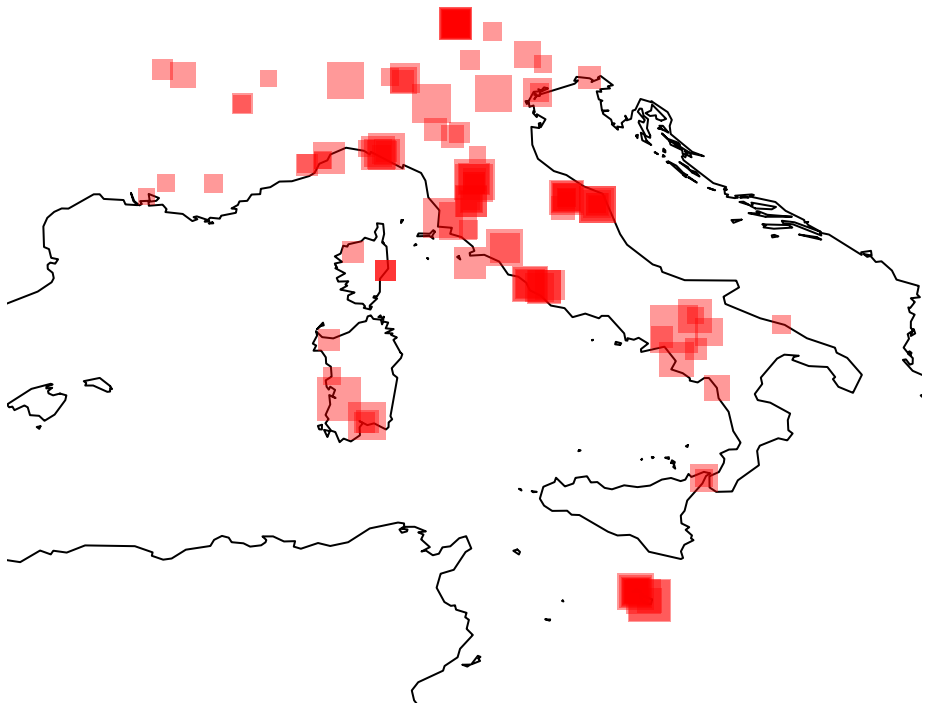

3350 cal. BC

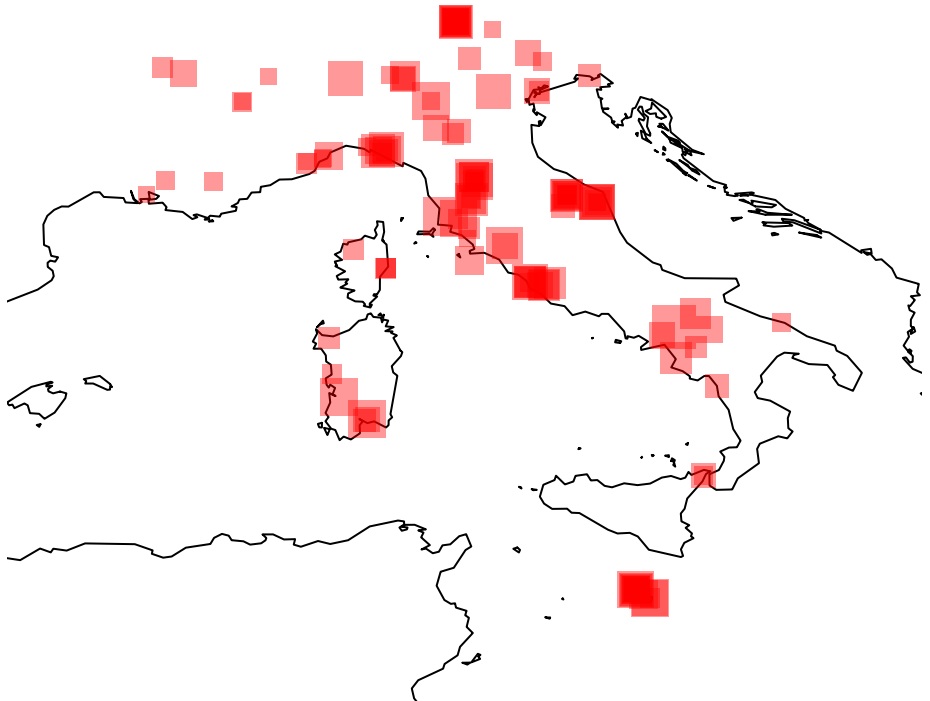

3345 cal. BC

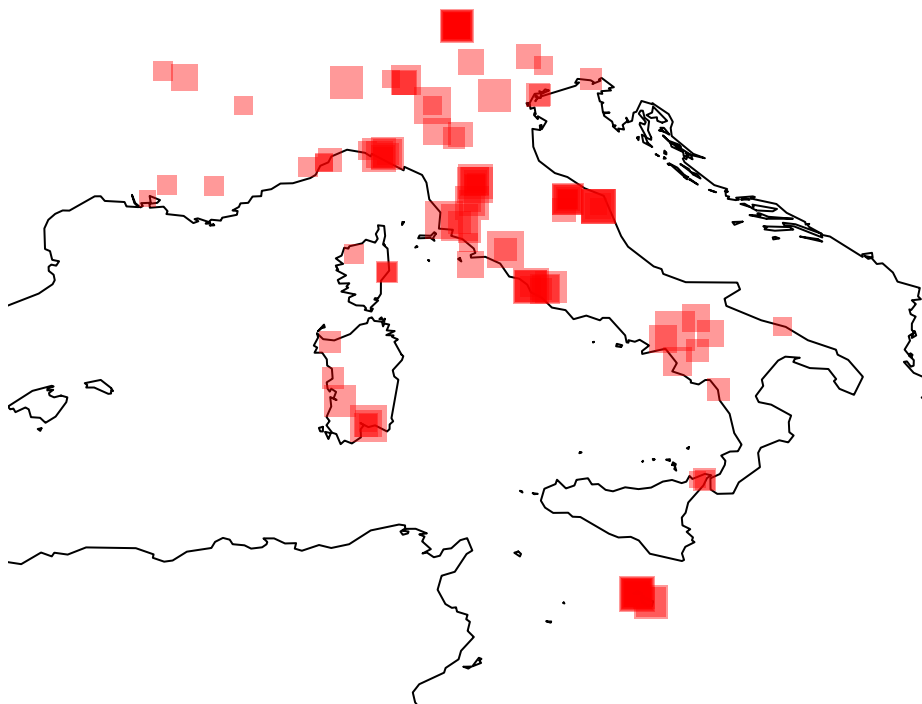

3340 cal. BC

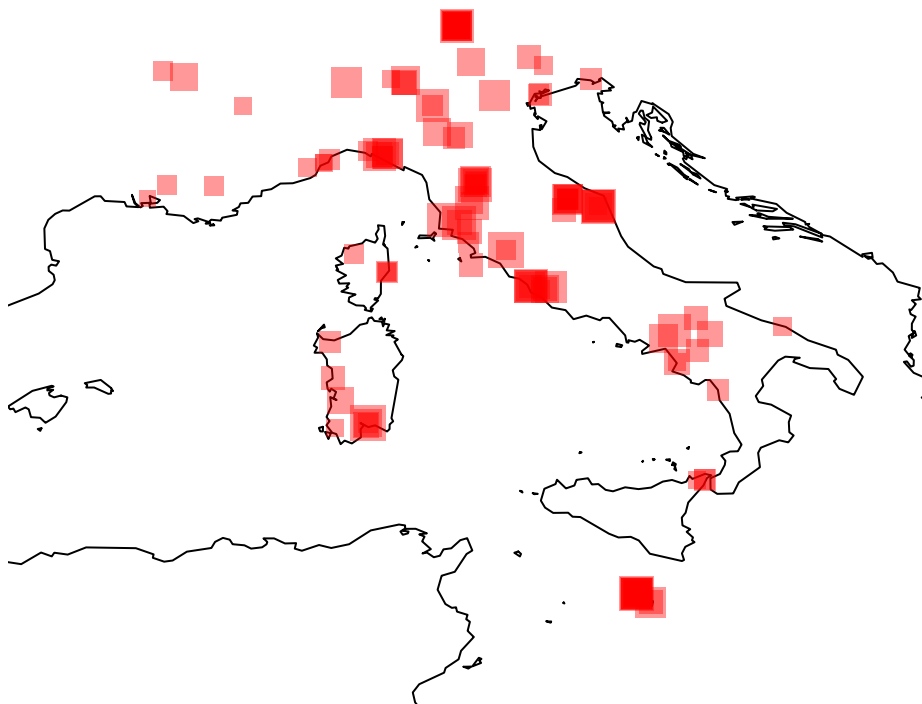

3335 cal. BC

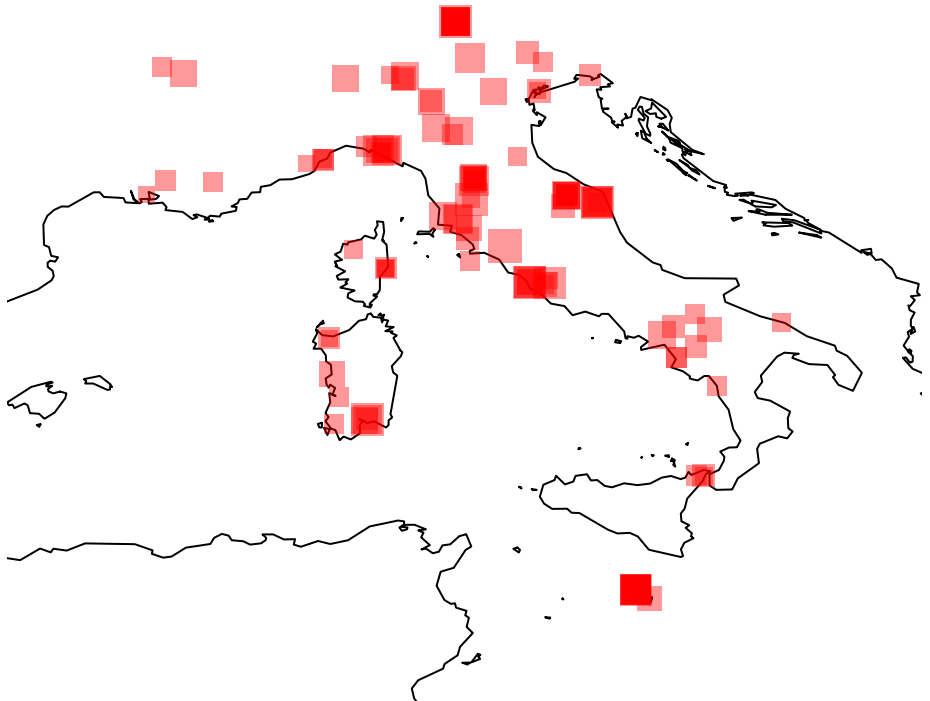

3330 cal. BC

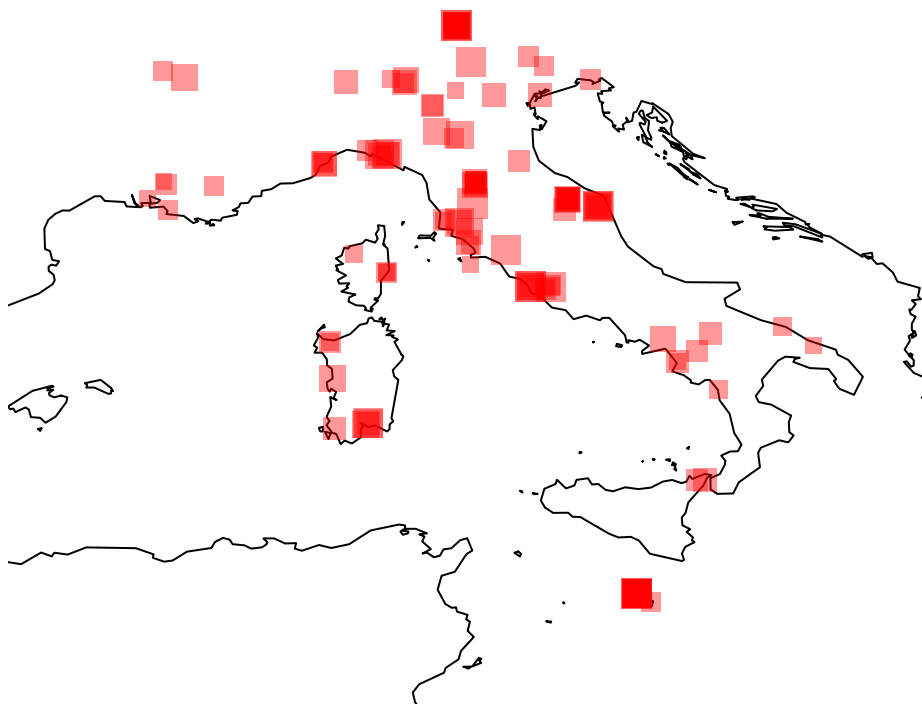



3325 cal. BC

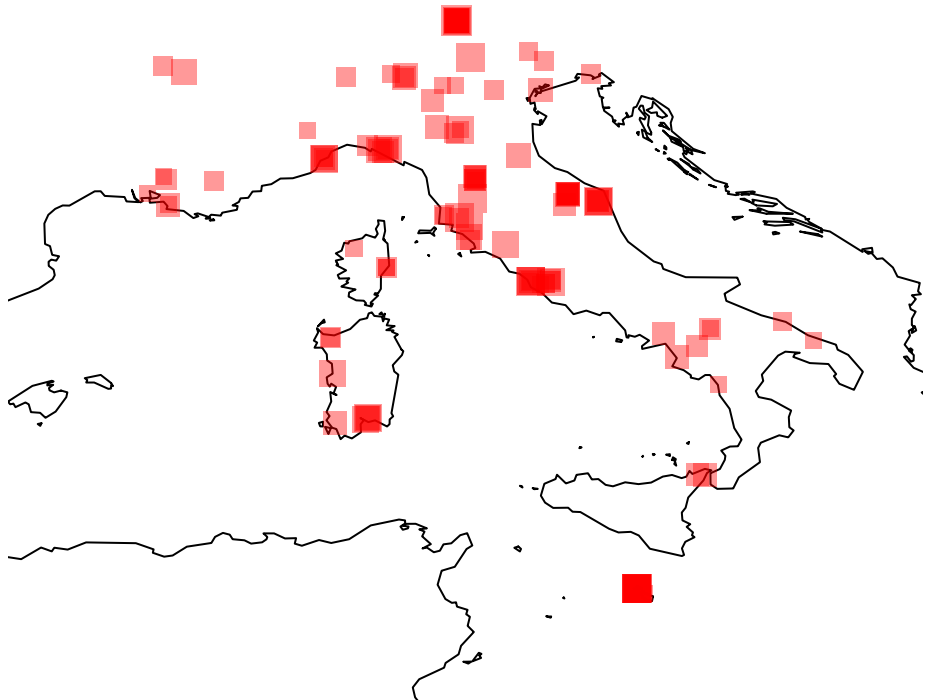

3320 cal. BC

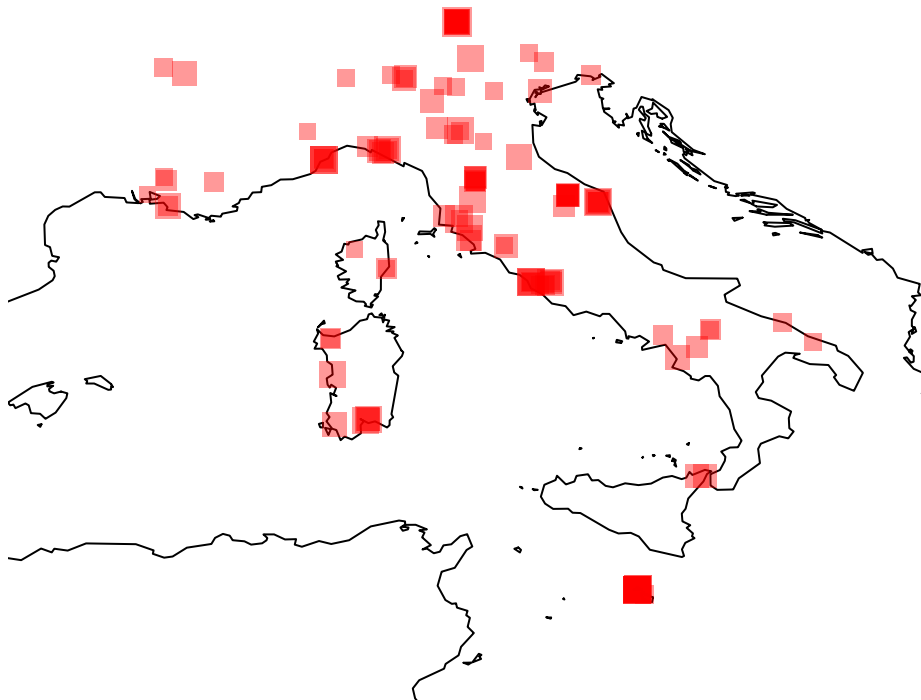



3310 cal. BC

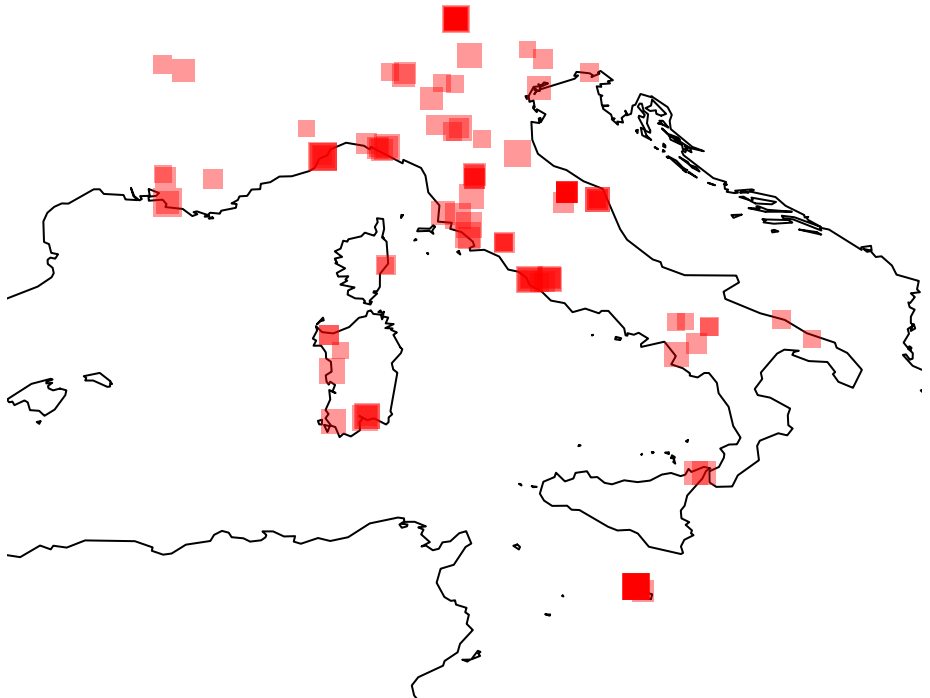

3305 cal. BC

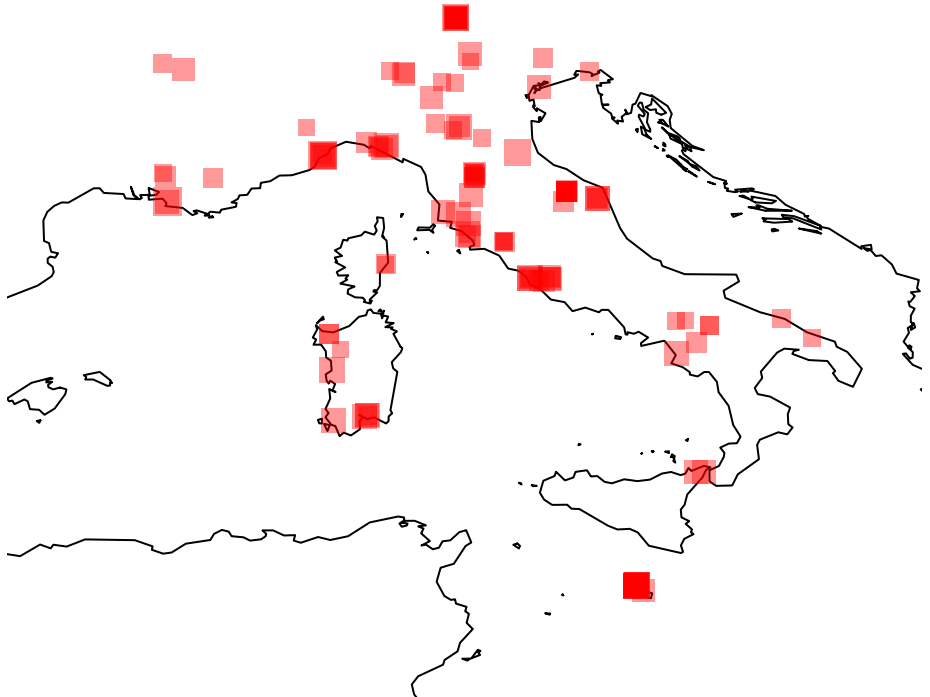

3300 cal. BC

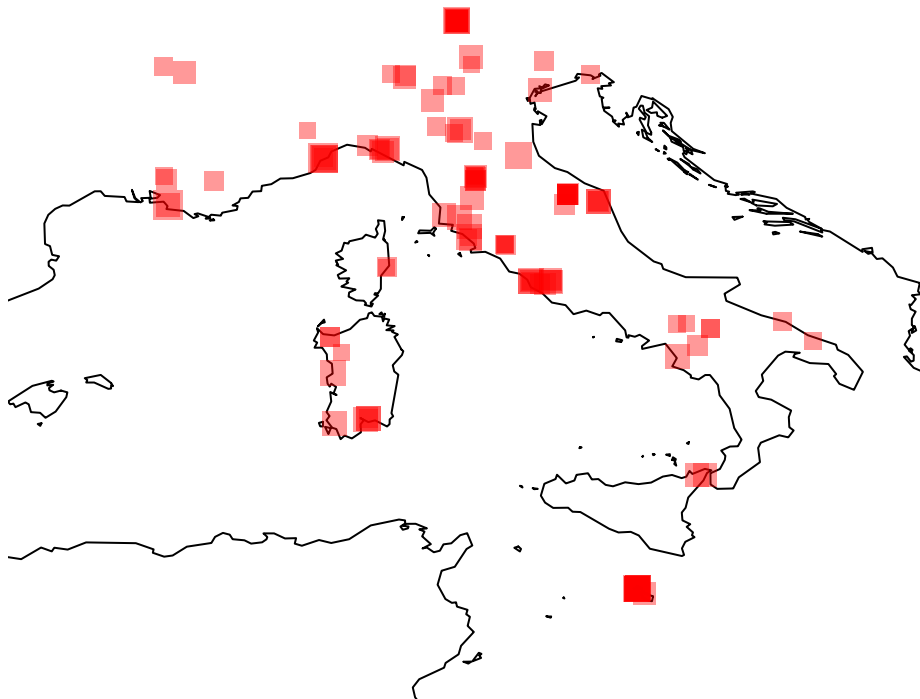

3295 cal. BC

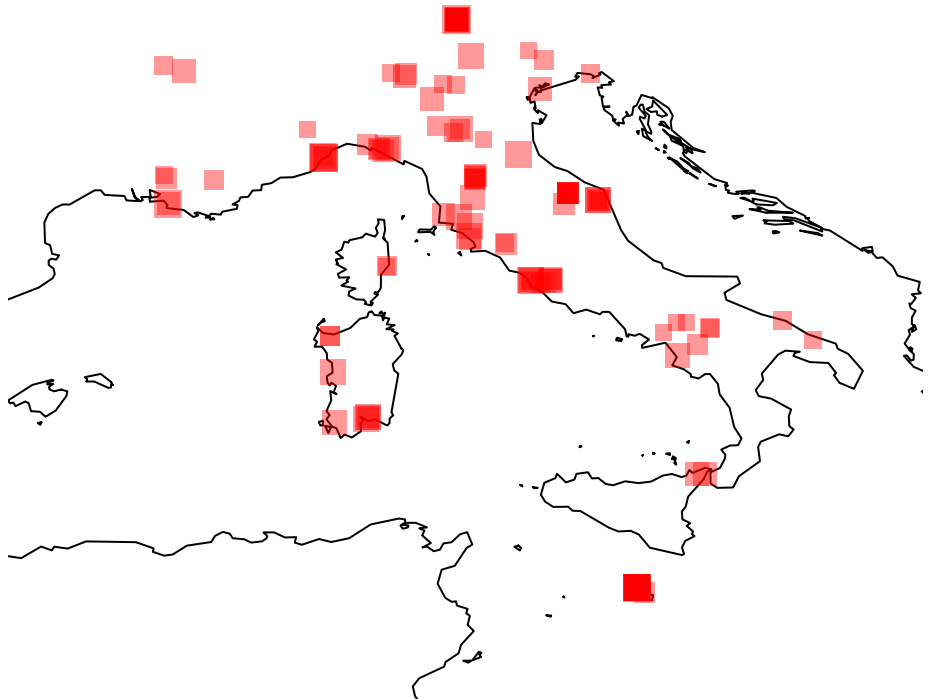

3290 cal. BC

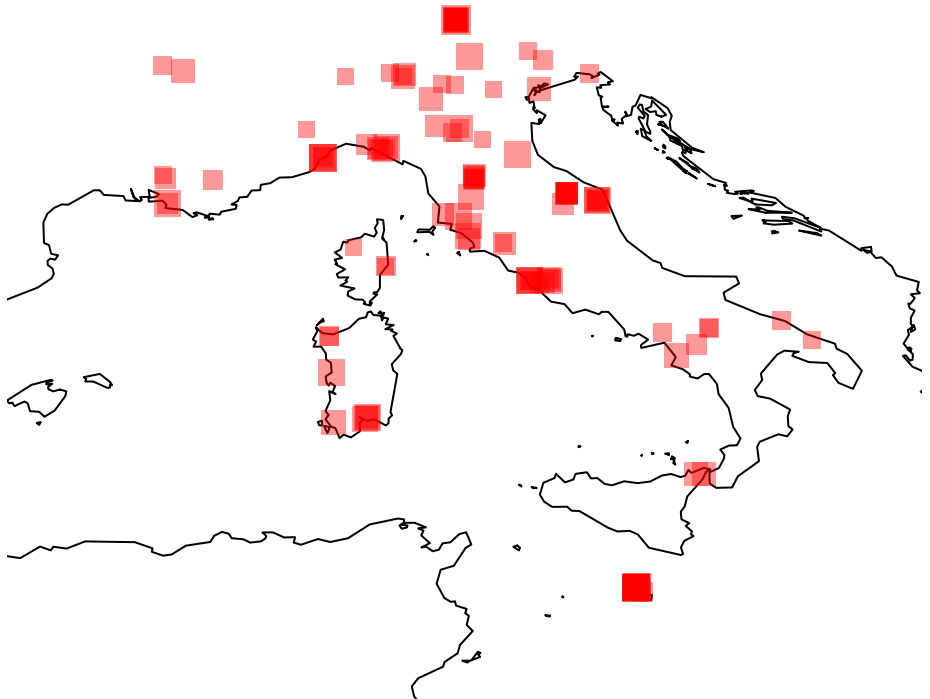



3285 cal. BC

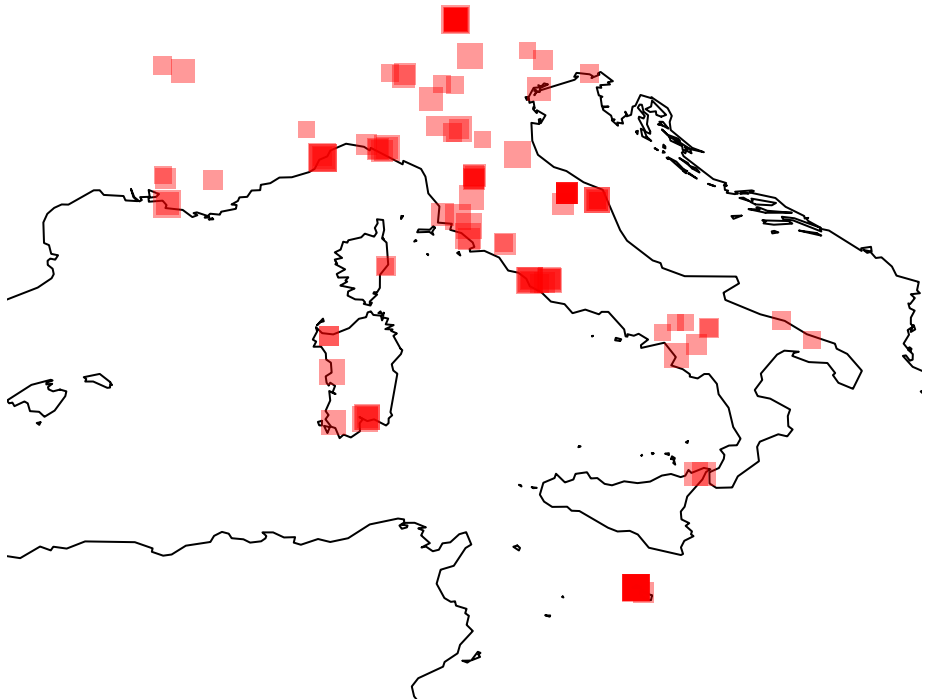

3280 cal. BC

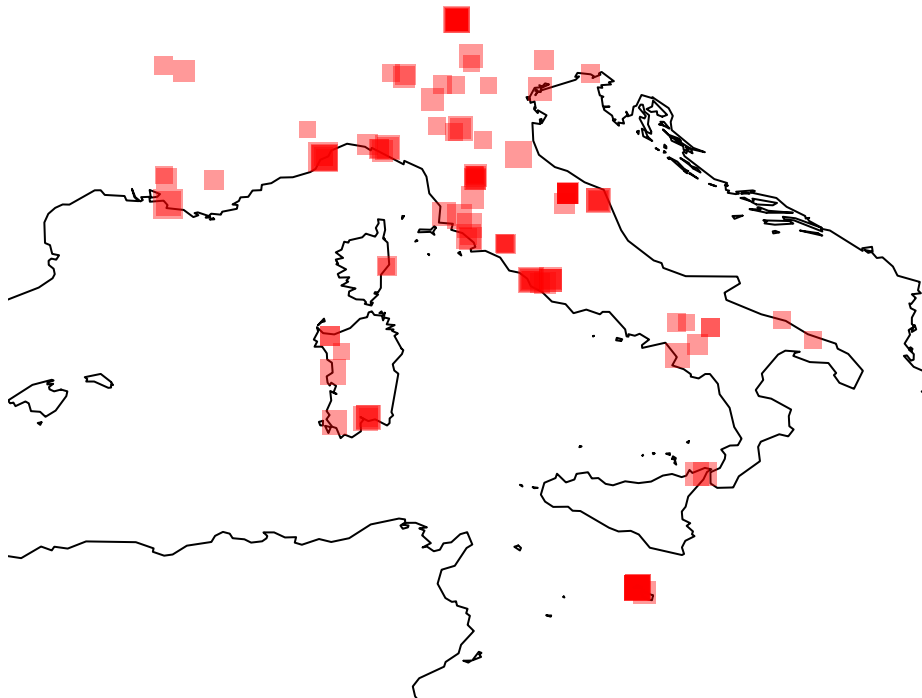

3275 cal. BC

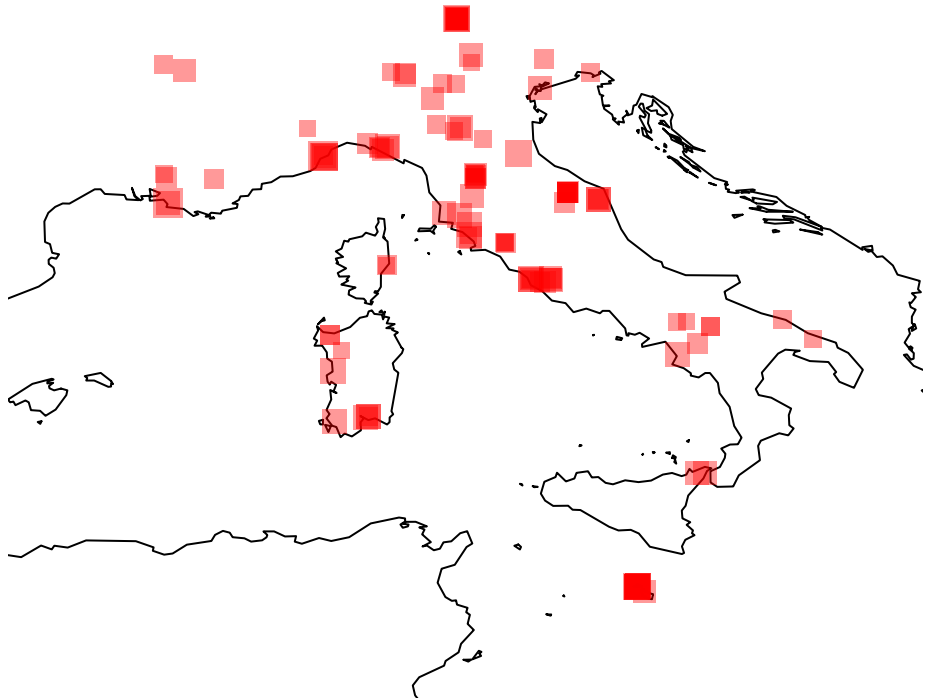

3270 cal. BC

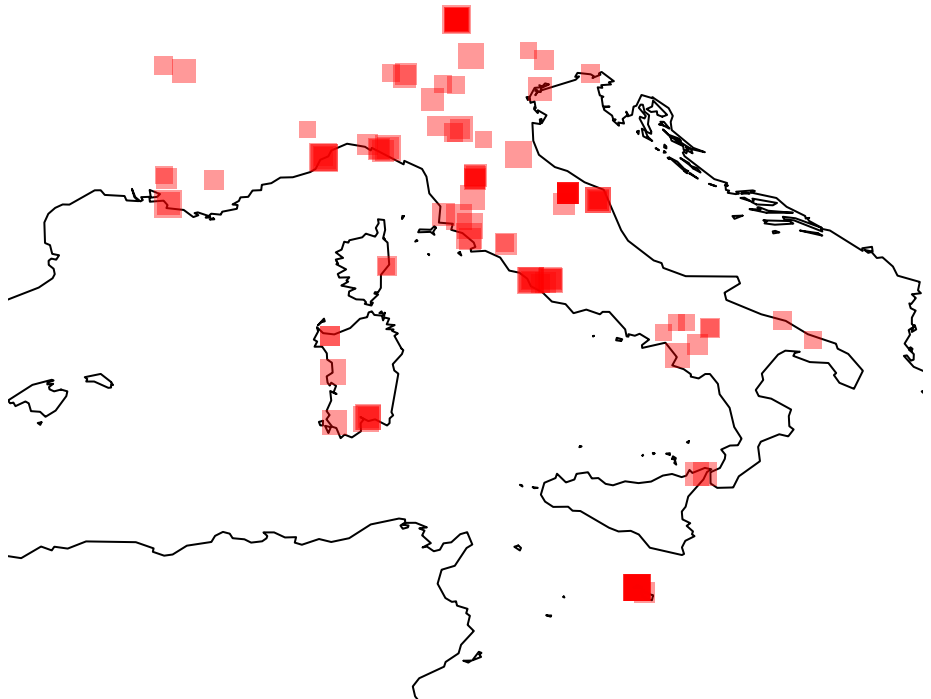

3265 cal. BC

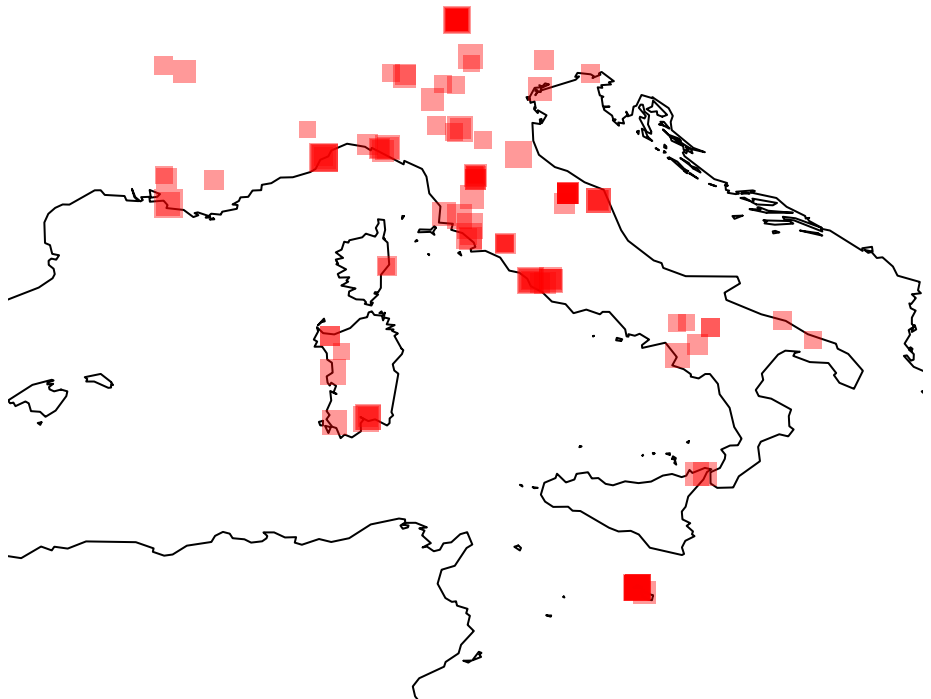



3255 cal. BC

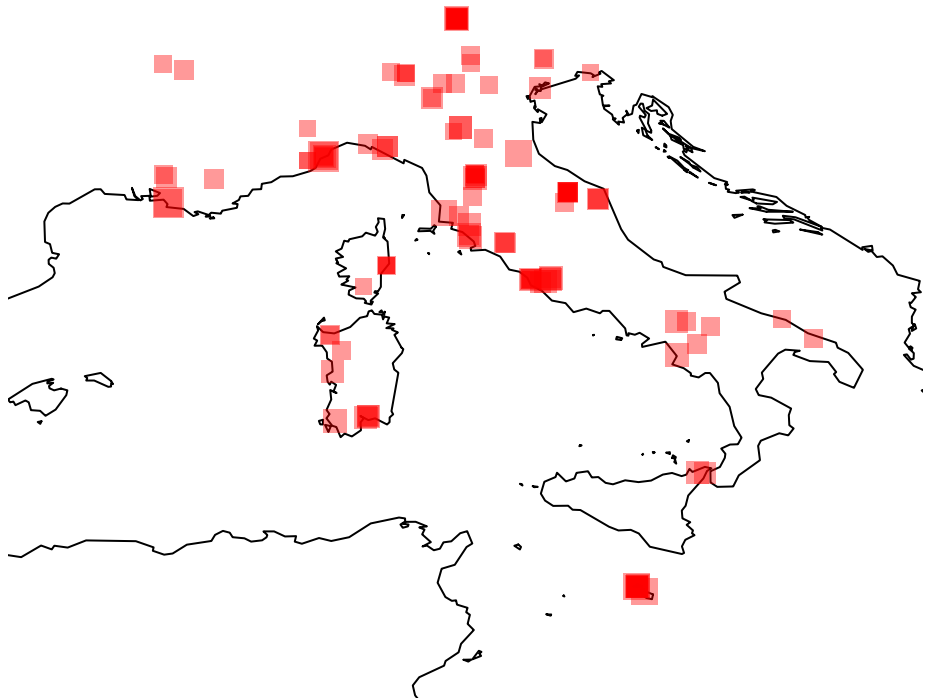

3250 cal. BC

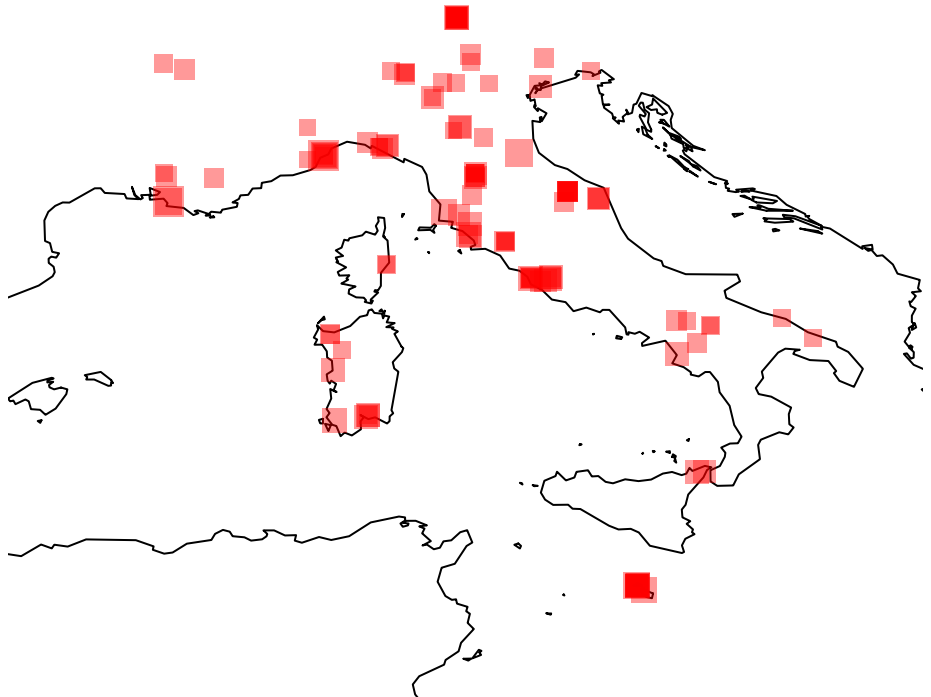



3245 cal. BC

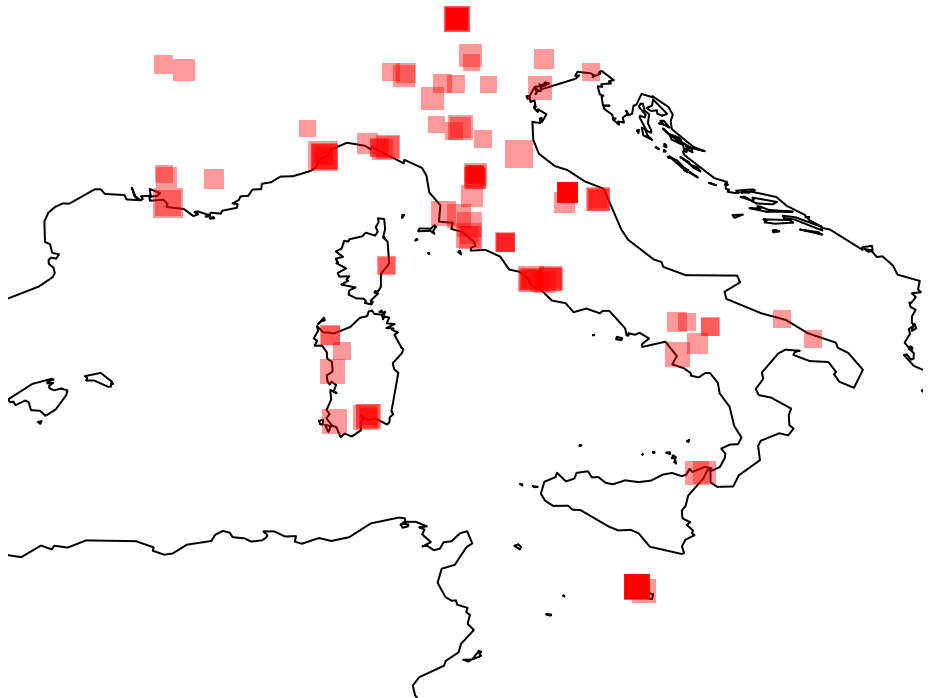

3240 cal. BC

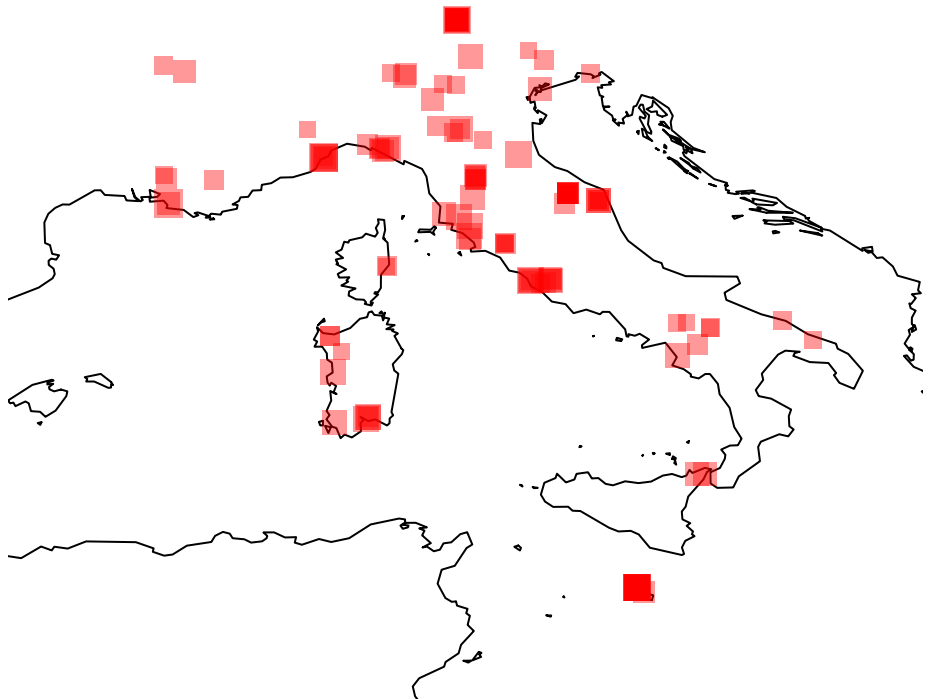



3230 cal. BC

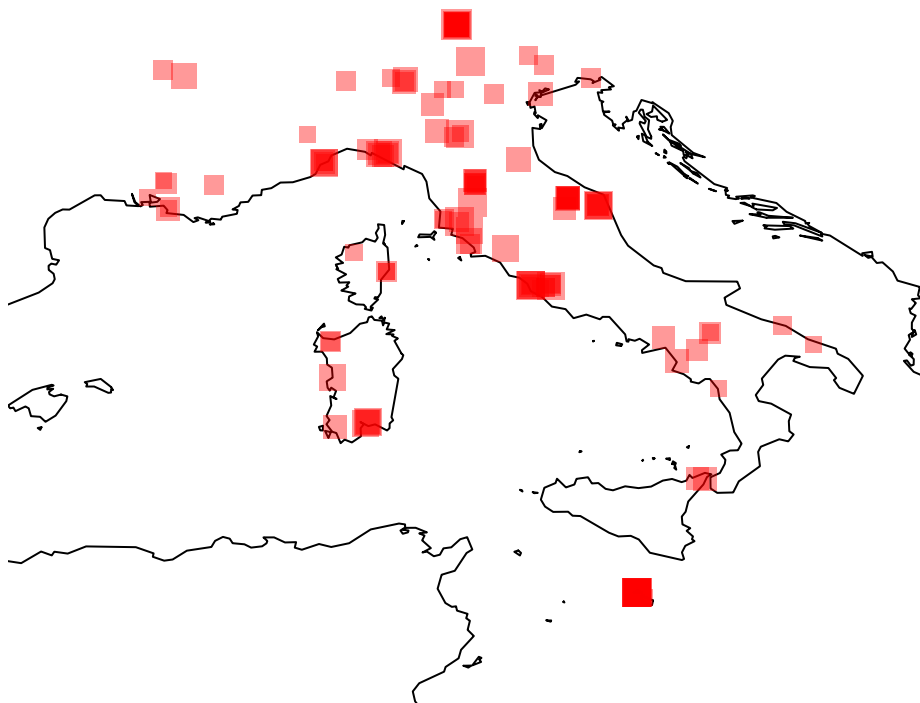

3225 cal. BC

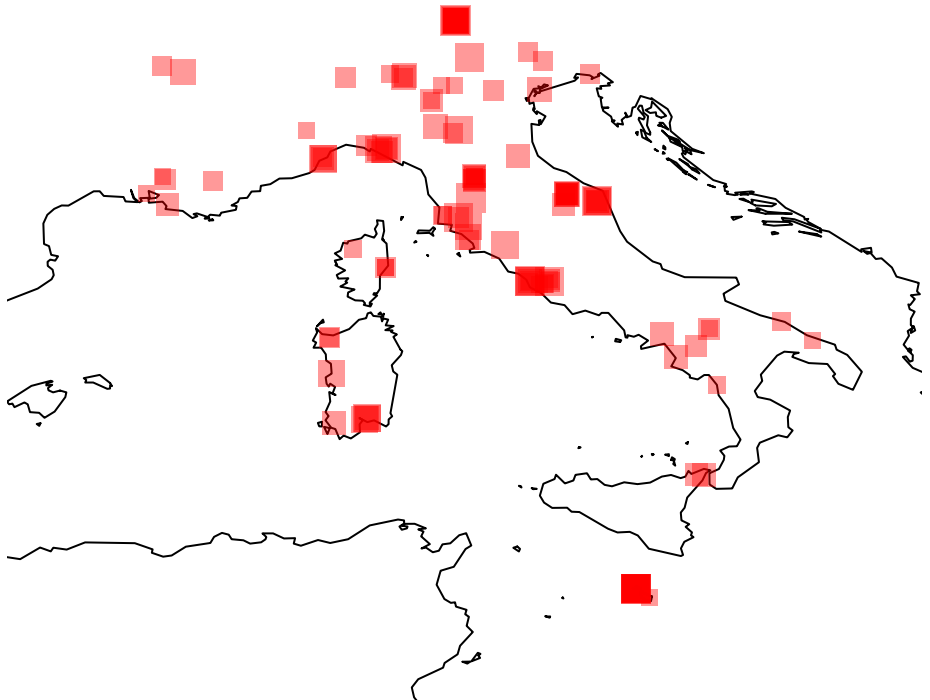

3220 cal. BC

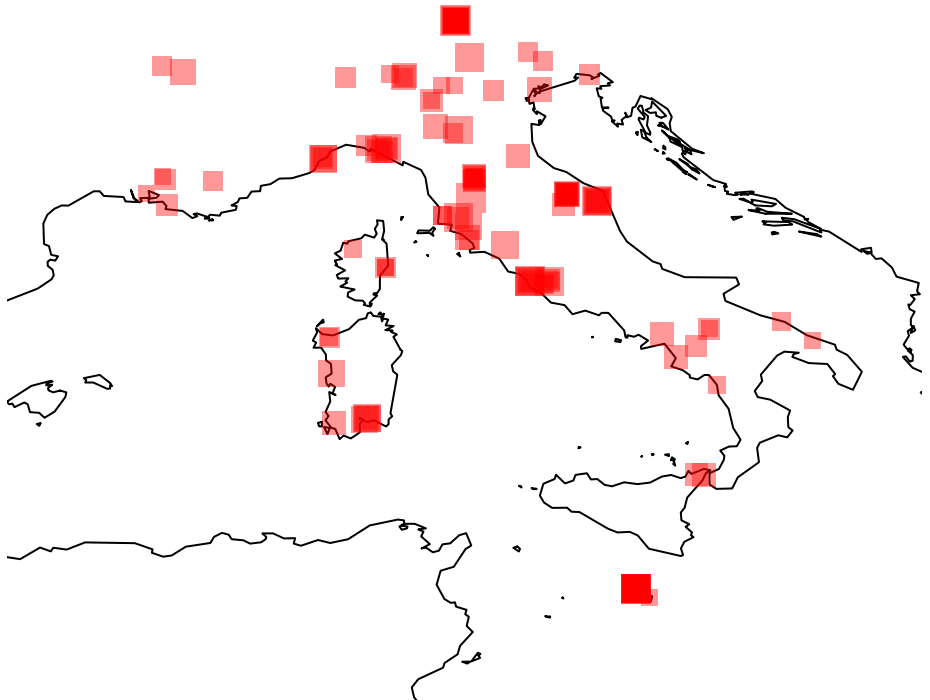



3210 cal. BC

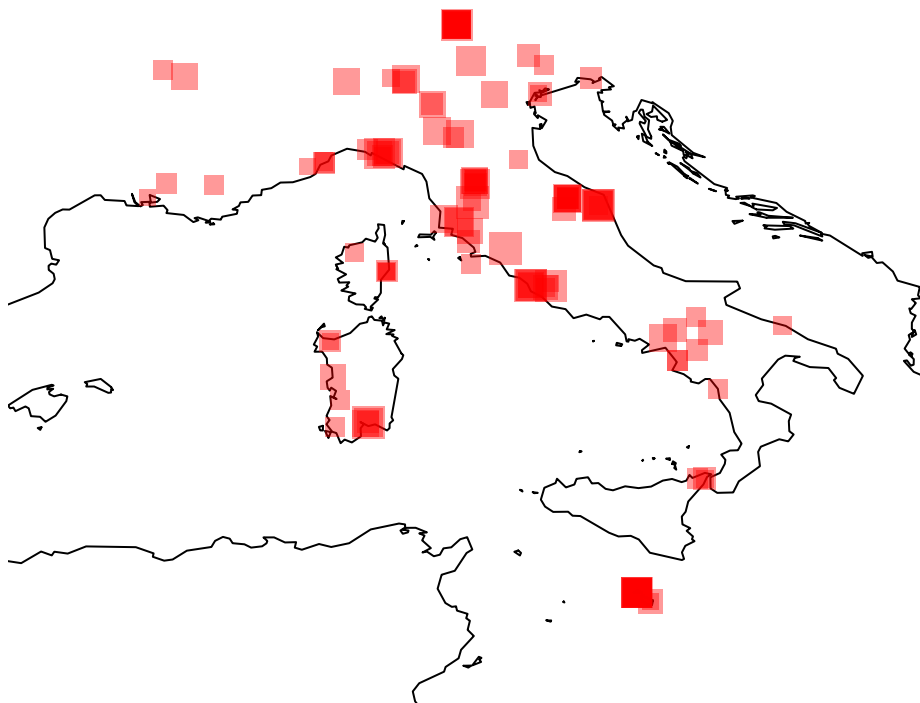



3205 cal. BC

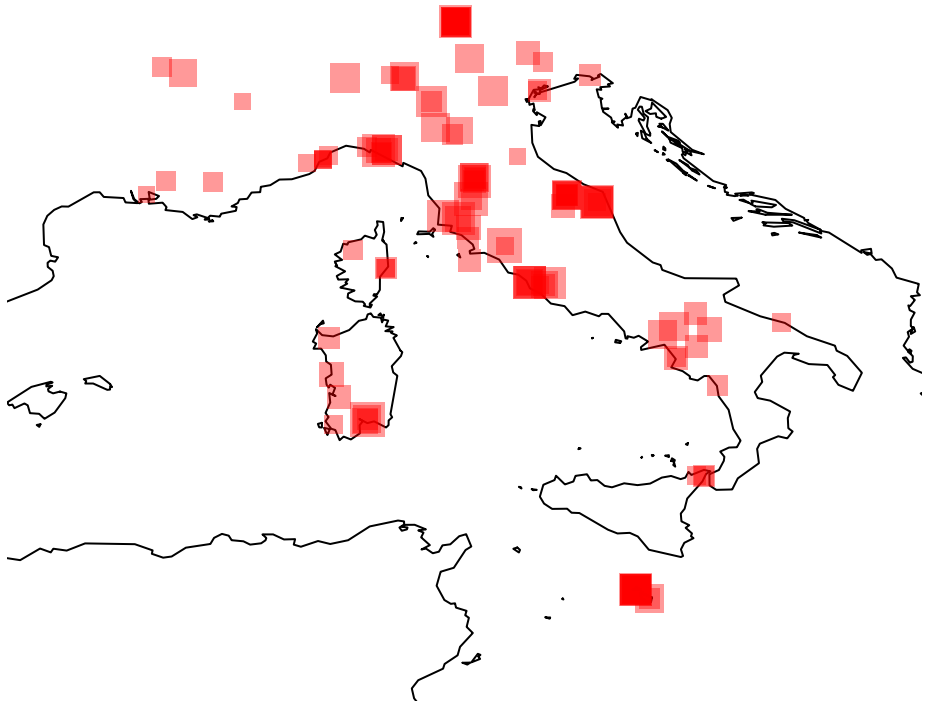

3200 cal. BC

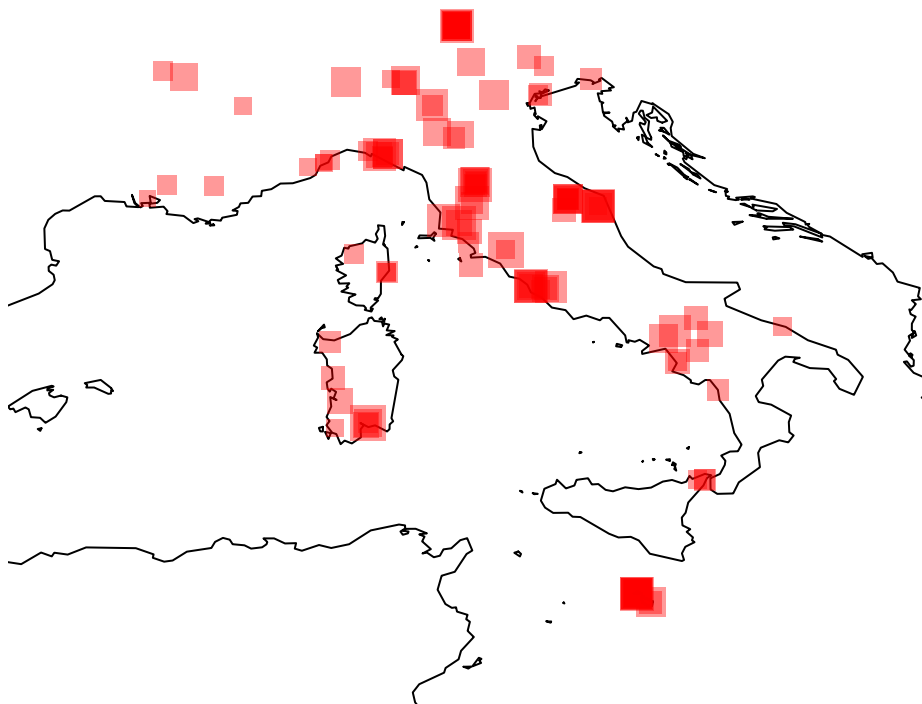

3195 cal. BC

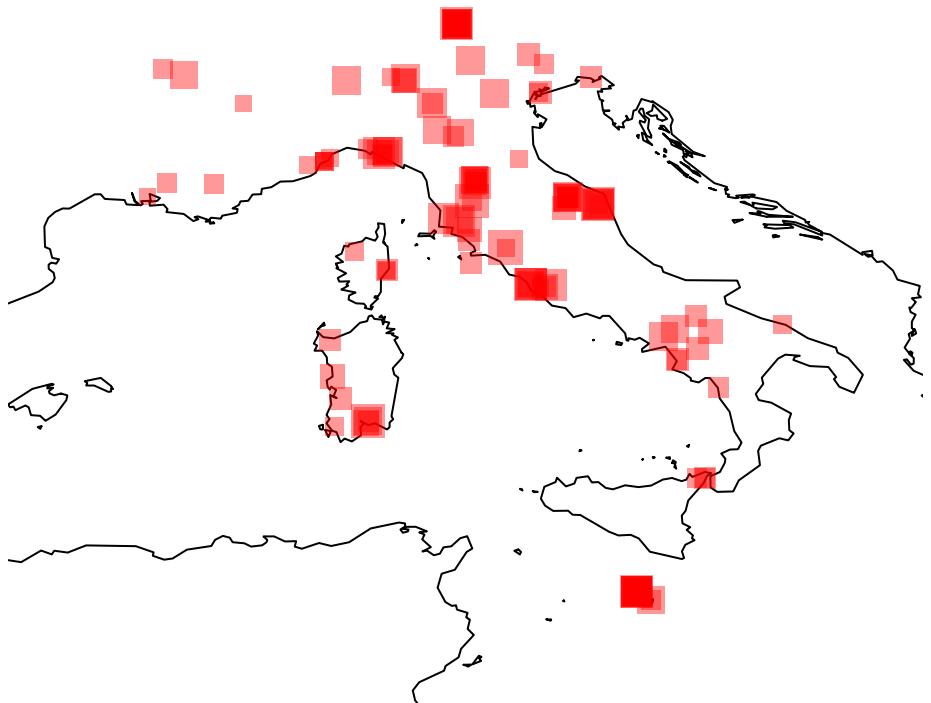

3190 cal. BC

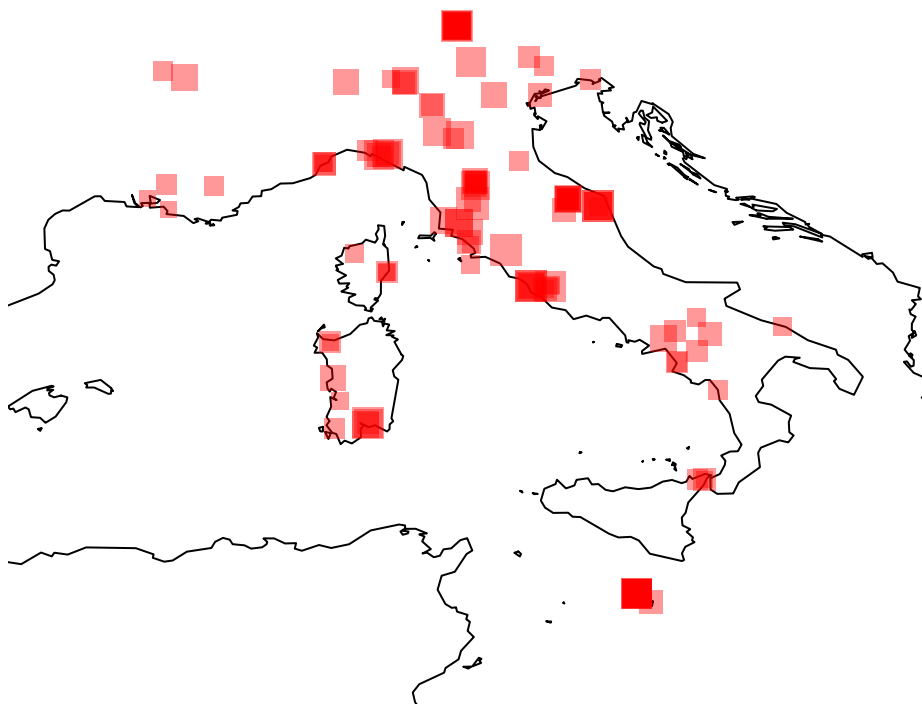

3185 cal. BC

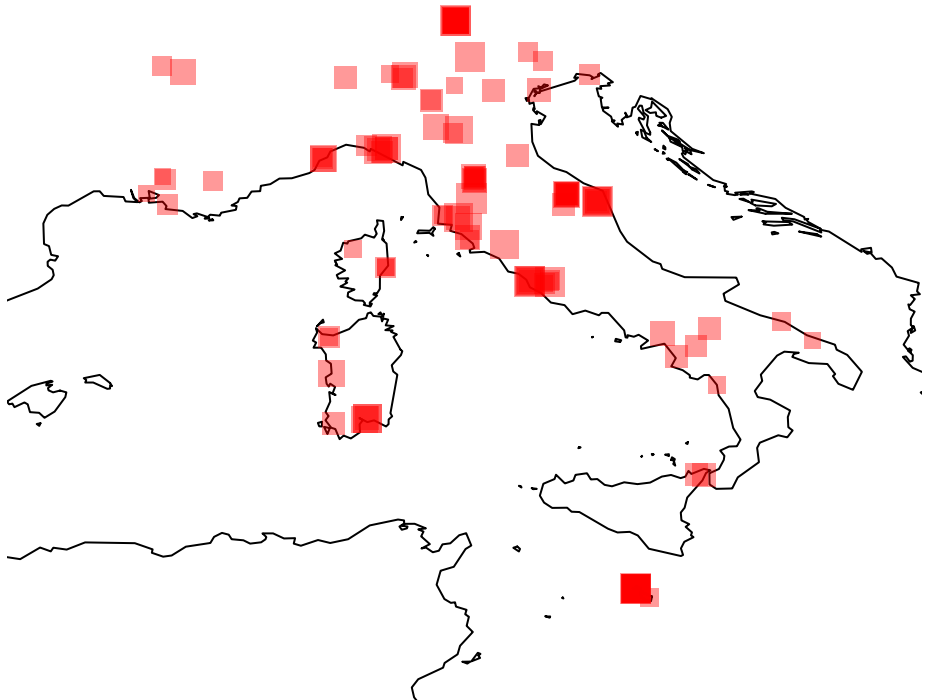

3180 cal. BC

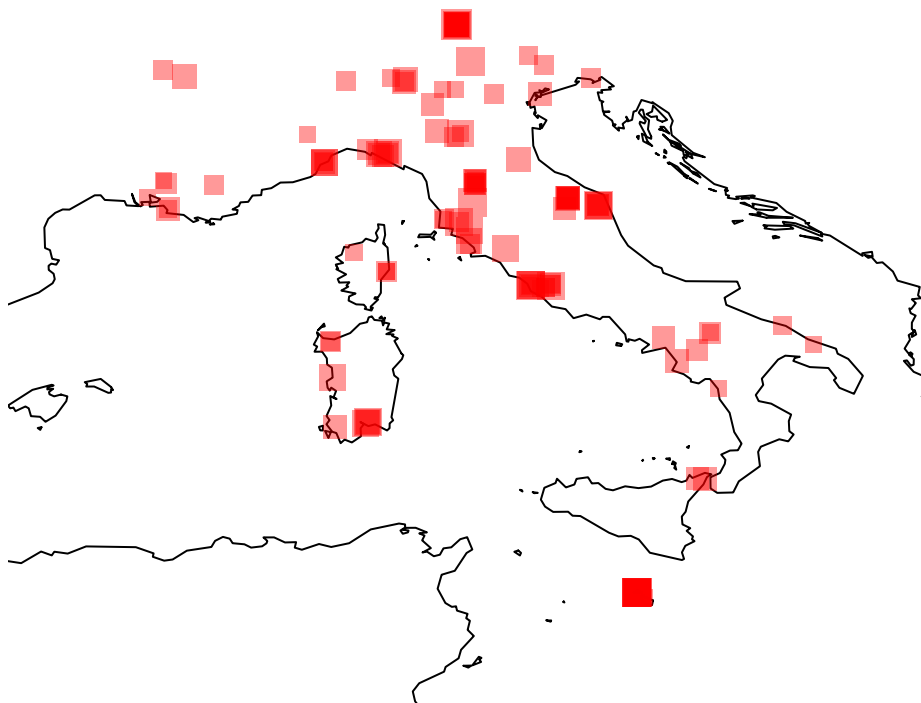

3175 cal. BC



3170 cal. BC

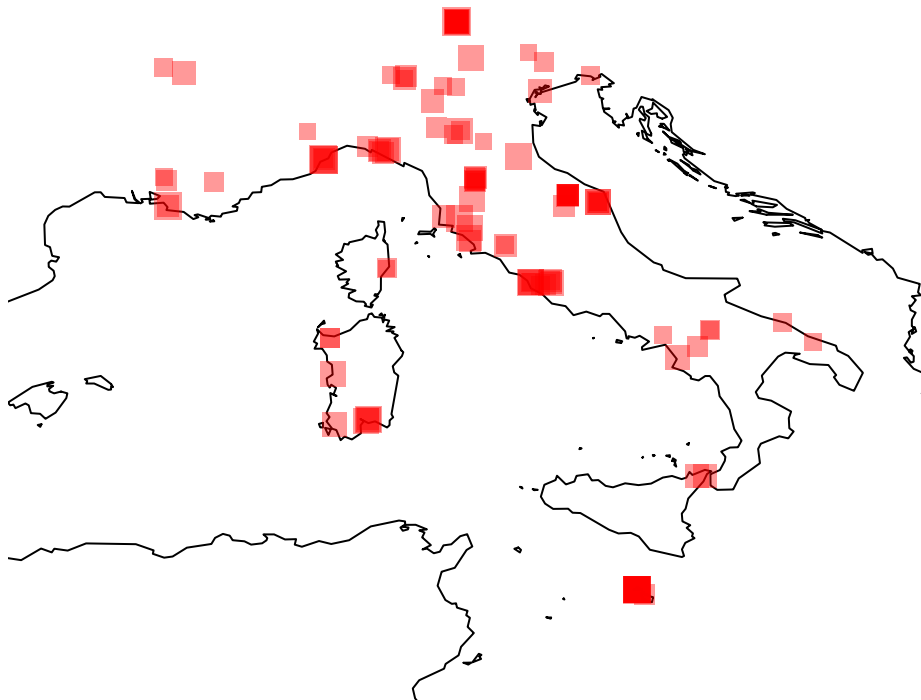







3155 cal. BC

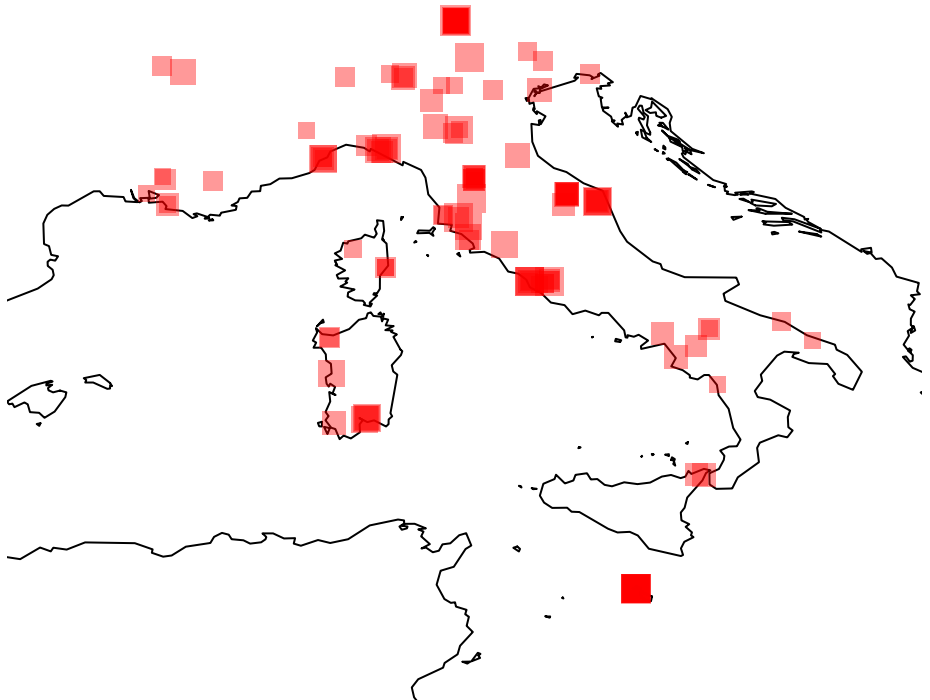

3150 cal. BC

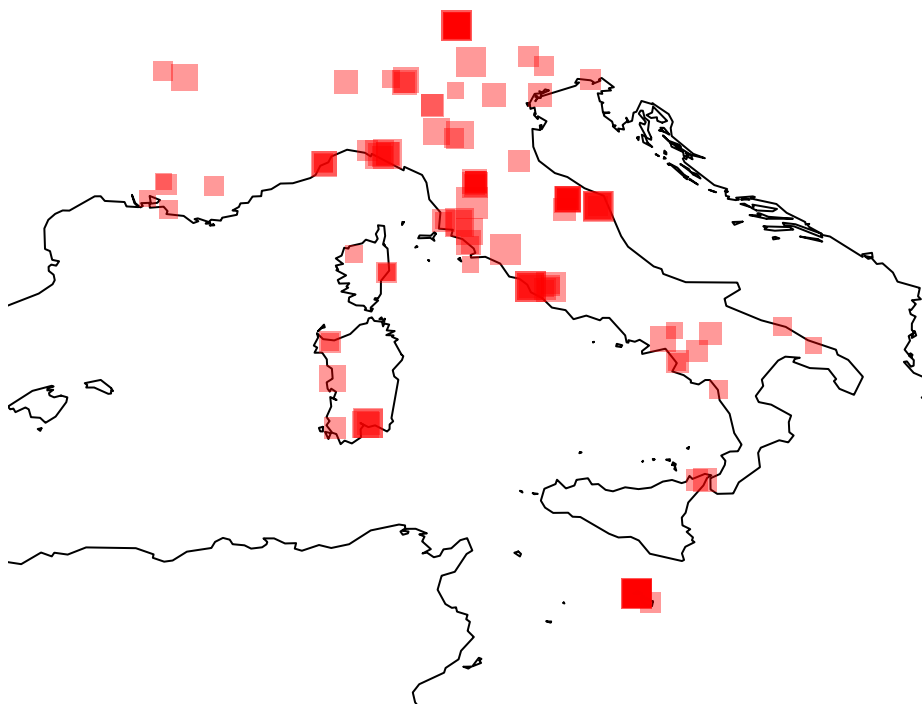

3145 cal. BC

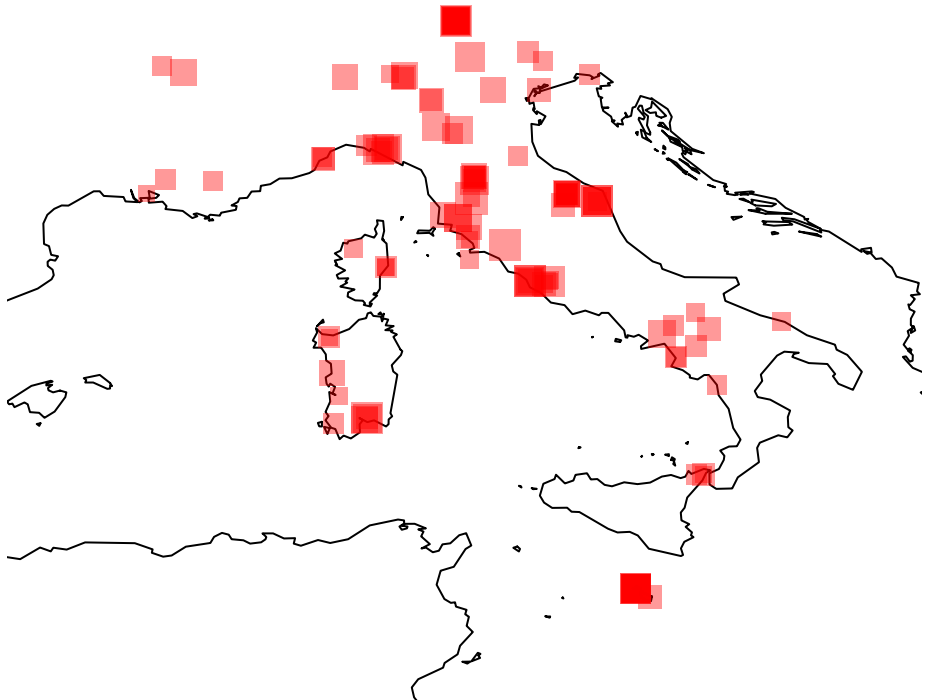

3140 cal. BC

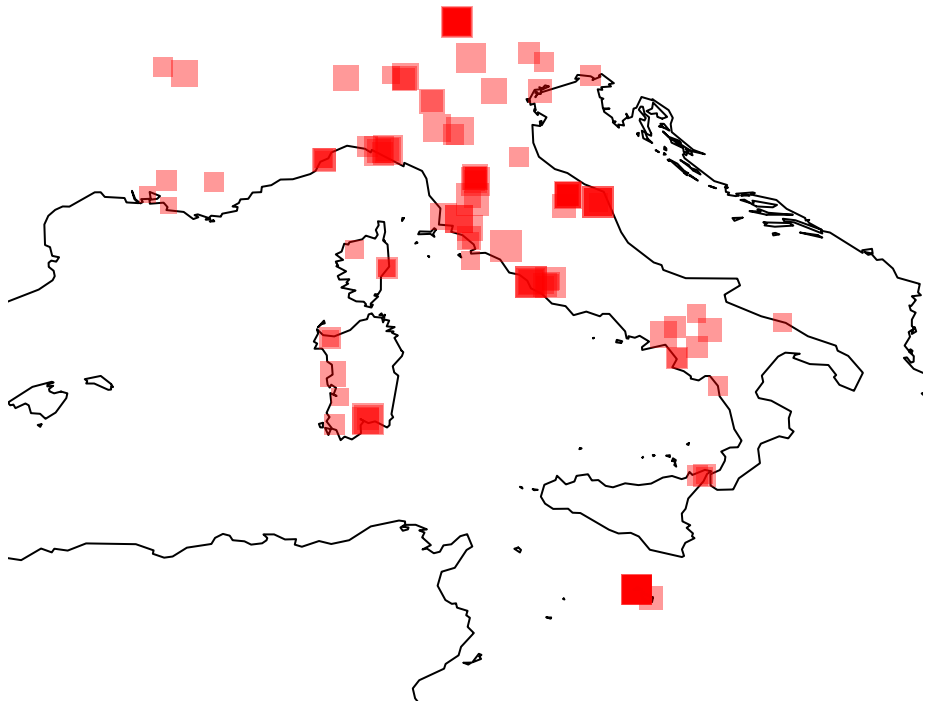

3135 cal. BC

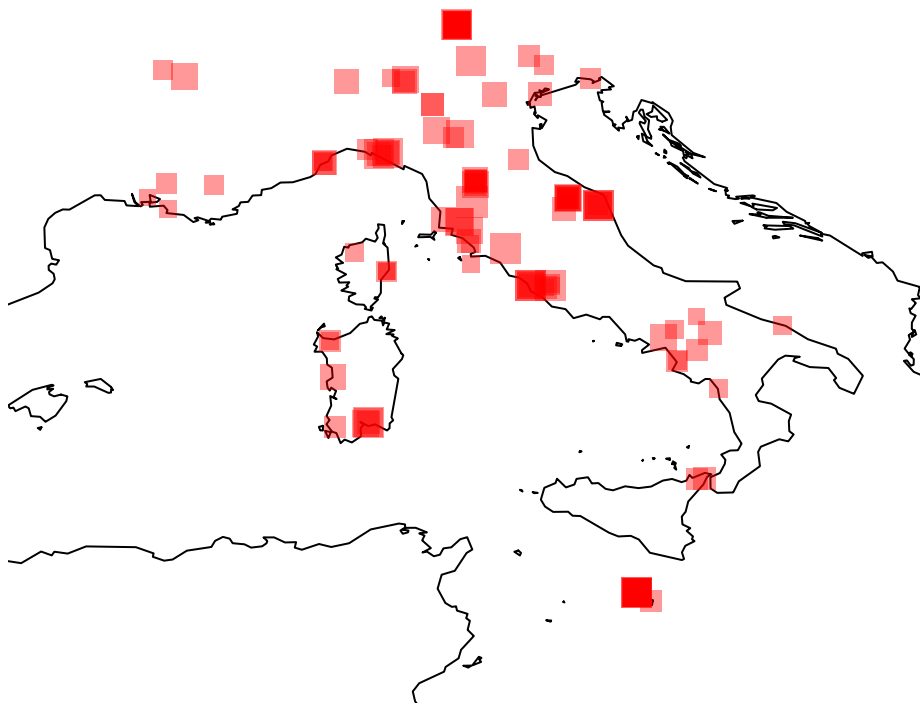

3130 cal. BC

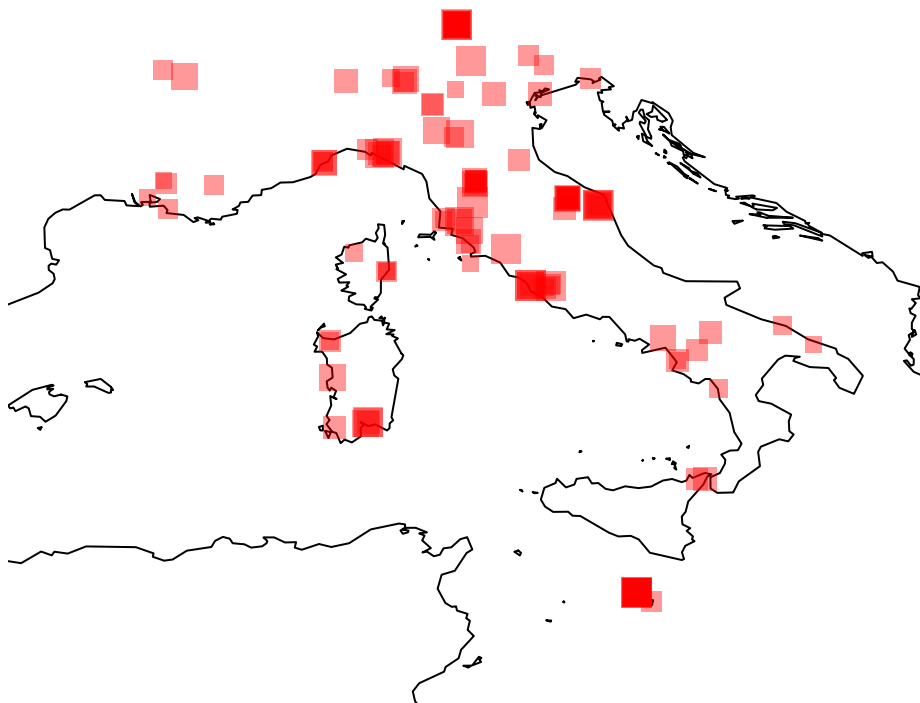



3125 cal. BC

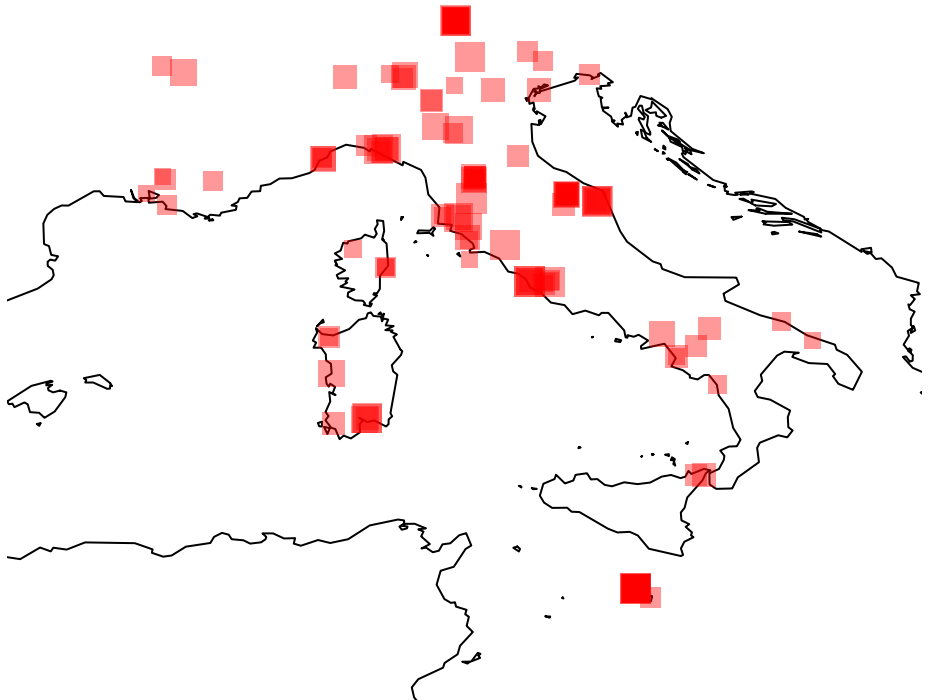

3120 cal. BC

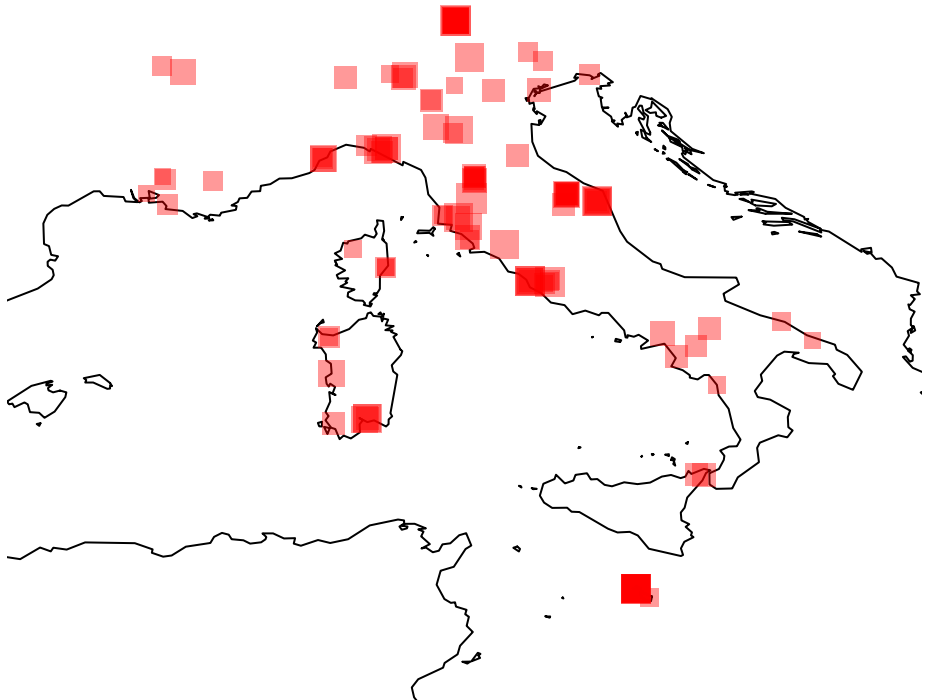

3115 cal. BC

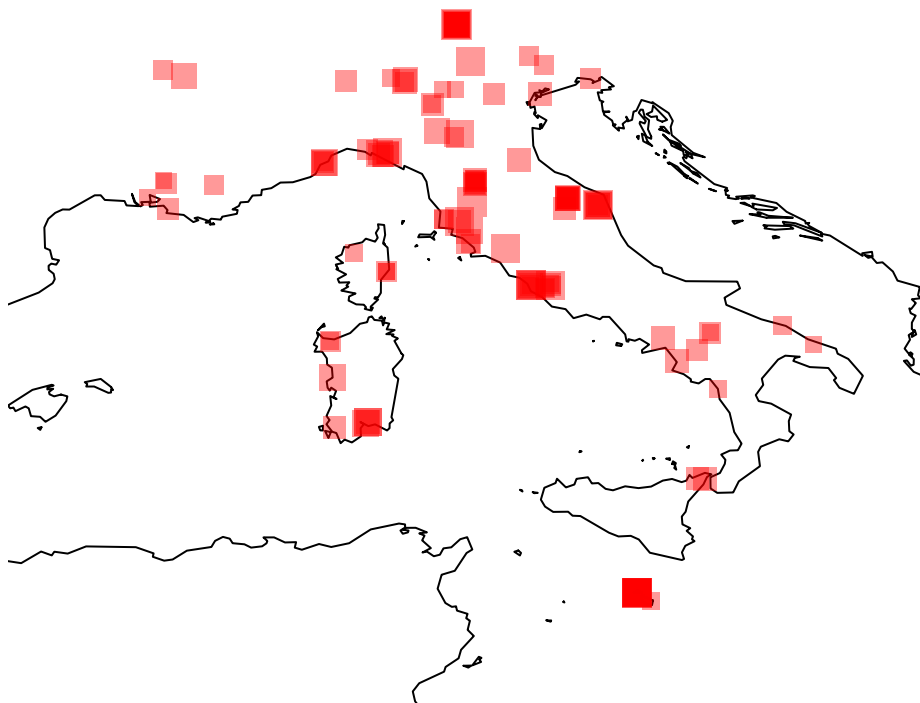

3110 cal. BC

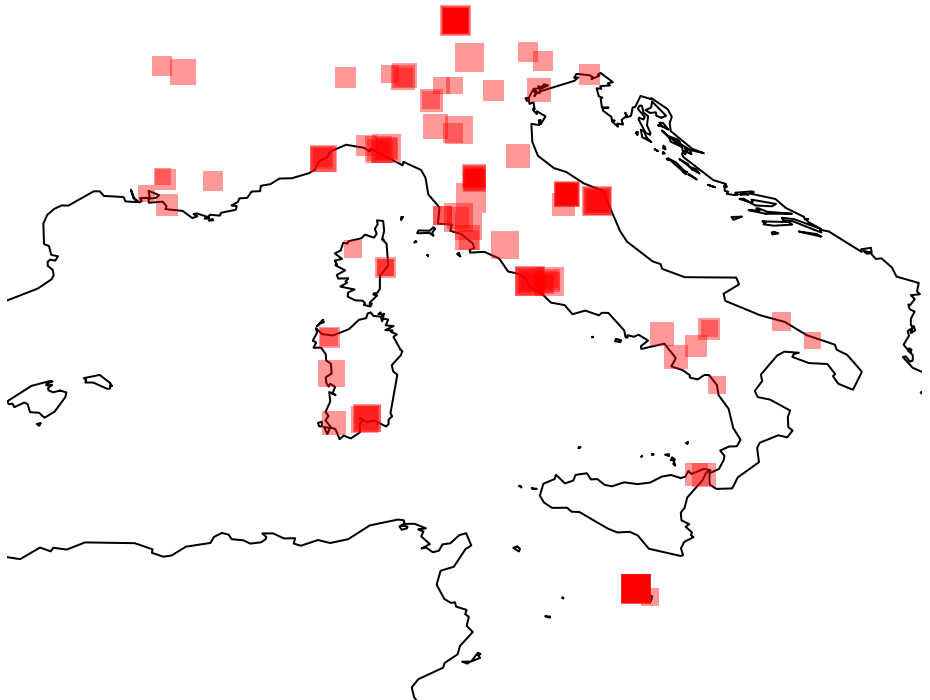



3100 cal. BC

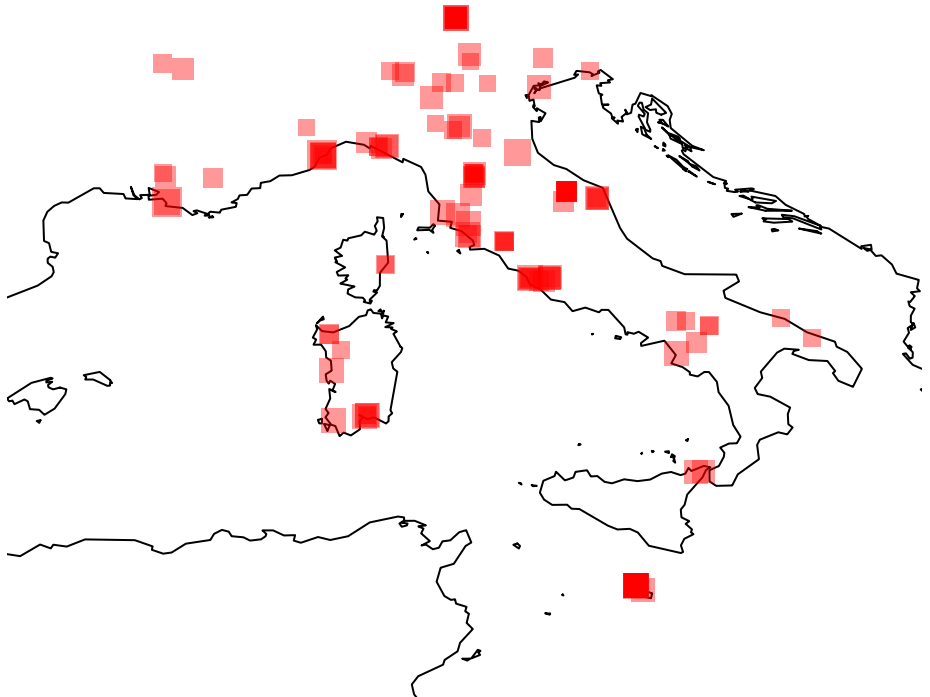

3095 cal. BC

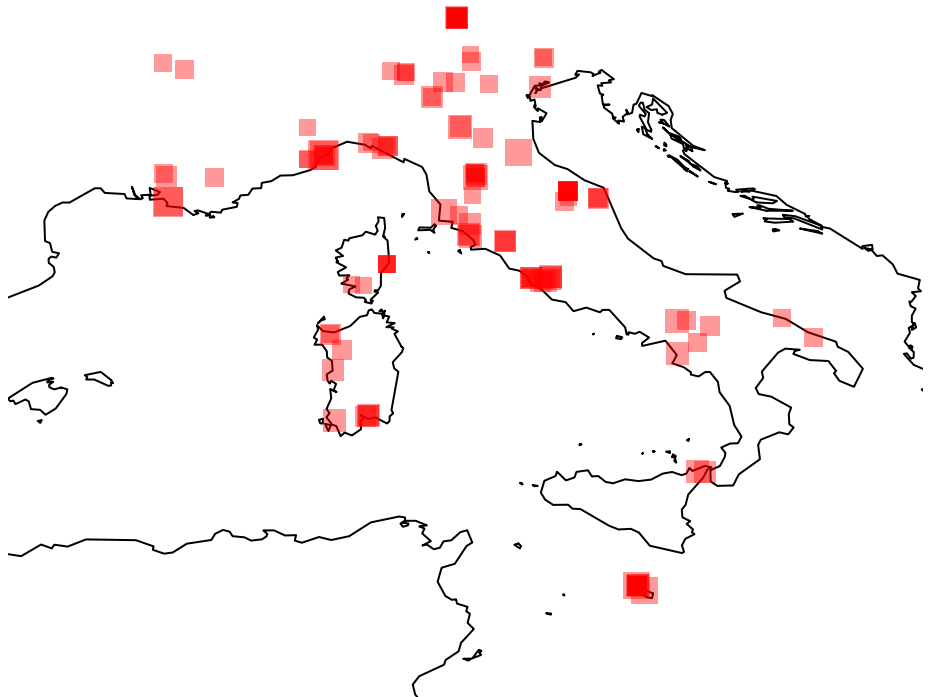

3090 cal. BC

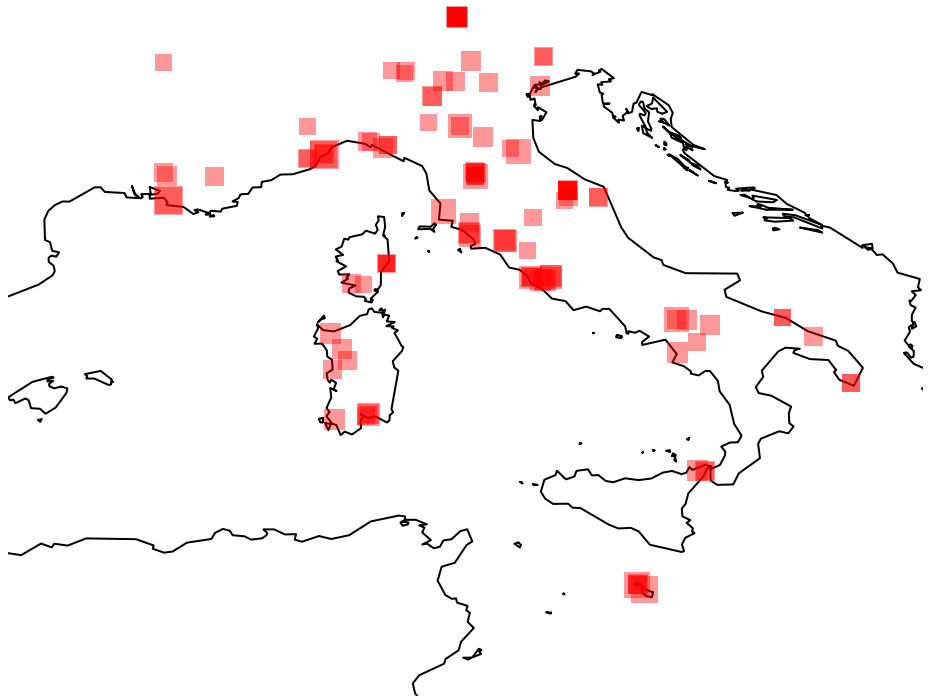



3085 cal. BC

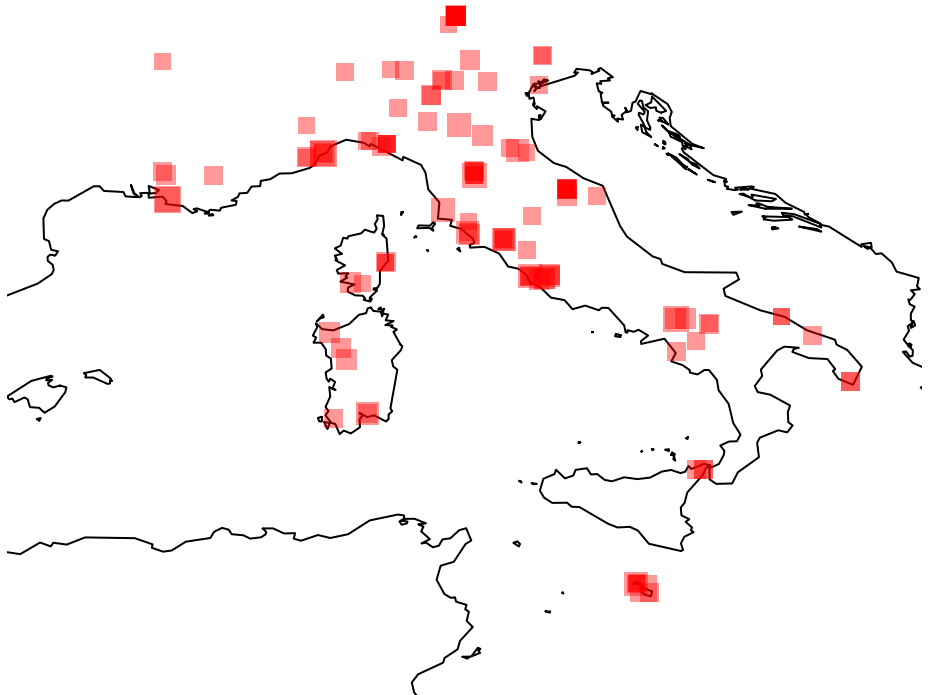

3080 cal. BC

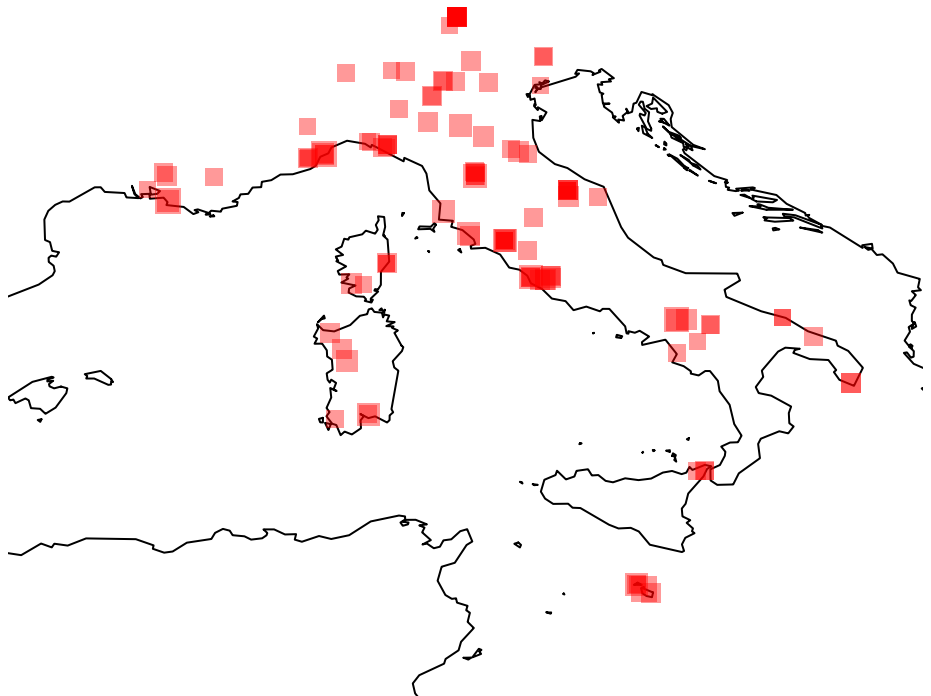

3075 cal. BC

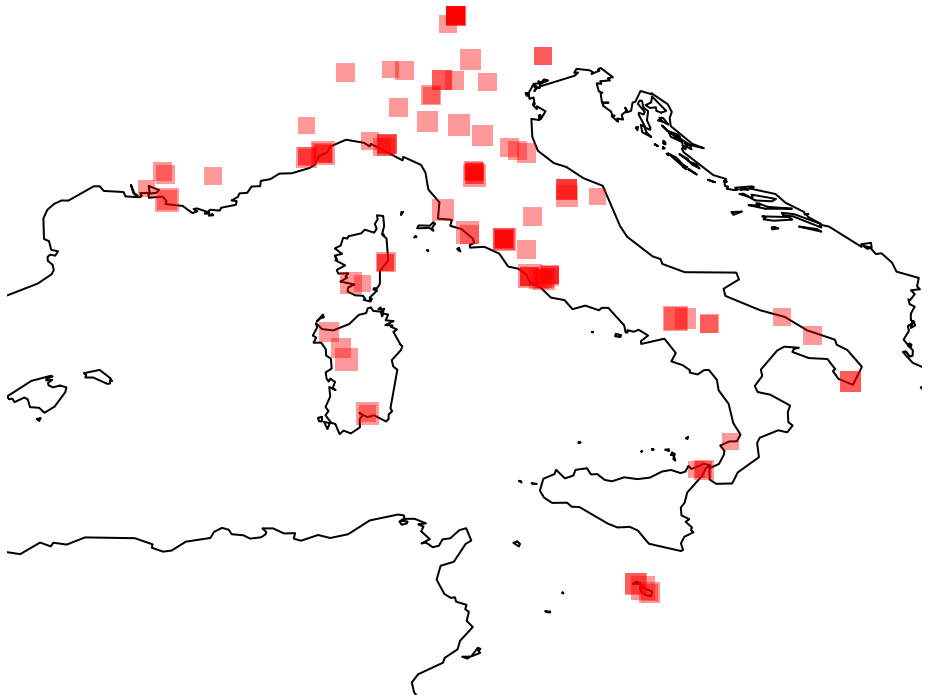

3070 cal. BC

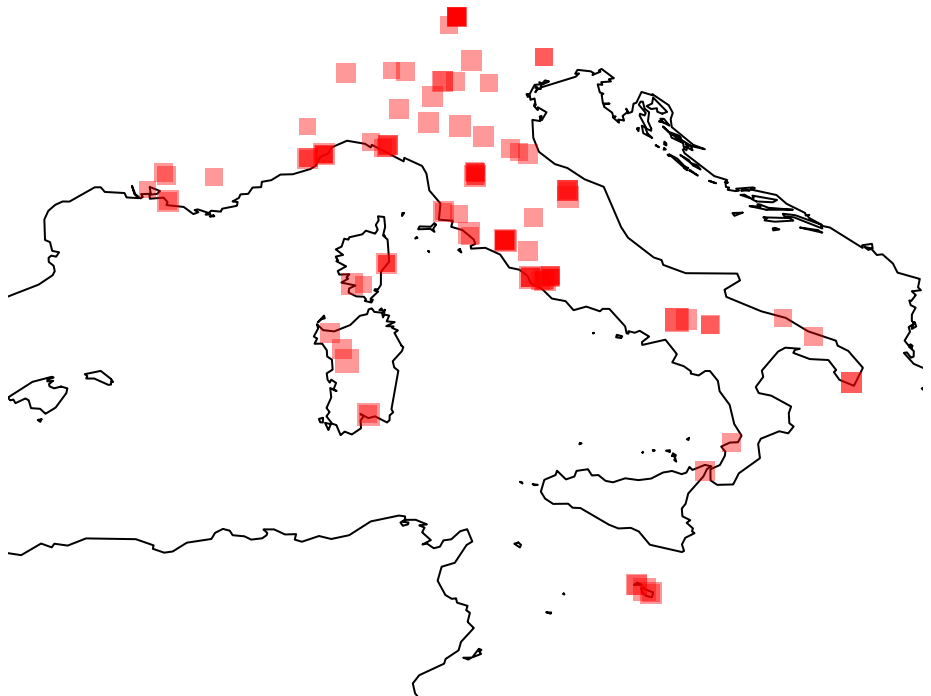

3065 cal. BC

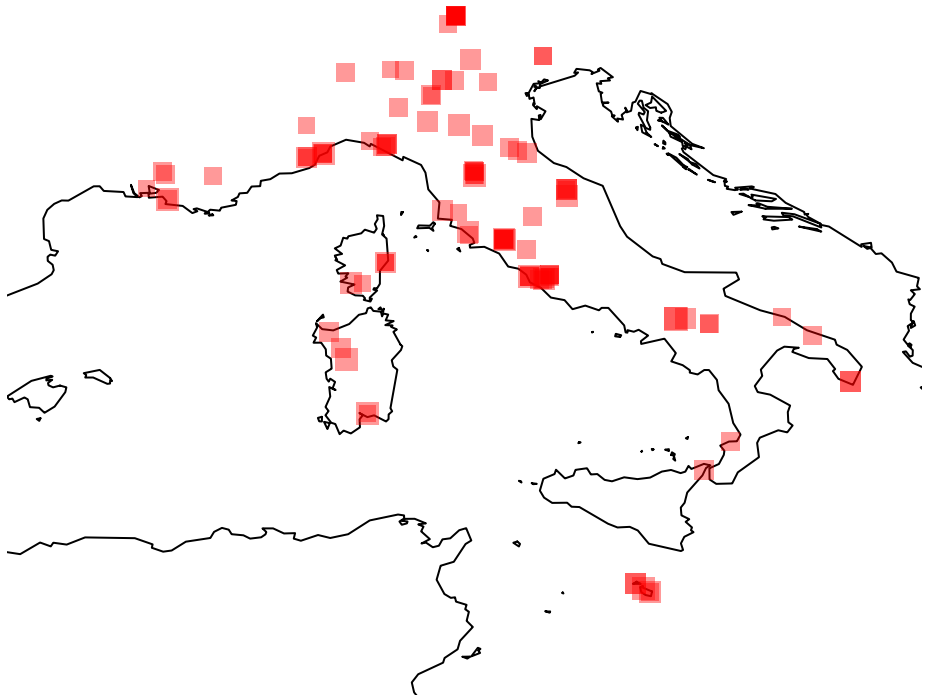

3060 cal. BC

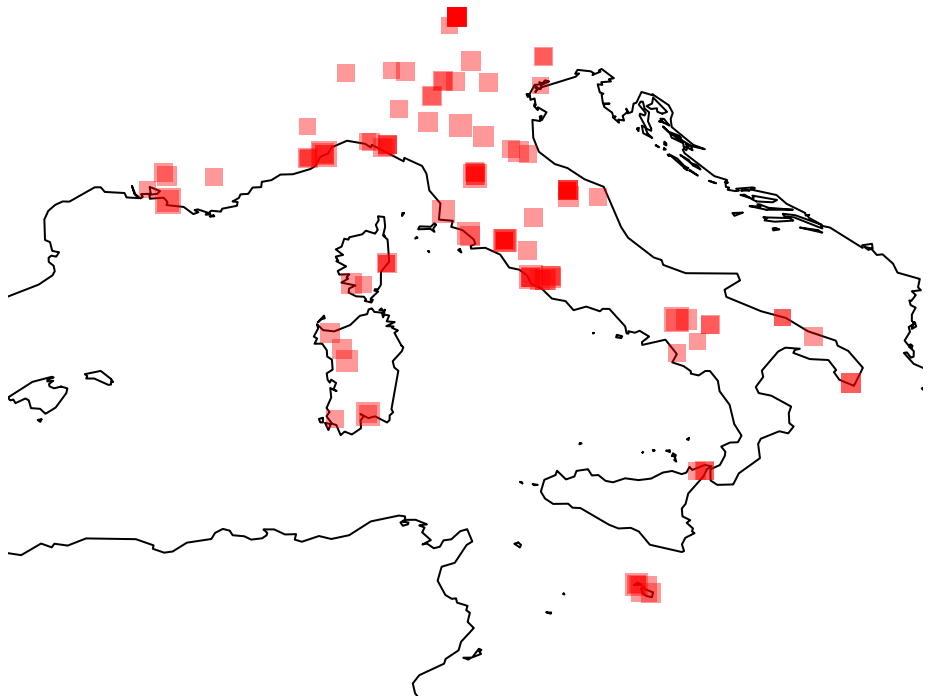

3055 cal. BC

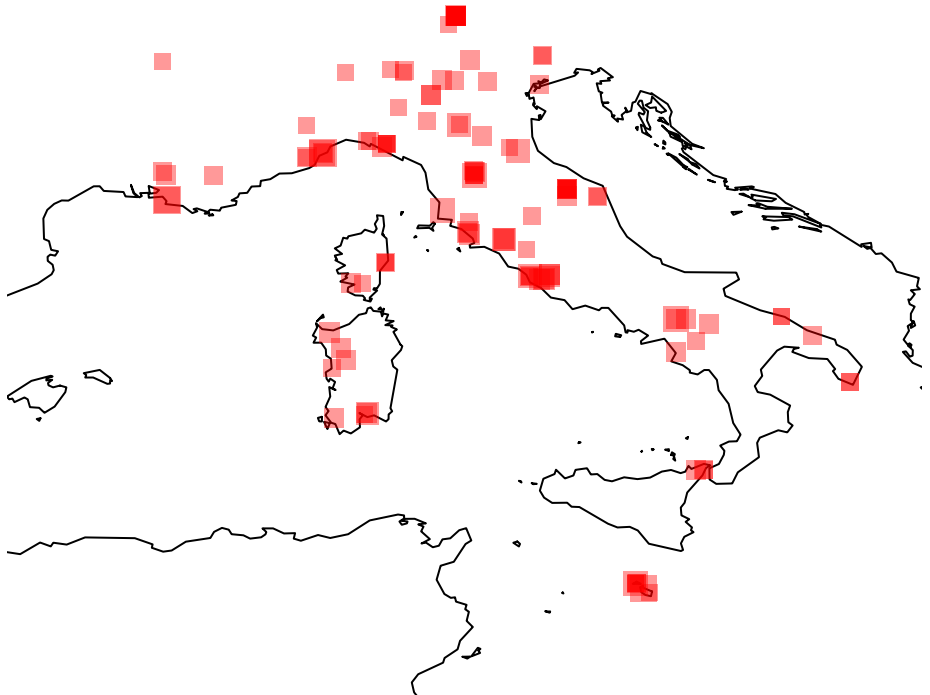

3050 cal. BC

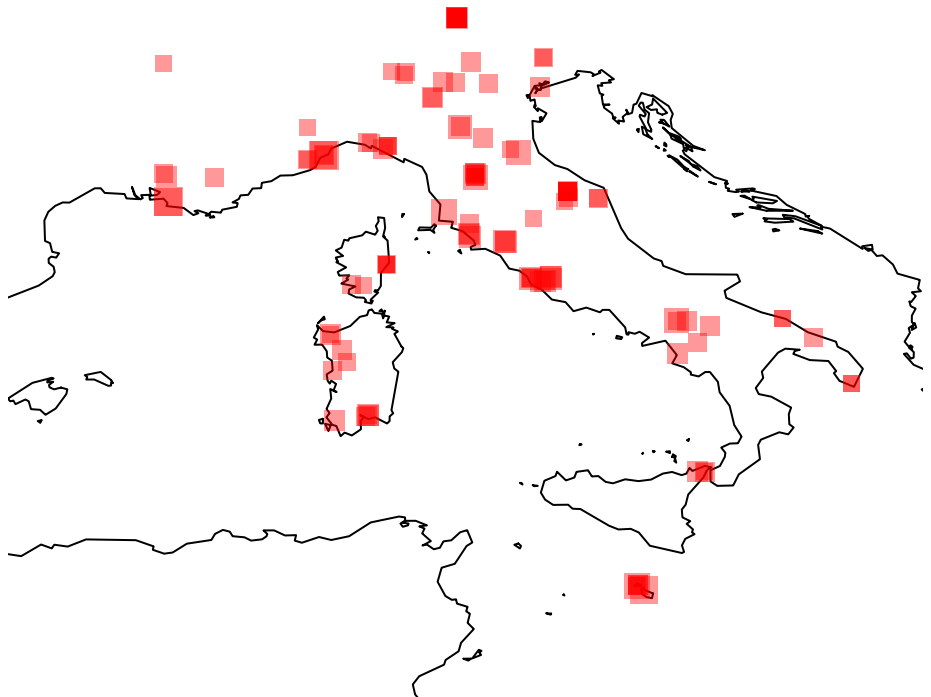



3045 cal. BC

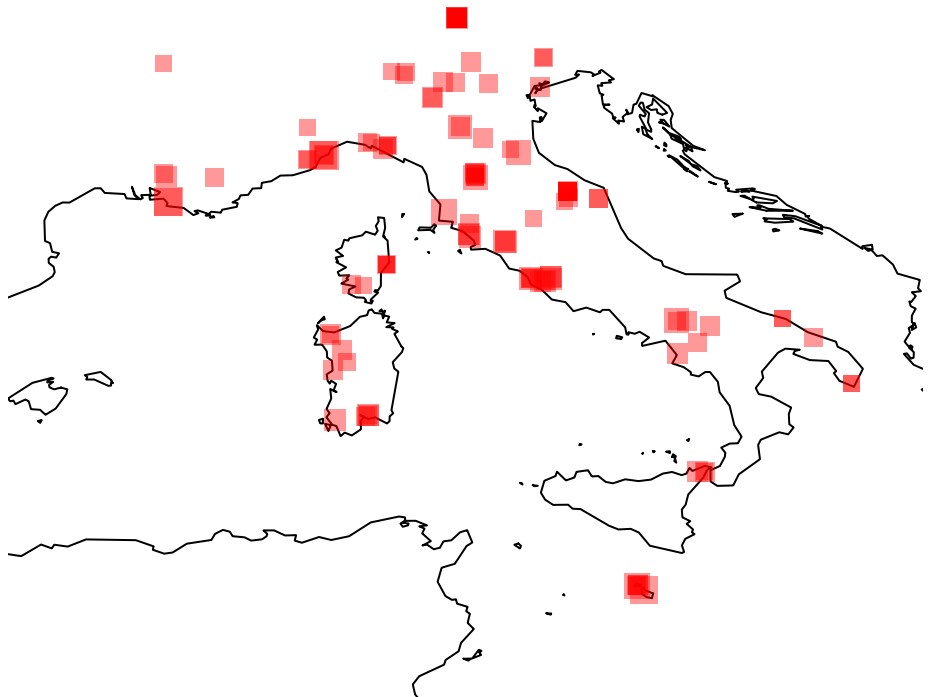

3040 cal. BC

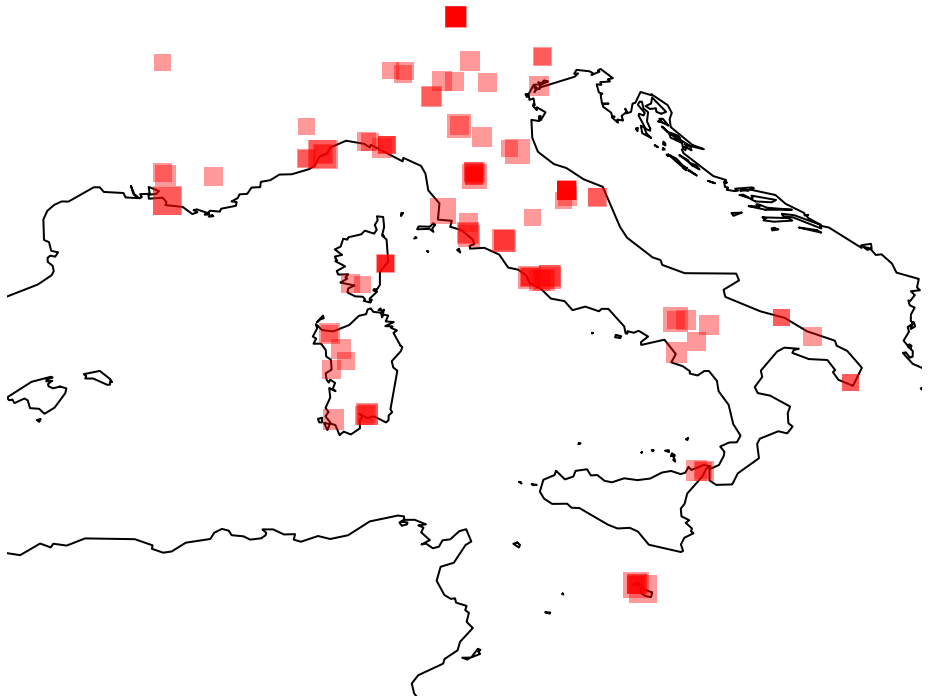

3035 cal. BC

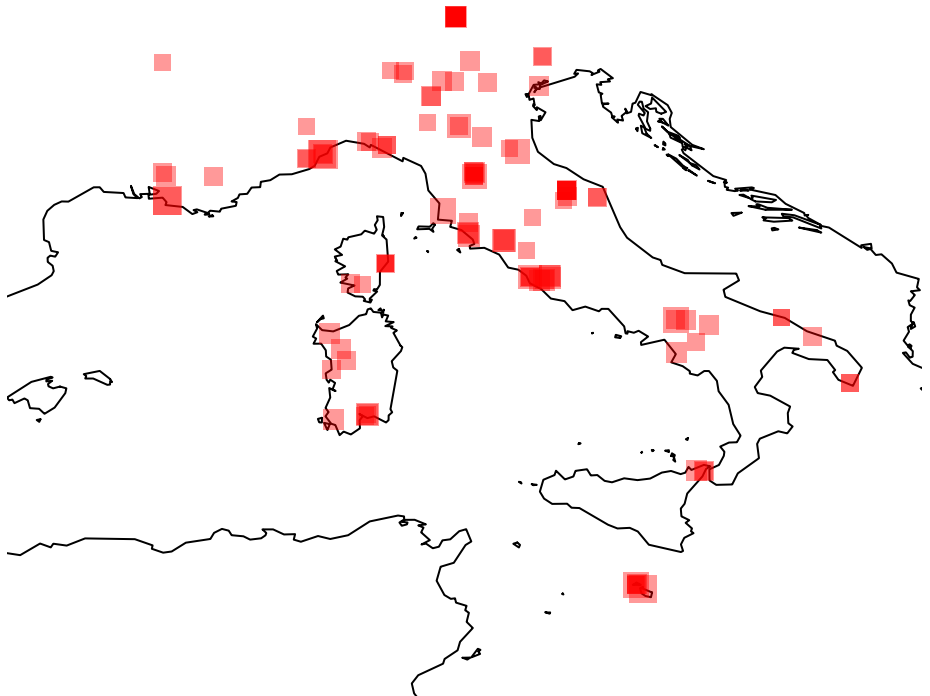

3030 cal. BC

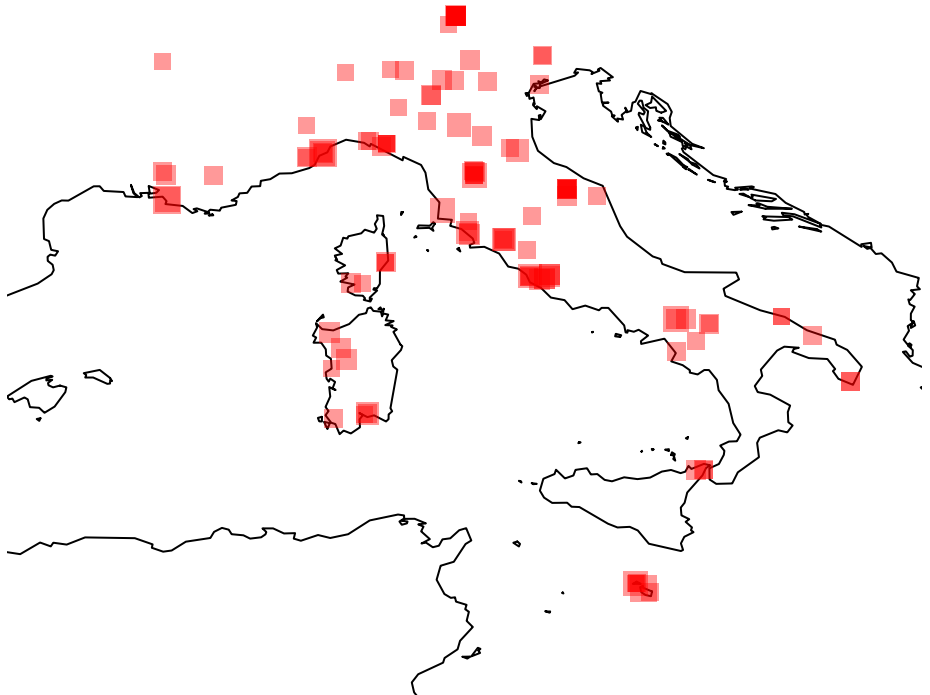

3025 cal. BC

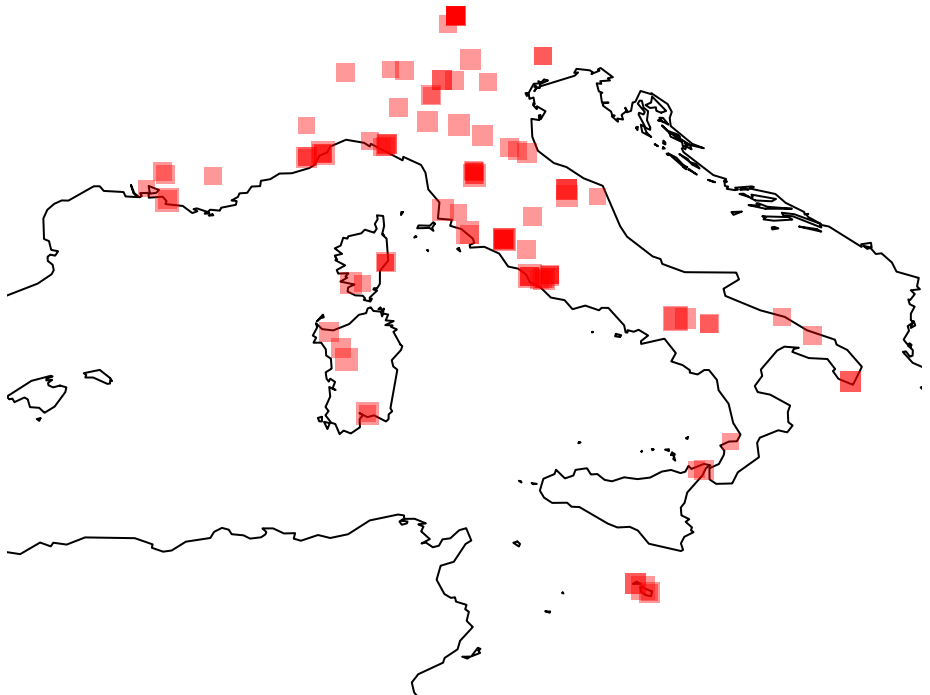

3020 cal. BC

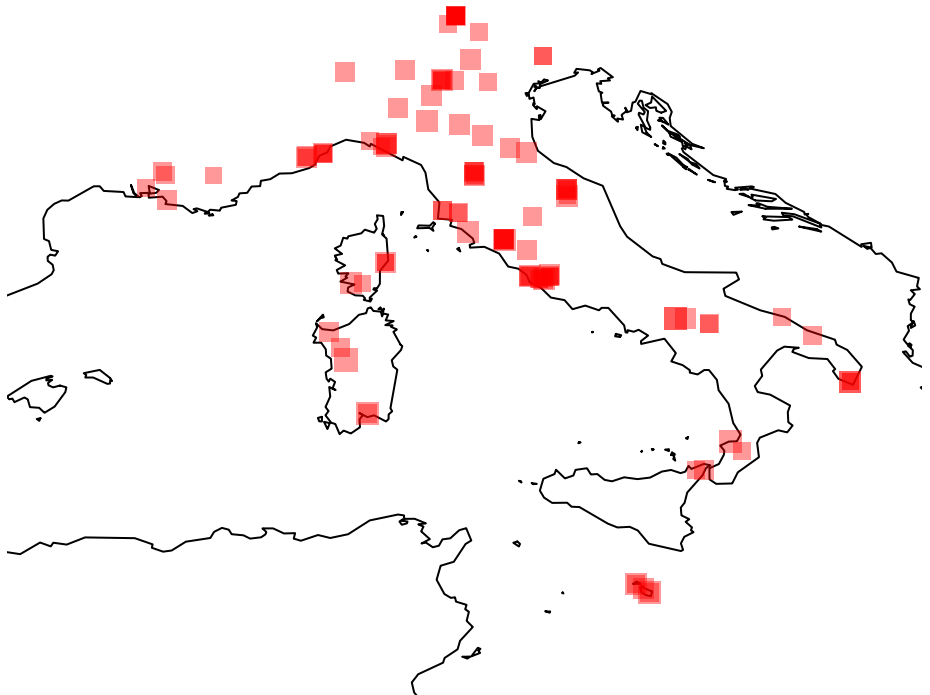

3015 cal. BC

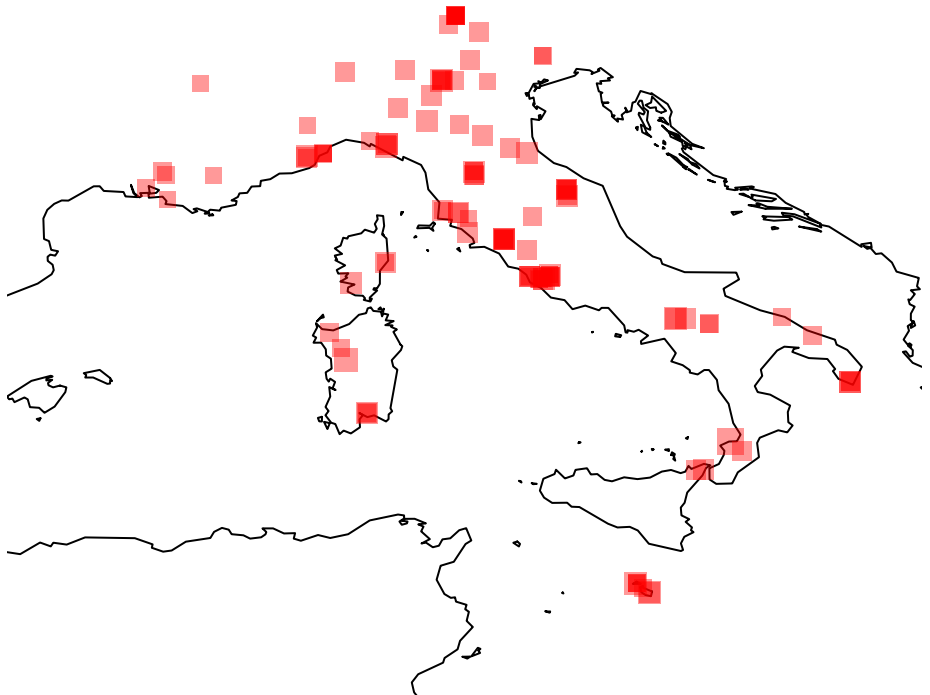

3010 cal. BC

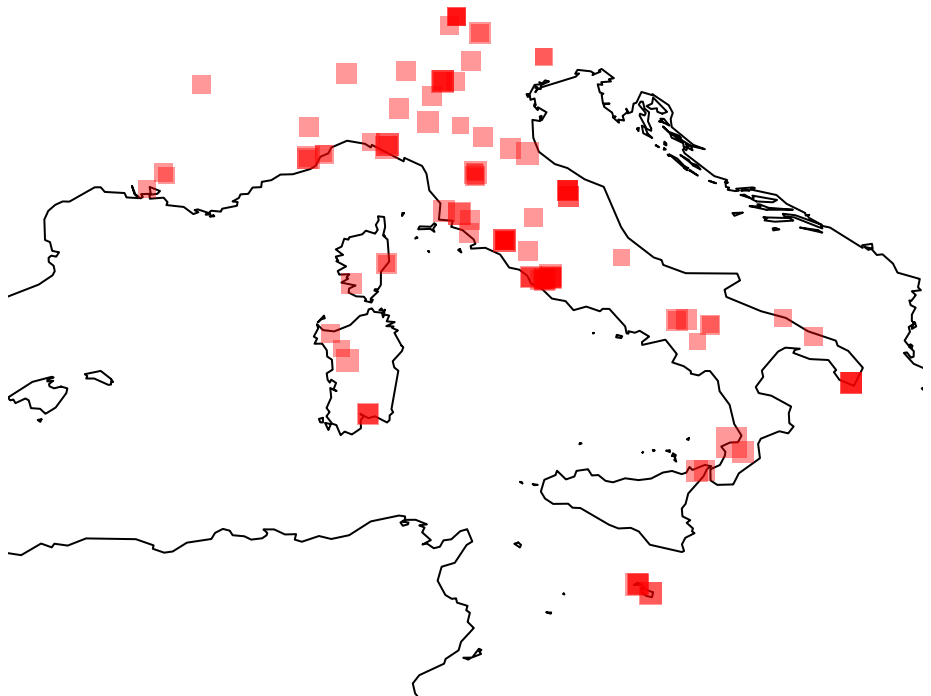





3000 cal. BC

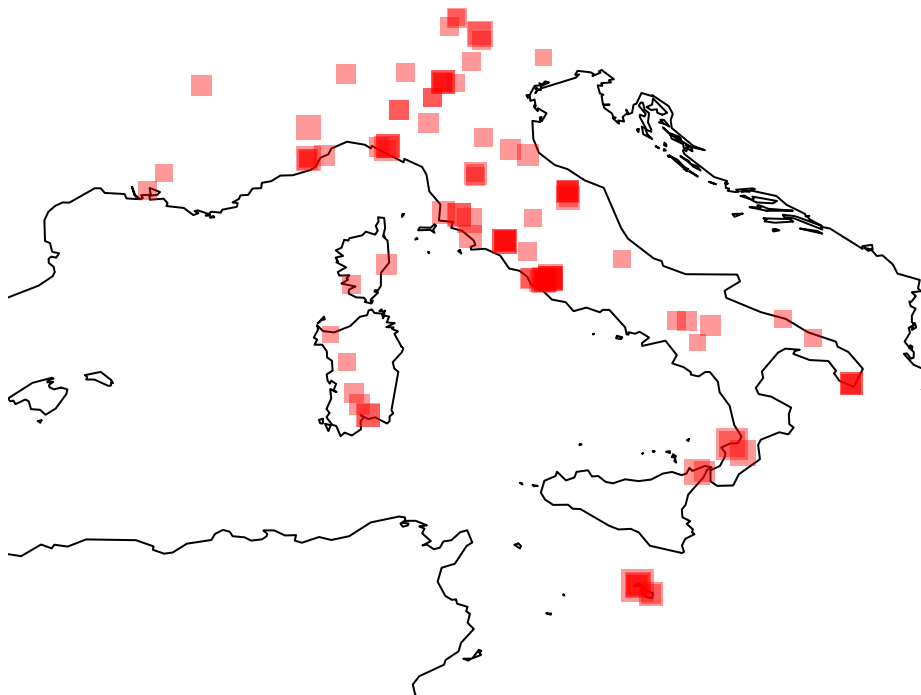

2995 cal. BC

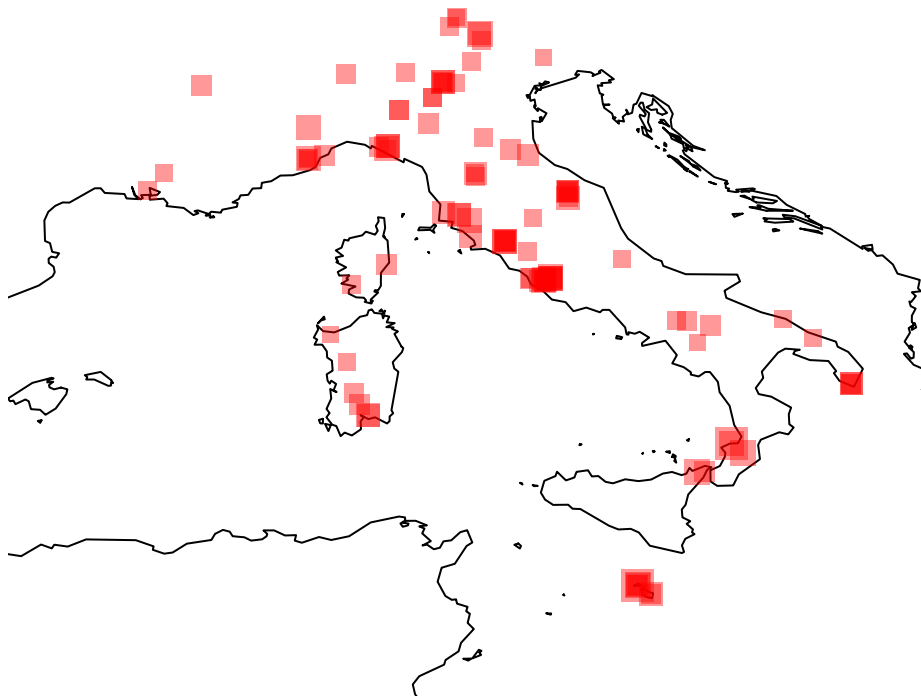

2990 cal. BC

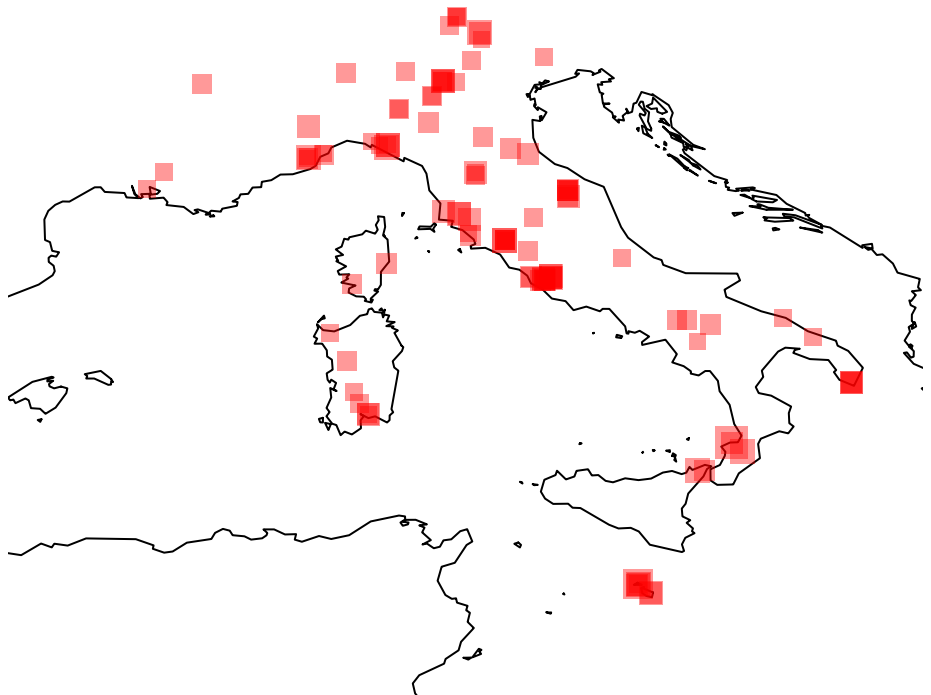



2980 cal. BC

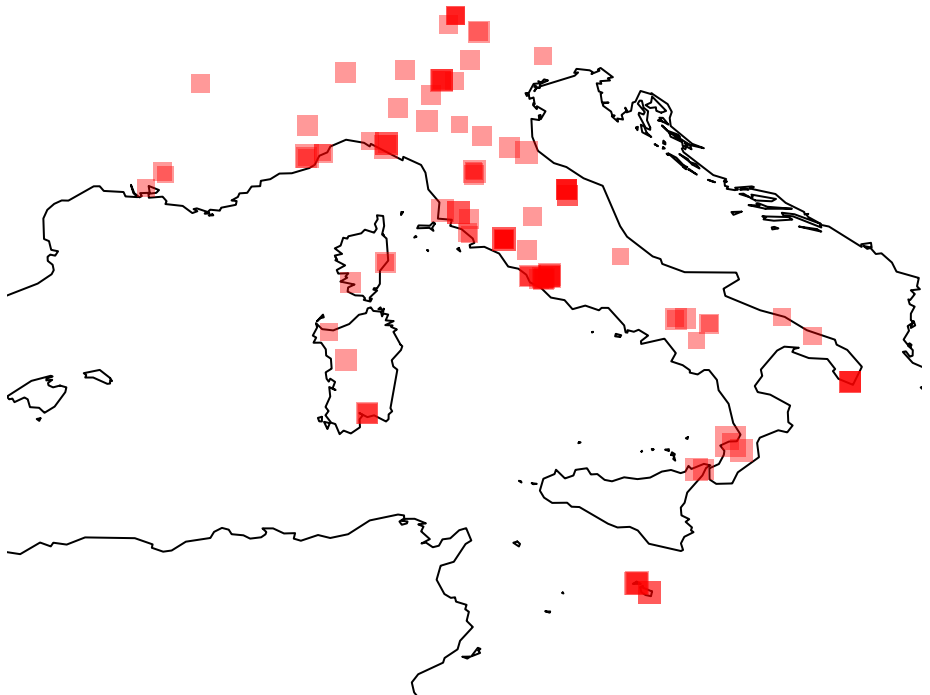

2975 cal. BC

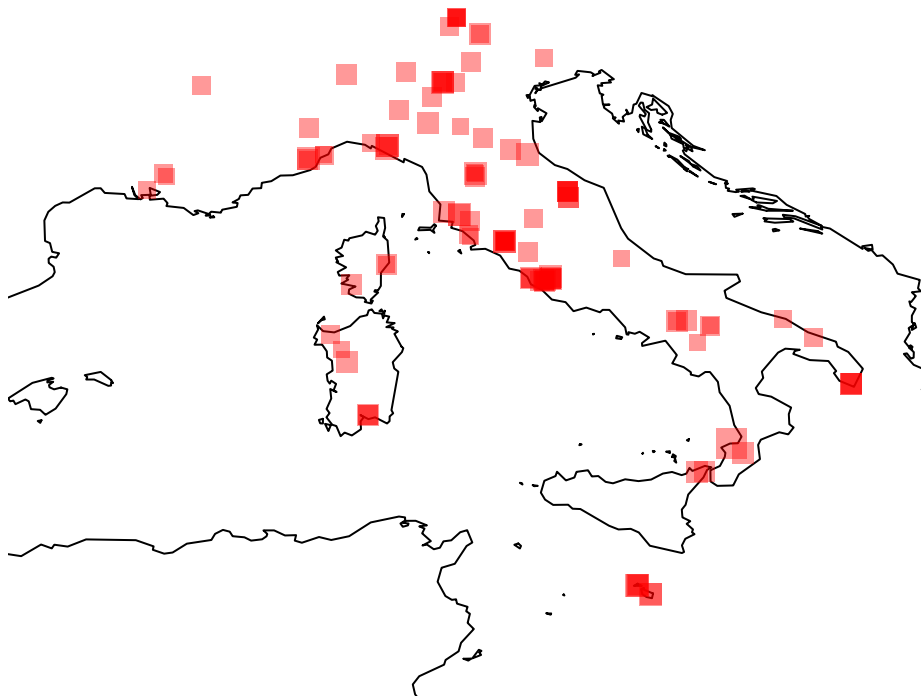

2970 cal. BC

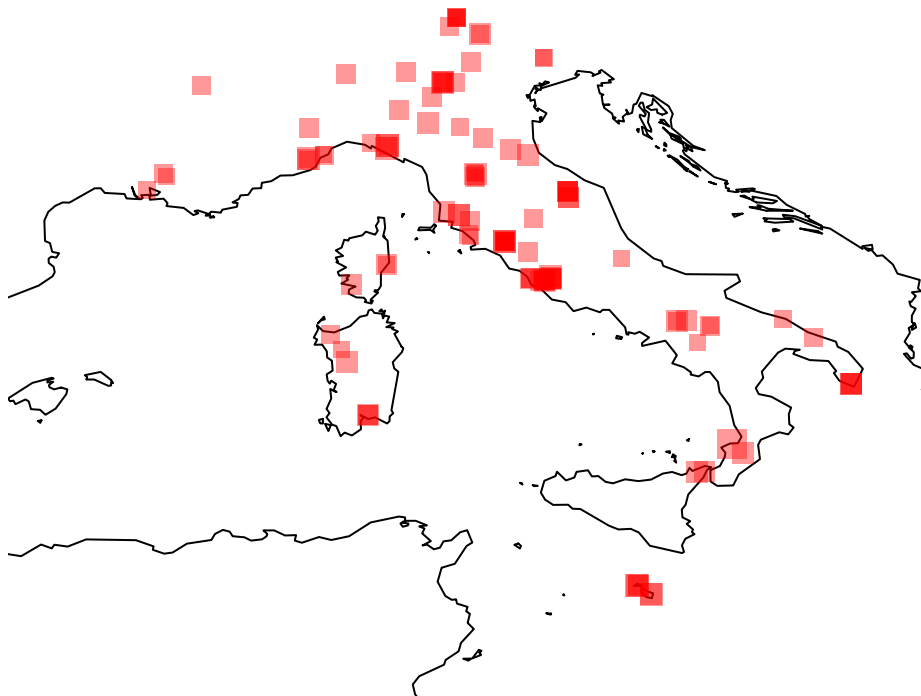



2965 cal. BC

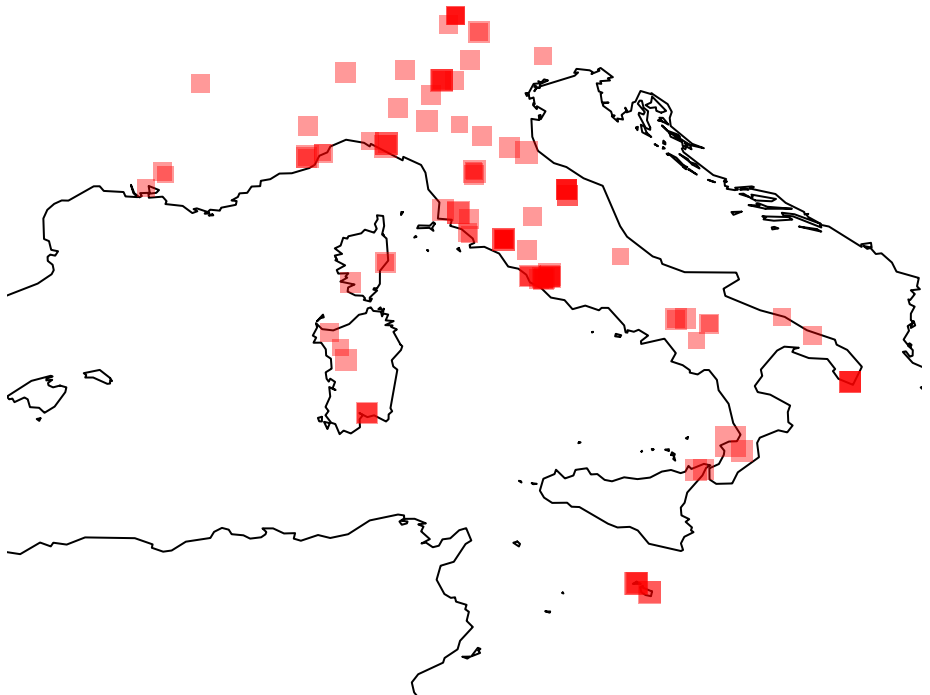

2960 cal. BC



2955 cal. BC

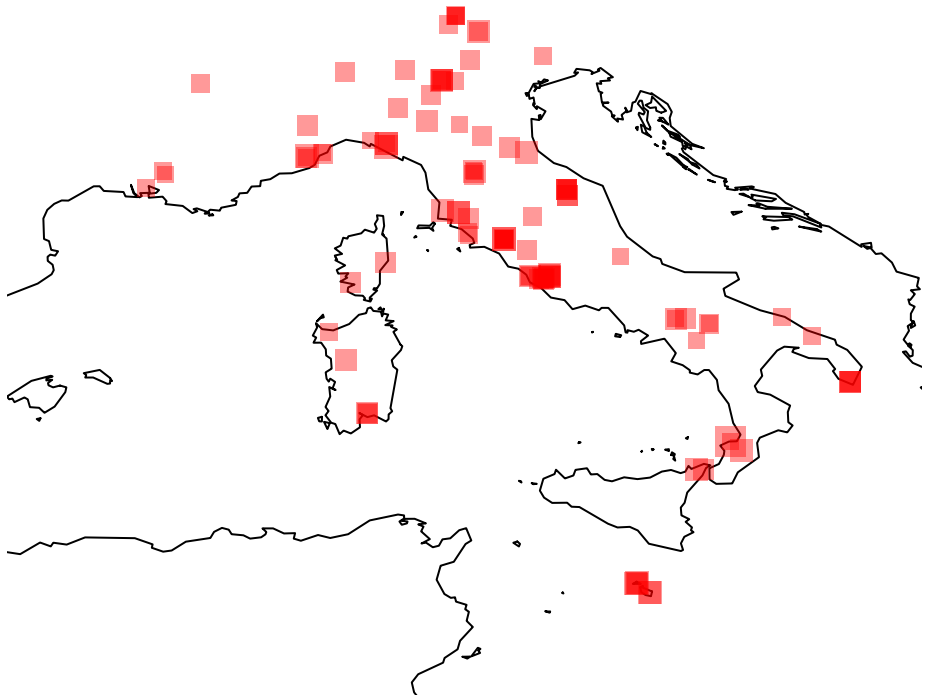

2950 cal. BC







2935 cal. BC

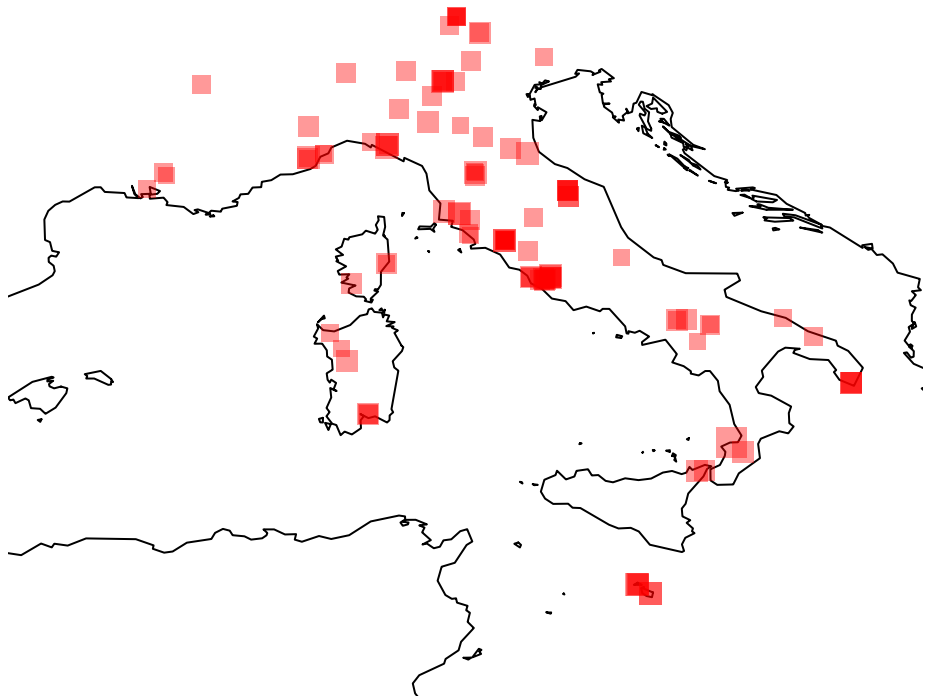

2930 cal. BC

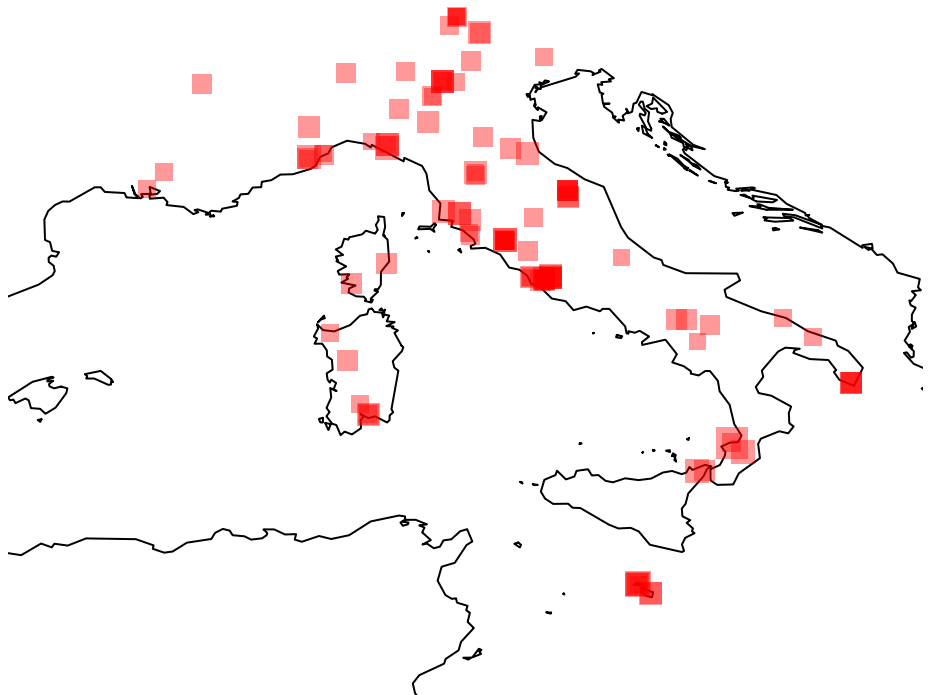



2925 cal. BC

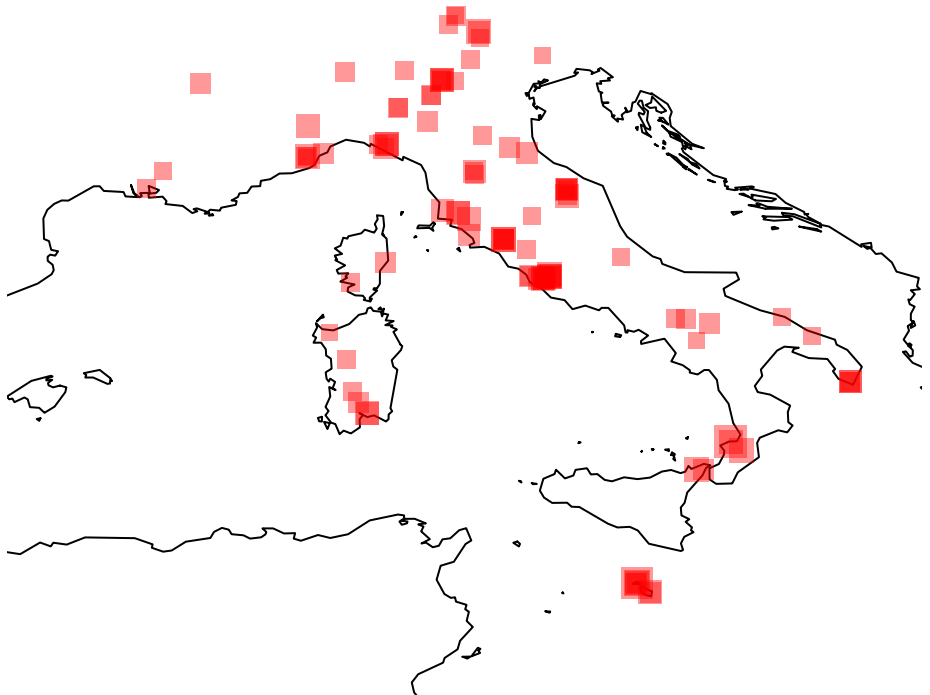

2920 cal. BC

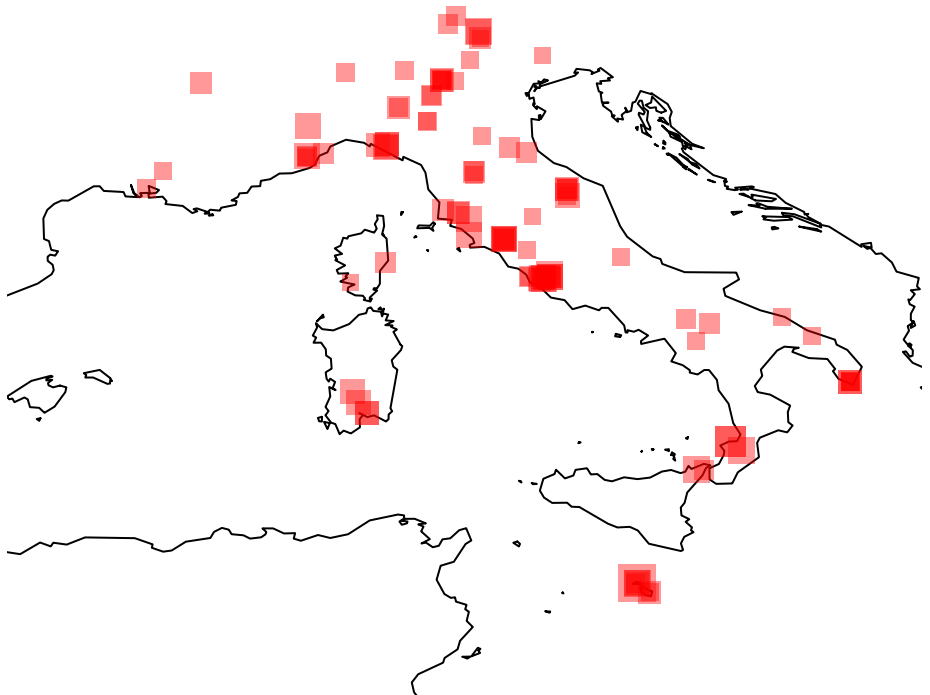

2915 cal. BC

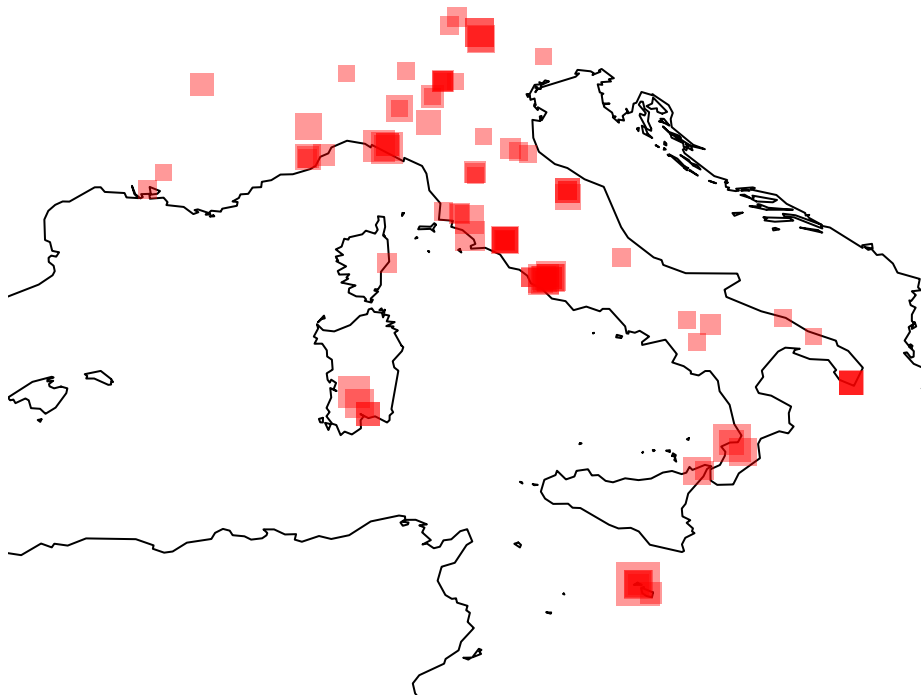

2910 cal. BC

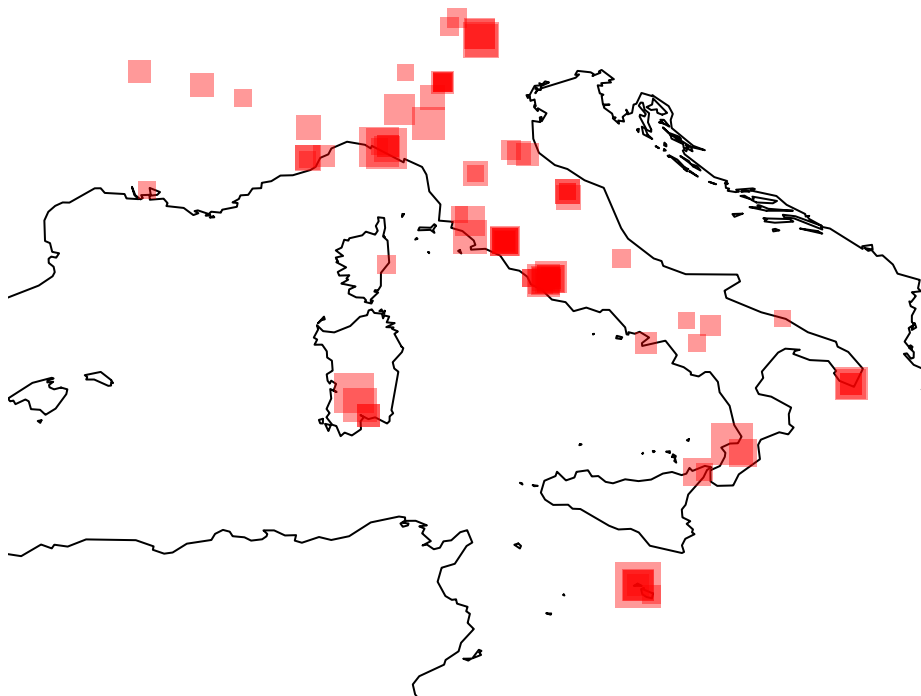

2905 cal. BC

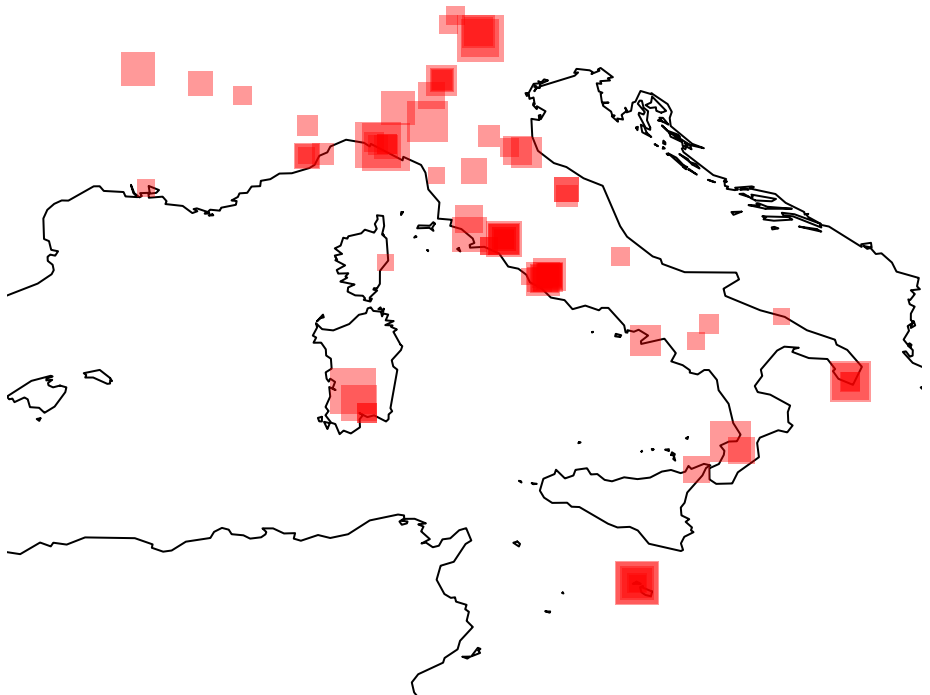

2900 cal. BC

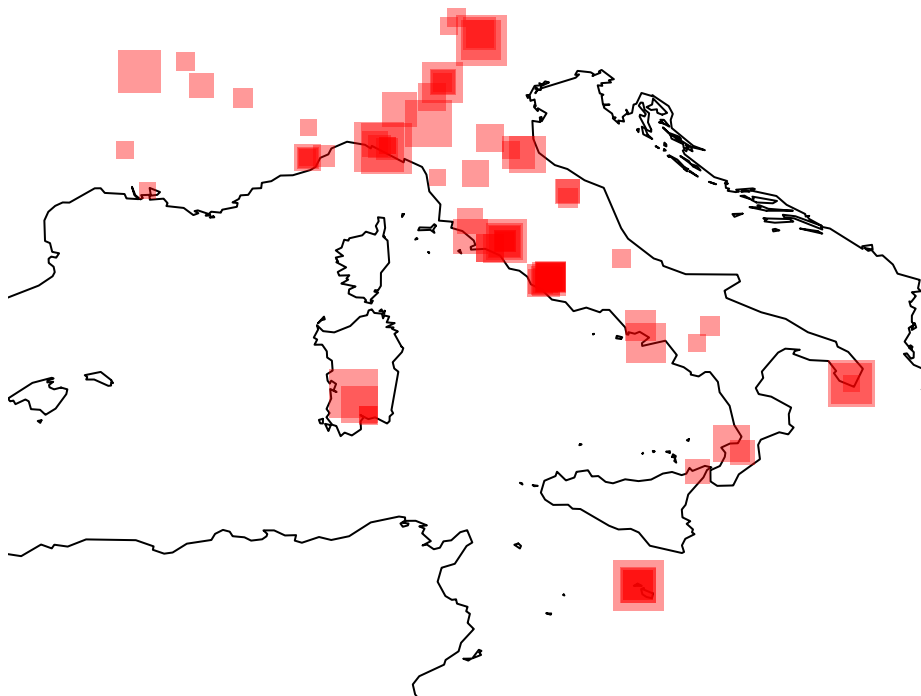

2895 cal. BC

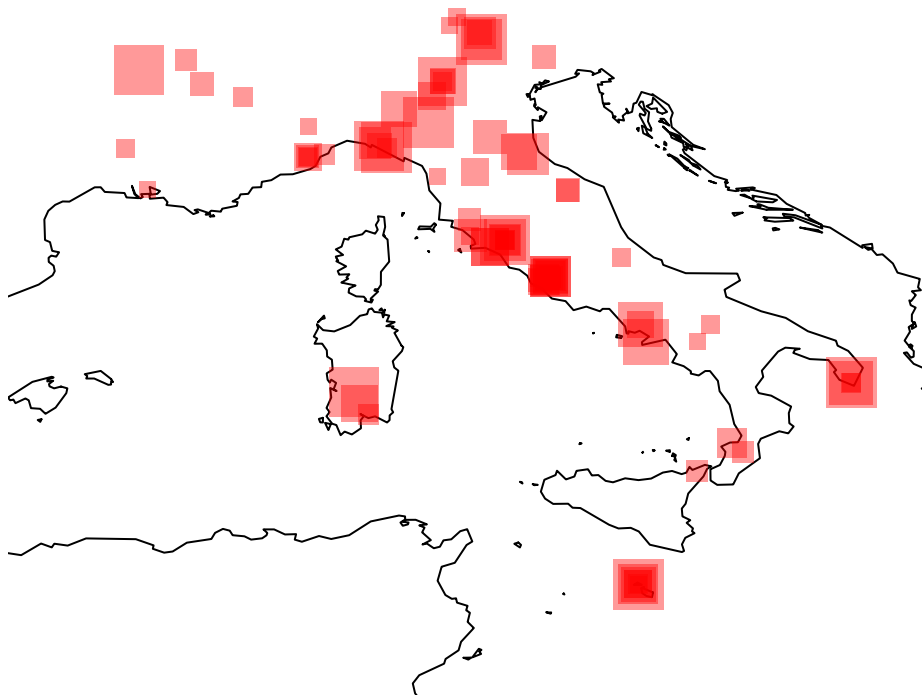

2890 cal. BC

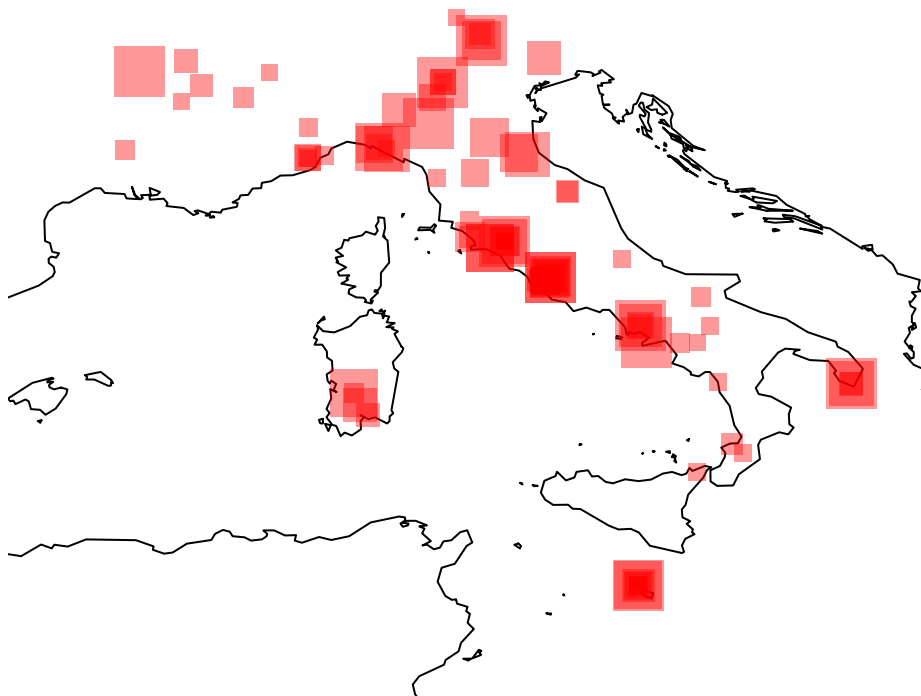



2885 cal. BC

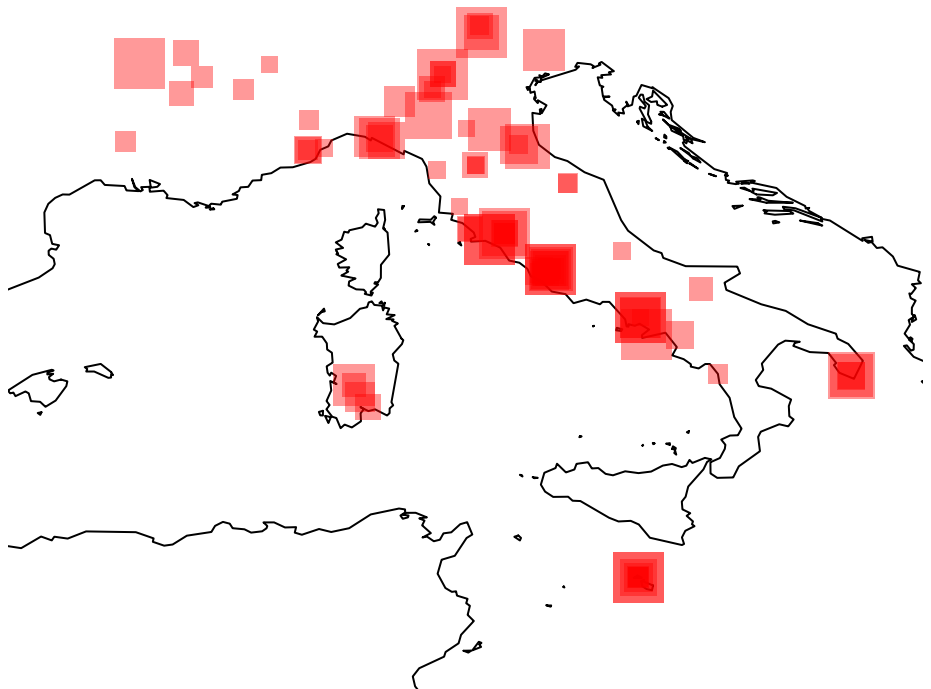

2880 cal. BC

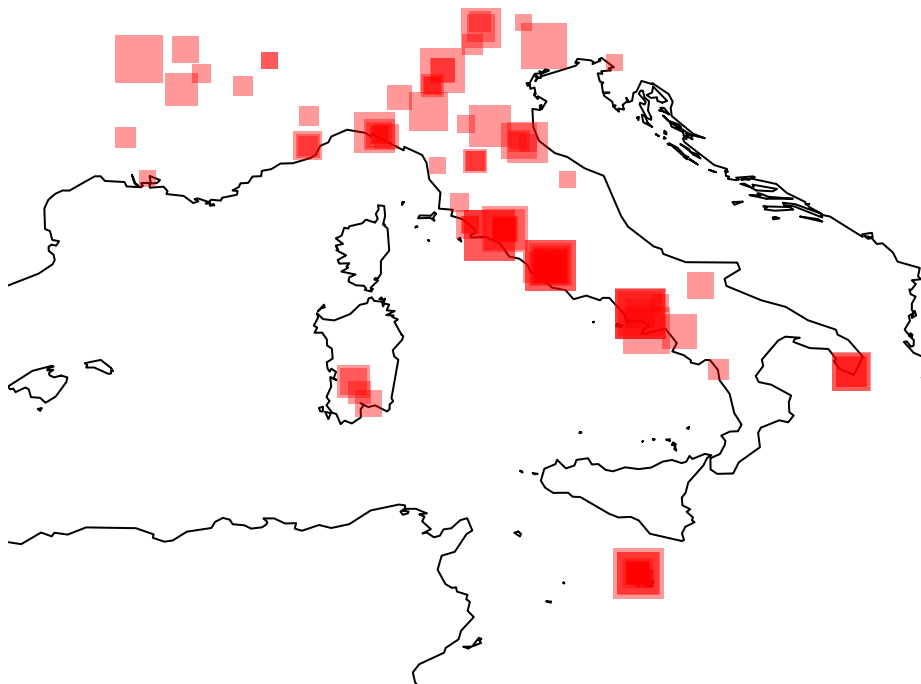

2875 cal. BC

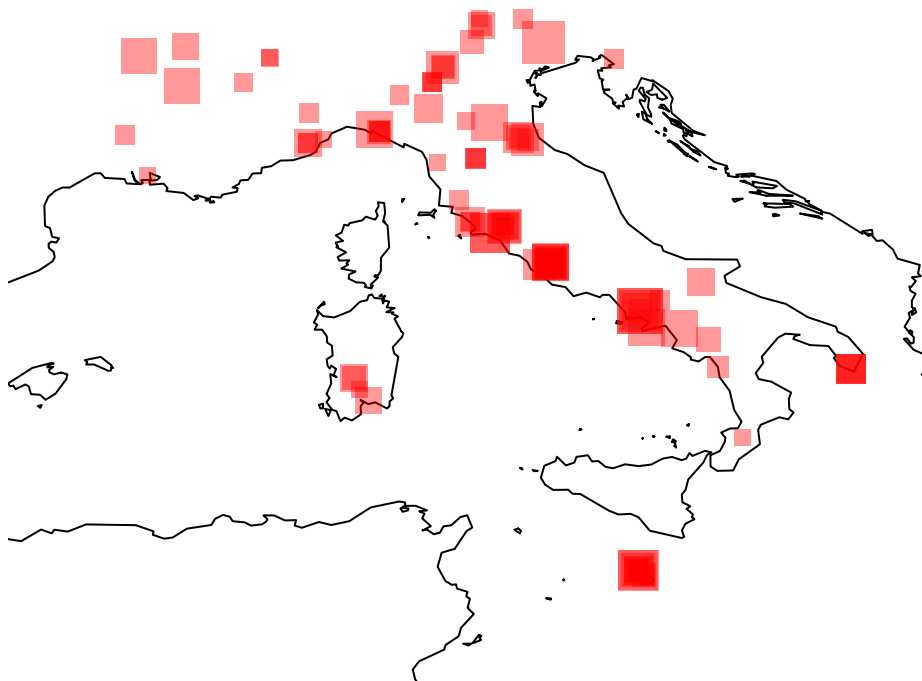

2870 cal. BC

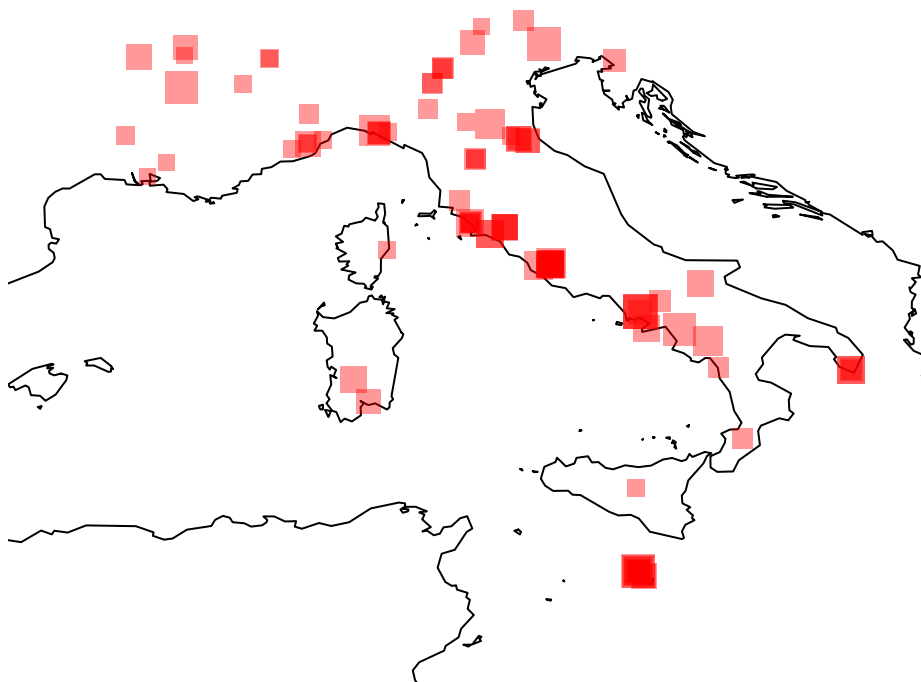

2865 cal. BC

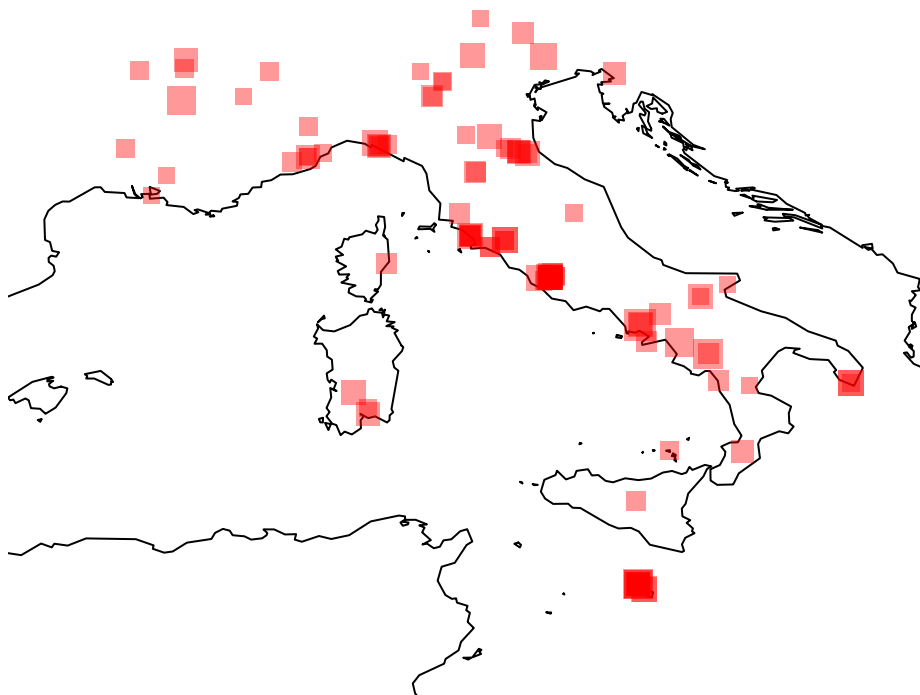

2860 cal. BC

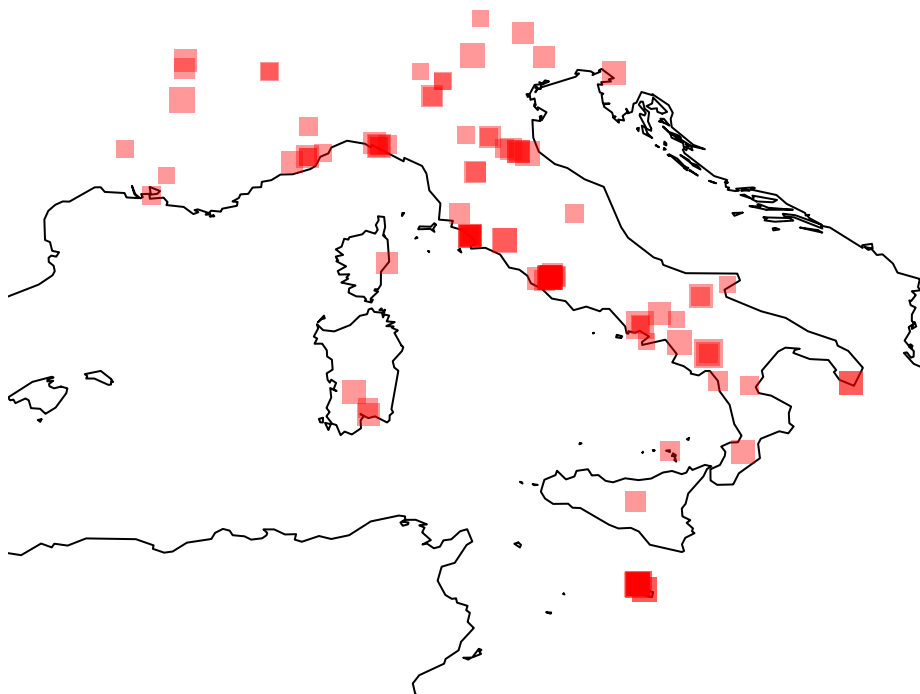

2855 cal. BC

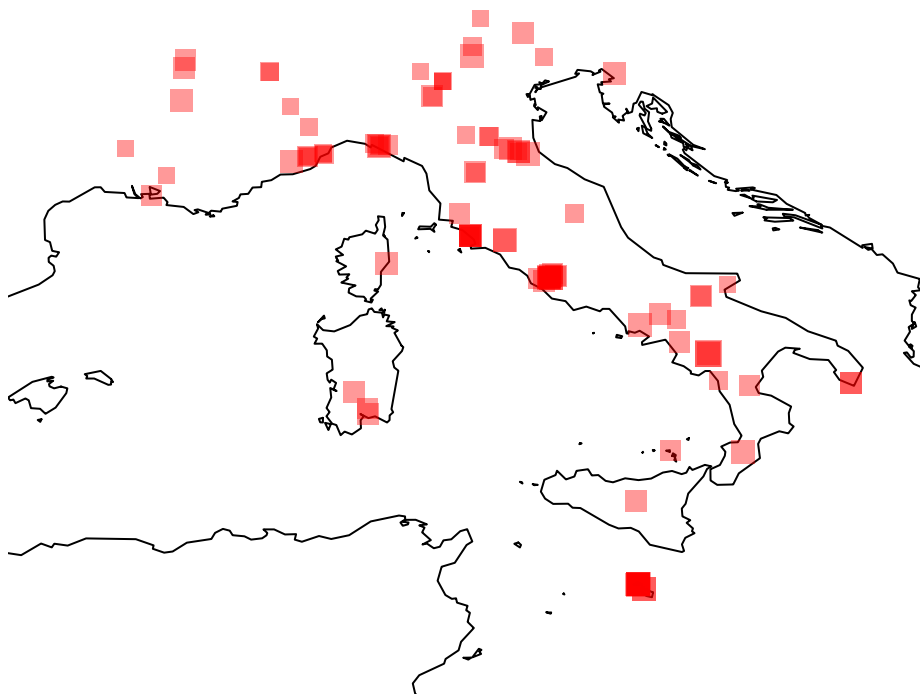

2850 cal. BC

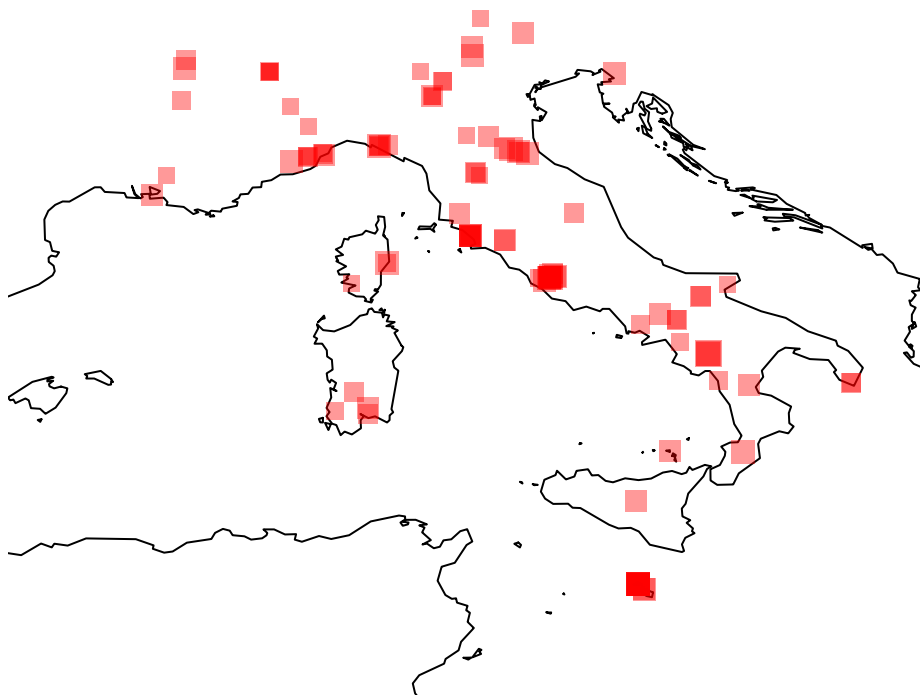



2845 cal. BC

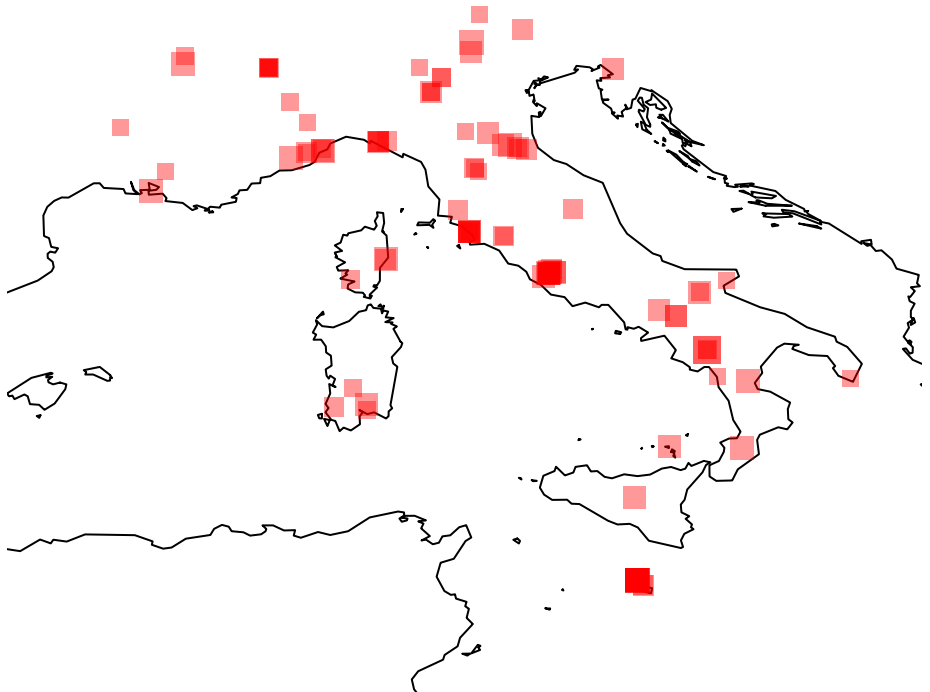

2840 cal. BC

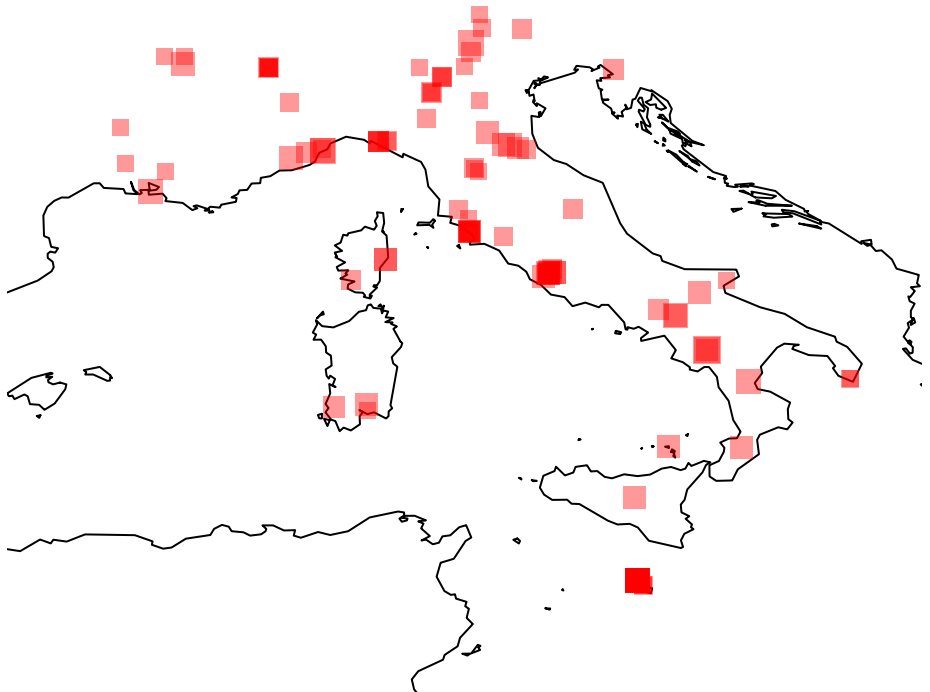

2835 cal. BC

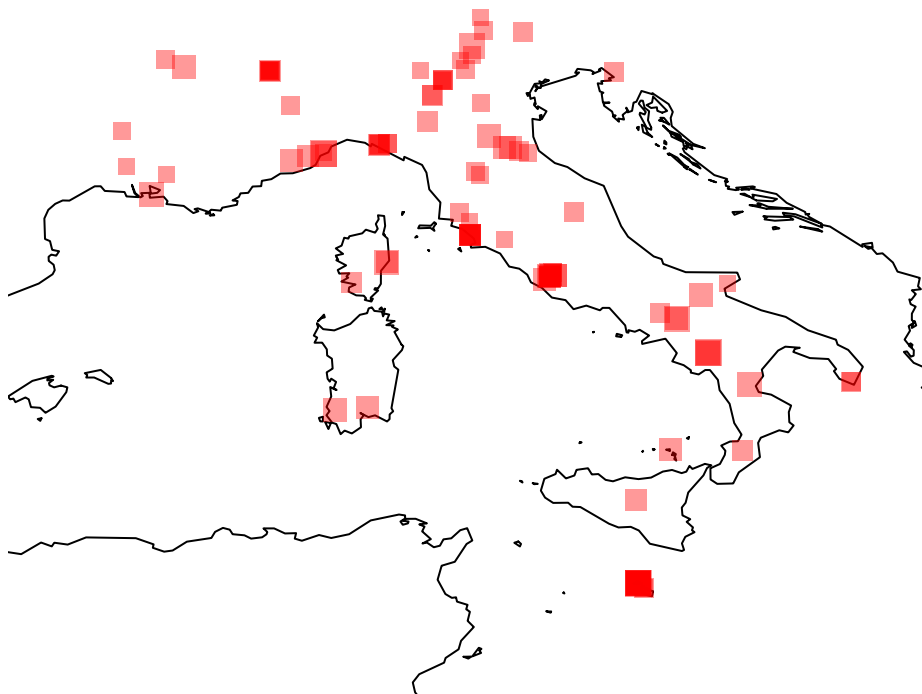





2820 cal. BC

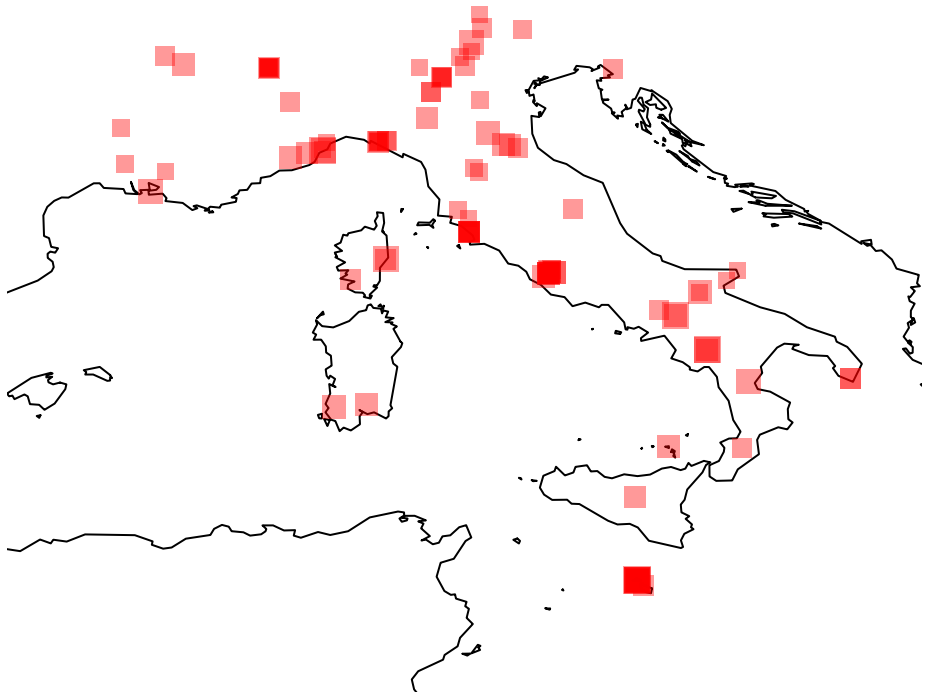

2815 cal. BC

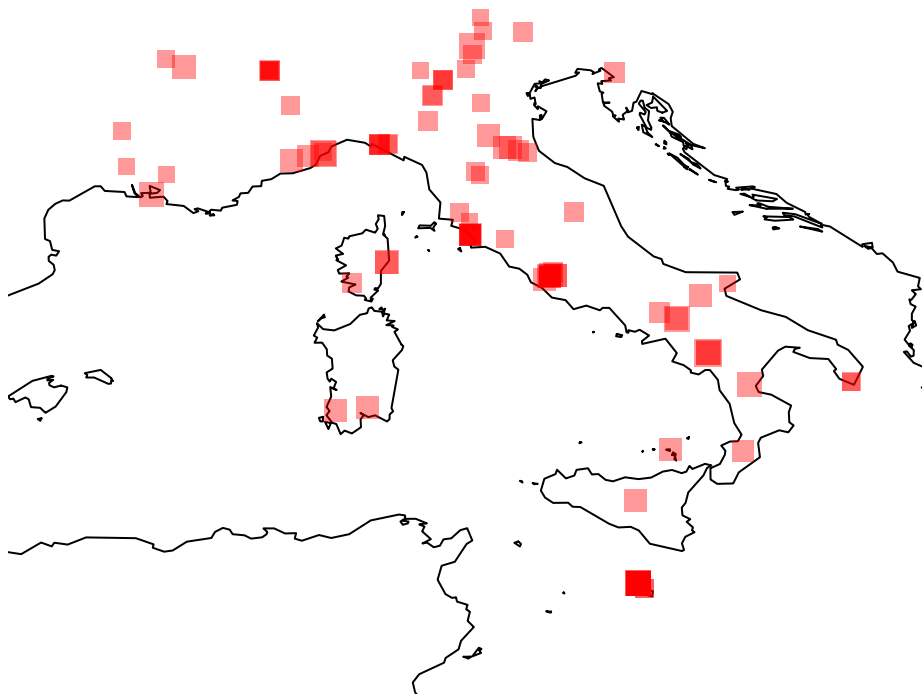





2805 cal. BC

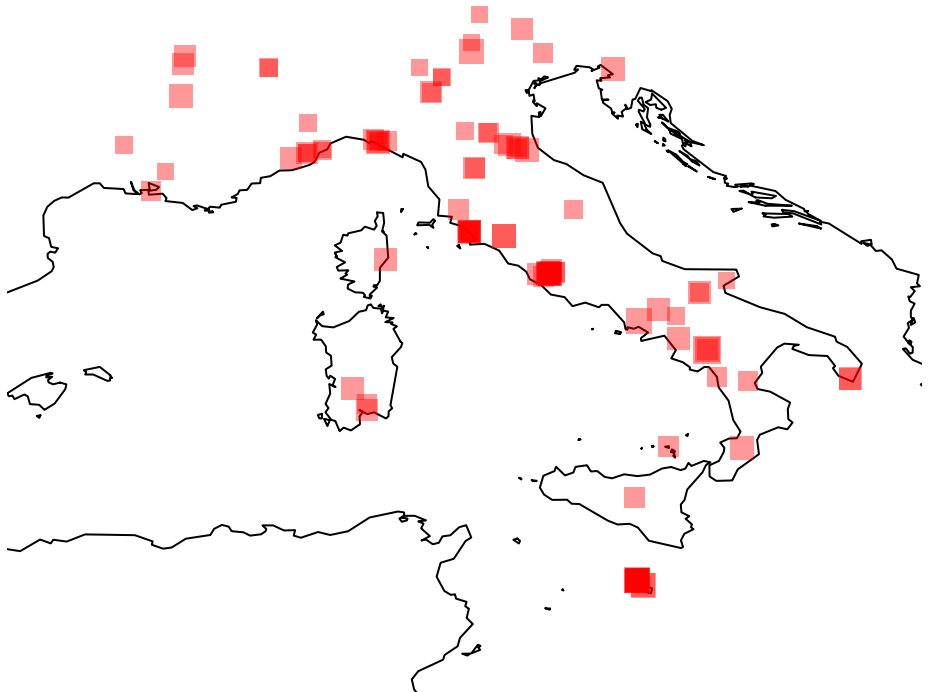

2800 cal. BC

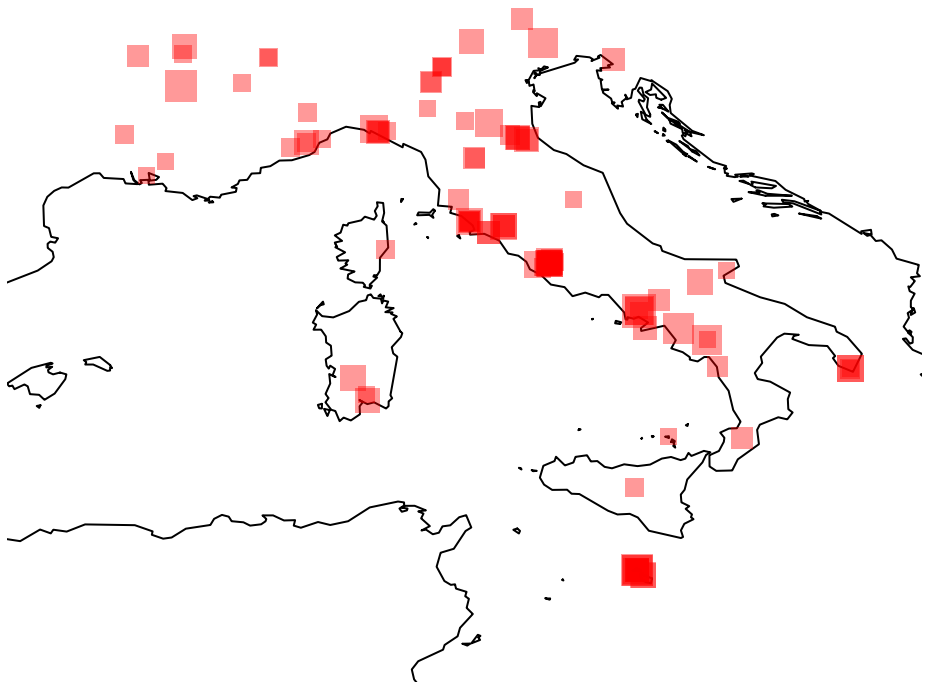

2795 cal. BC

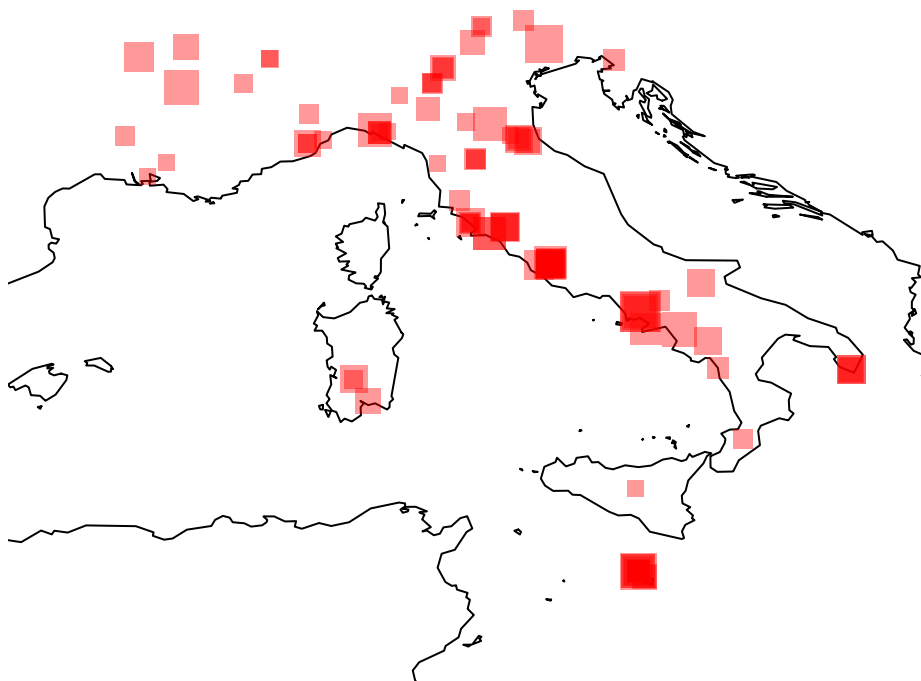

2790 cal. BC

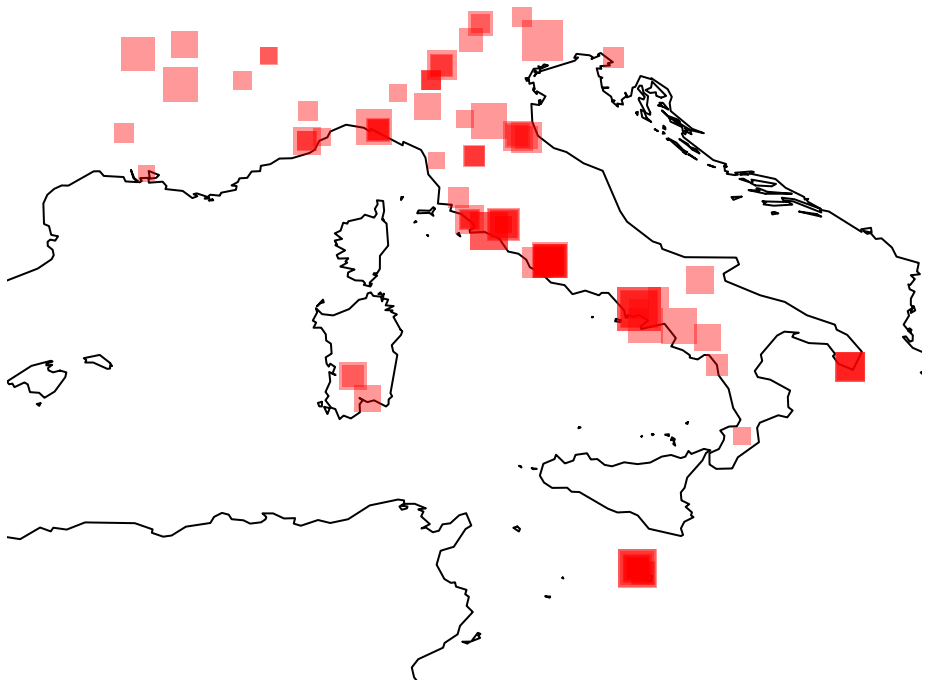

2785 cal. BC

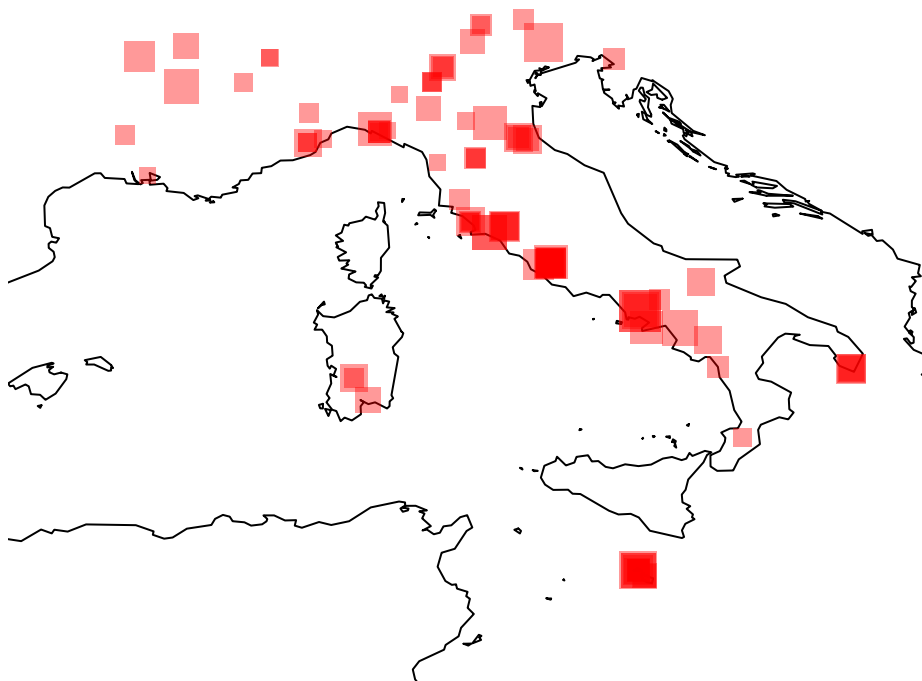

2780 cal. BC

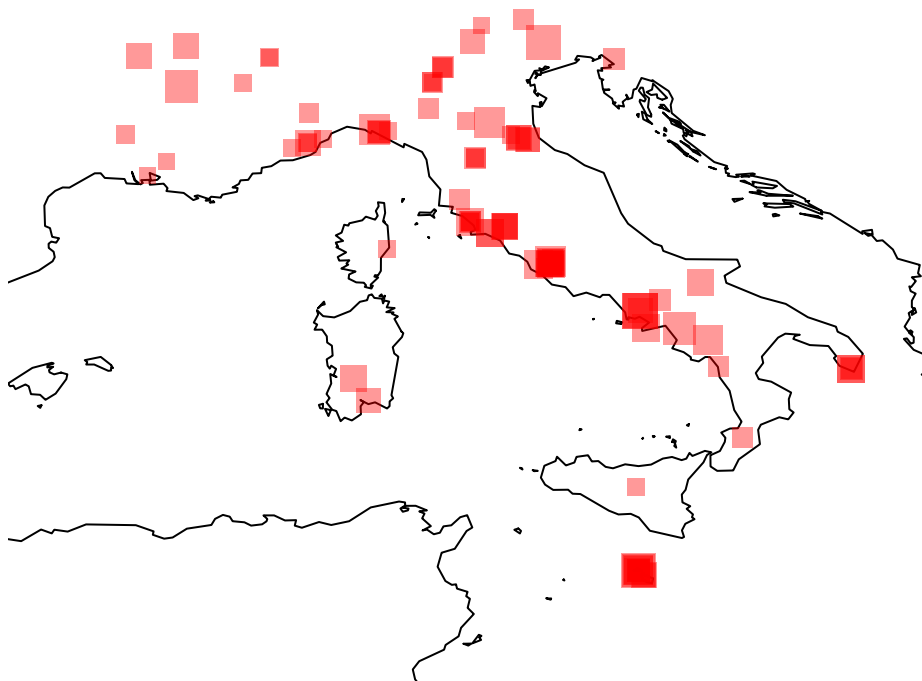

2775 cal. BC

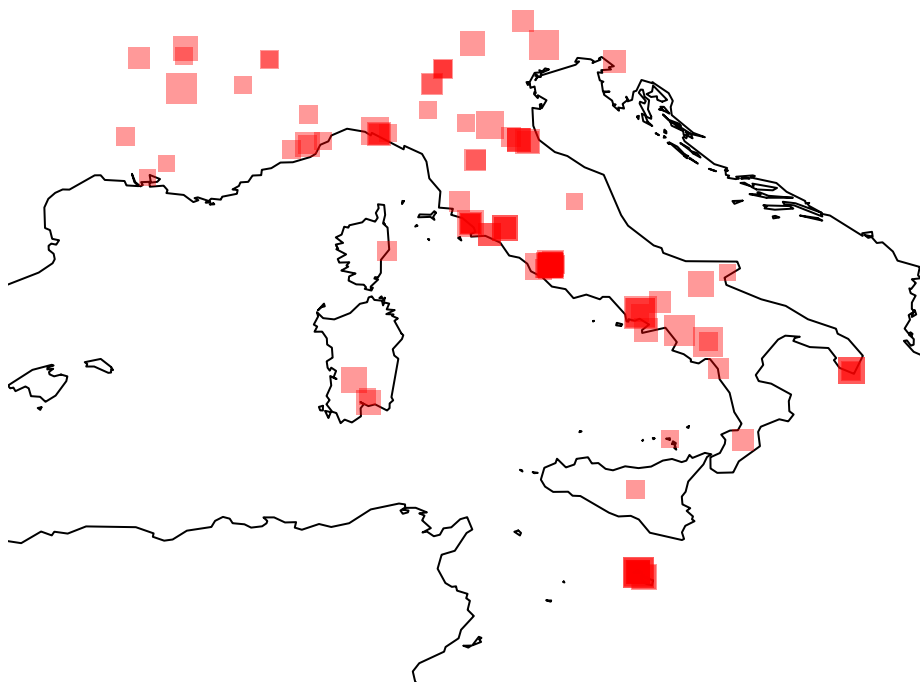

2770 cal. BC

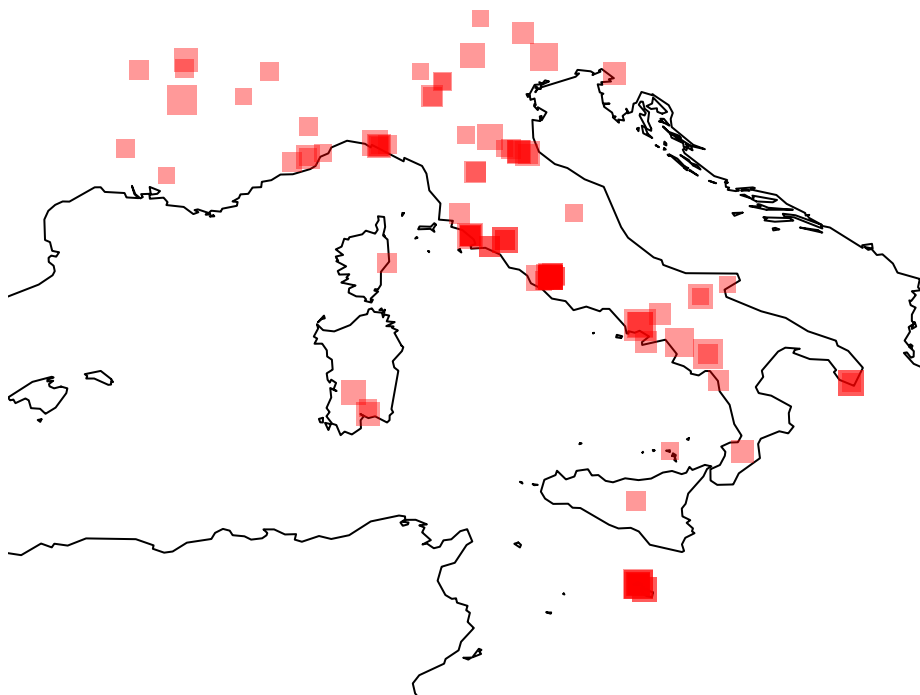



2765 cal. BC

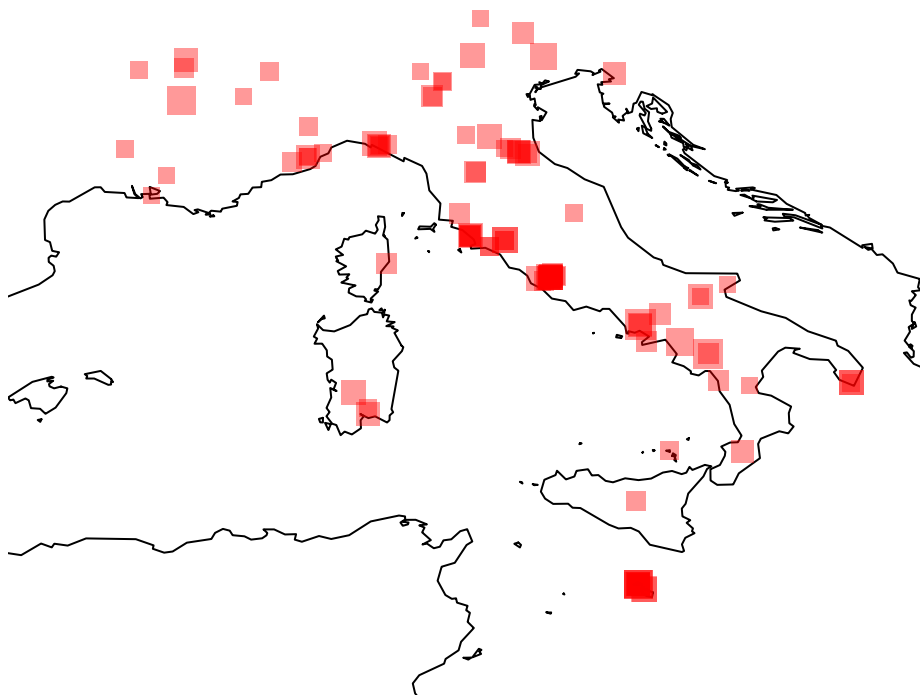

2760 cal. BC

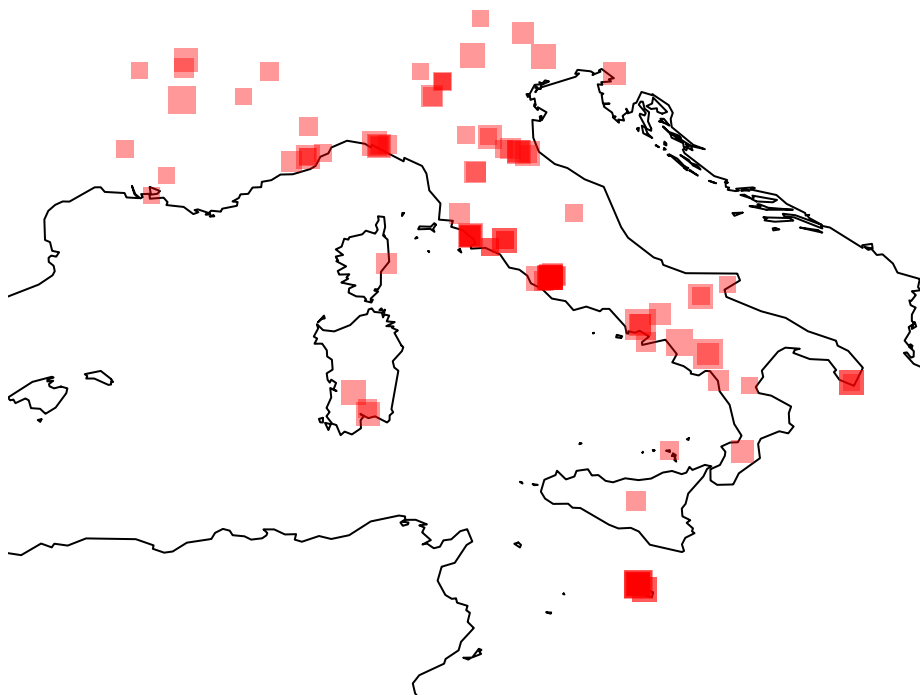

2755 cal. BC

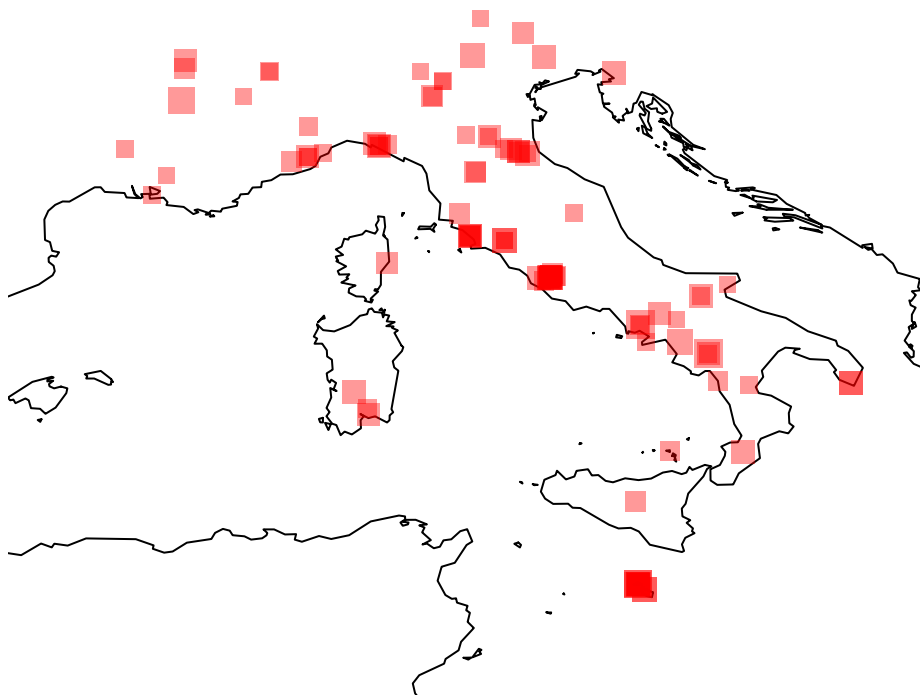

2750 cal. BC

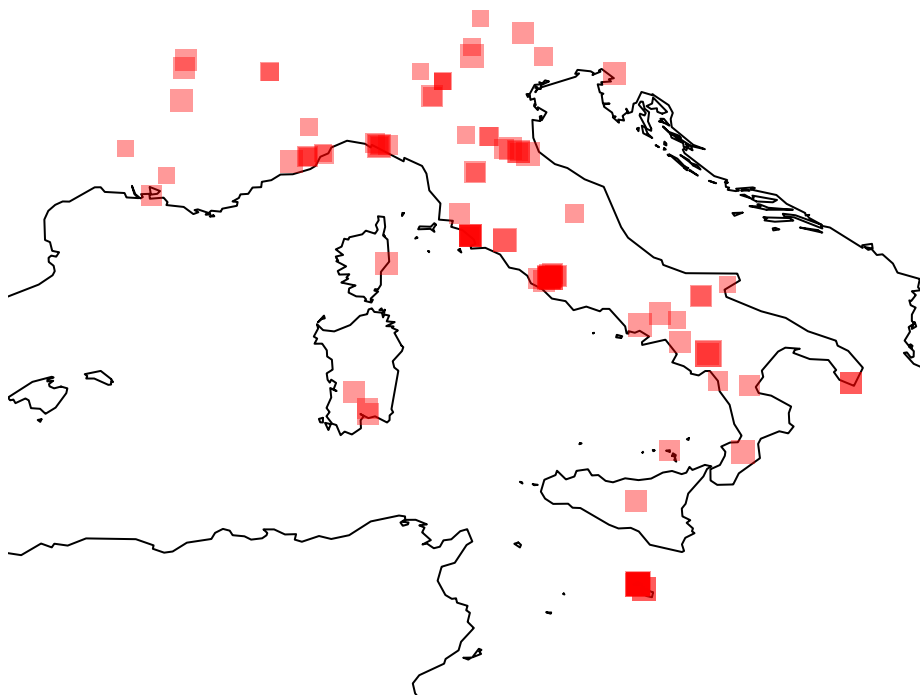



2740 cal. BC

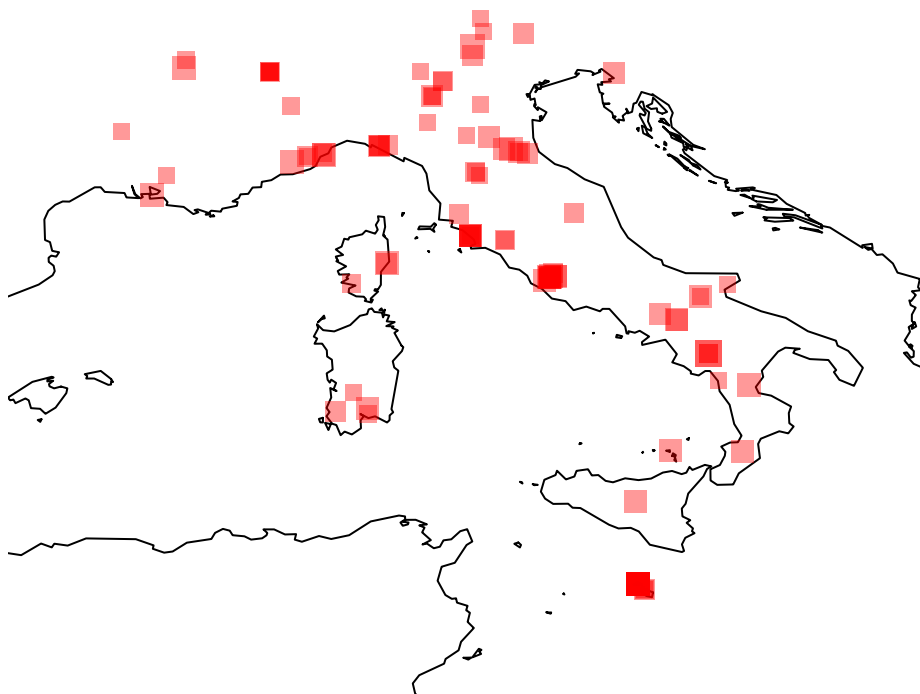

2735 cal. BC

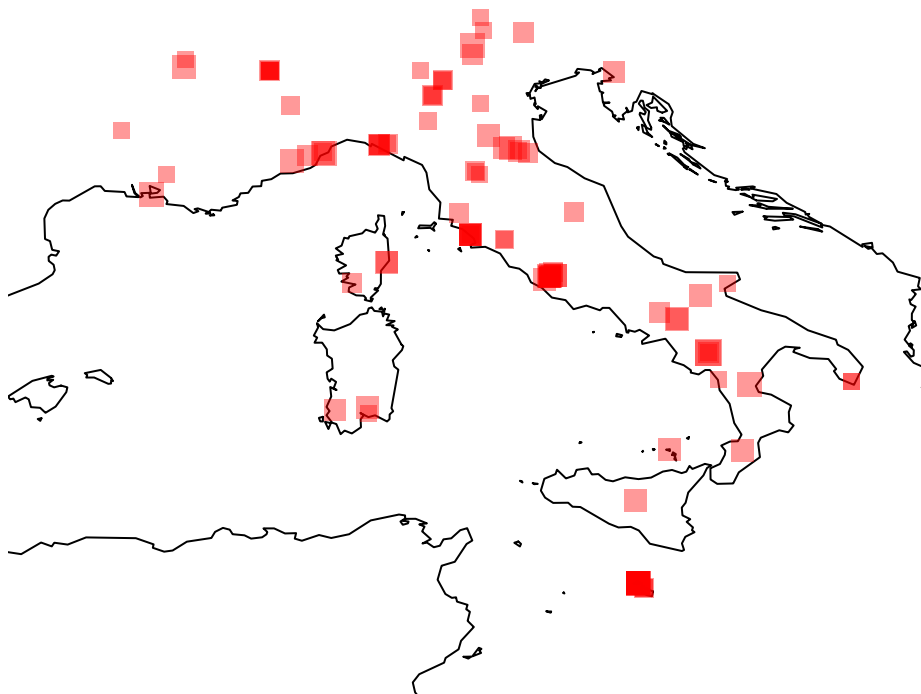

2730 cal. BC

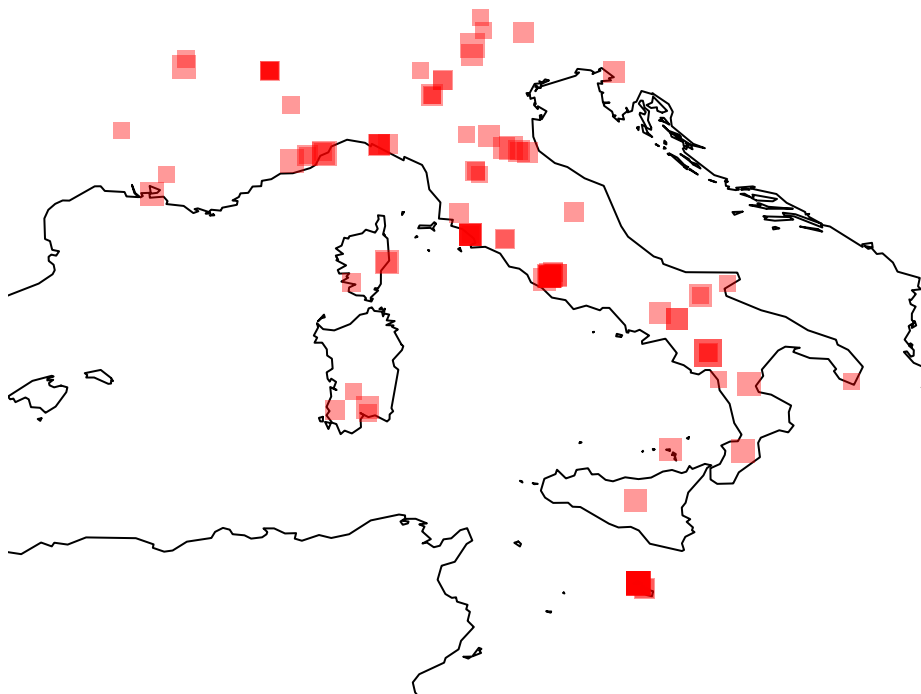



2725 cal. BC

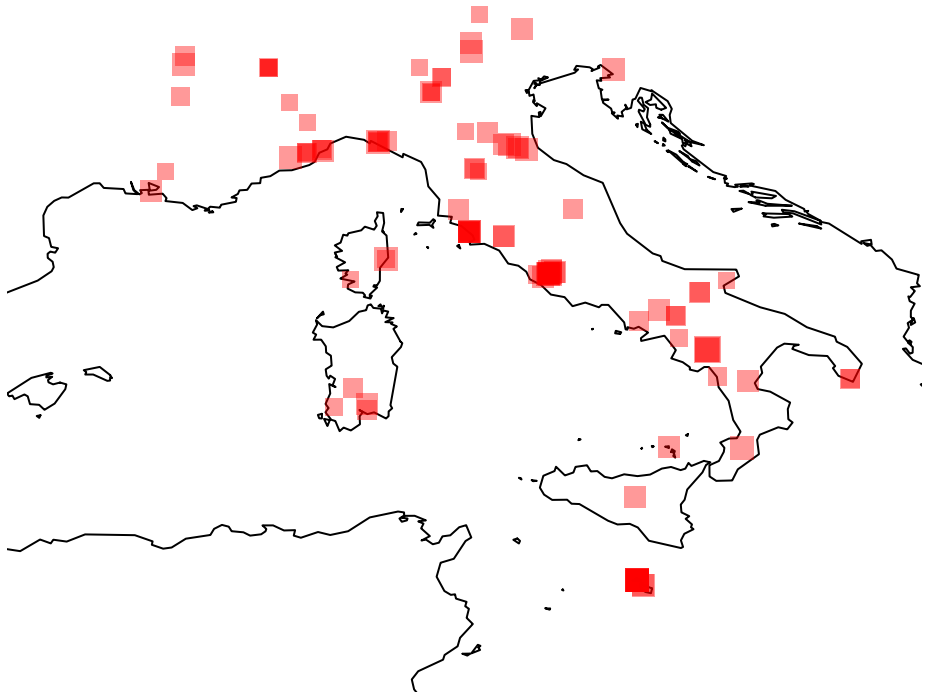



2715 cal. BC



2710 cal. BC

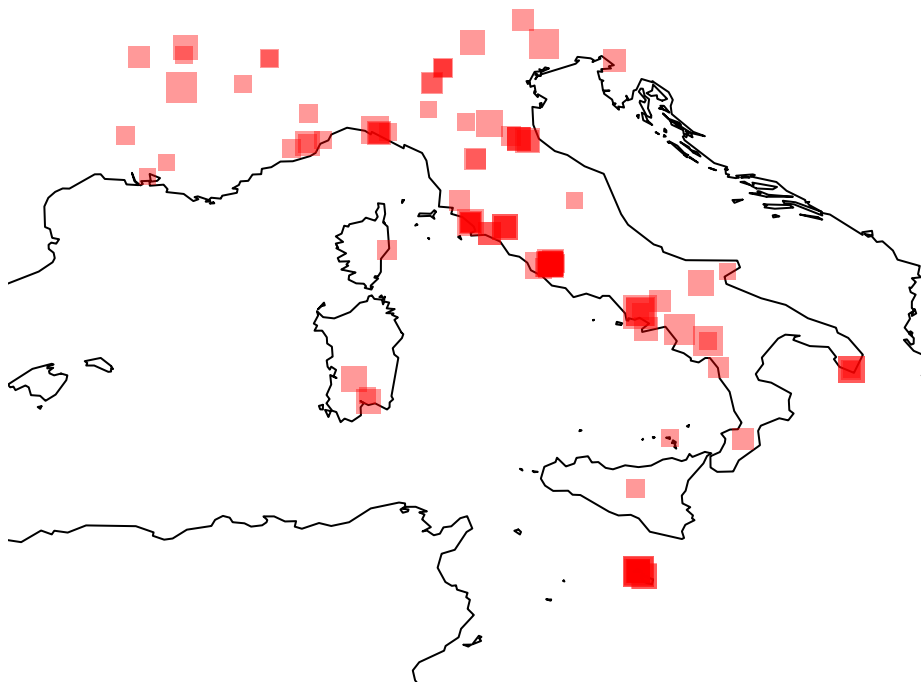

2705 cal. BC



2700 cal. BC

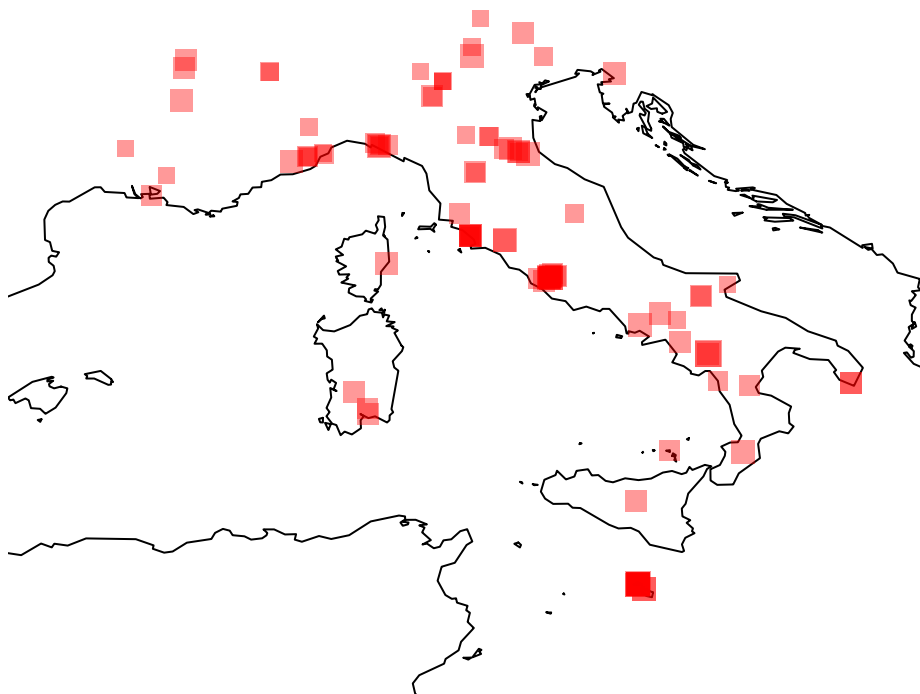

2695 cal. BC

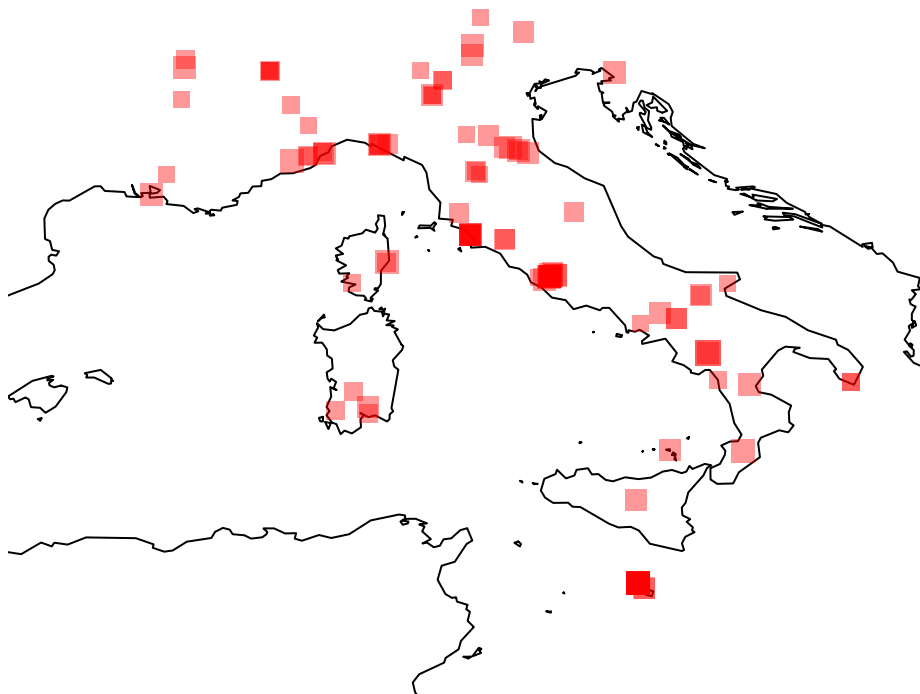

2690 cal. BC

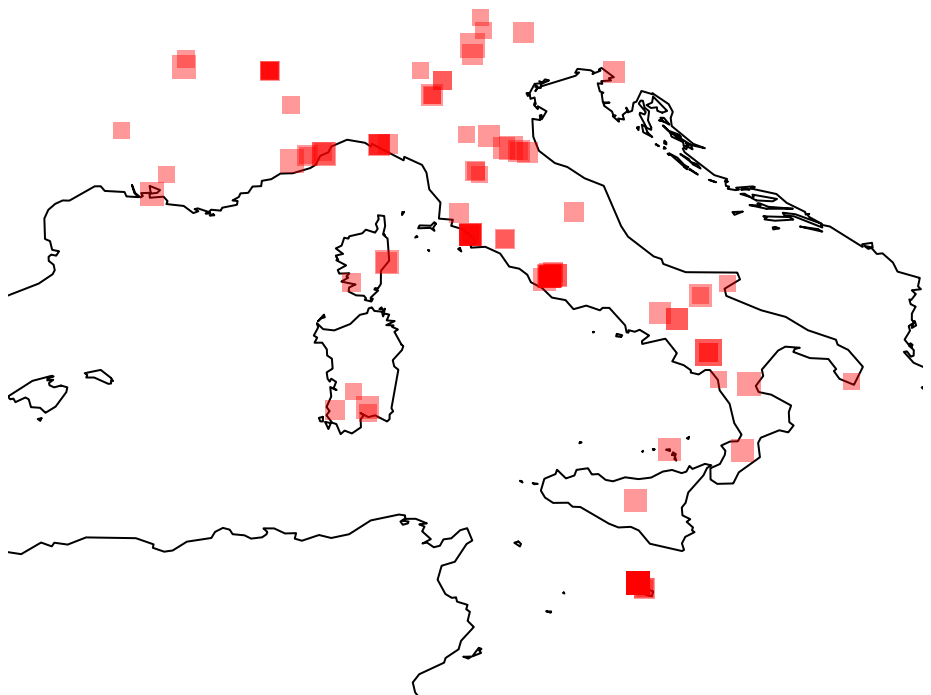



2685 cal. BC

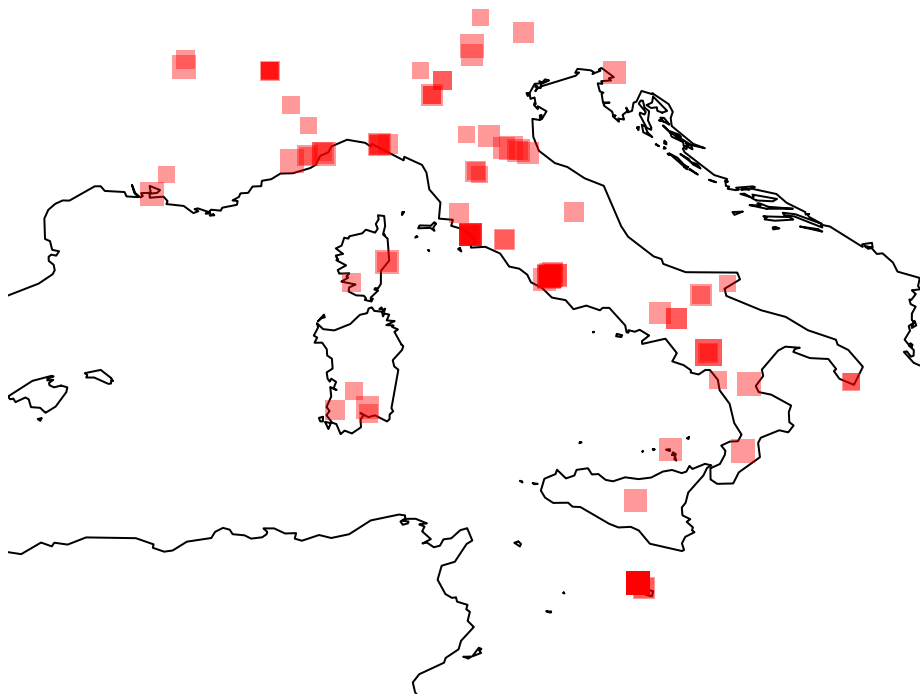



2675 cal. BC

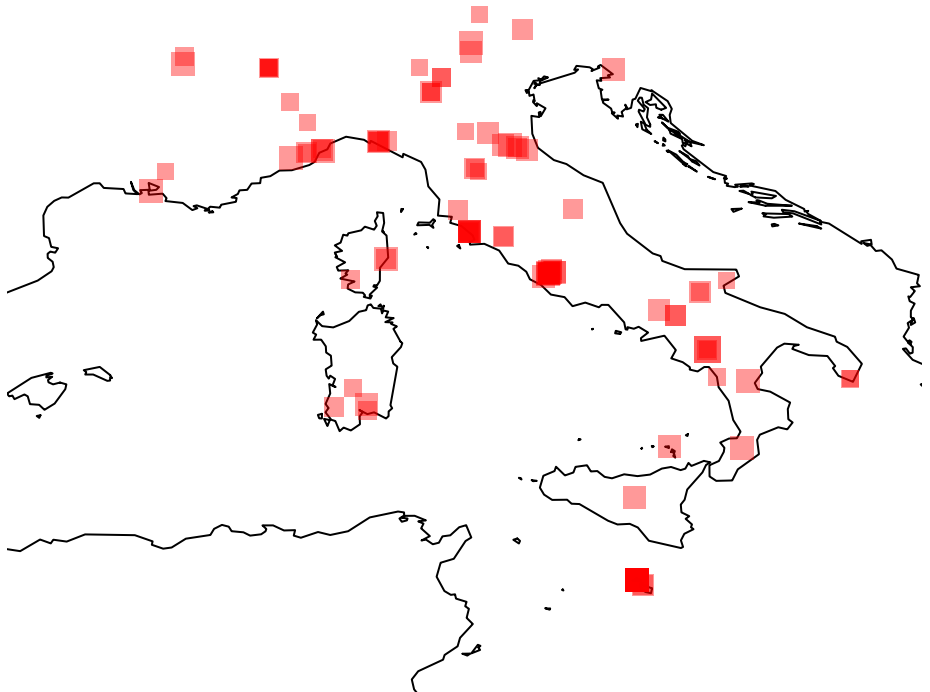

2670 cal. BC

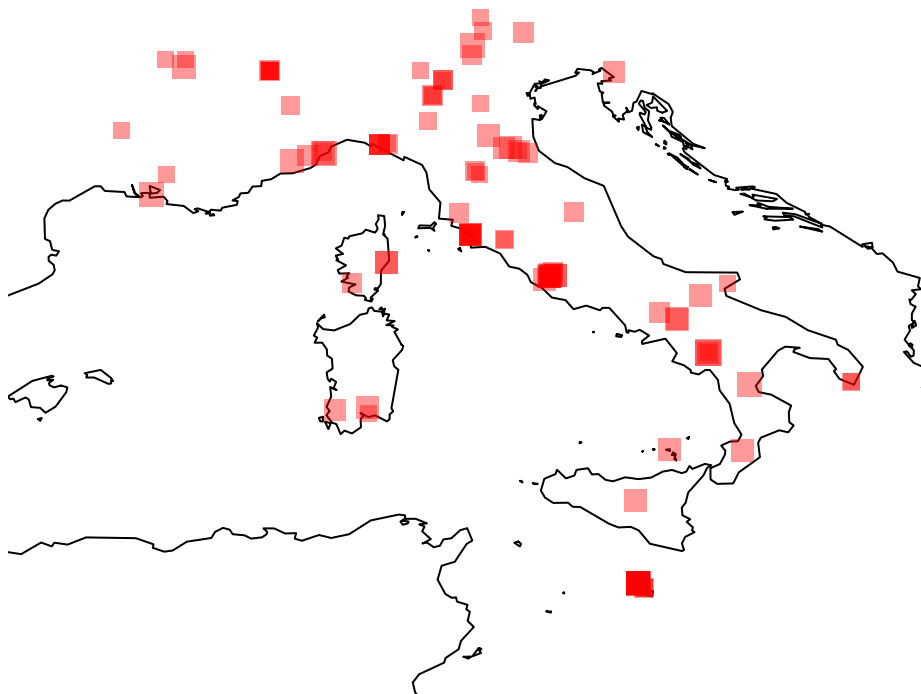





2655 cal. BC

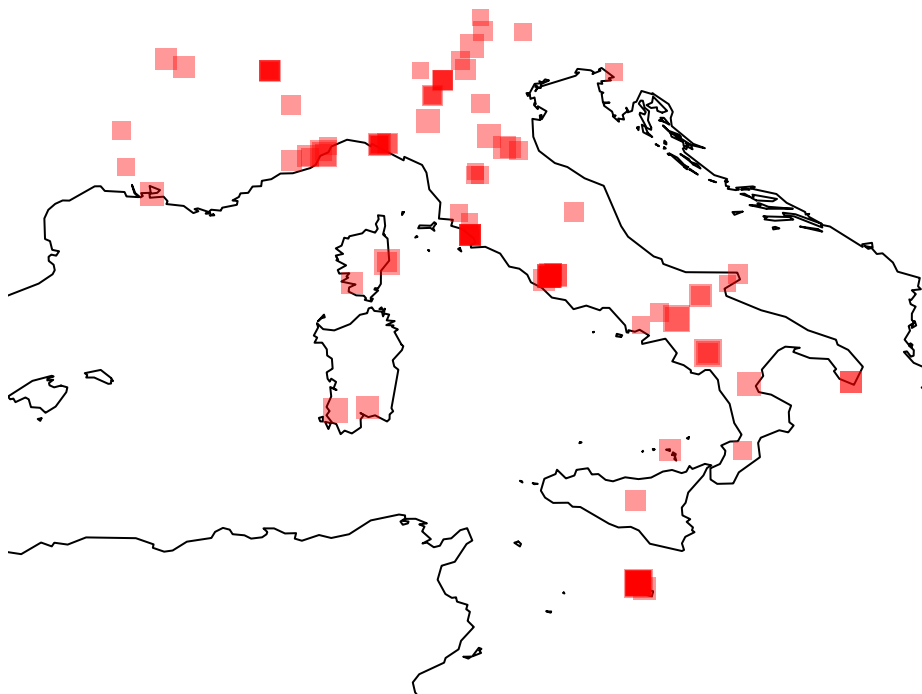

2650 cal. BC

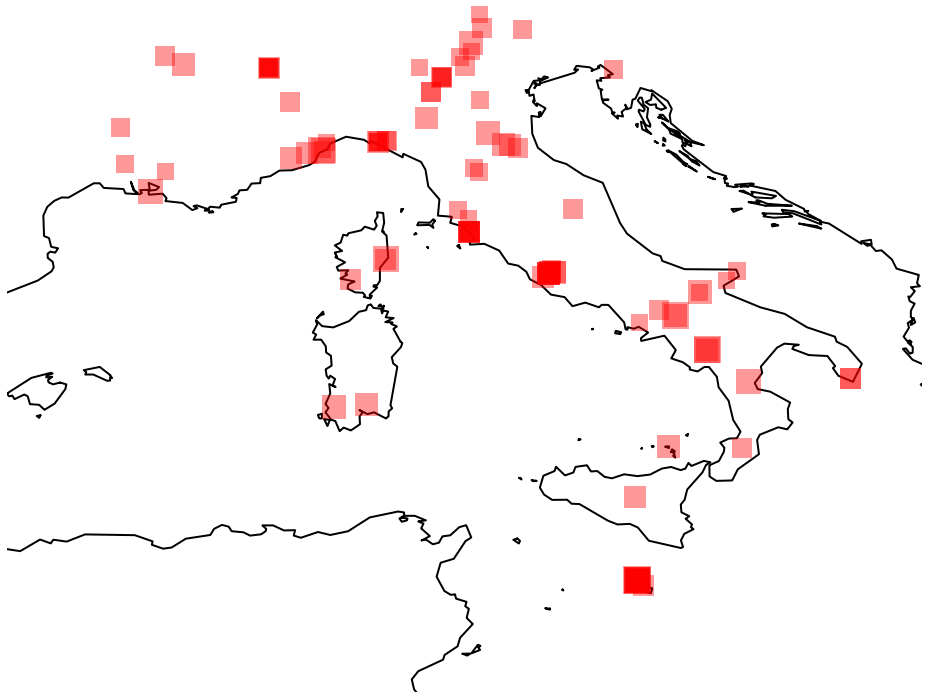



2645 cal. BC

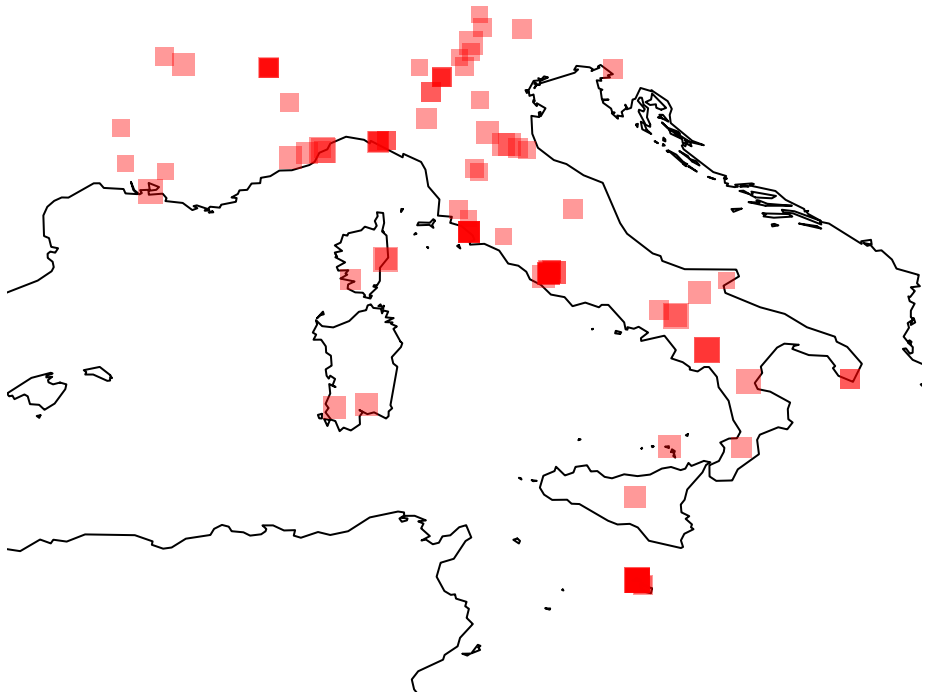

2640 cal. BC

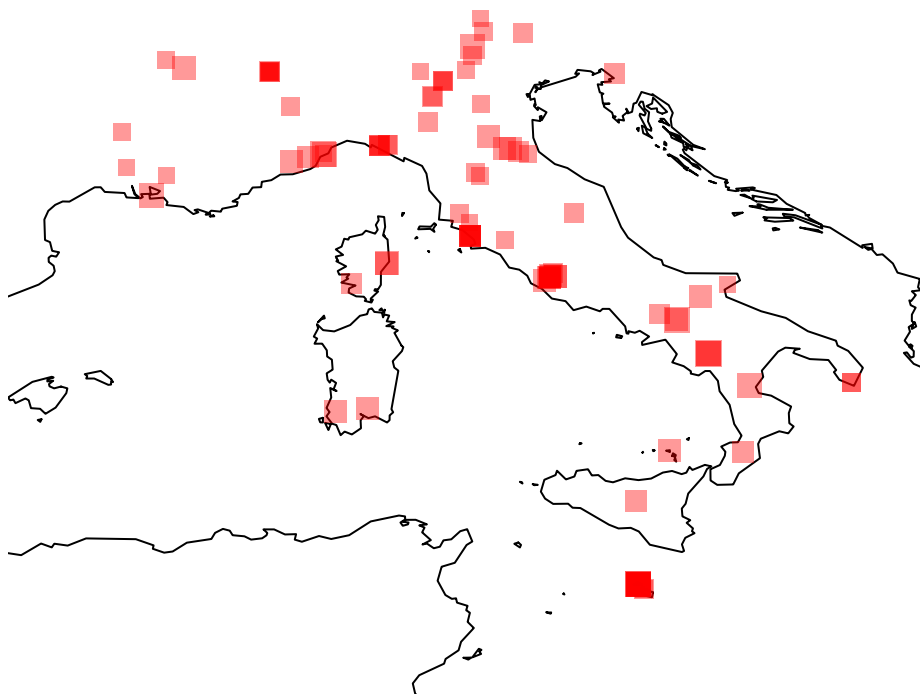

2635 cal. BC

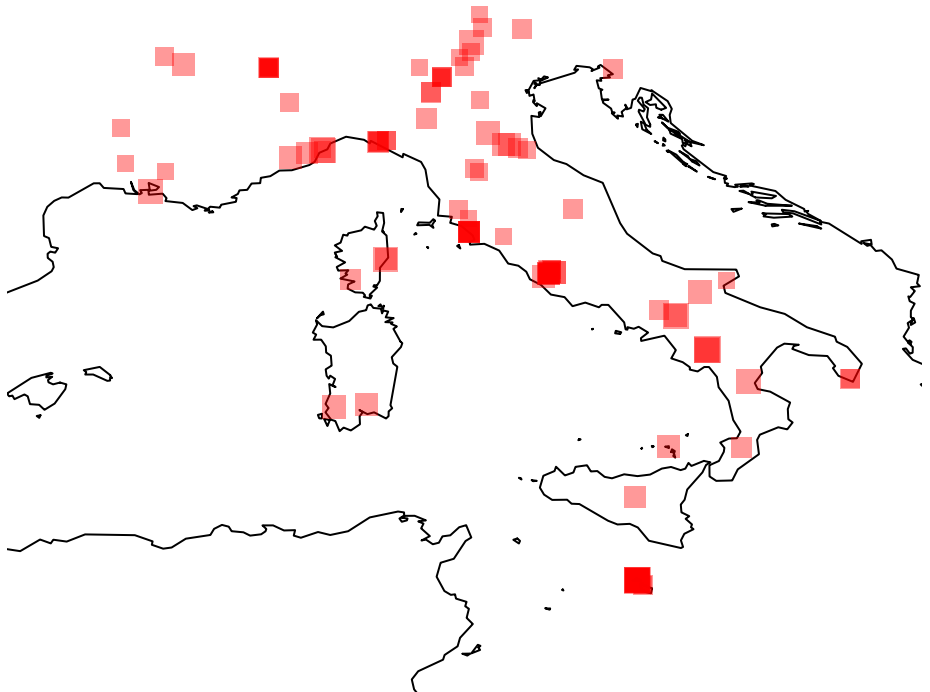

2630 cal. BC

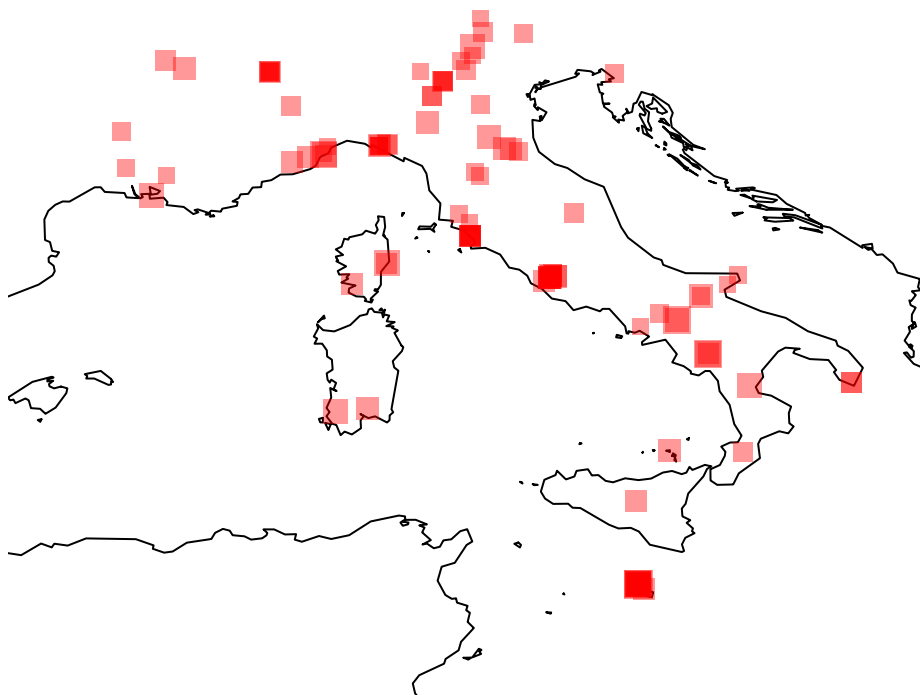



2620 cal. BC

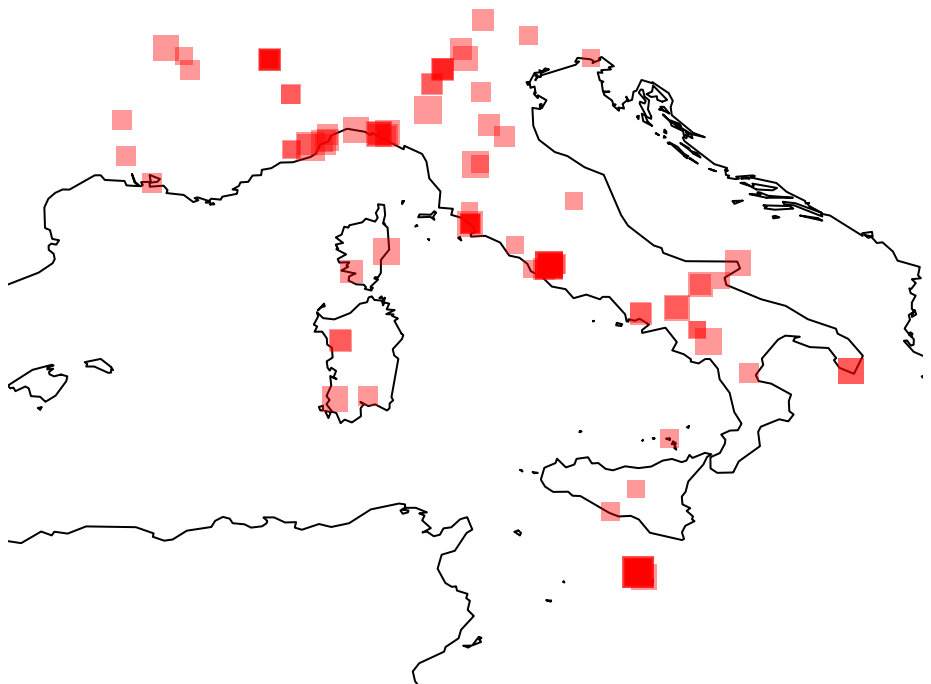

2615 cal. BC

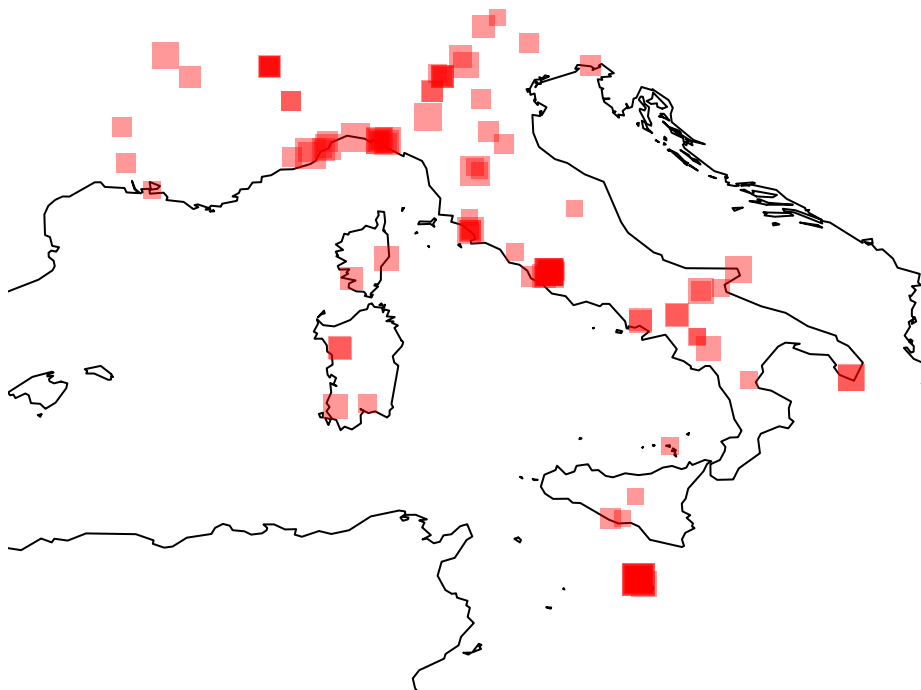

2610 cal. BC

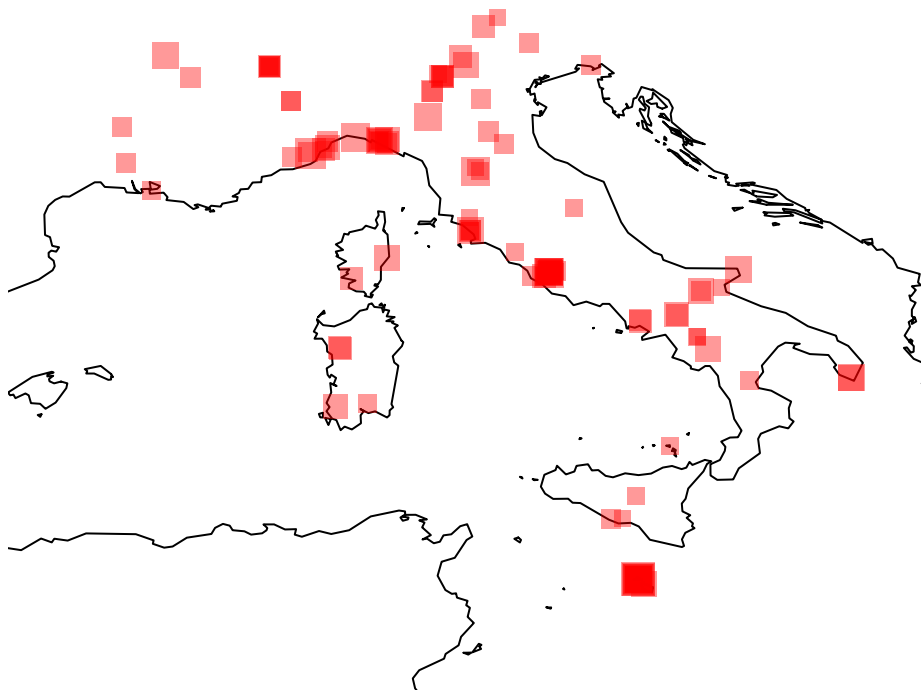









2590 cal. BC

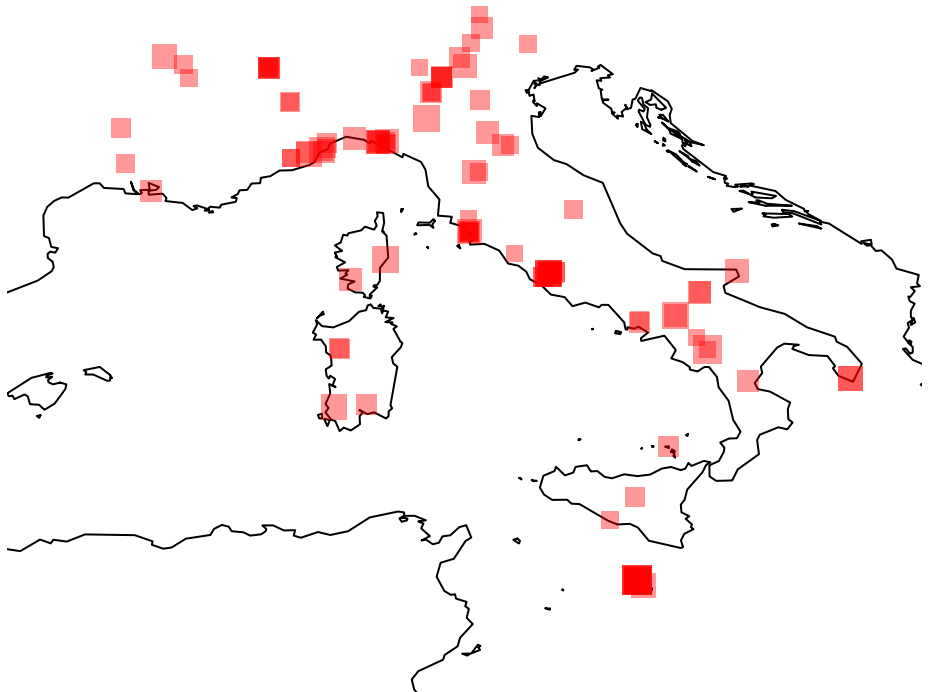



2580 cal. BC

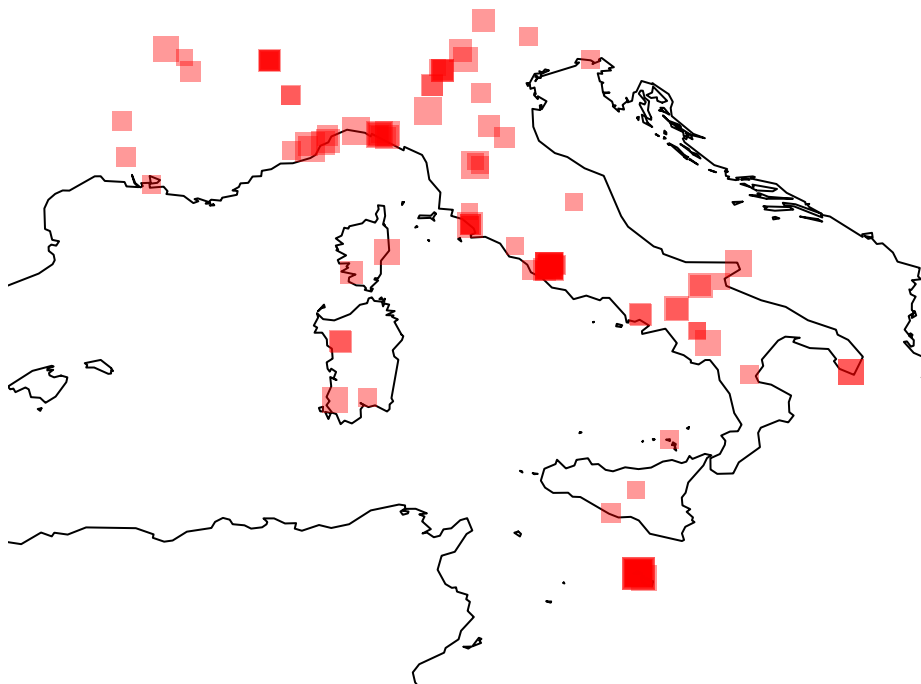

2575 cal. BC

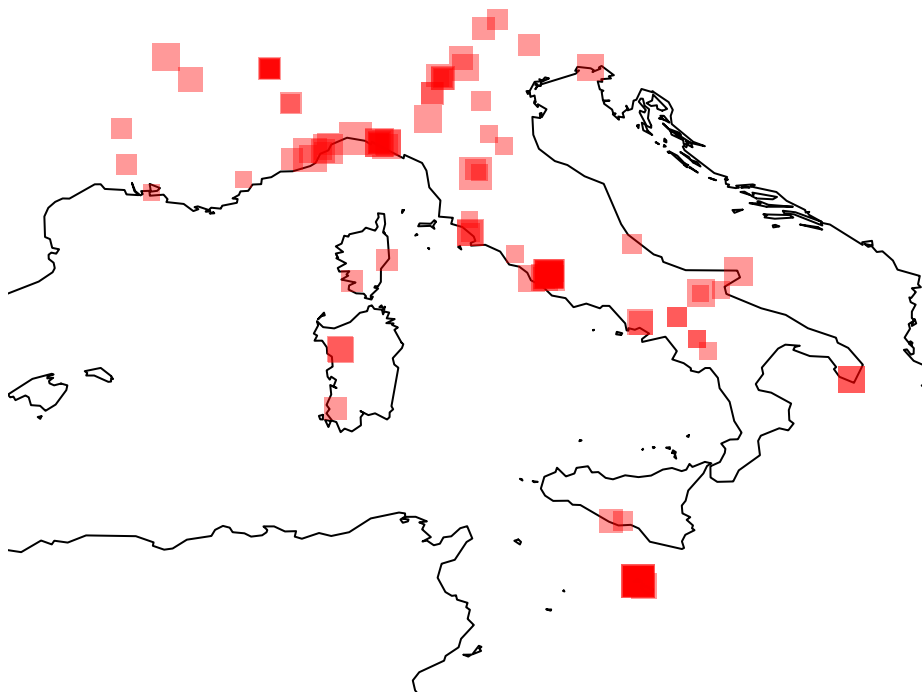

2570 cal. BC

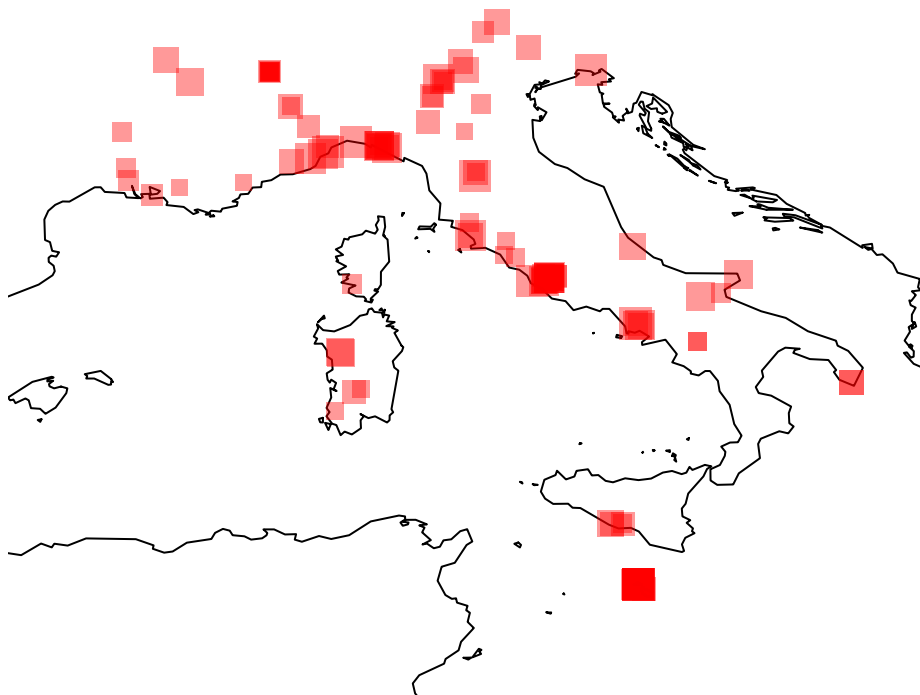



2565 cal. BC

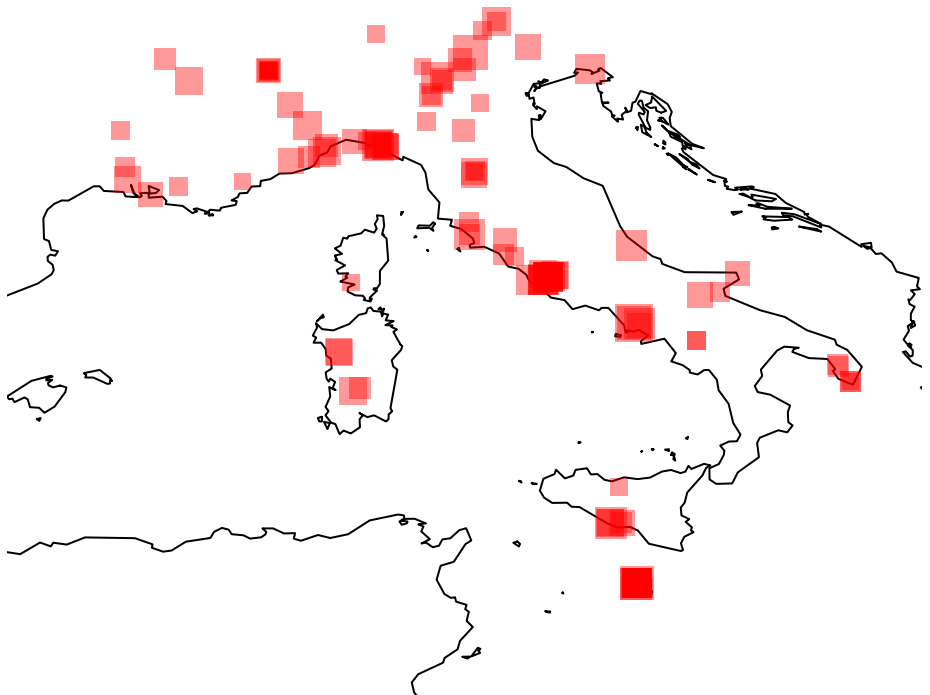

2560 cal. BC

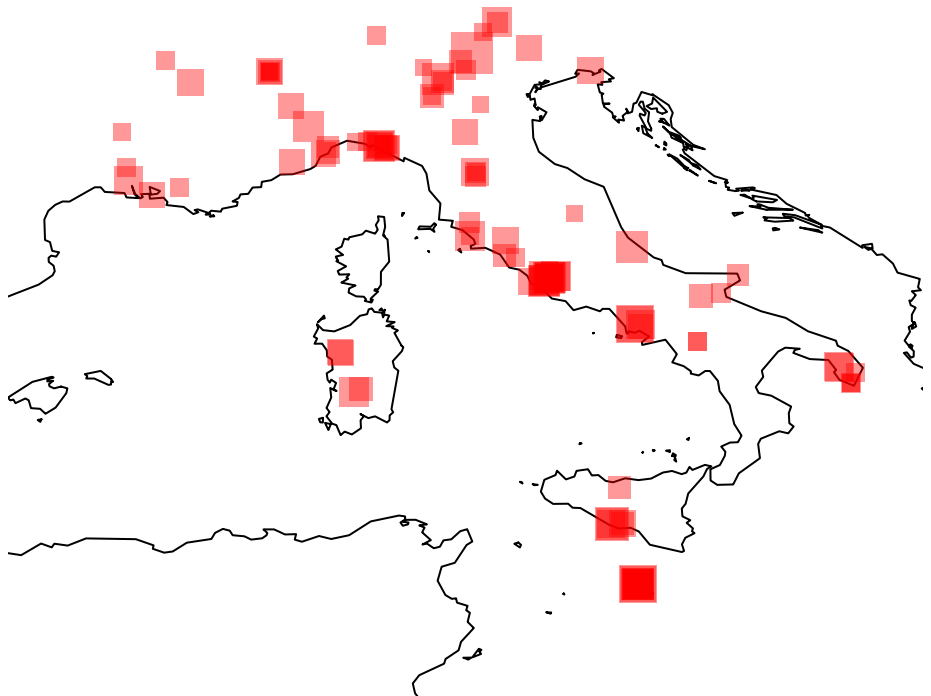

2555 cal. BC

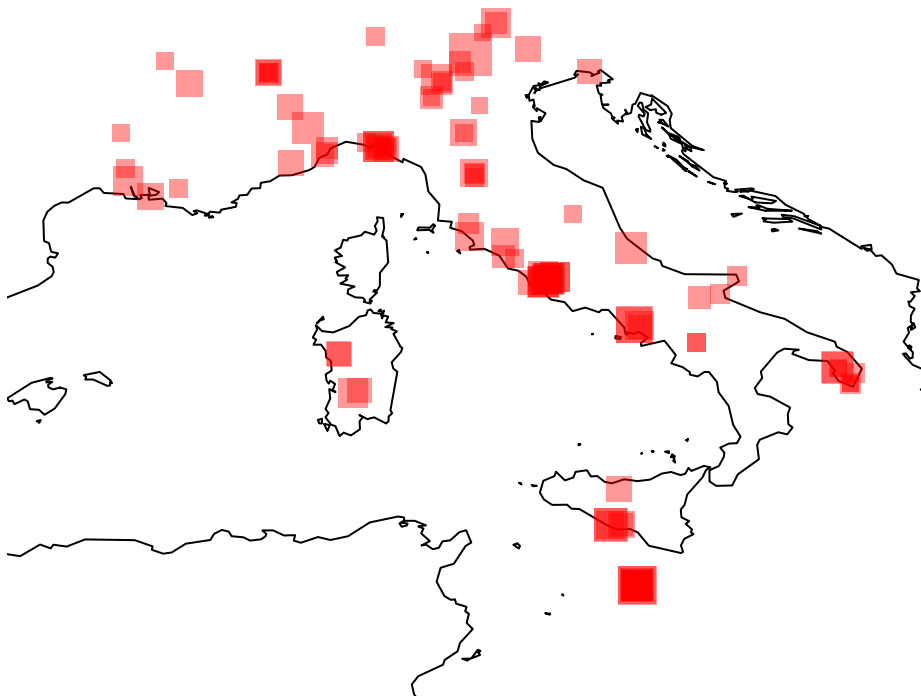

2550 cal. BC

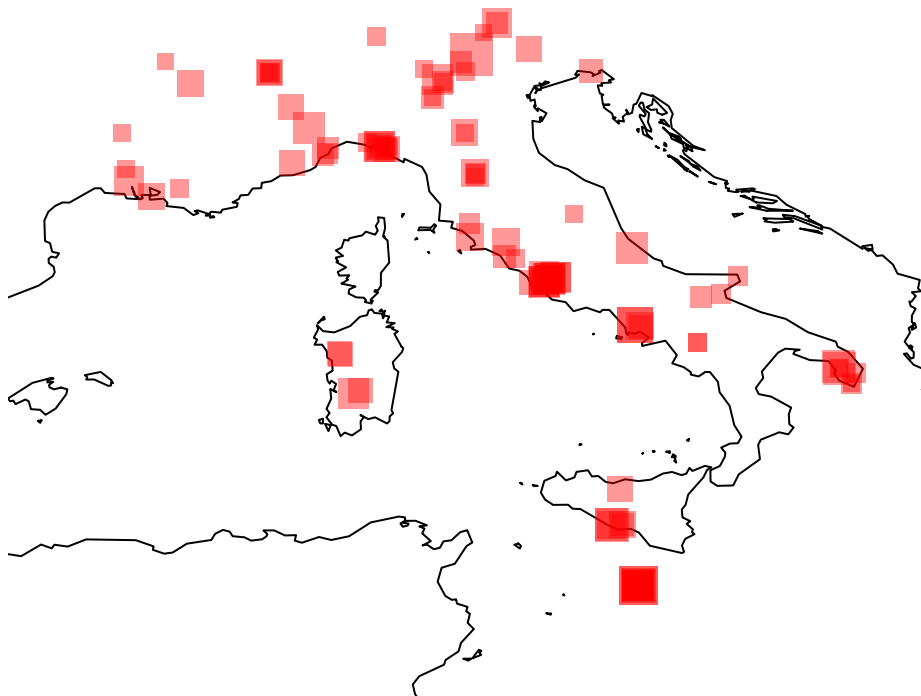

2545 cal. BC

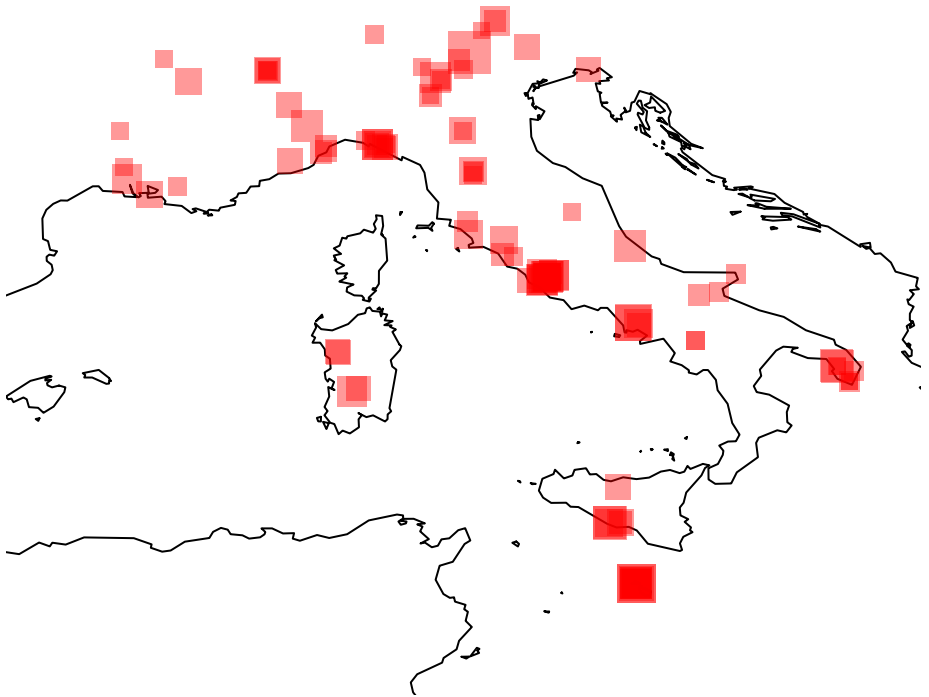

2540 cal. BC

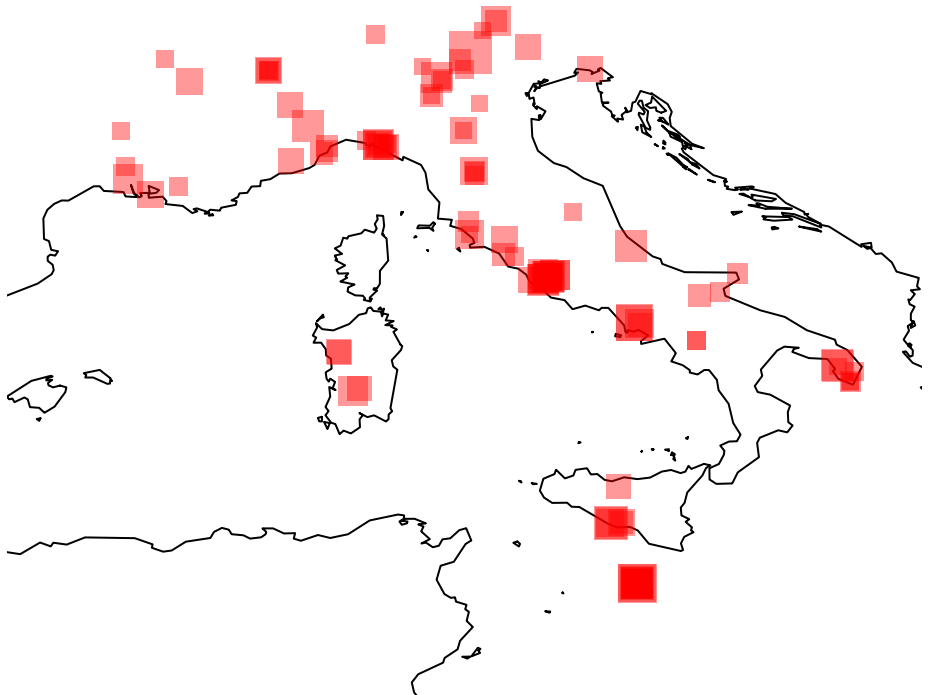

2535 cal. BC

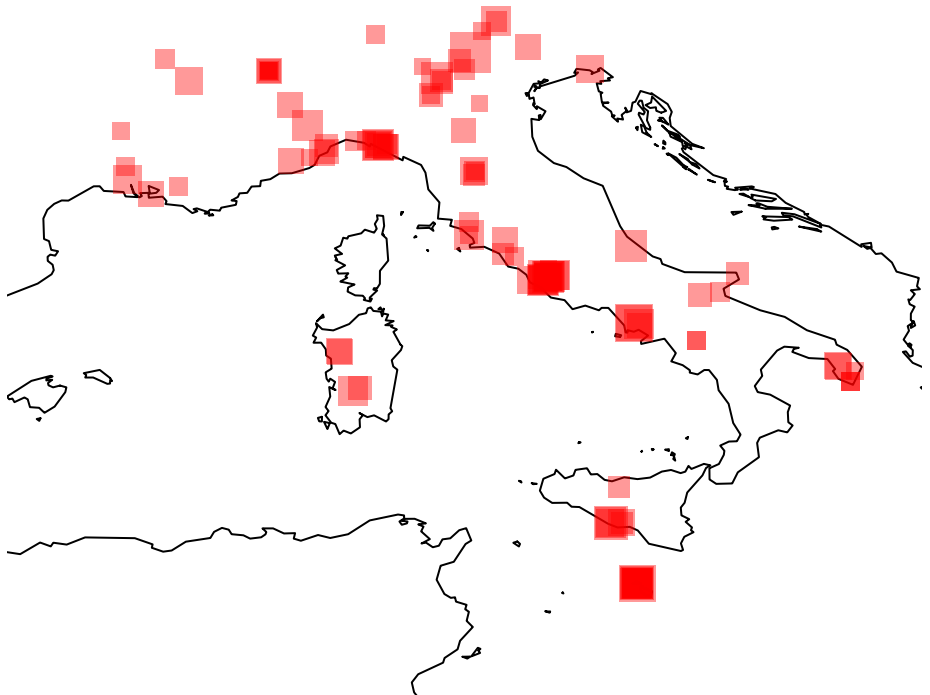

2530 cal. BC

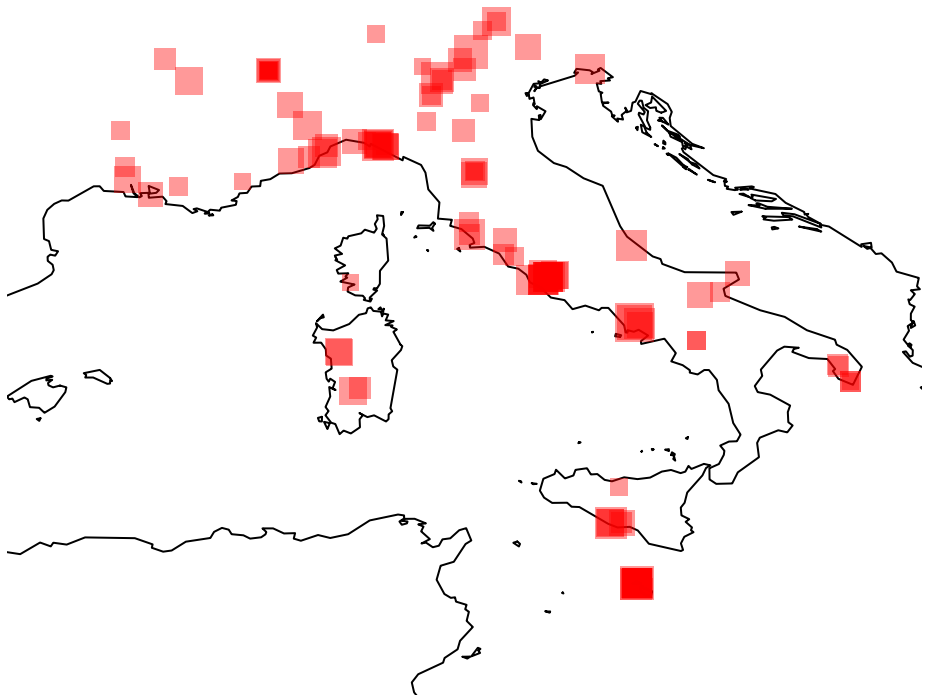



2525 cal. BC

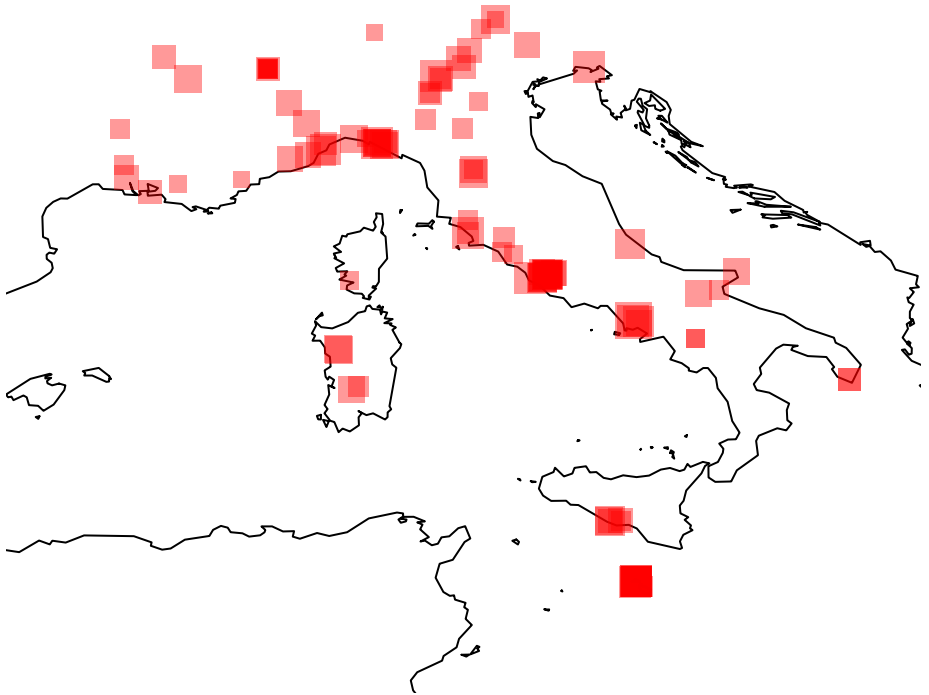

2520 cal. BC

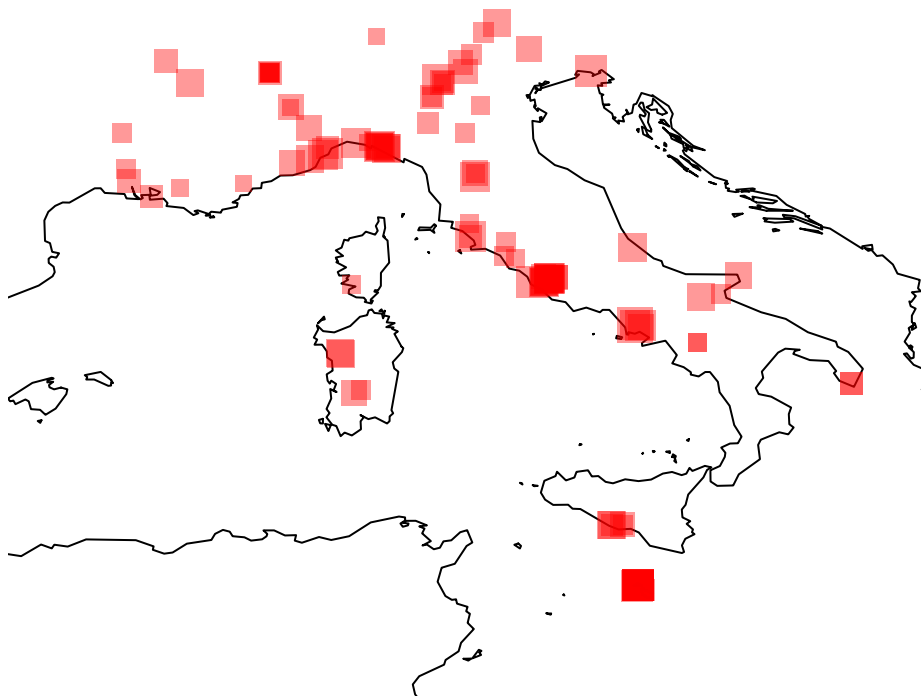

2515 cal. BC

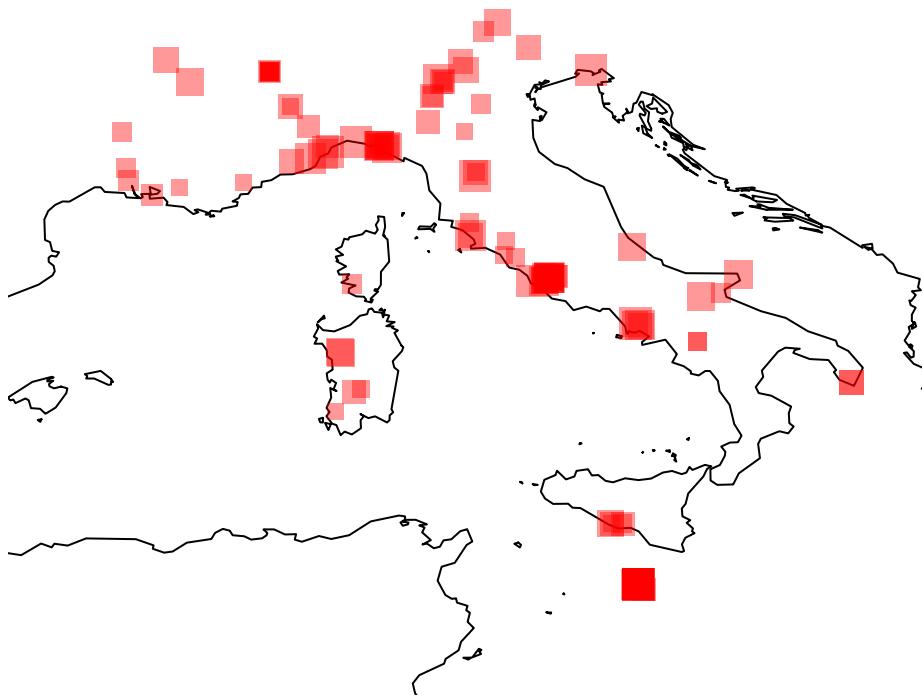

2510 cal. BC

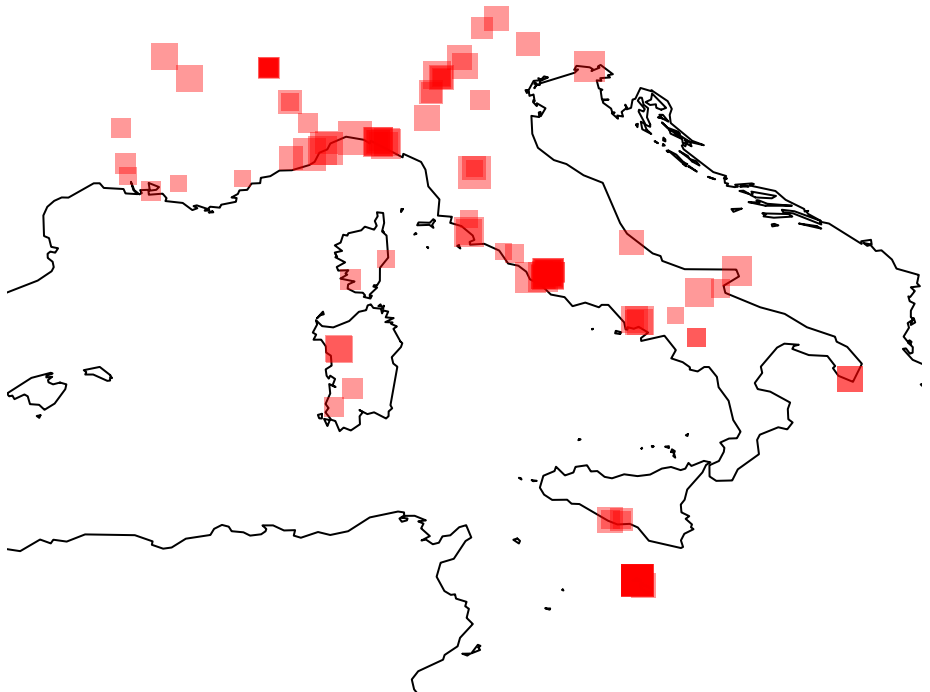

2505 cal. BC

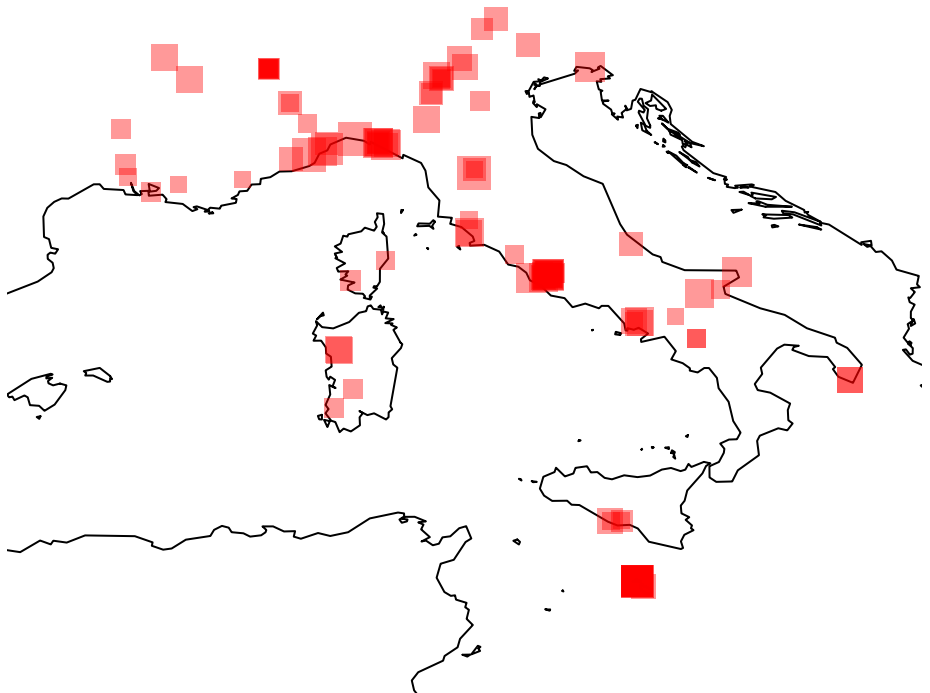

2500 cal. BC

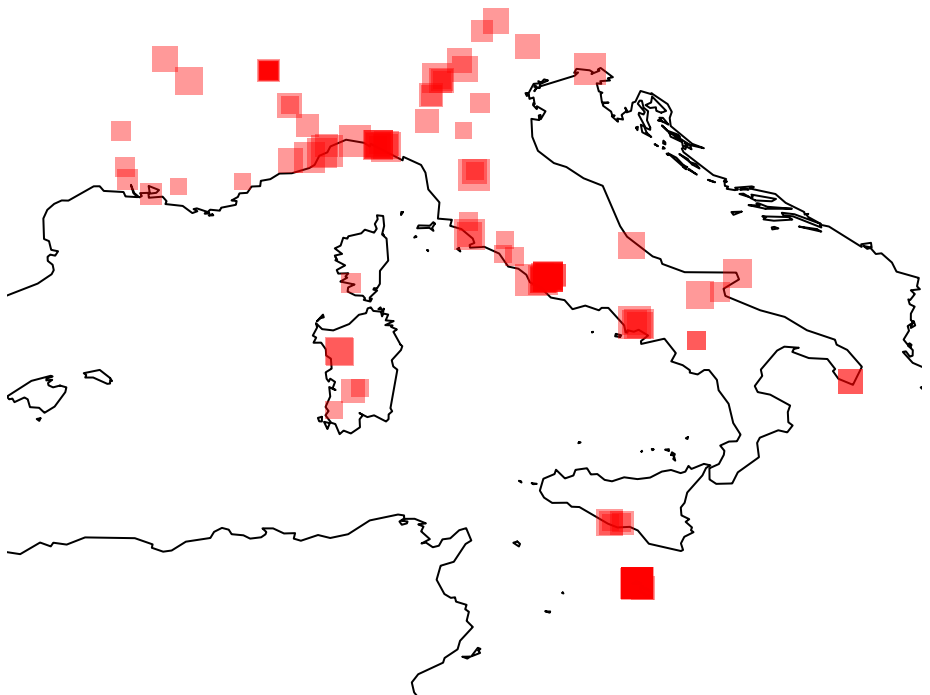

2495 cal. BC

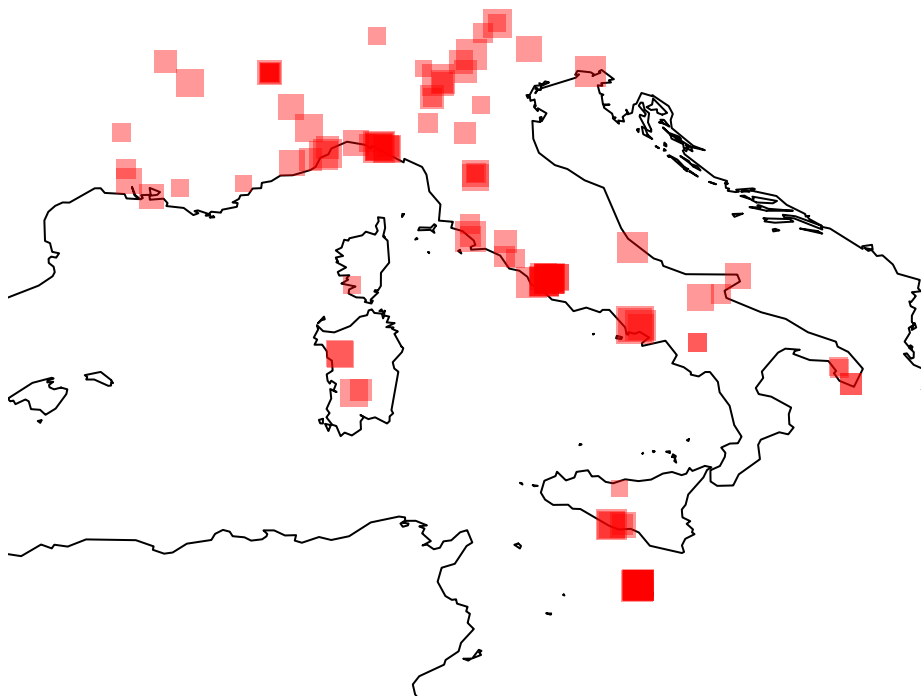

2490 cal. BC

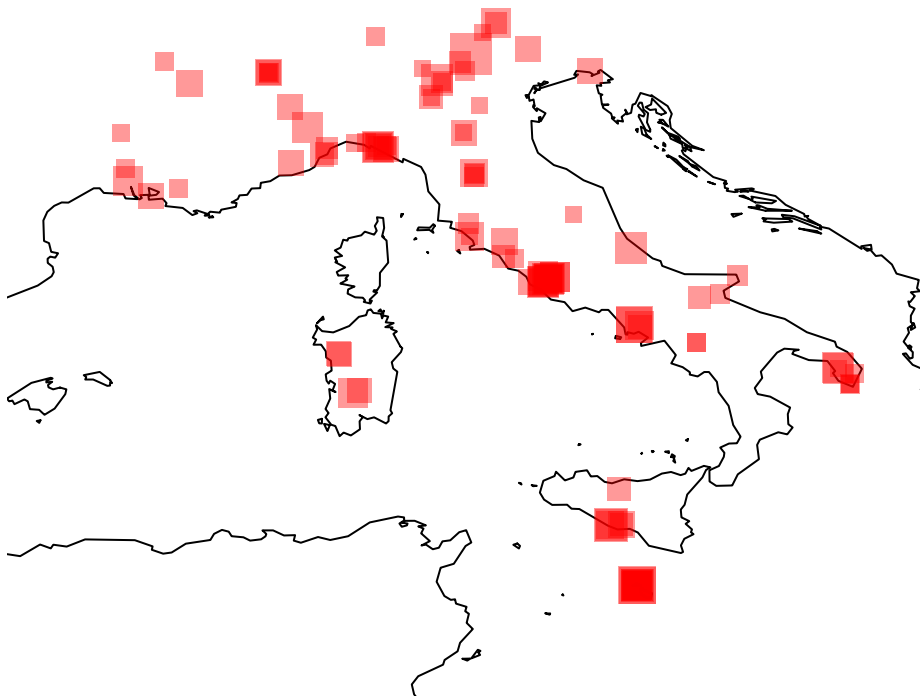



2485 cal. BC

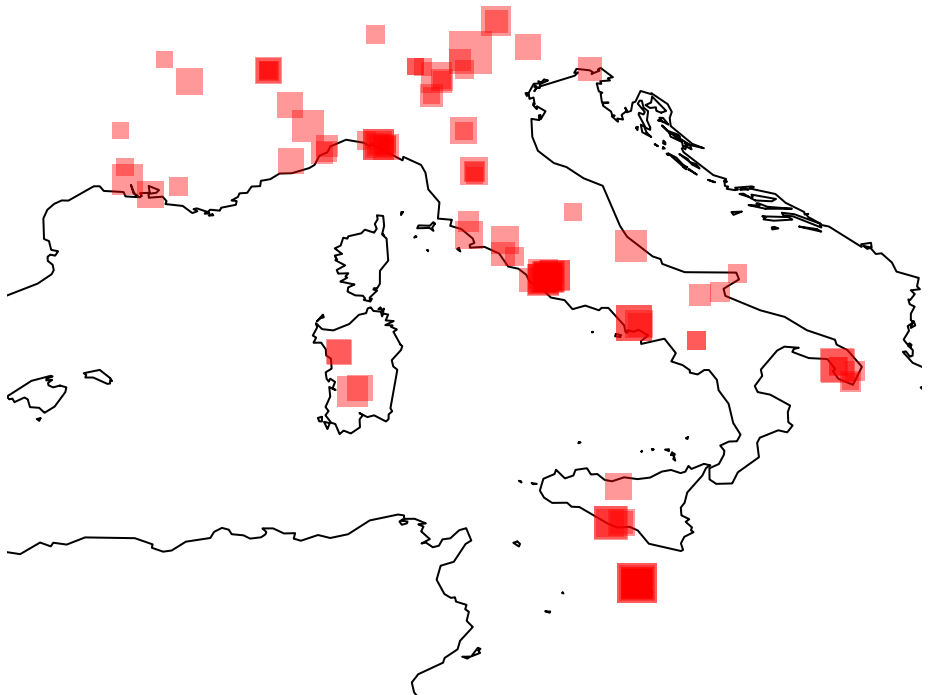

2480 cal. BC

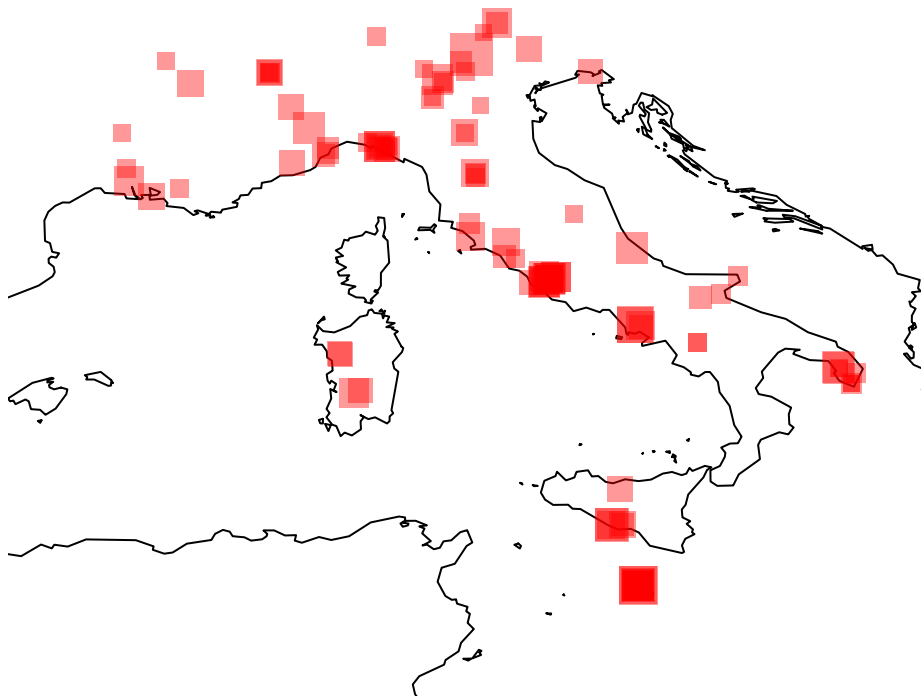

2475 cal. BC

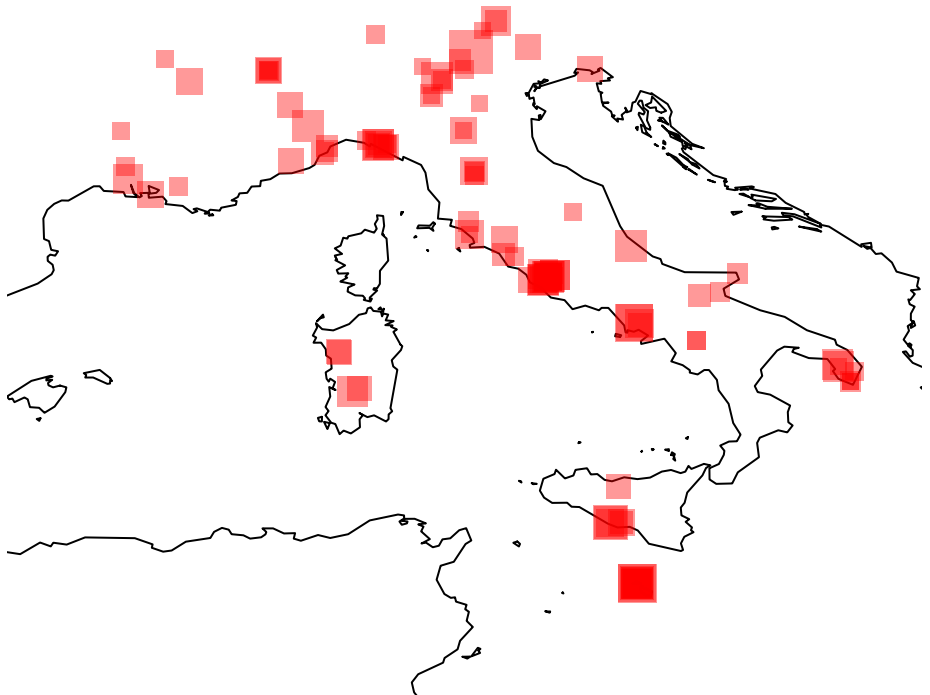





2460 cal. BC

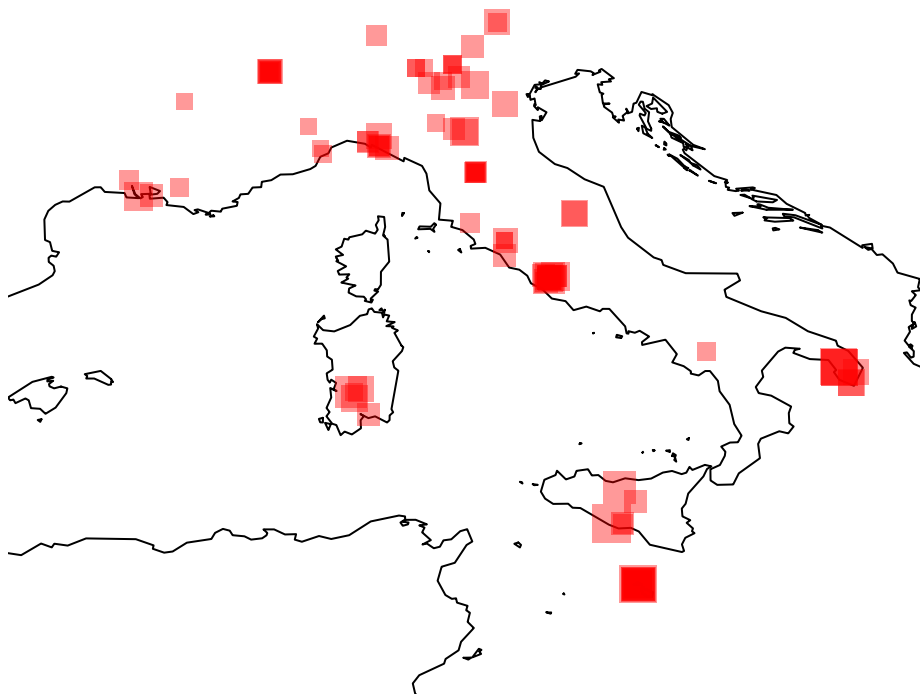

2455 cal. BC

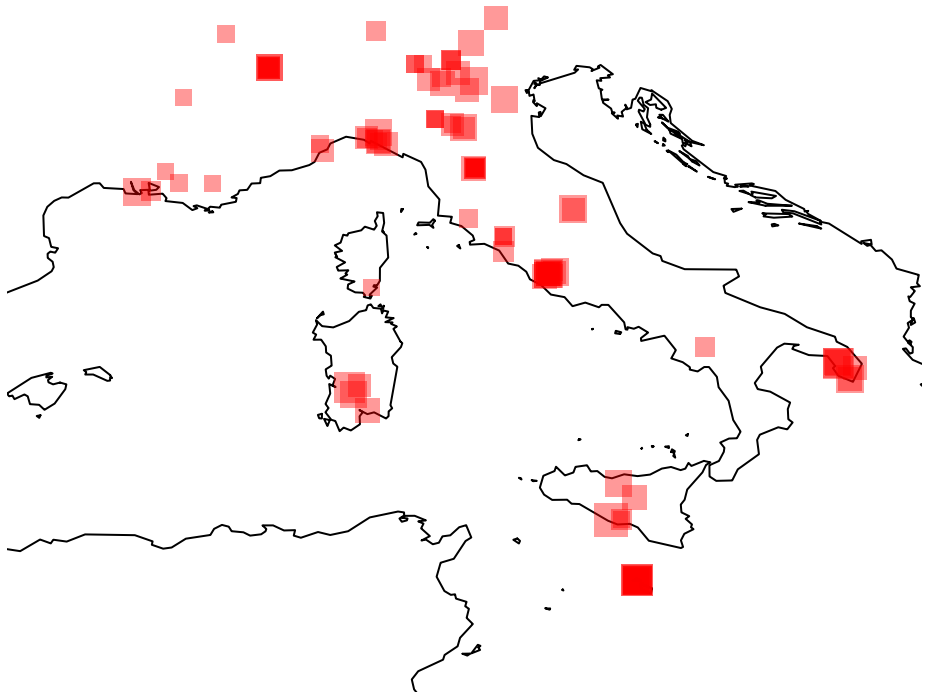

2450 cal. BC

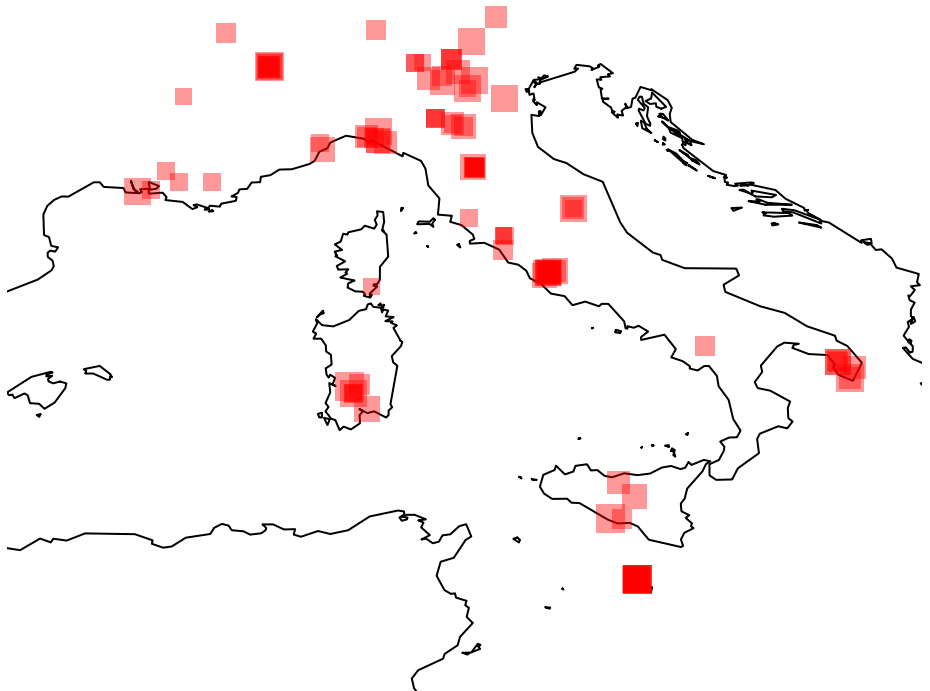



2445 cal. BC

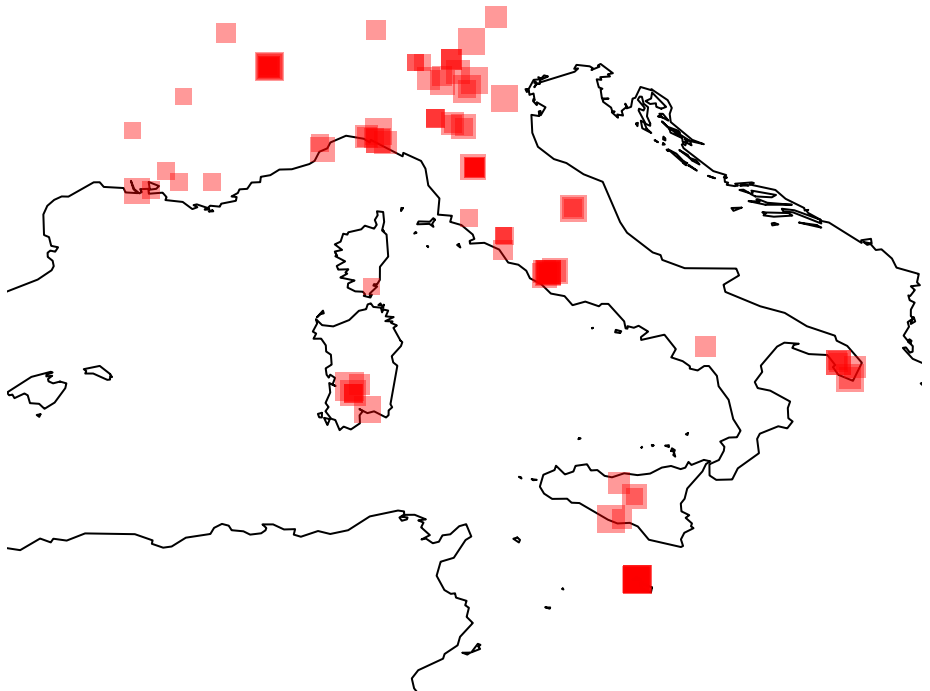

2440 cal. BC



2435 cal. BC

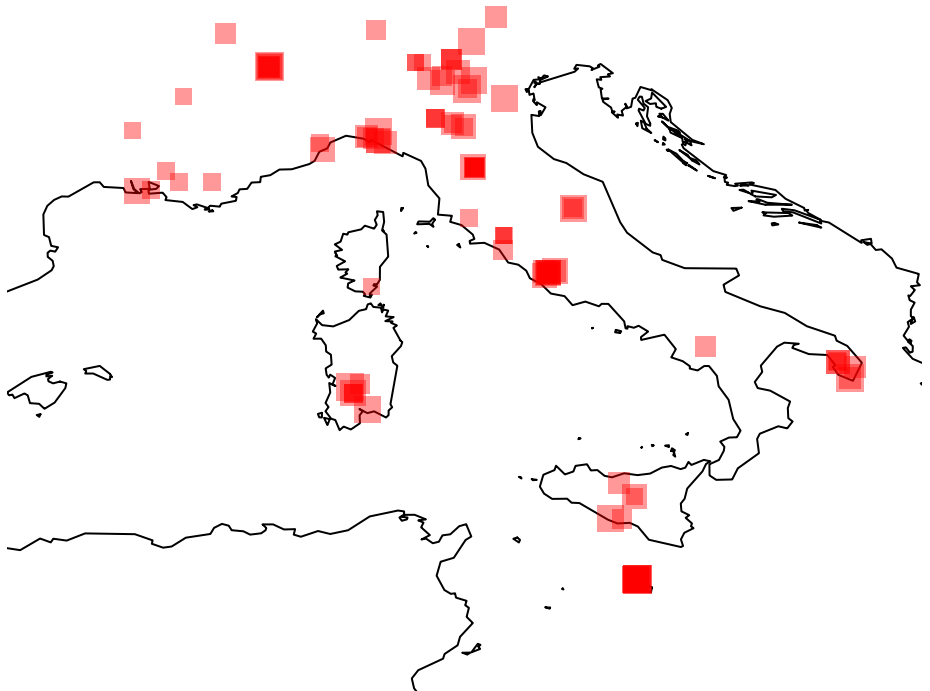

2430 cal. BC

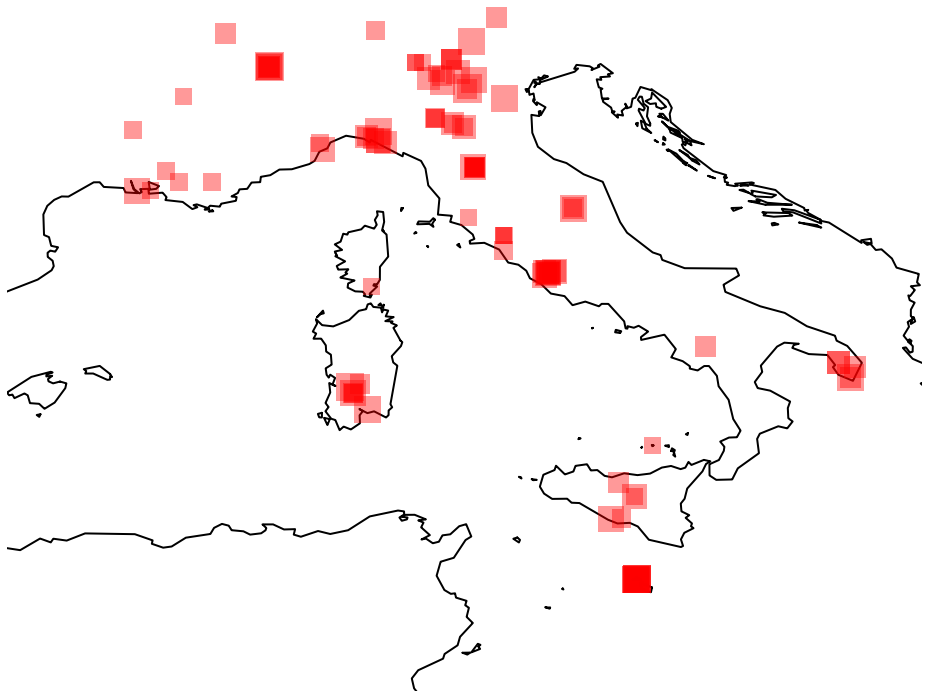

2425 cal. BC

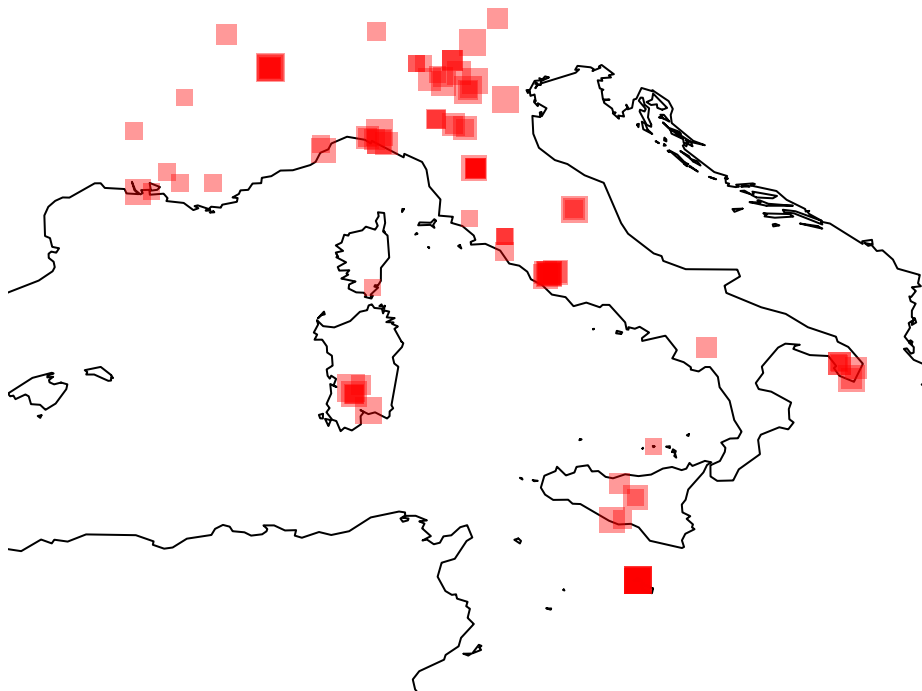

2420 cal. BC

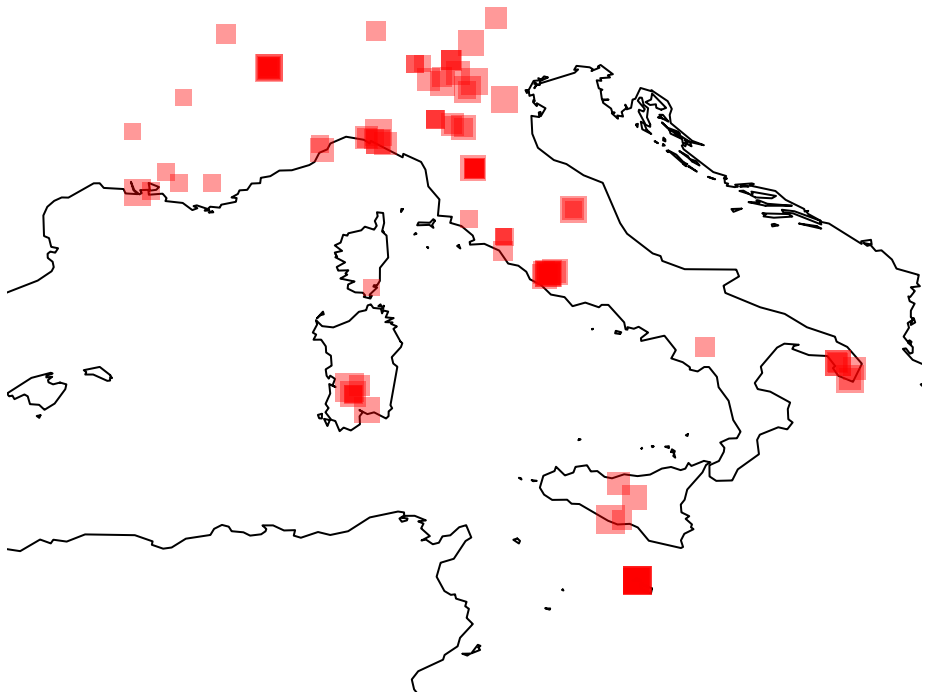

2415 cal. BC

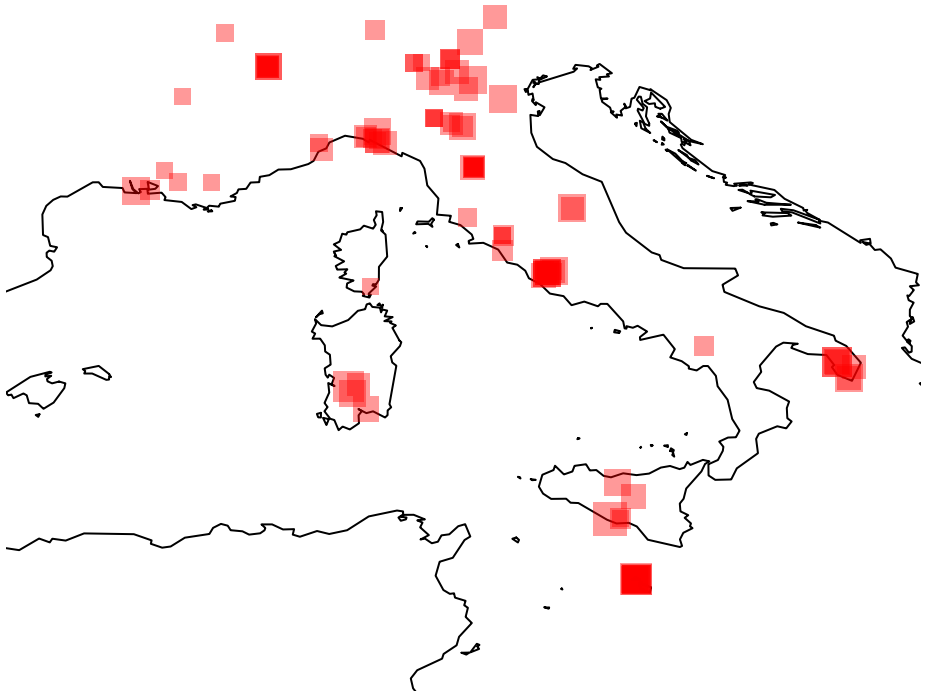

2410 cal. BC

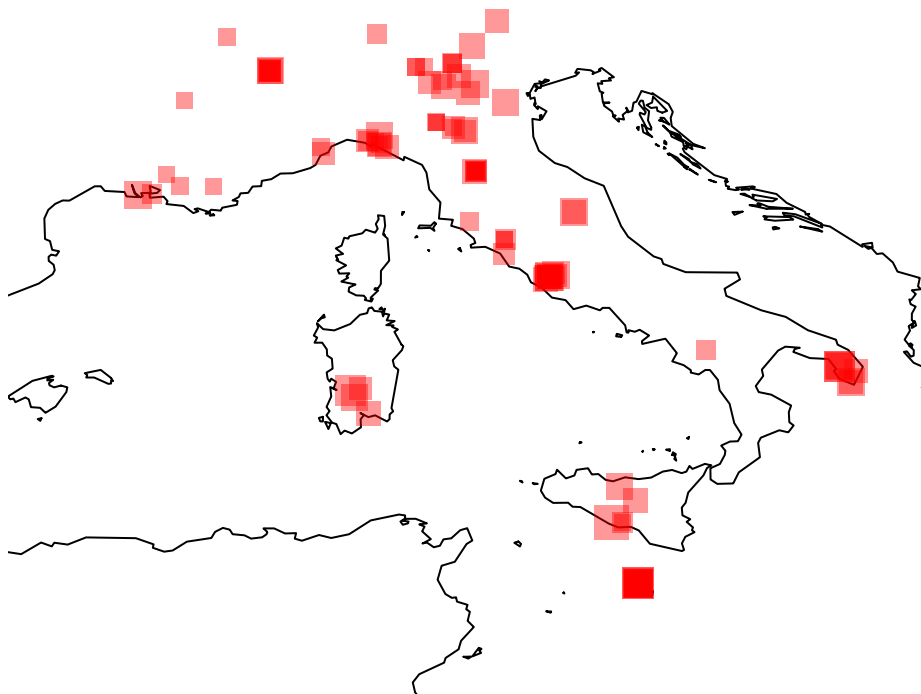



2405 cal. BC

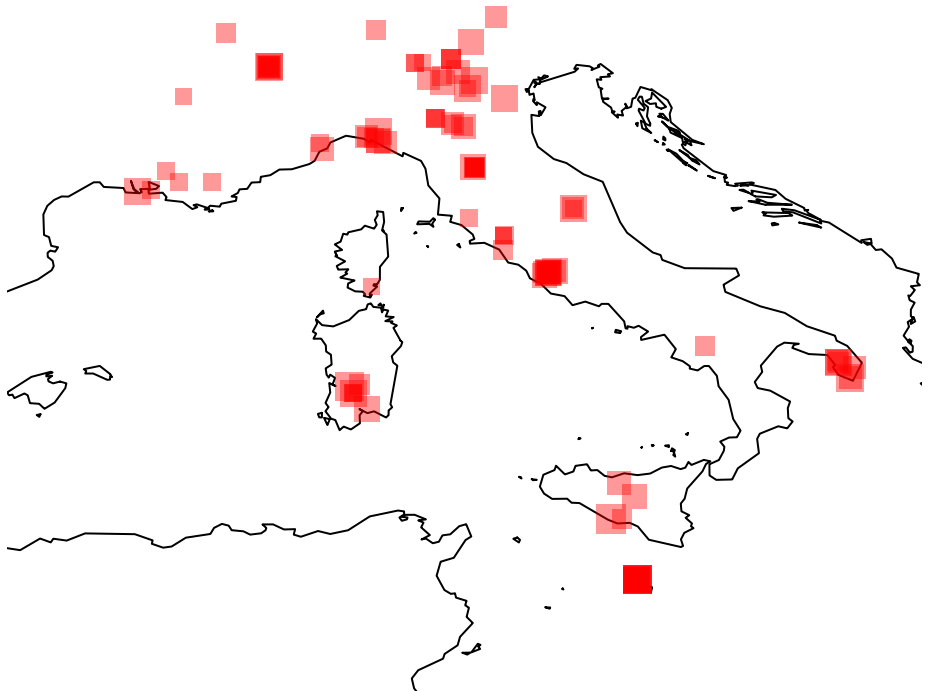

2400 cal. BC

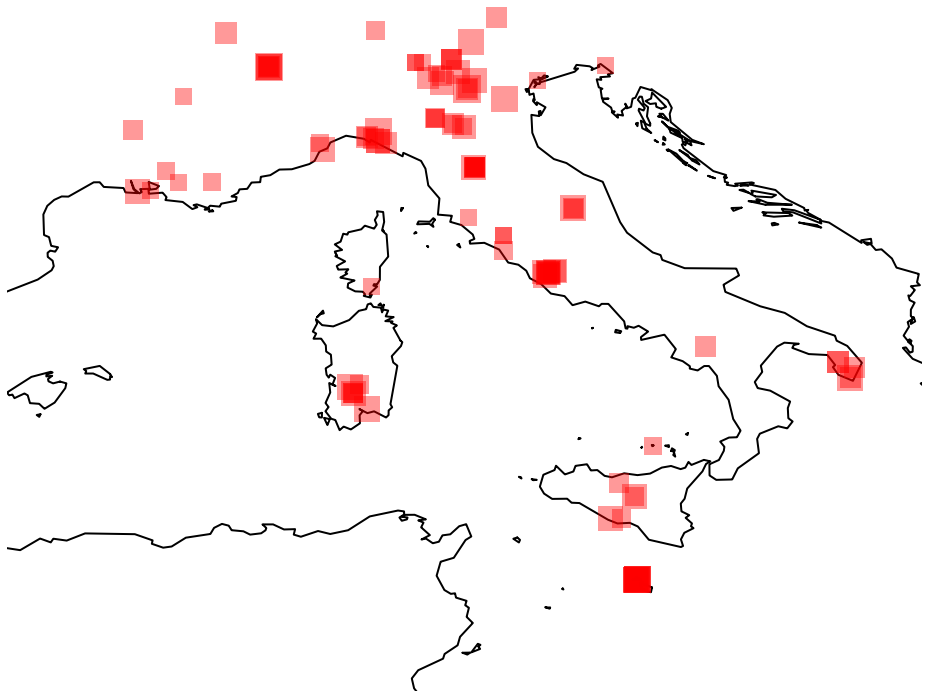

2395 cal. BC

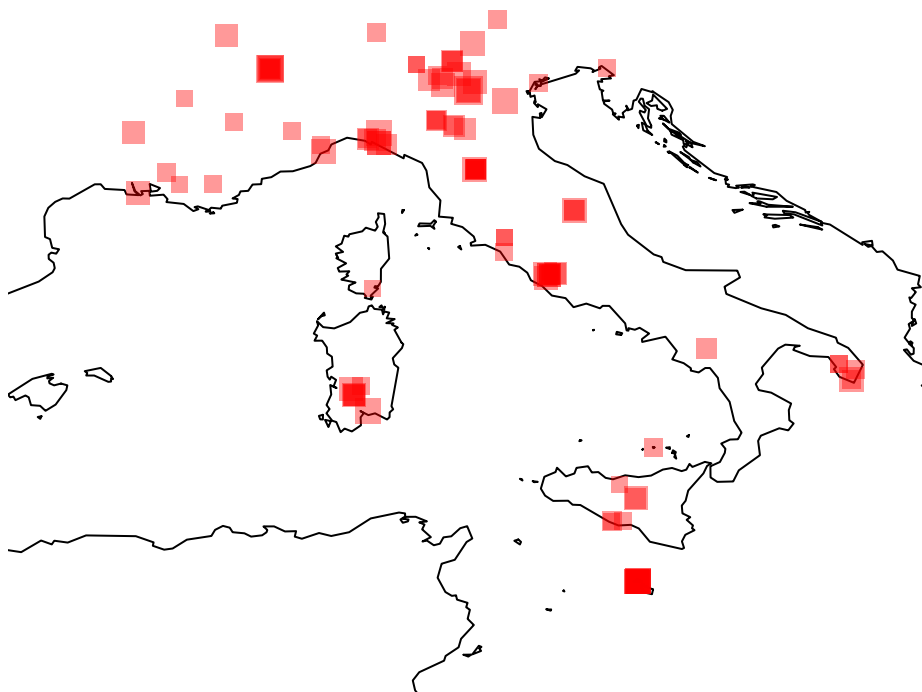

2390 cal. BC

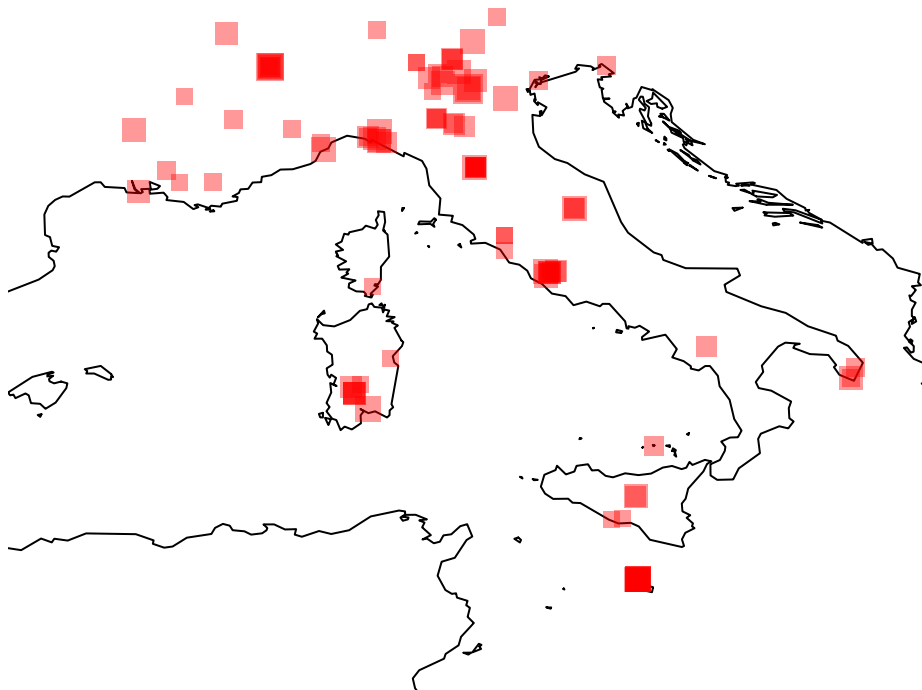

2385 cal. BC

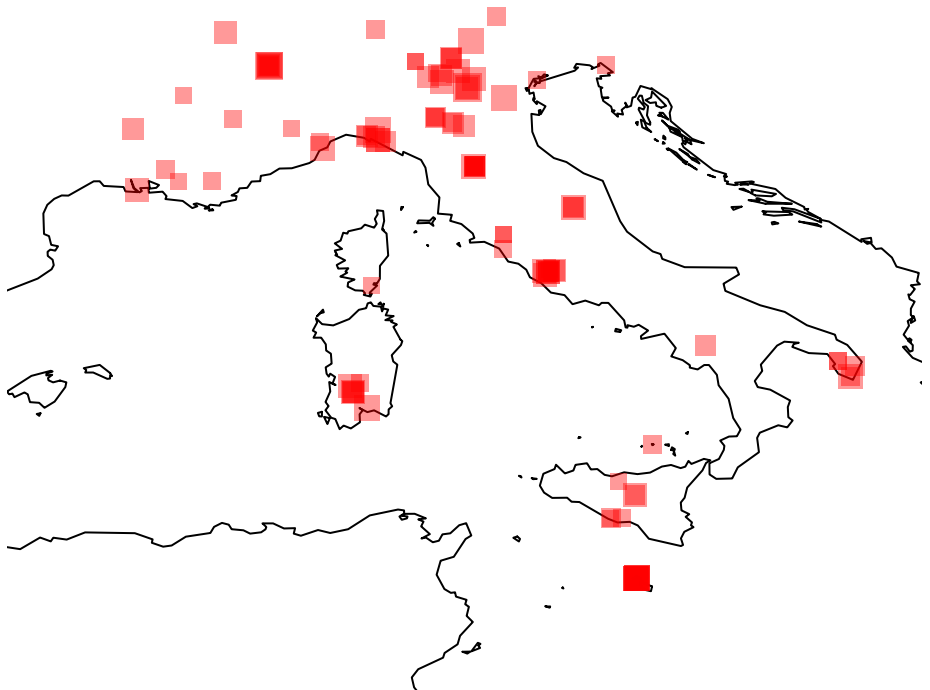

2380 cal. BC

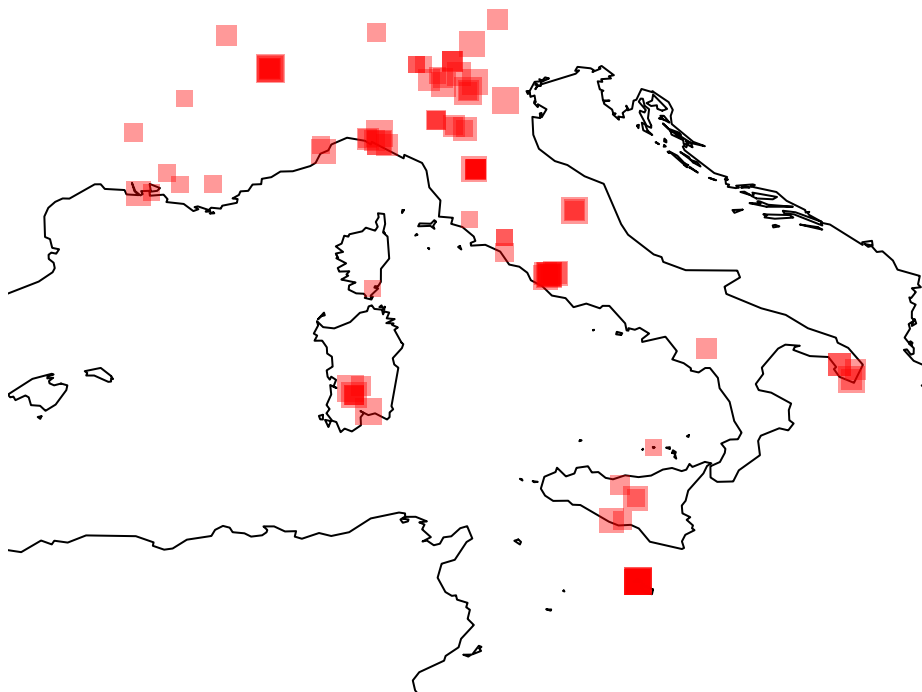

2375 cal. BC

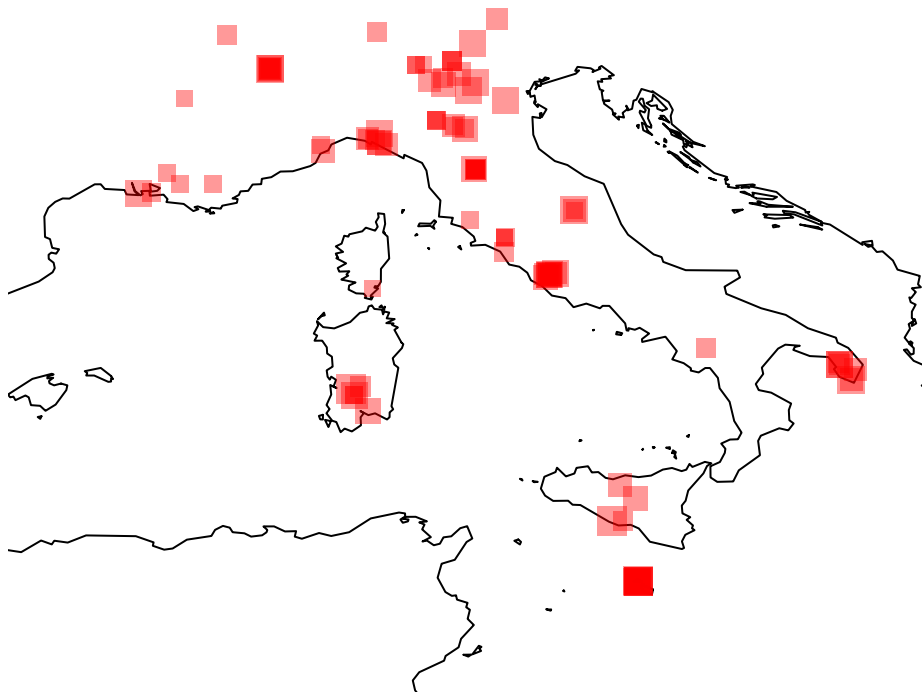

2370 cal. BC

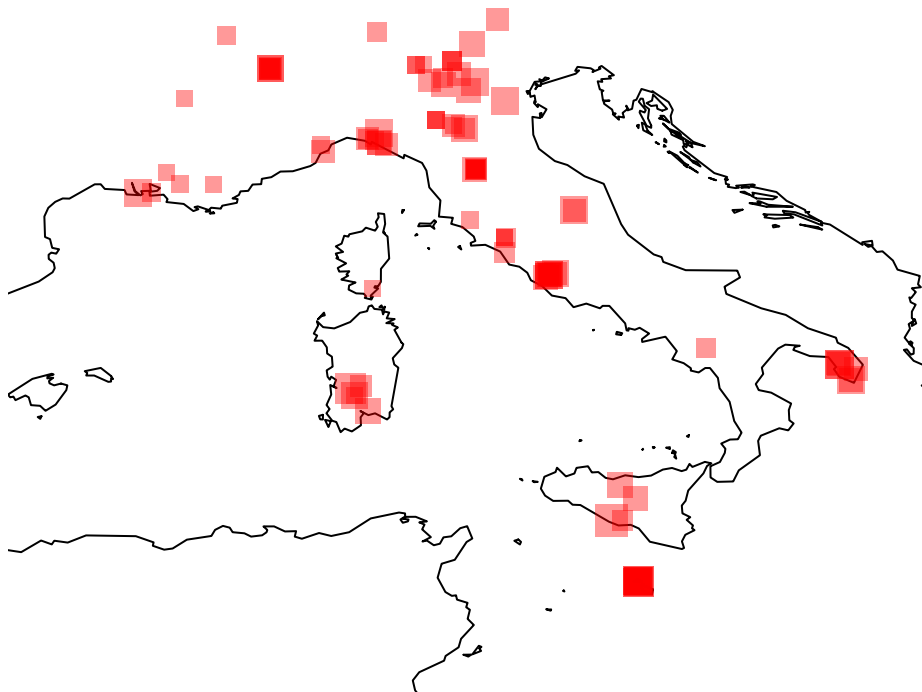



2365 cal. BC

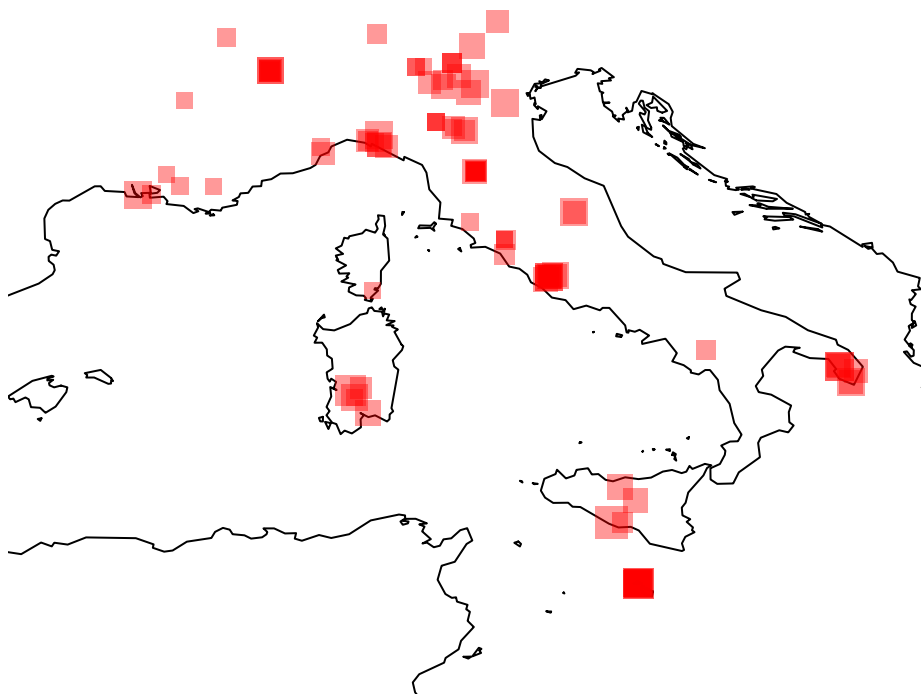

2360 cal. BC

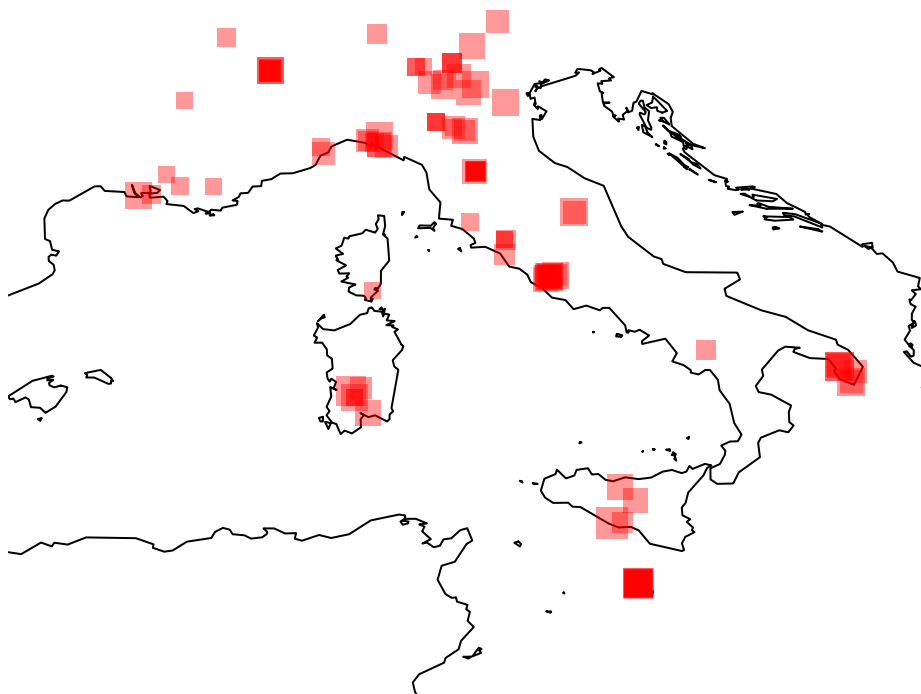

2355 cal. BC

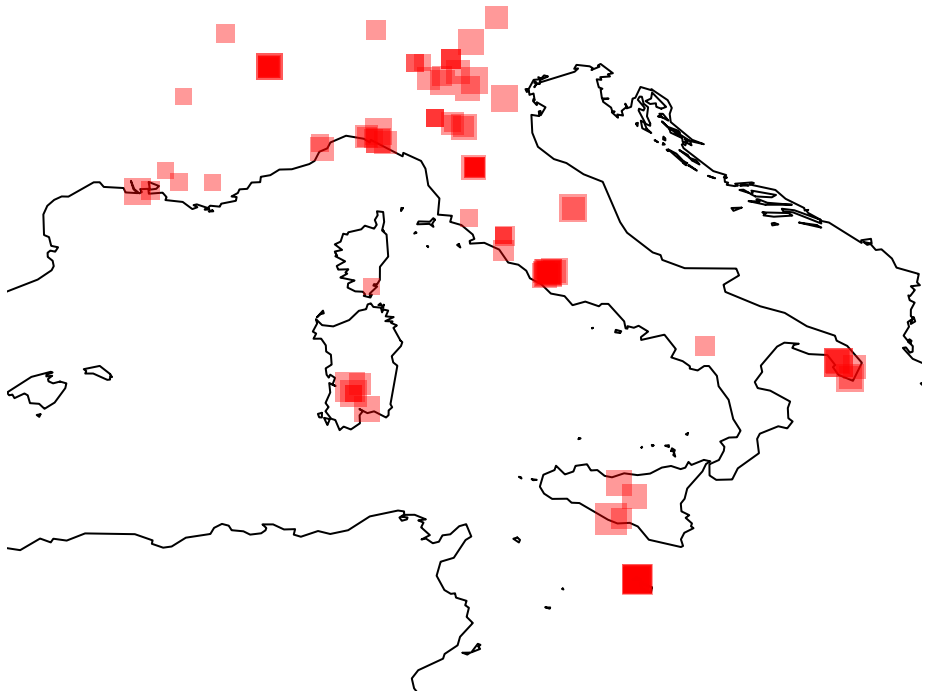



2345 cal. BC

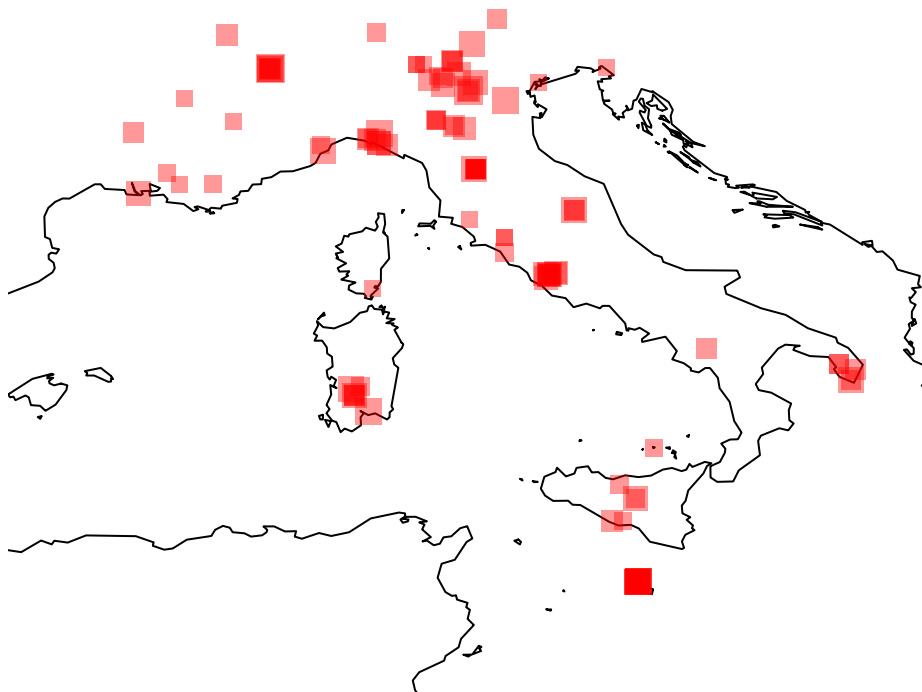

2340 cal. BC

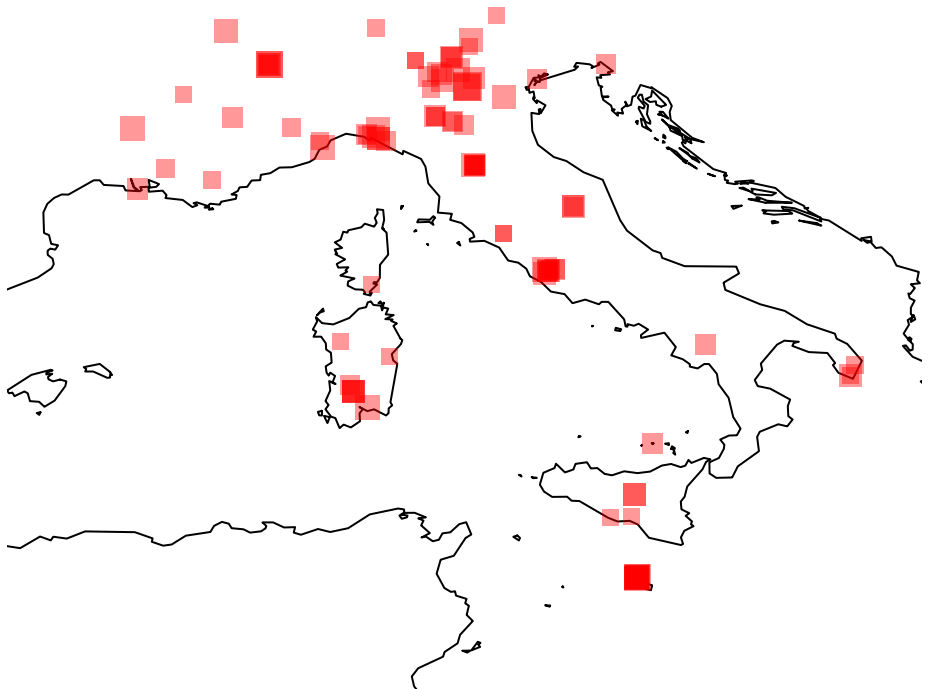

2335 cal. BC

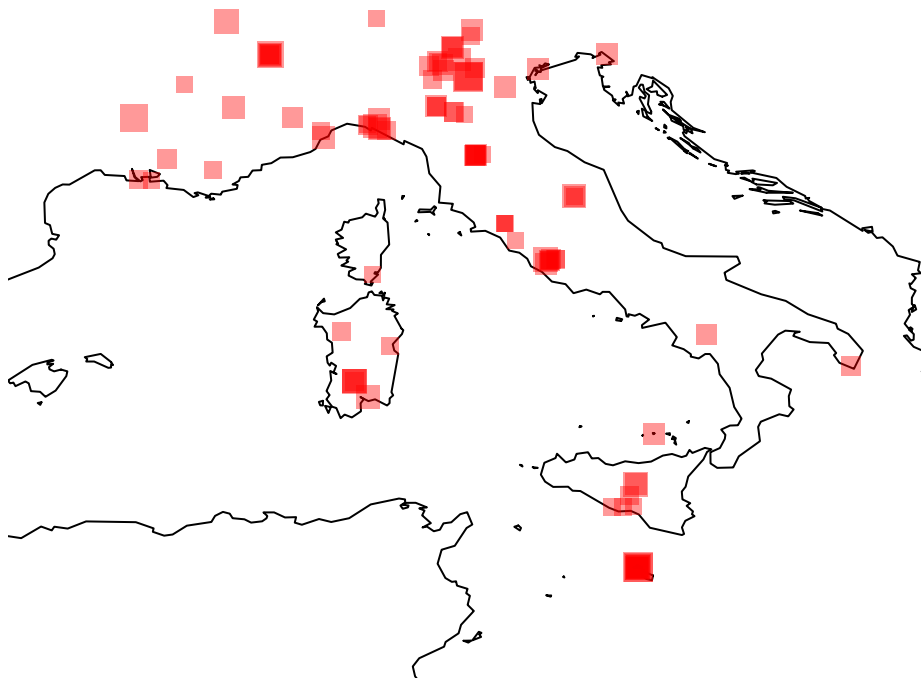

2330 cal. BC

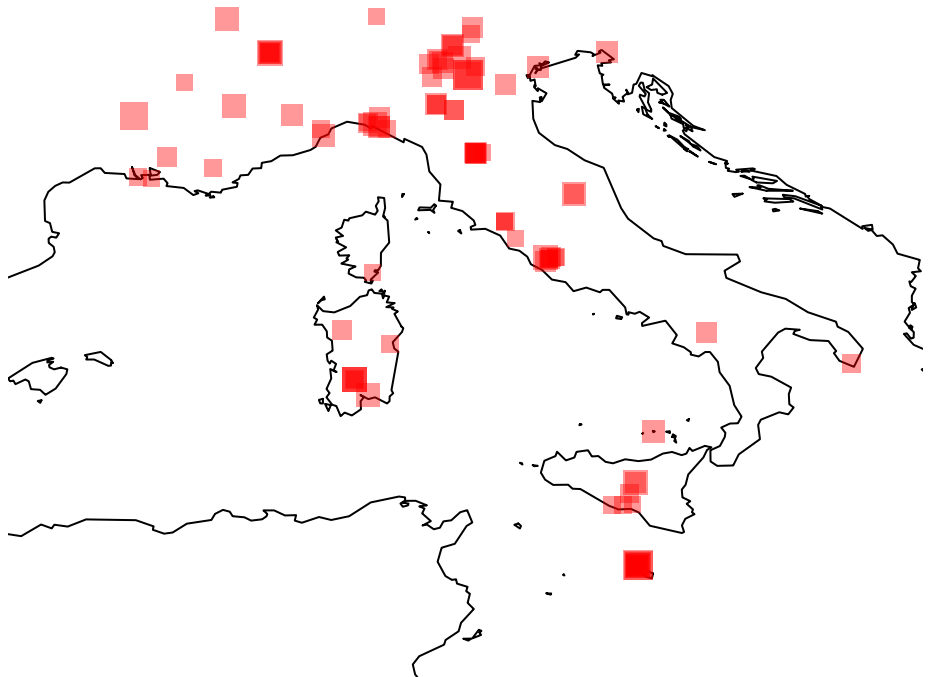









2310 cal. BC

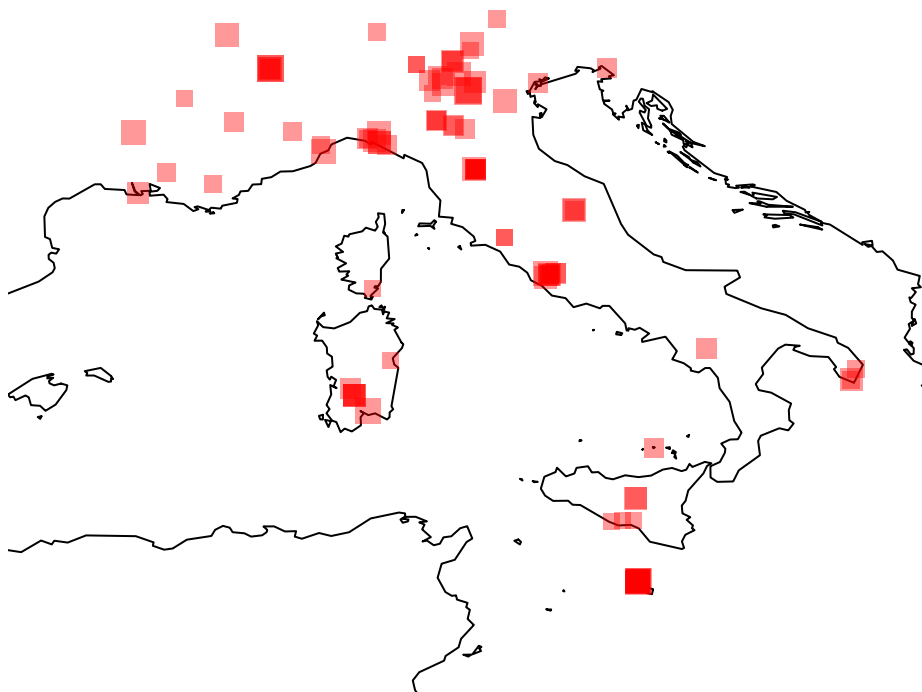

2305 cal. BC



2300 cal. BC

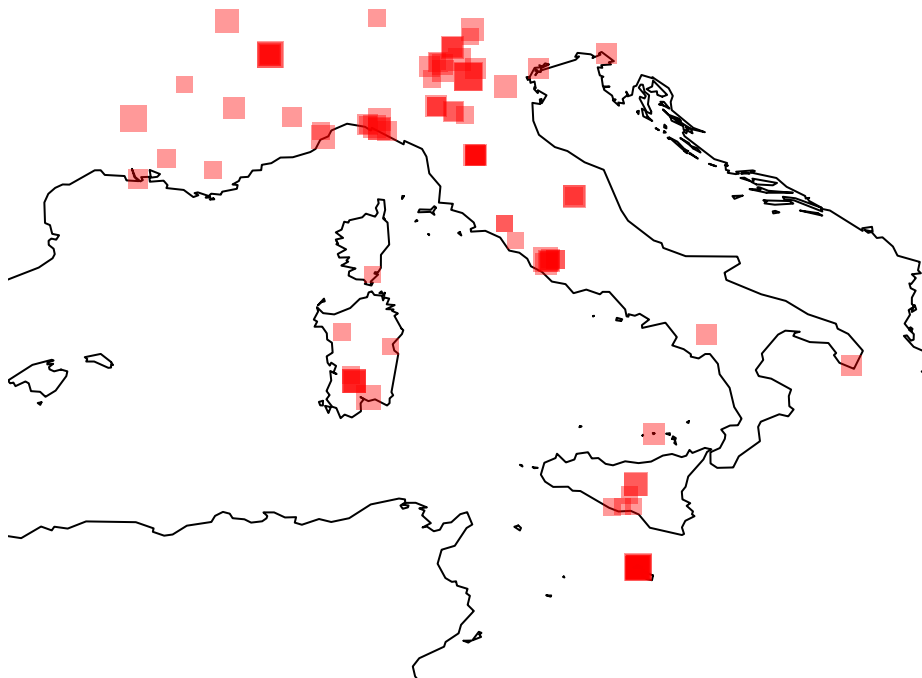



2290 cal. BC

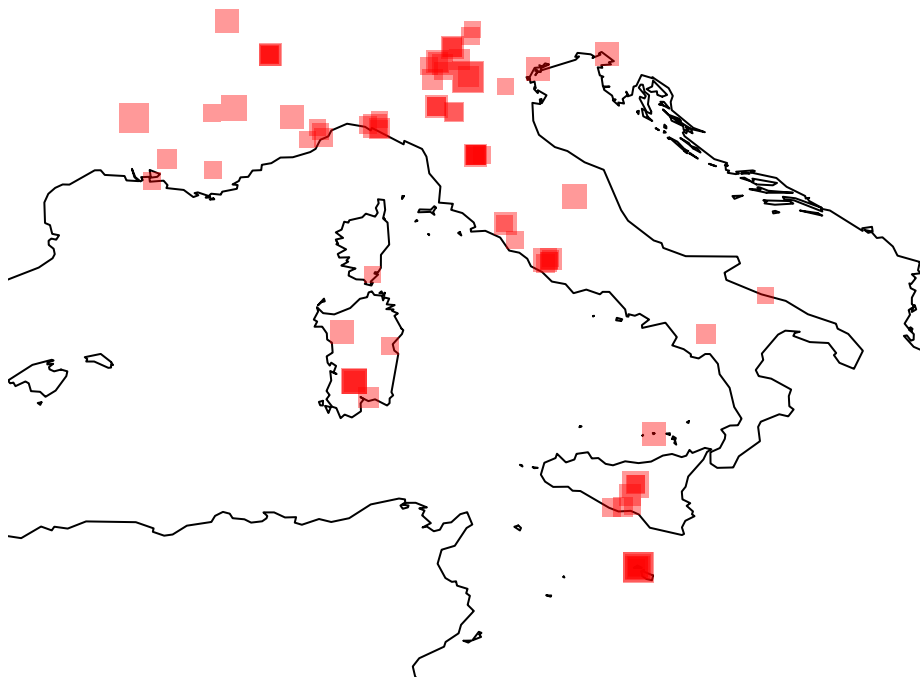



2285 cal. BC

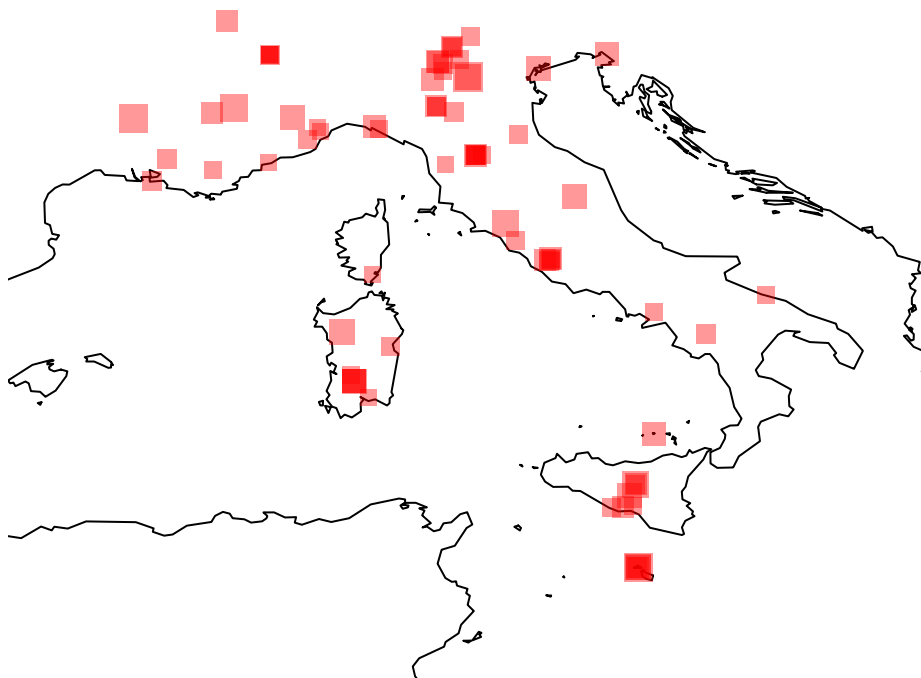

2280 cal. BC

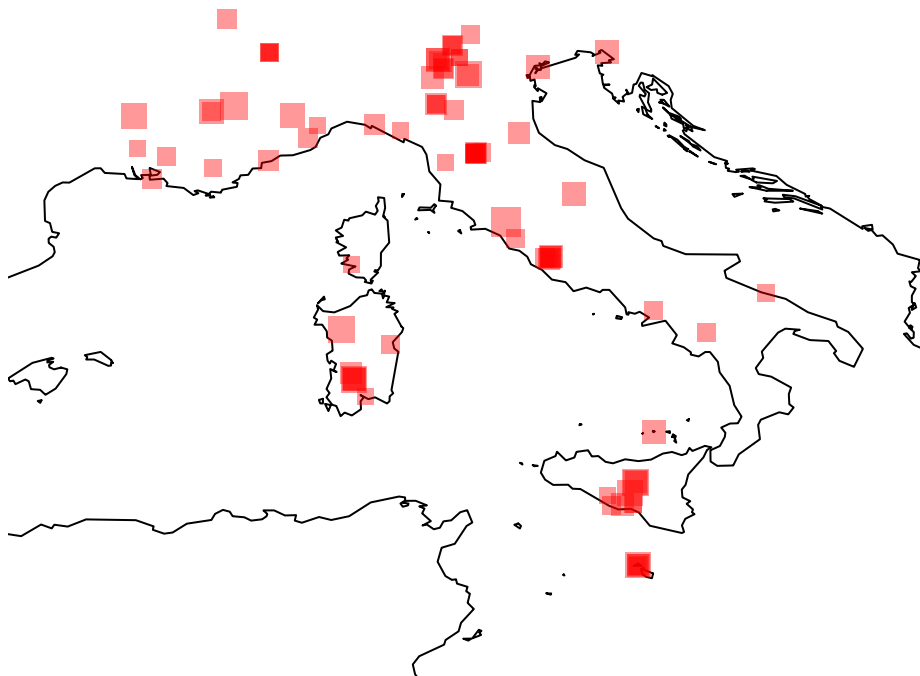

2275 cal. BC

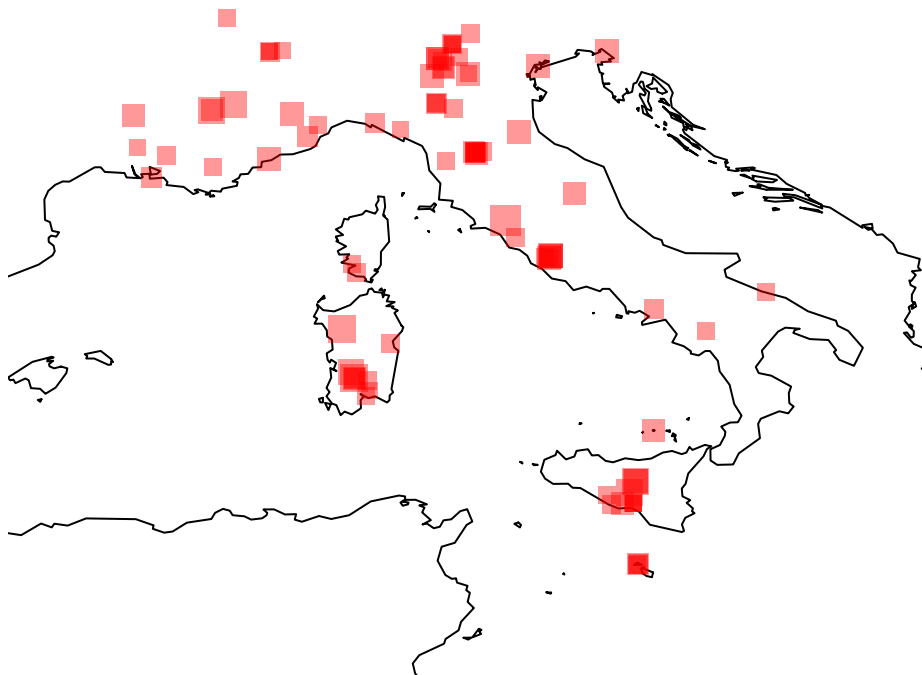

2270 cal. BC

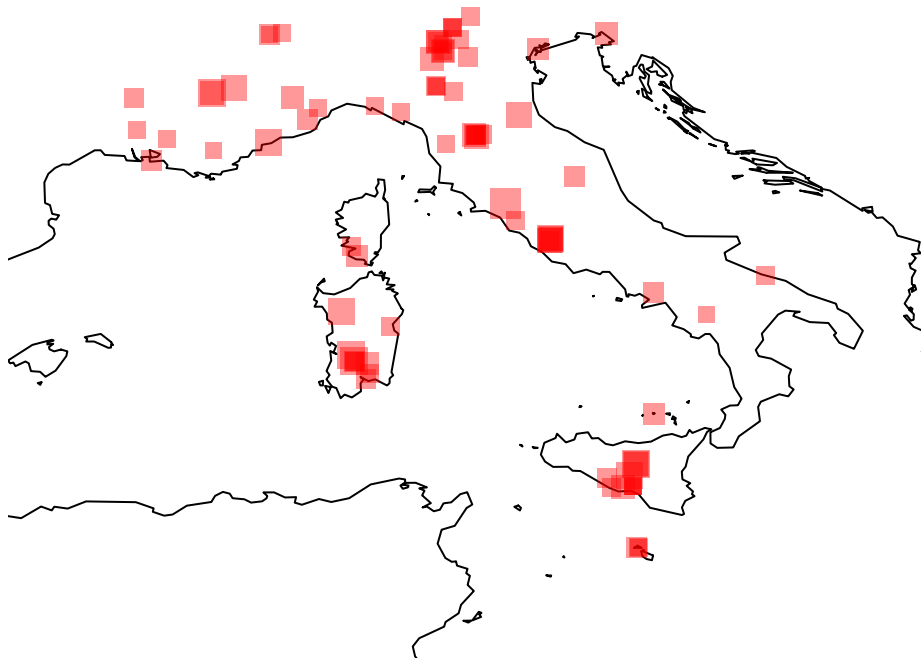

2265 cal. BC

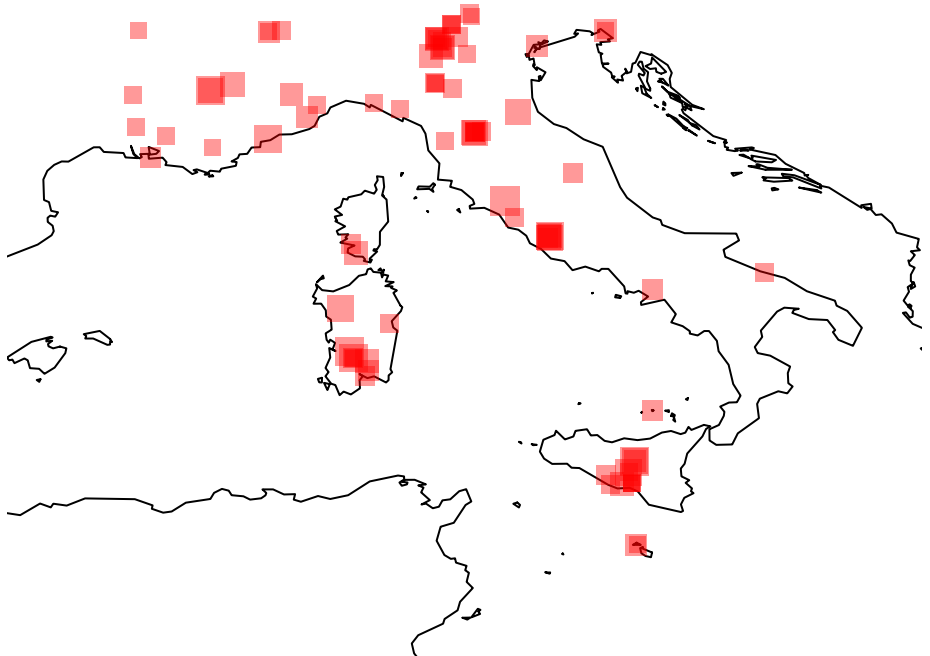

2260 cal. BC

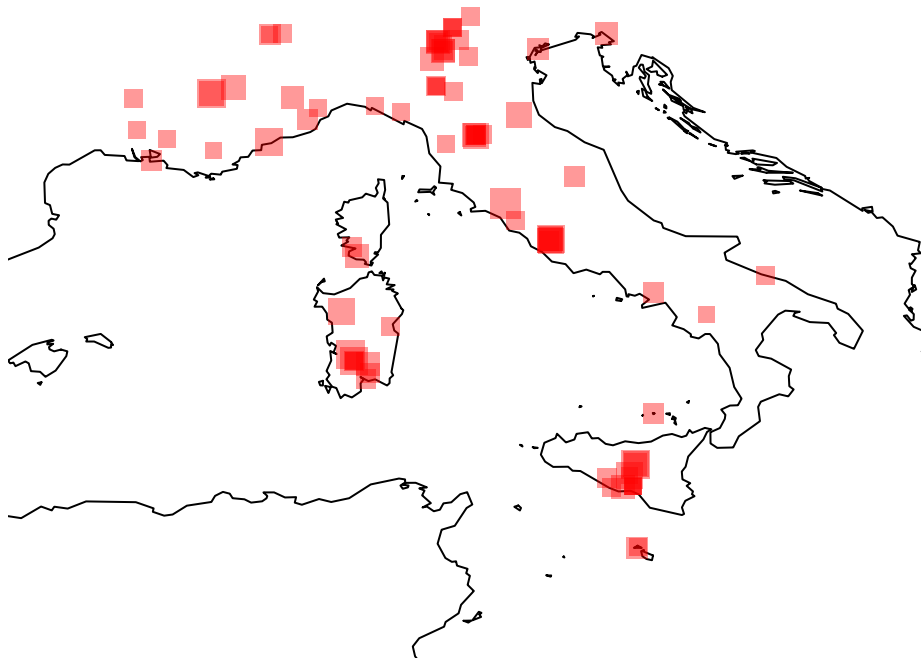

2255 cal. BC

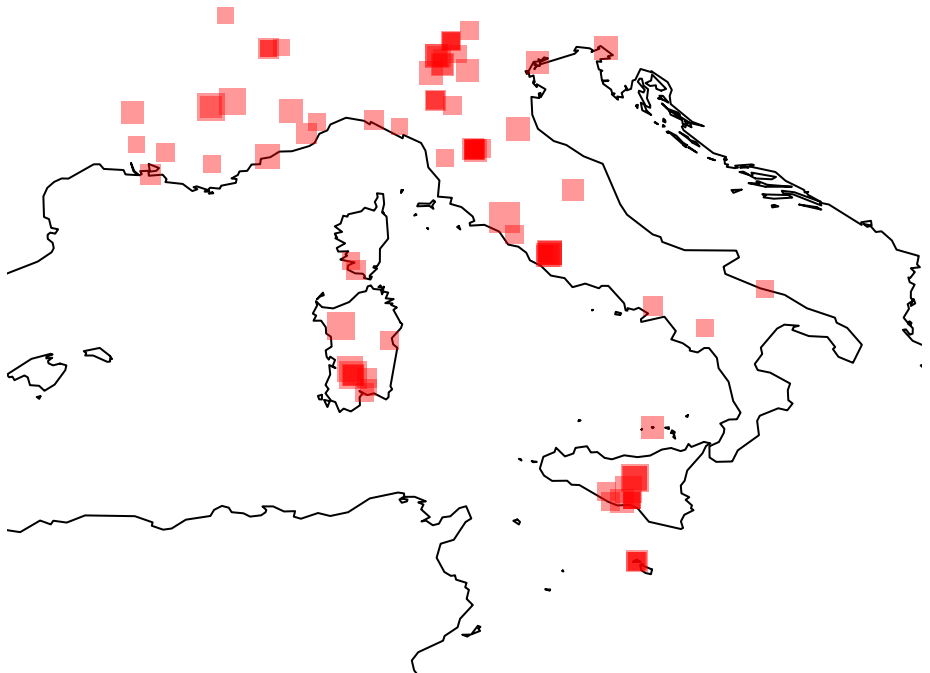

2250 cal. BC

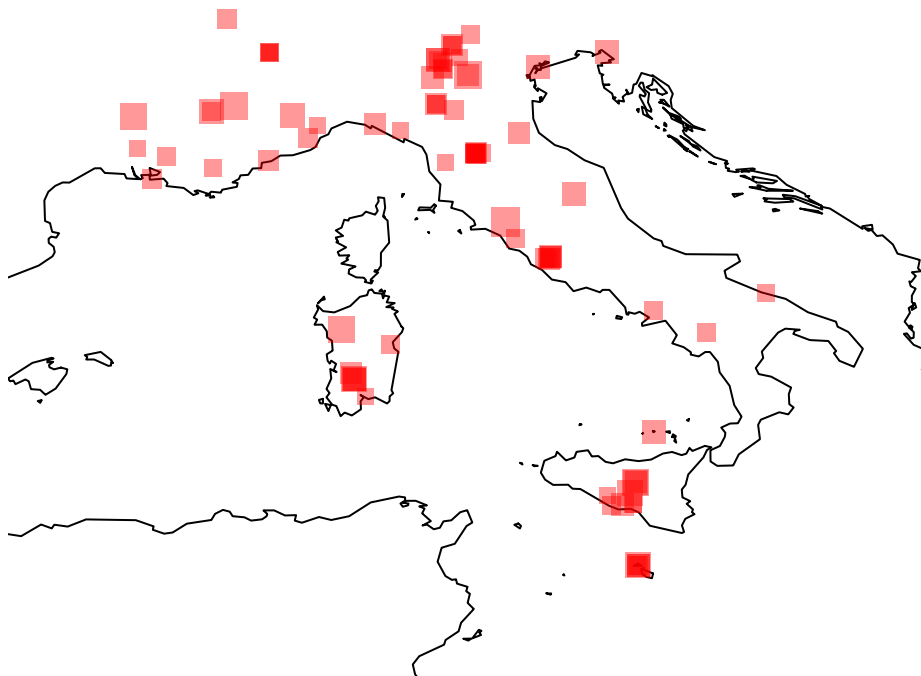



2245 cal. BC

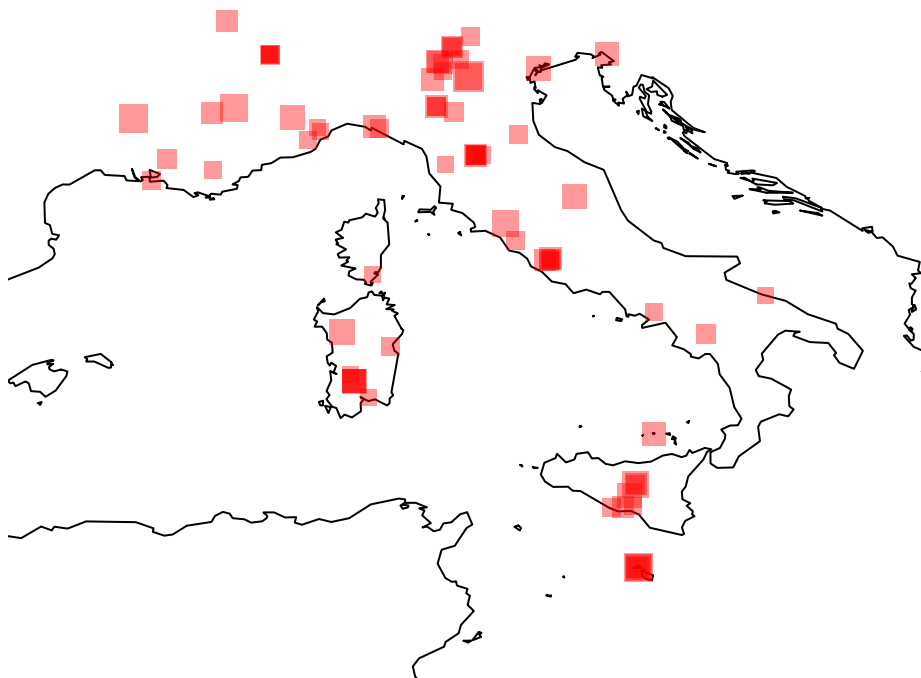

2240 cal. BC

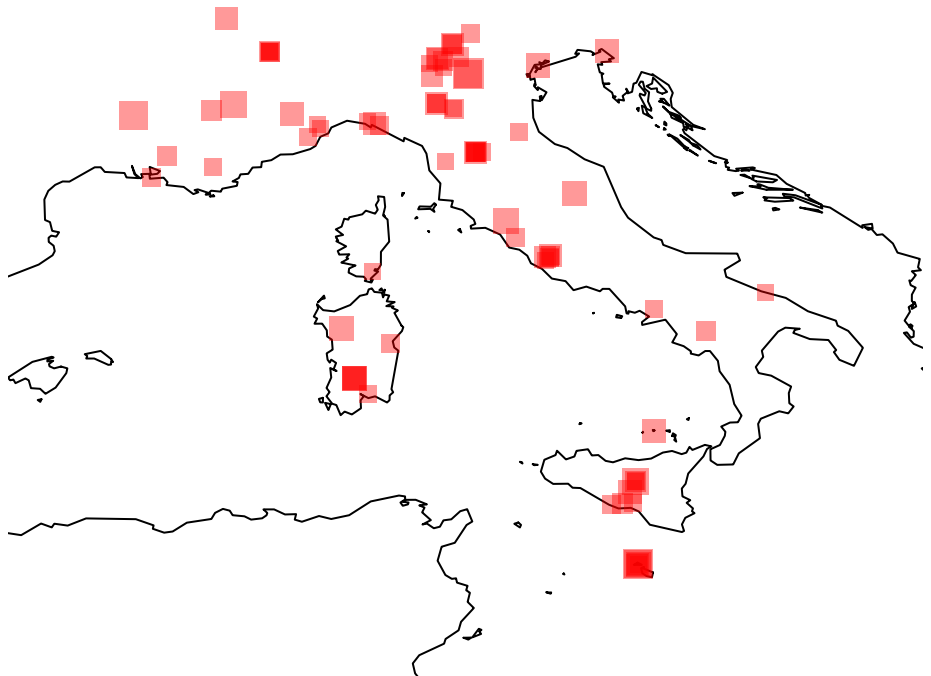



2230 cal. BC



2225 cal. BC

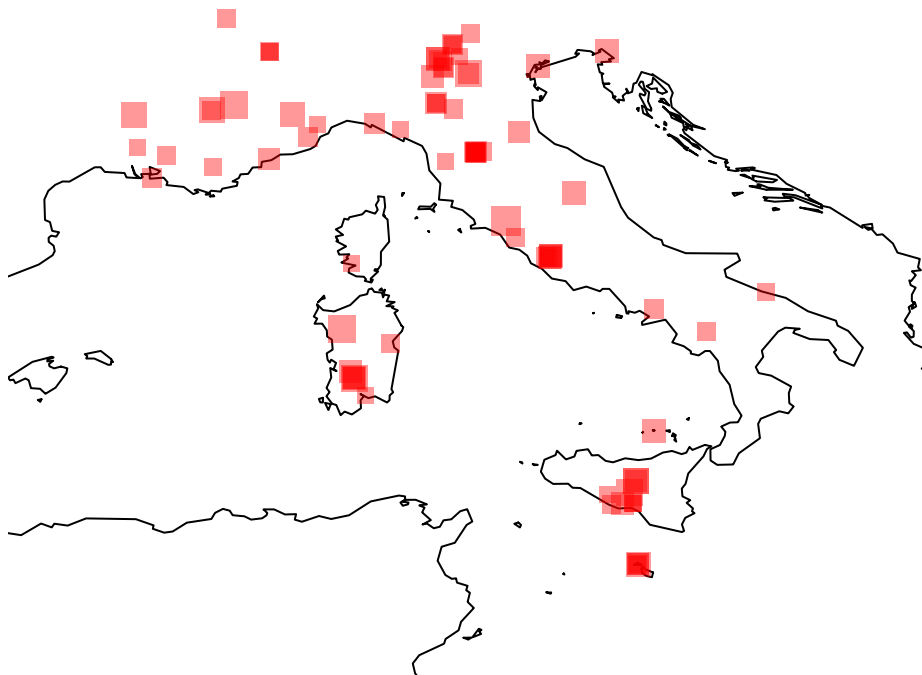









2205 cal. BC



2200 cal. BC

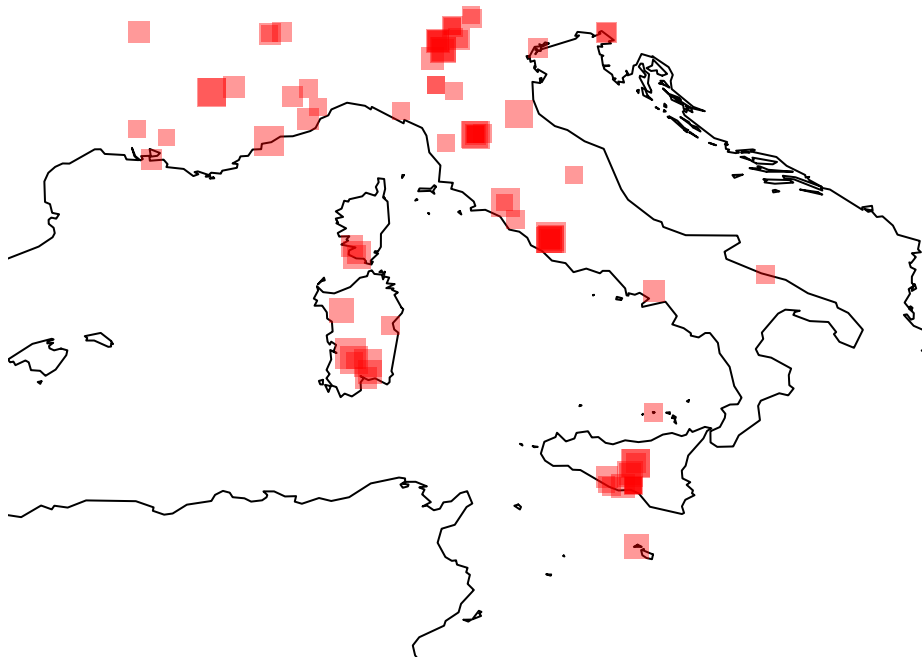

2195 cal. BC

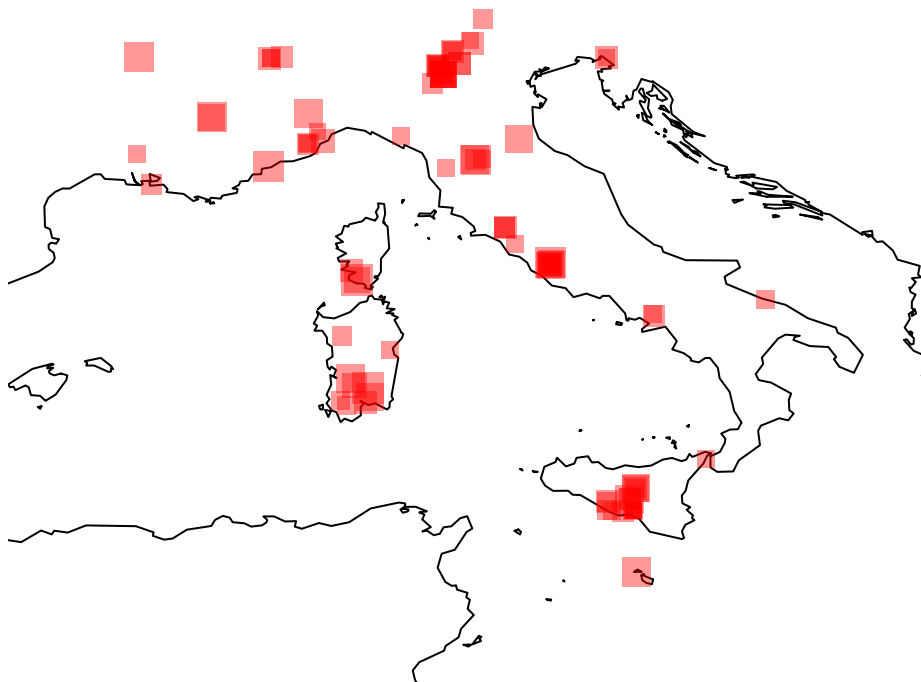

2190 cal. BC

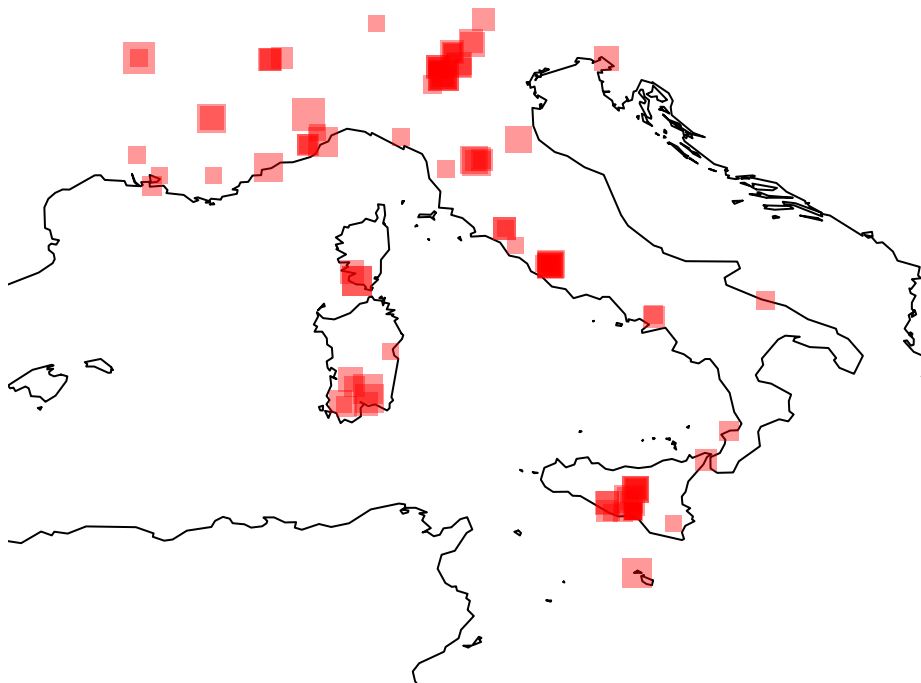

2185 cal. BC

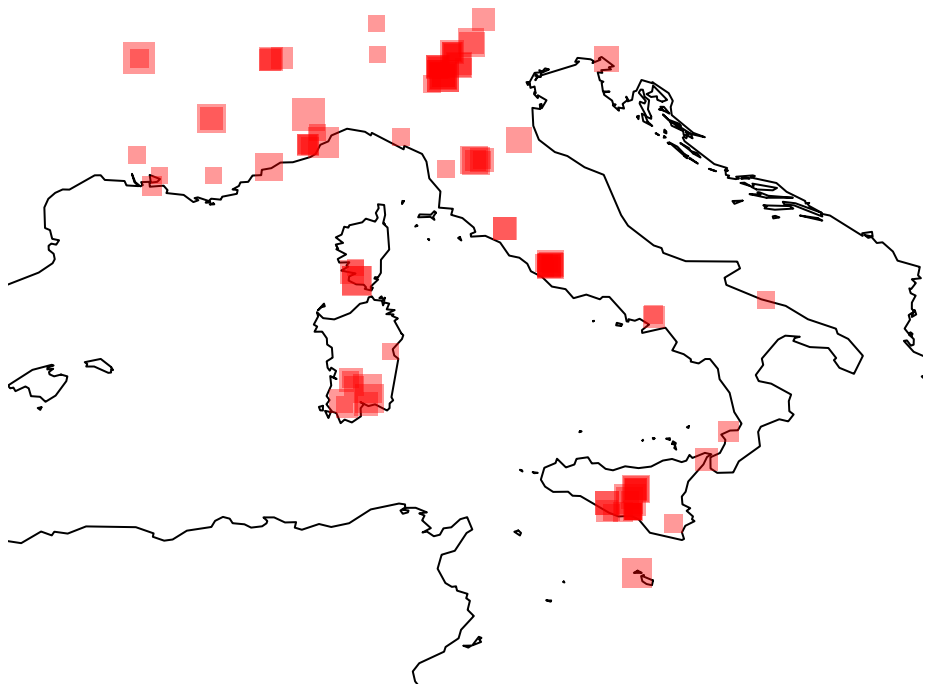

2180 cal. BC

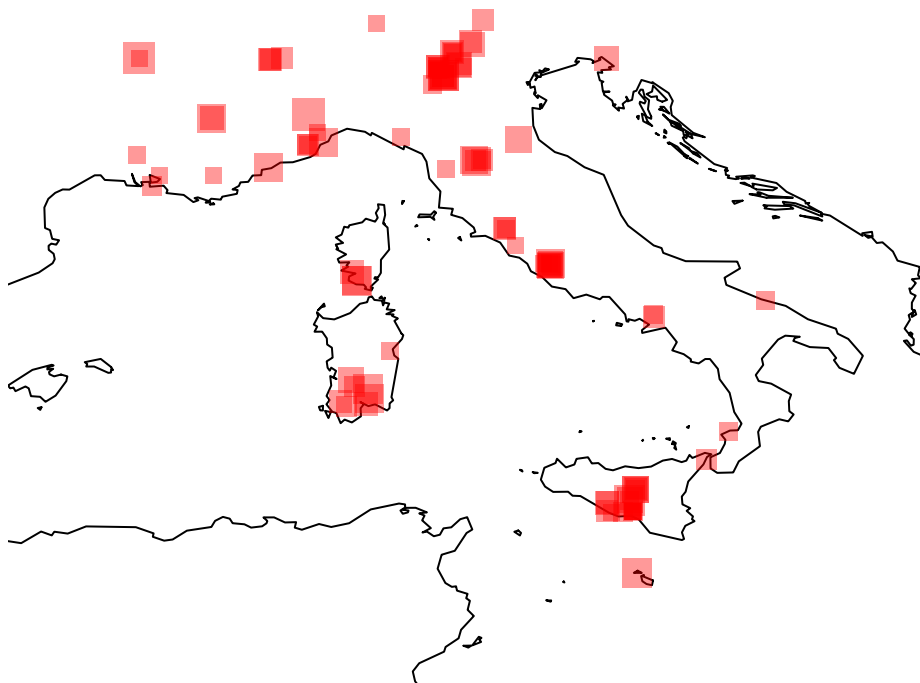

2175 cal. BC

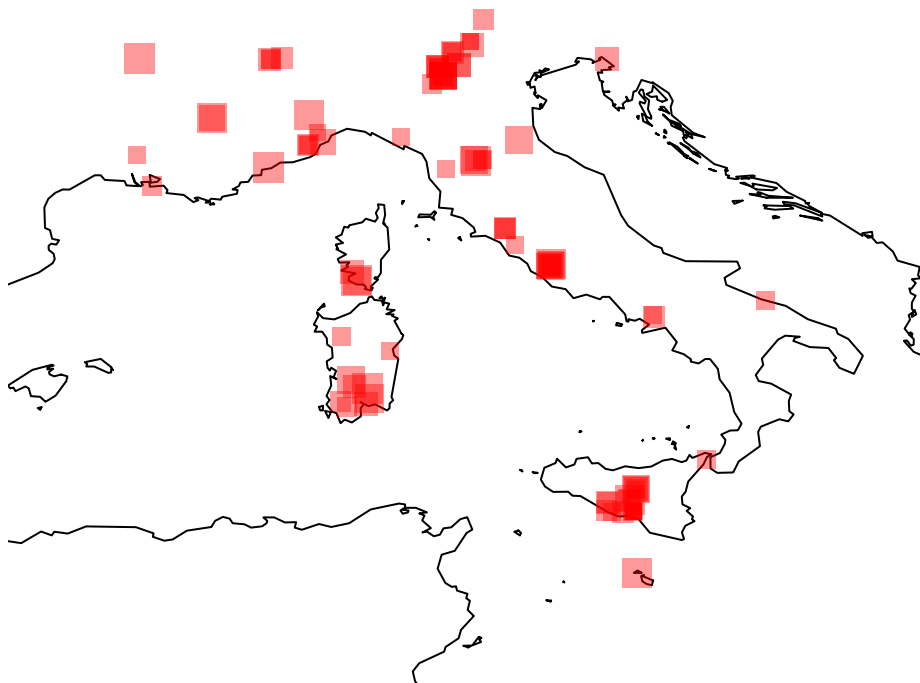

2170 cal. BC

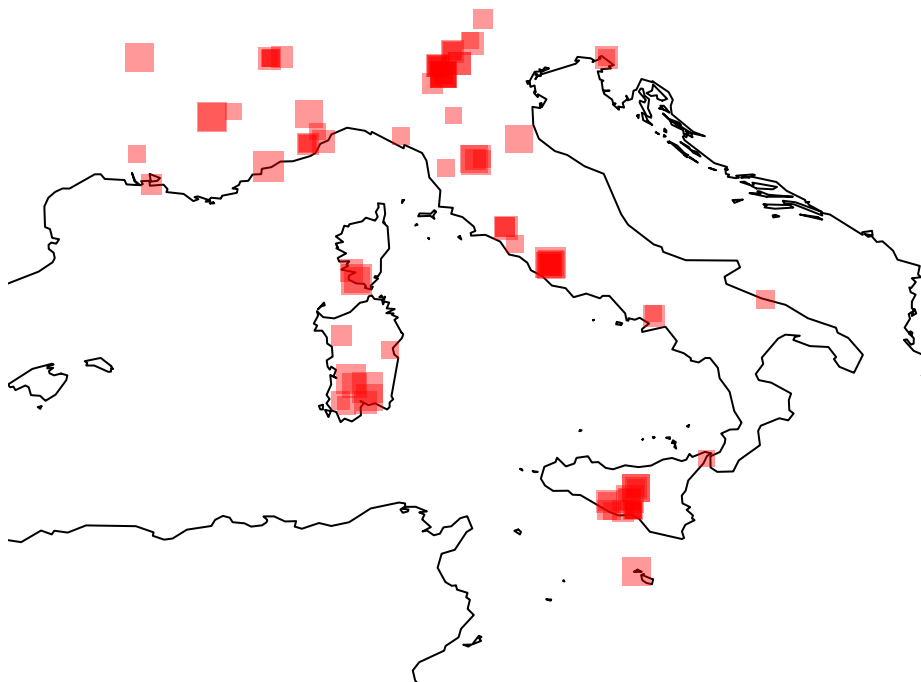



2165 cal. BC

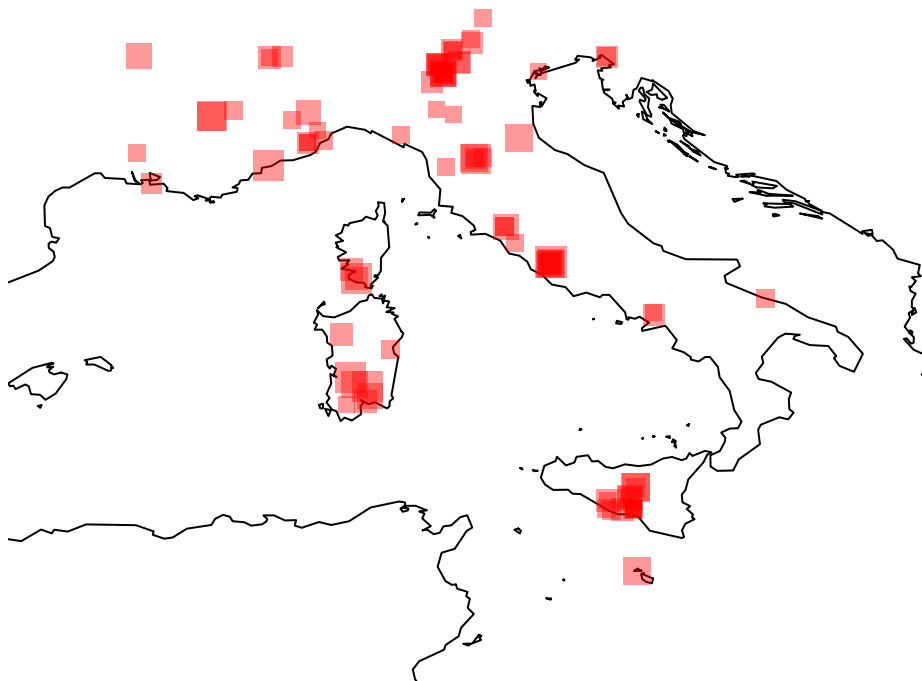

2160 cal. BC

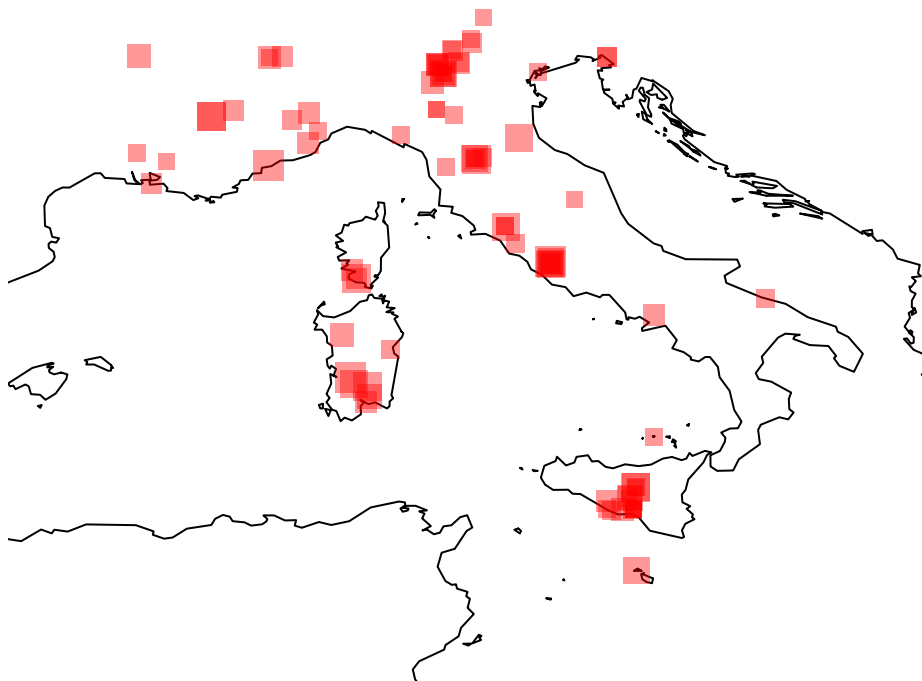

2155 cal. BC

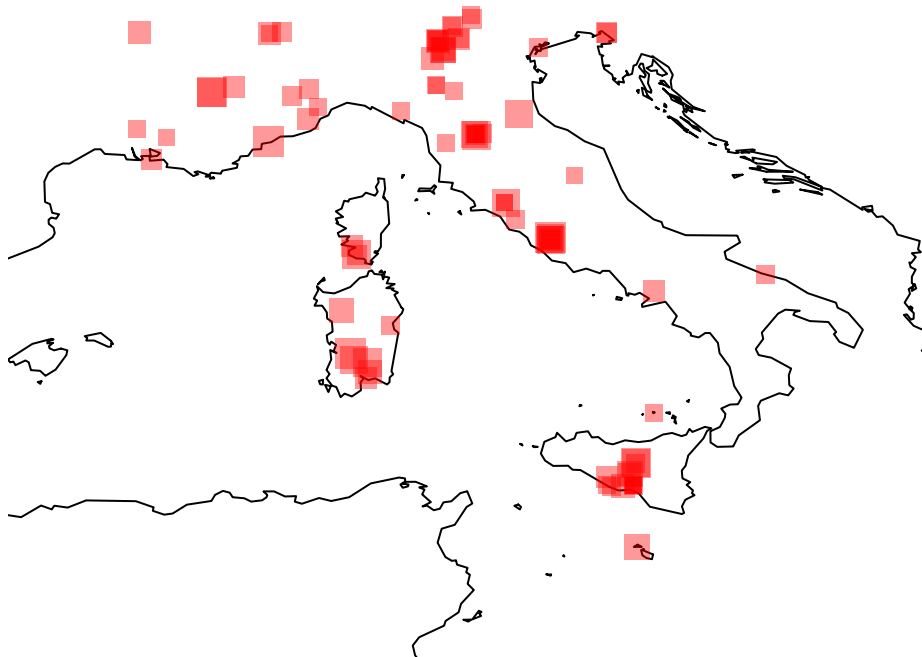

2150 cal. BC

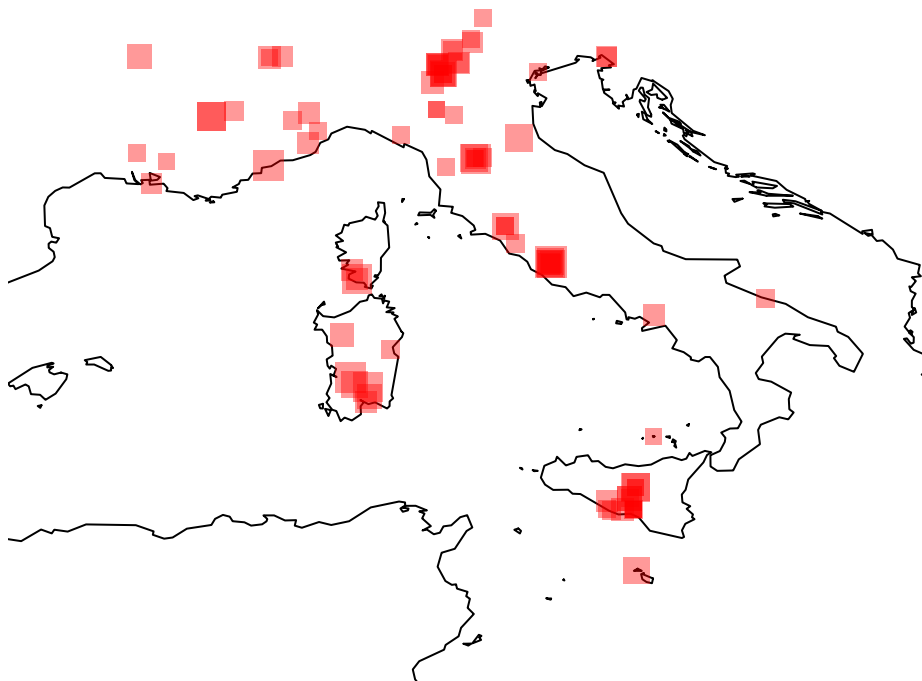

2145 cal. BC

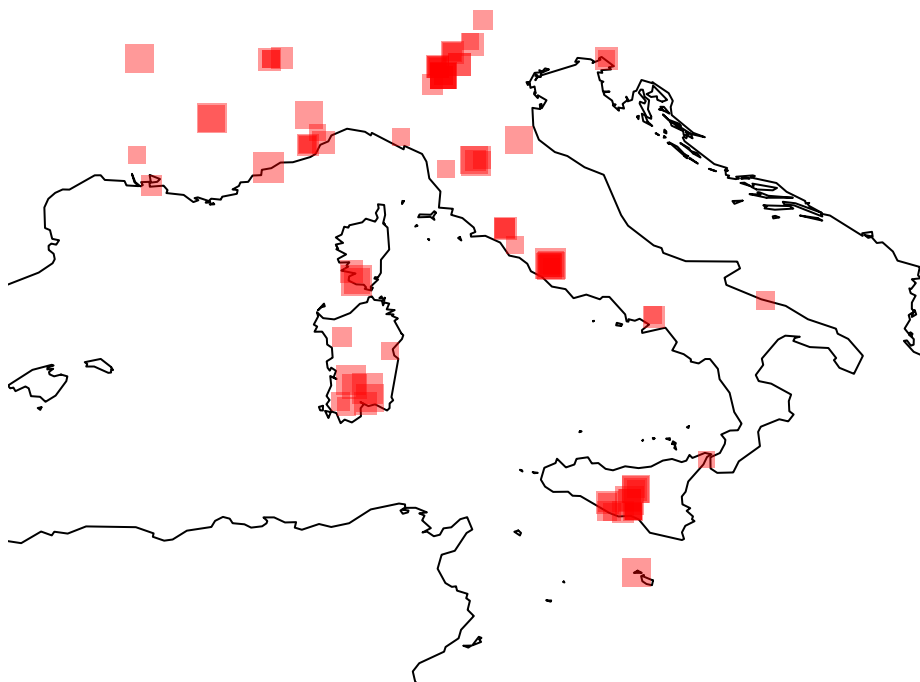



2135 cal. BC

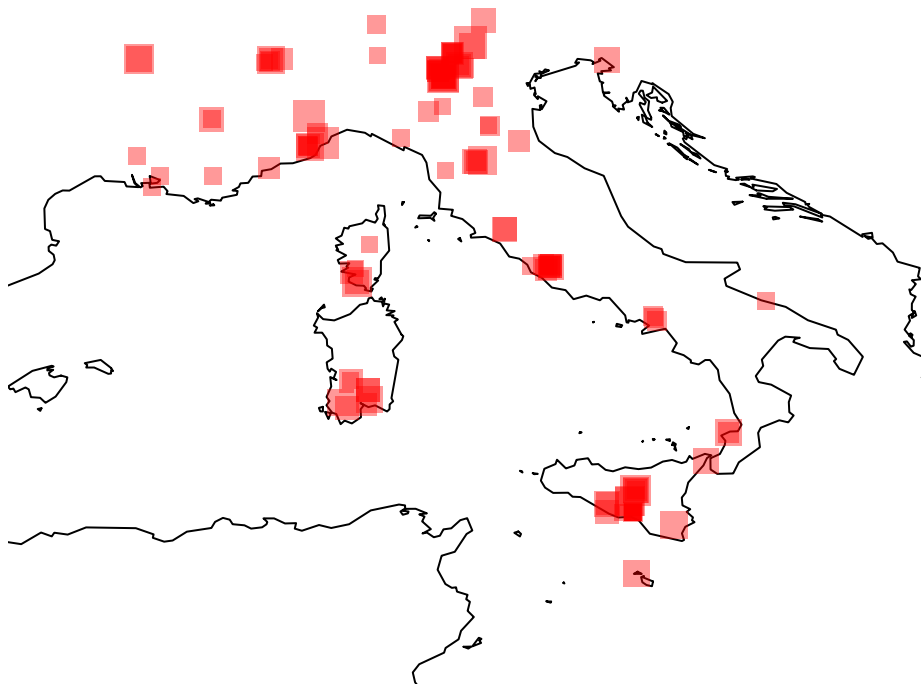

2130 cal. BC

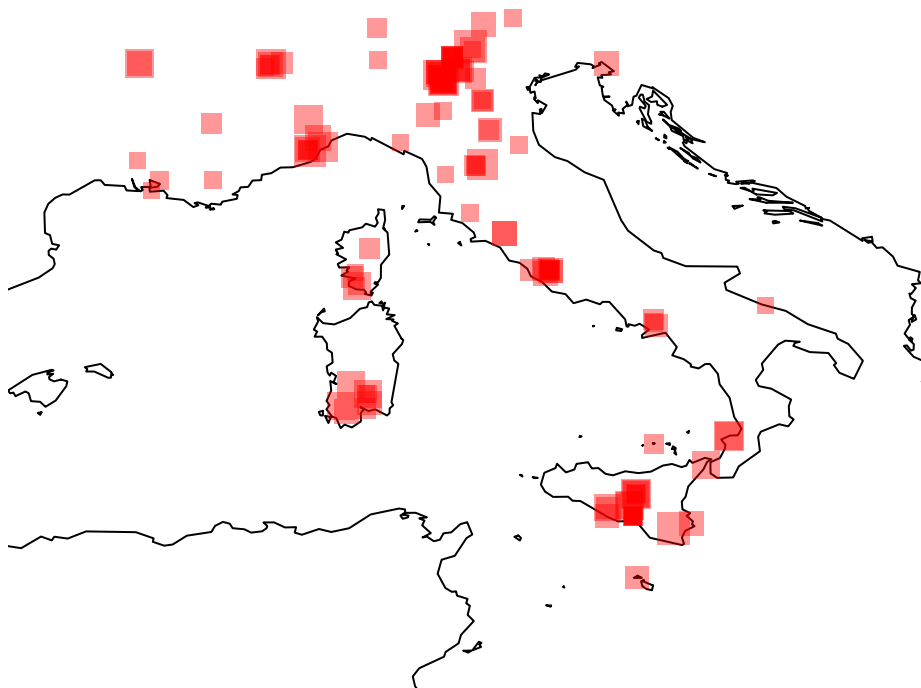



2125 cal. BC

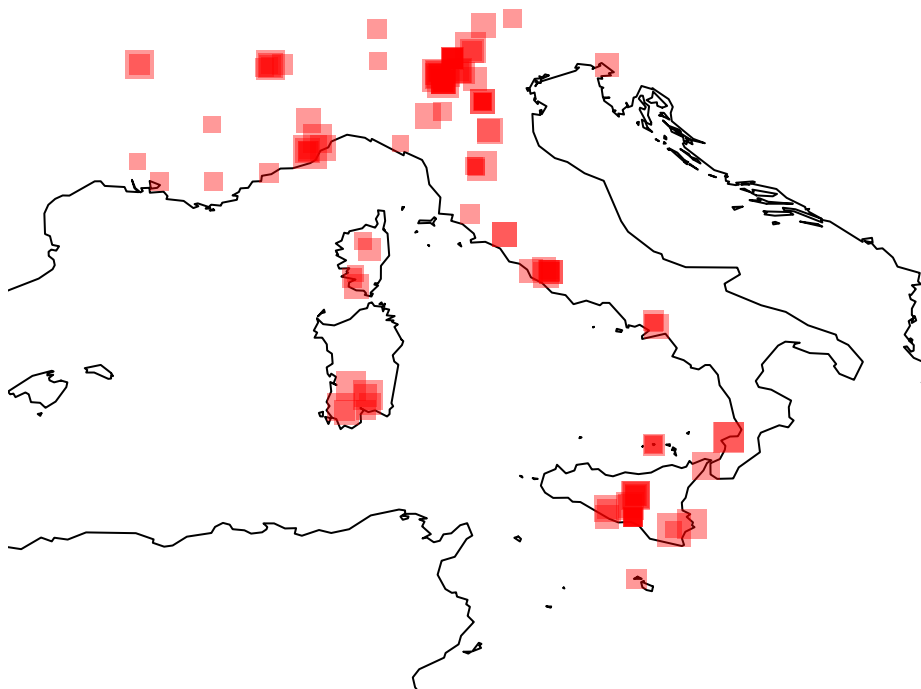

2120 cal. BC

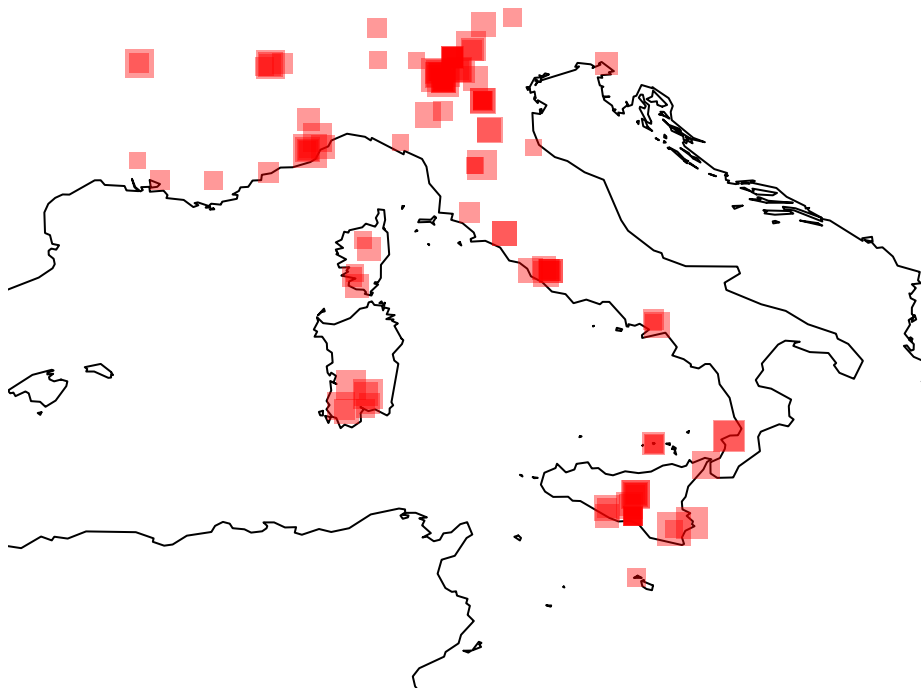

2115 cal. BC

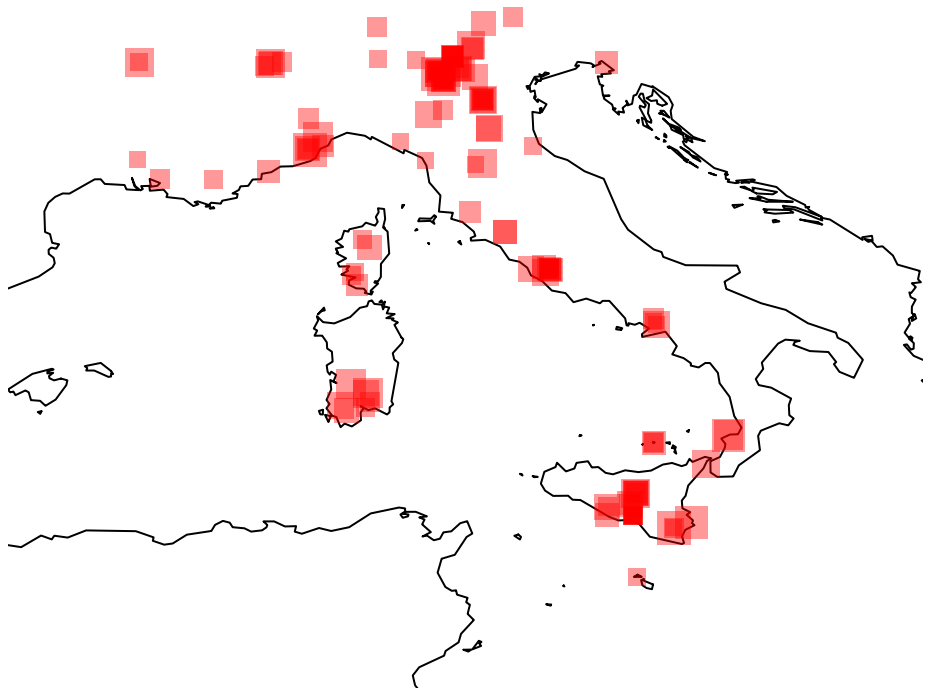

2110 cal. BC

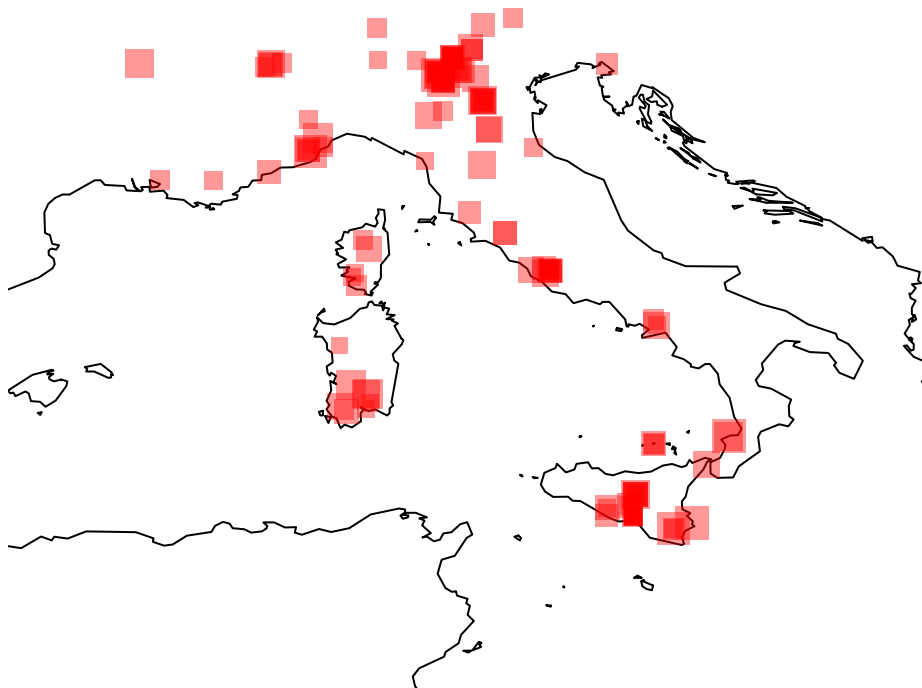

2105 cal. BC

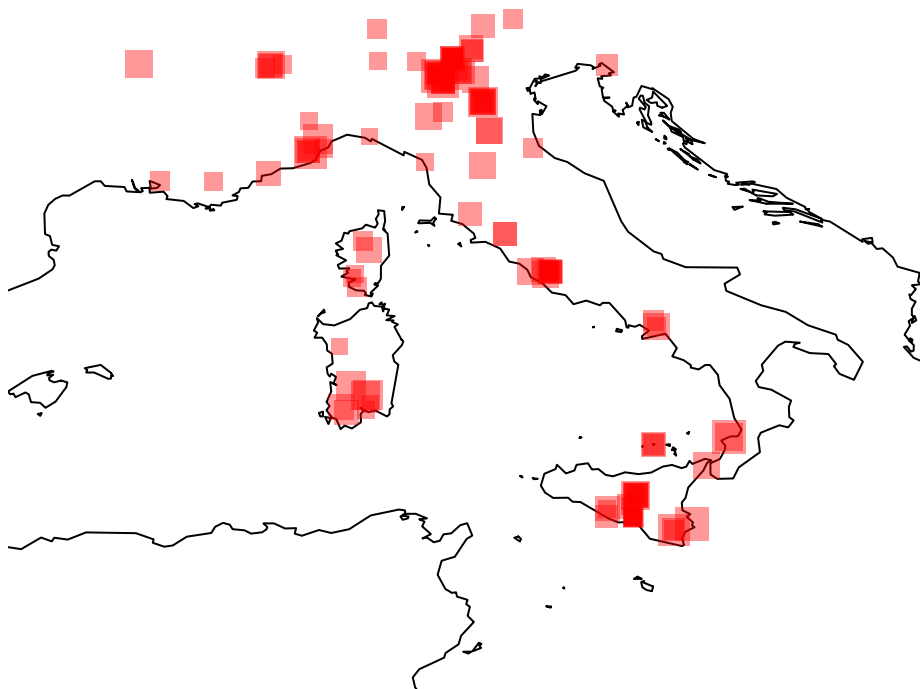

2100 cal. BC

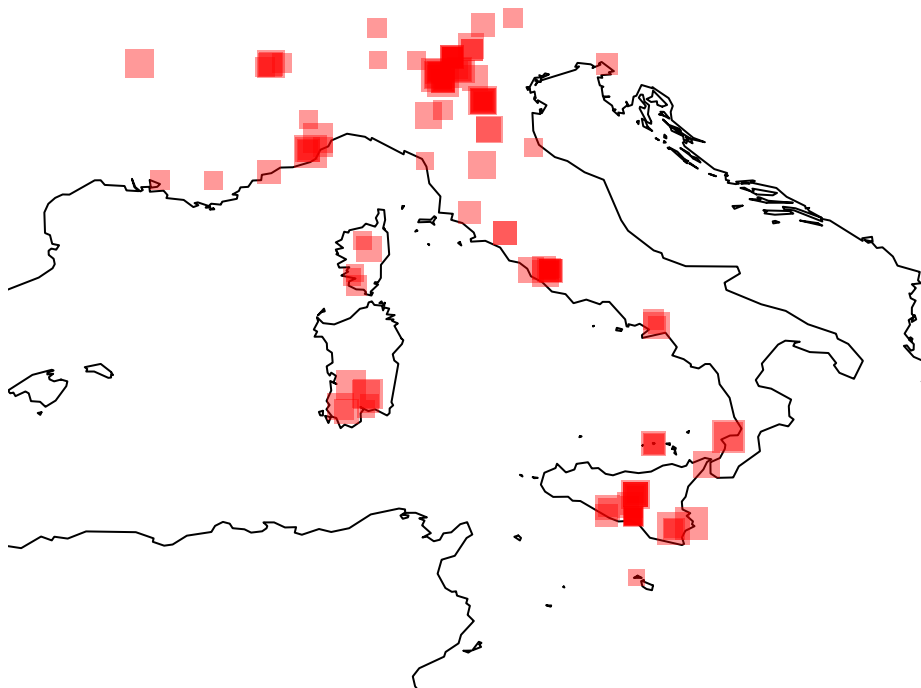

2095 cal. BC

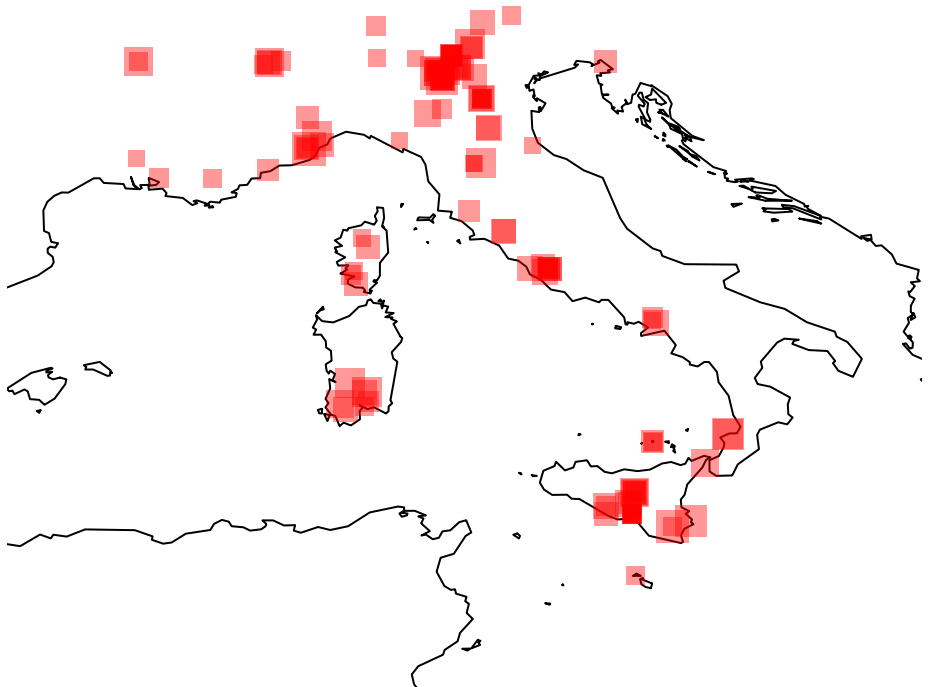

2090 cal. BC

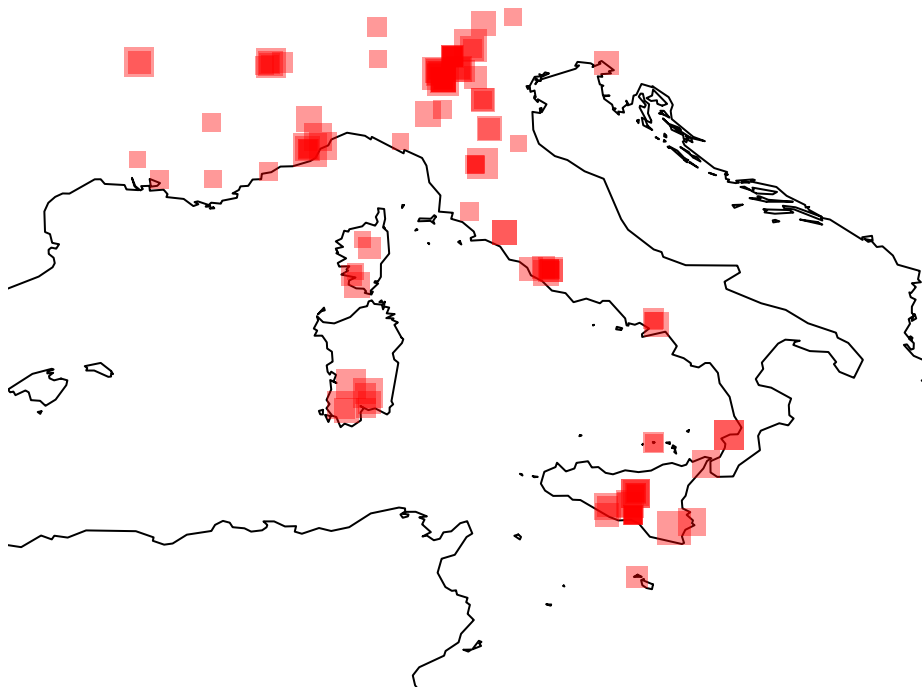





2080 cal. BC

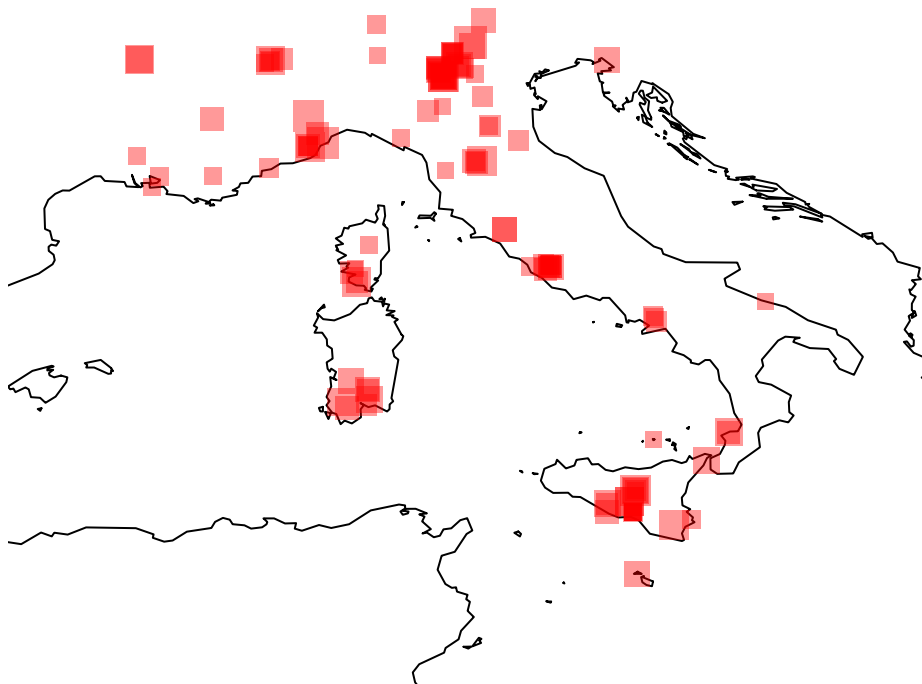

2075 cal. BC

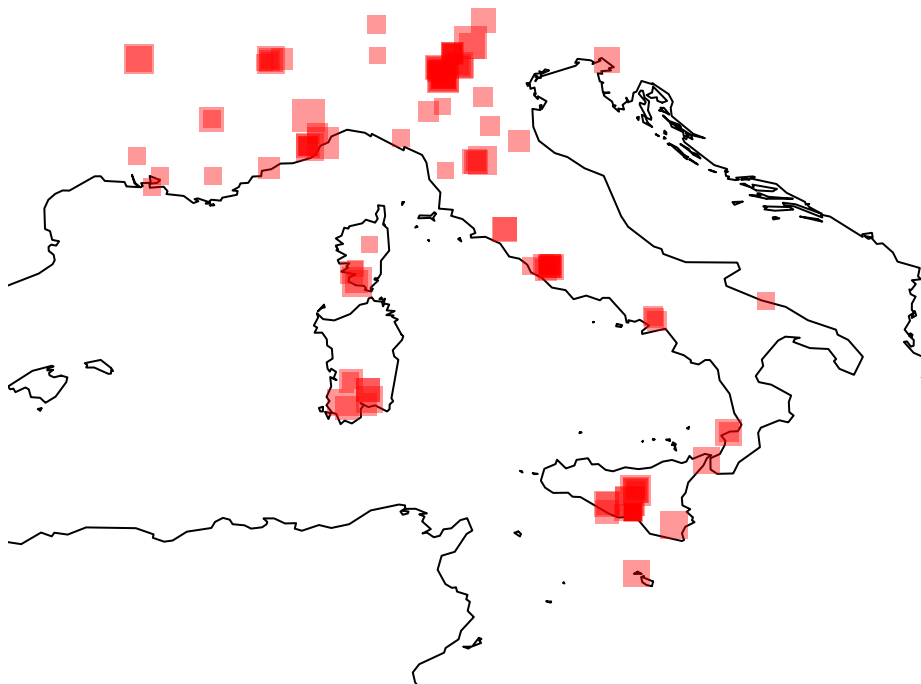

2070 cal. BC

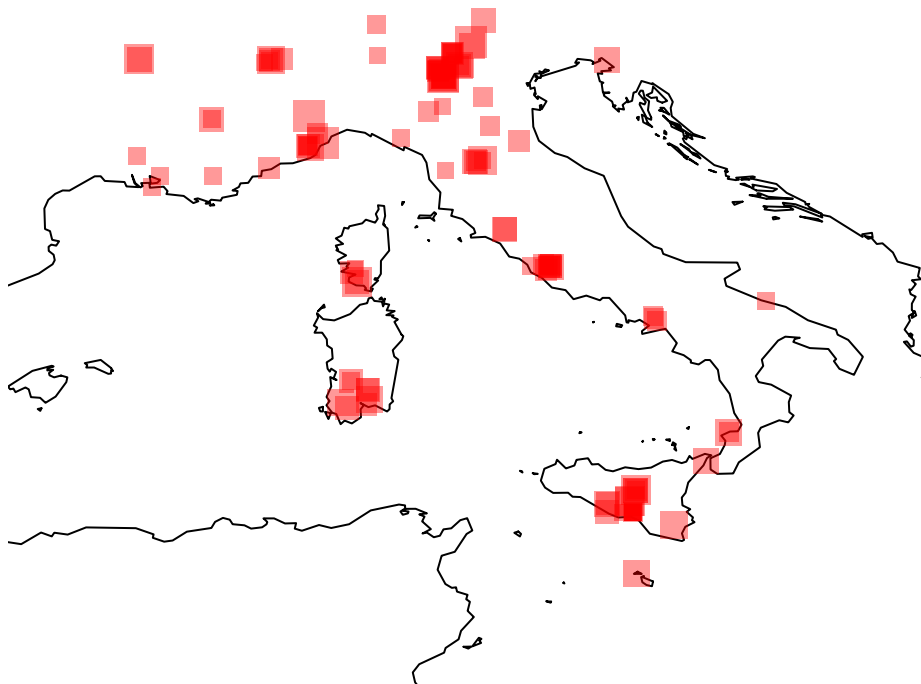

2065 cal. BC

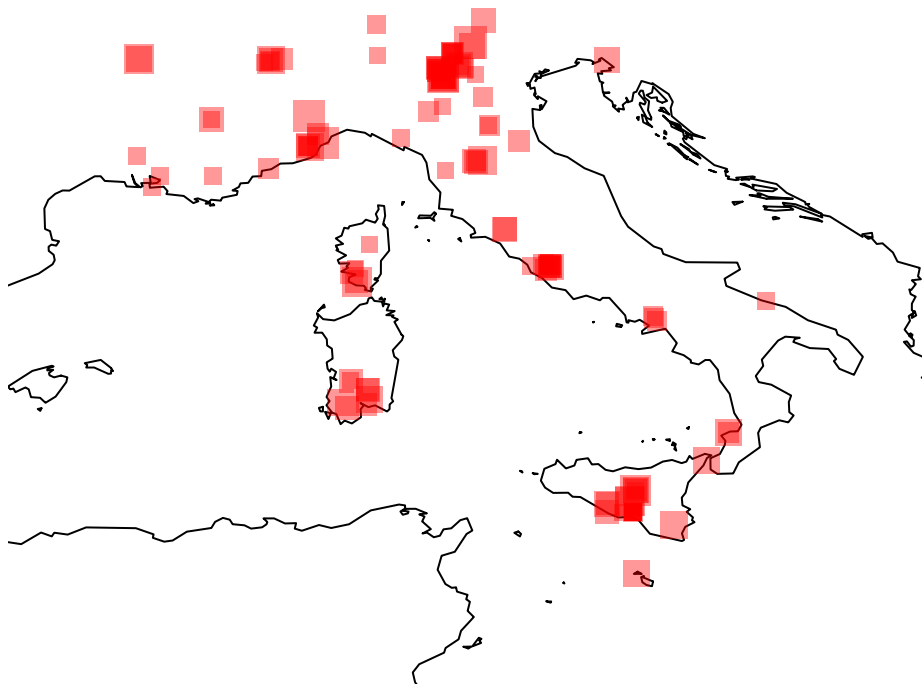

2060 cal. BC

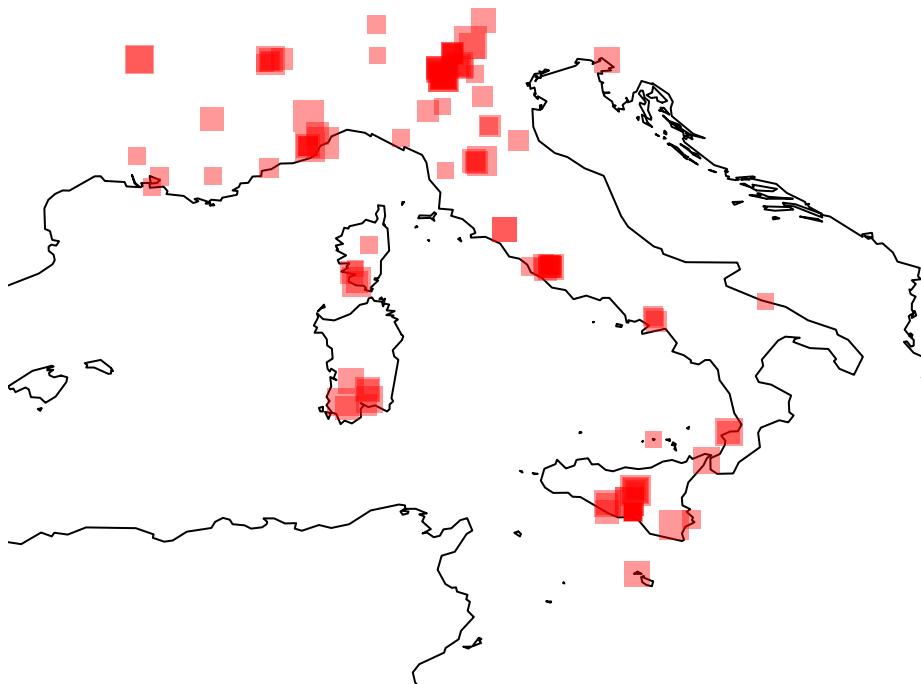

2055 cal. BC

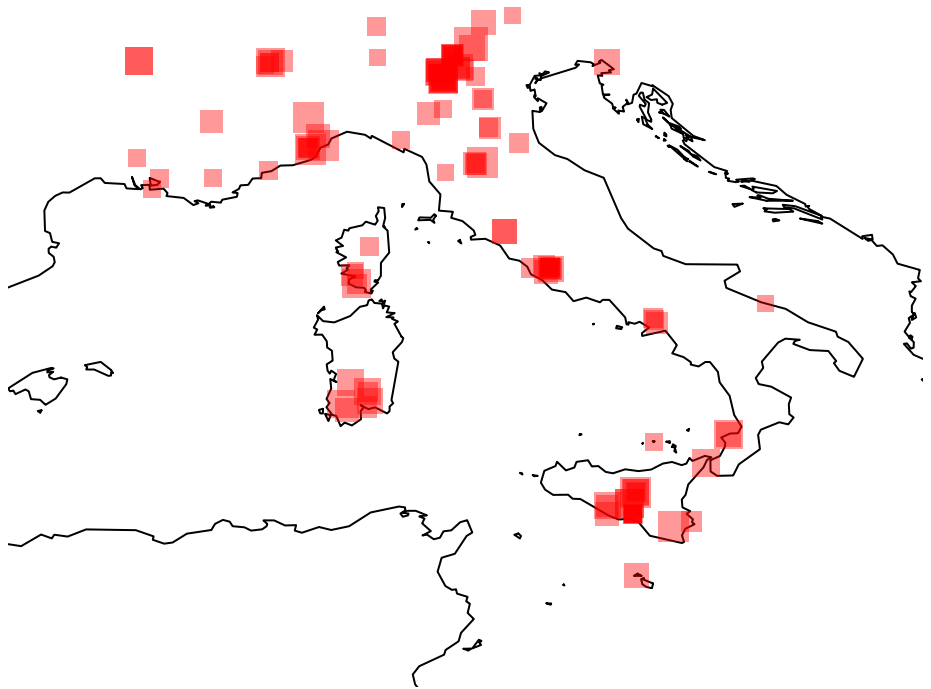

2050 cal. BC

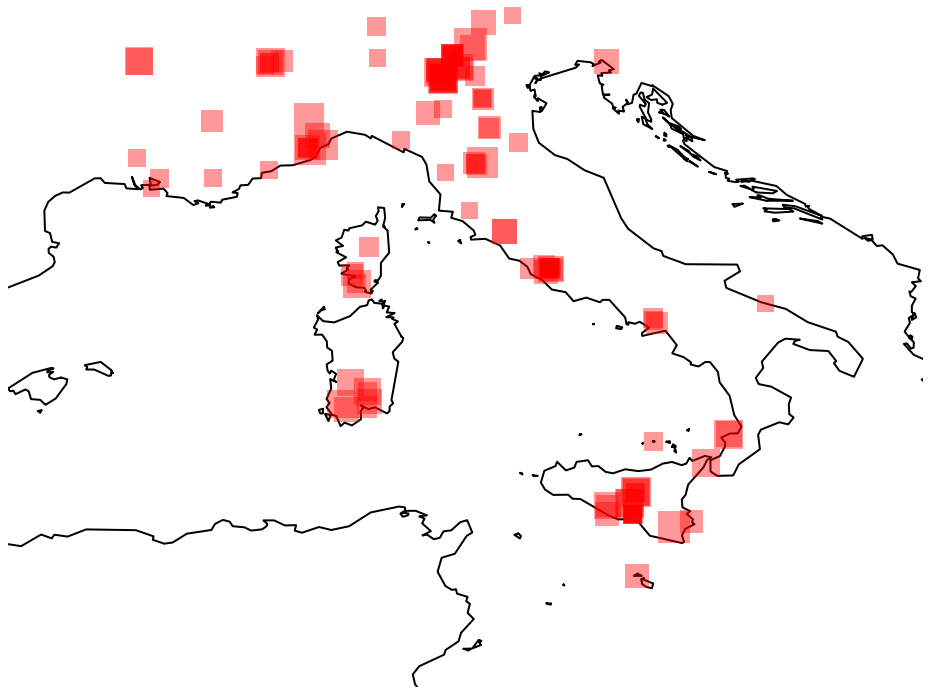



2045 cal. BC

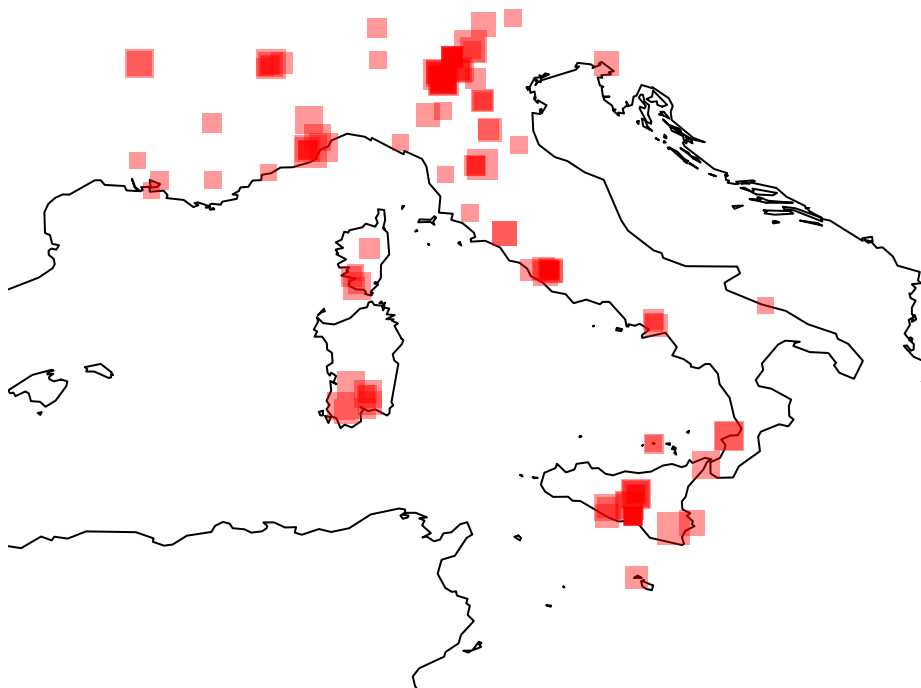

2040 cal. BC

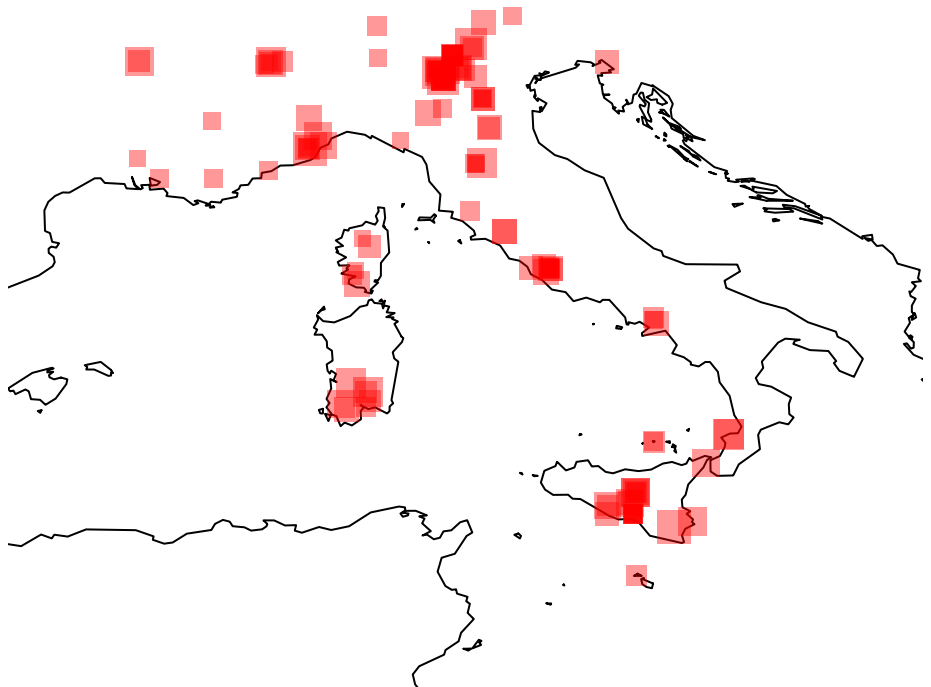

2035 cal. BC

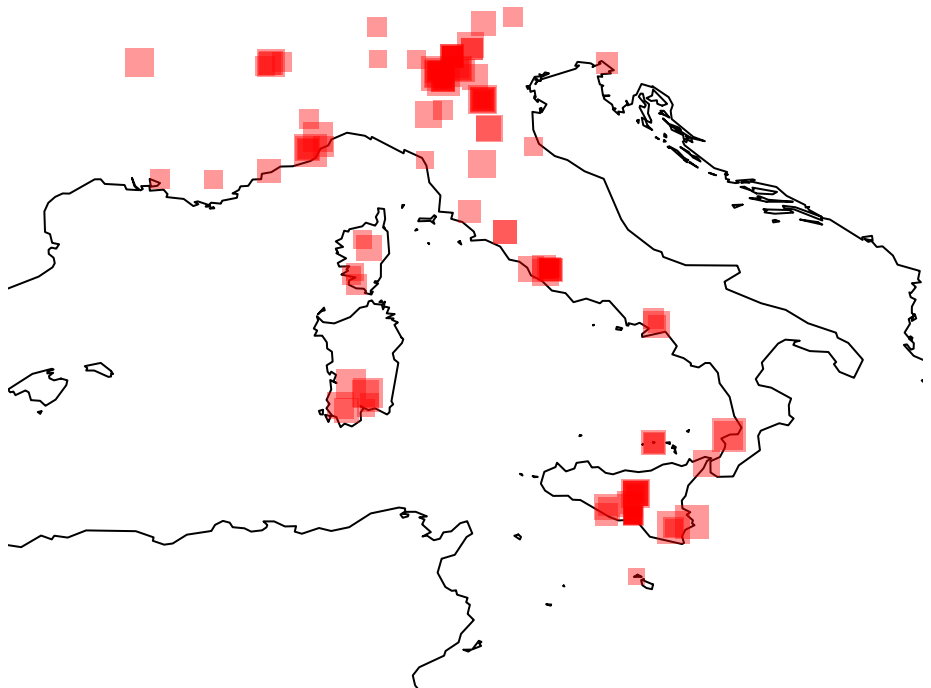

2030 cal. BC

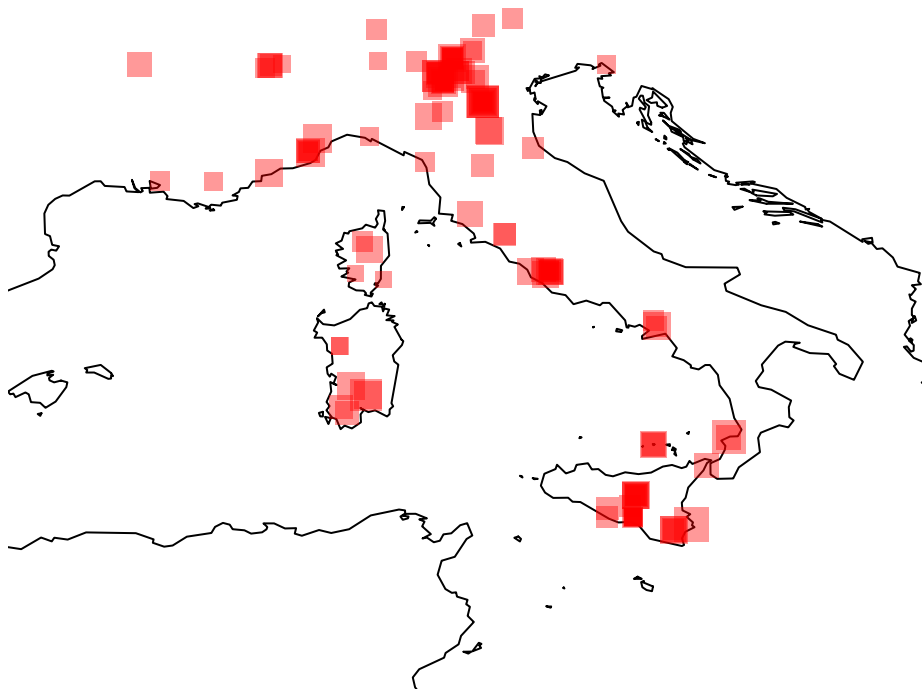



2020 cal. BC

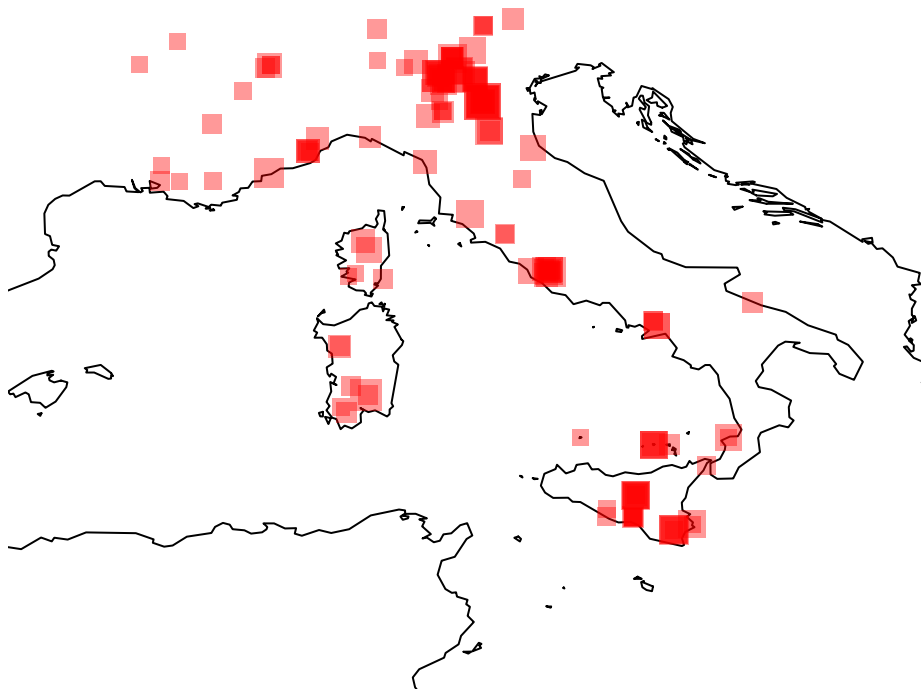

2015 cal. BC

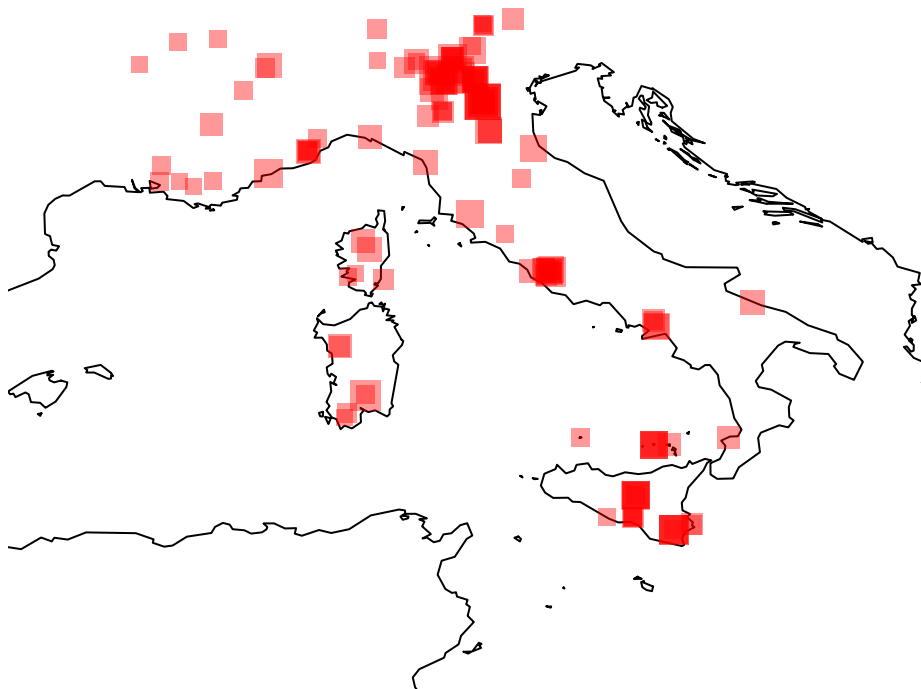

2010 cal. BC

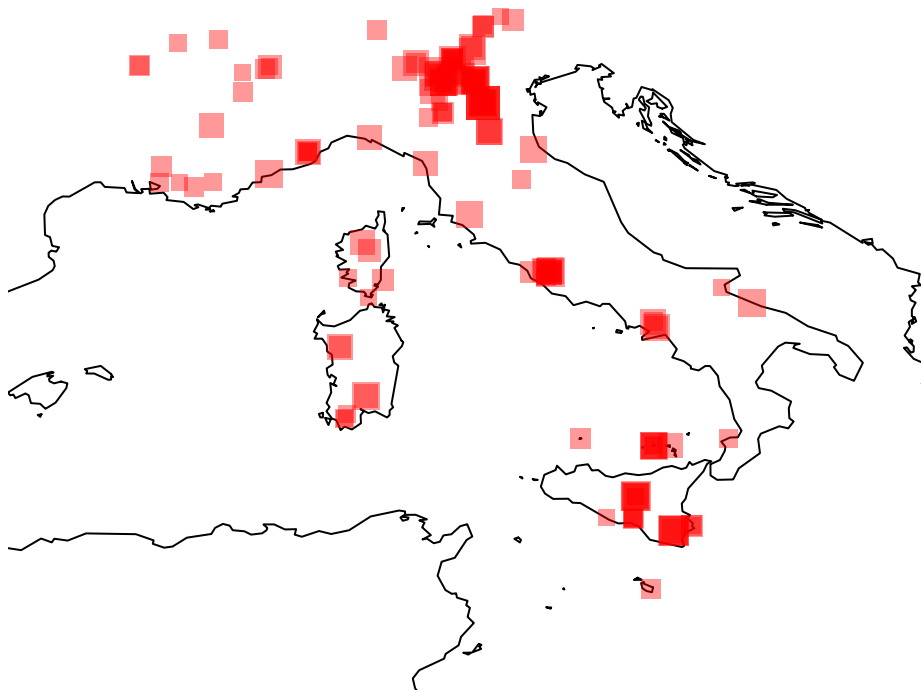





2000 cal. BC

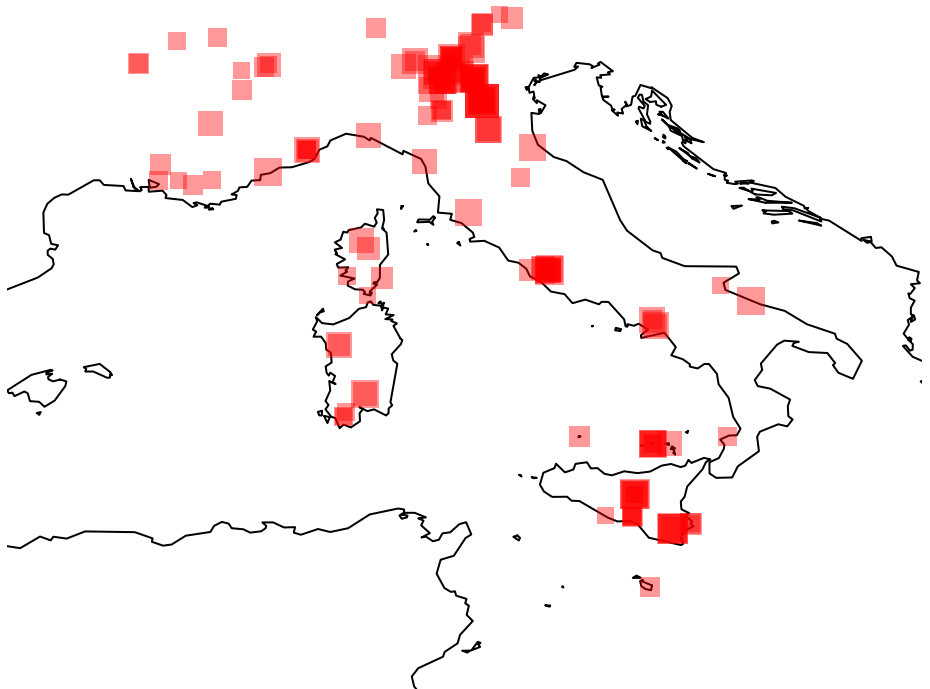

1995 cal. BC

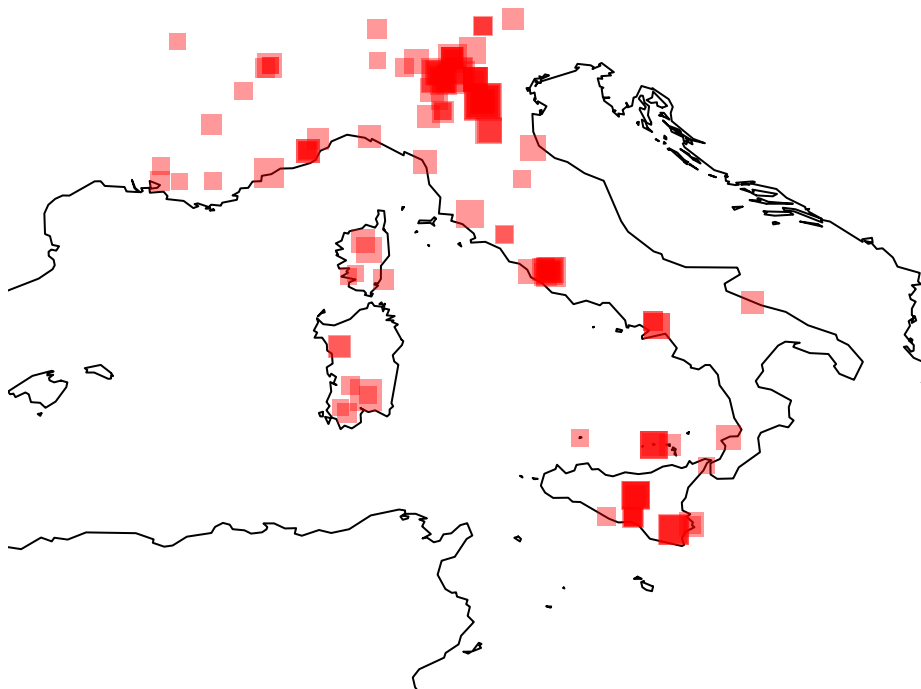

1990 cal. BC

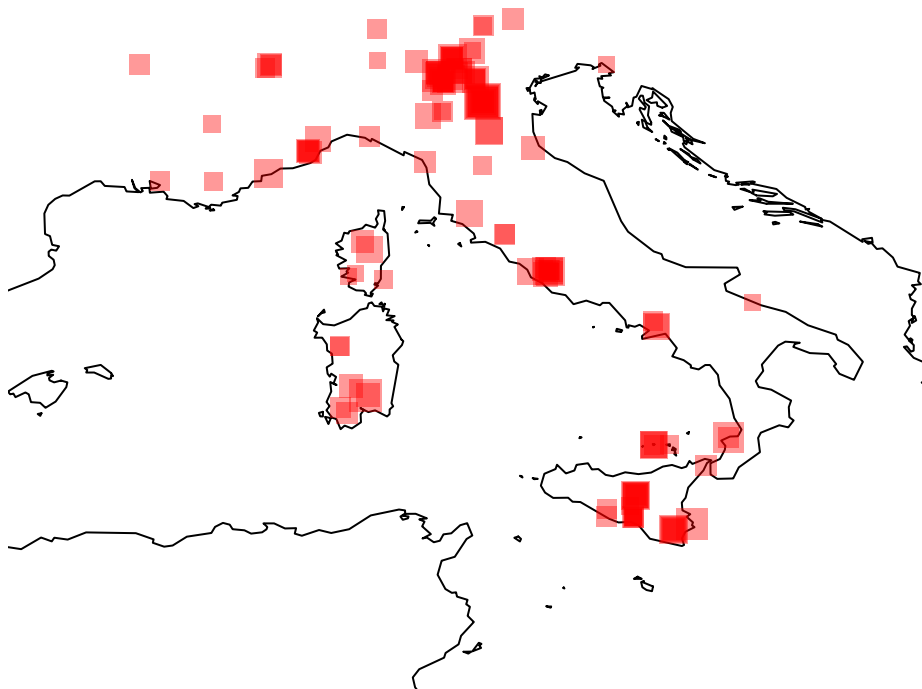

1985 cal. BC

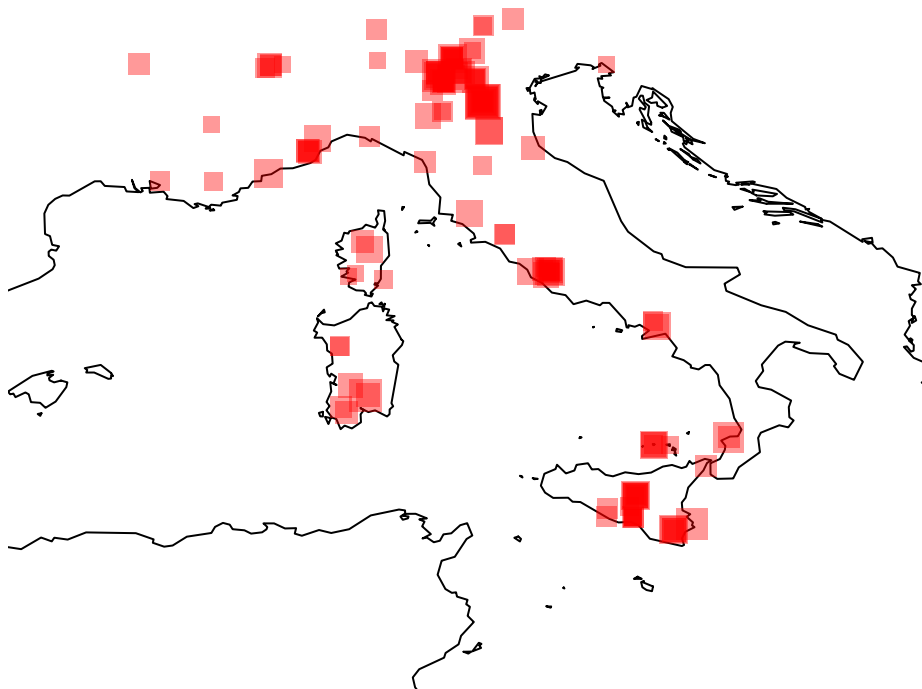

1980 cal. BC

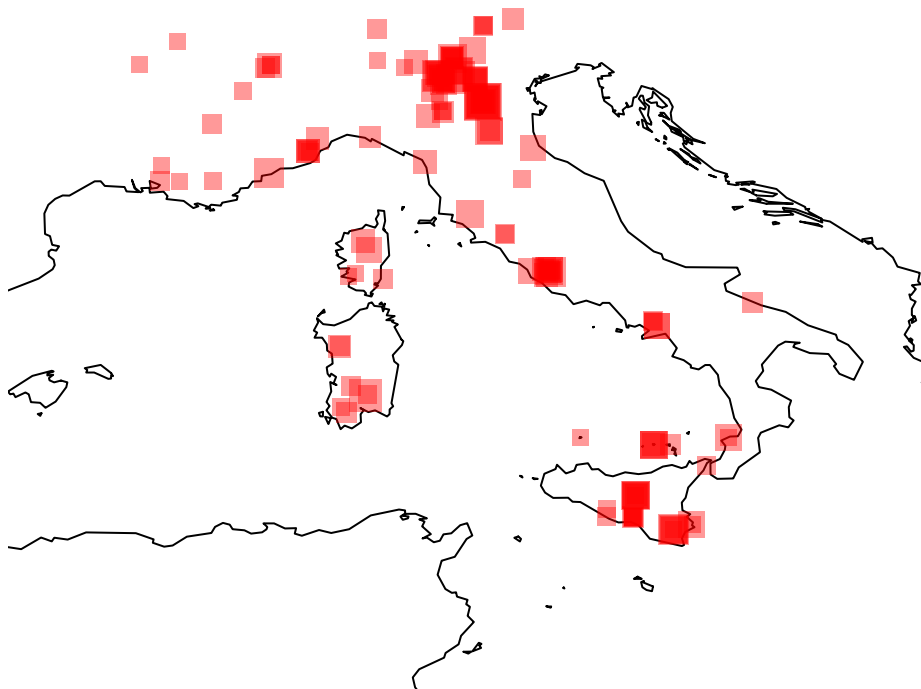

1975 cal. BC

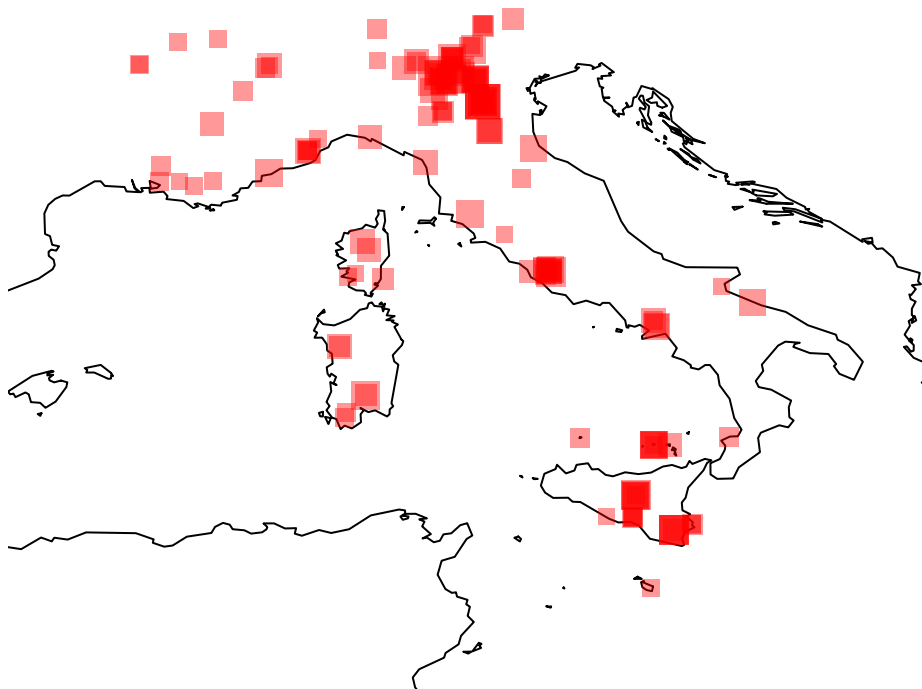

1970 cal. BC

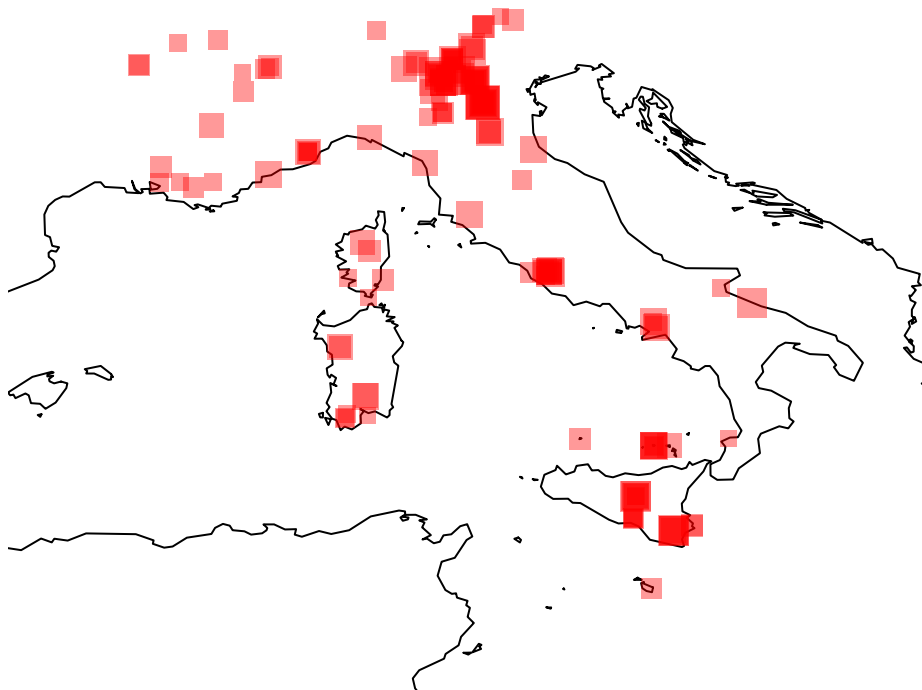





1960 cal. BC

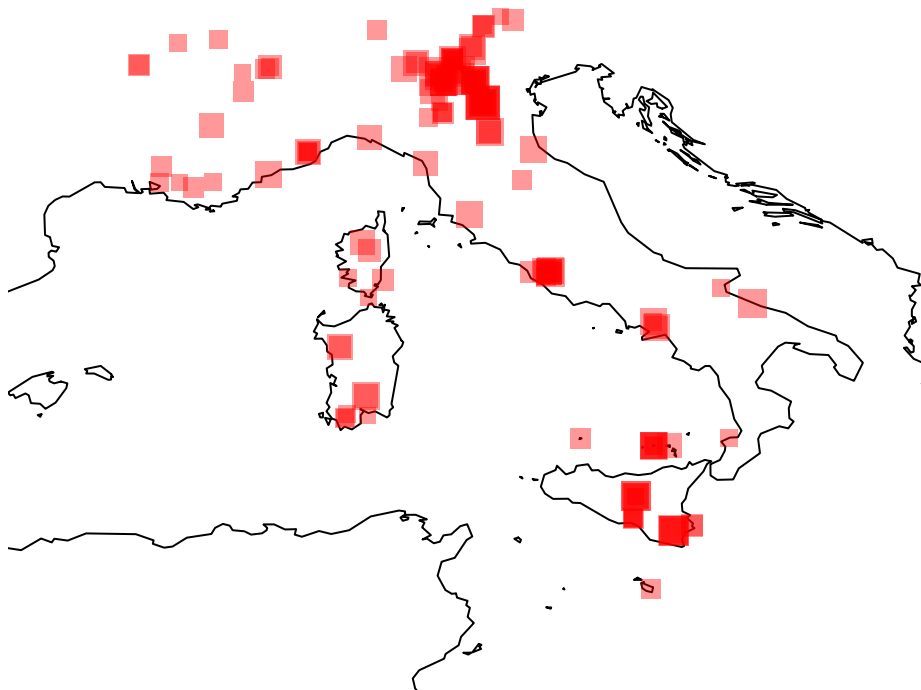



1950 cal. BC

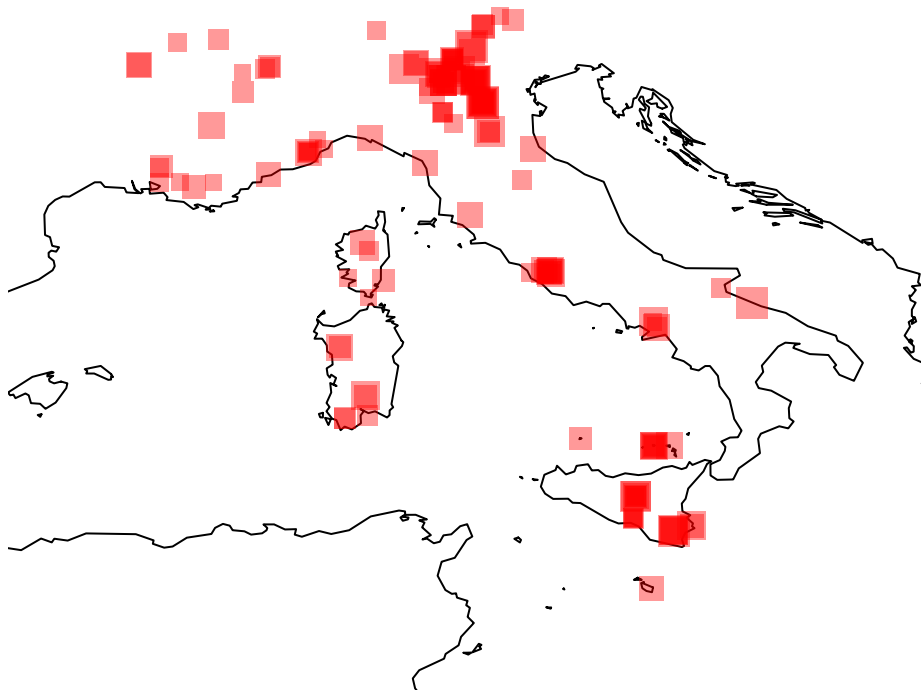

1945 cal. BC

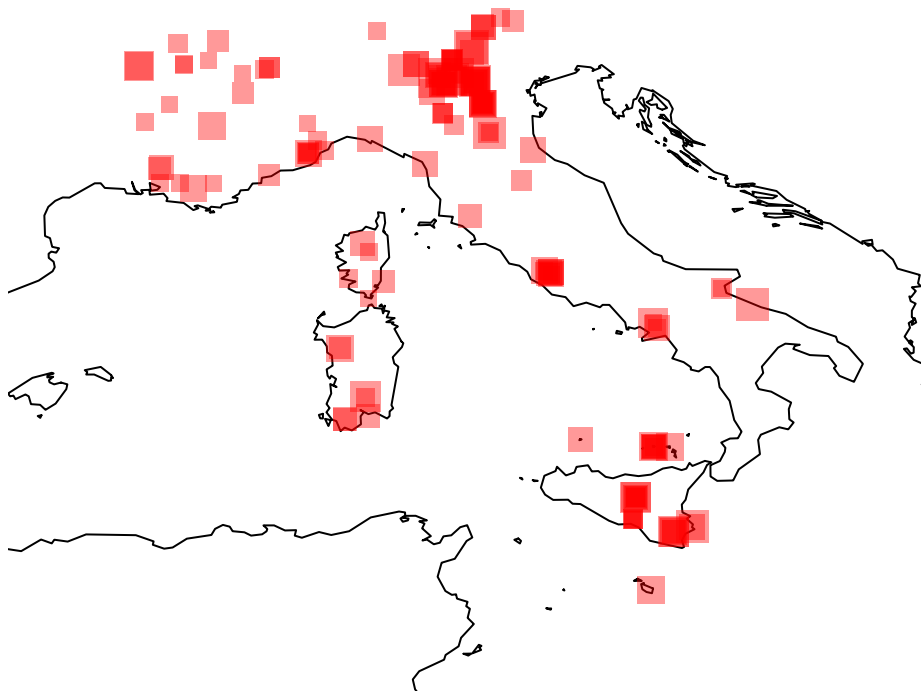

1940 cal. BC

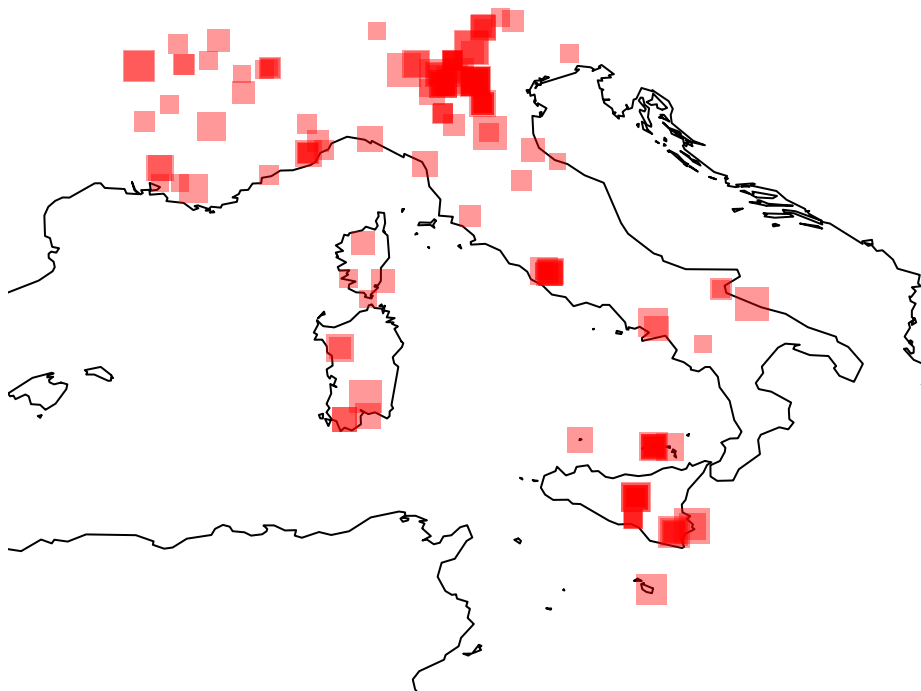

1935 cal. BC

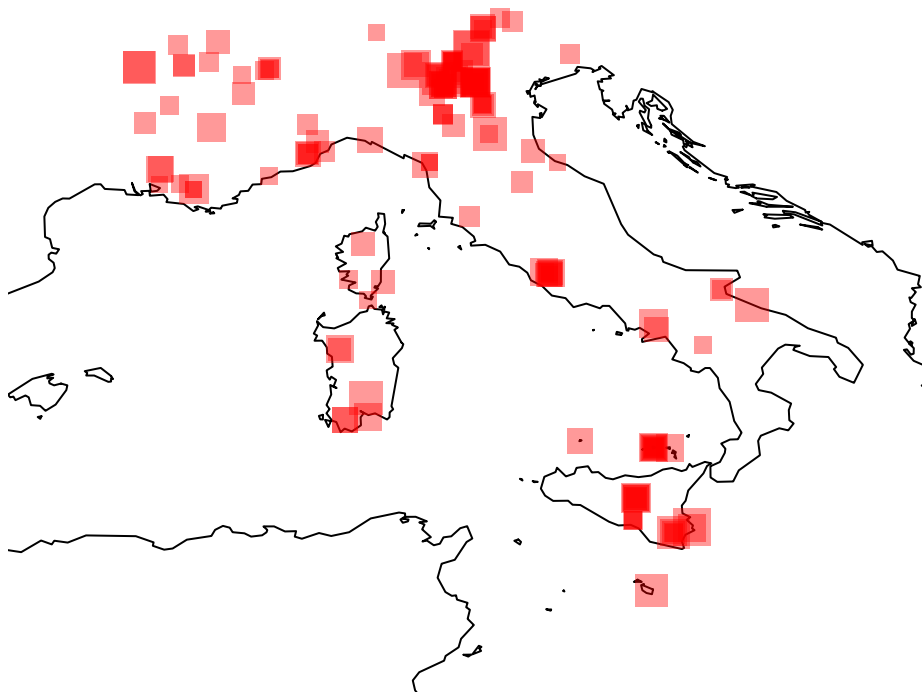

1930 cal. BC

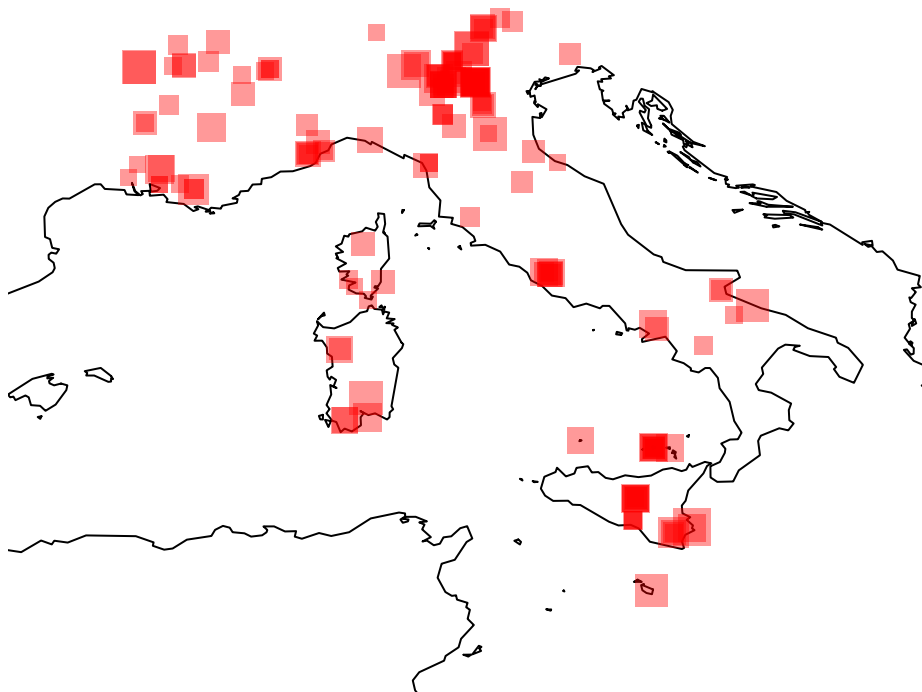



1925 cal. BC

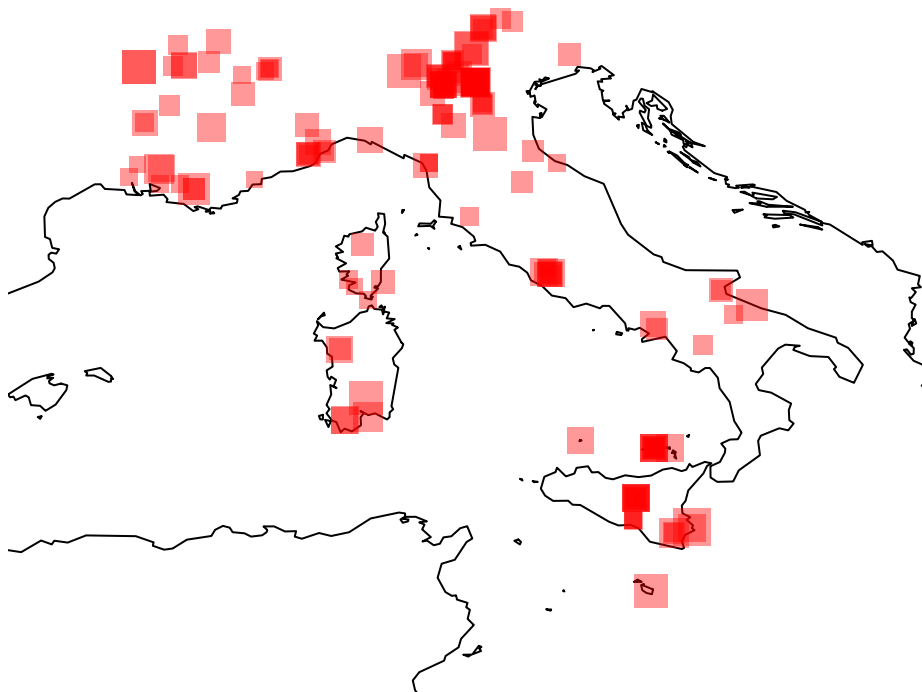

1920 cal. BC

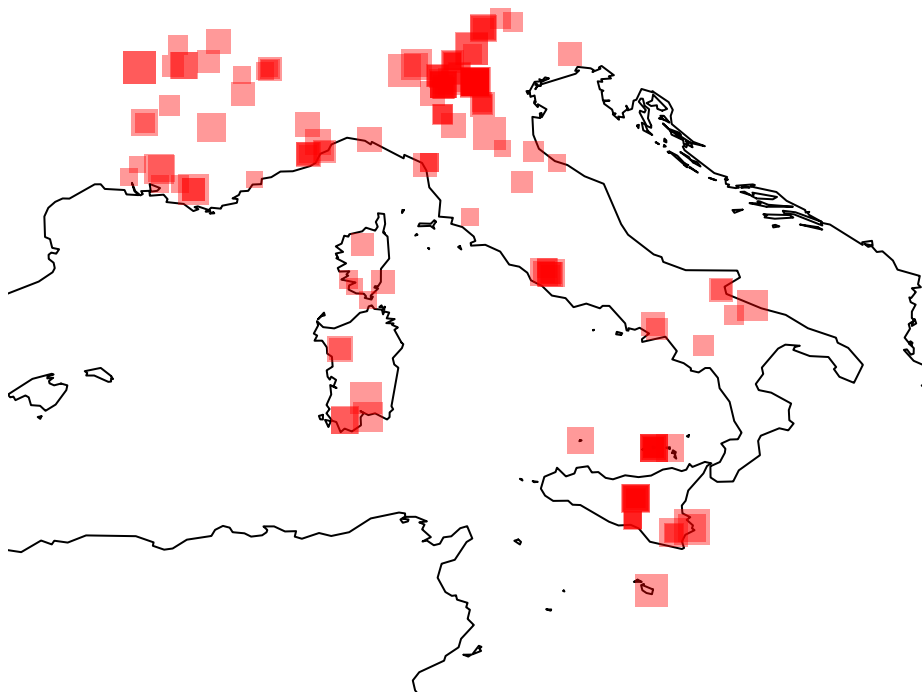

1915 cal. BC

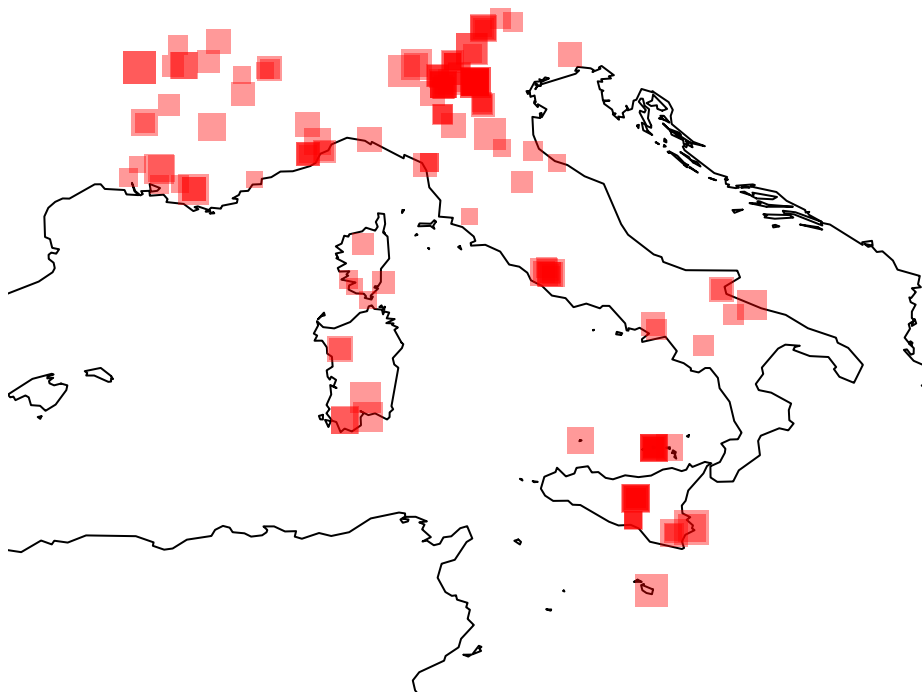

1910 cal. BC

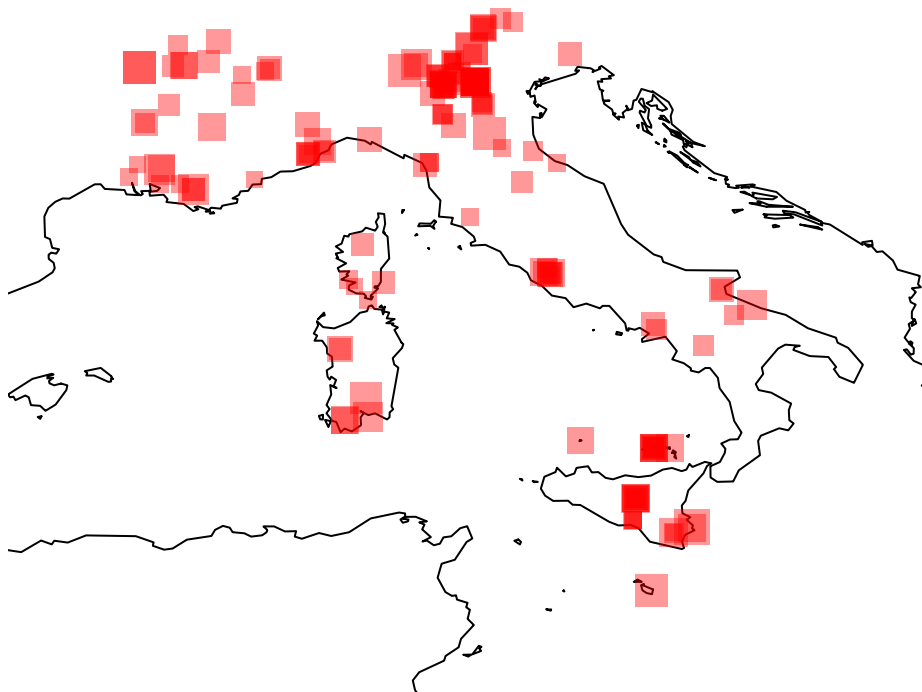

1905 cal. BC

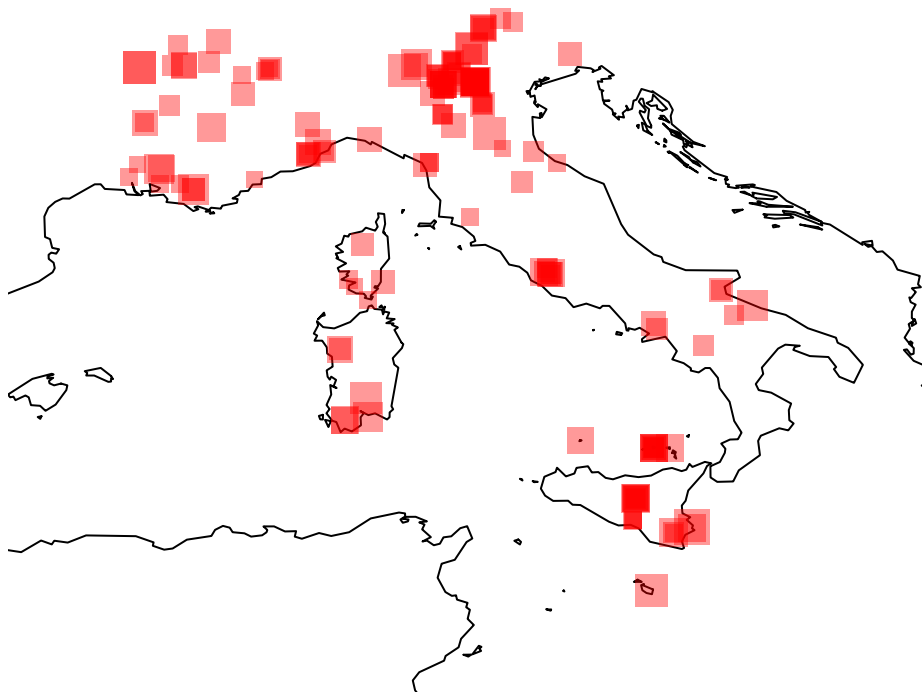

1900 cal. BC

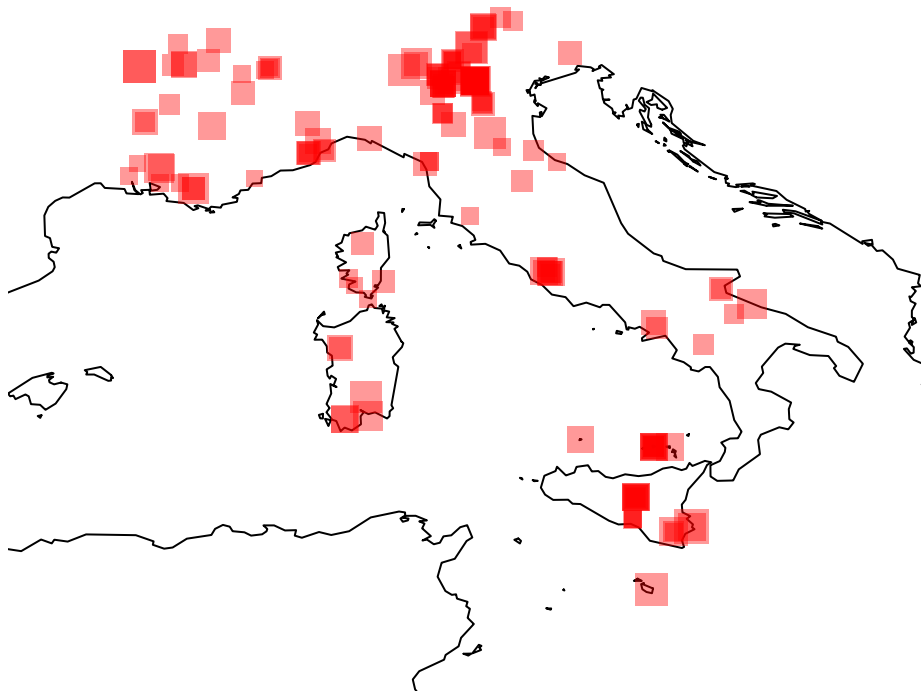

1895 cal. BC

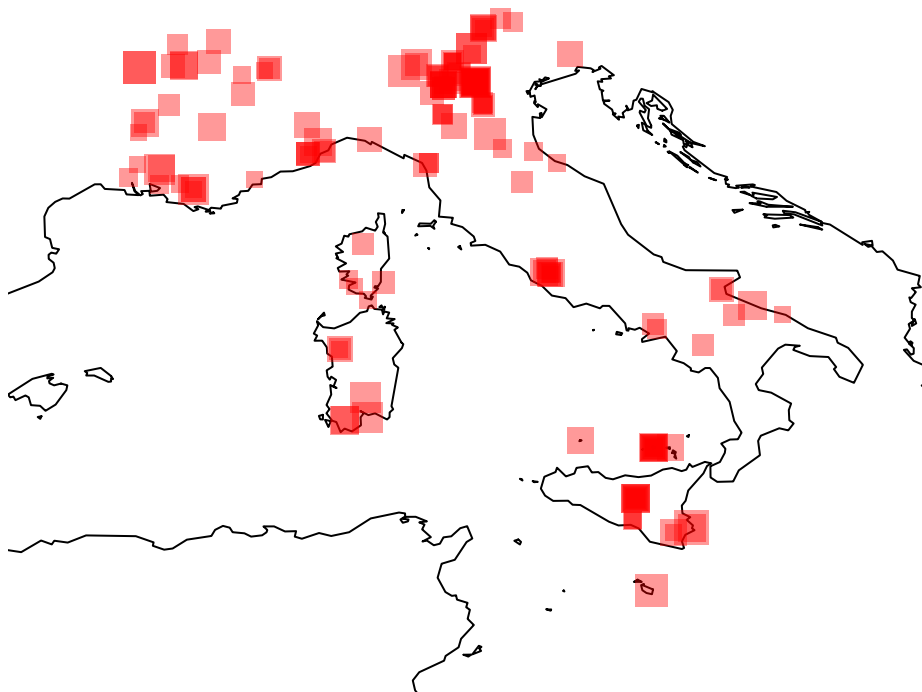

1890 cal. BC

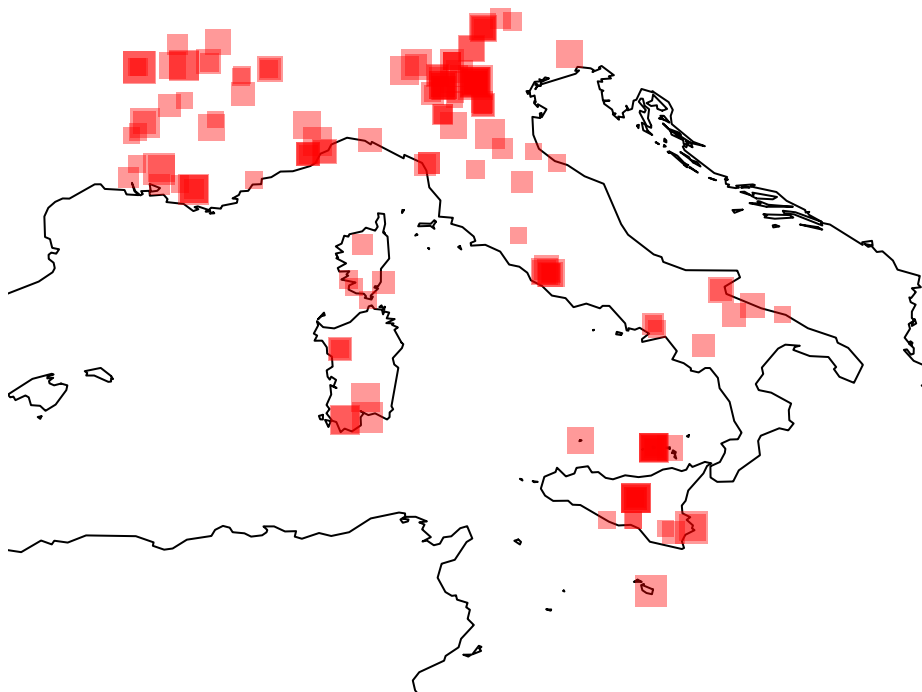



1885 cal. BC

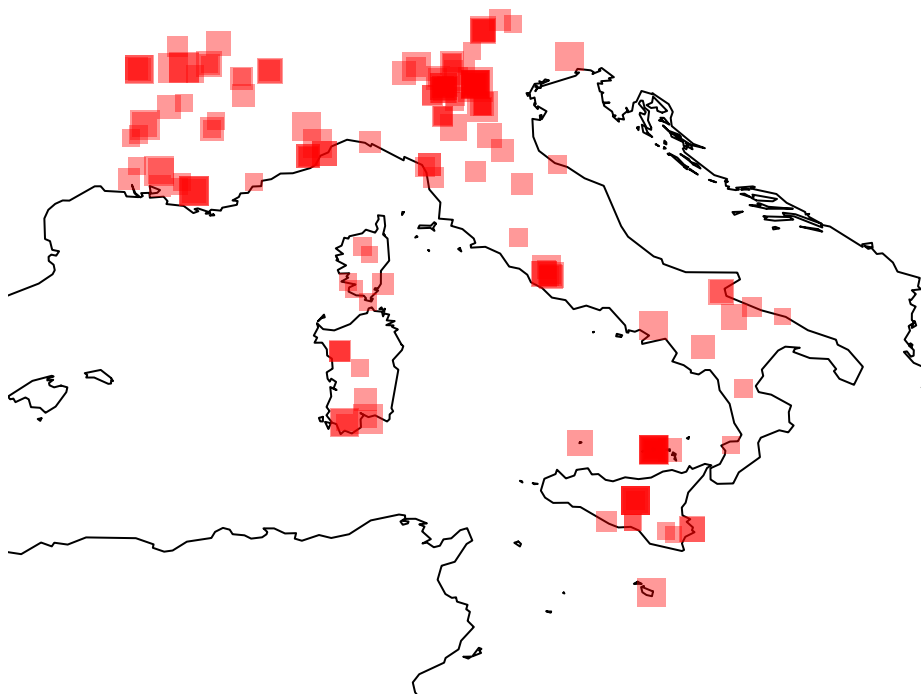

1880 cal. BC

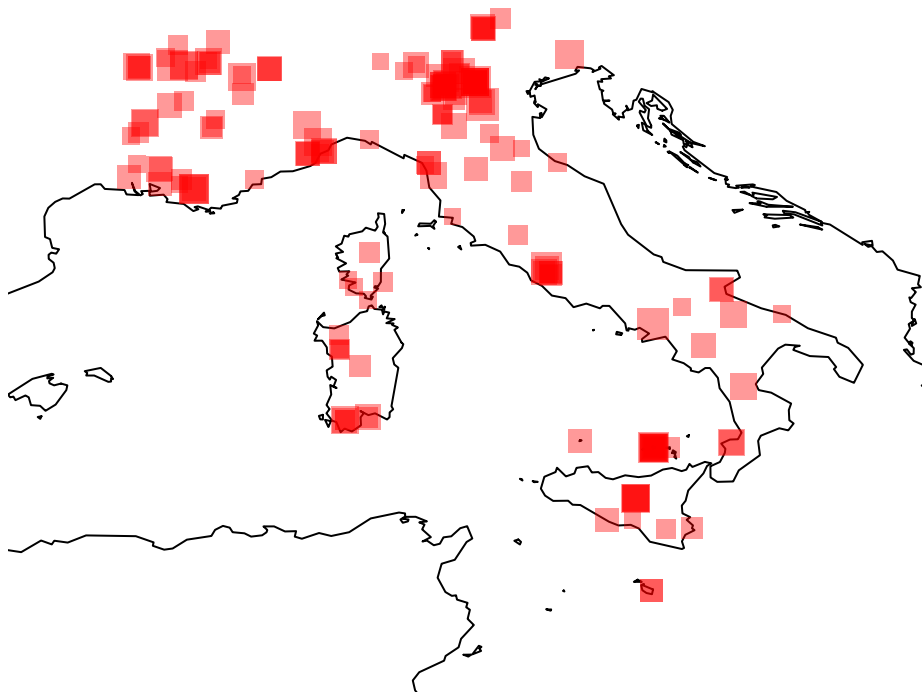

1875 cal. BC

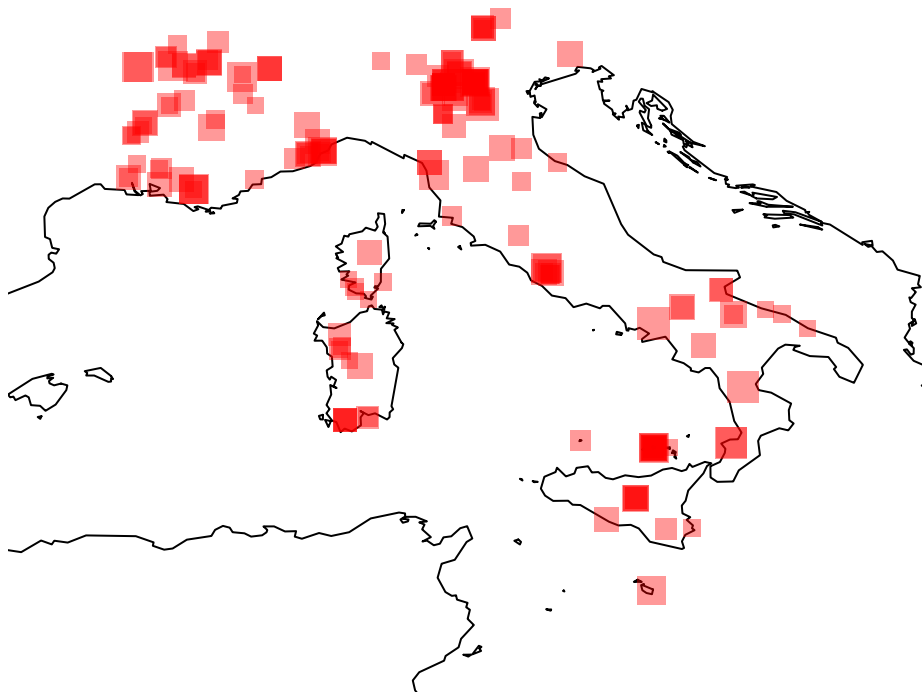

1870 cal. BC

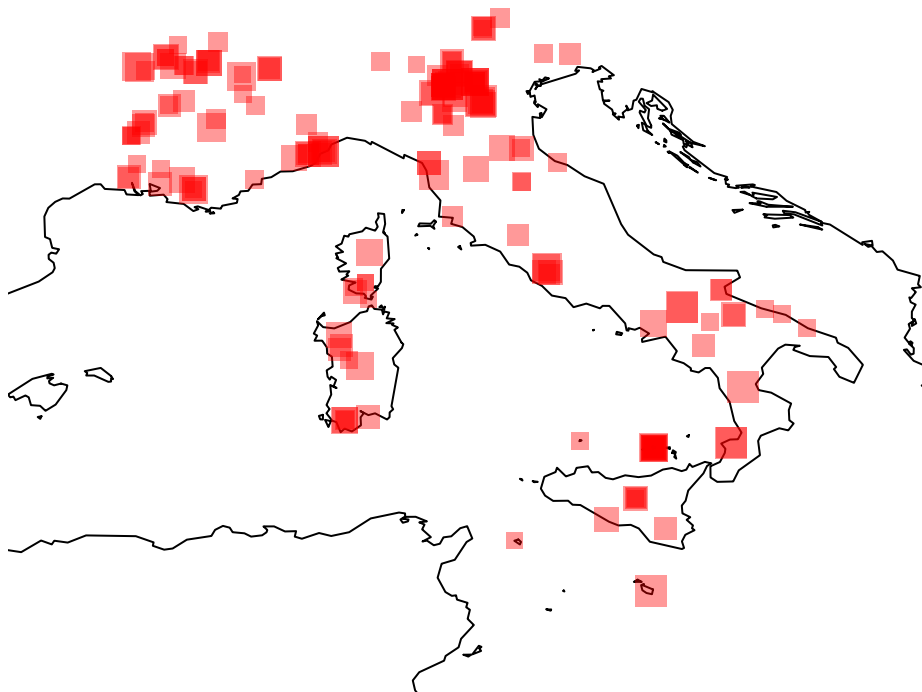

1865 cal. BC

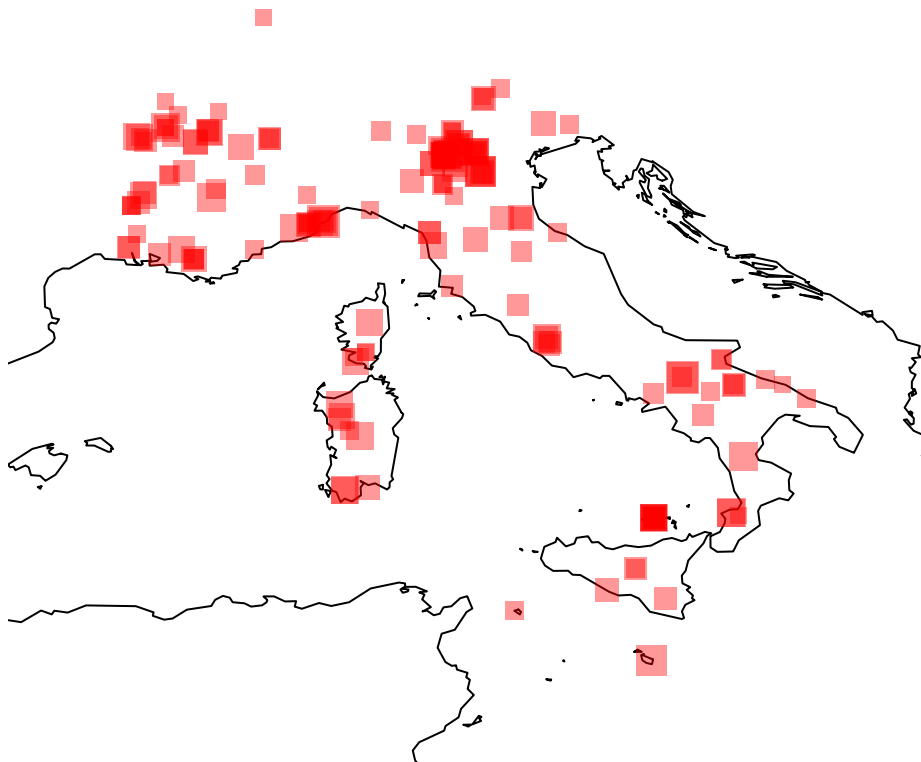

1860 cal. BC

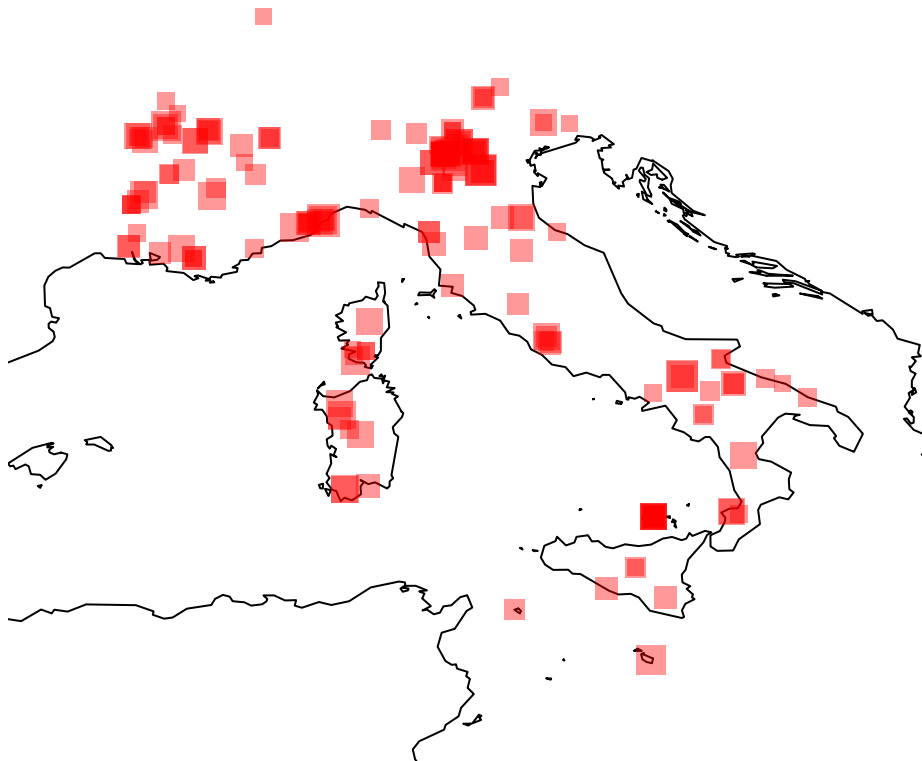

1855 cal. BC

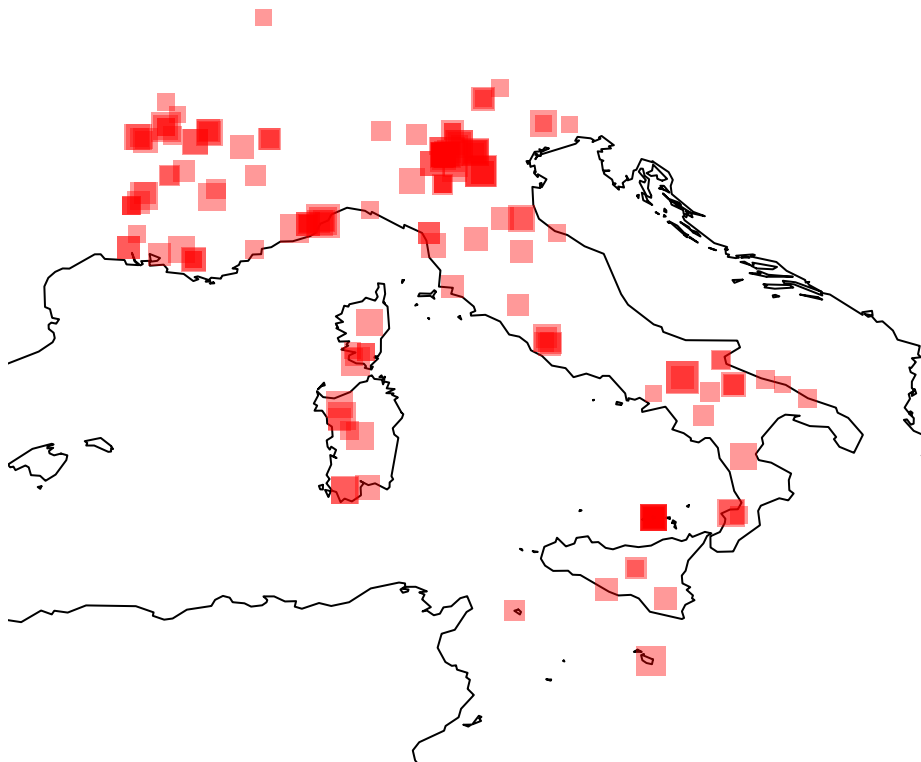

1850 cal. BC

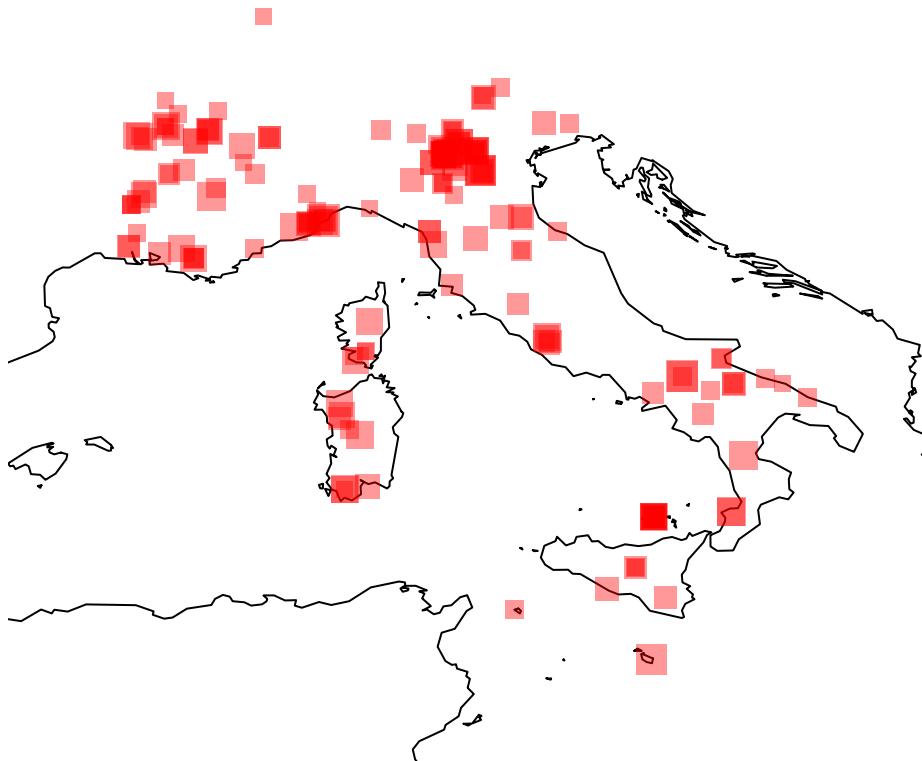



1845 cal. BC

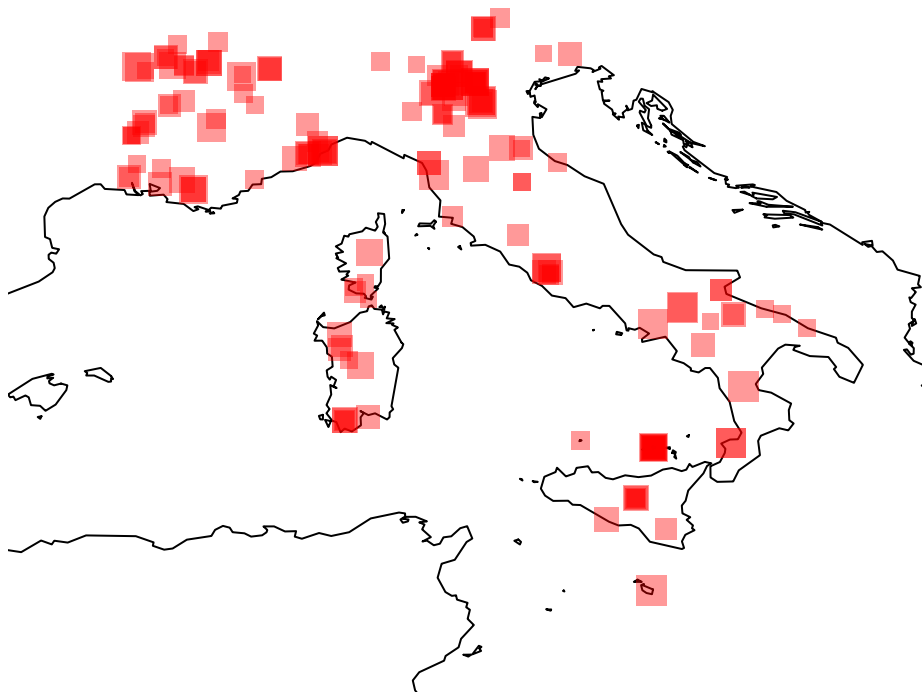

1840 cal. BC

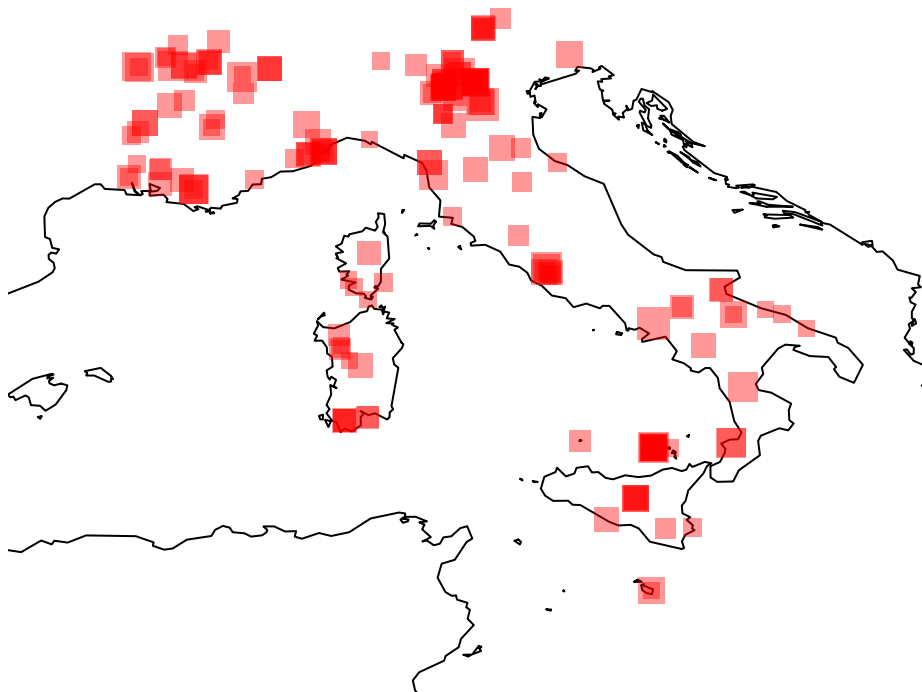

1835 cal. BC

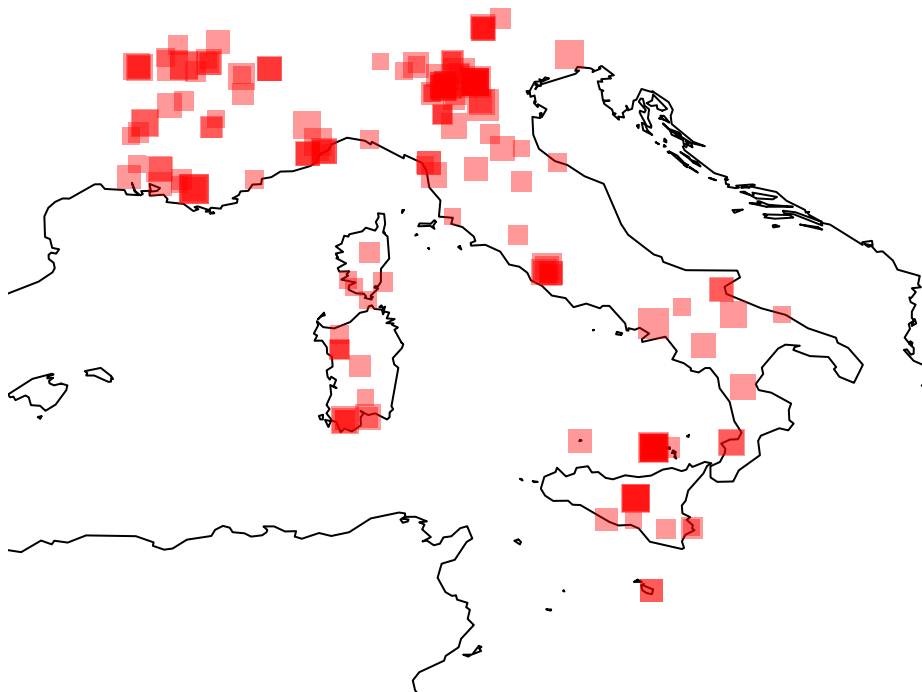

1830 cal. BC

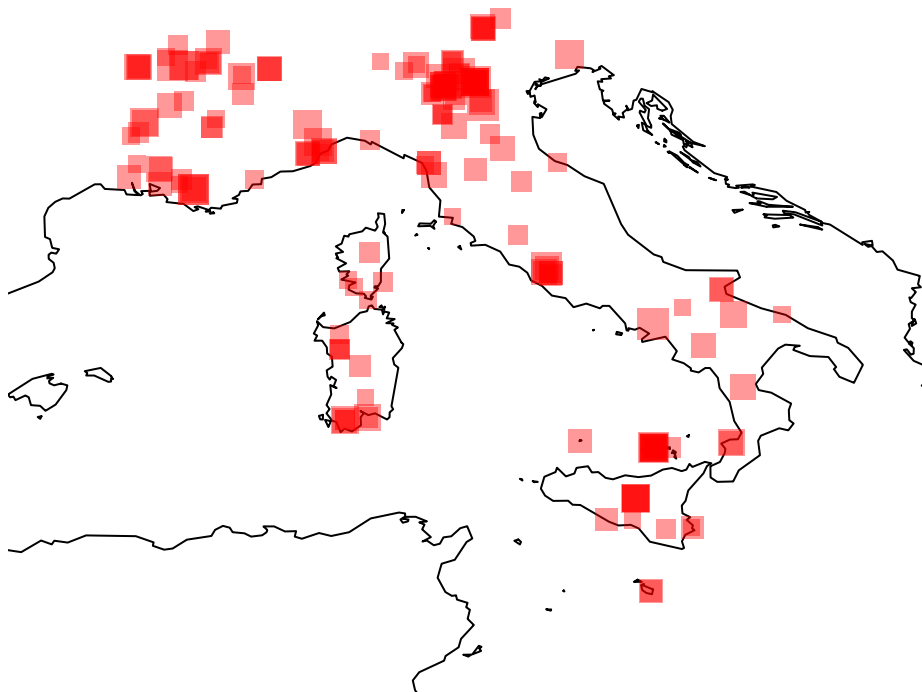

1825 cal. BC

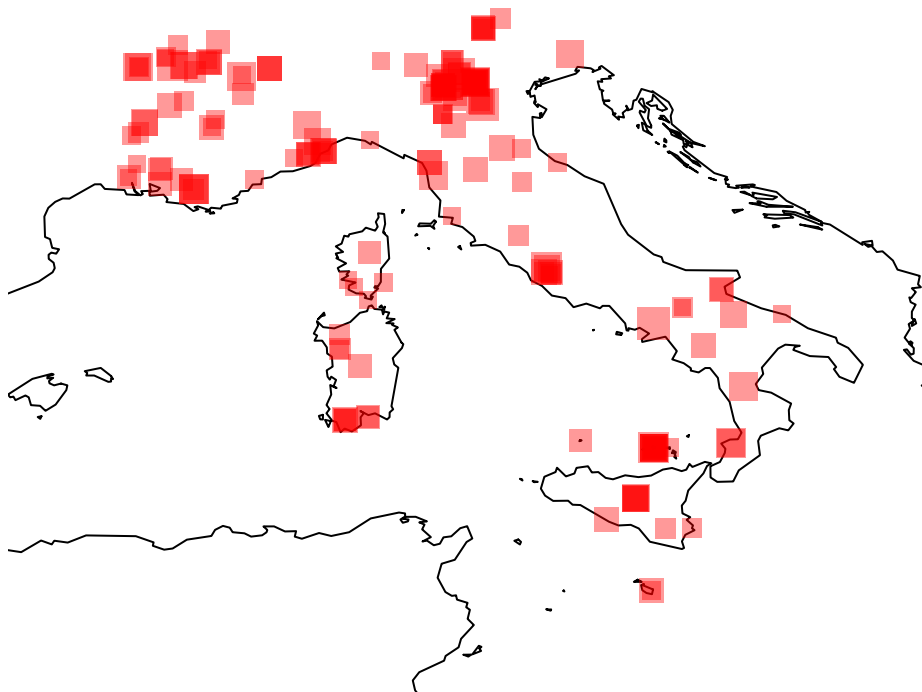

1820 cal. BC

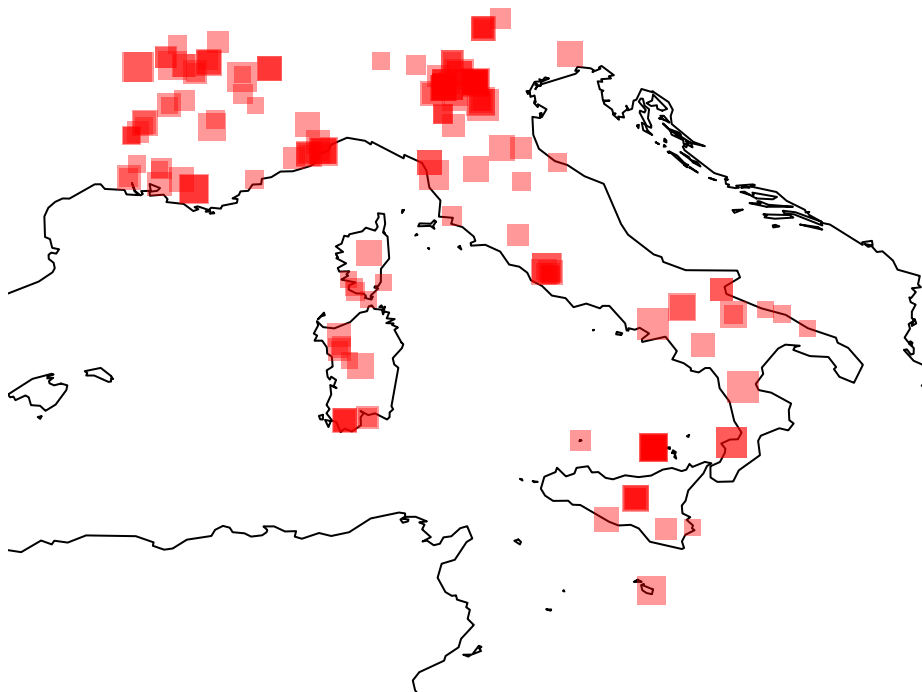

1815 cal. BC

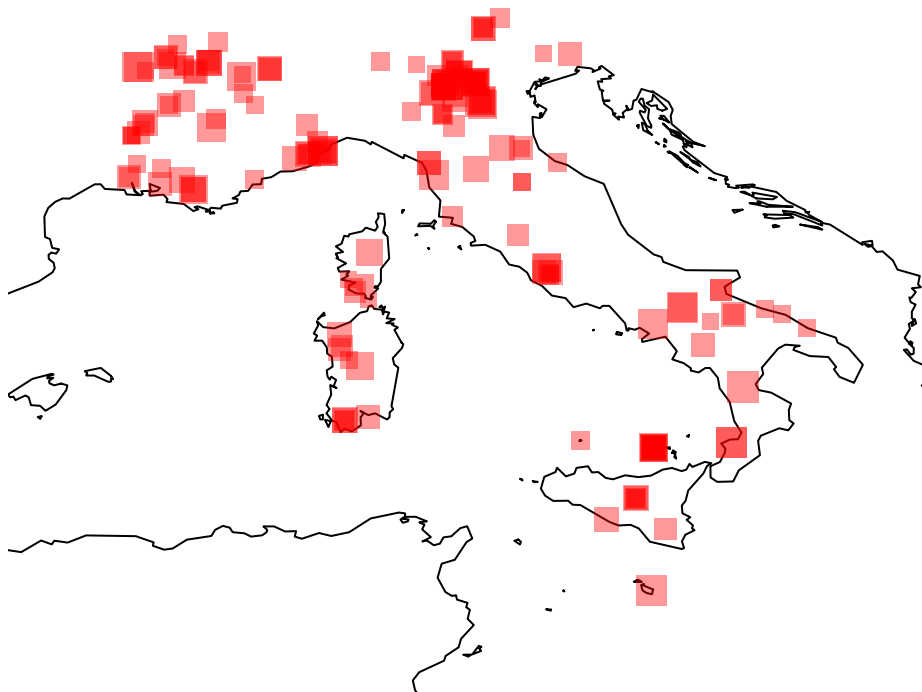

1810 cal. BC

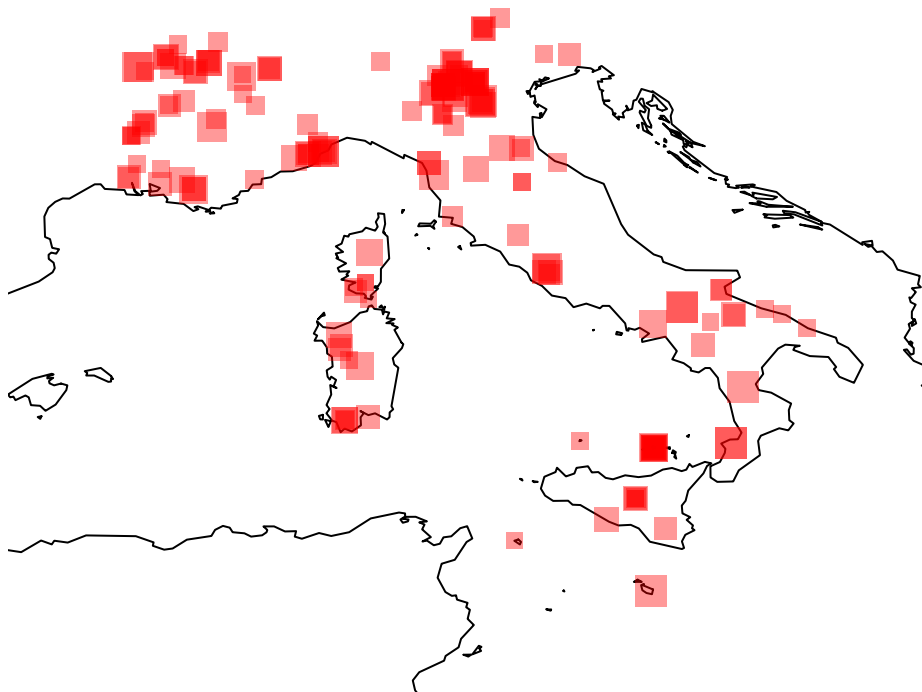



1805 cal. BC

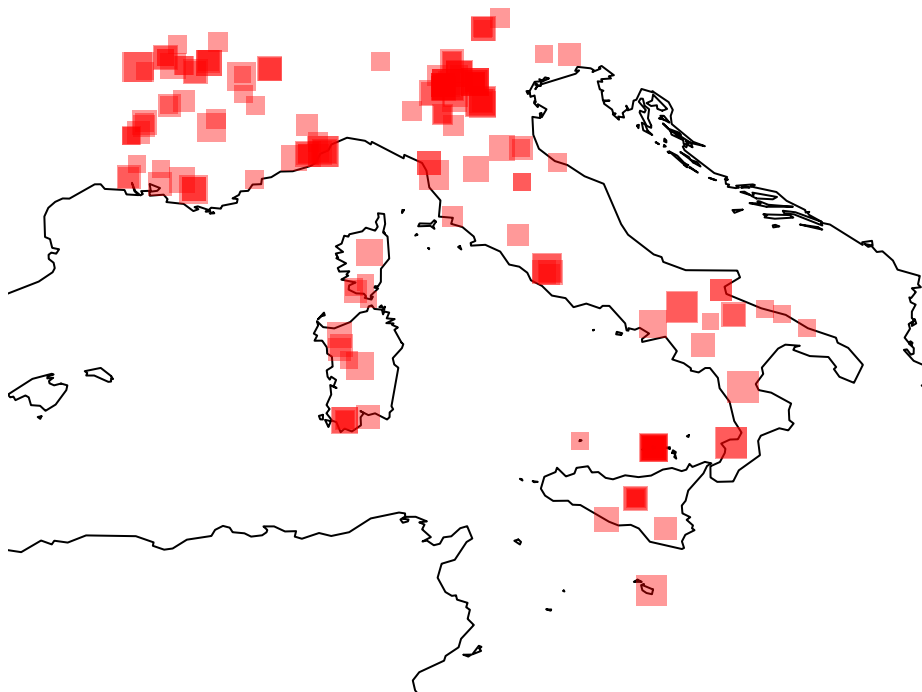

1800 cal. BC

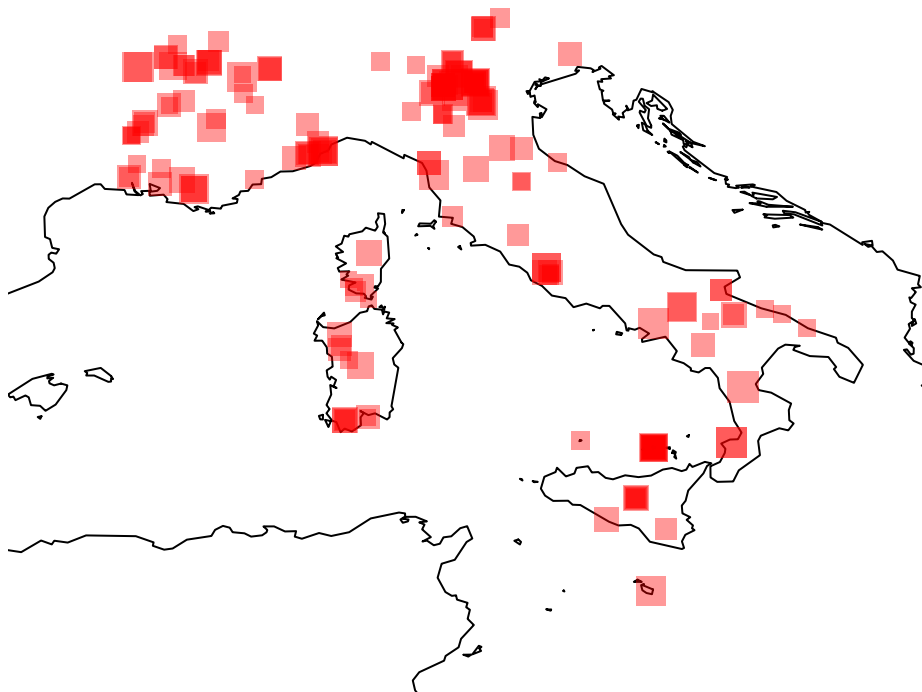

1795 cal. BC

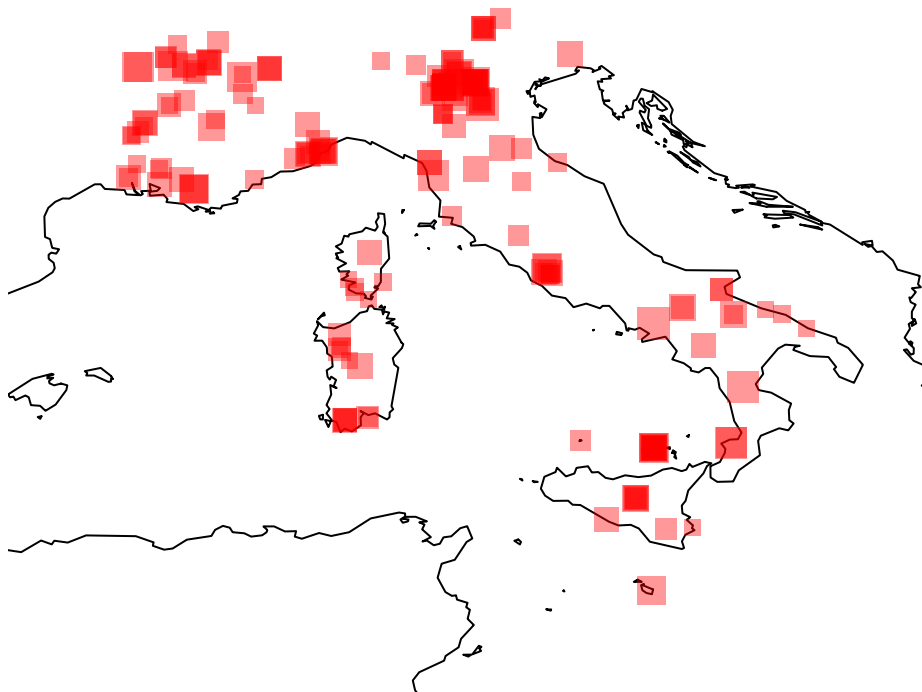

1790 cal. BC

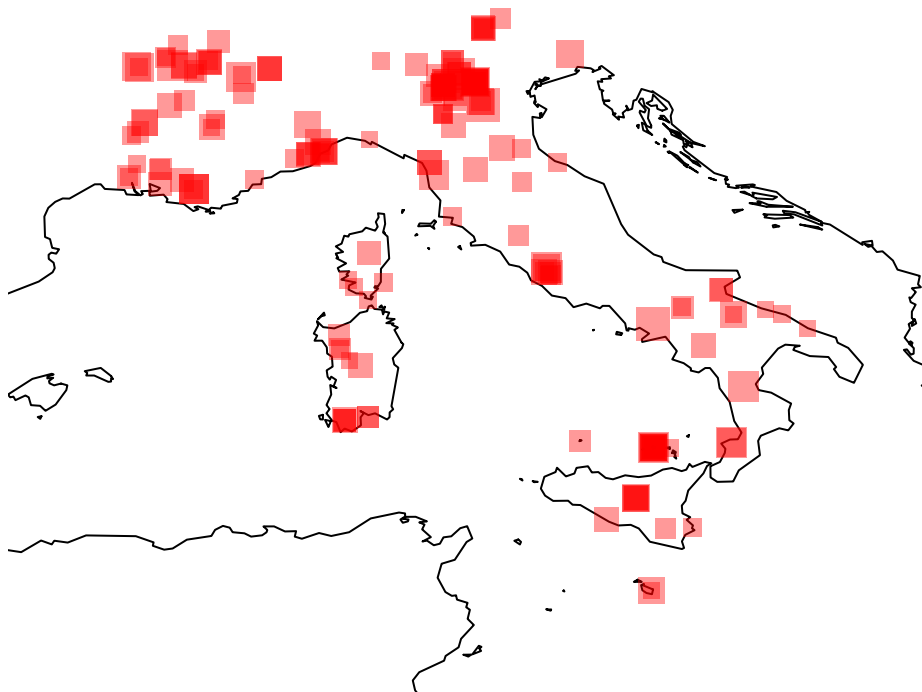

1785 cal. BC

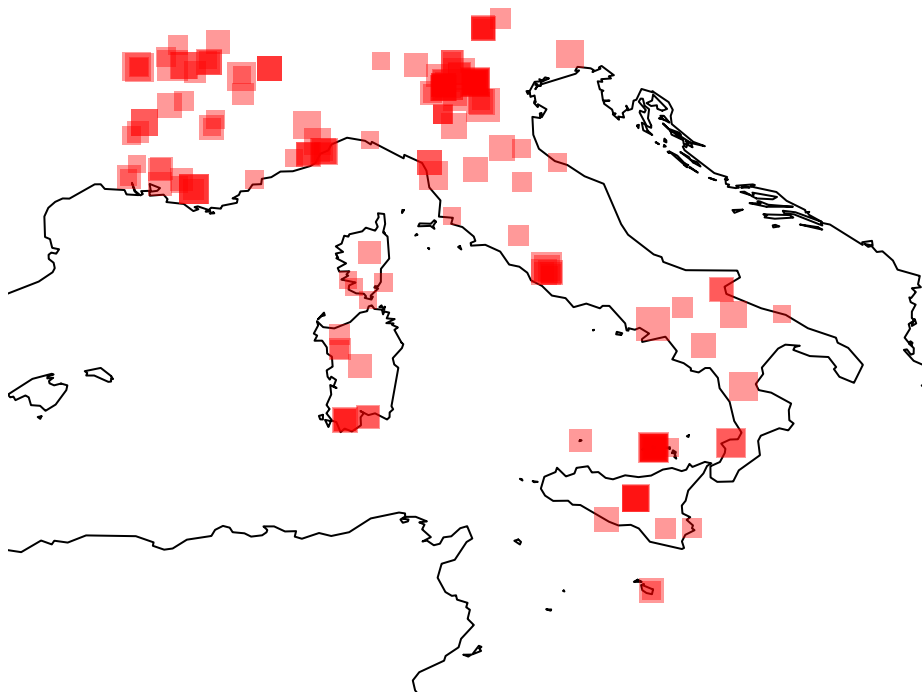

1780 cal. BC



1775 cal. BC

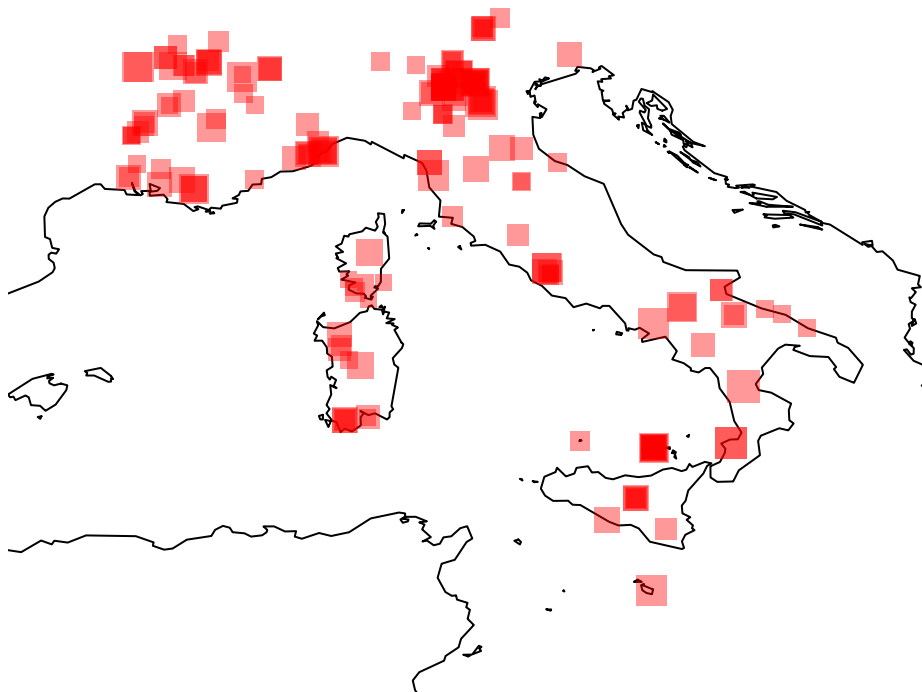

1770 cal. BC

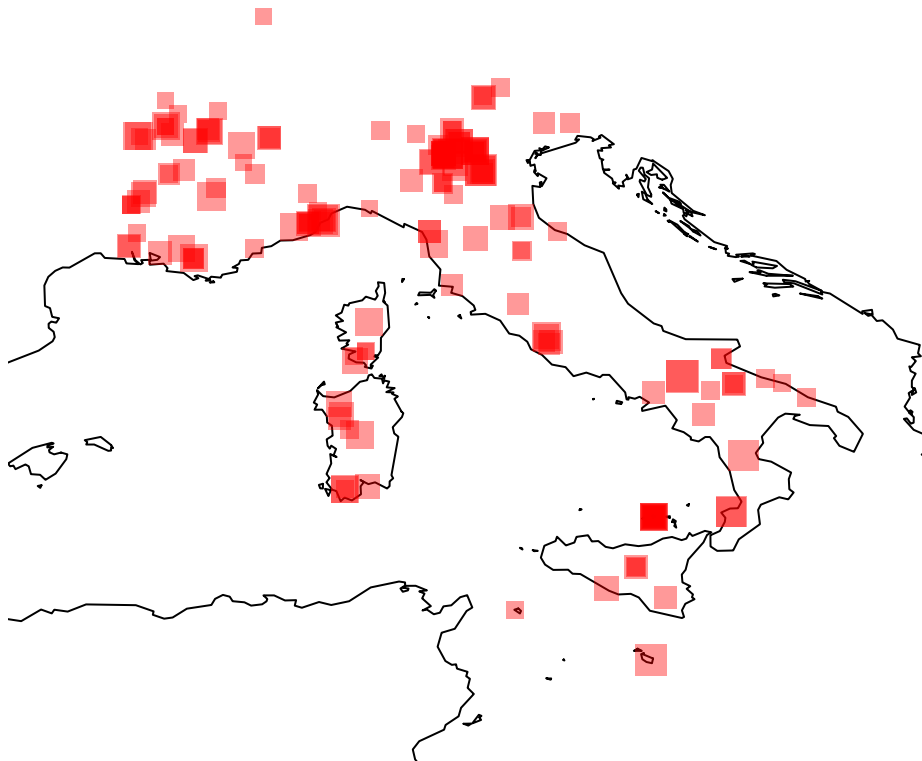



1765 cal. BC

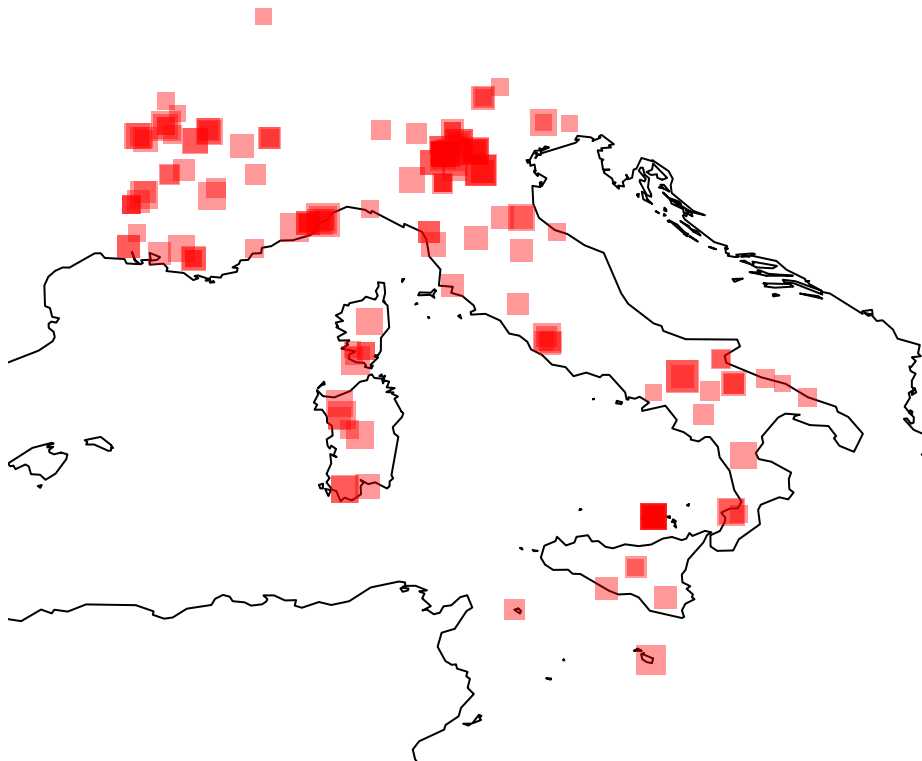

1760 cal. BC

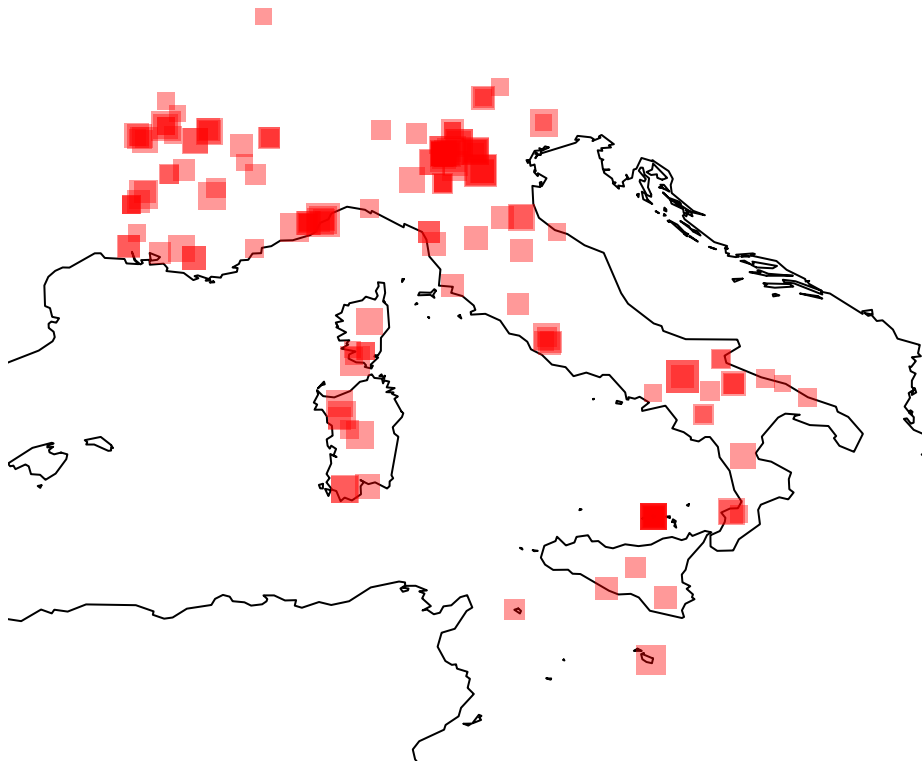

1755 cal. BC

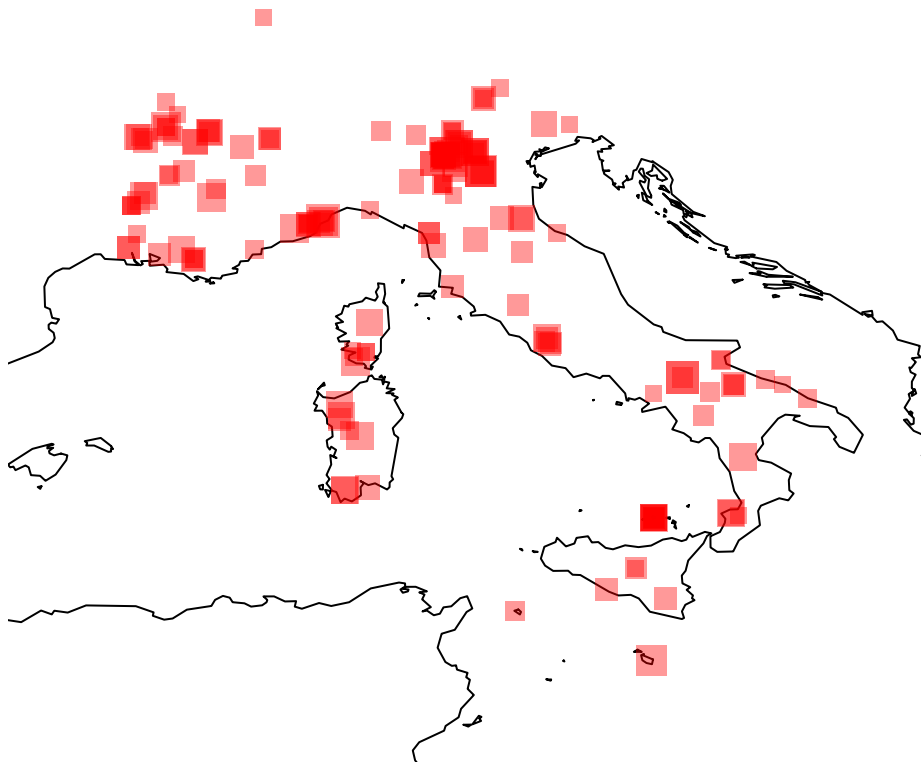

1750 cal. BC

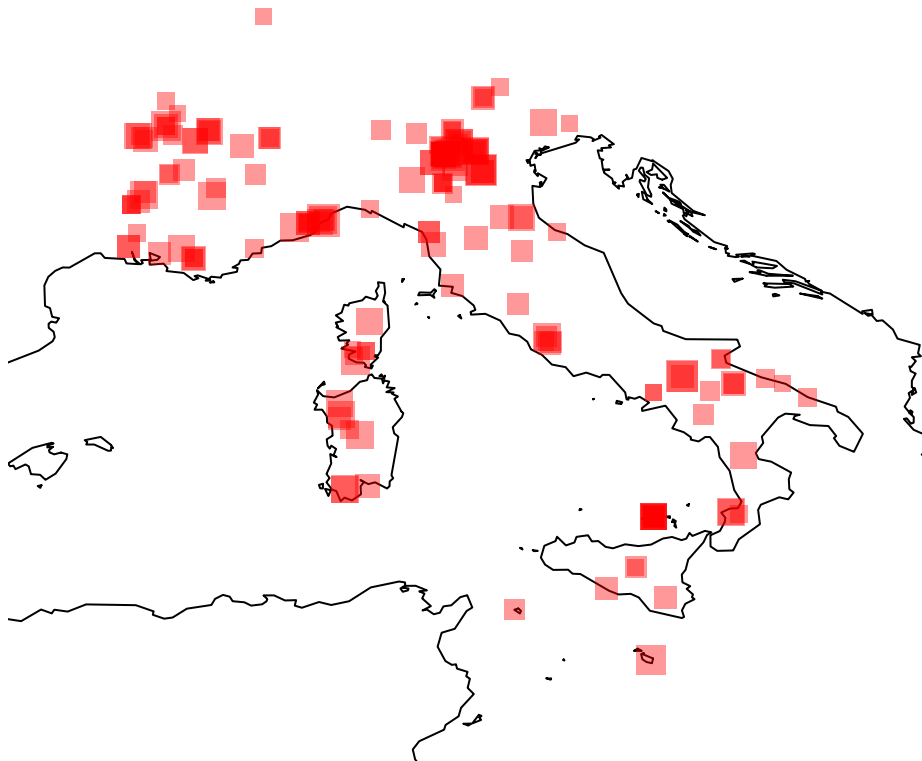

1745 cal. BC

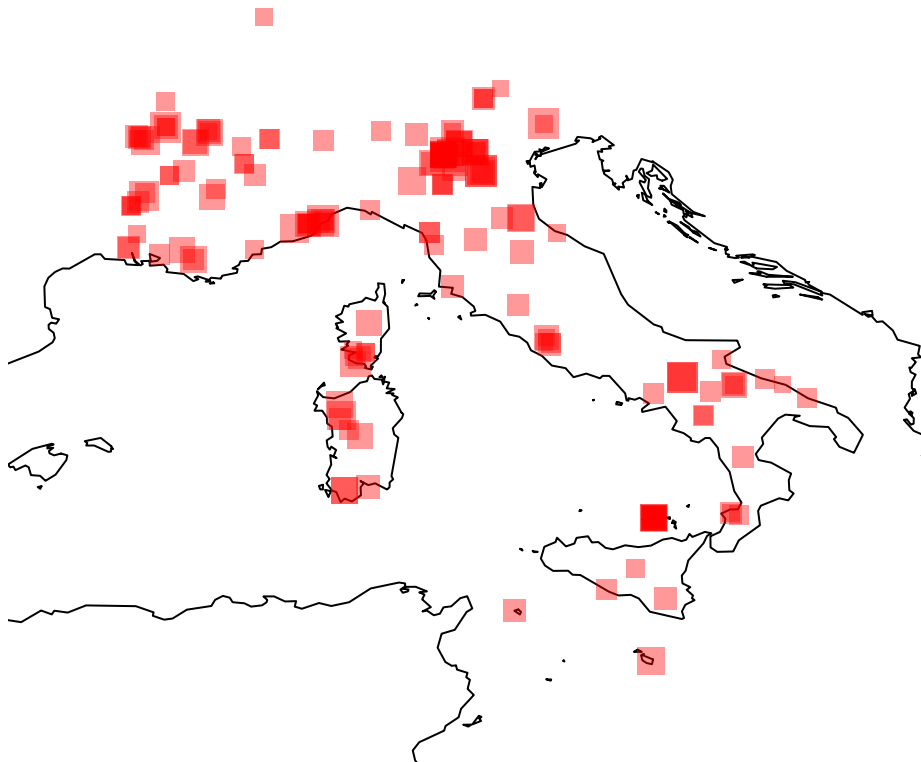

1740 cal. BC

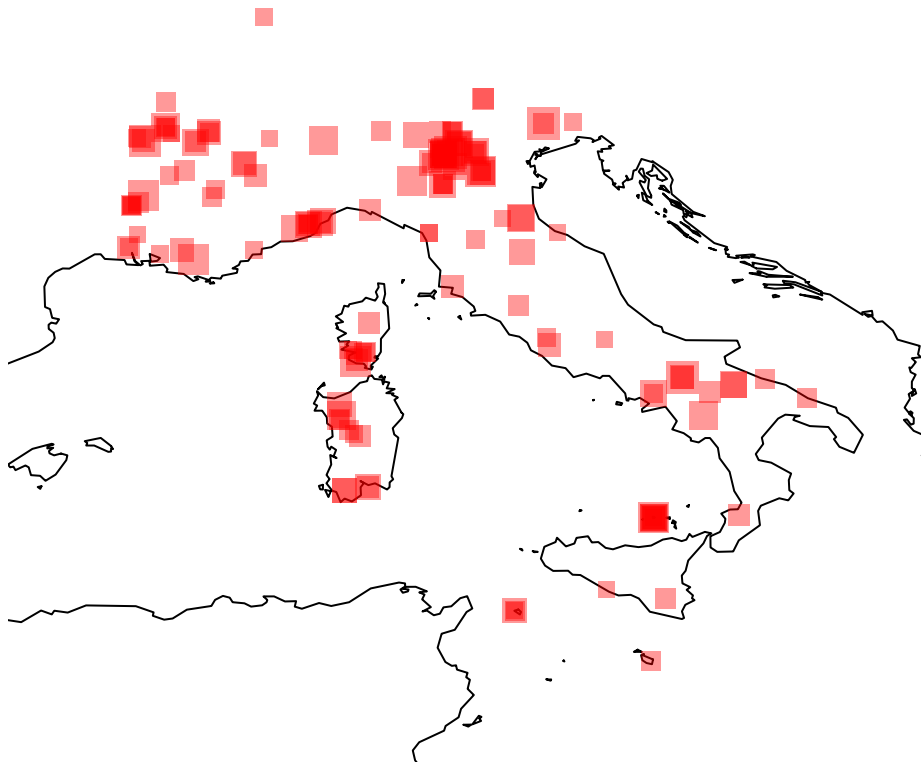

1735 cal. BC

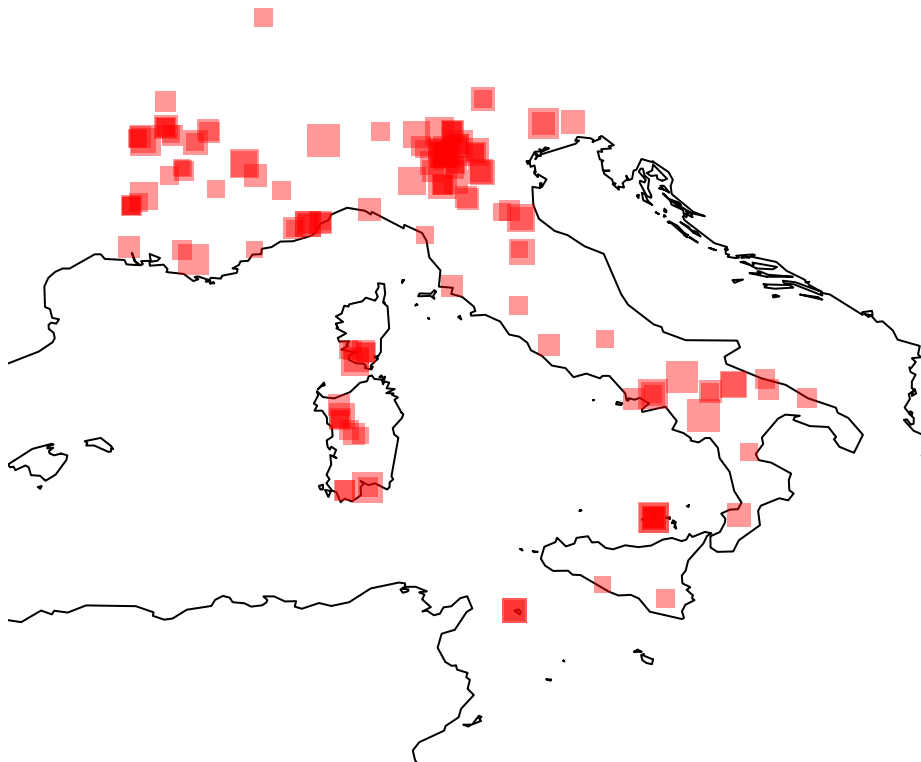

1730 cal. BC

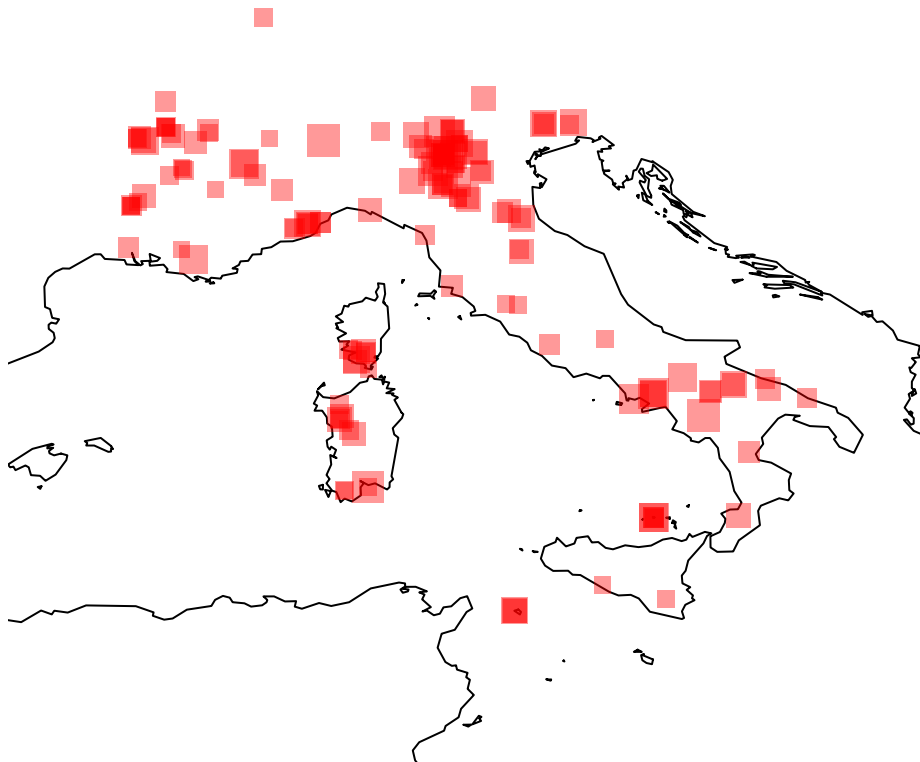



1725 cal. BC

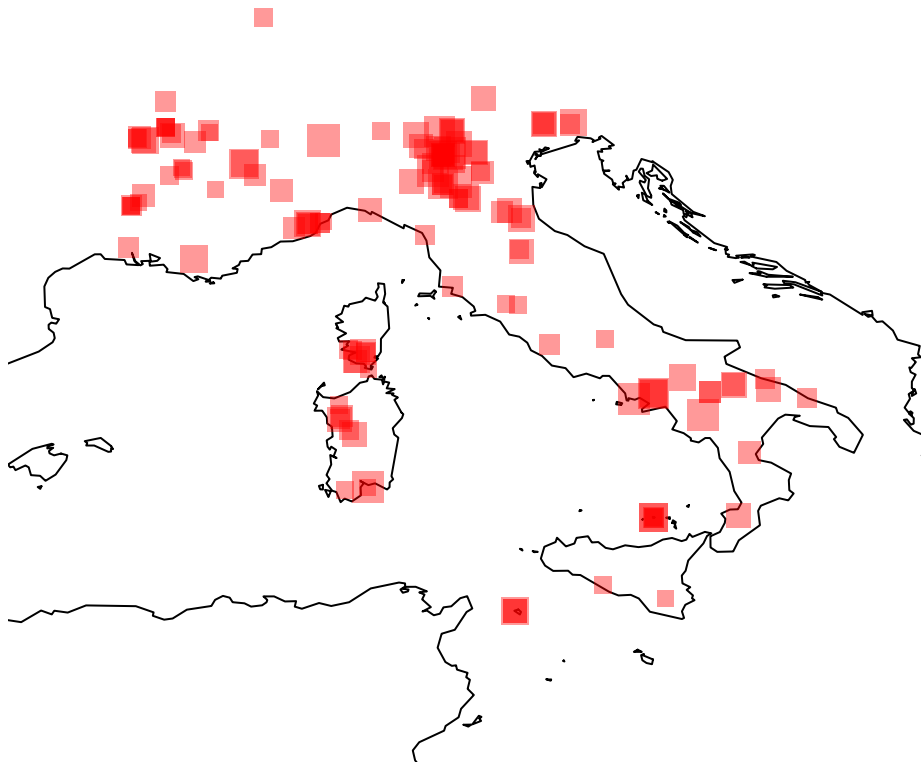

1720 cal. BC

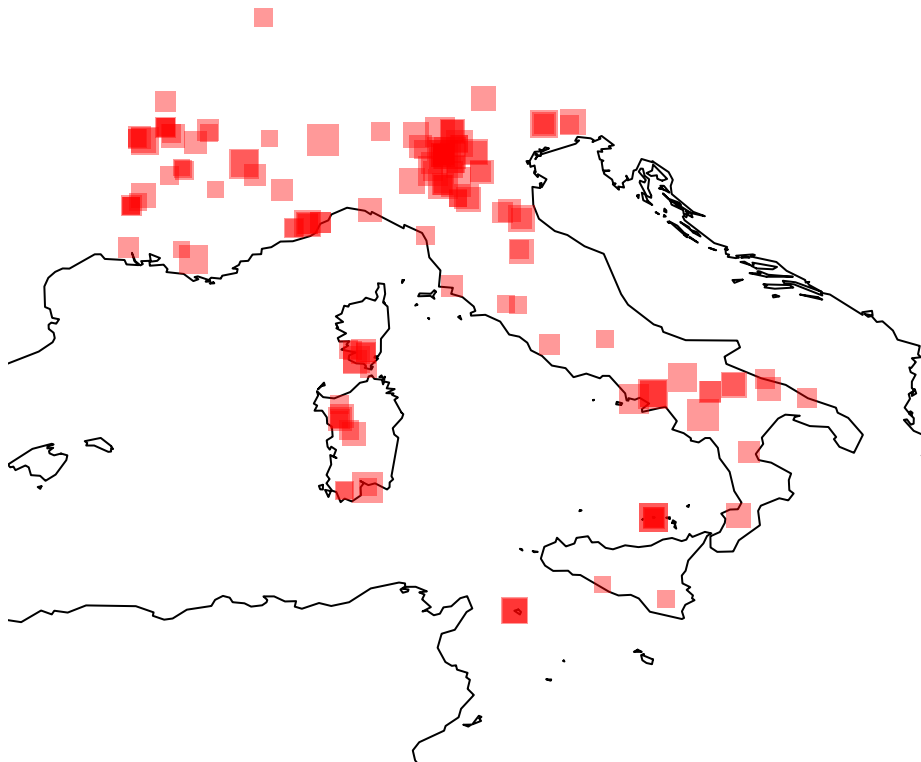

1715 cal. BC

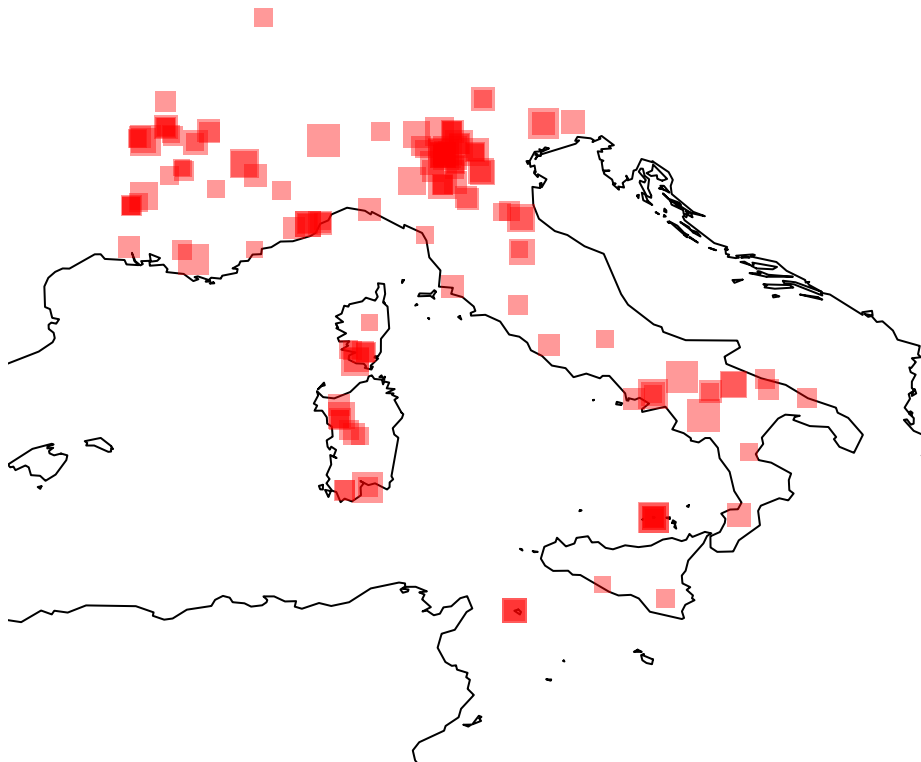

1710 cal. BC

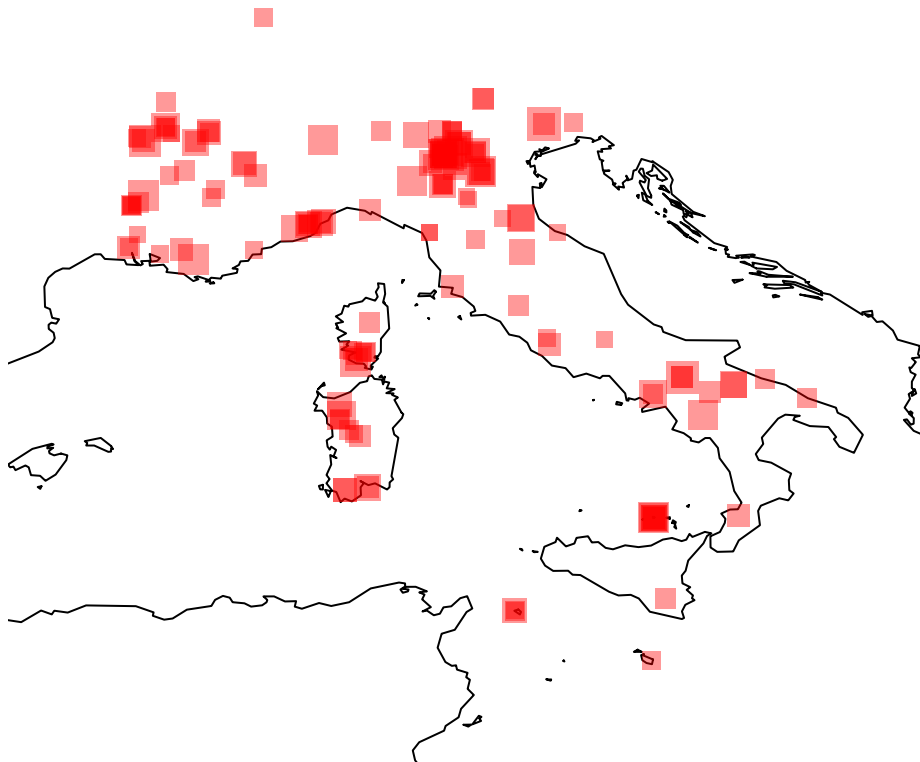

1705 cal. BC

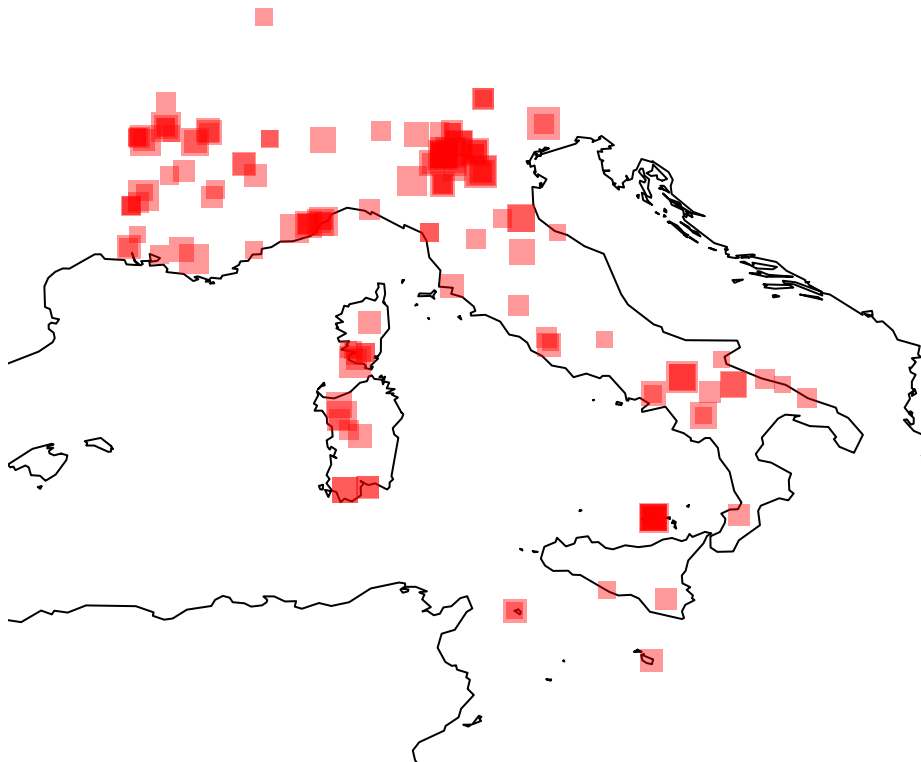

1700 cal. BC

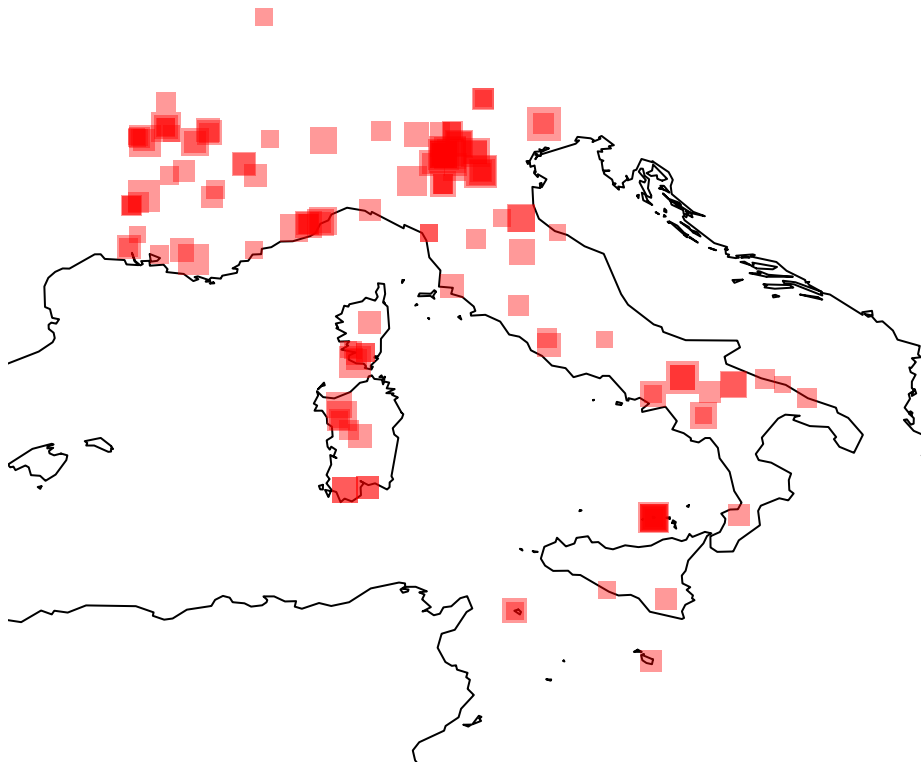

1695 cal. BC

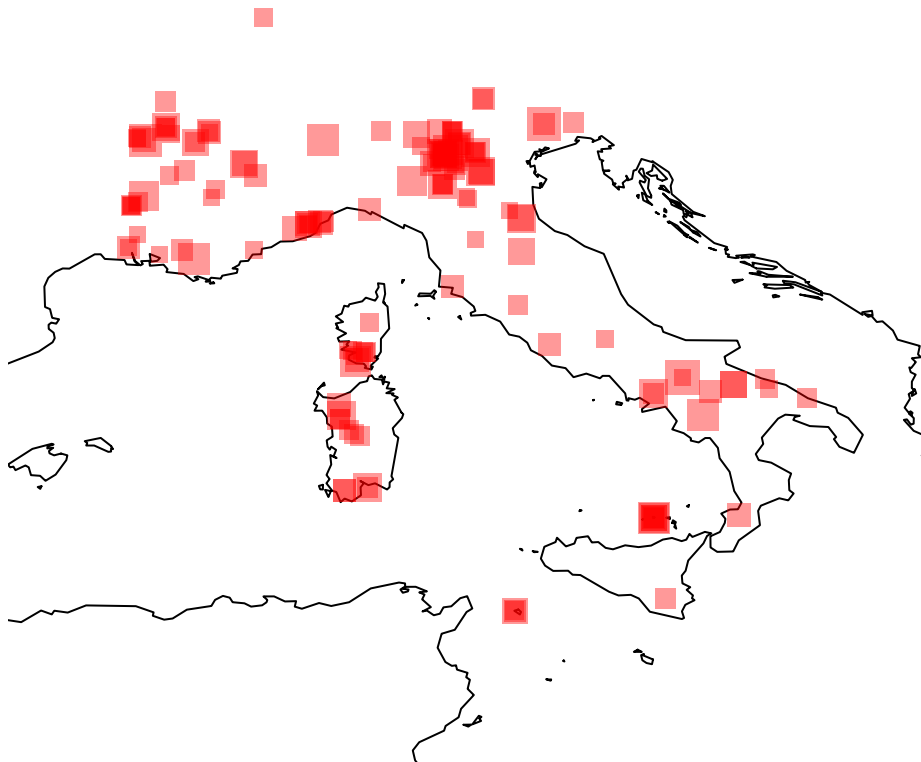

1690 cal. BC

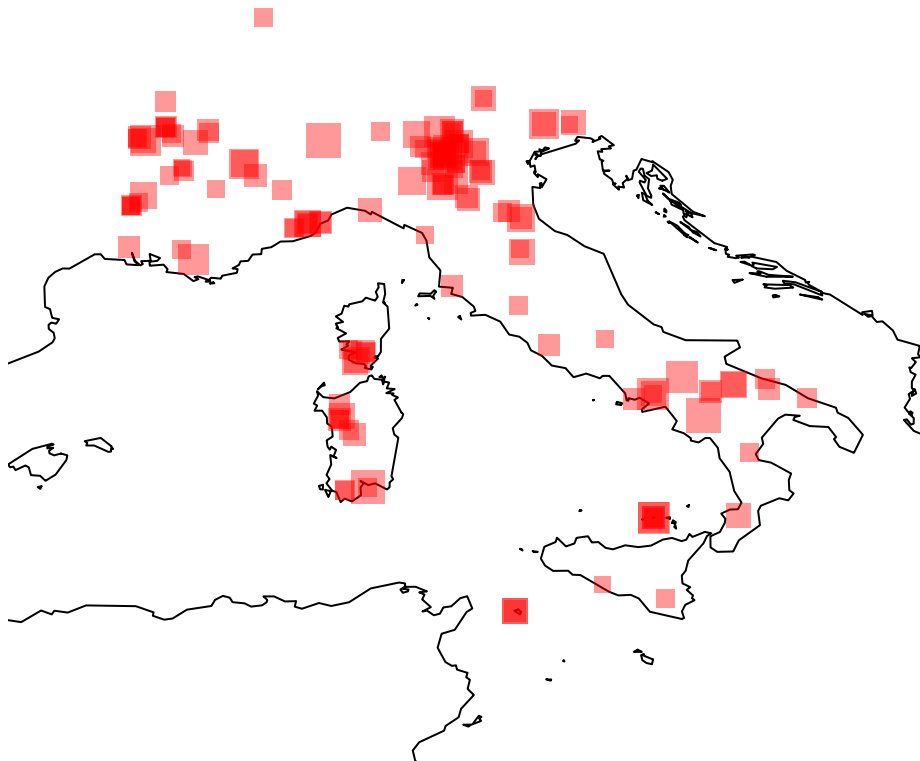



1685 cal. BC

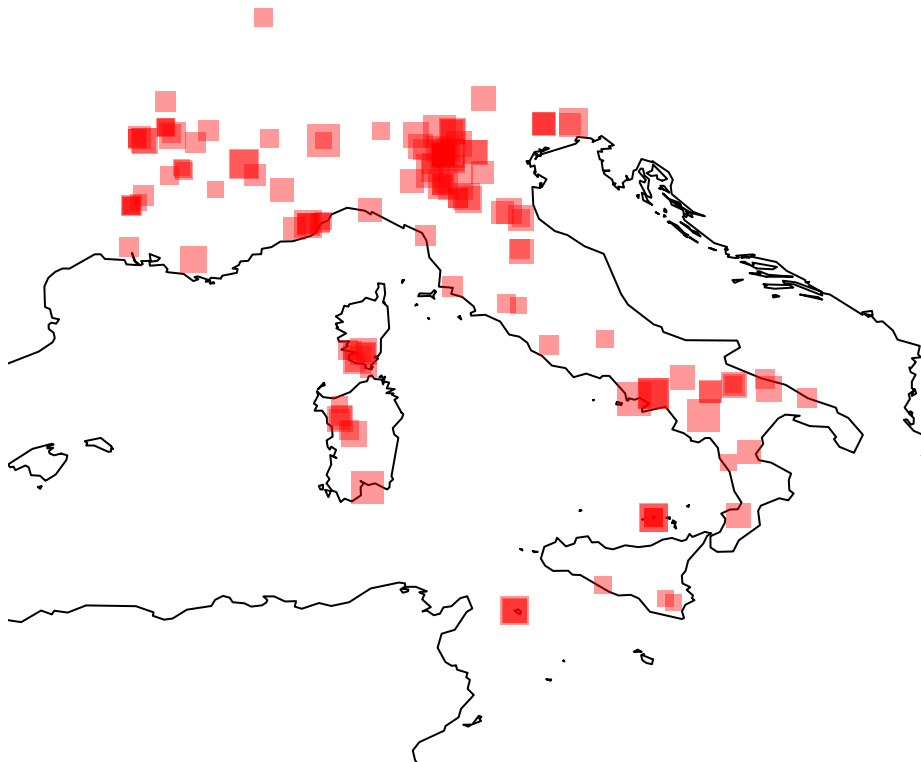

1680 cal. BC

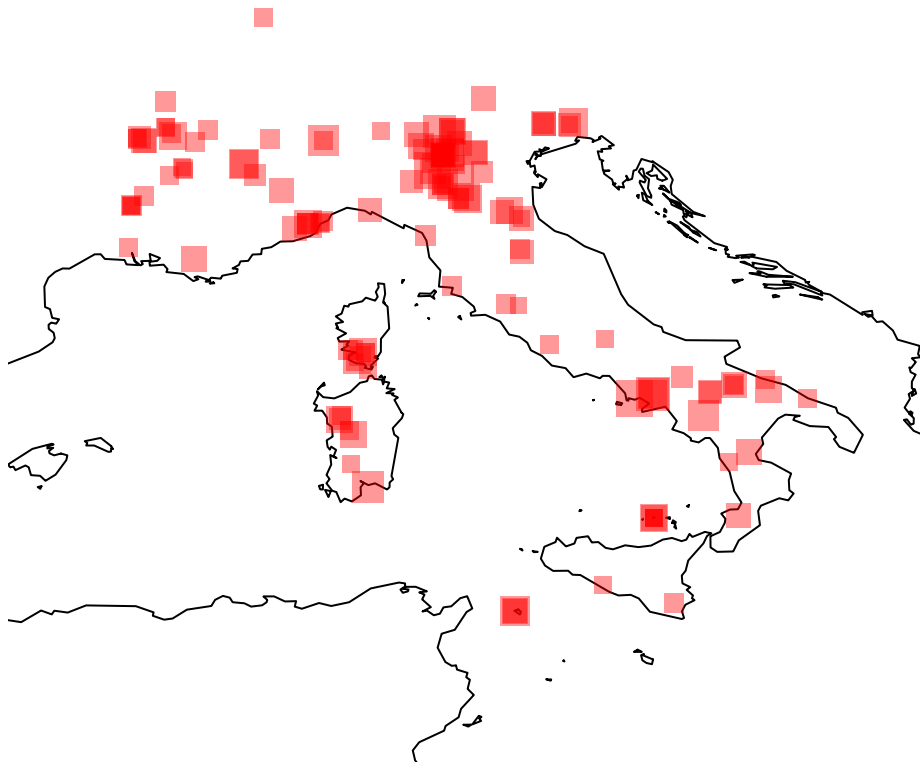

1675 cal. BC

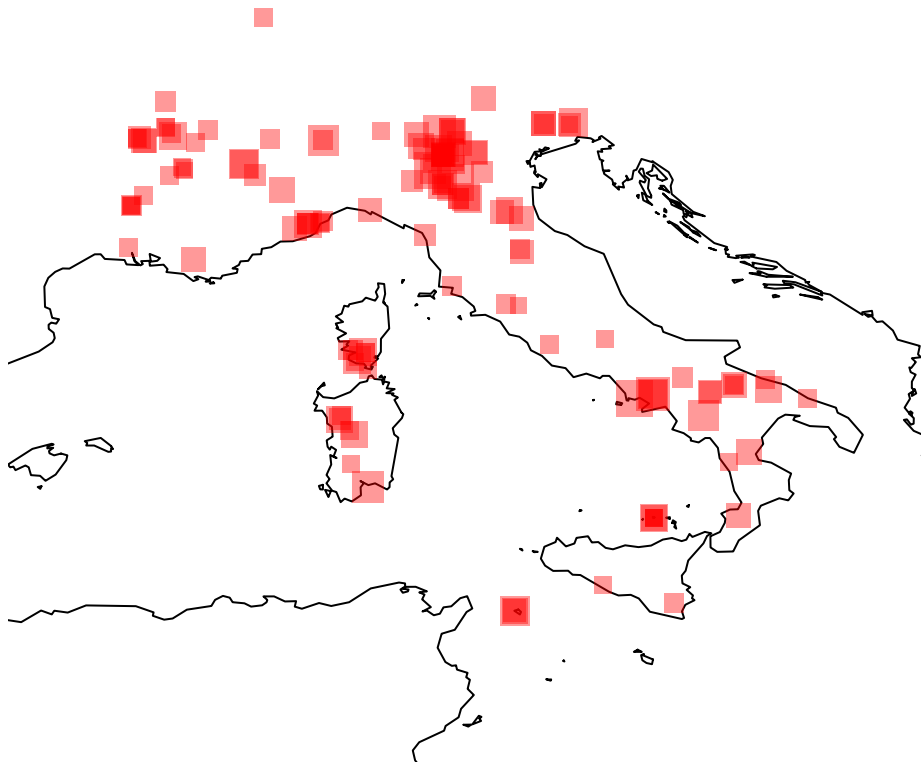

1670 cal. BC

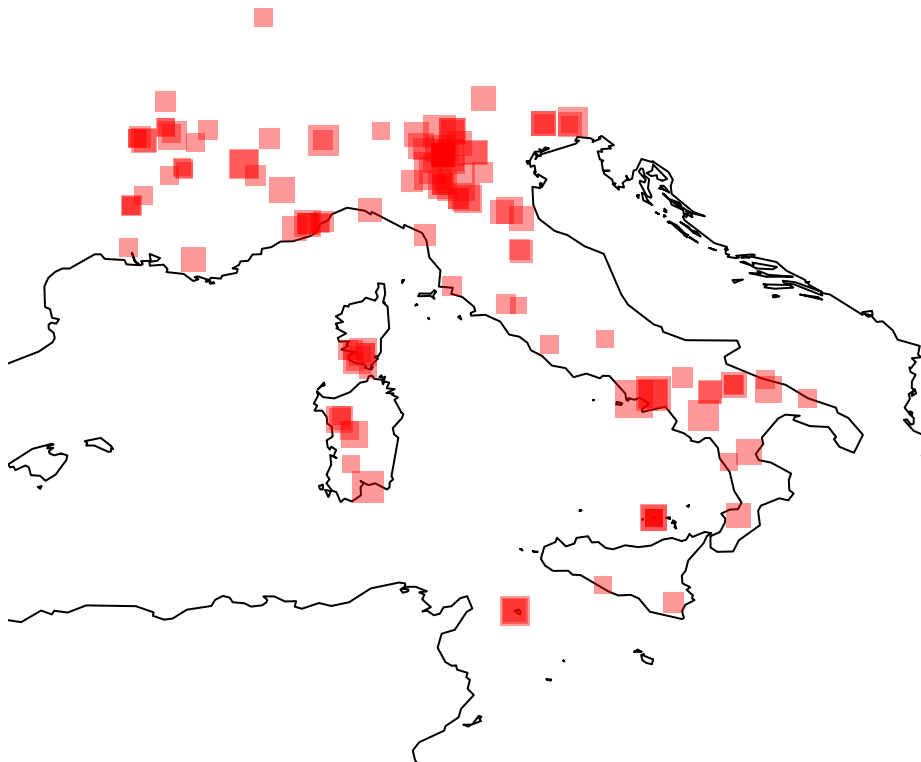

1665 cal. BC

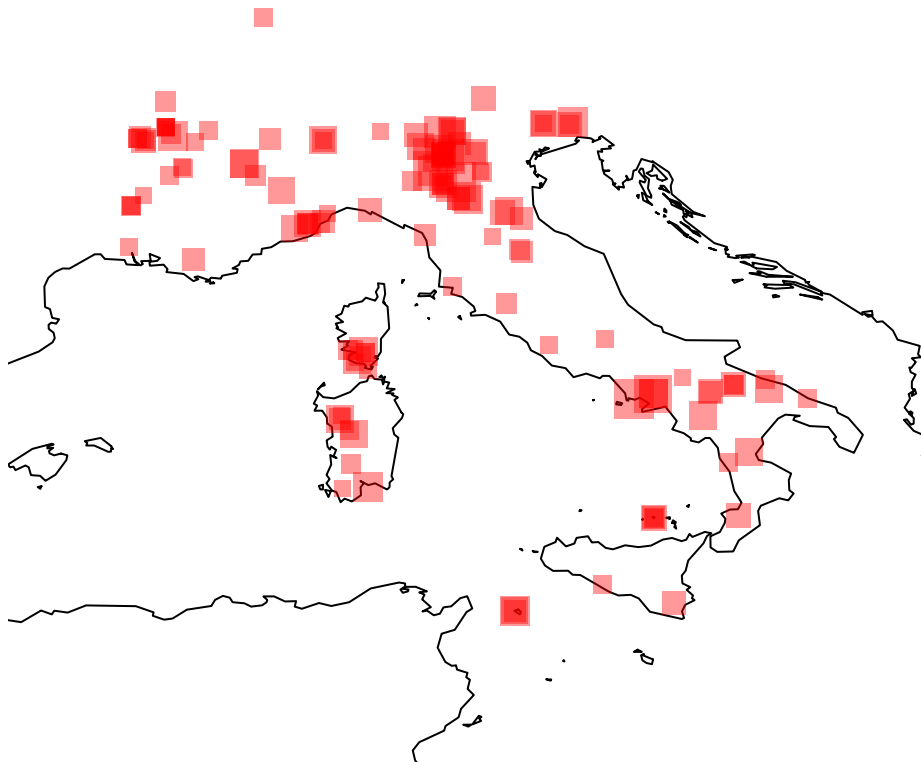

1660 cal. BC

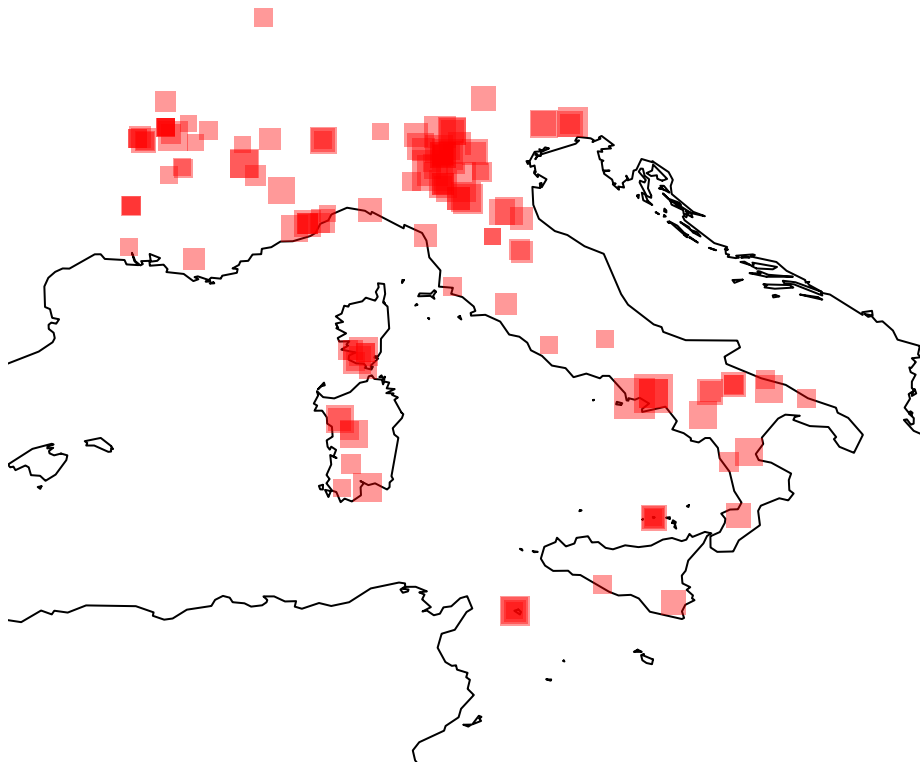

1655 cal. BC

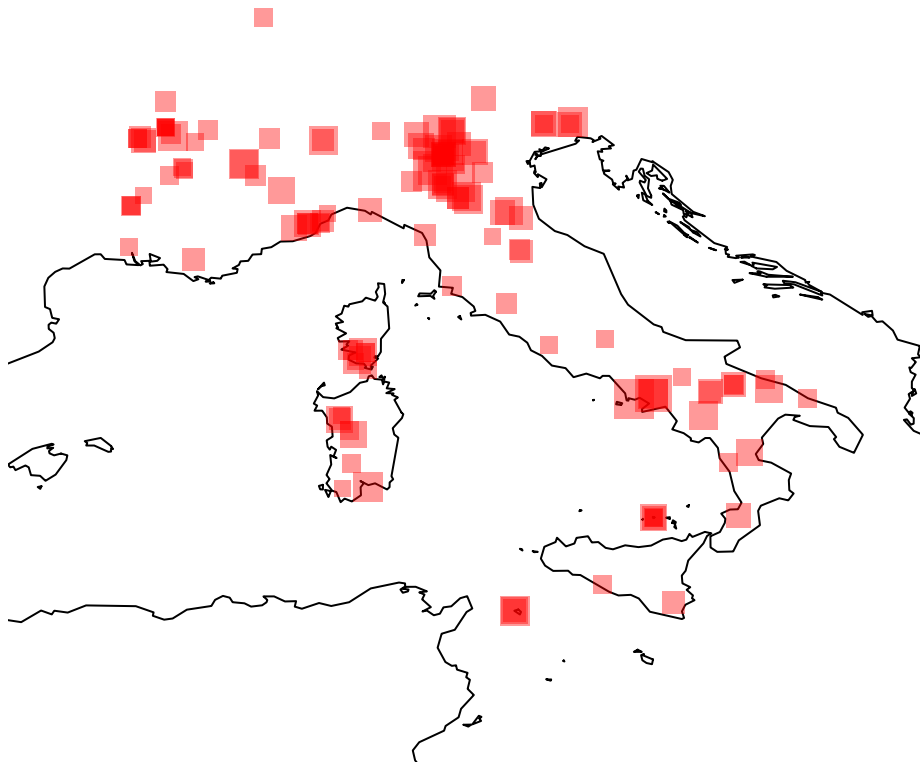

1650 cal. BC

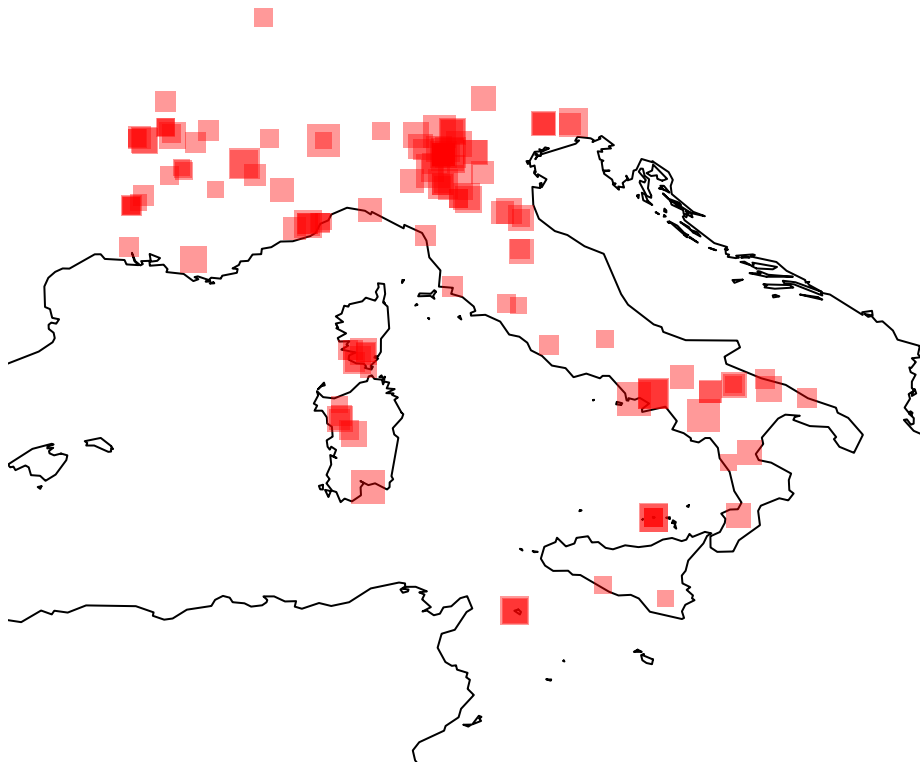



1645 cal. BC

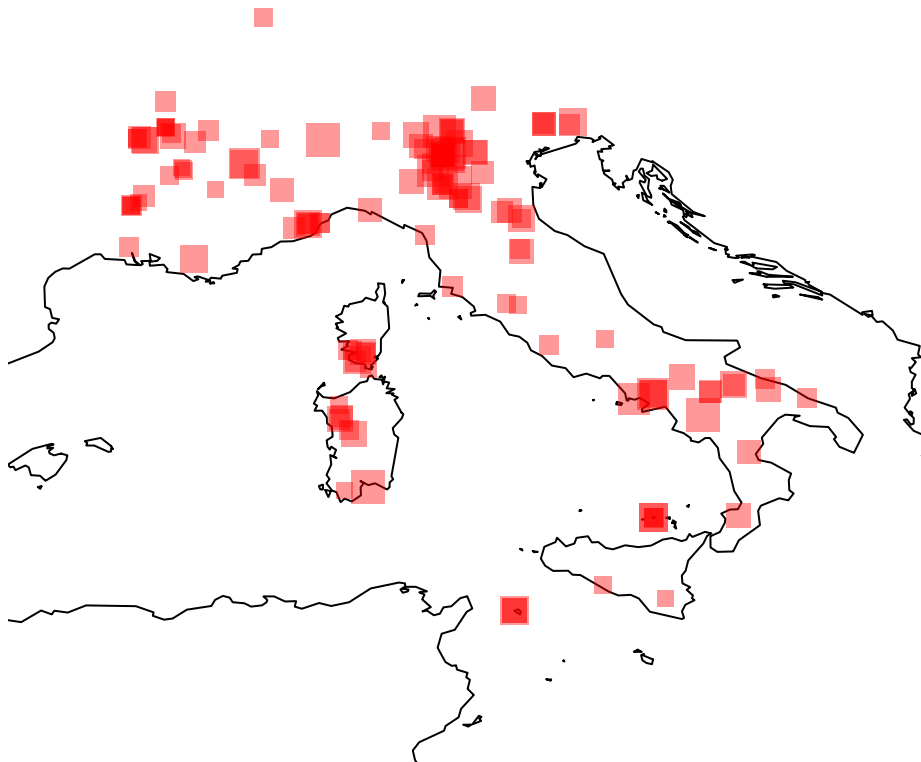

1640 cal. BC

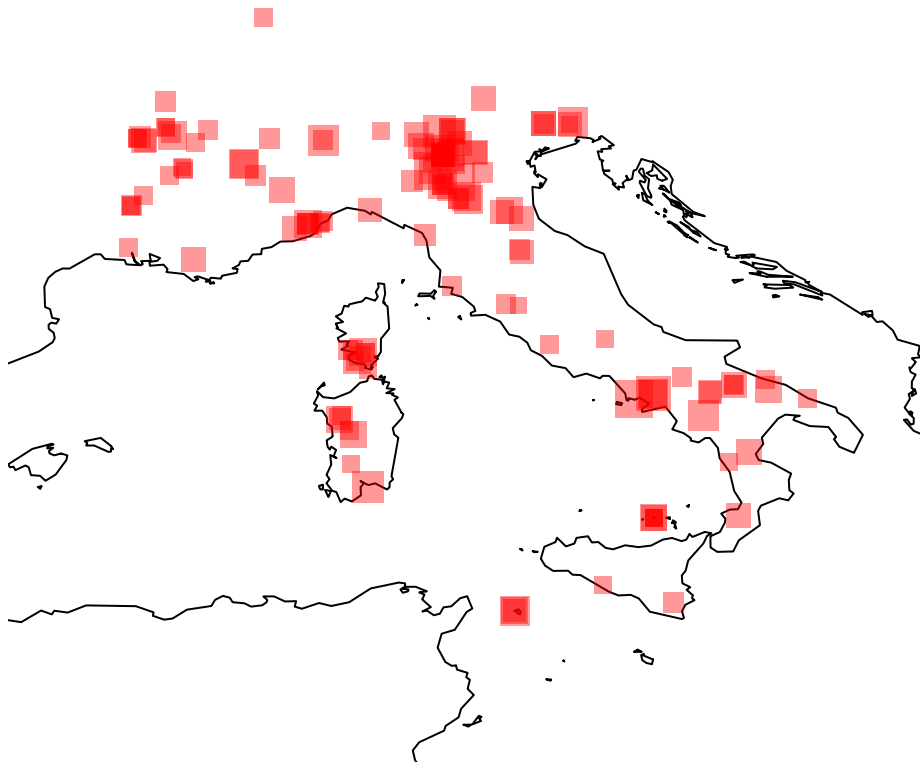

1635 cal. BC

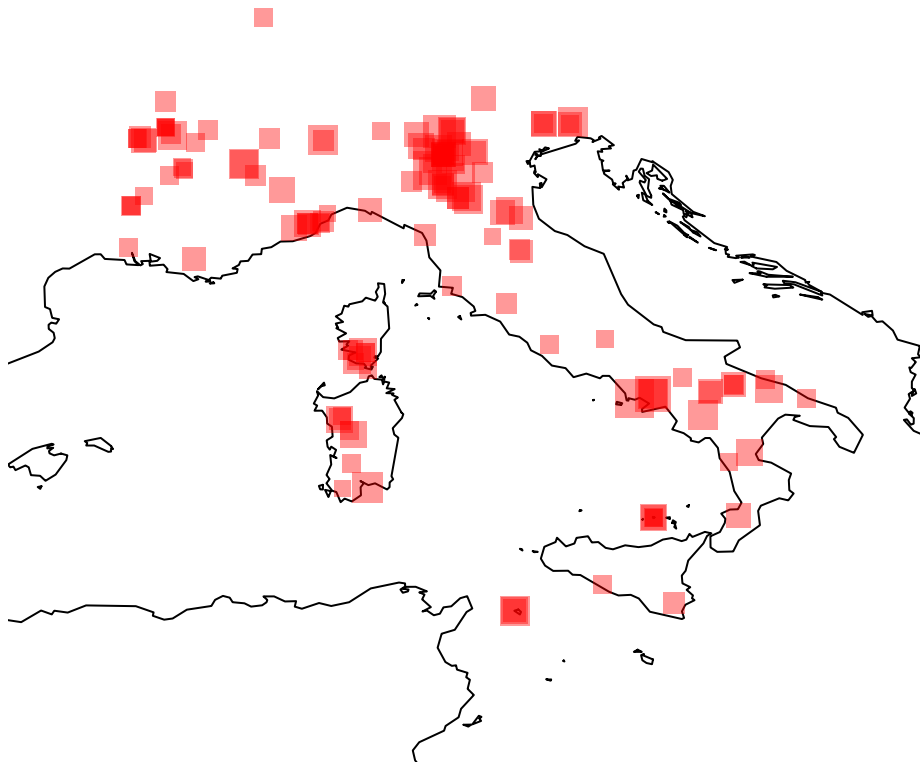

1630 cal. BC

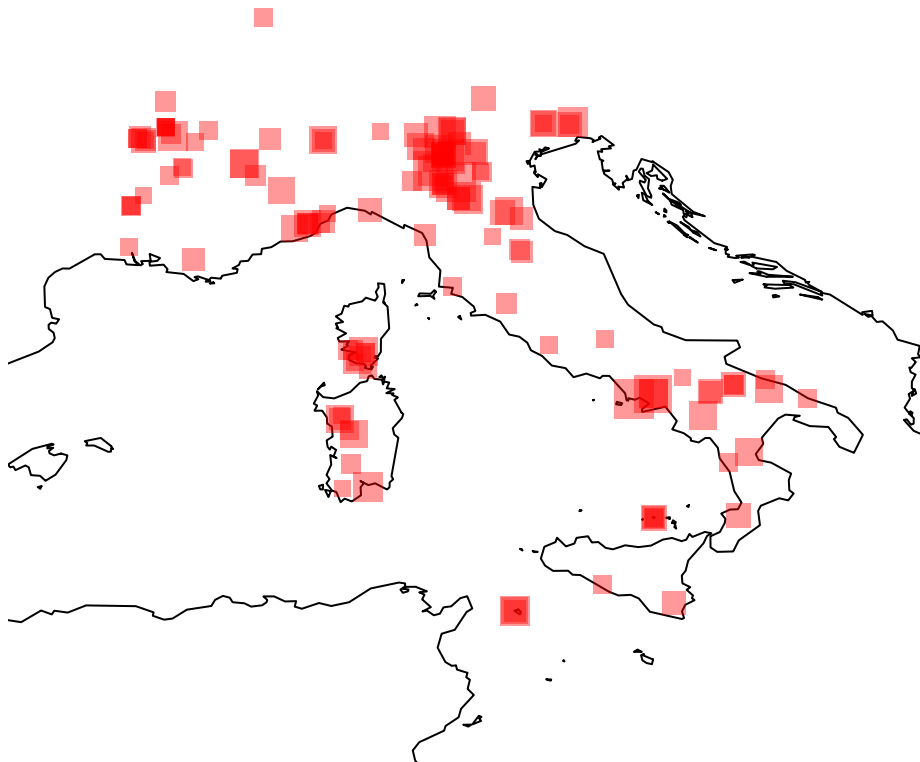

1625 cal. BC

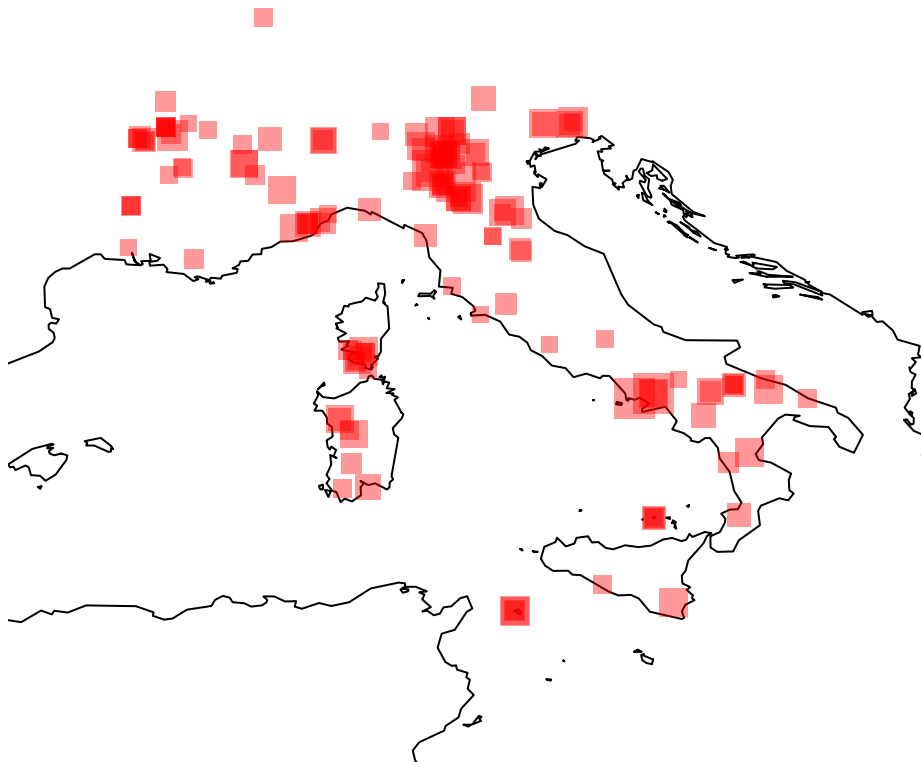

1620 cal. BC

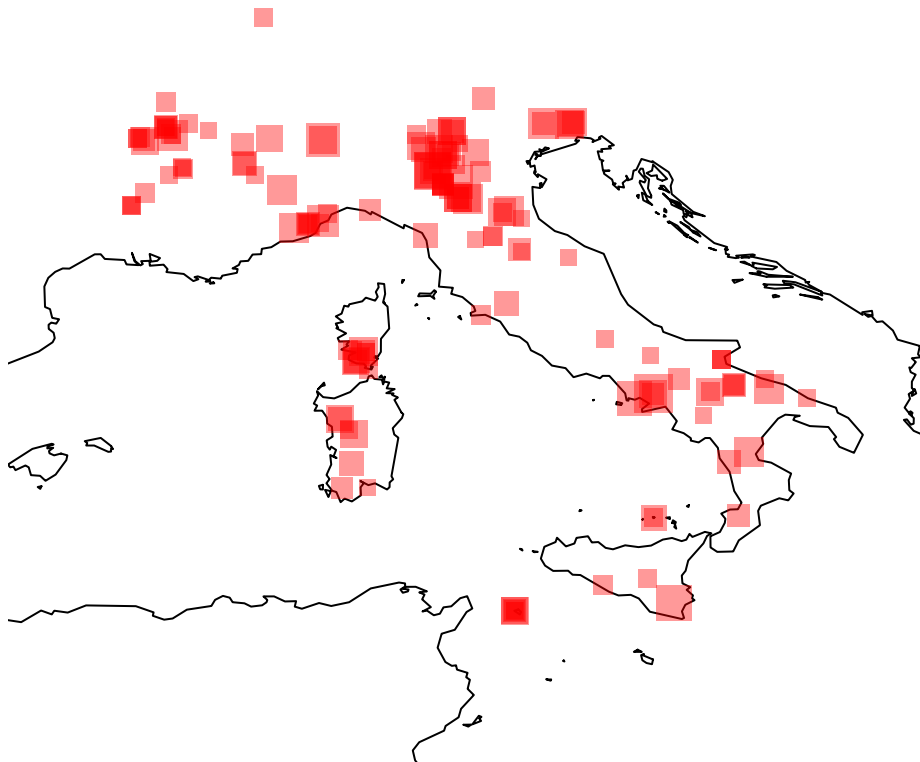

1615 cal. BC

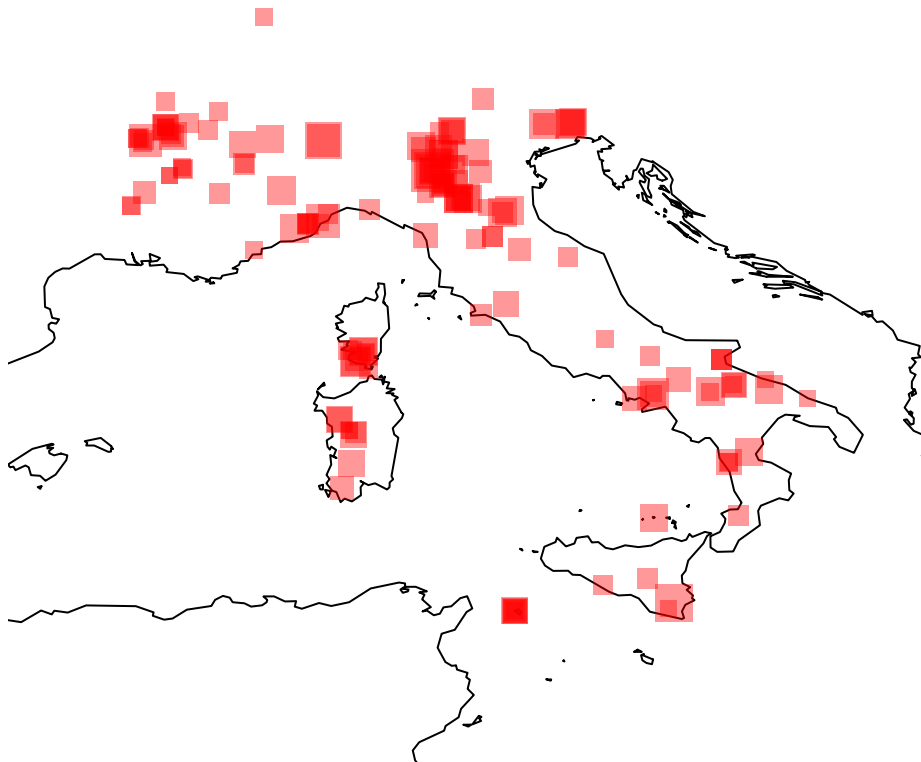

1610 cal. BC

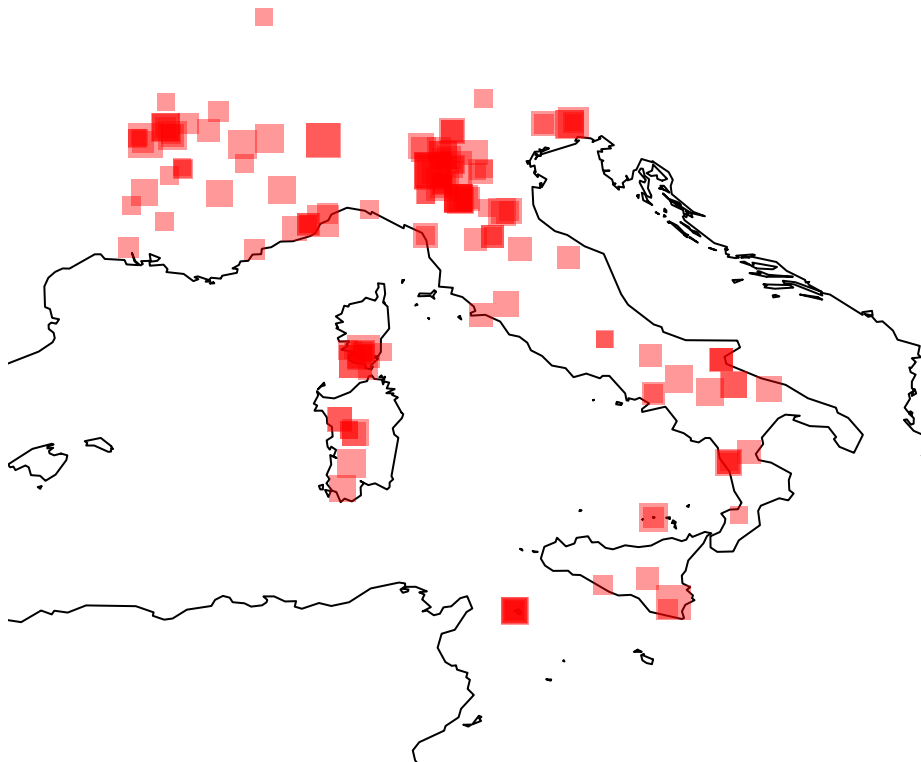



1605 cal. BC

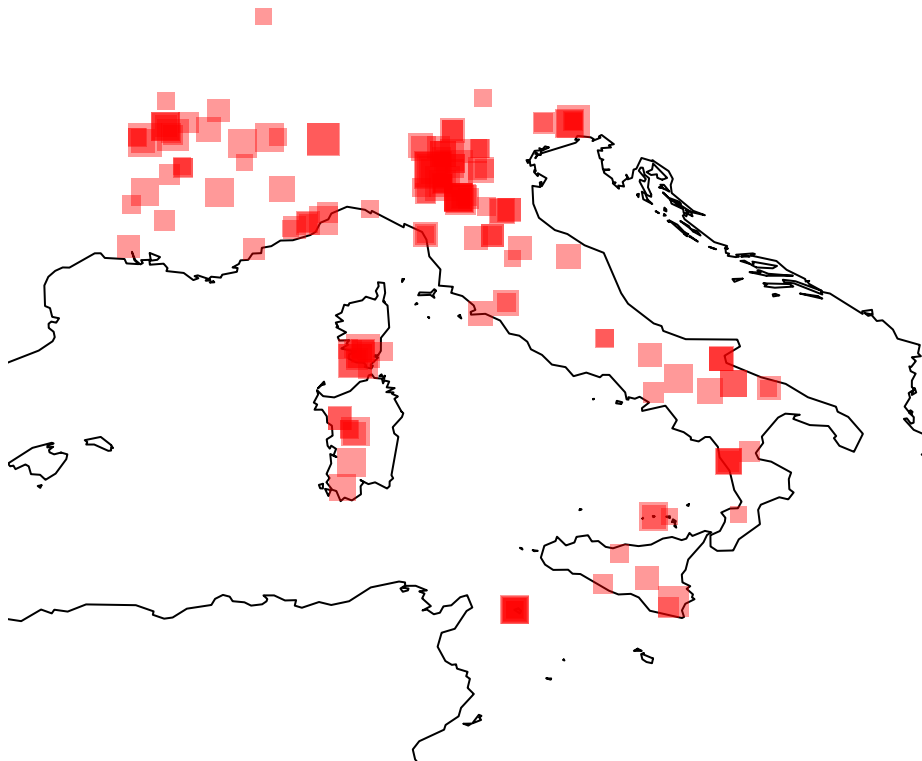

1600 cal. BC



1595 cal. BC

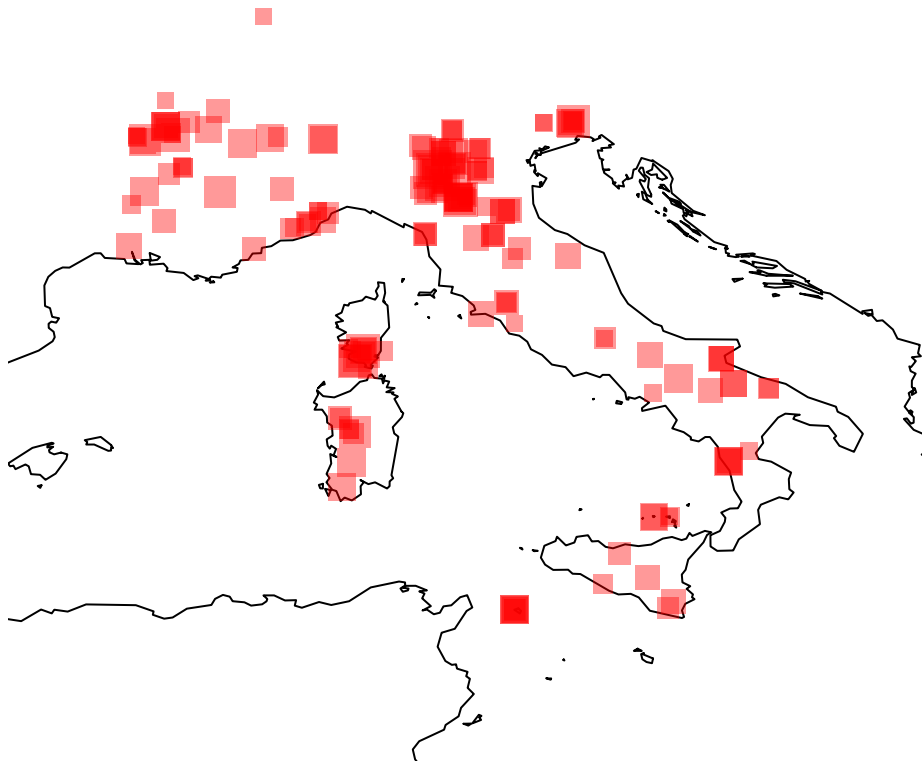

1590 cal. BC

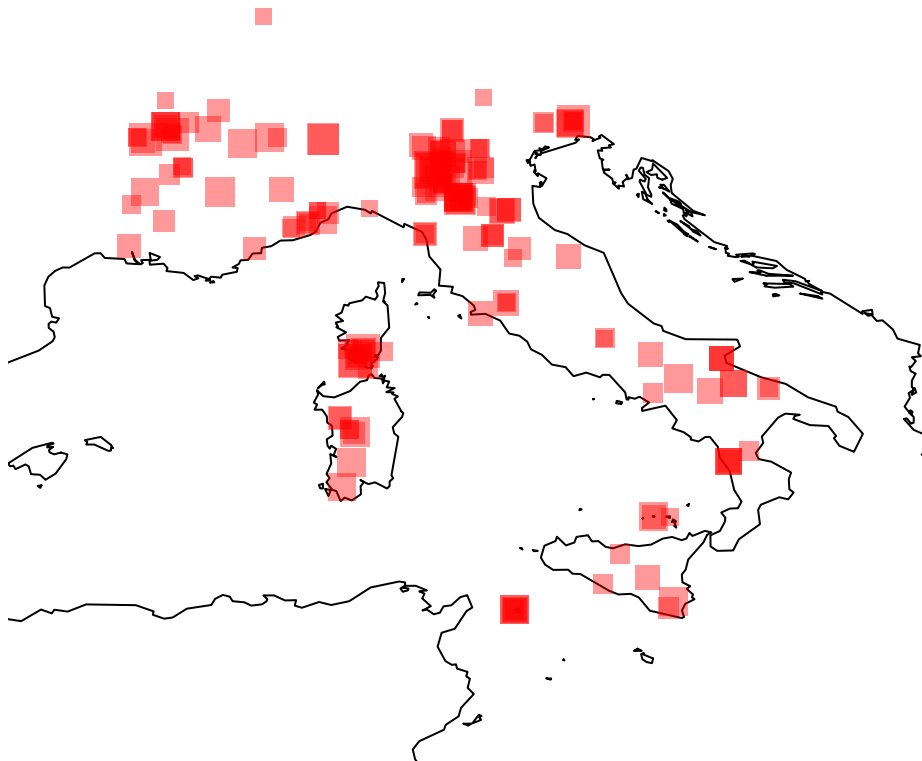

1585 cal. BC

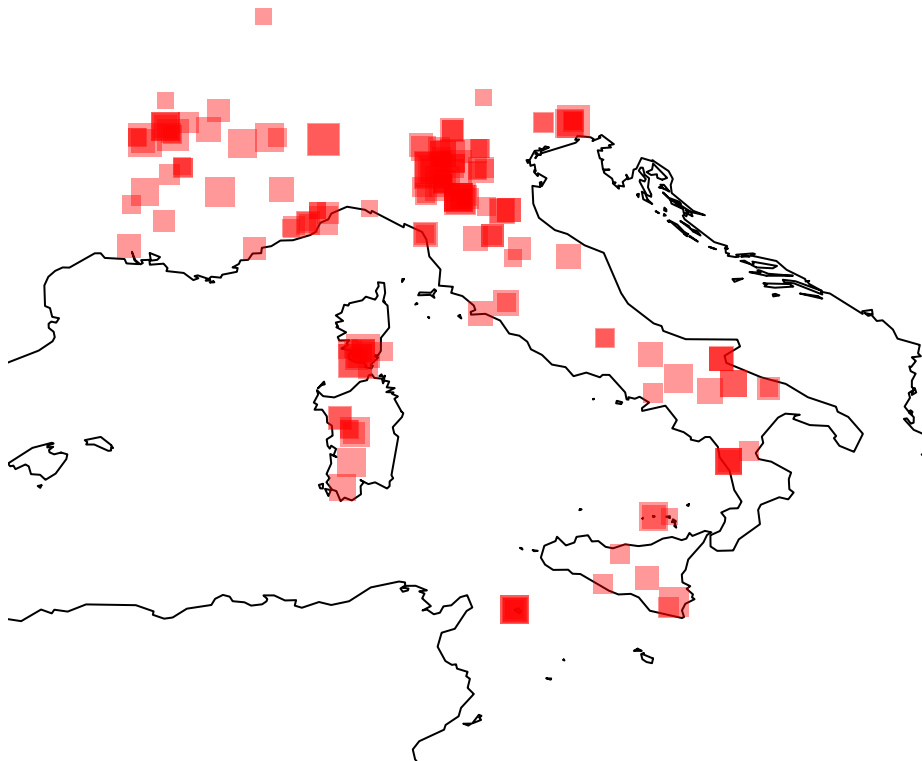

1580 cal. BC

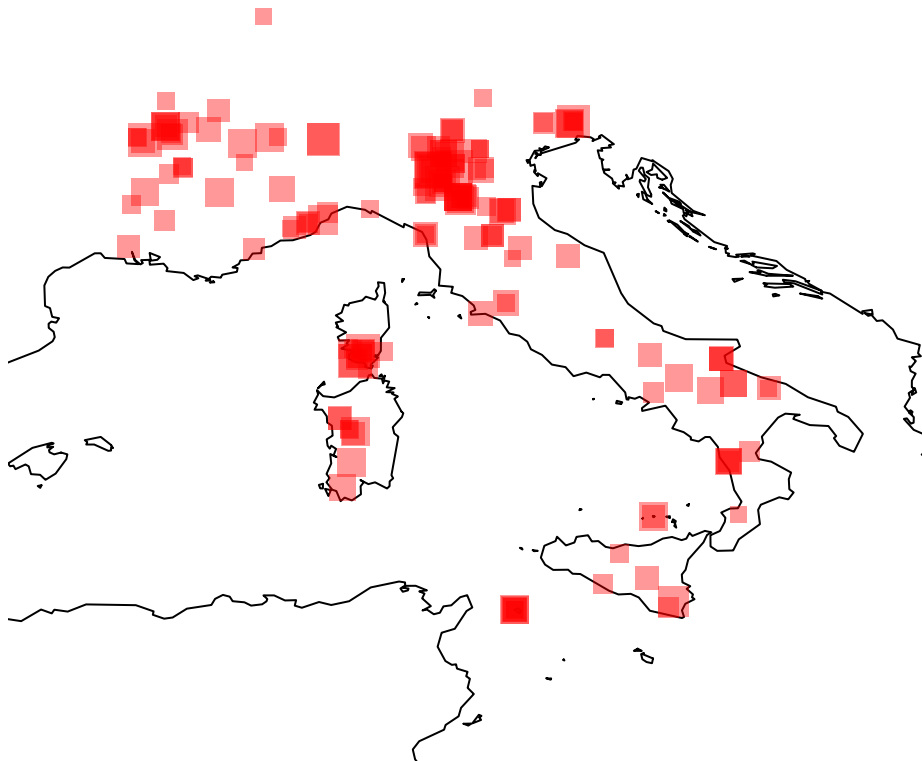

1575 cal. BC

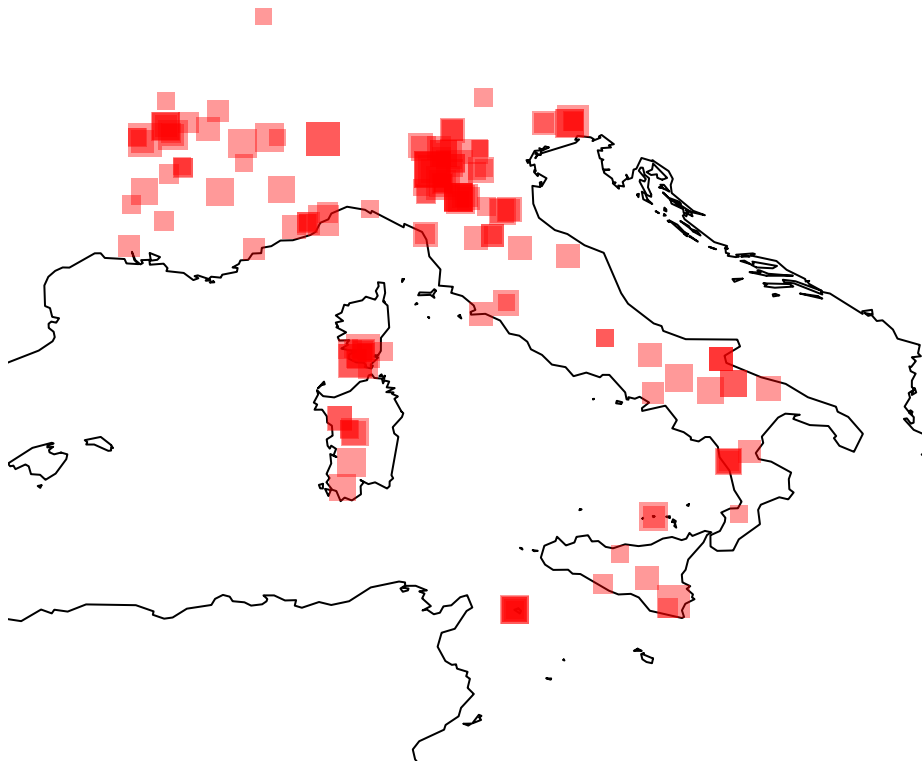

1570 cal. BC

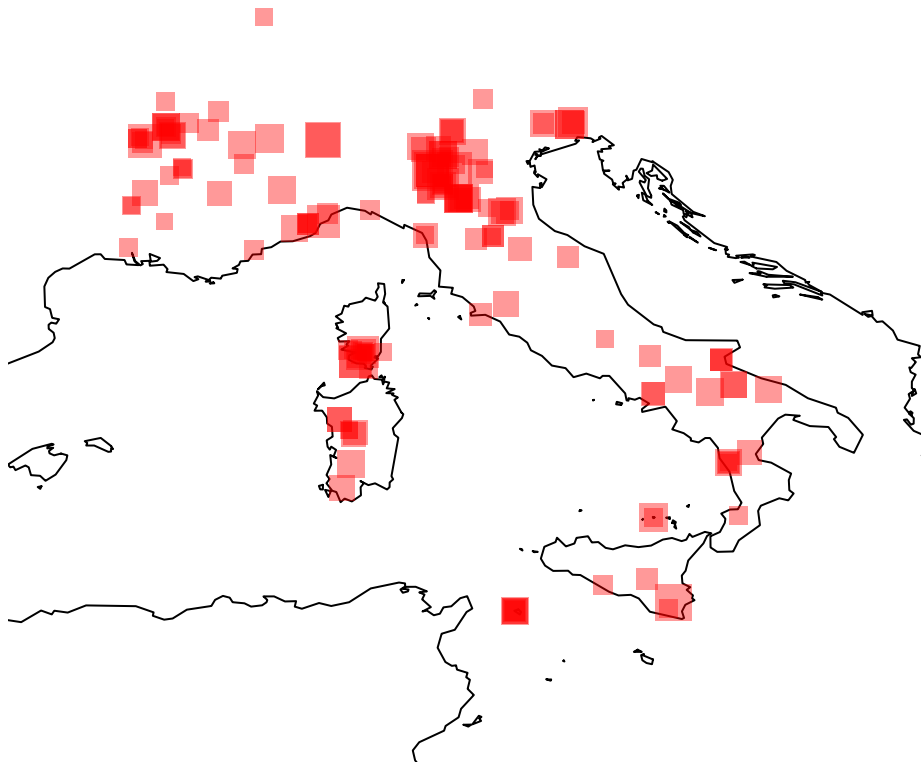



1565 cal. BC

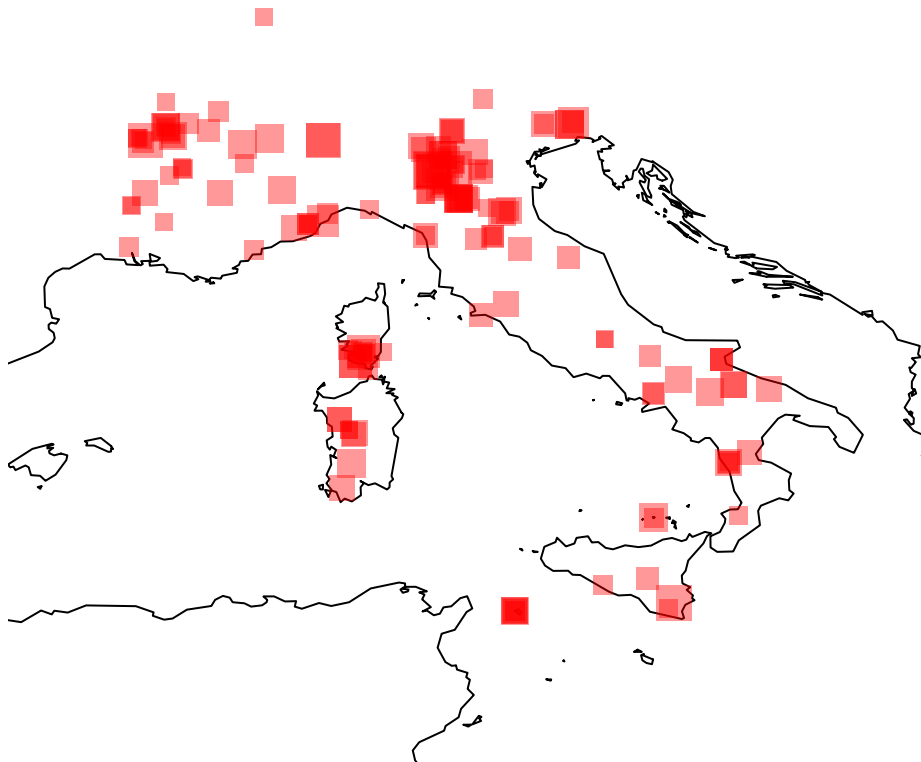

1560 cal. BC



1555 cal. BC



1550 cal. BC



1545 cal. BC

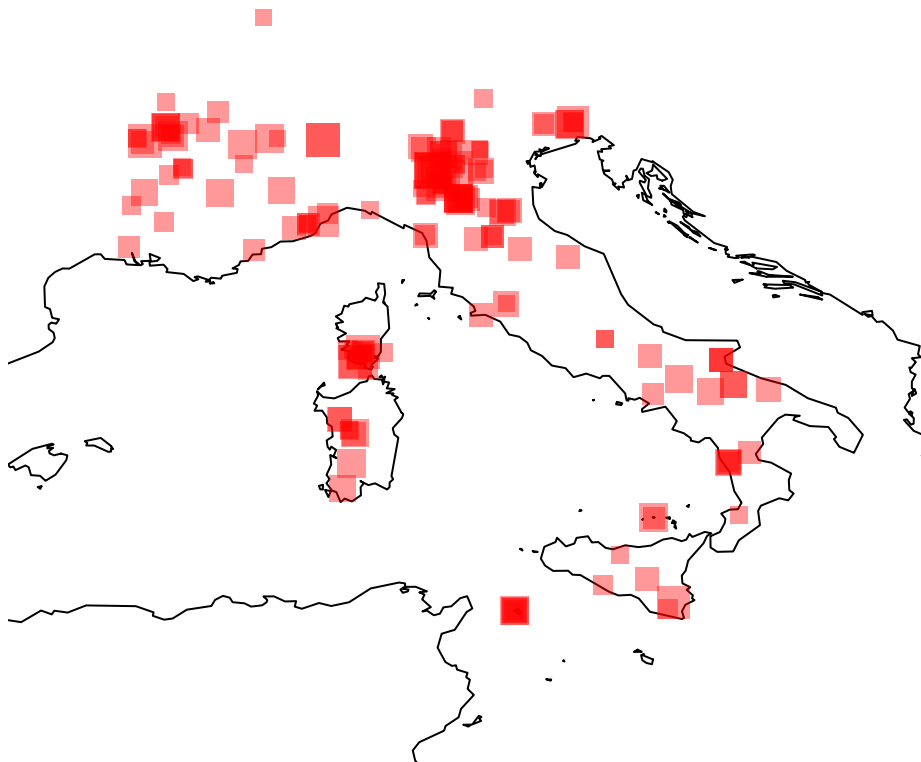

1540 cal. BC

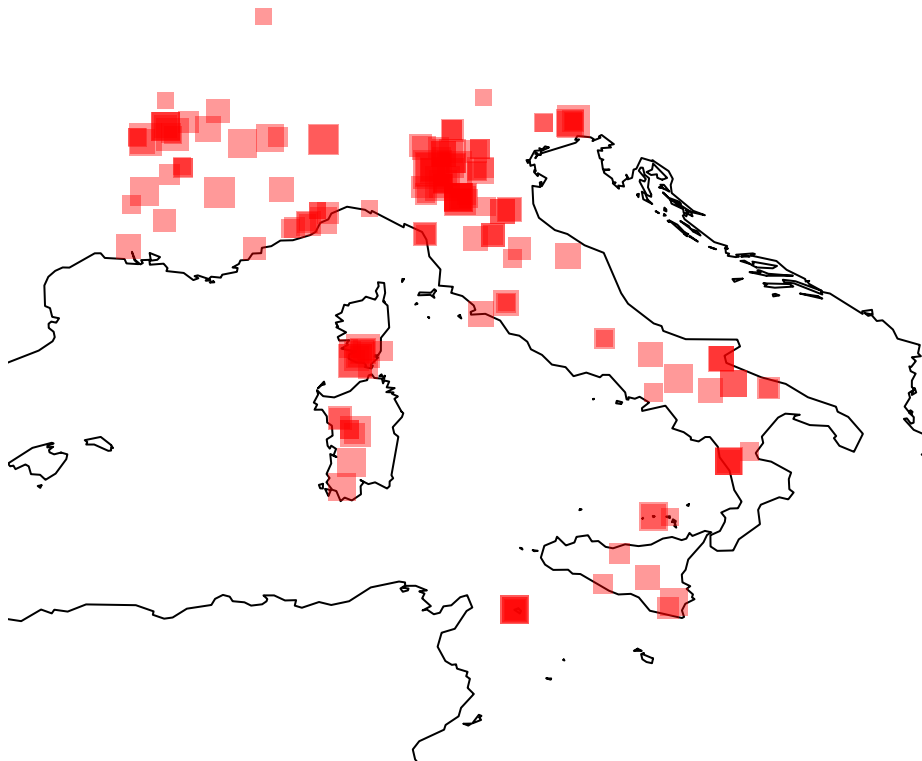

1535 cal. BC

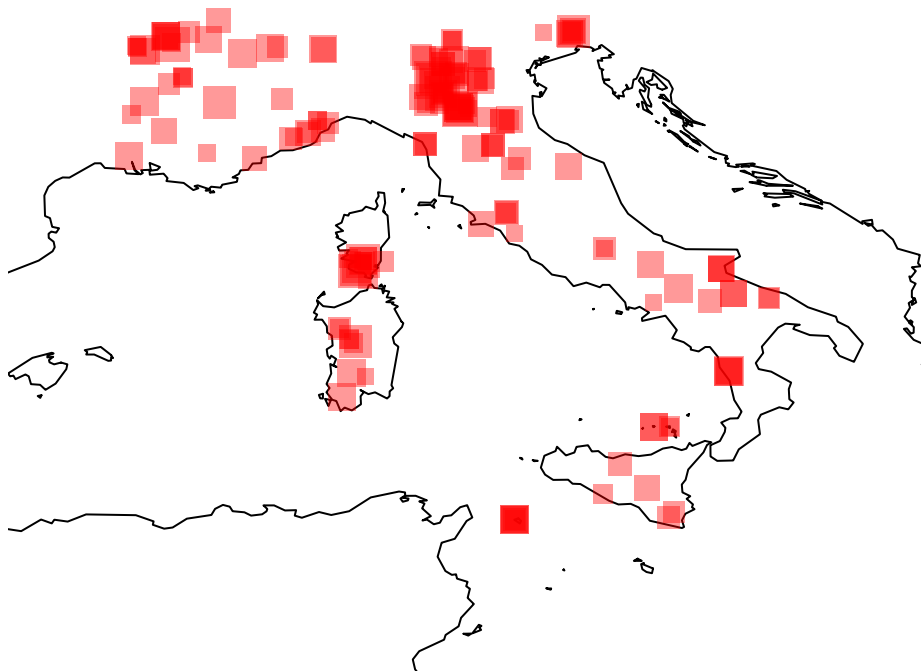

1530 cal. BC

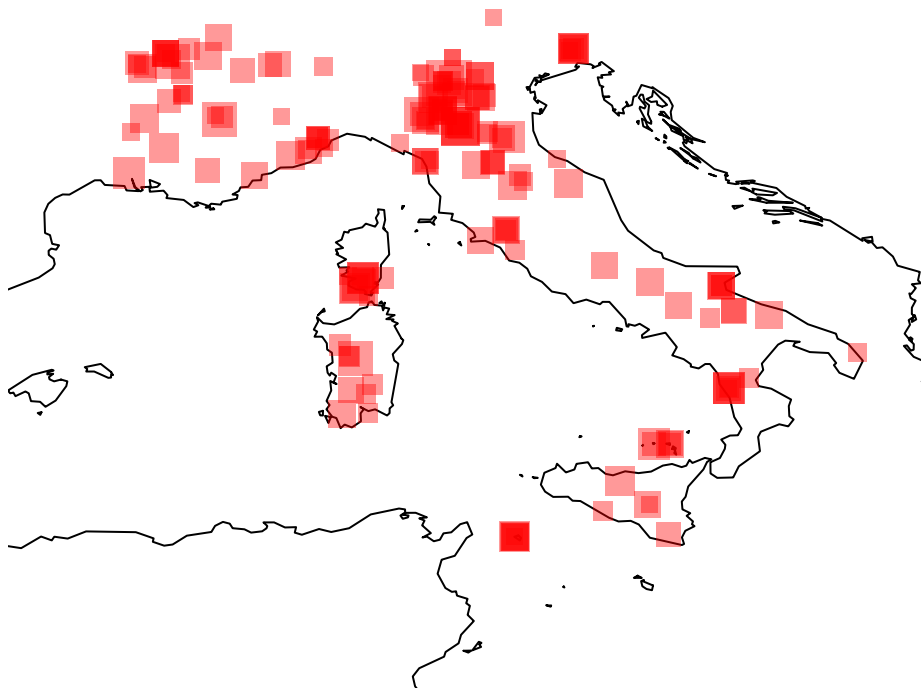



1525 cal. BC

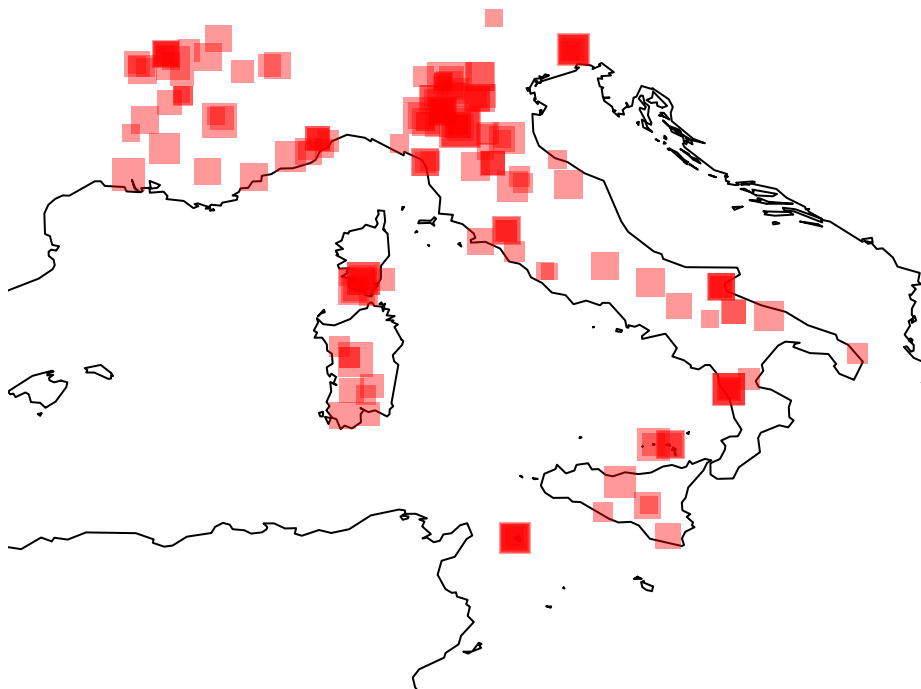

1520 cal. BC

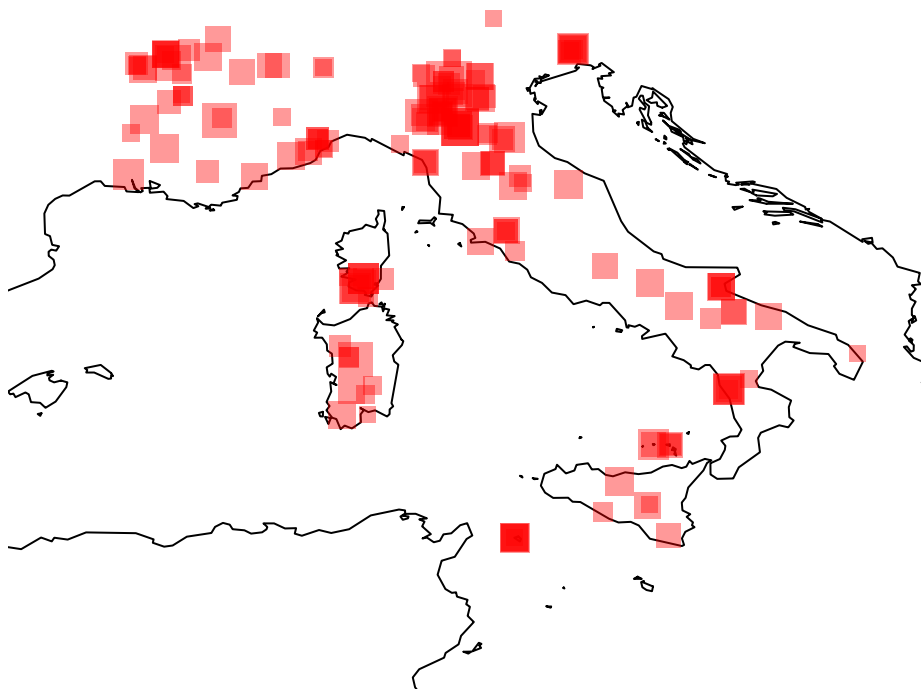

1515 cal. BC

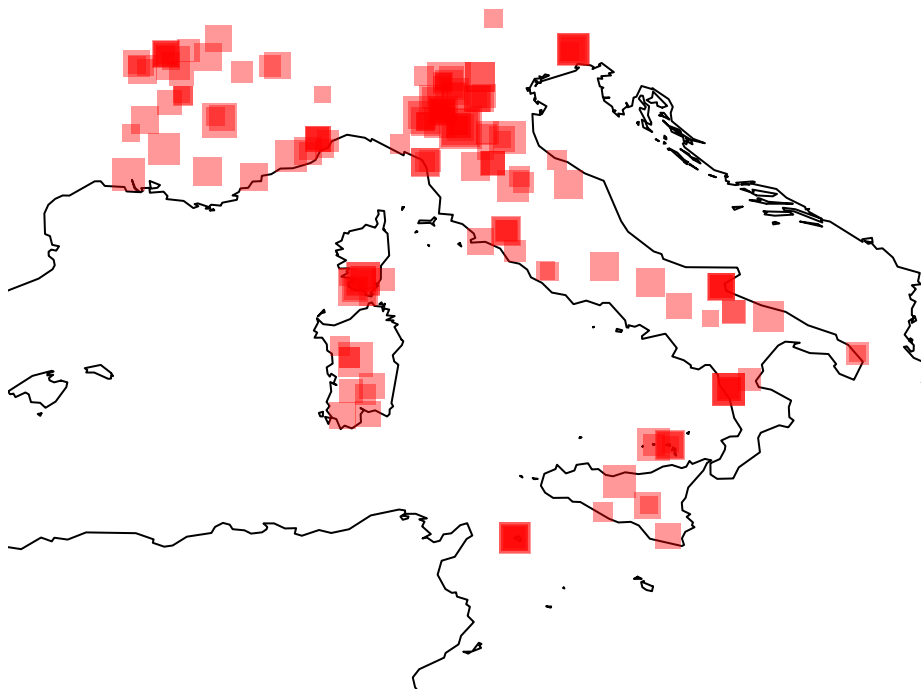

1510 cal. BC

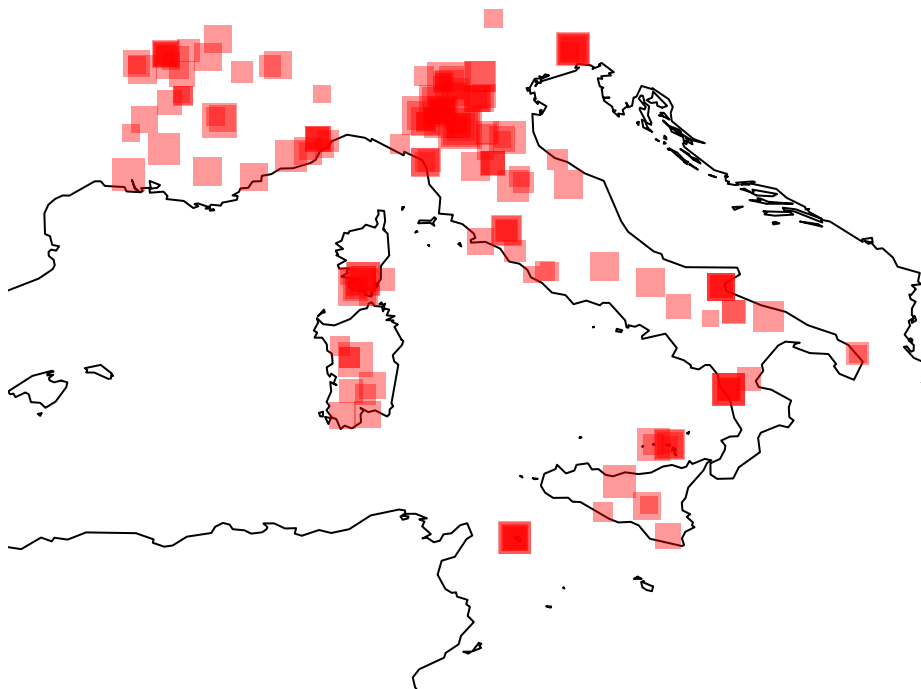

1505 cal. BC

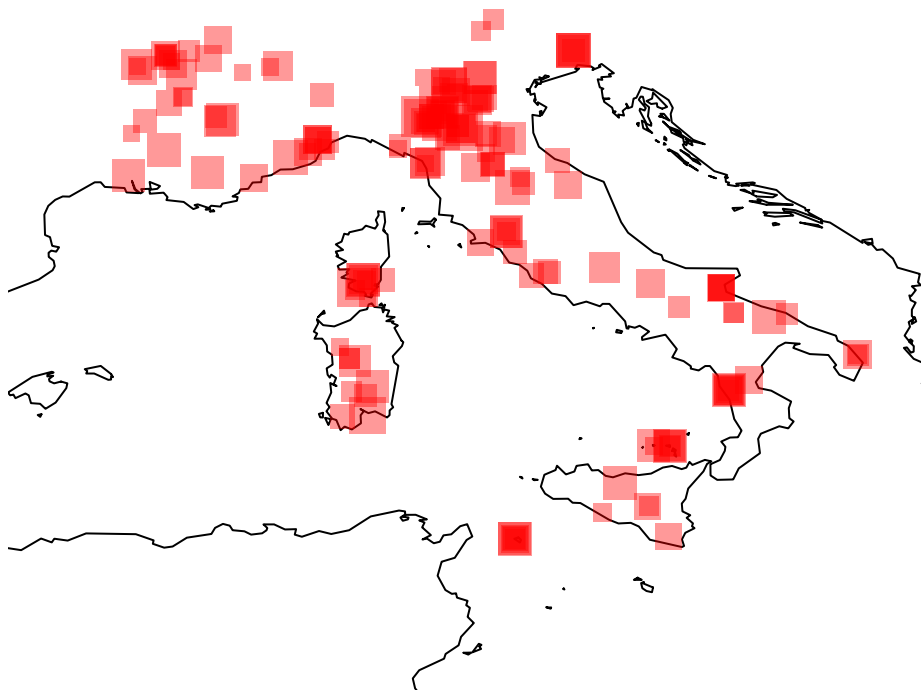

1500 cal. BC

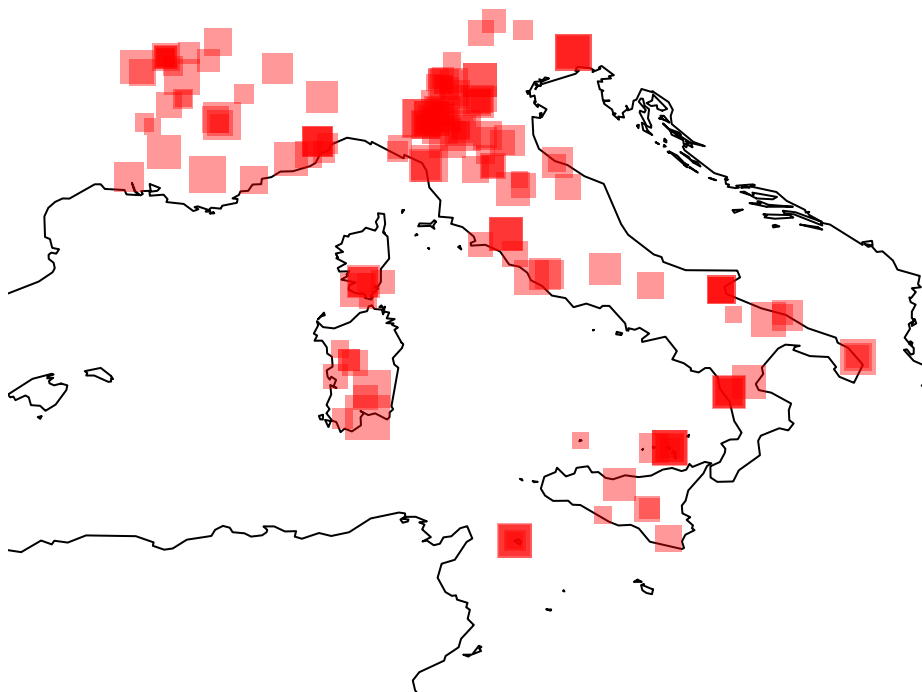

1495 cal. BC

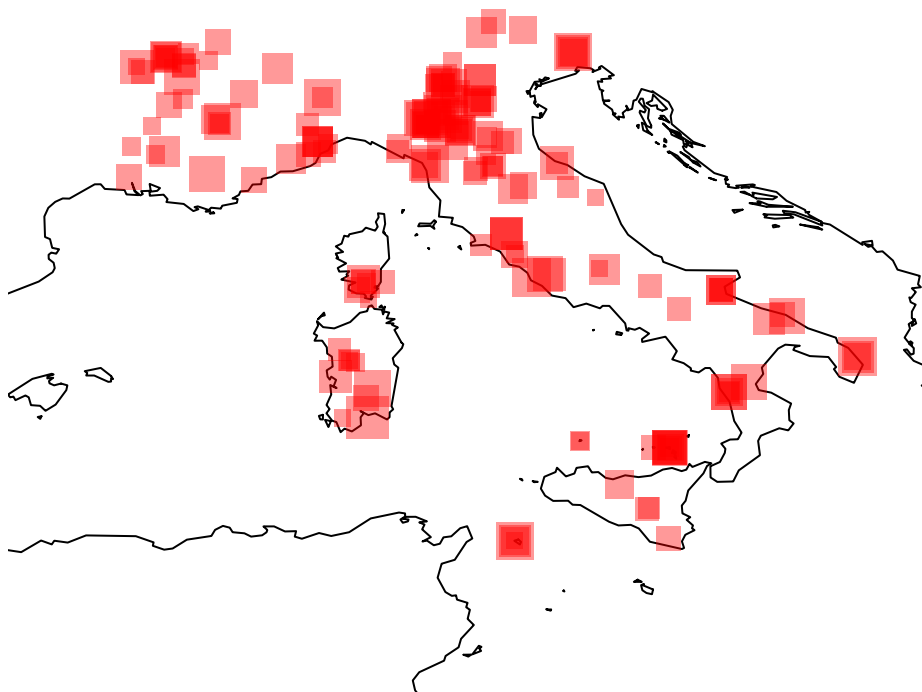

1490 cal. BC

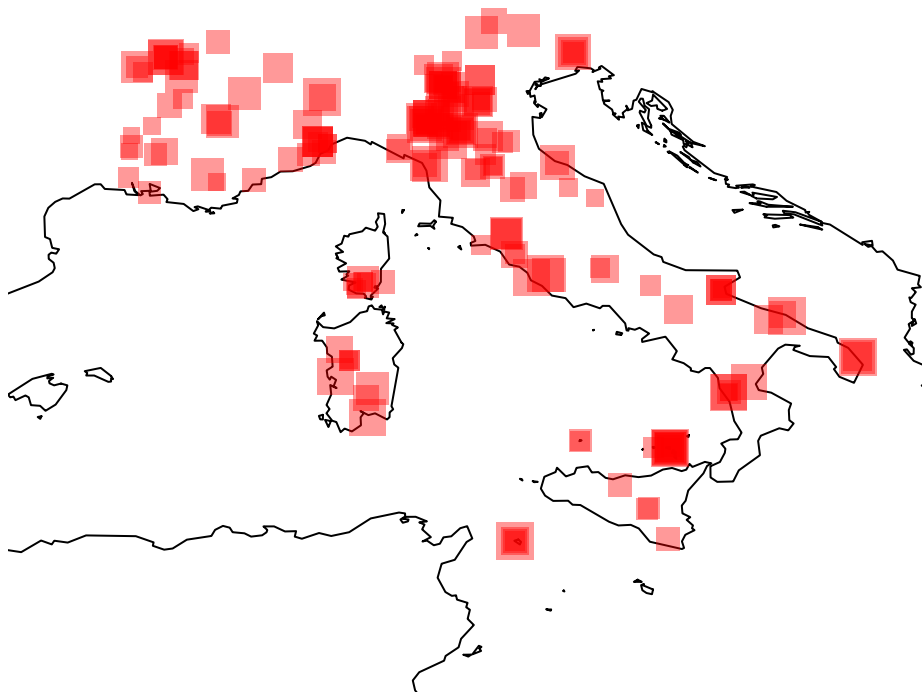



1485 cal. BC

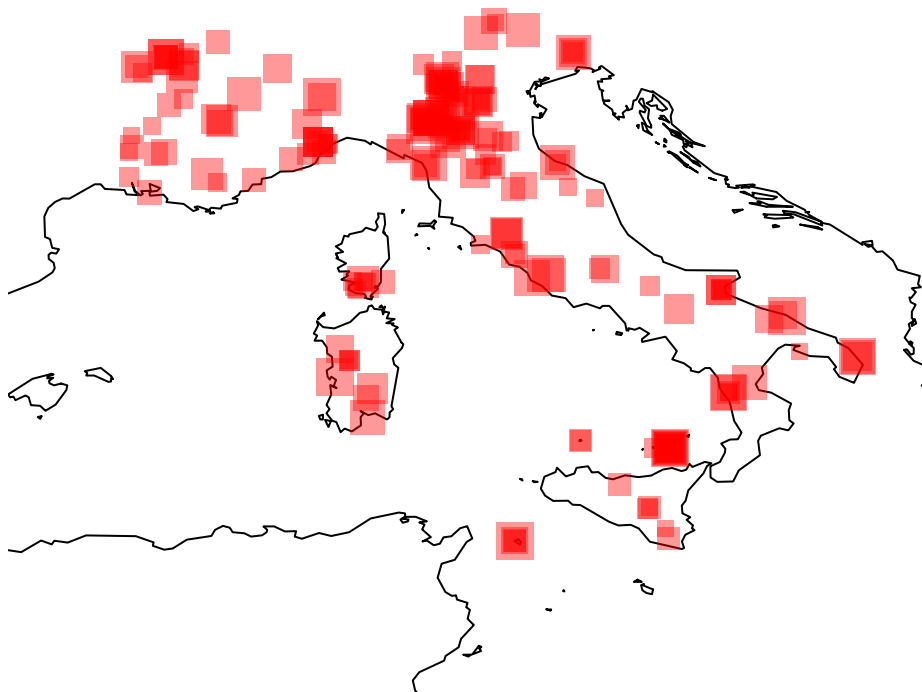

1480 cal. BC

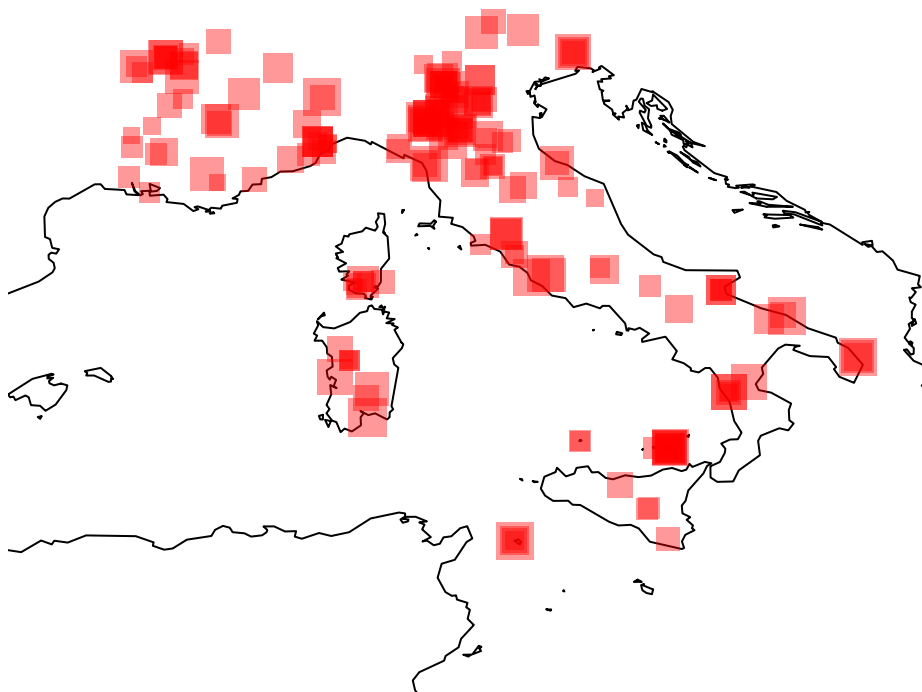

1475 cal. BC

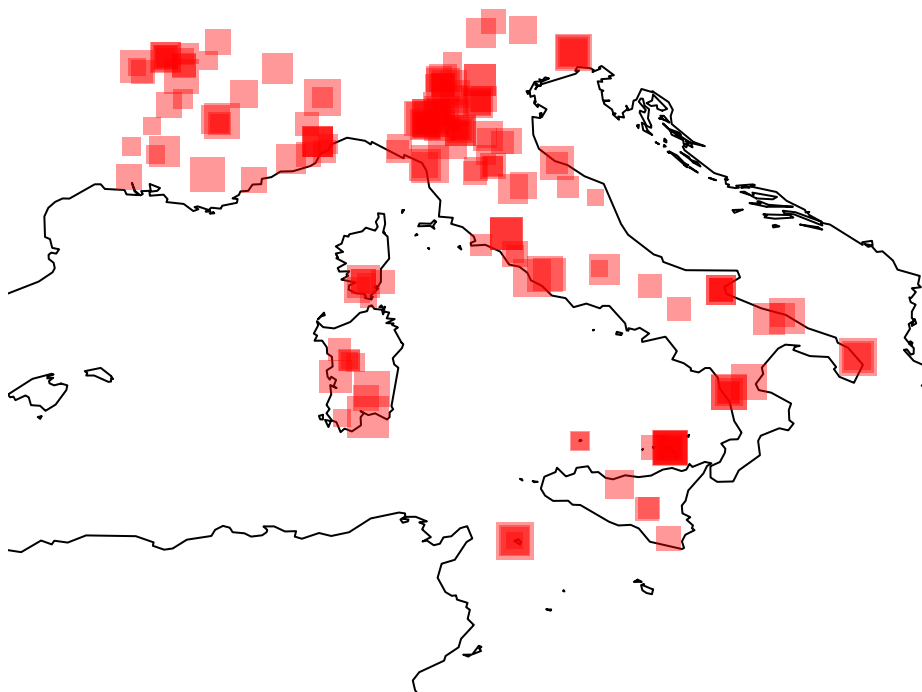

1470 cal. BC

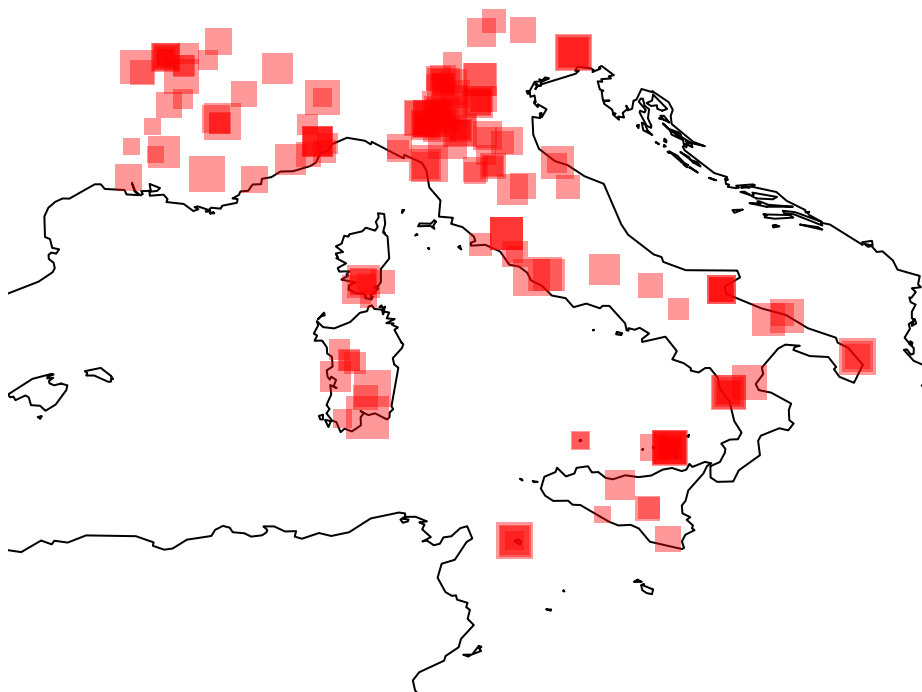

1465 cal. BC

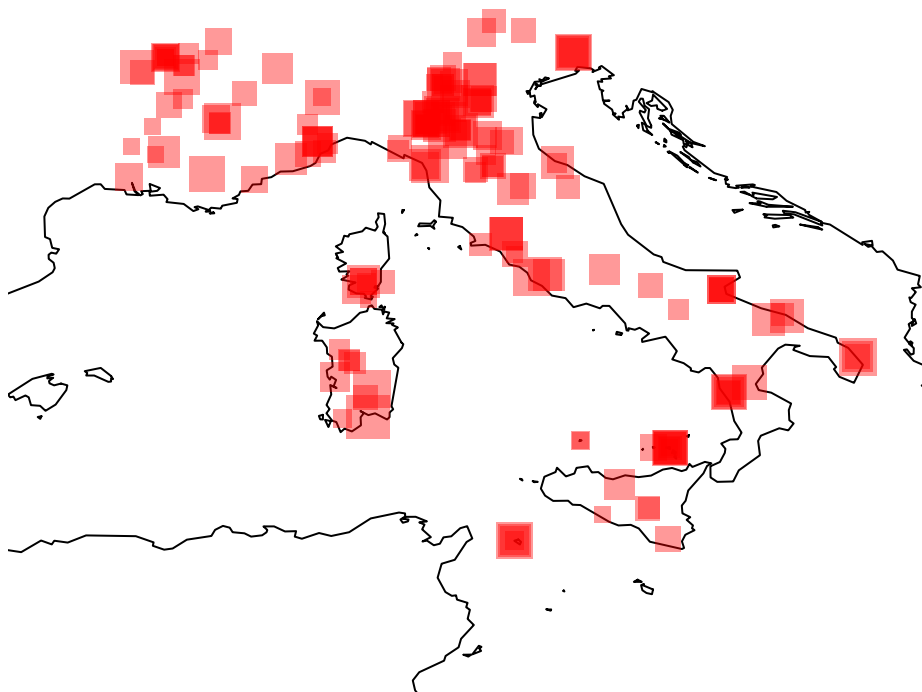

1460 cal. BC

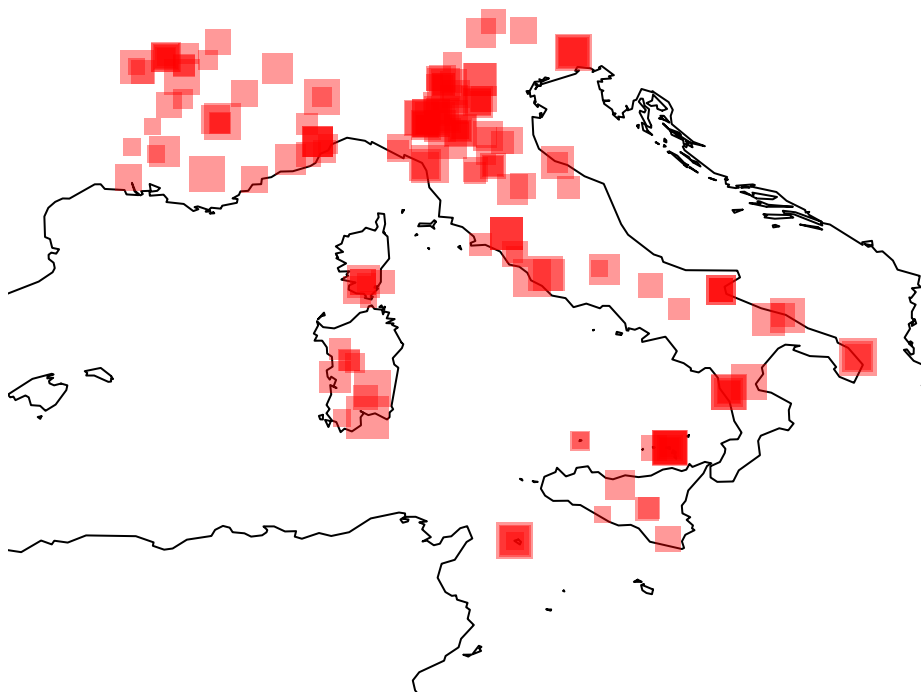

1455 cal. BC

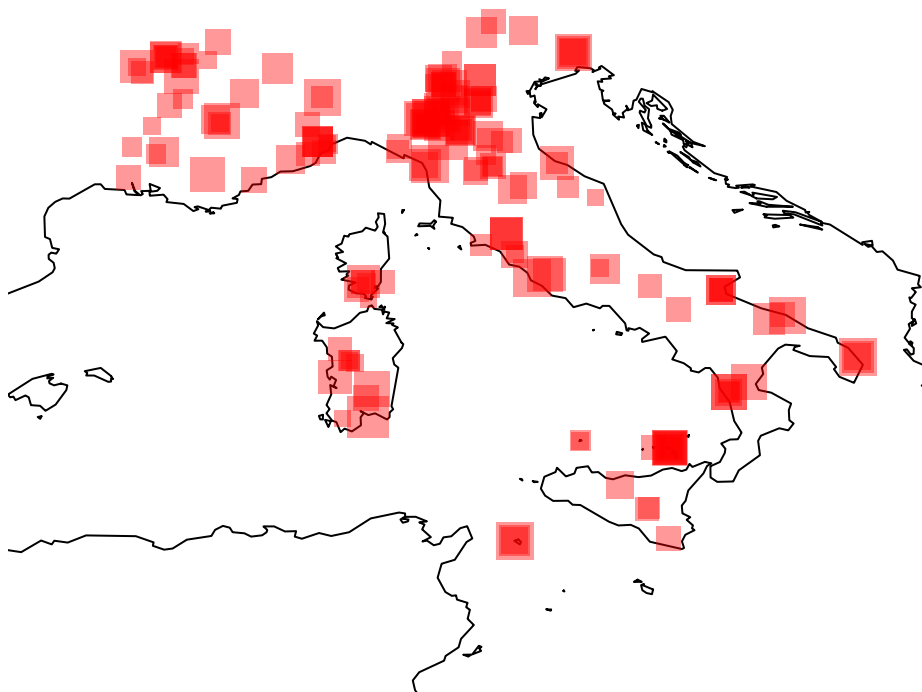

1450 cal. BC

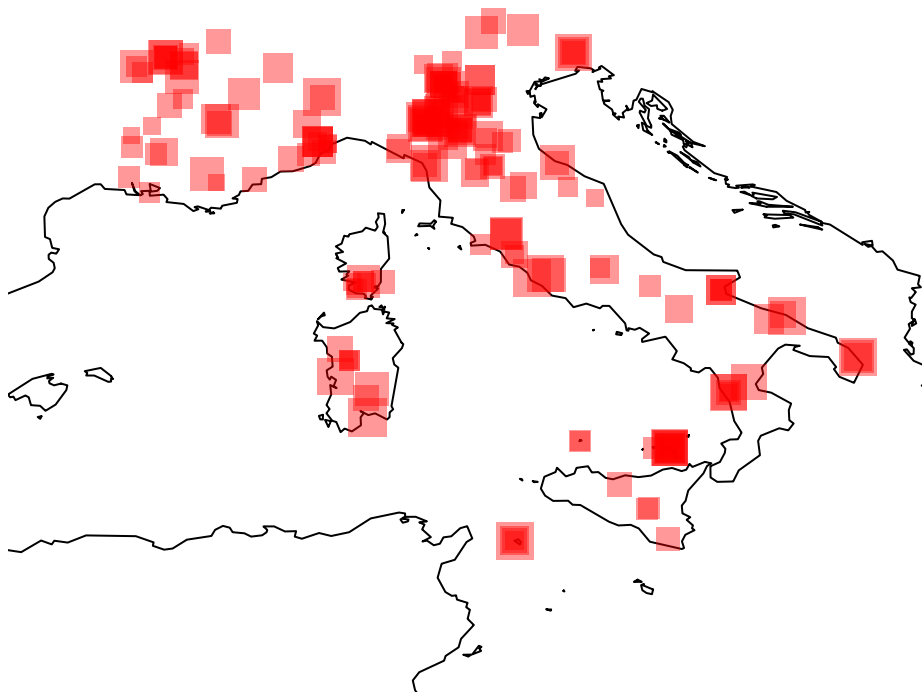



1445 cal. BC

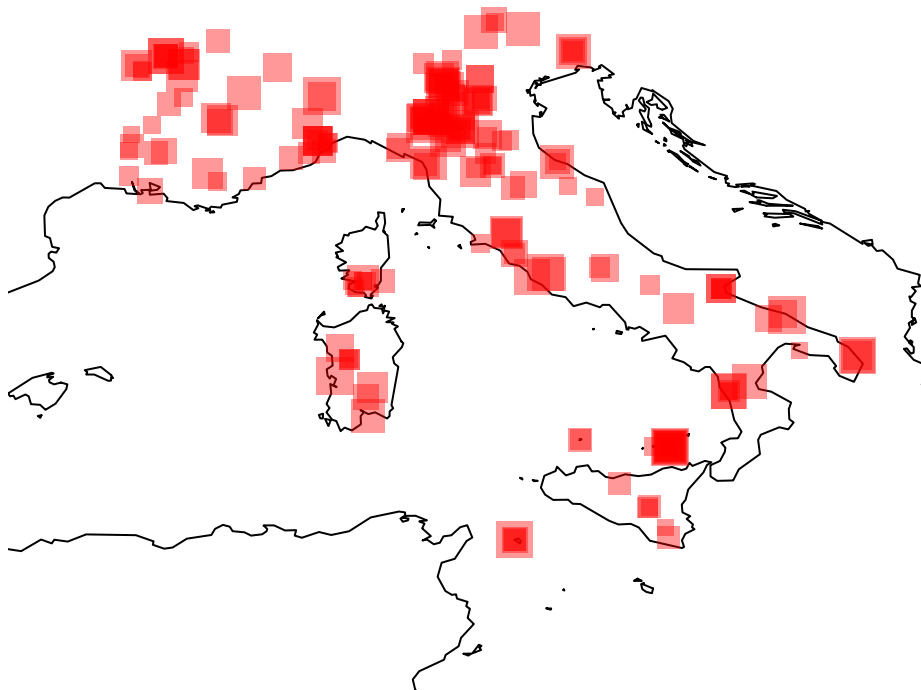

1440 cal. BC

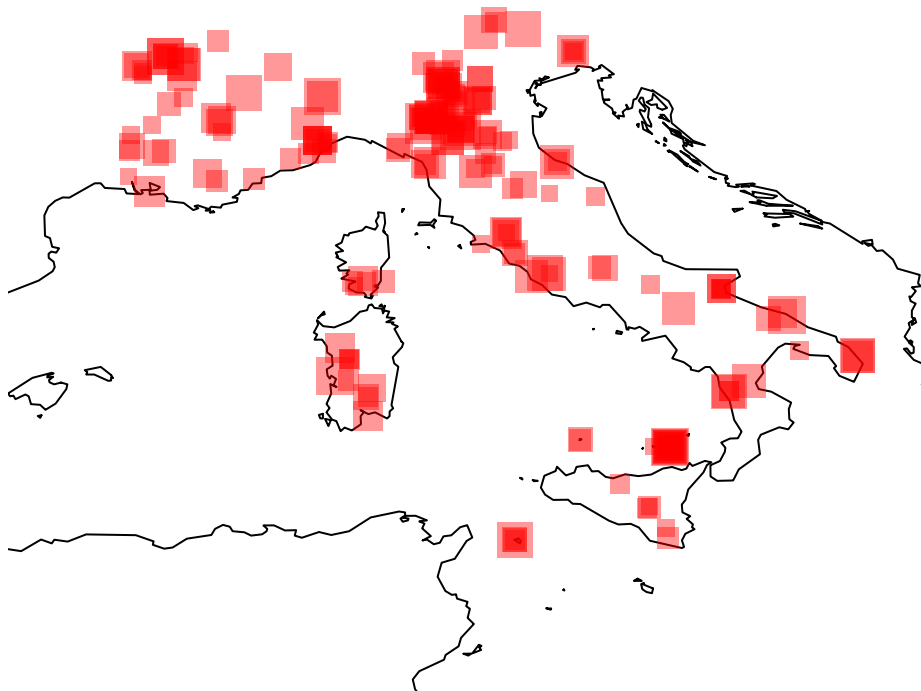

1435 cal. BC

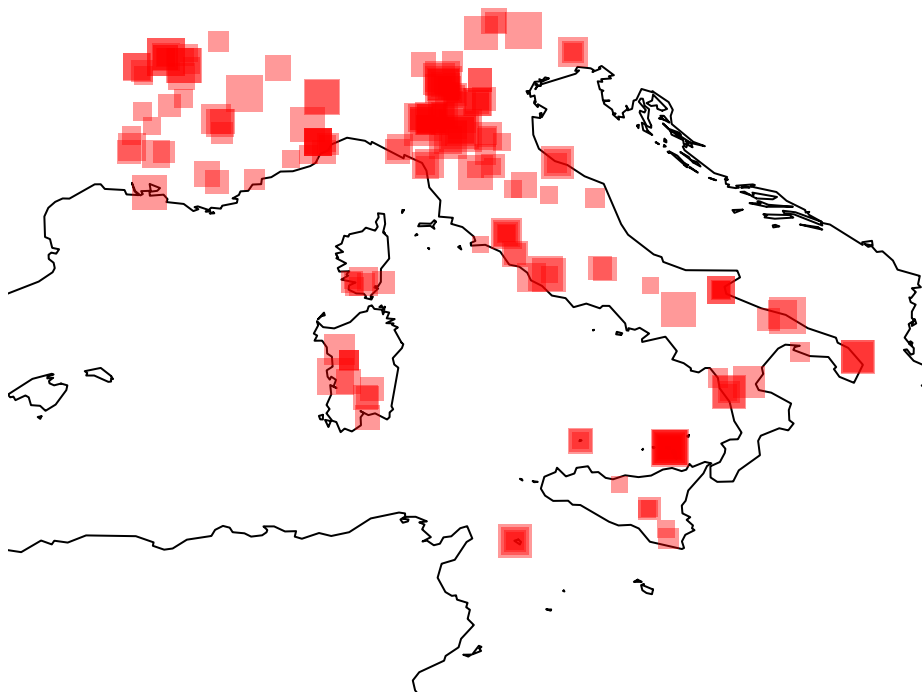

1430 cal. BC

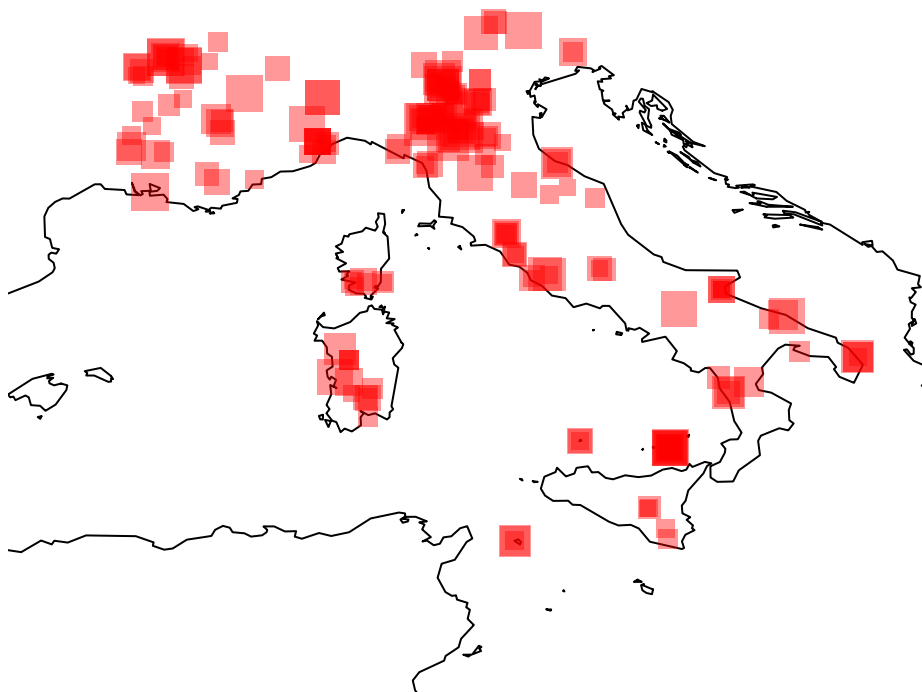

1425 cal. BC

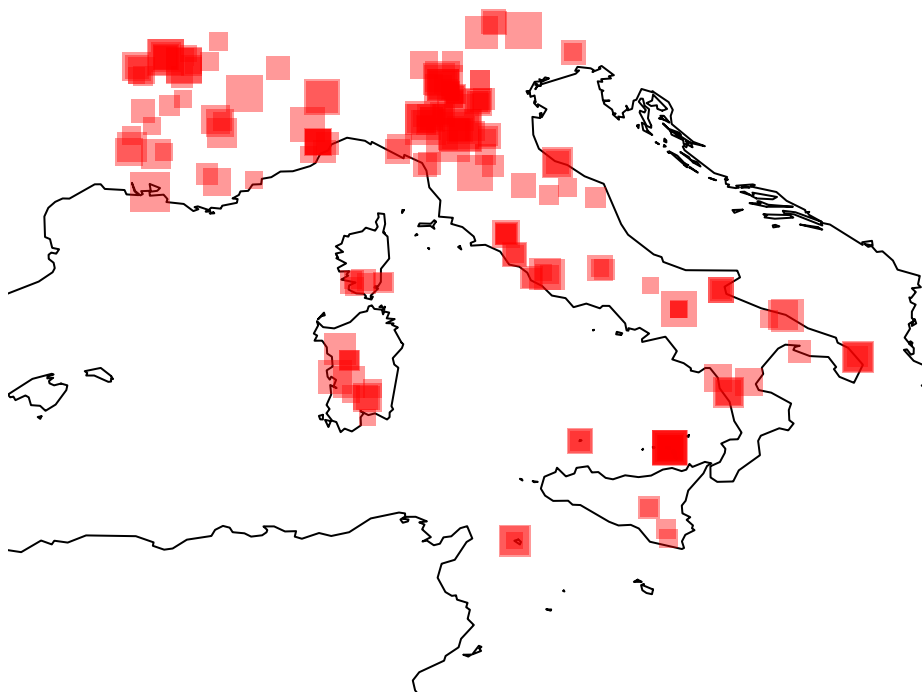

1420 cal. BC

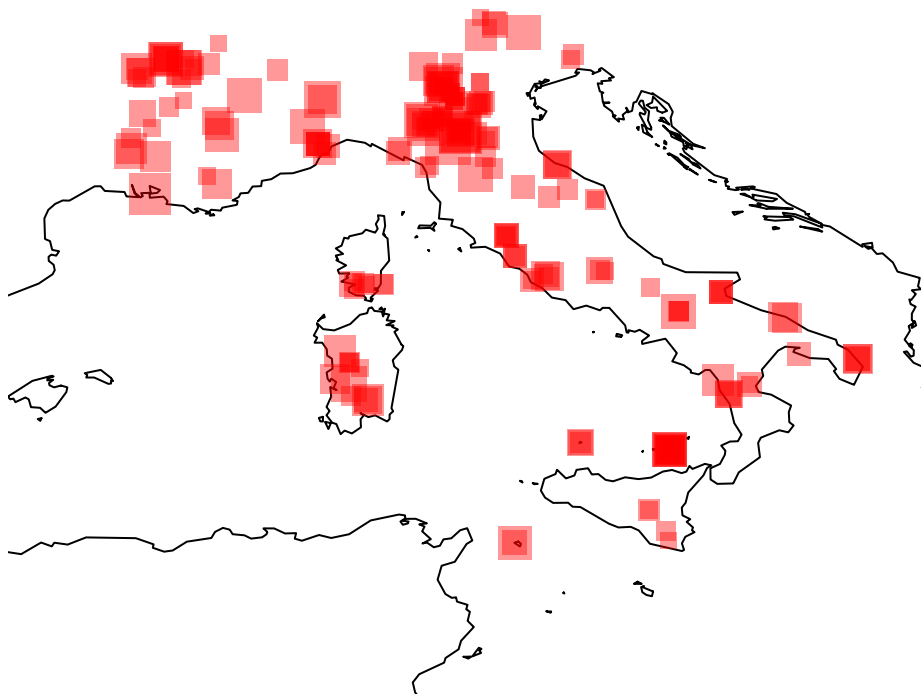

1415 cal. BC

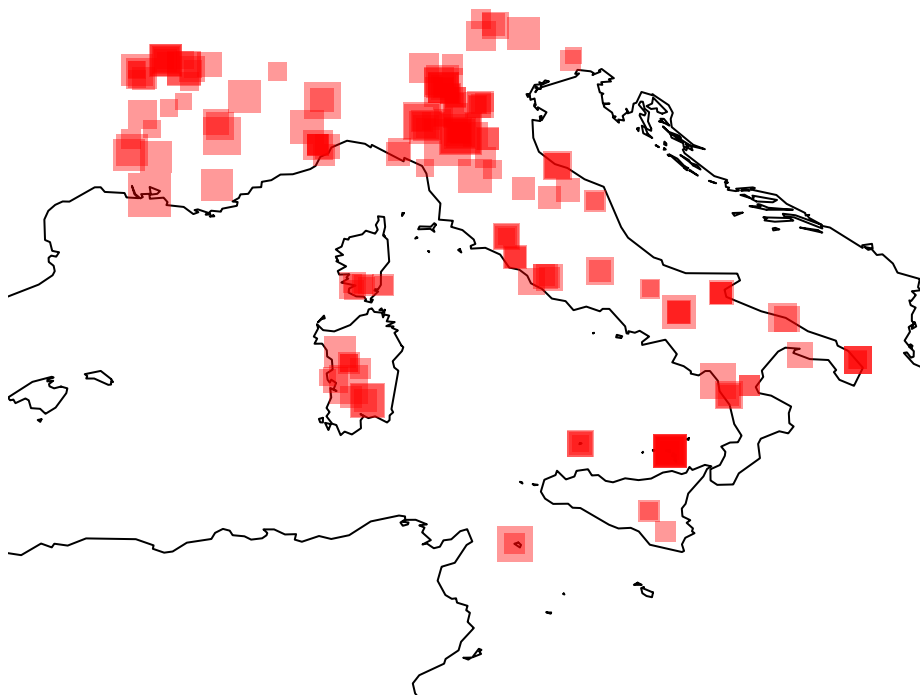

1410 cal. BC

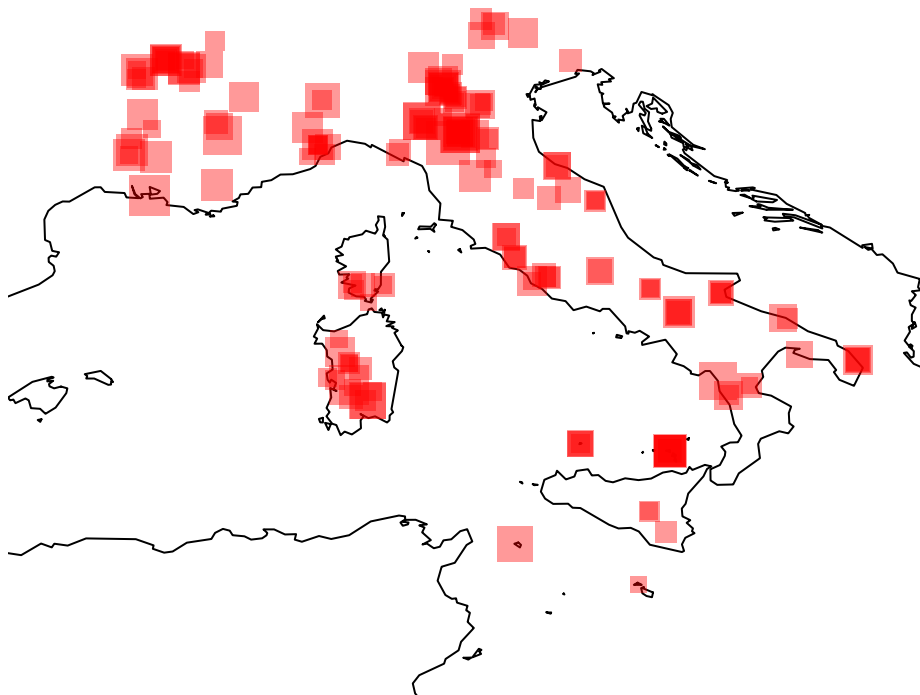



1405 cal. BC

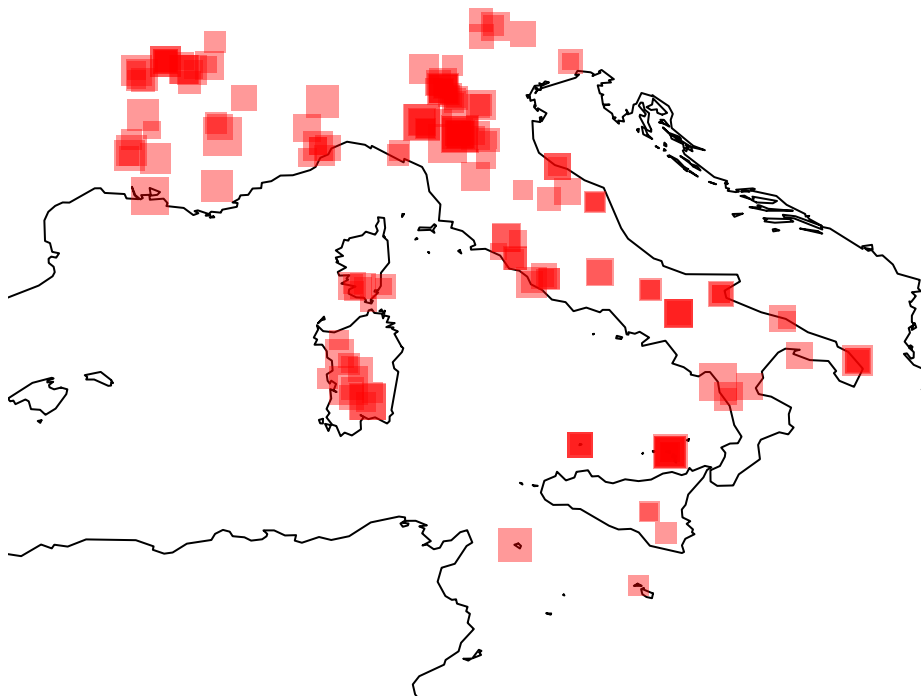

1400 cal. BC

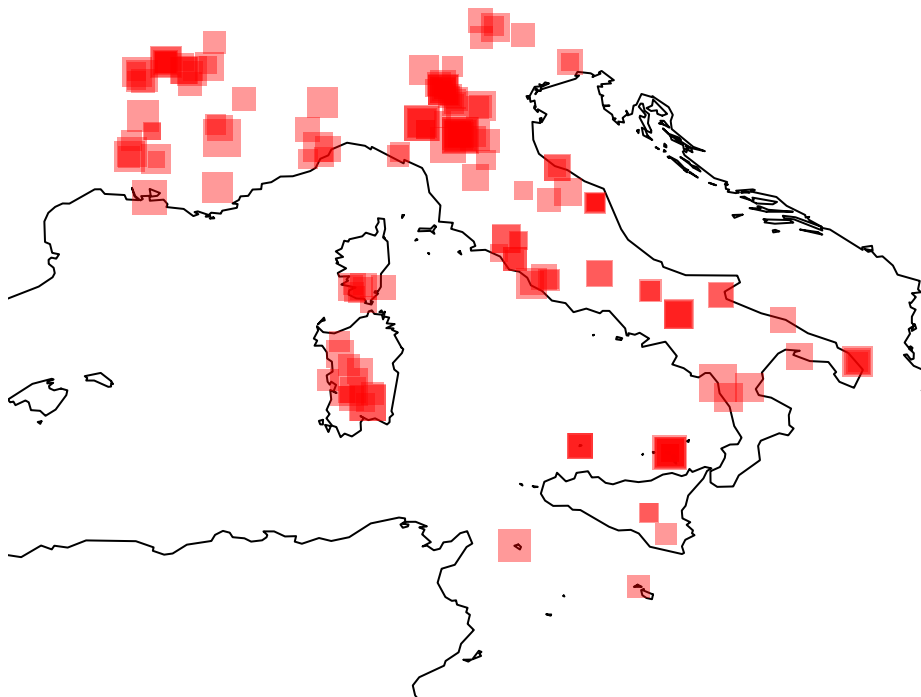

1395 cal. BC

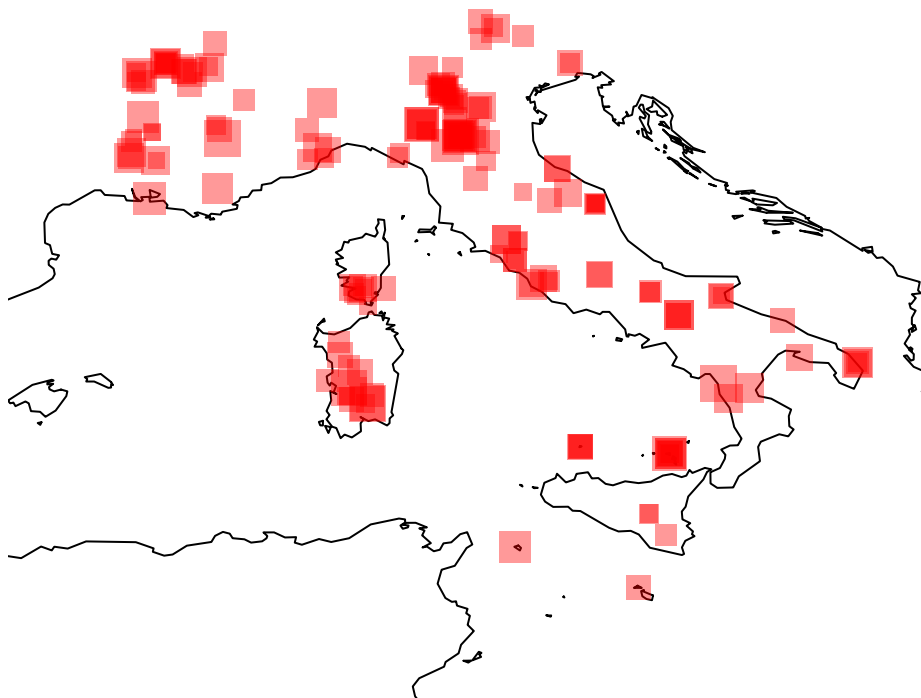

1390 cal. BC

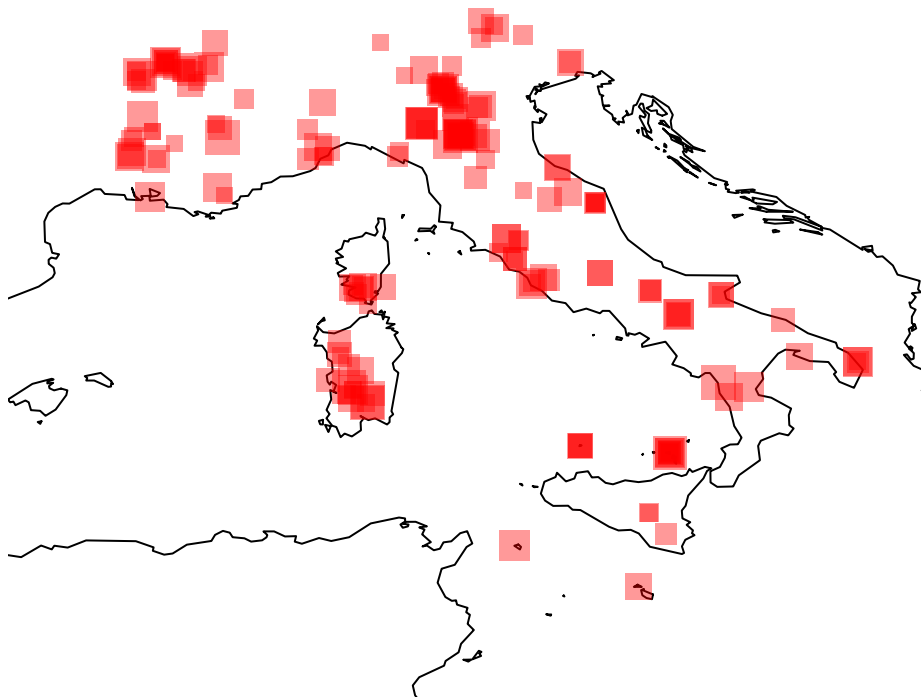

1385 cal. BC

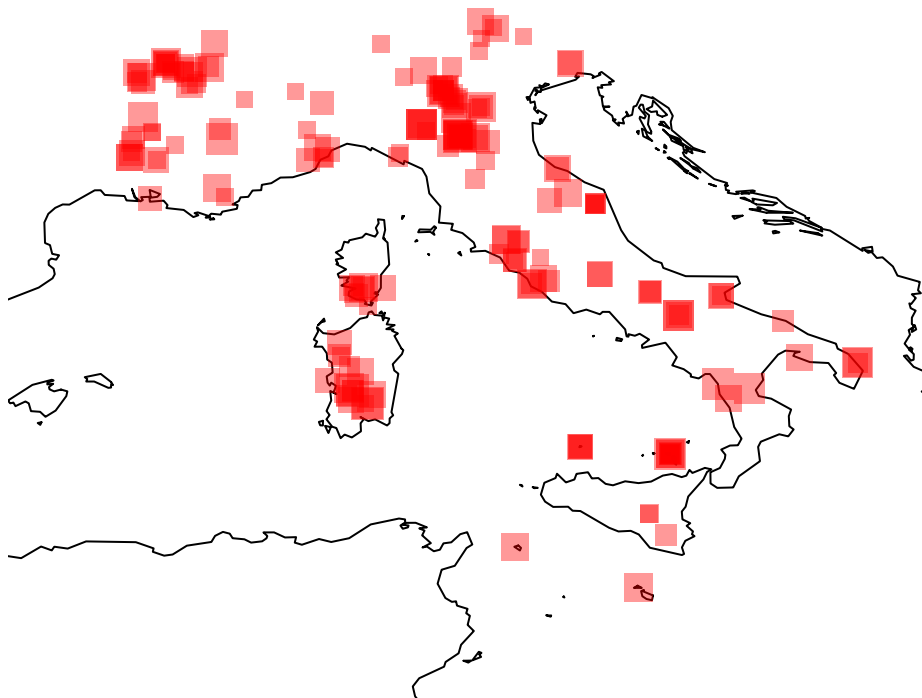

1380 cal. BC

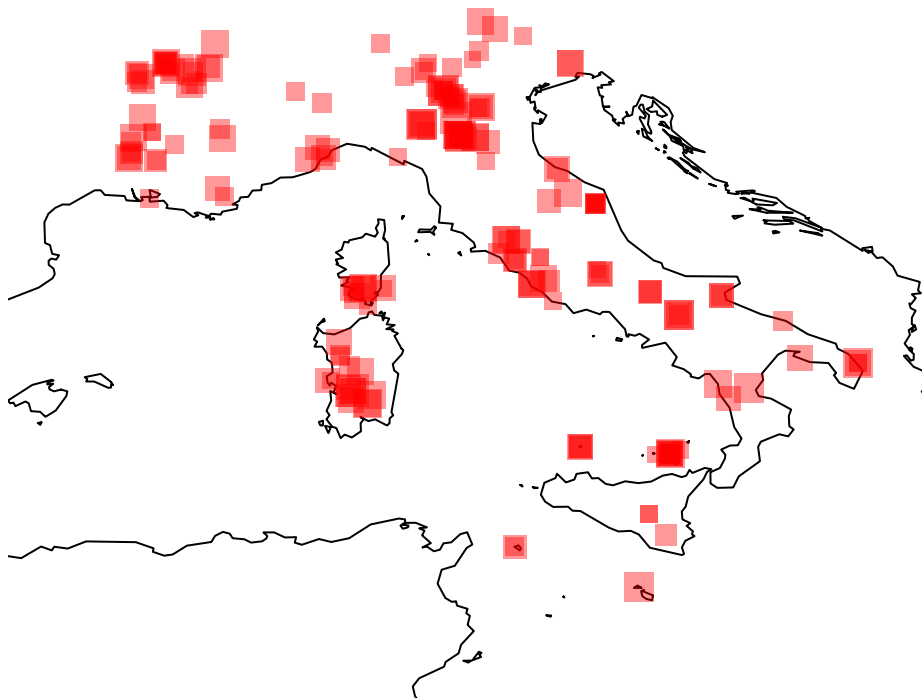

1375 cal. BC

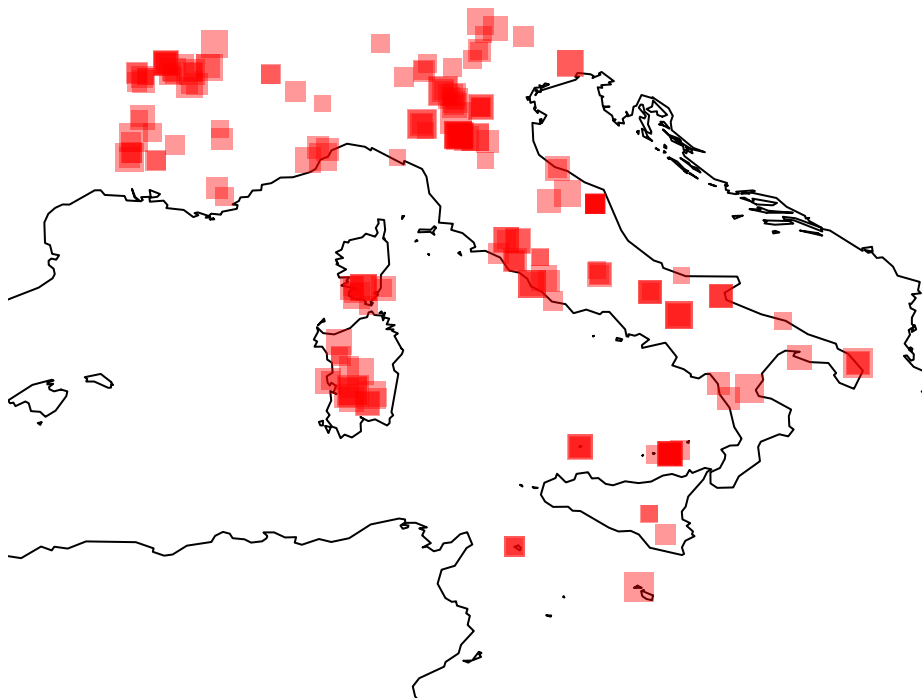

1370 cal. BC

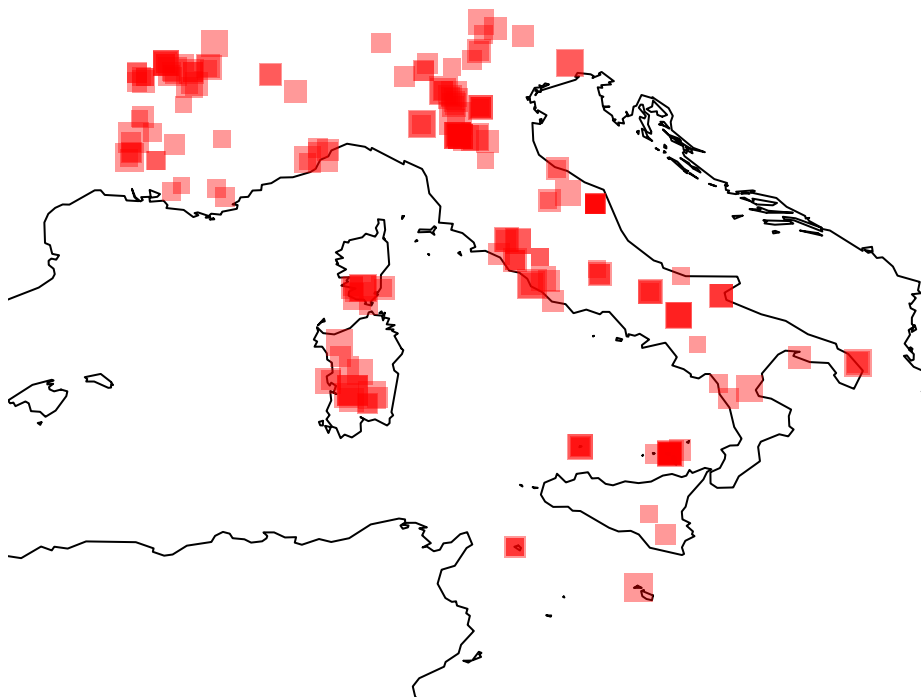



1365 cal. BC

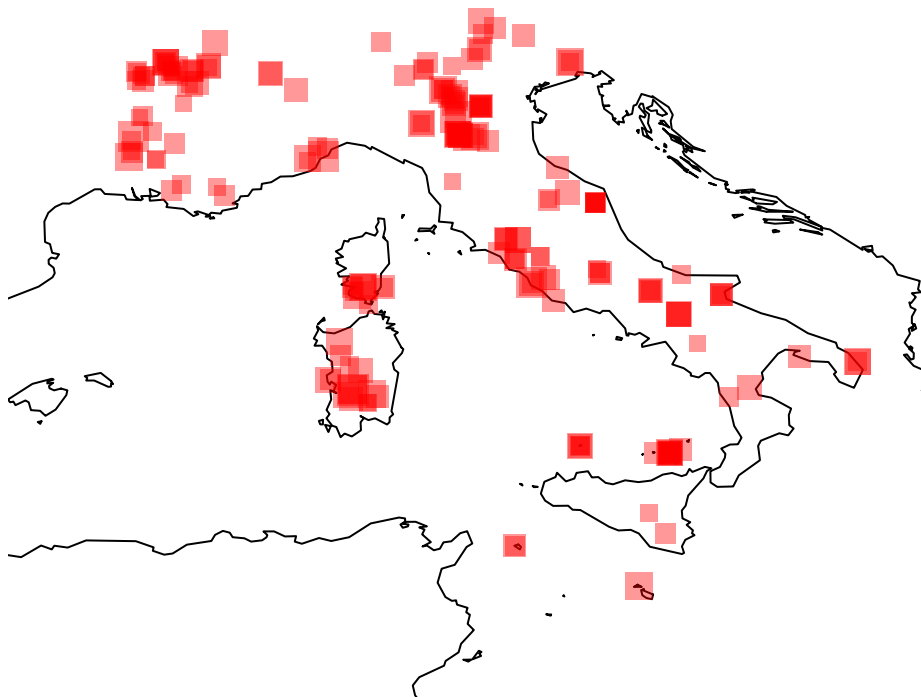

1360 cal. BC

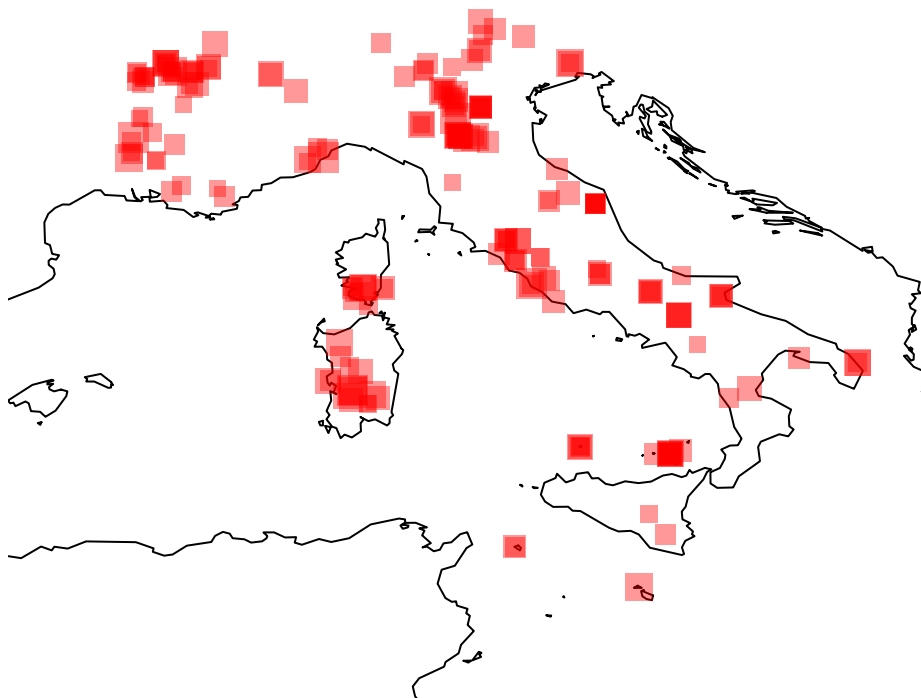

1355 cal. BC

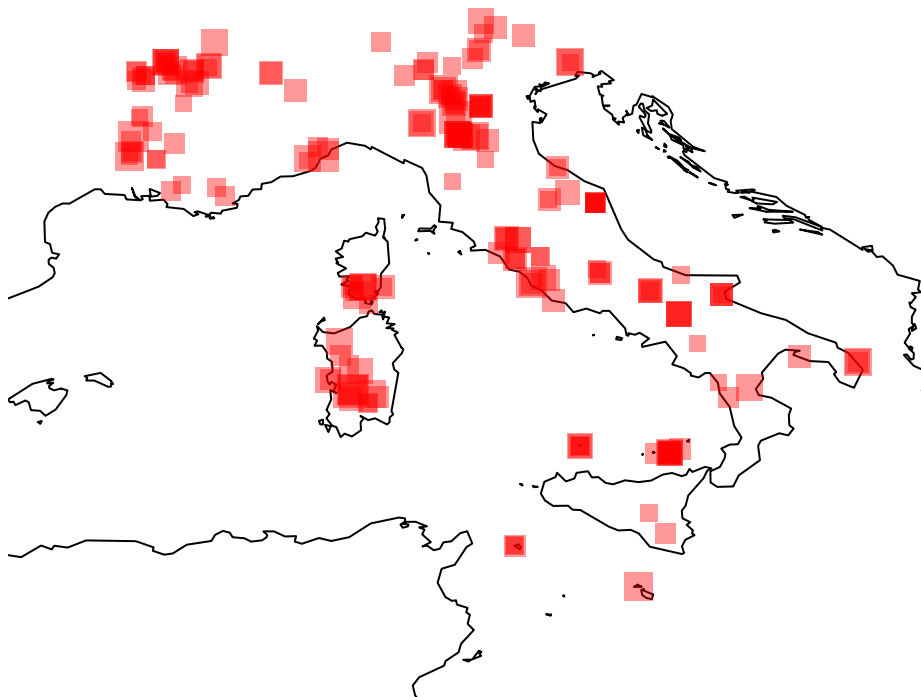

1350 cal. BC

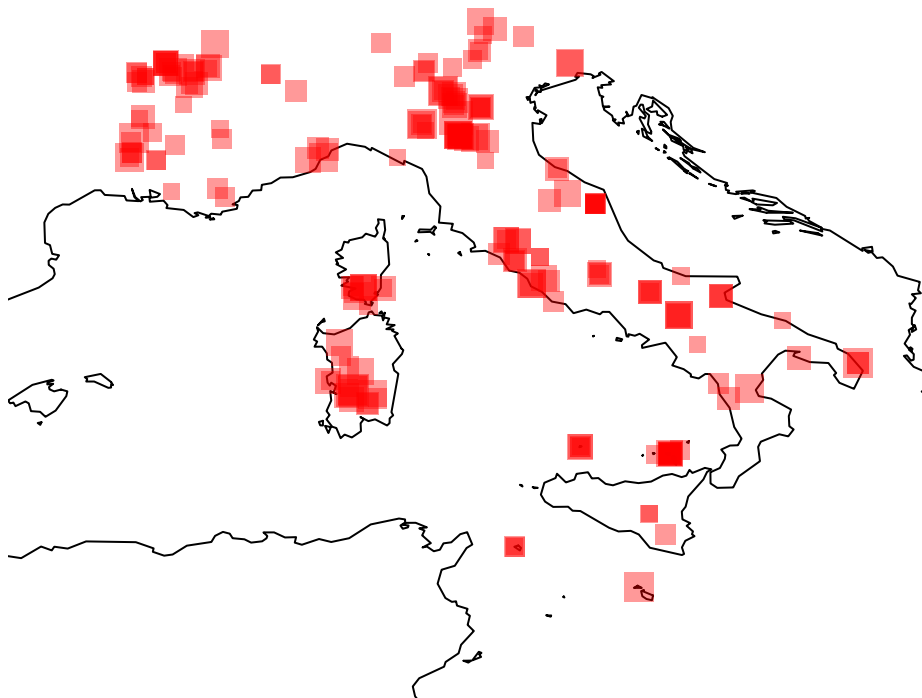

1345 cal. BC

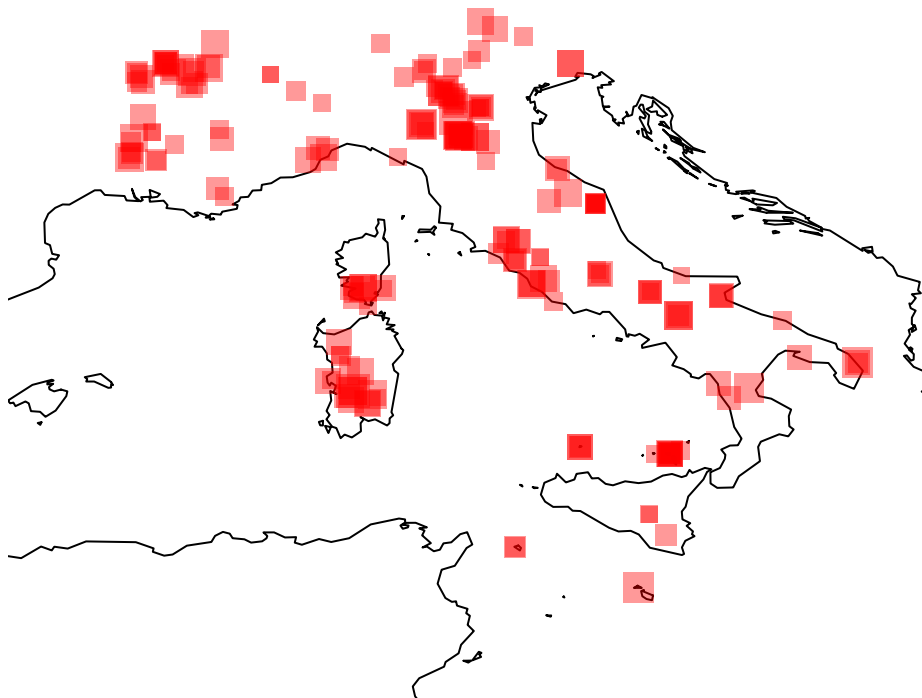

1340 cal. BC

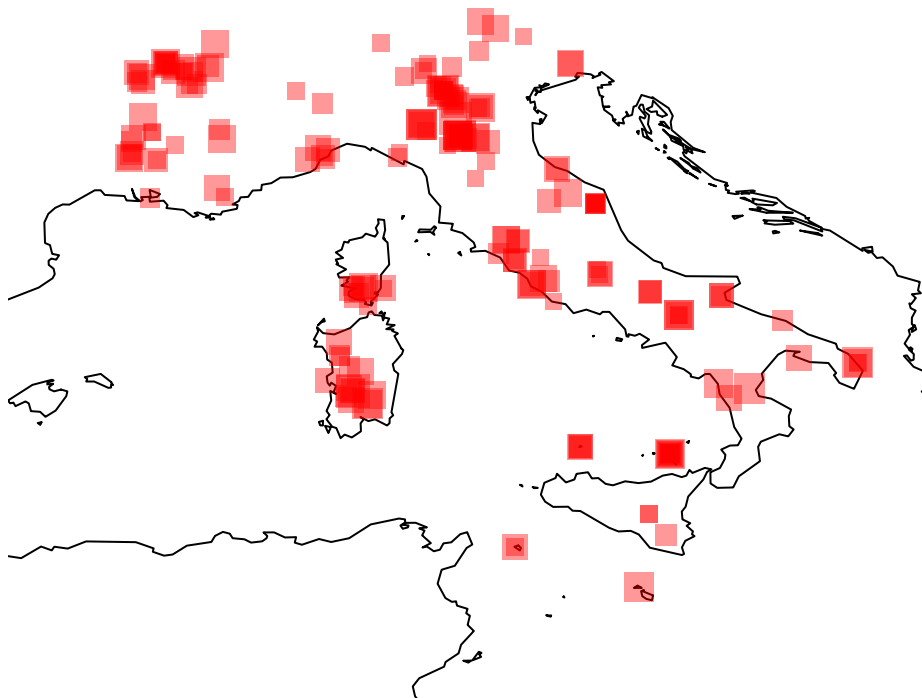

1335 cal. BC

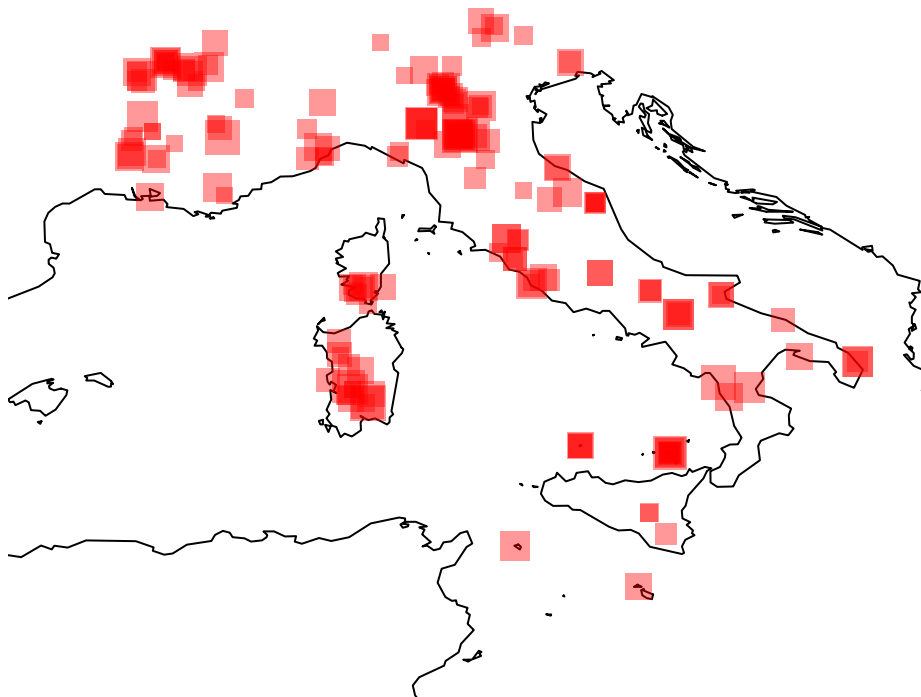

1330 cal. BC

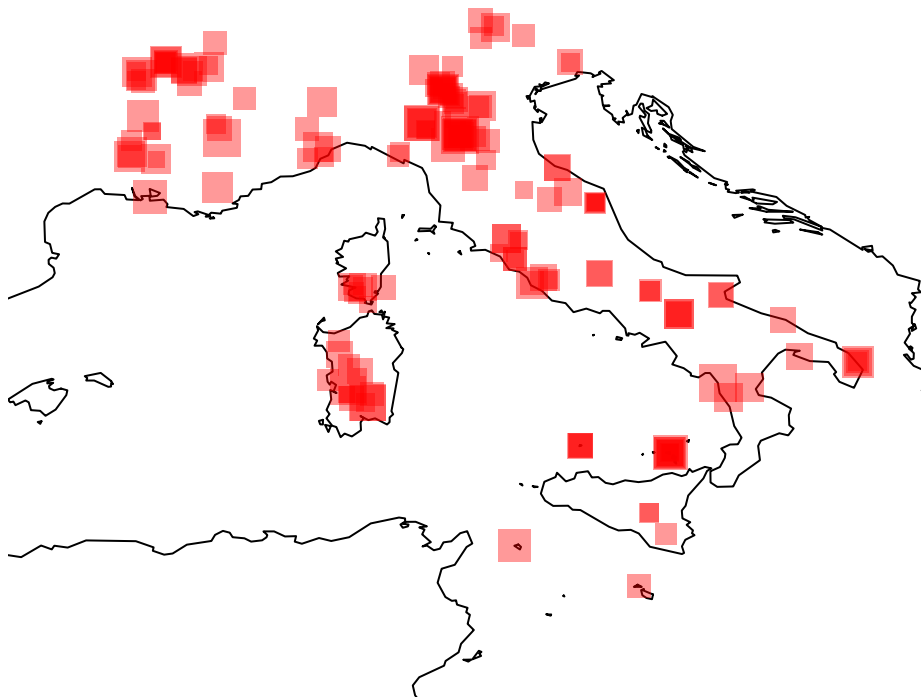



1325 cal. BC

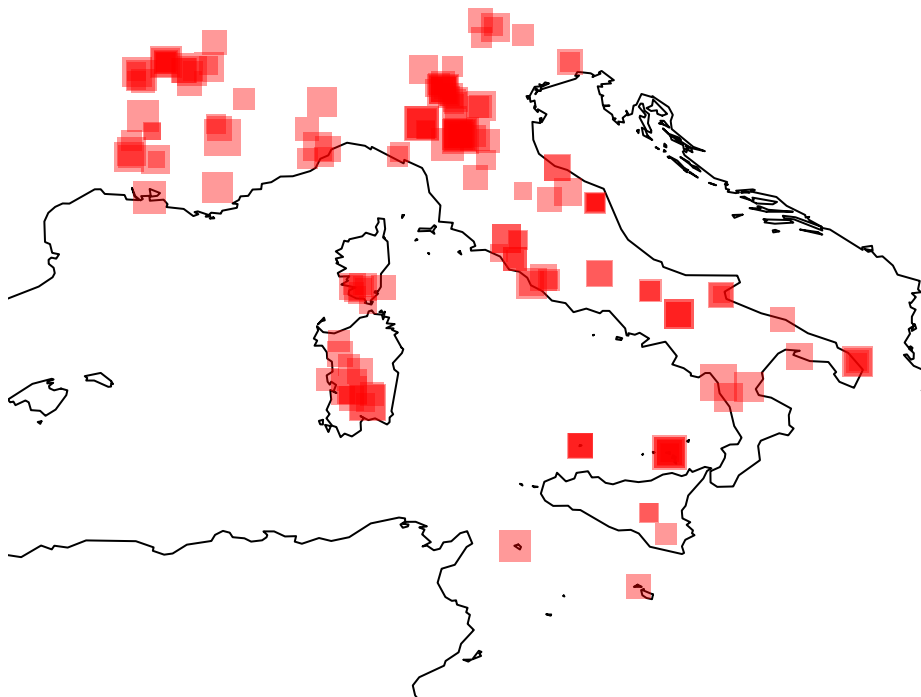

1320 cal. BC

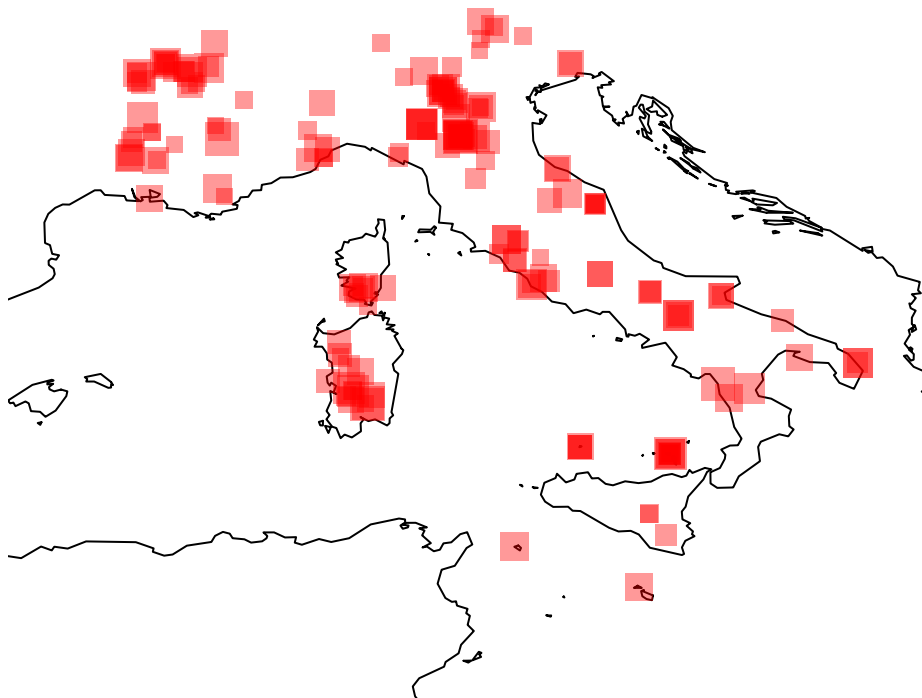

1315 cal. BC

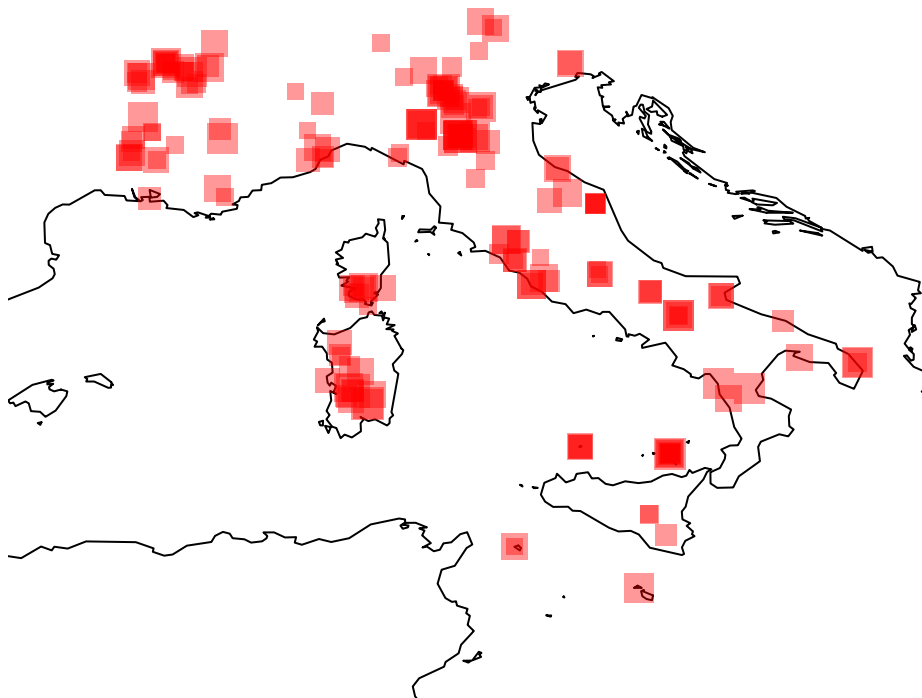

1310 cal. BC

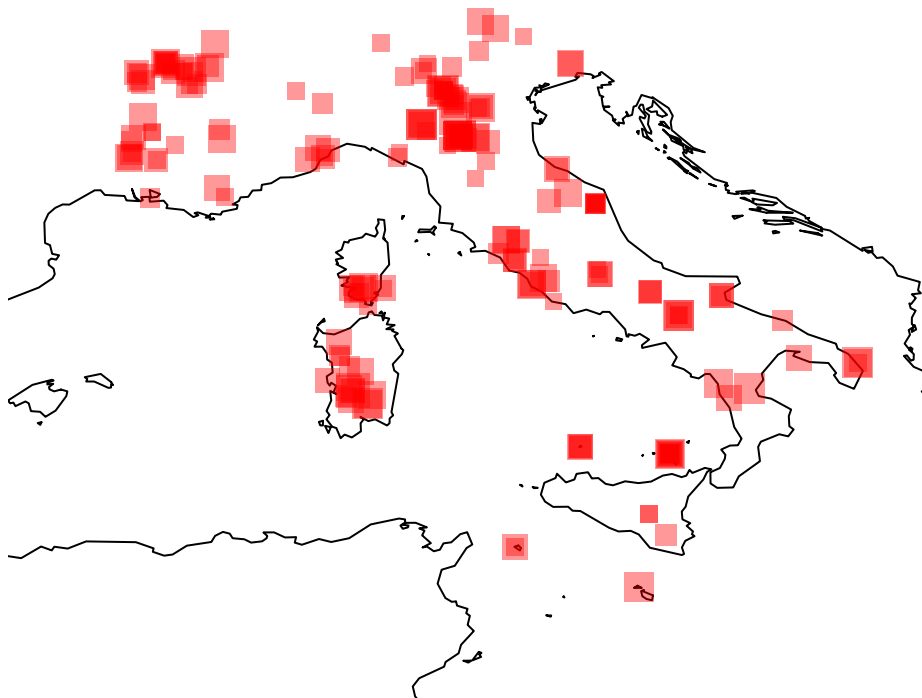

1305 cal. BC

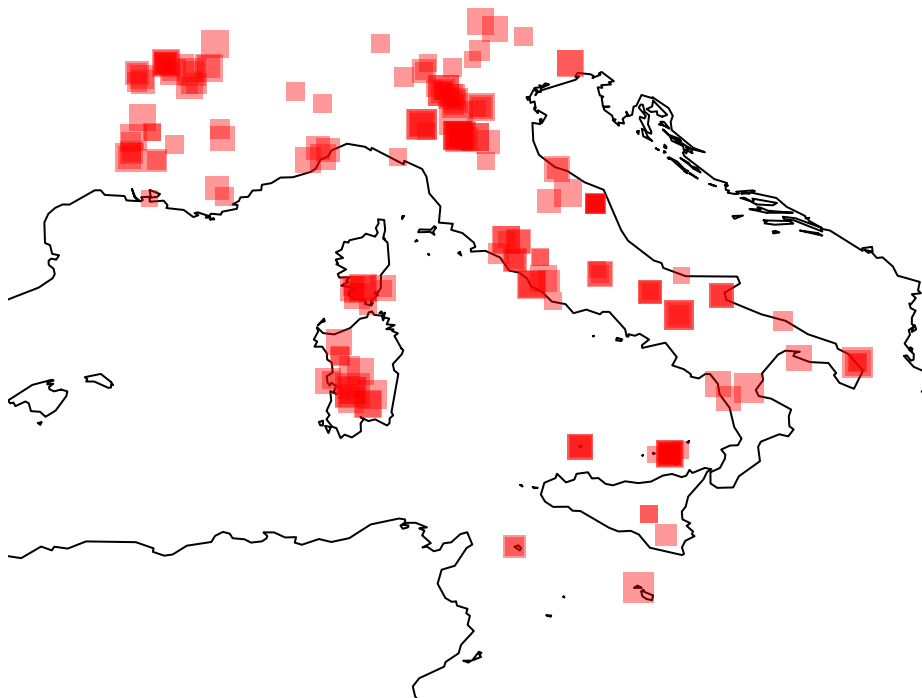

1300 cal. BC

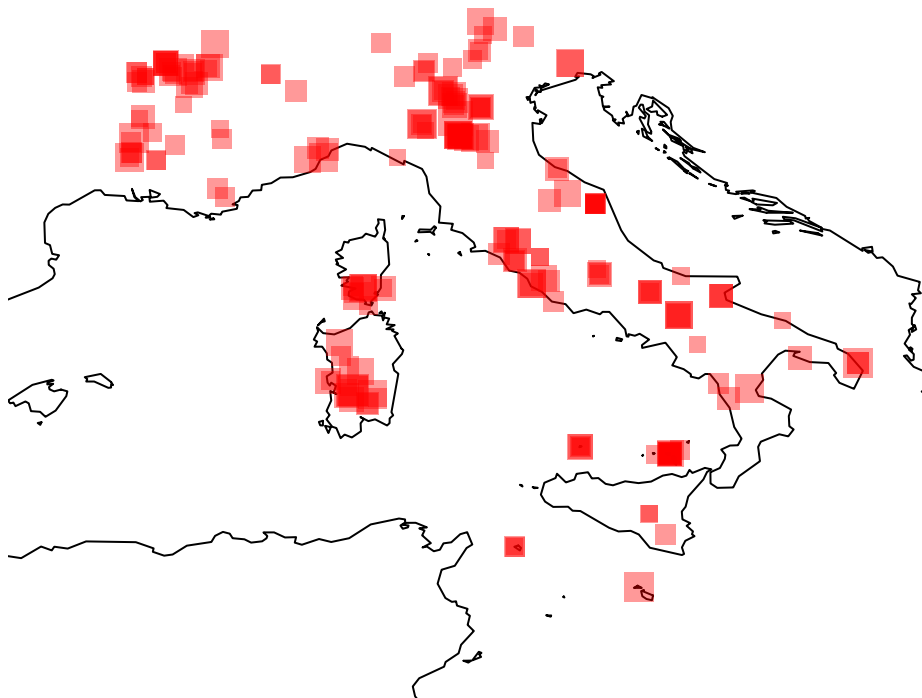

1295 cal. BC

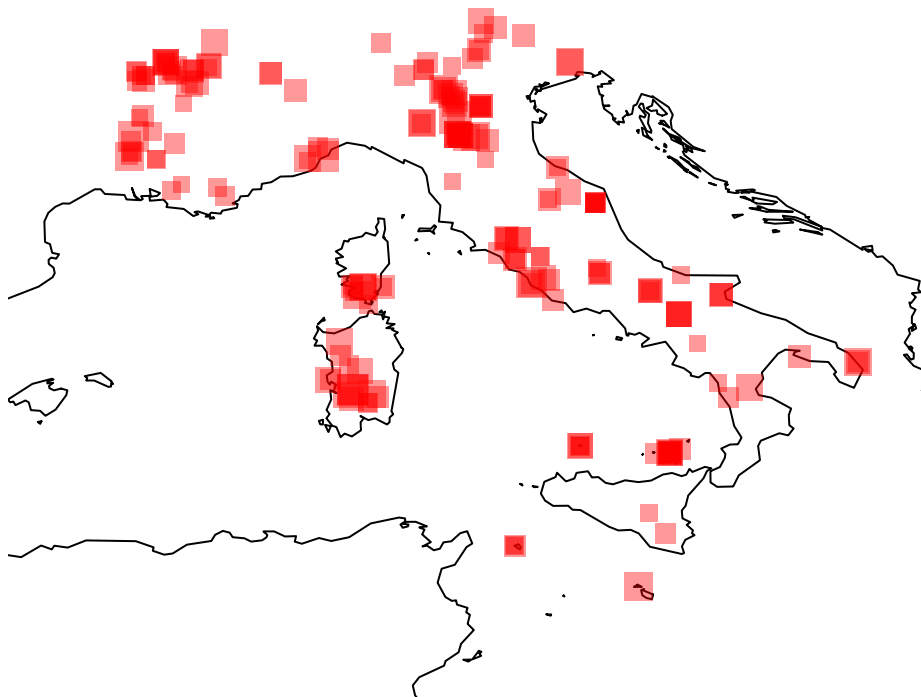

1290 cal. BC

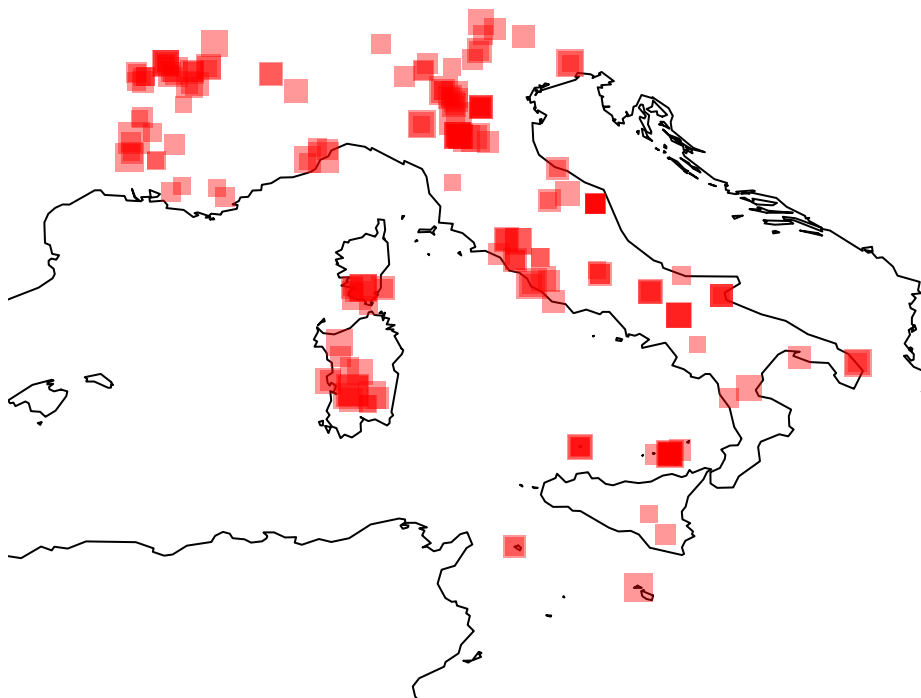



1285 cal. BC

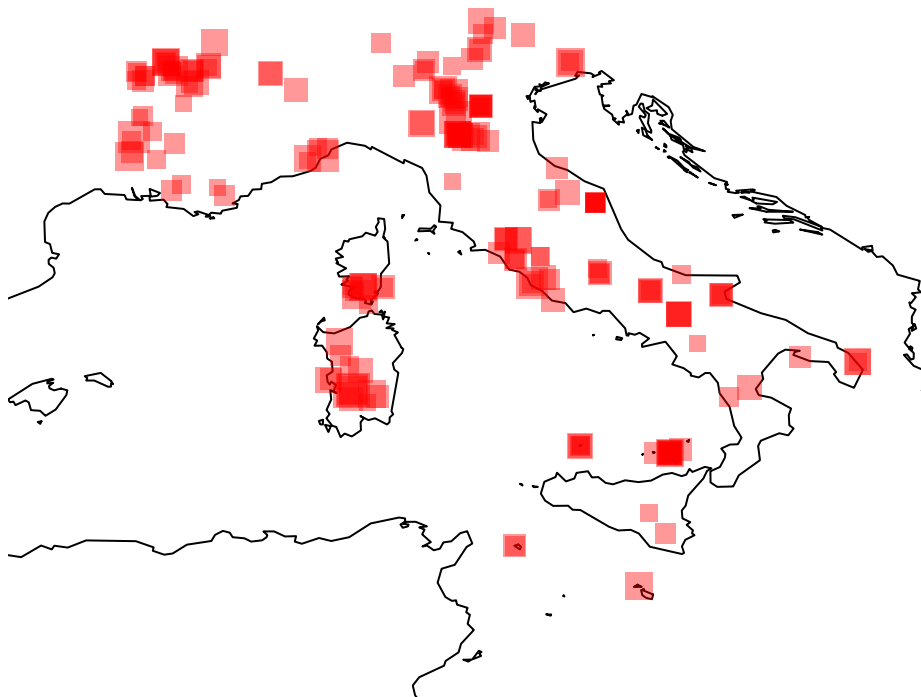

1280 cal. BC

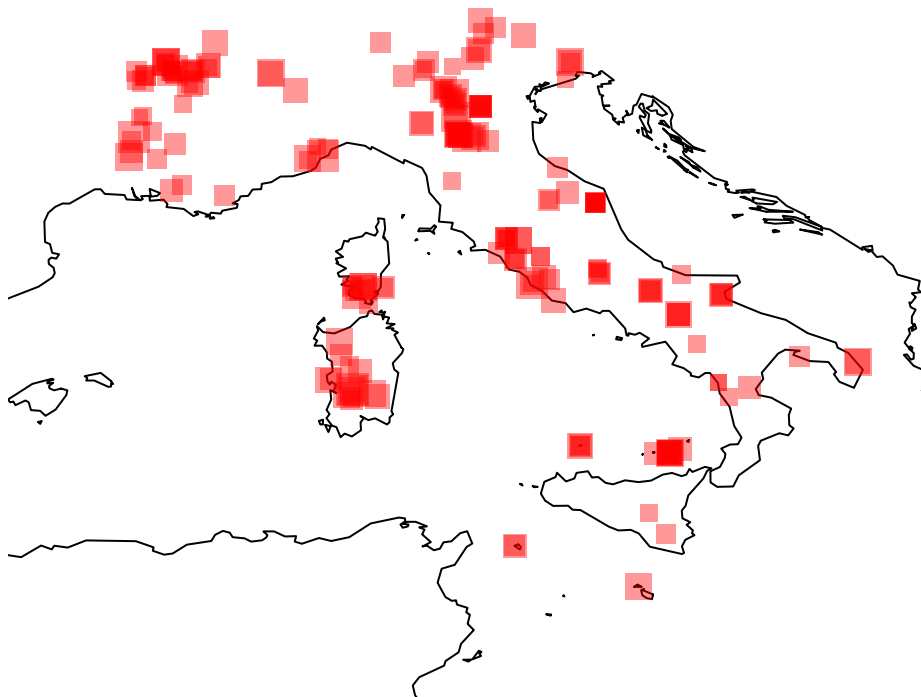

1275 cal. BC

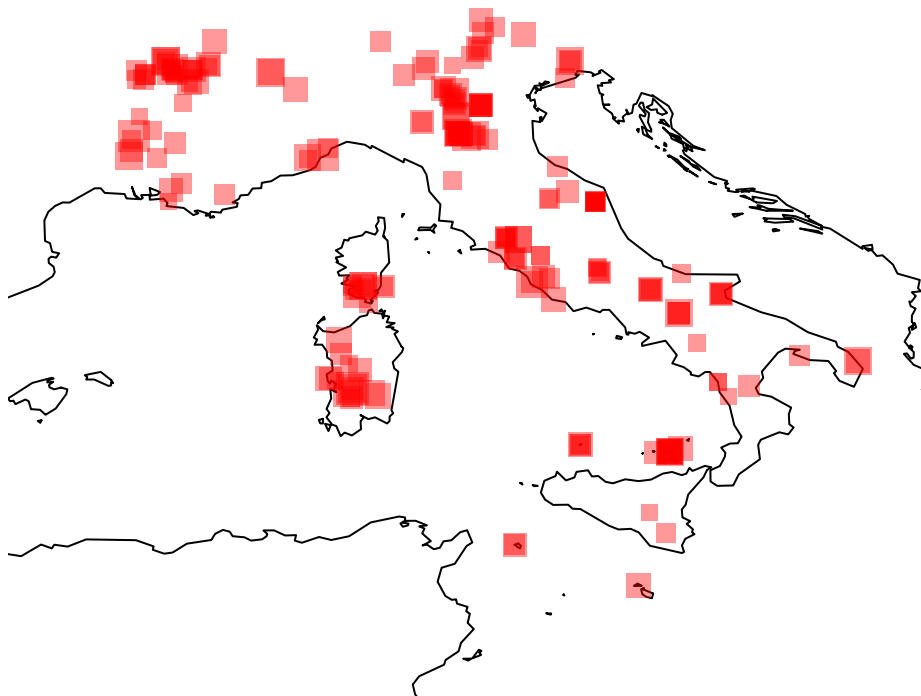

1270 cal. BC

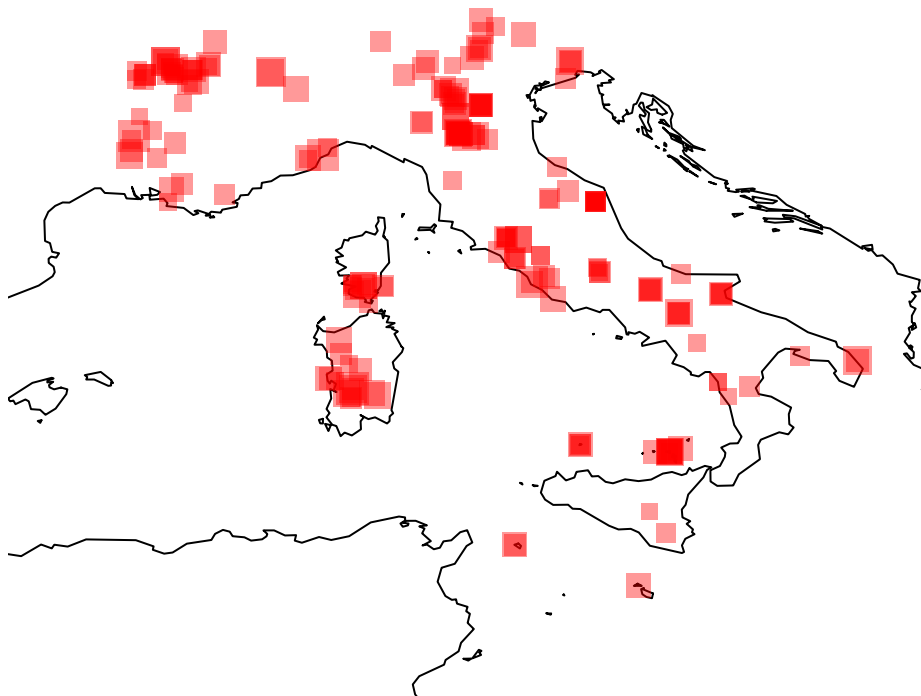

1265 cal. BC

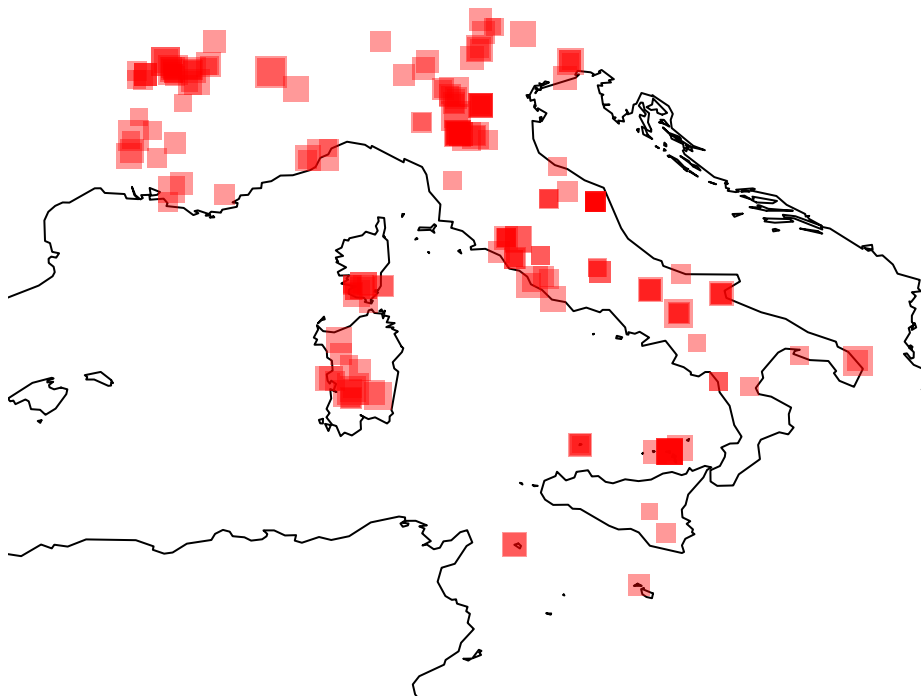

1260 cal. BC

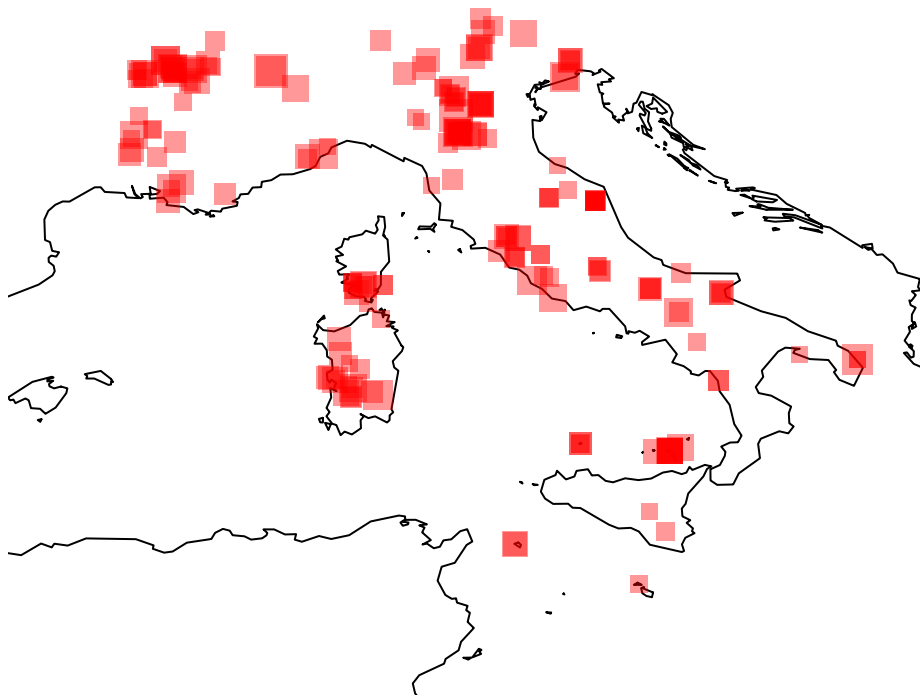

1255 cal. BC

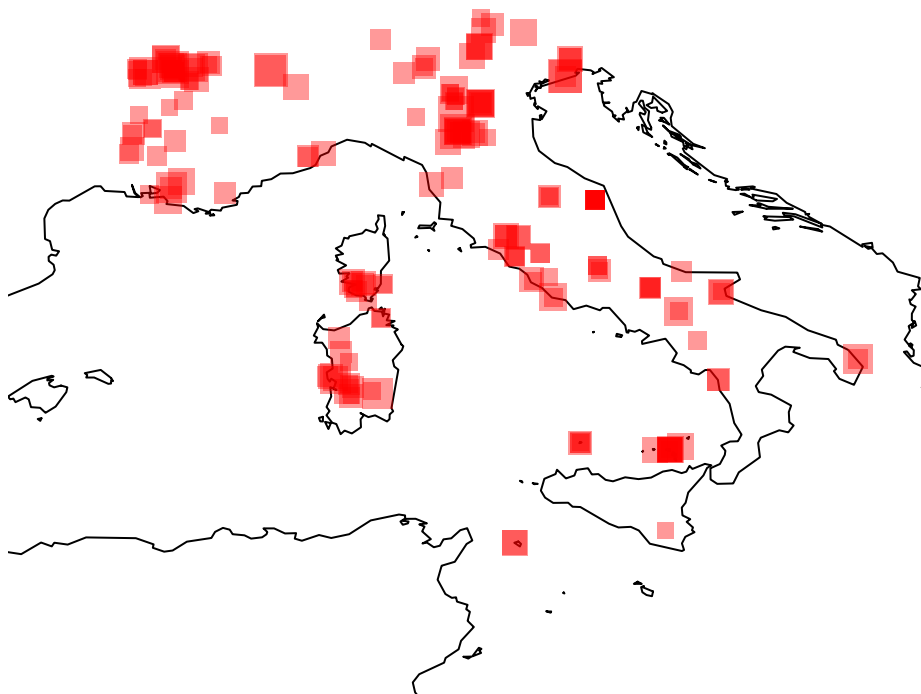

1250 cal. BC

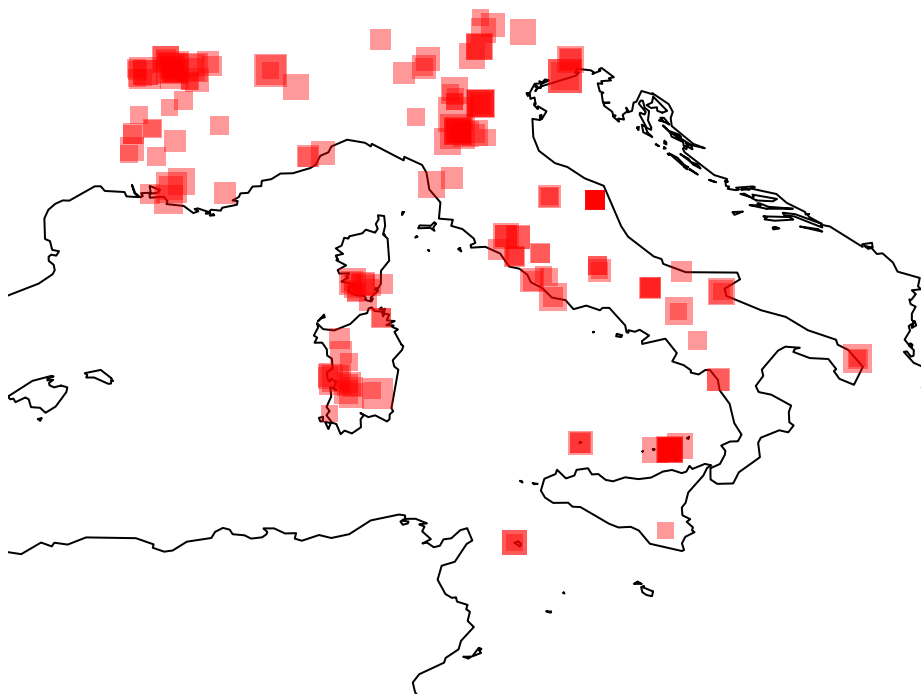



1245 cal. BC

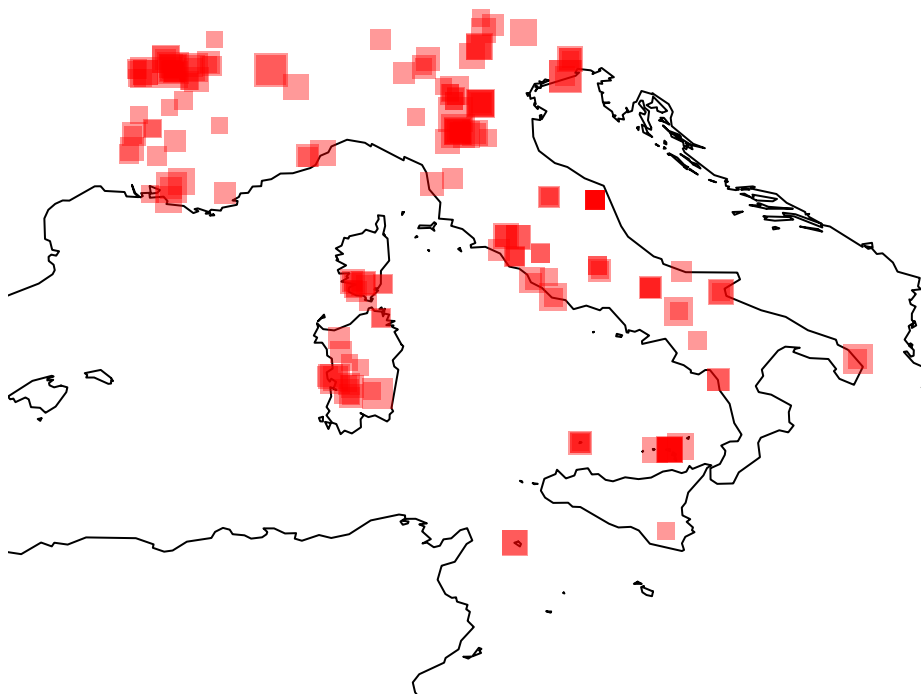

1240 cal. BC

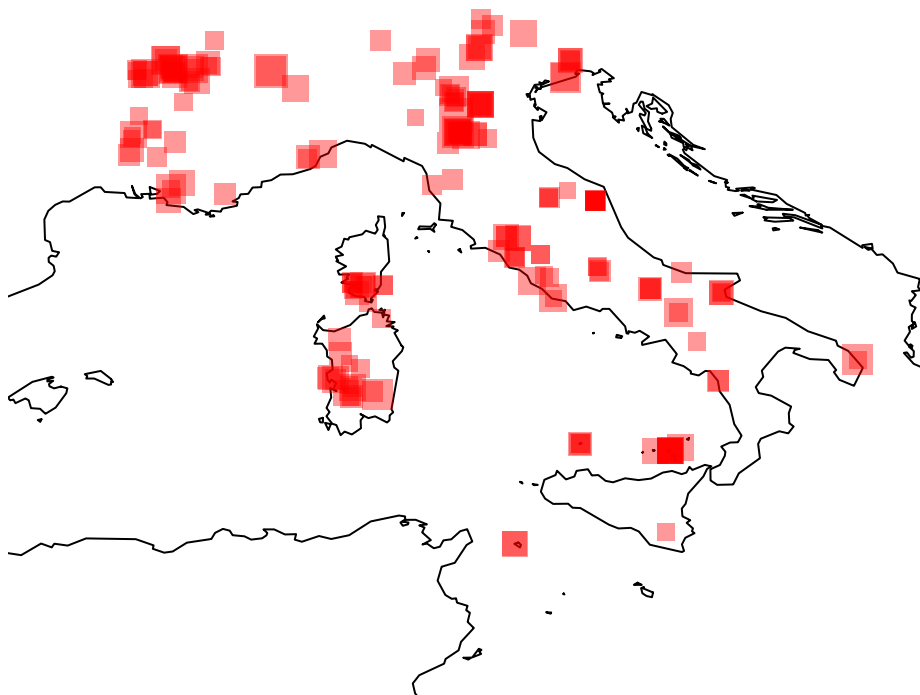

1235 cal. BC

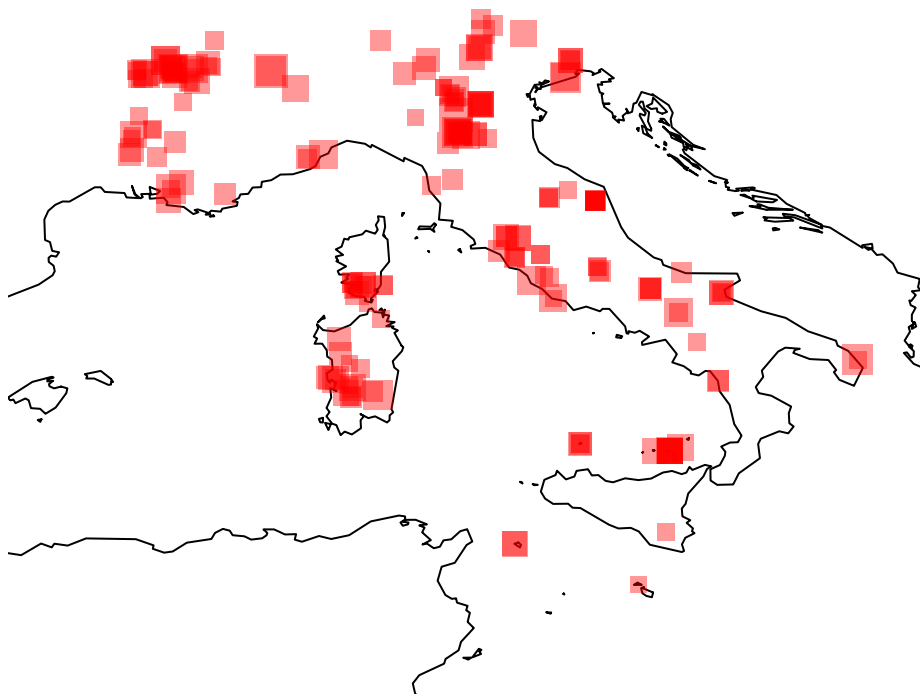

1230 cal. BC

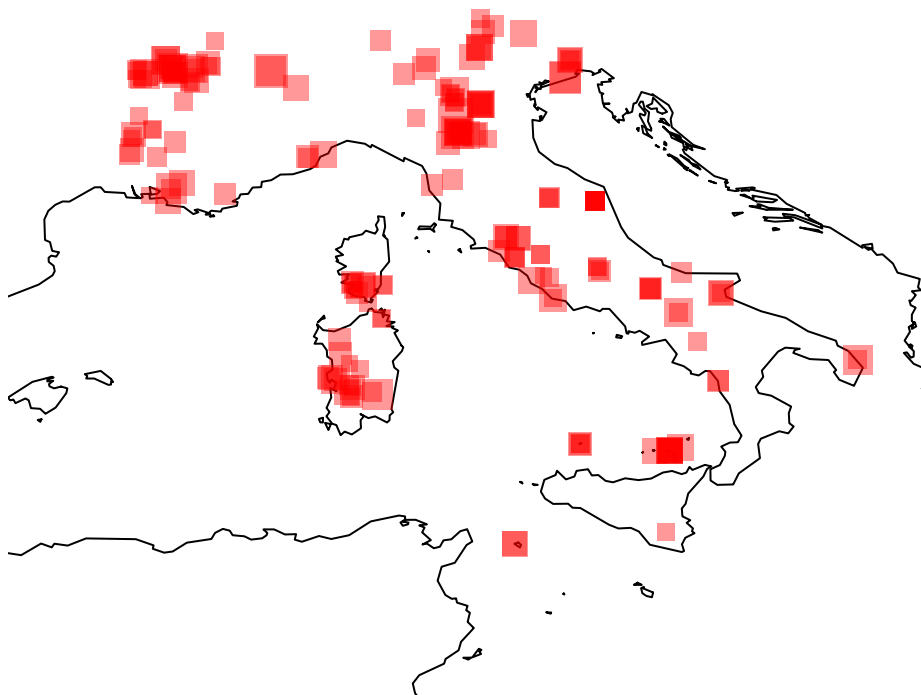

1225 cal. BC

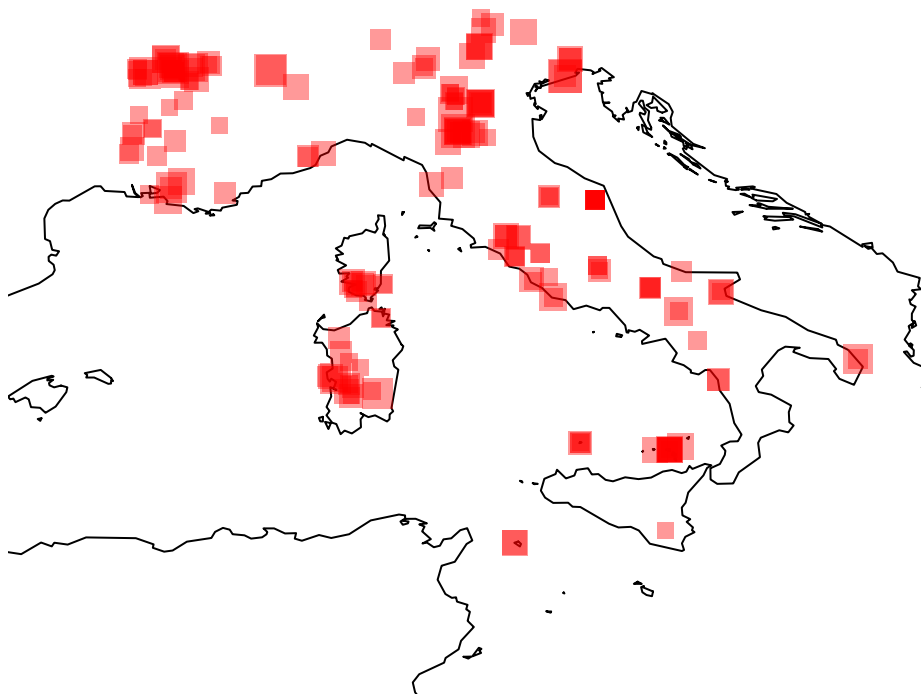

1220 cal. BC

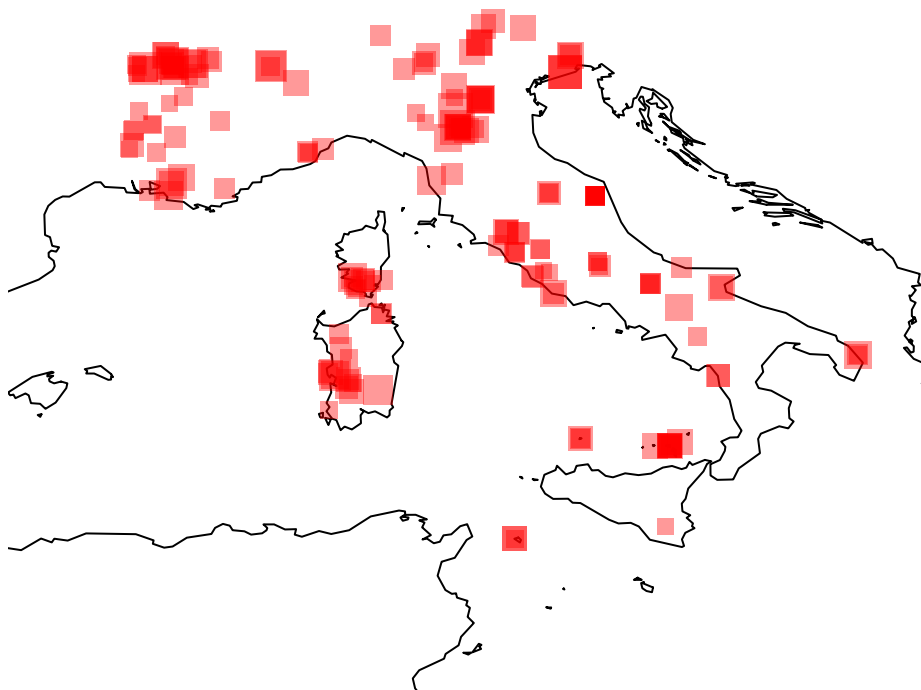

1215 cal. BC

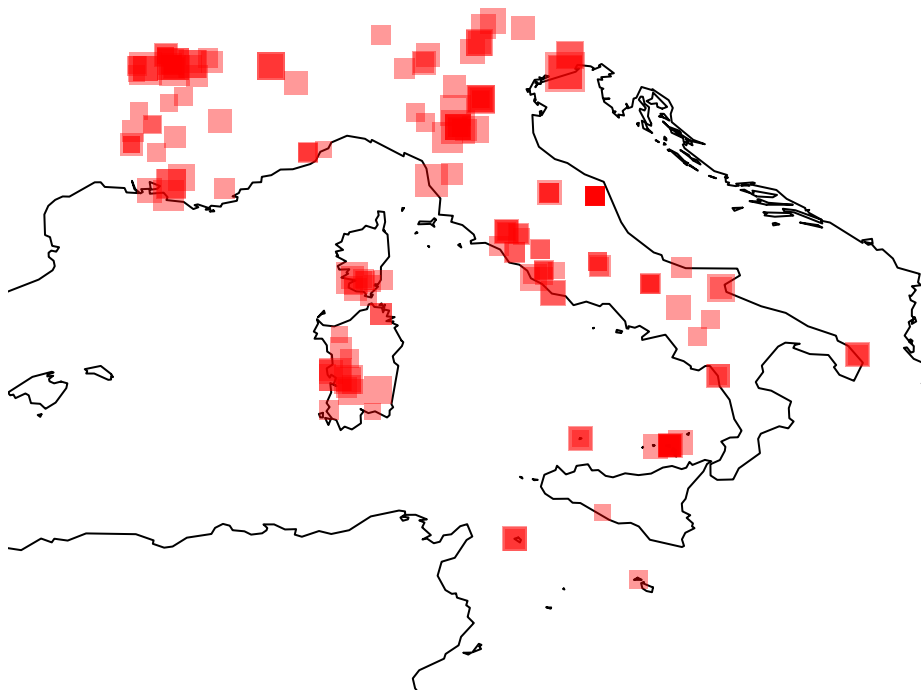

1210 cal. BC

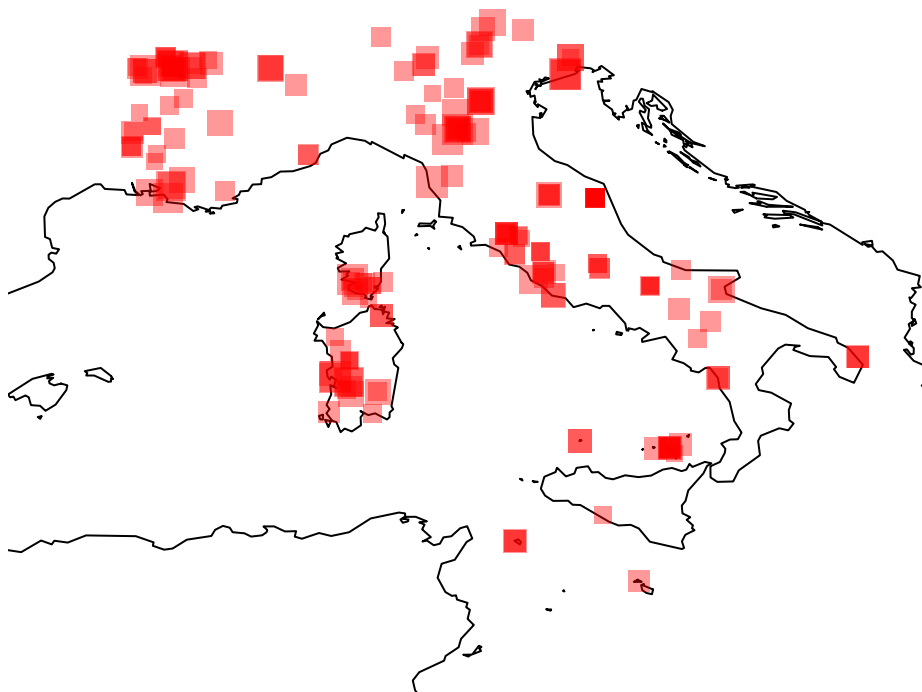



1205 cal. BC

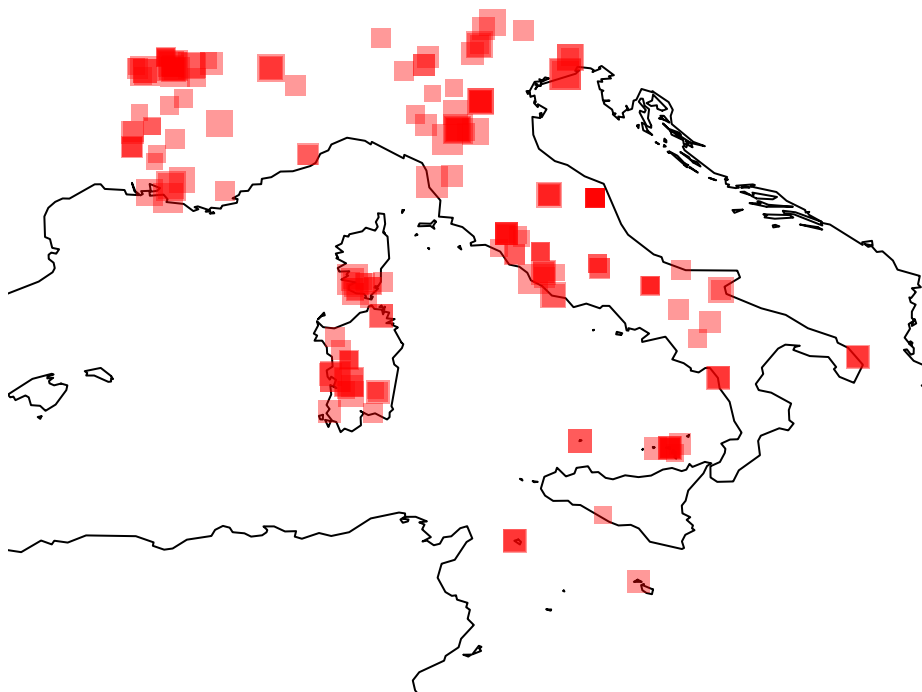

1200 cal. BC

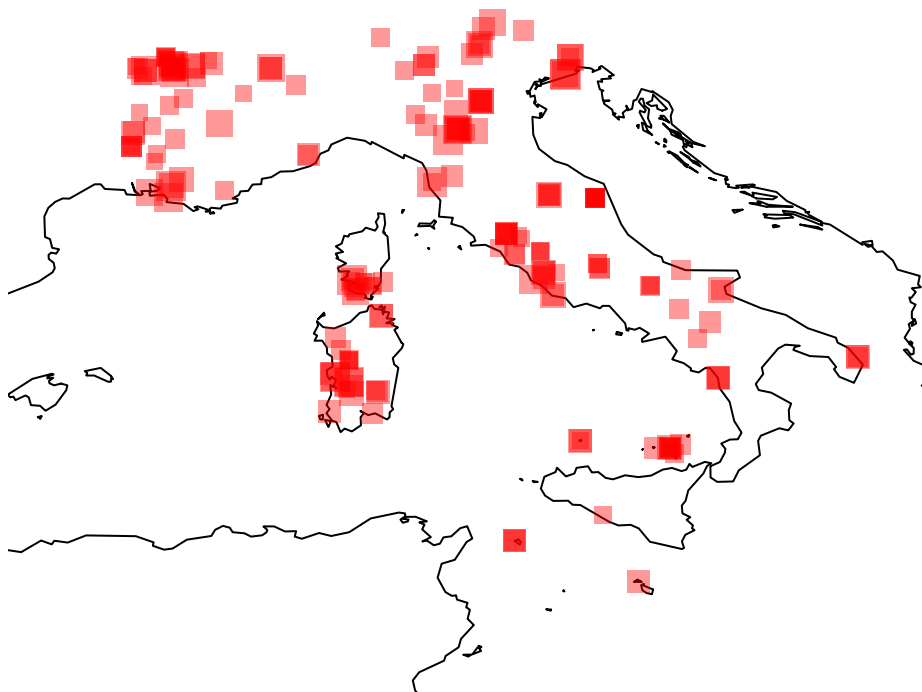

1195 cal. BC

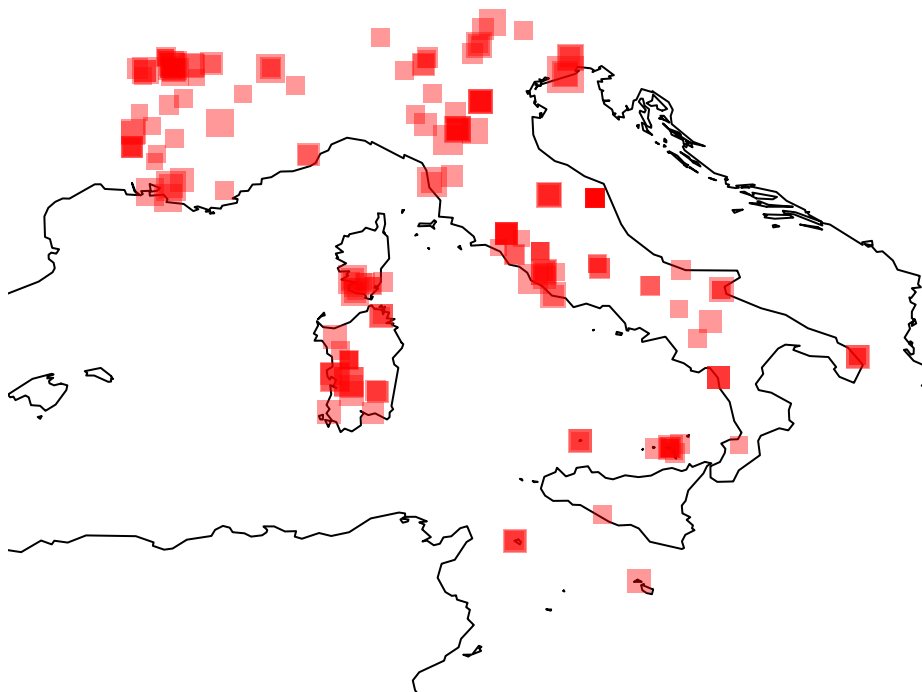

1190 cal. BC

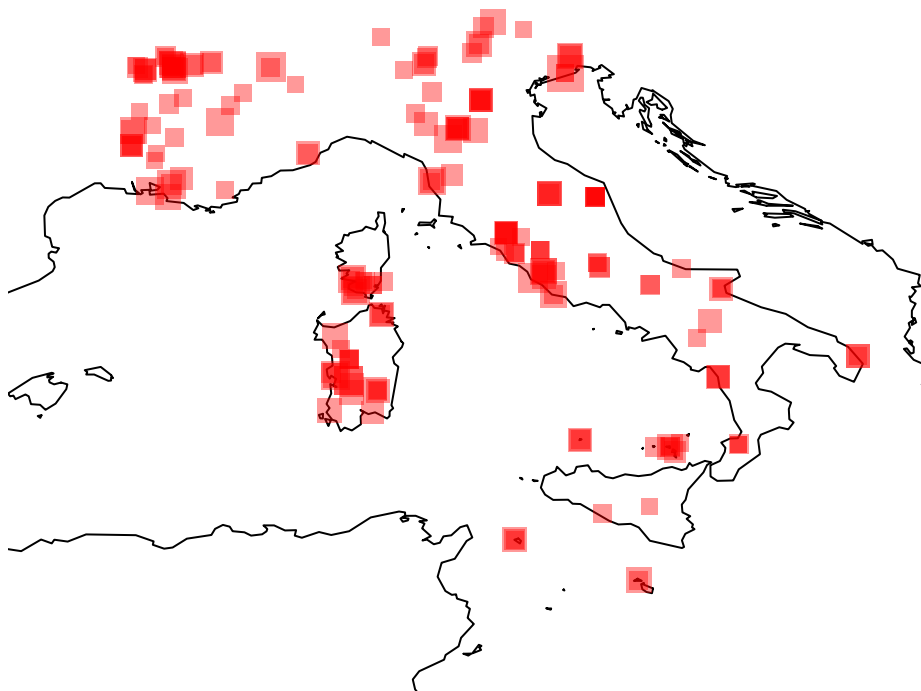

1185 cal. BC

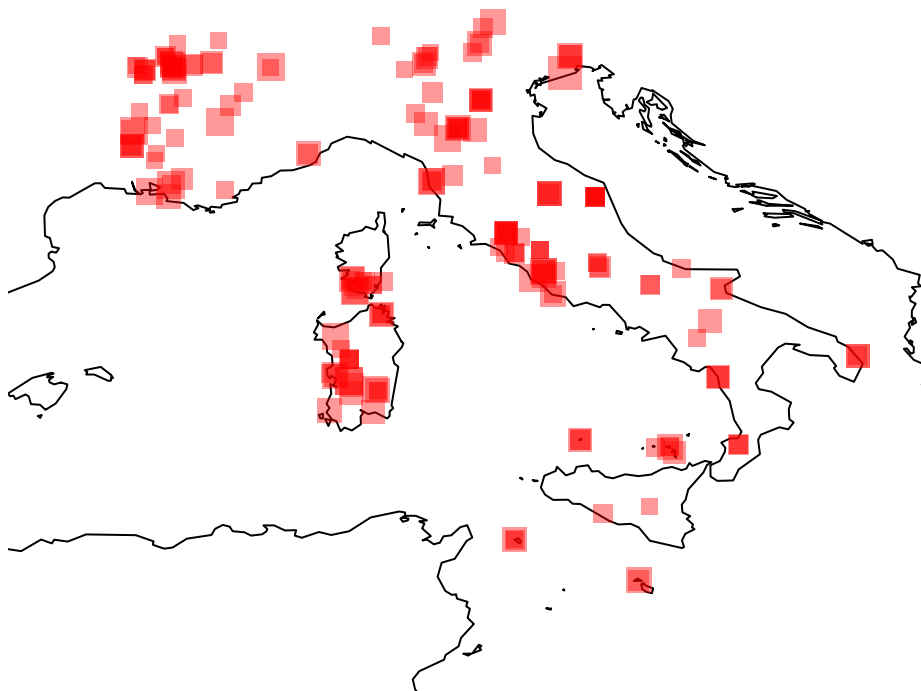

1180 cal. BC

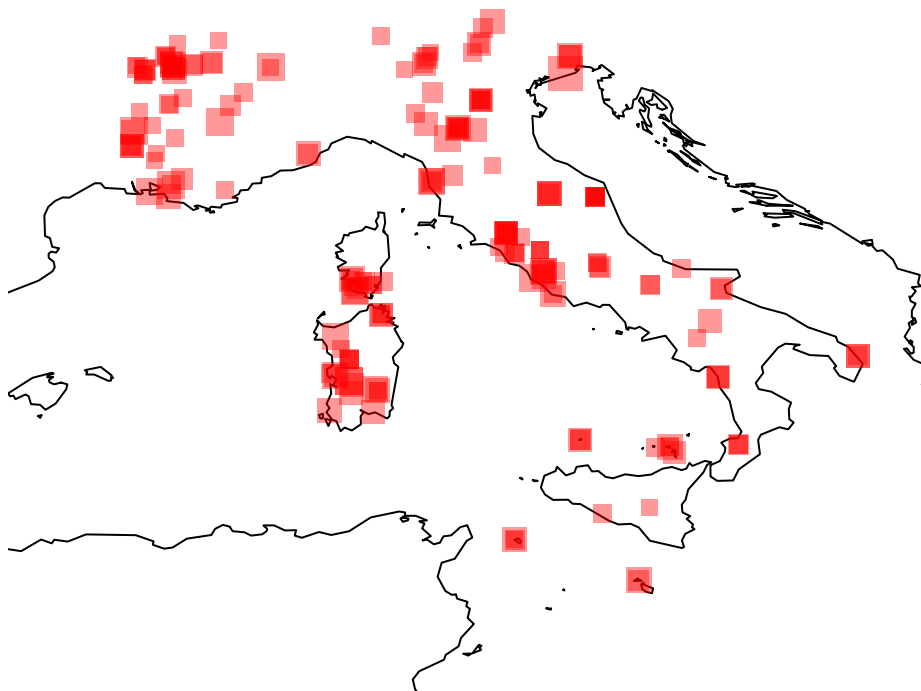

1175 cal. BC

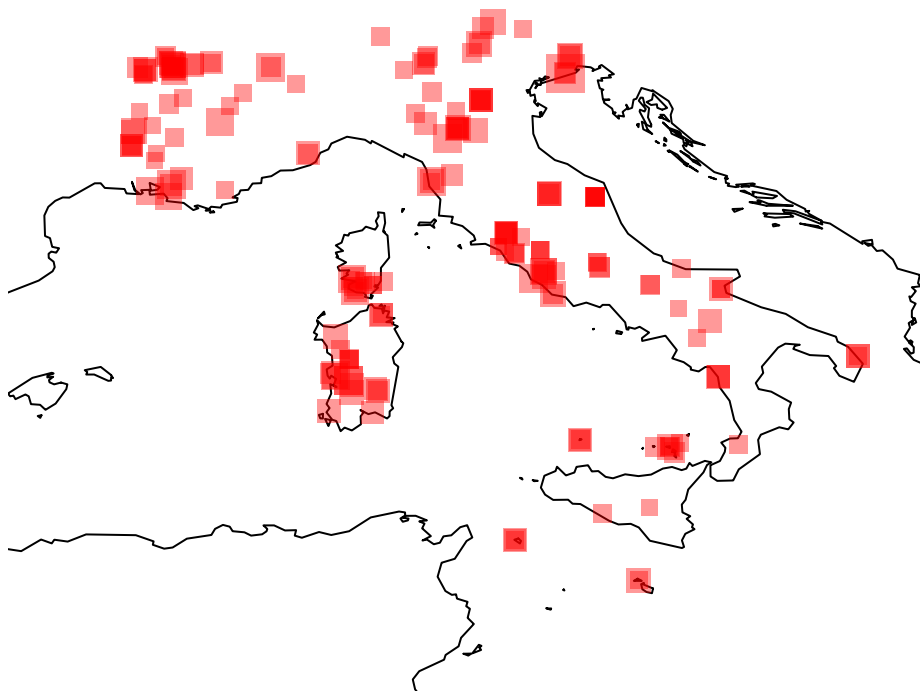

1170 cal. BC

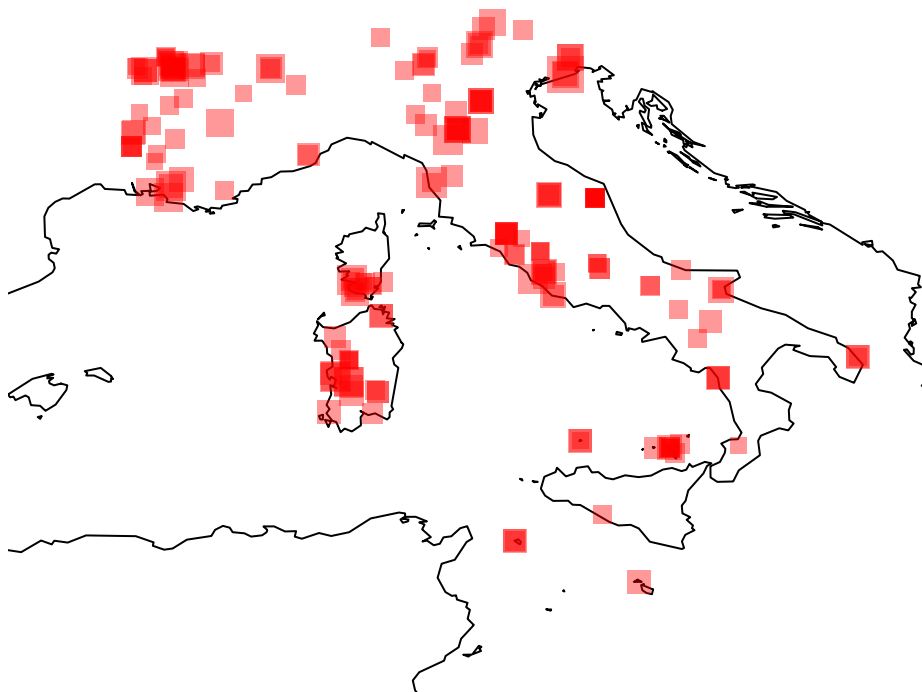



1165 cal. BC

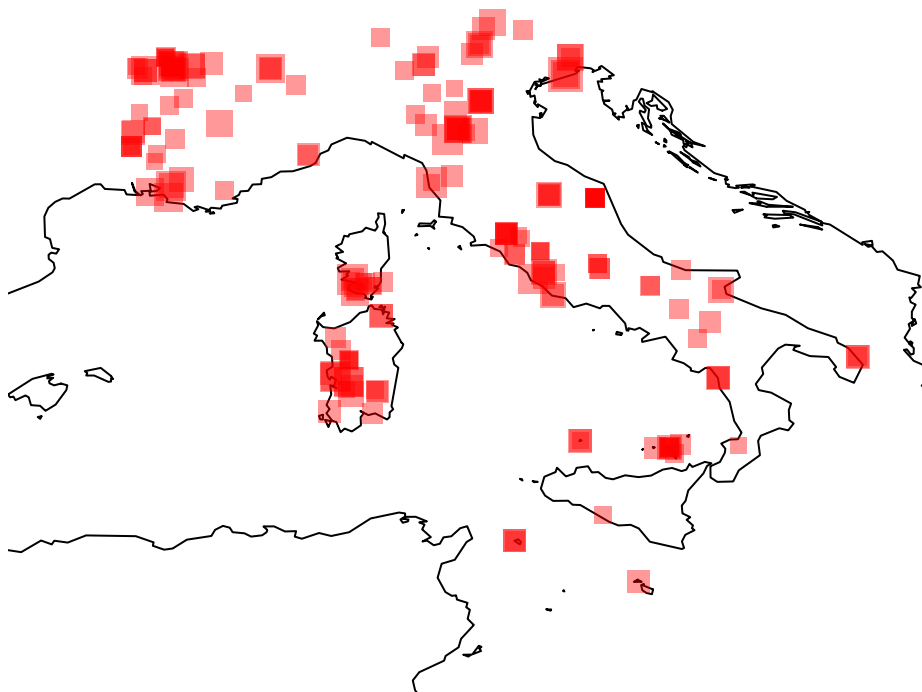

1160 cal. BC

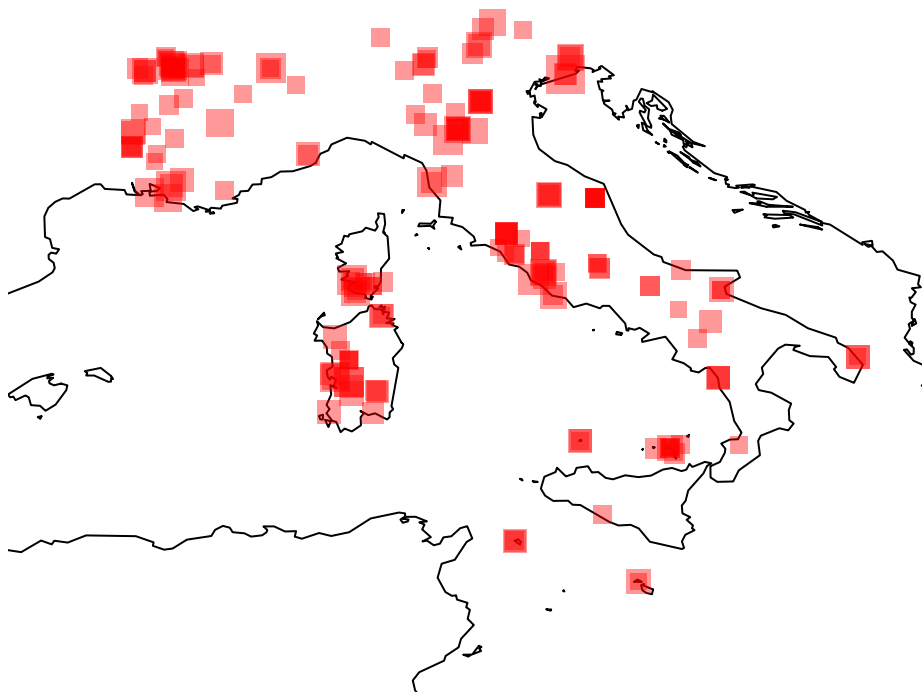

1155 cal. BC

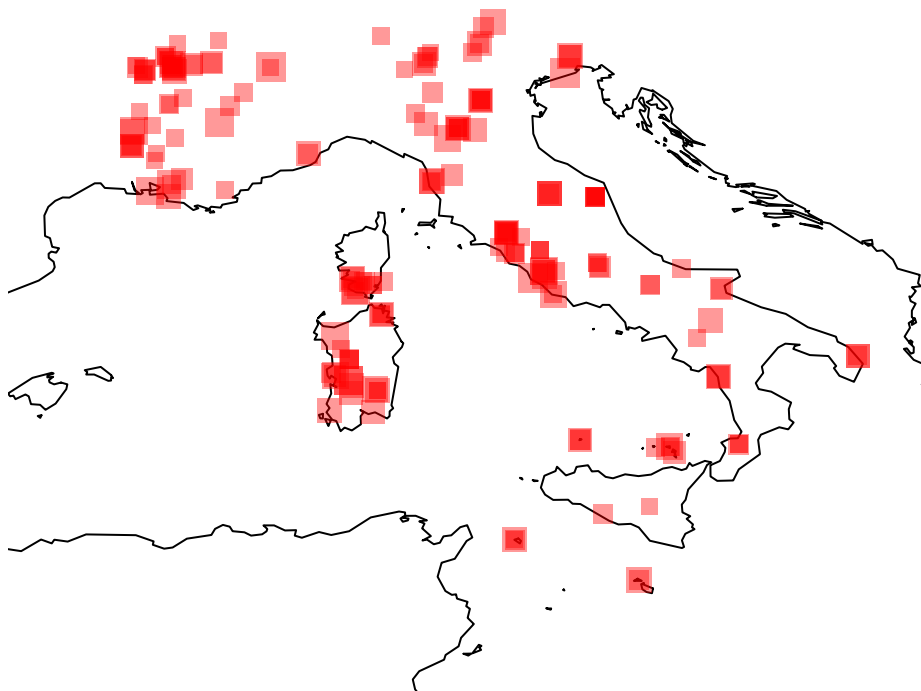

1150 cal. BC

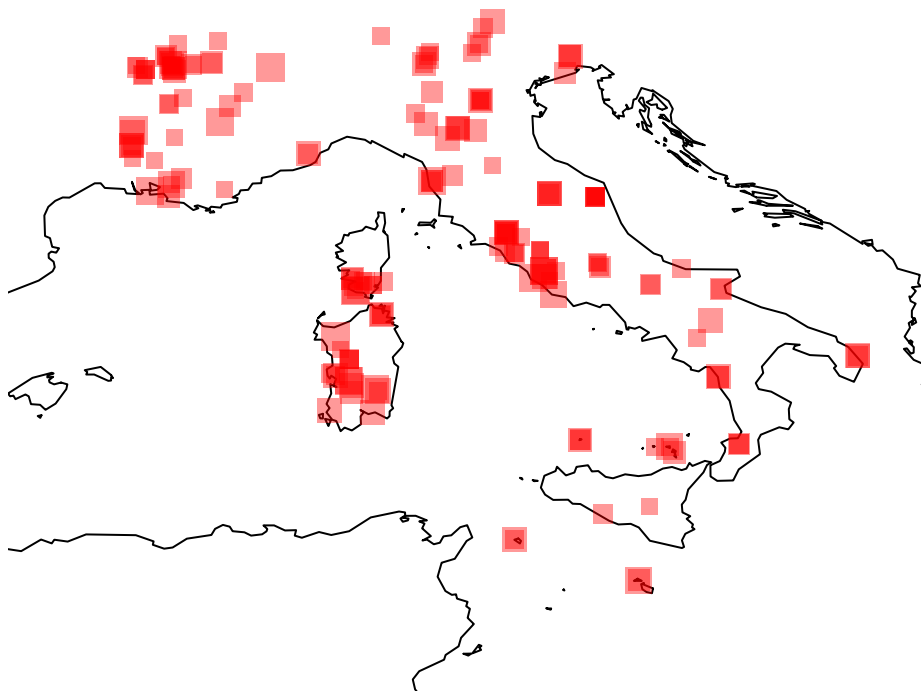

1145 cal. BC

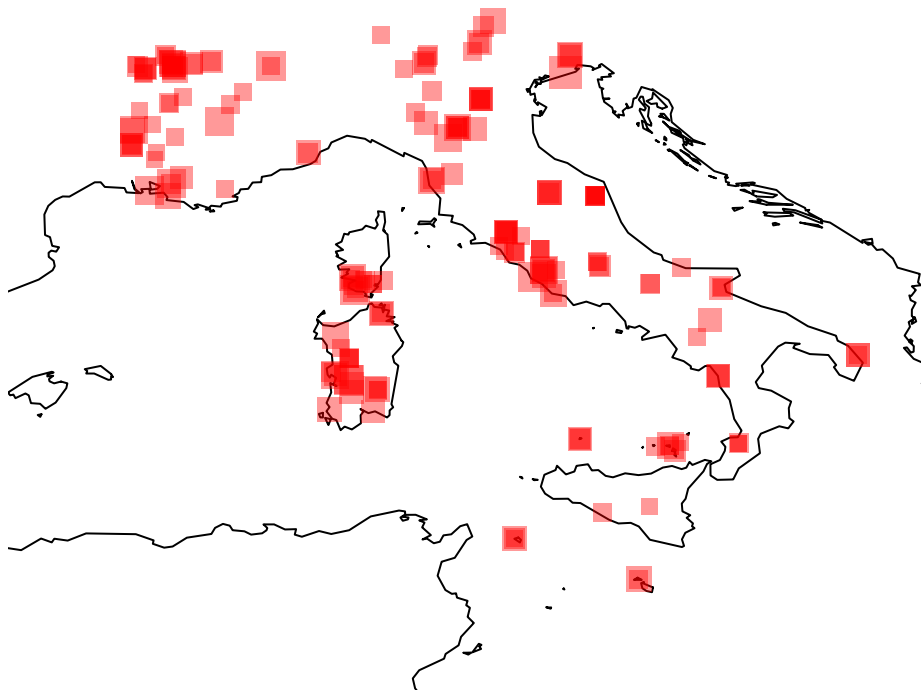

1140 cal. BC

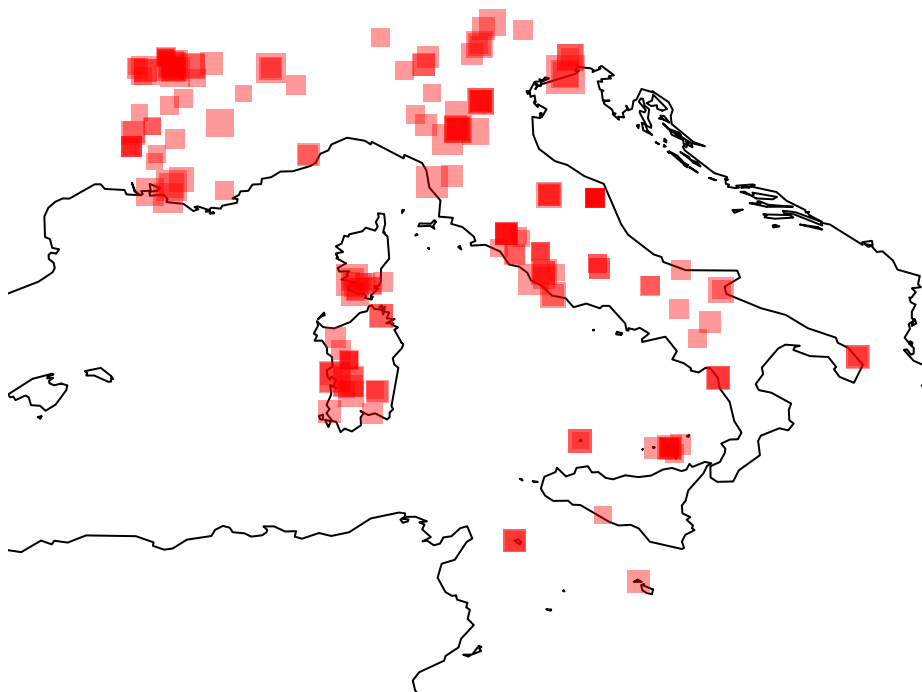

1135 cal. BC

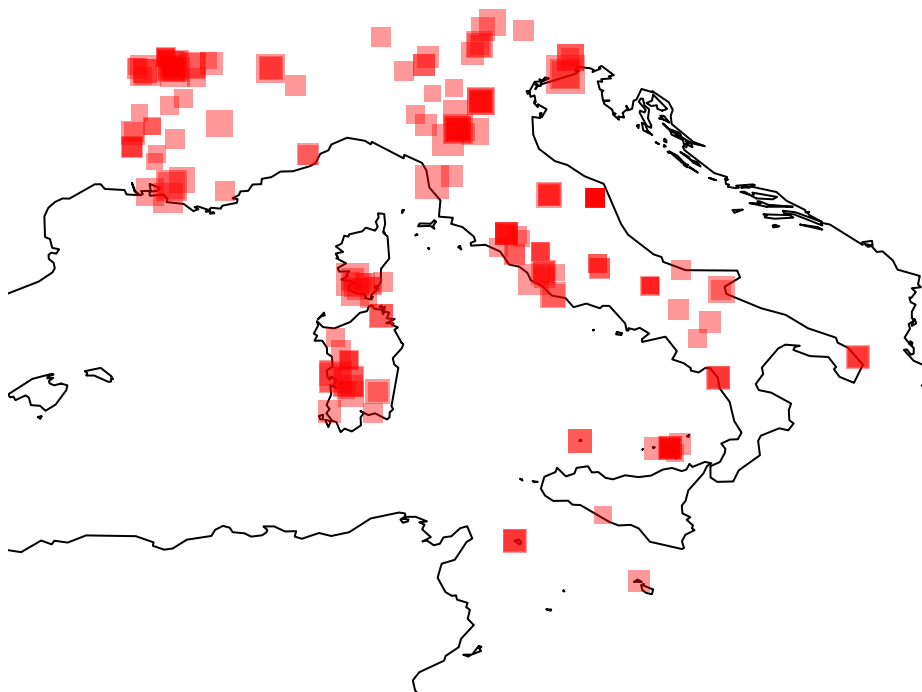

1130 cal. BC

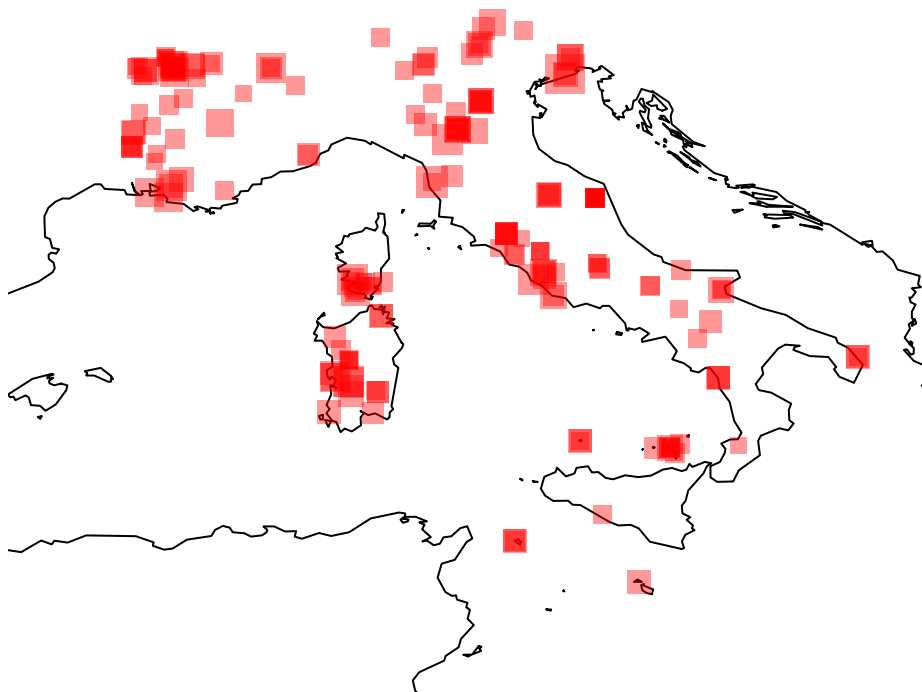



1125 cal. BC

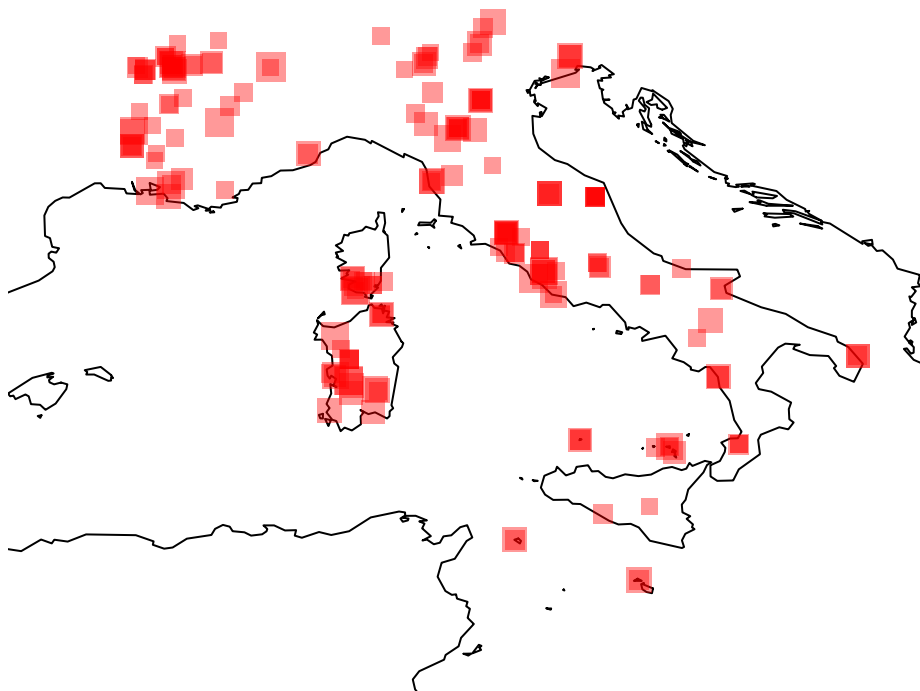

1120 cal. BC

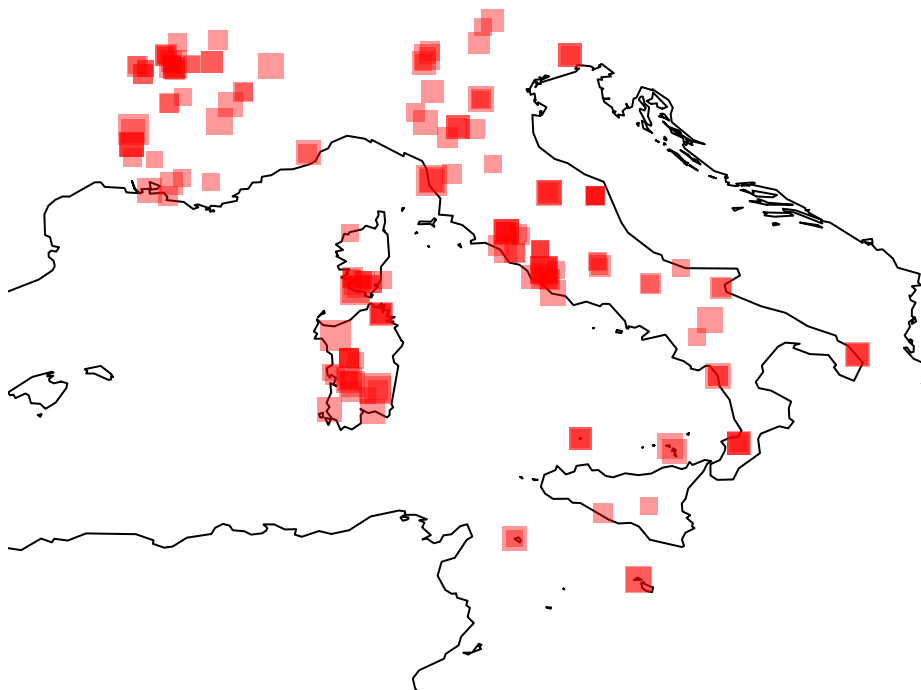

1115 cal. BC

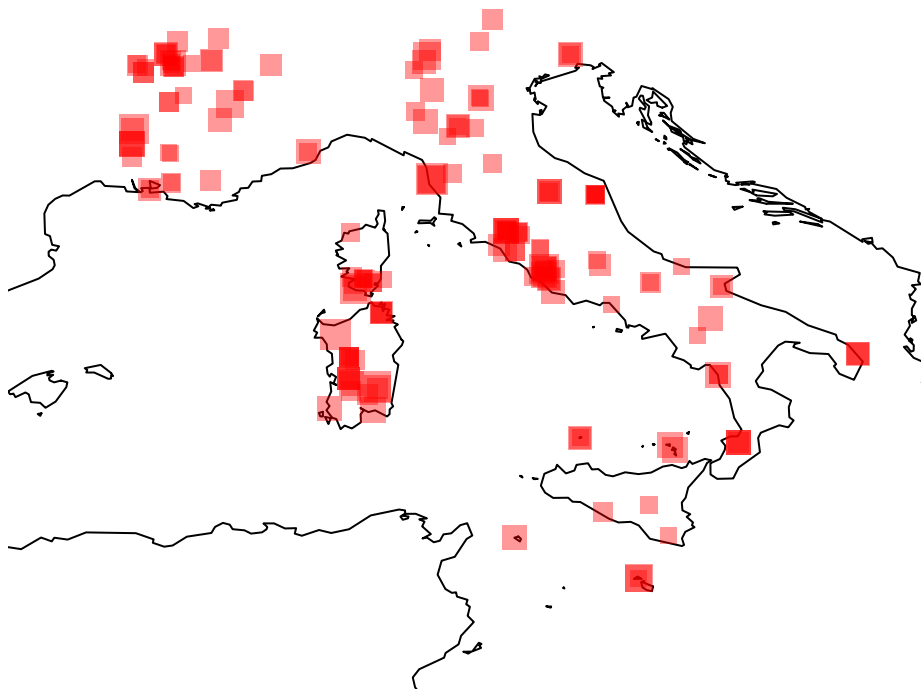

1110 cal. BC

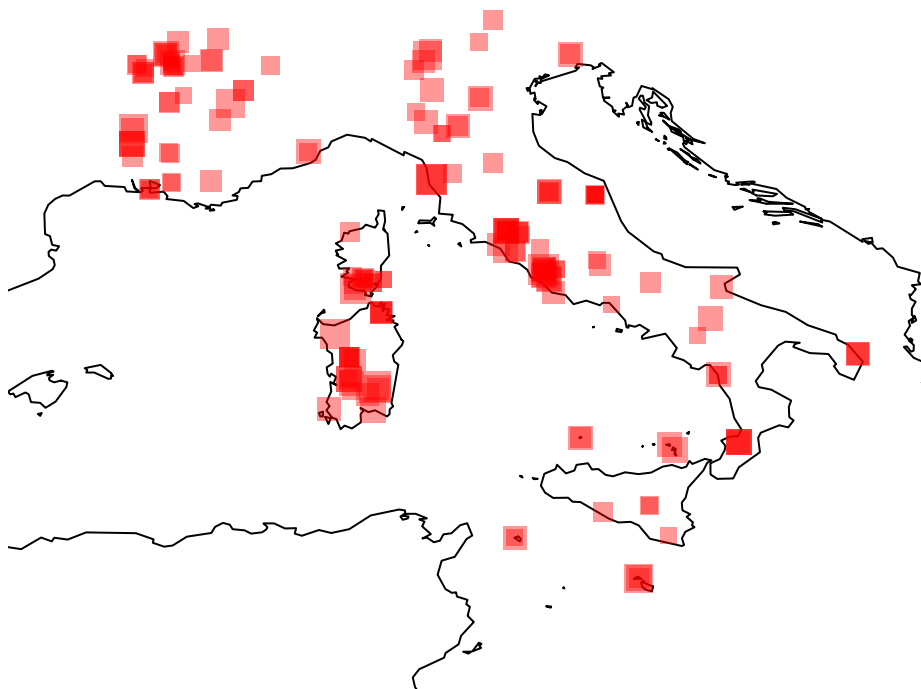

1105 cal. BC

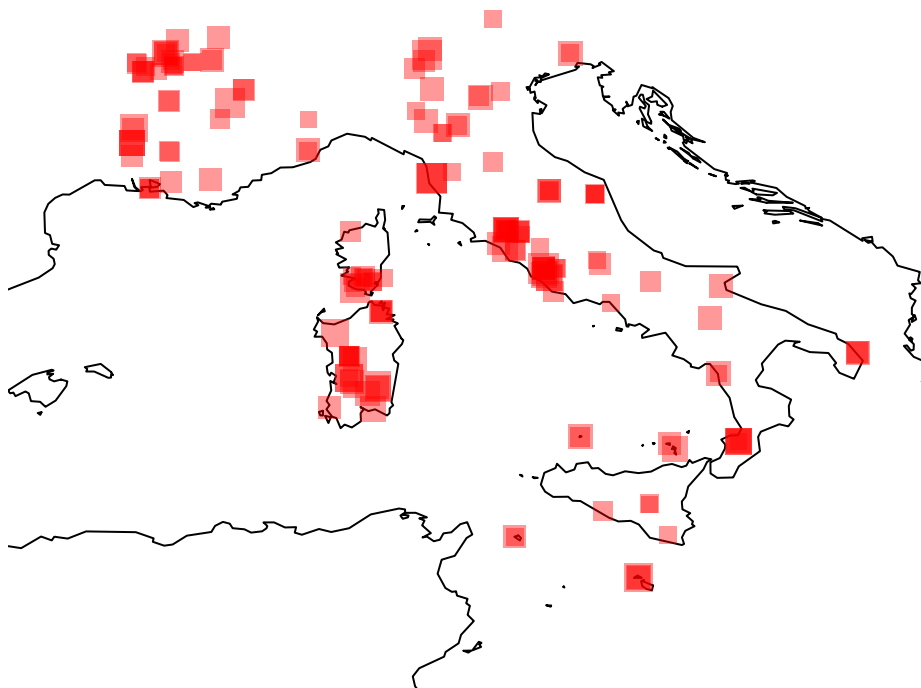

1100 cal. BC

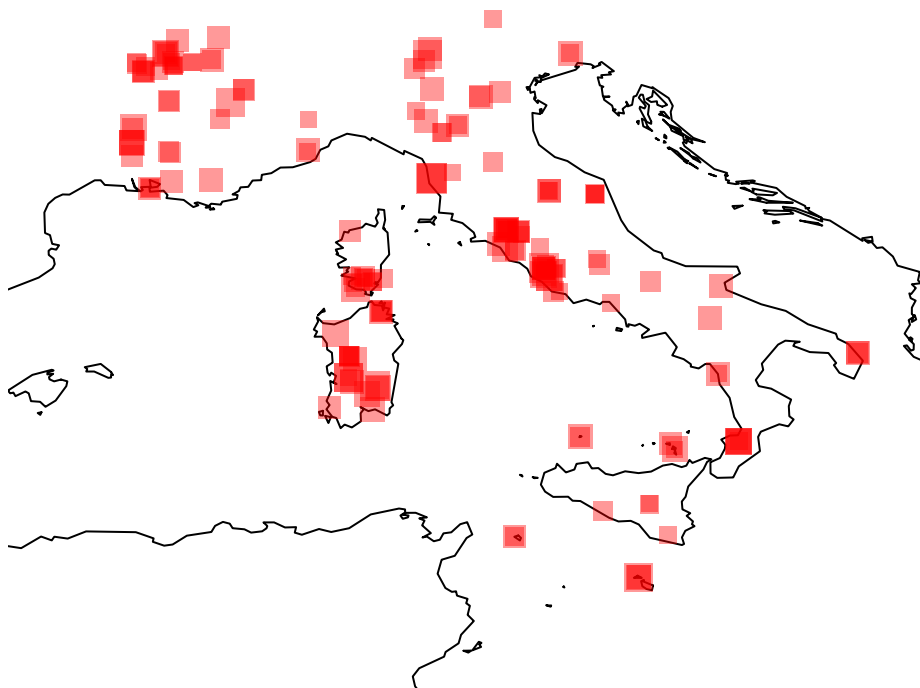

1095 cal. BC

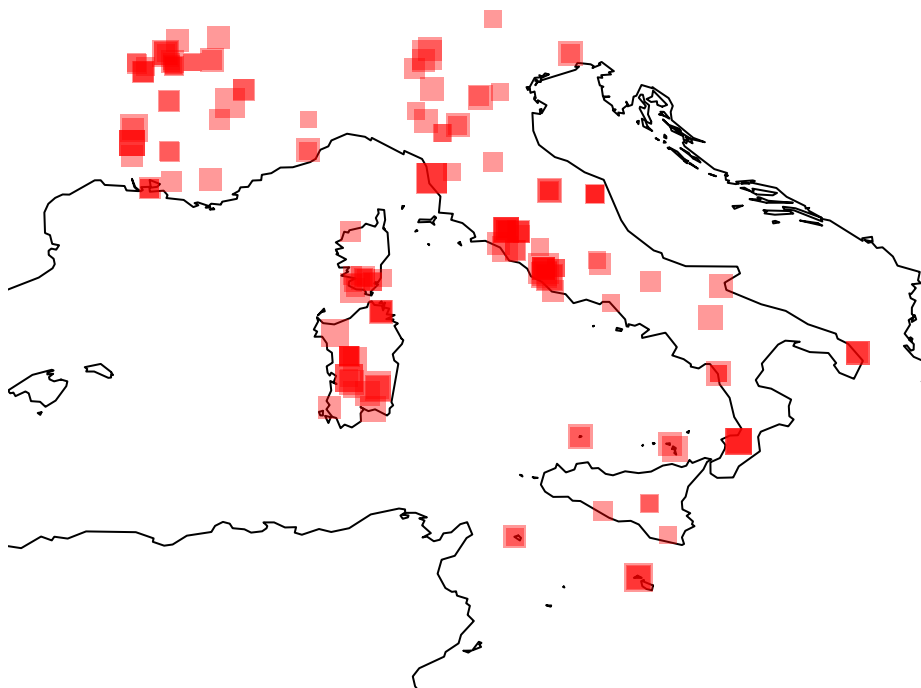

1090 cal. BC

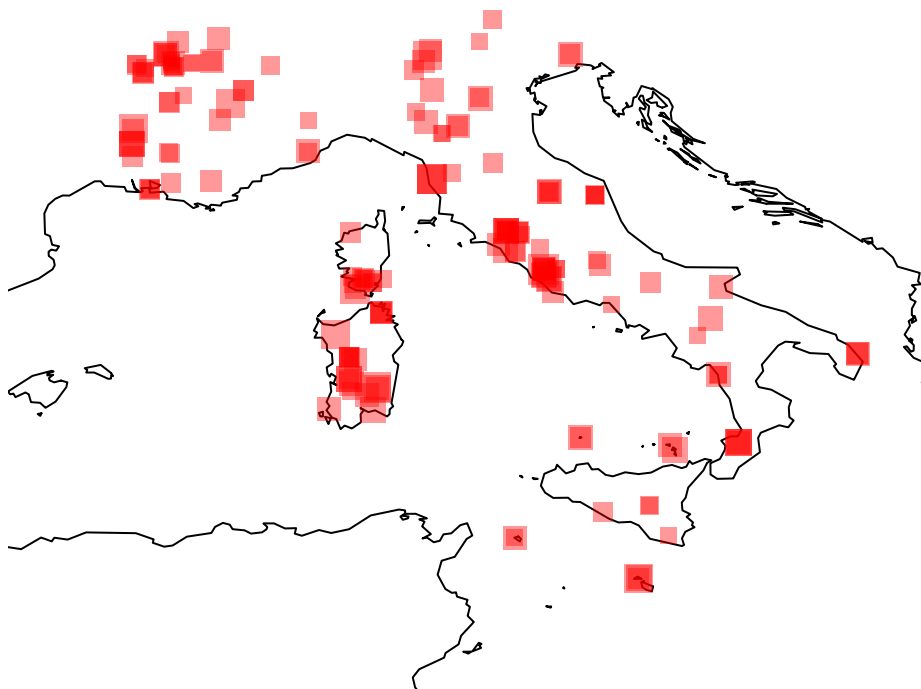



1085 cal. BC

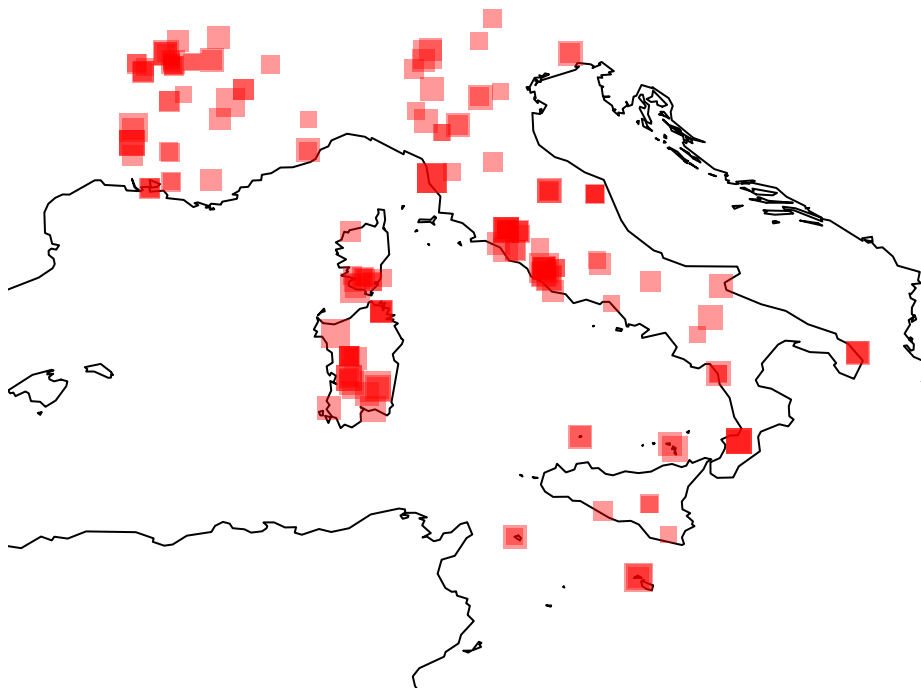

1080 cal. BC

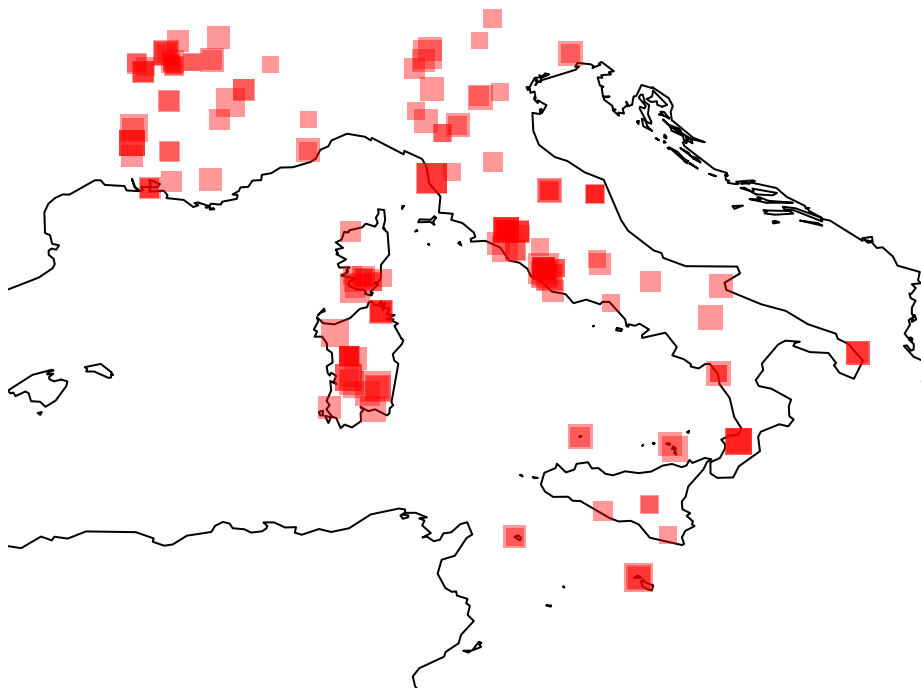

1075 cal. BC

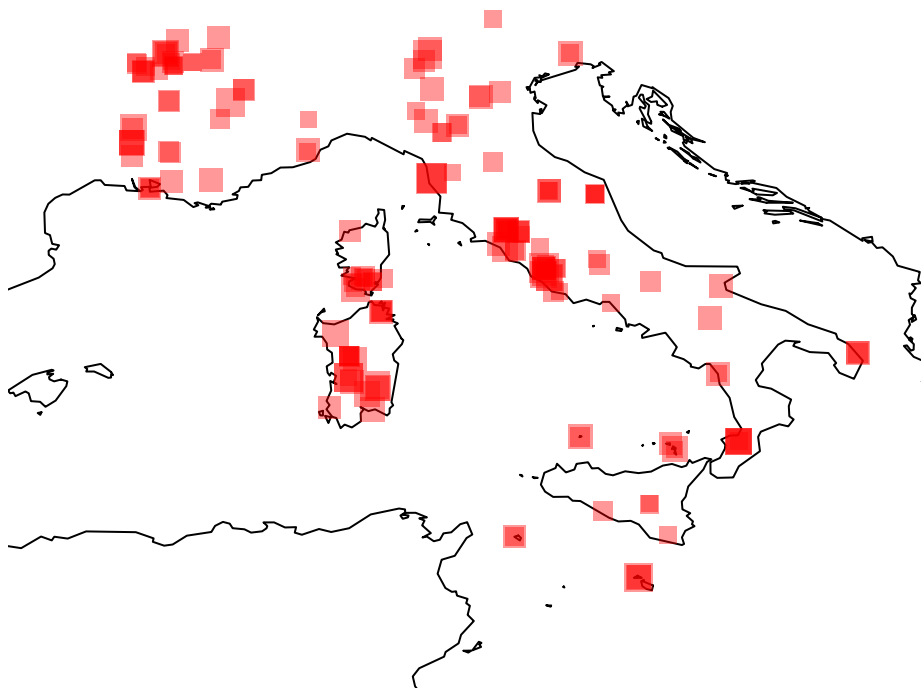

1070 cal. BC

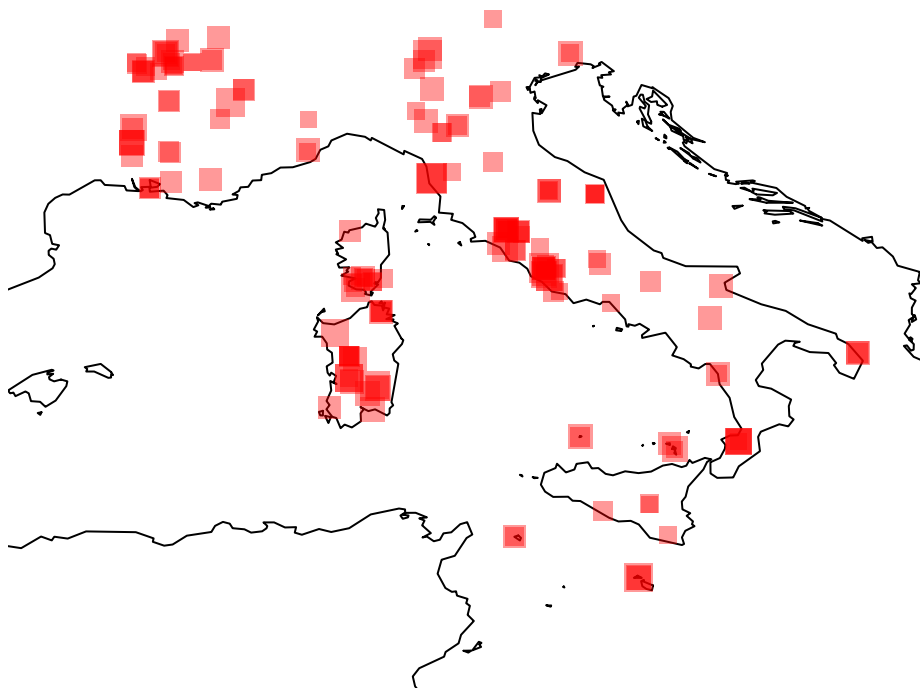

1065 cal. BC

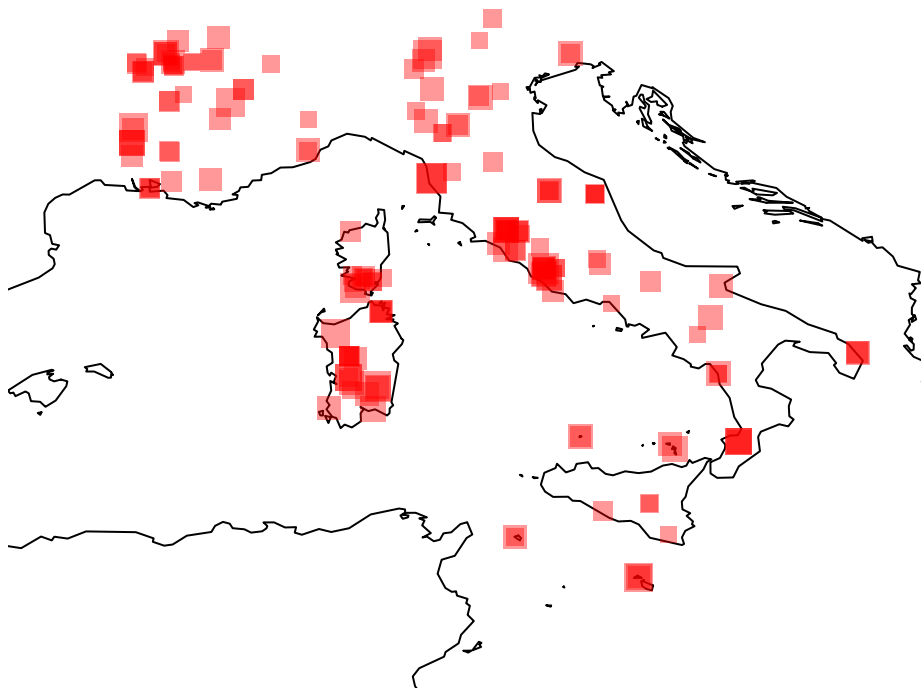

1060 cal. BC

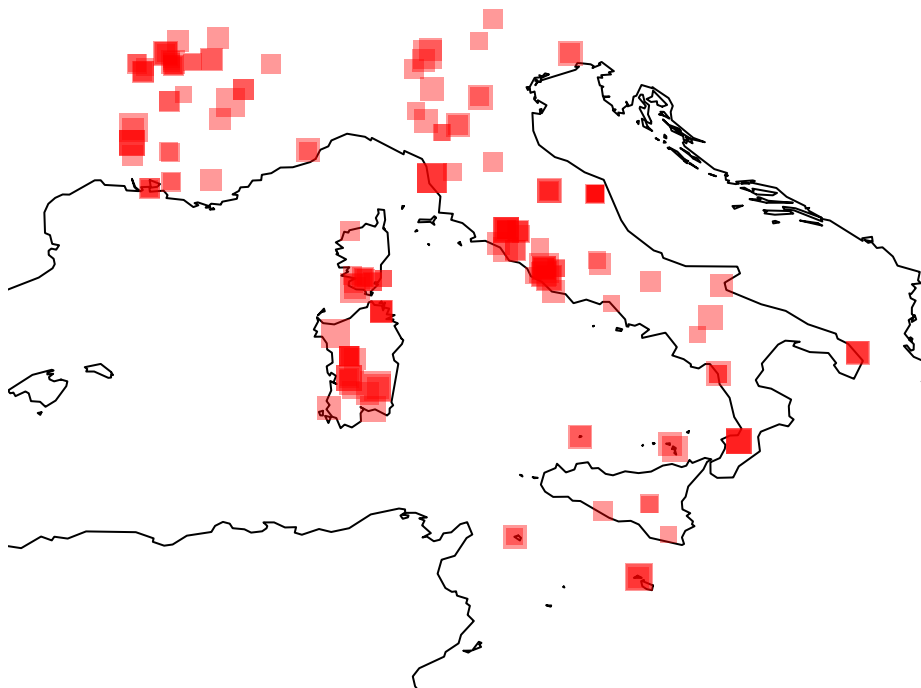

1055 cal. BC

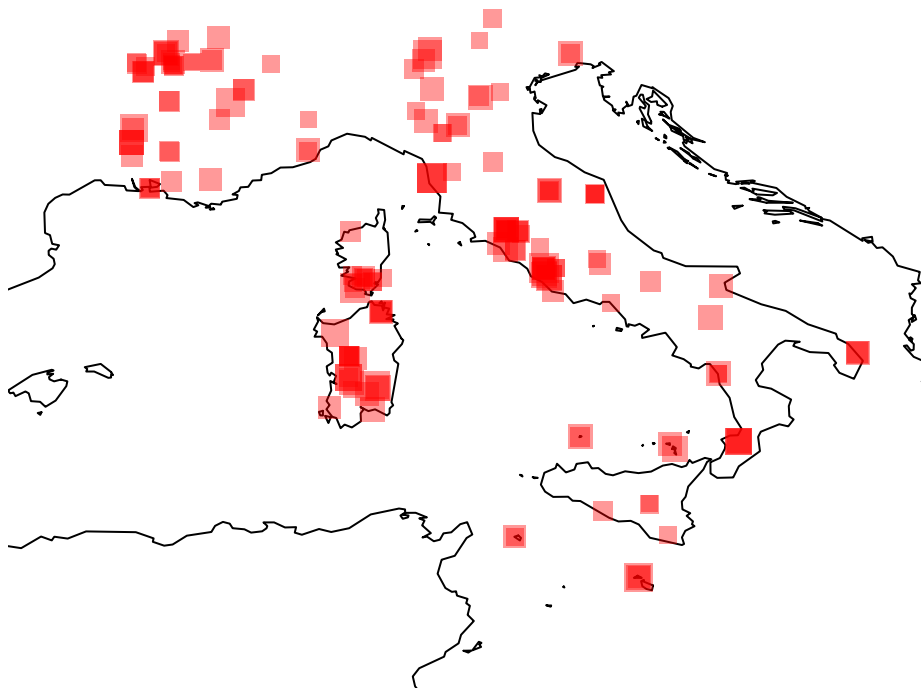

1050 cal. BC

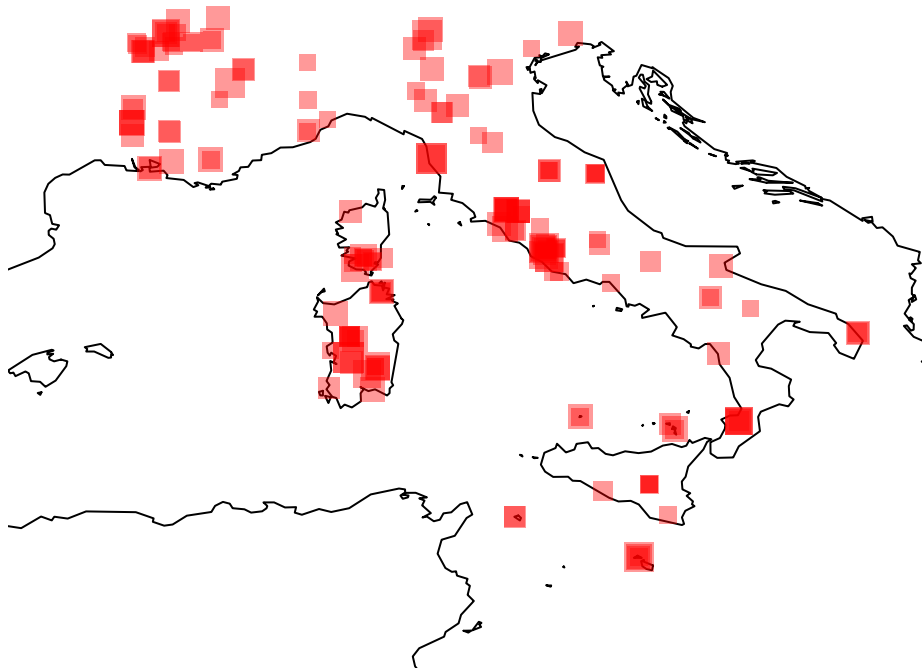



1045 cal. BC

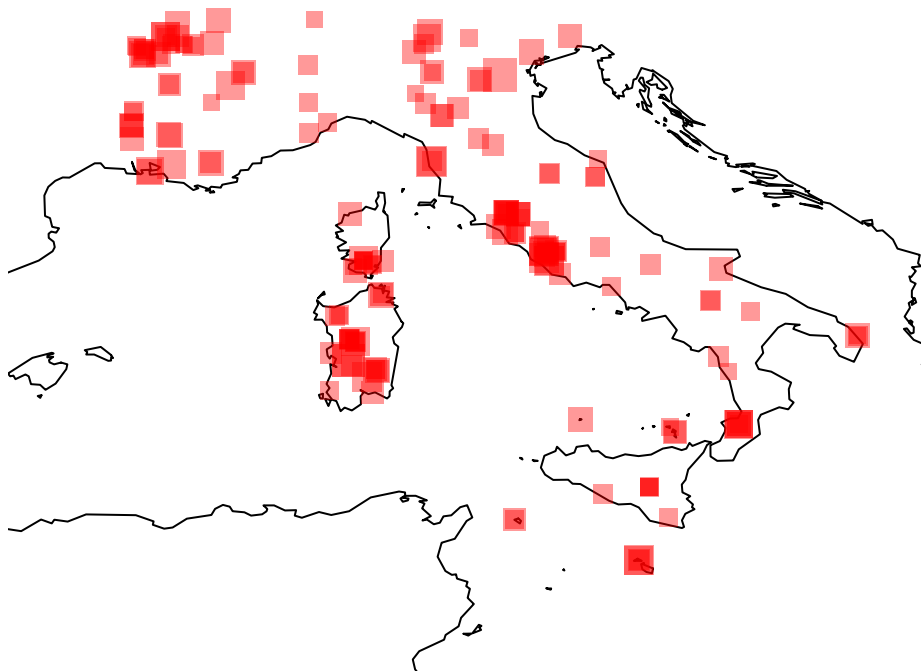

1040 cal. BC

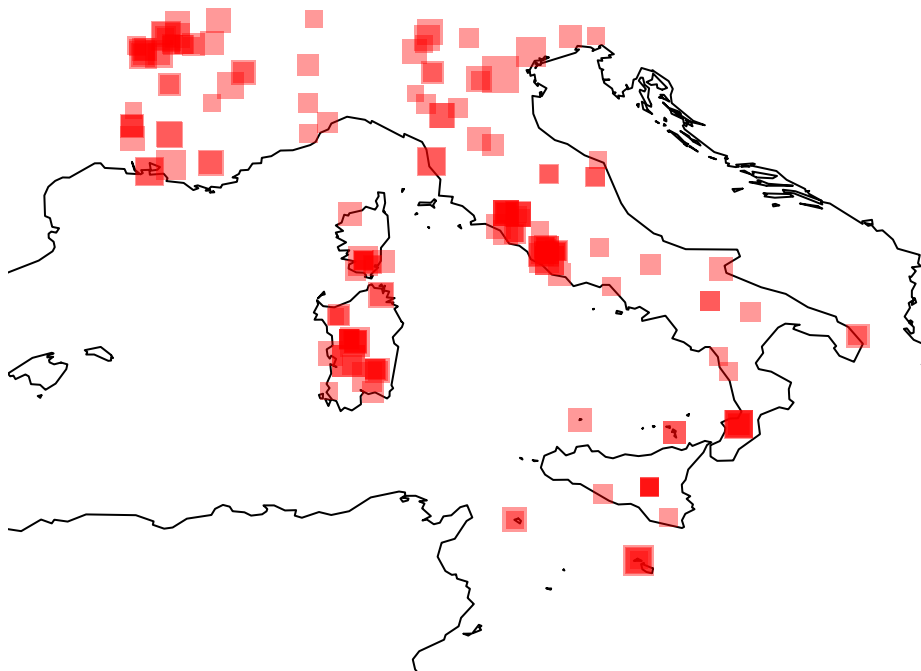

1035 cal. BC

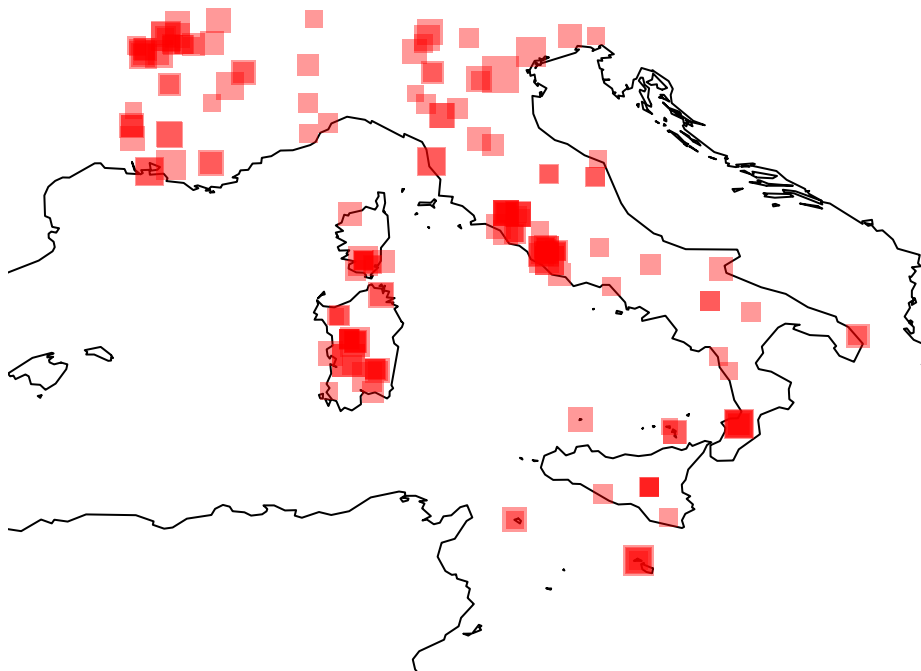

1030 cal. BC

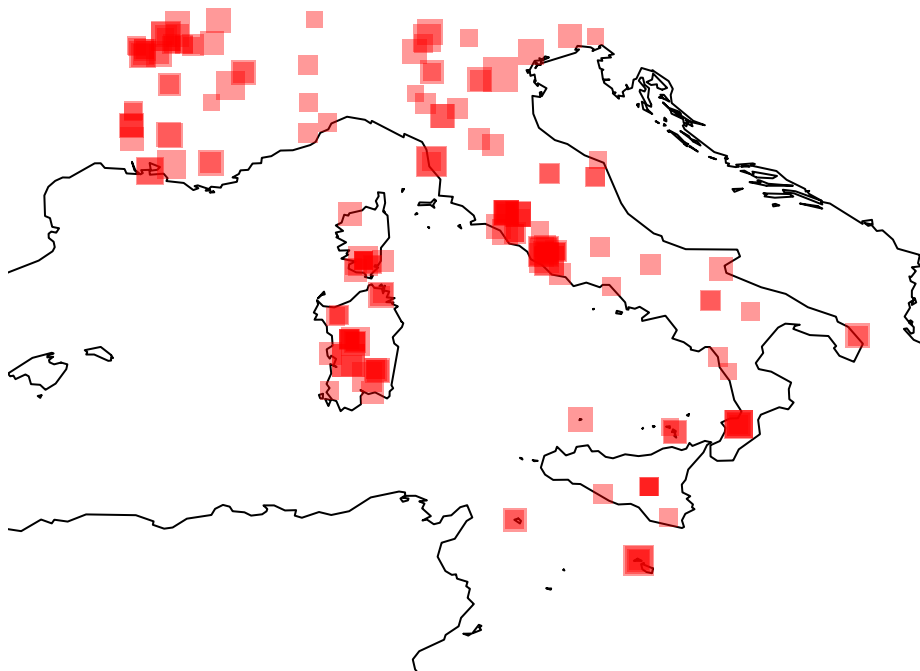

1025 cal. BC

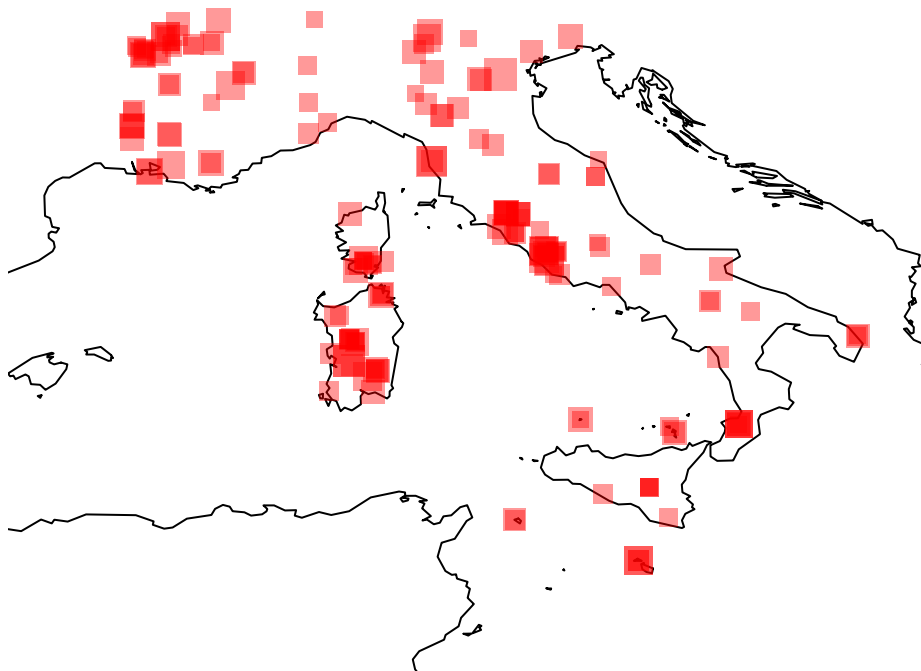

1020 cal. BC

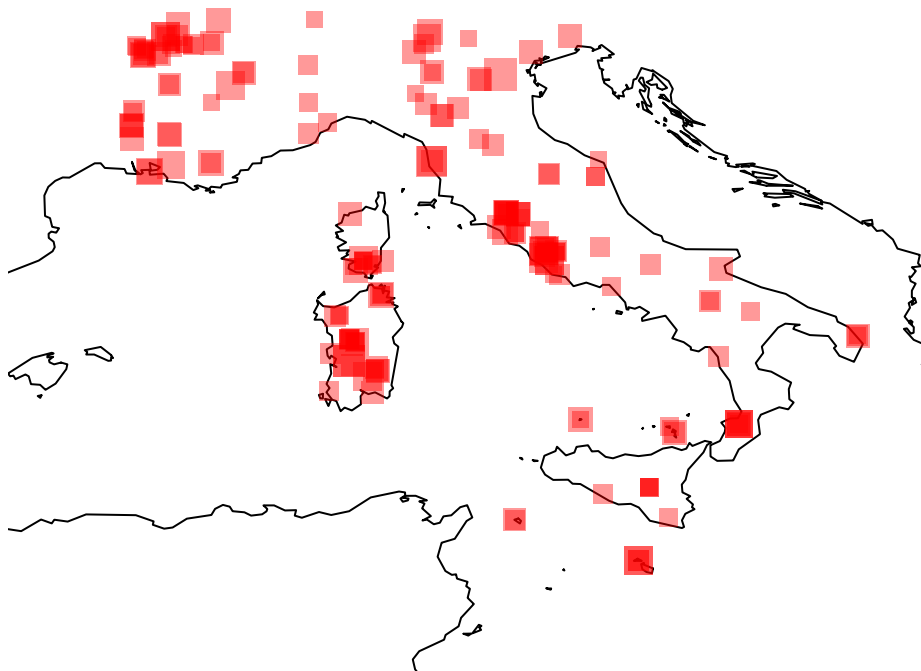

1015 cal. BC

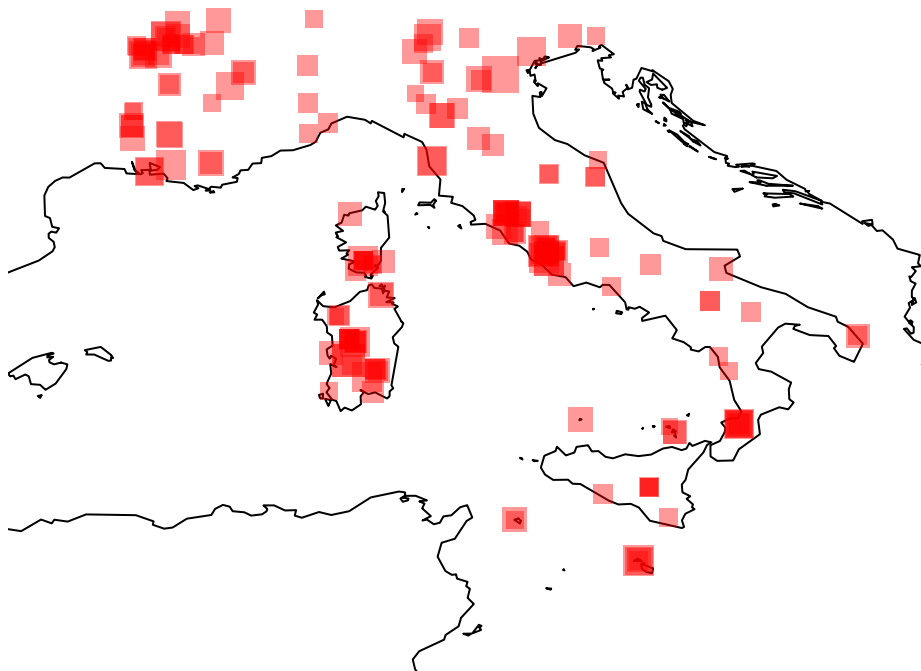

1010 cal. BC

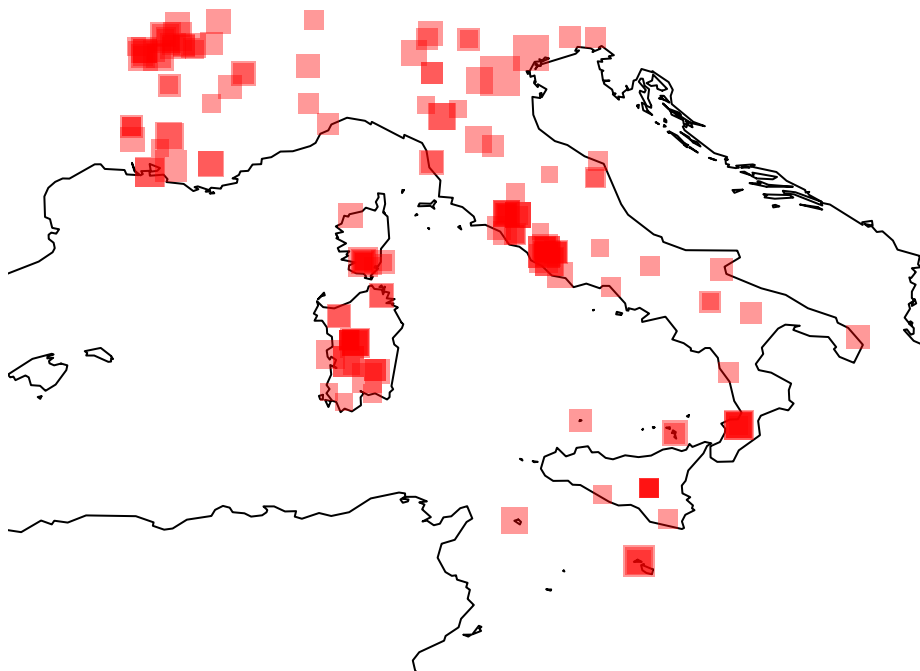



1005 cal. BC

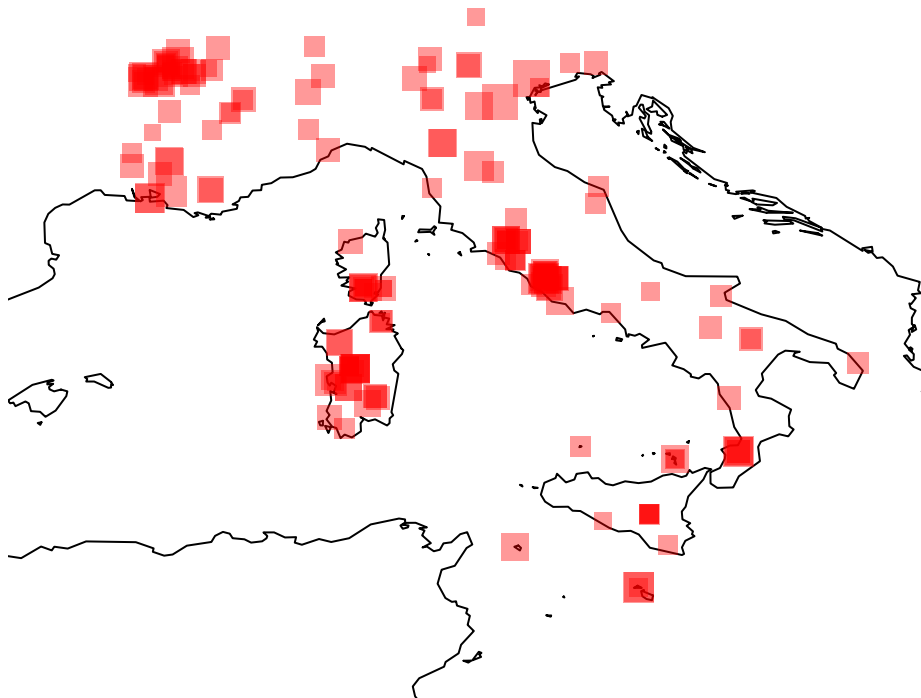

1000 cal. BC

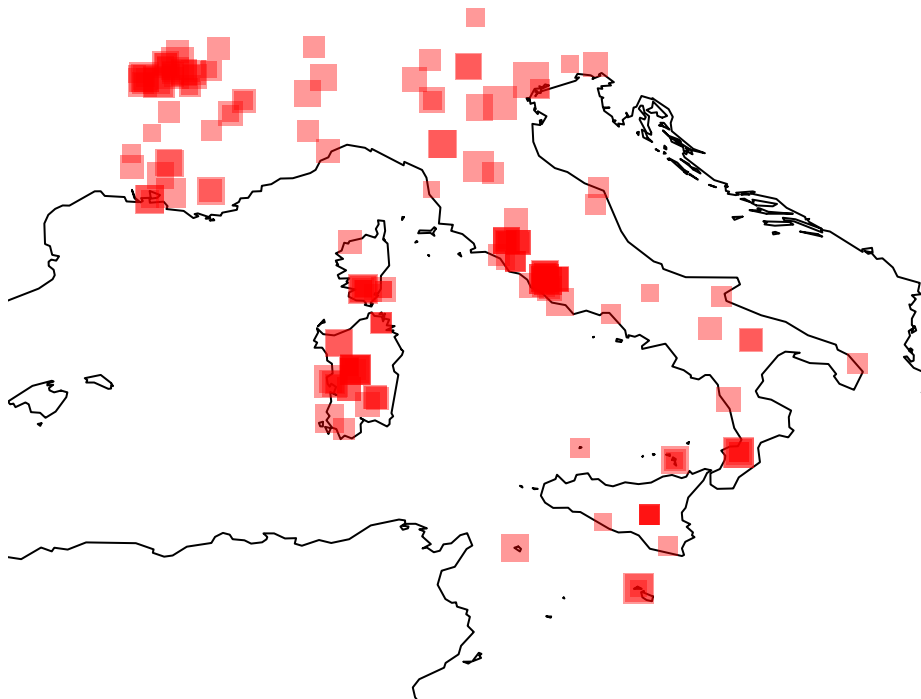

995 cal. BC

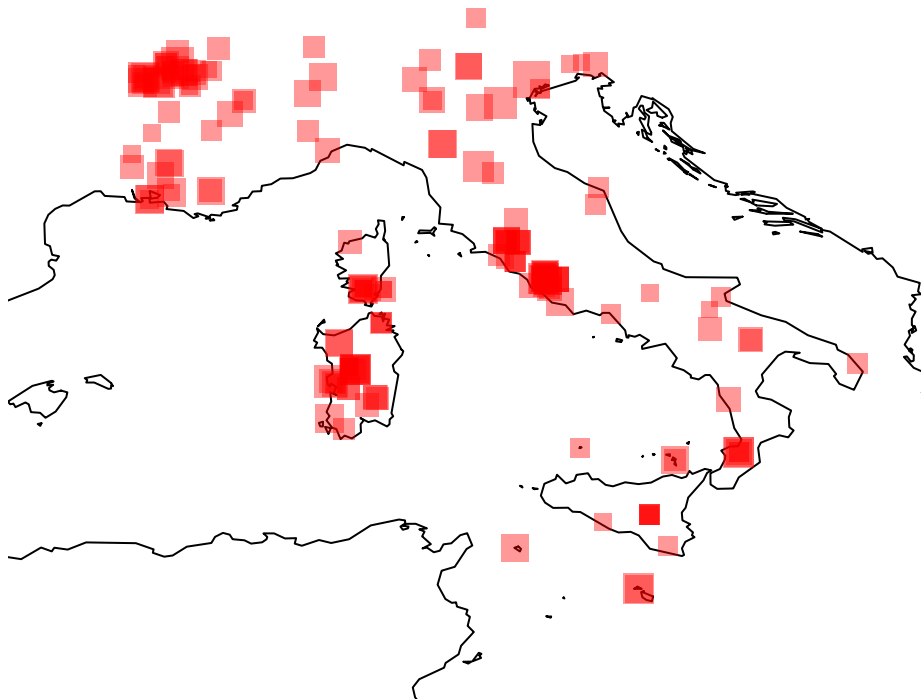

990 cal. BC

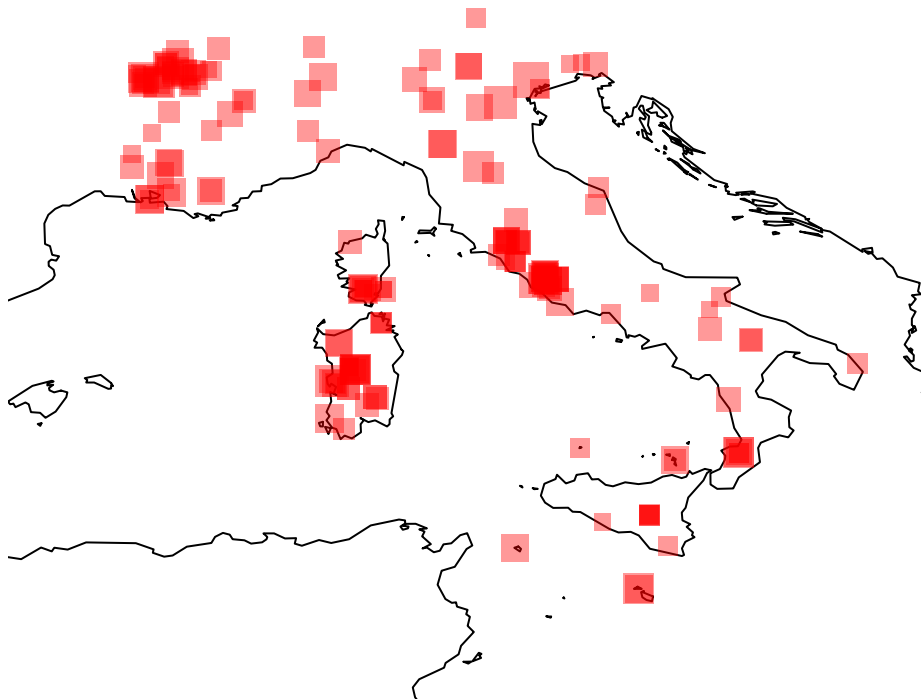

985 cal. BC

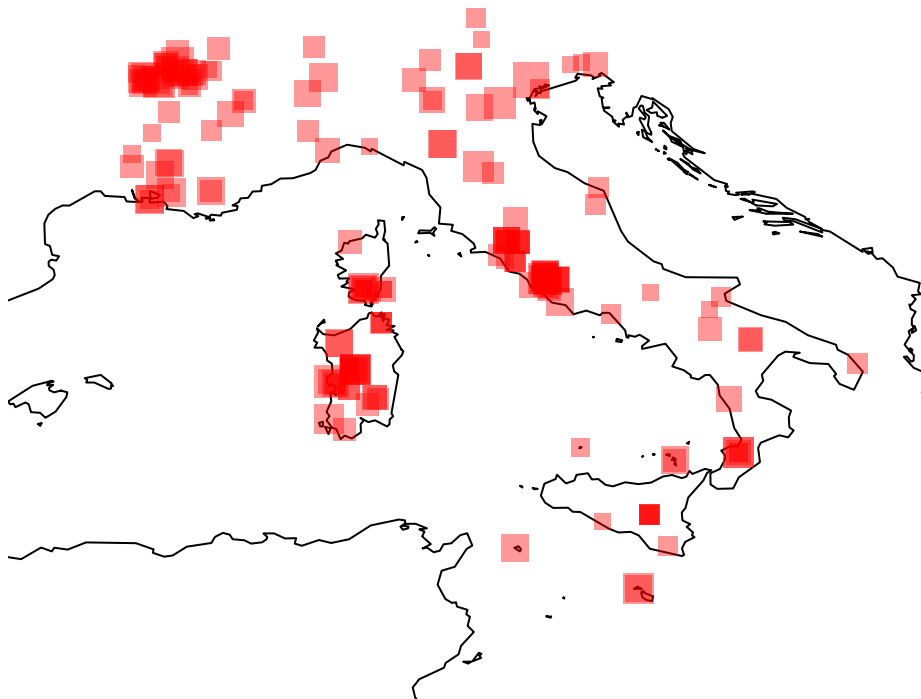

980 cal. BC

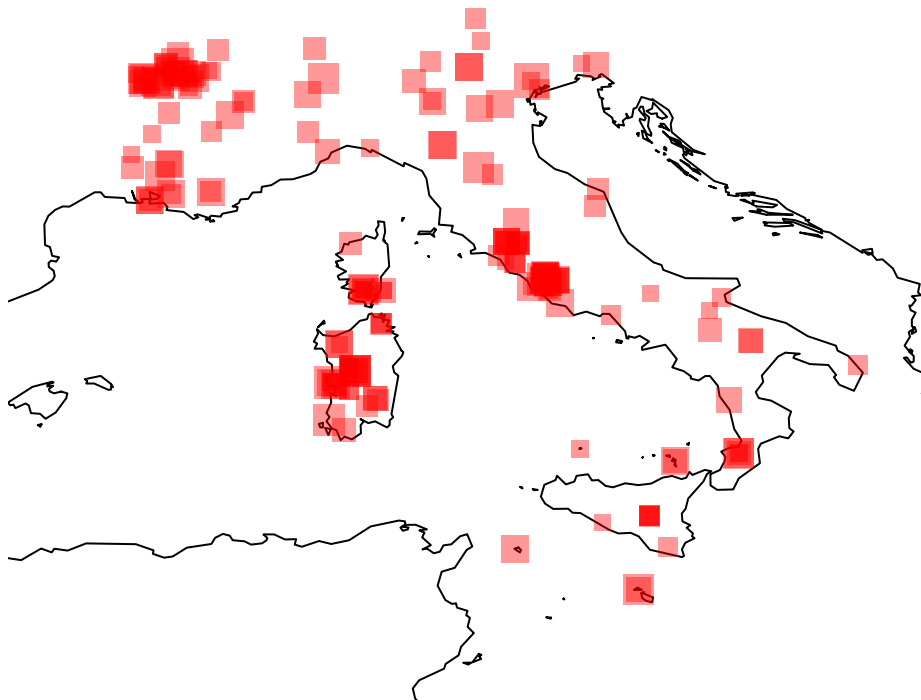

975 cal. BC

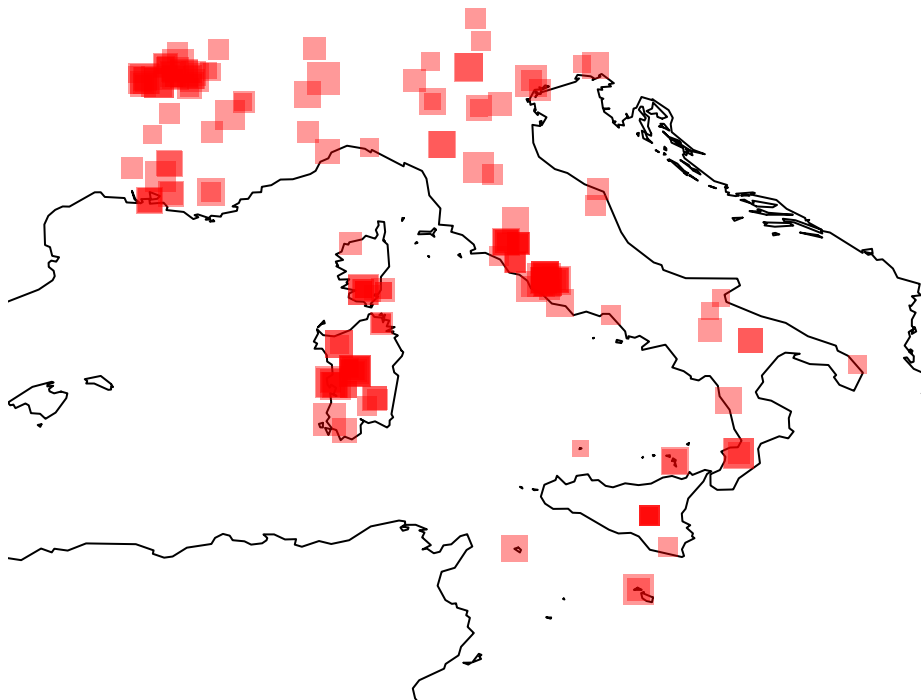

970 cal. BC

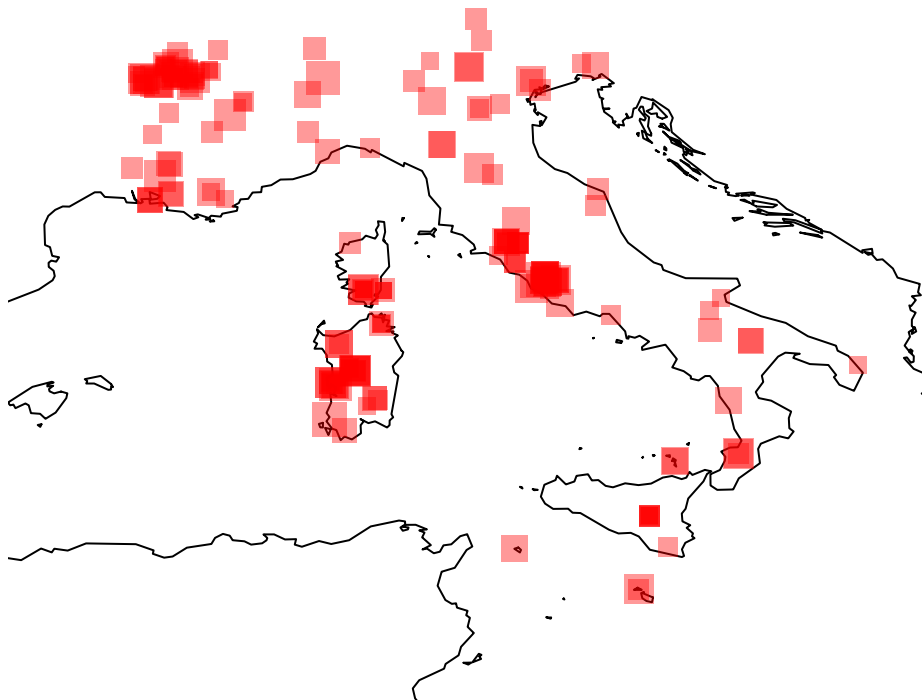



965 cal. BC

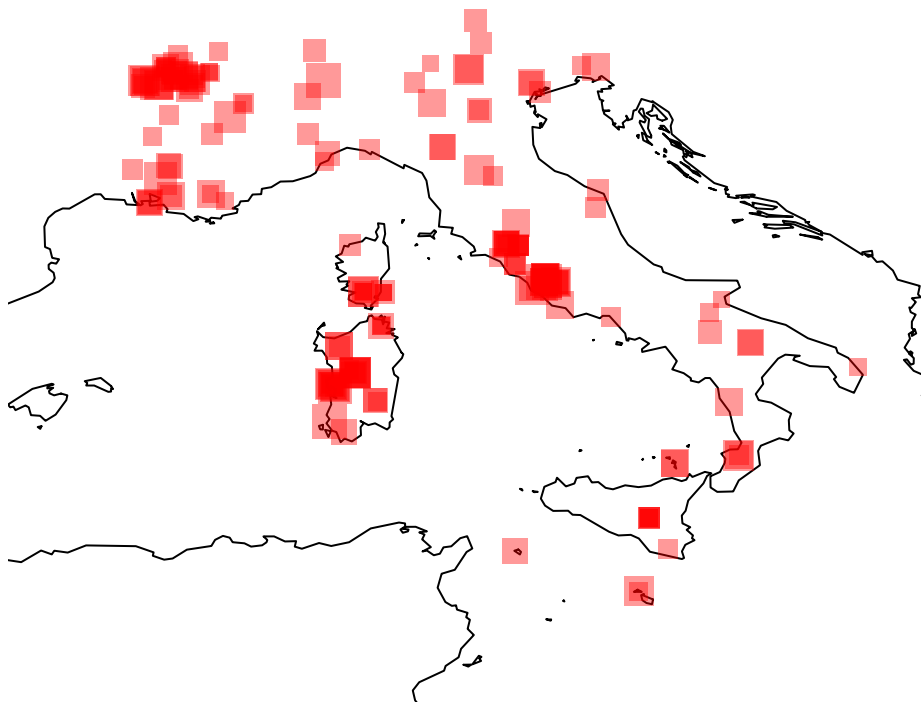

960 cal. BC

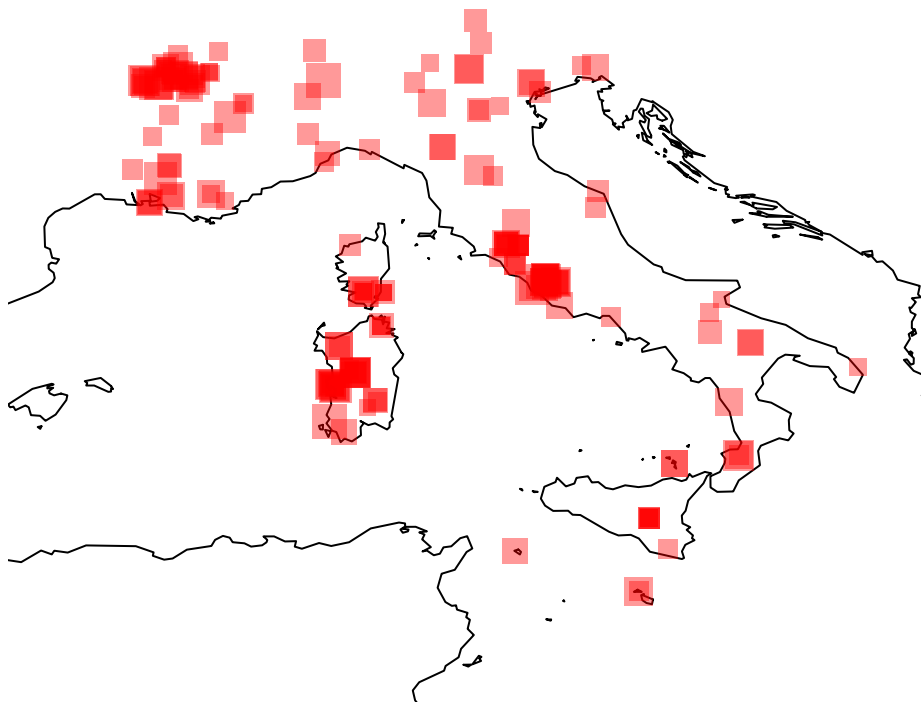

955 cal. BC

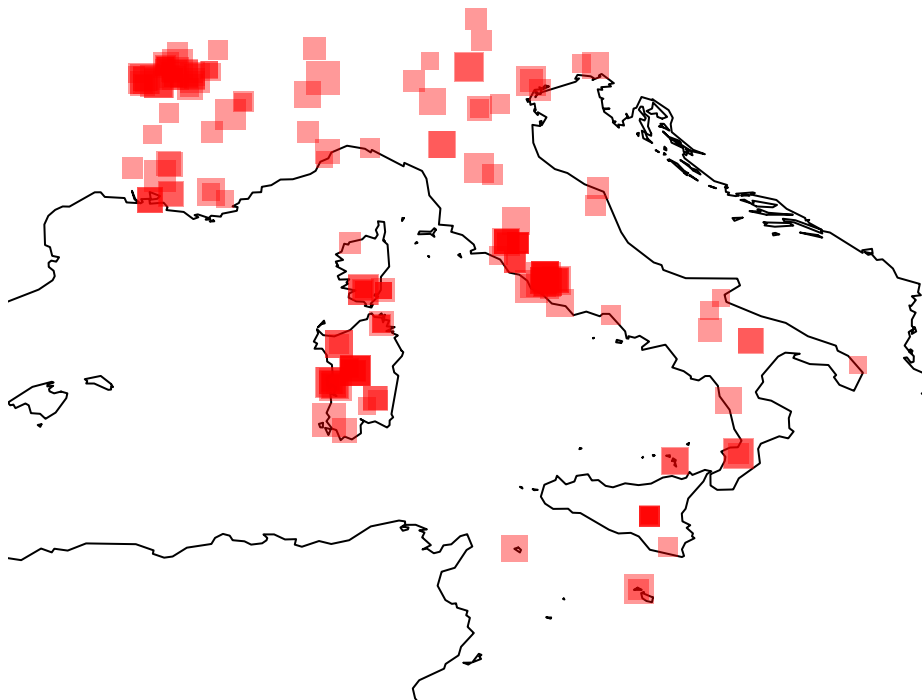

950 cal. BC

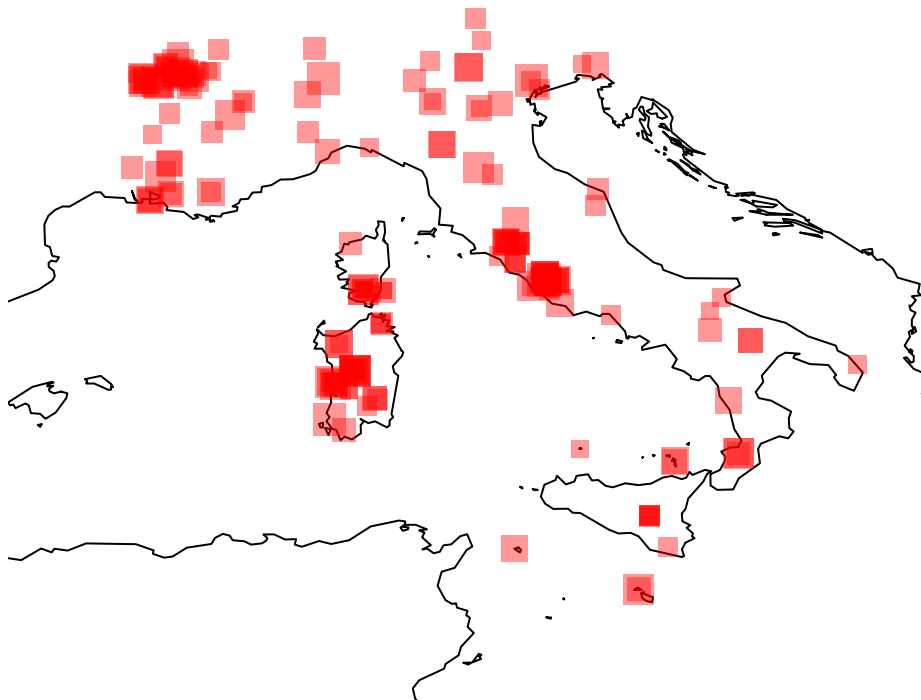

945 cal. BC

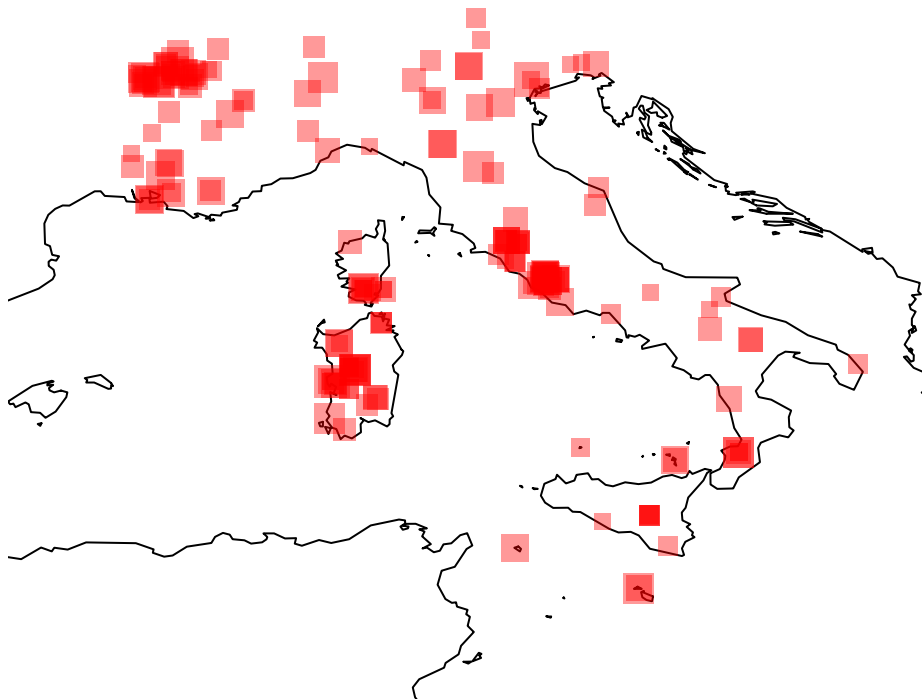

940 cal. BC

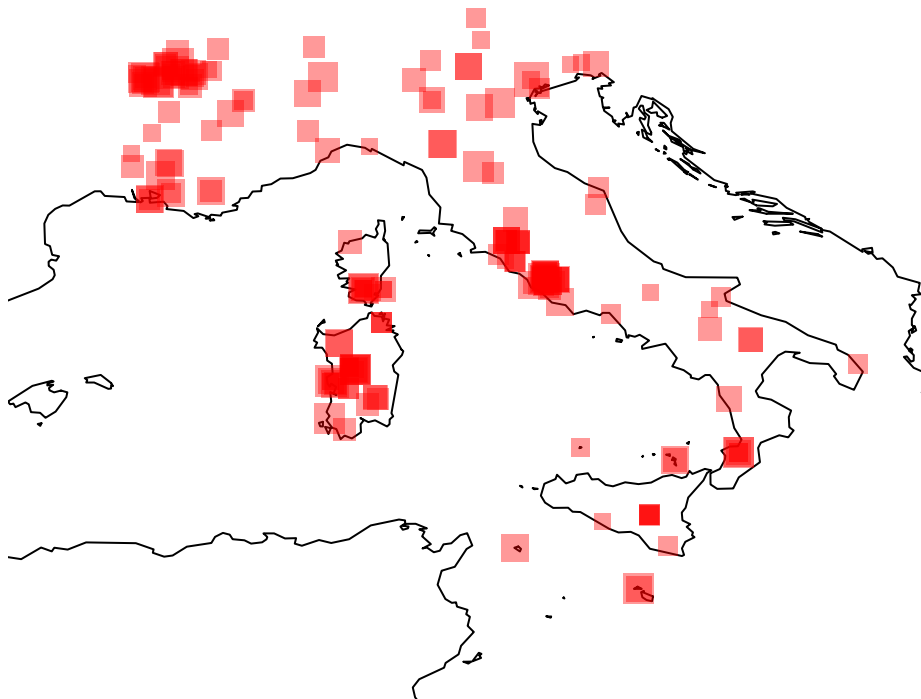

935 cal. BC

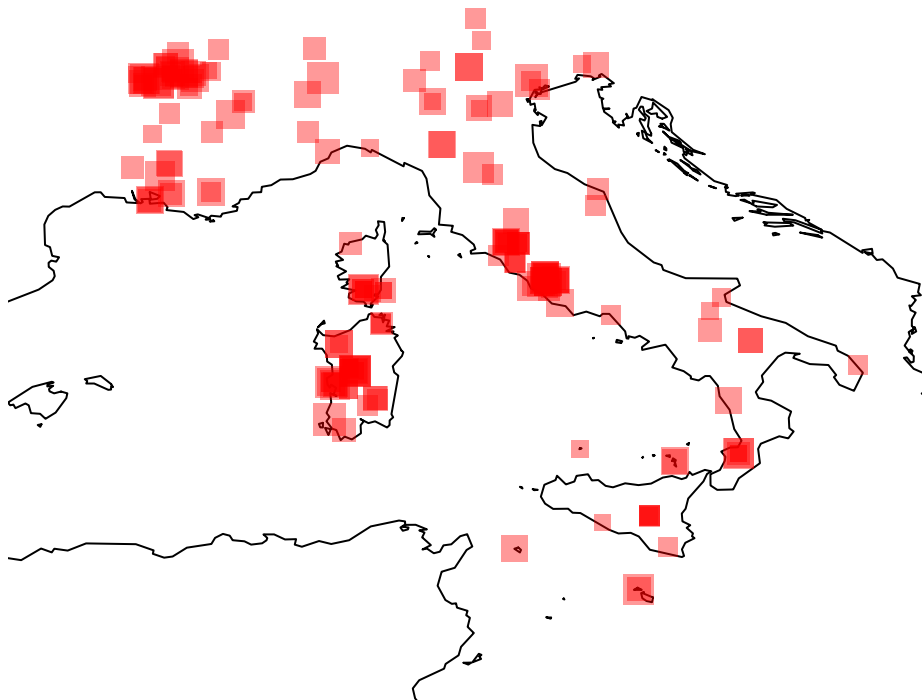

930 cal. BC

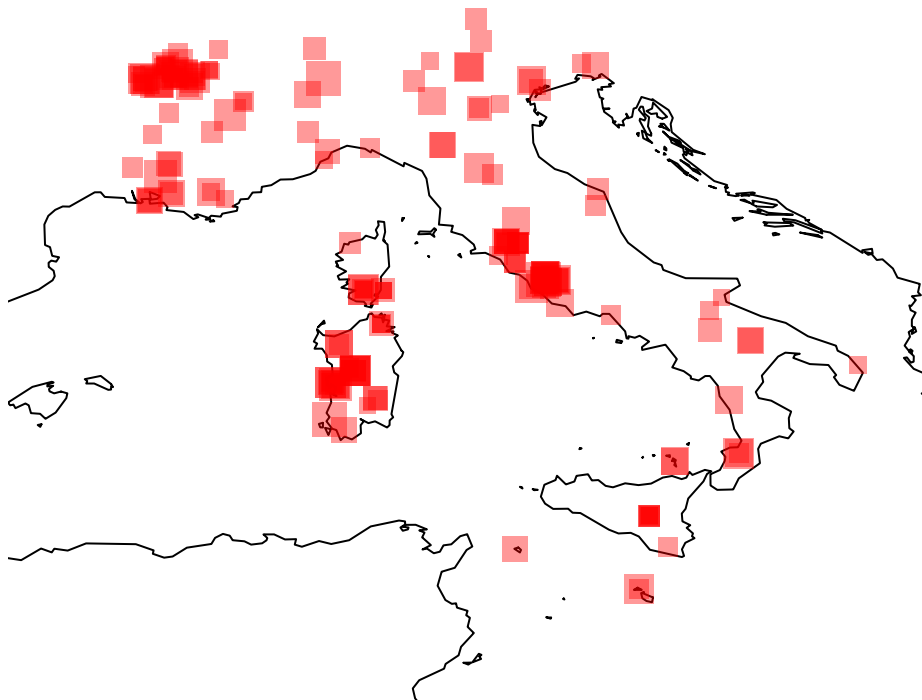



925 cal. BC

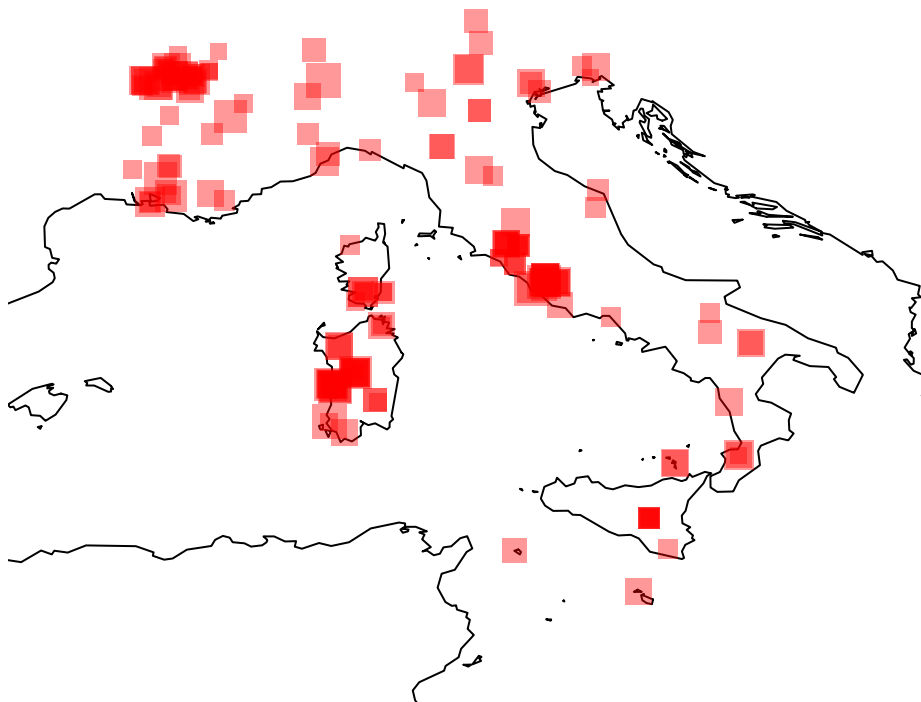



915 cal. BC

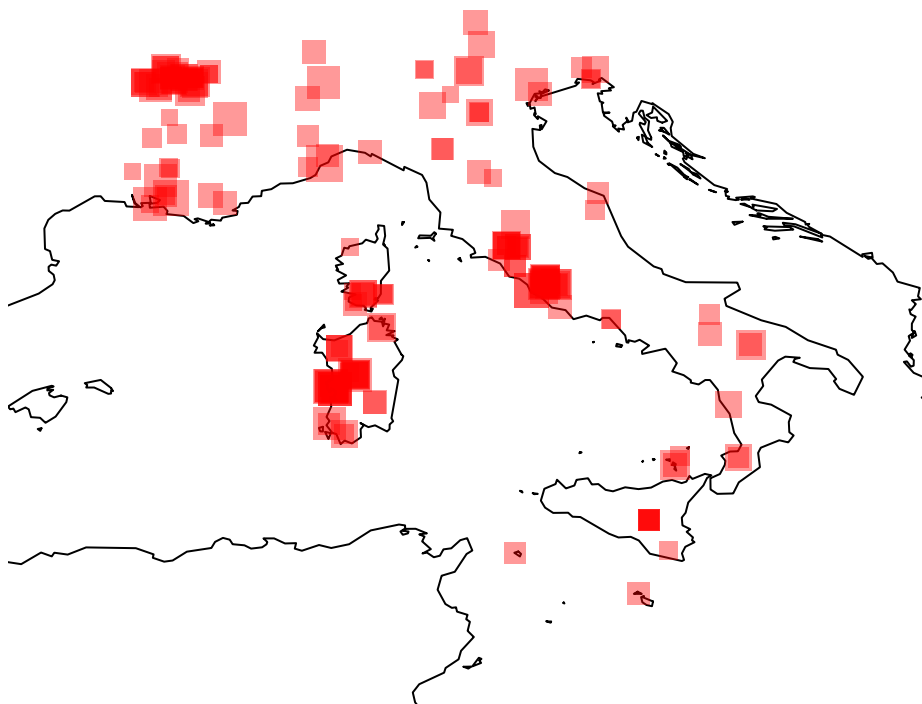

910 cal. BC

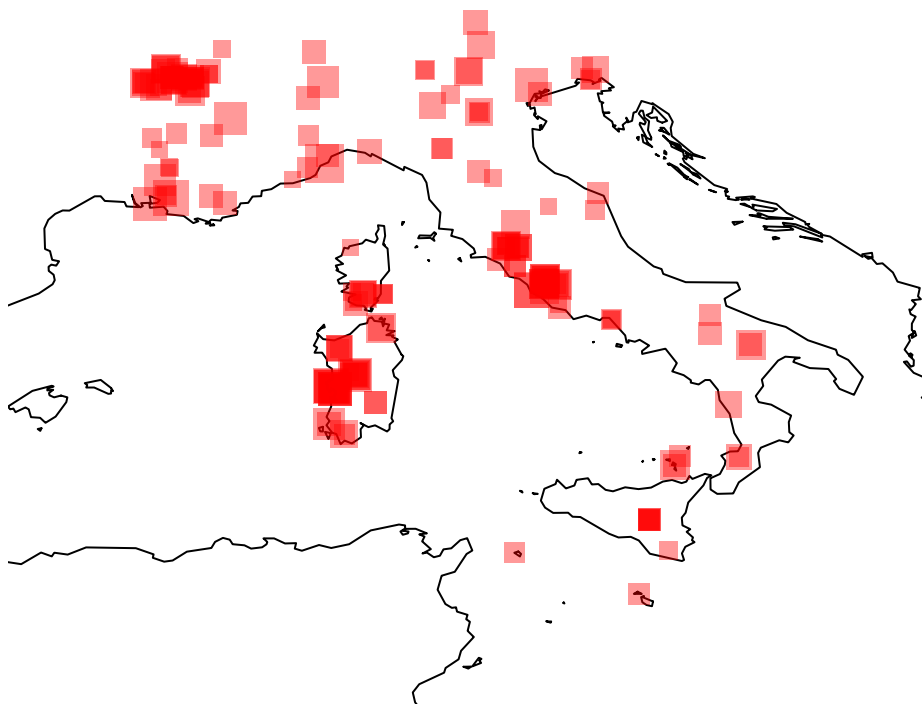

905 cal. BC

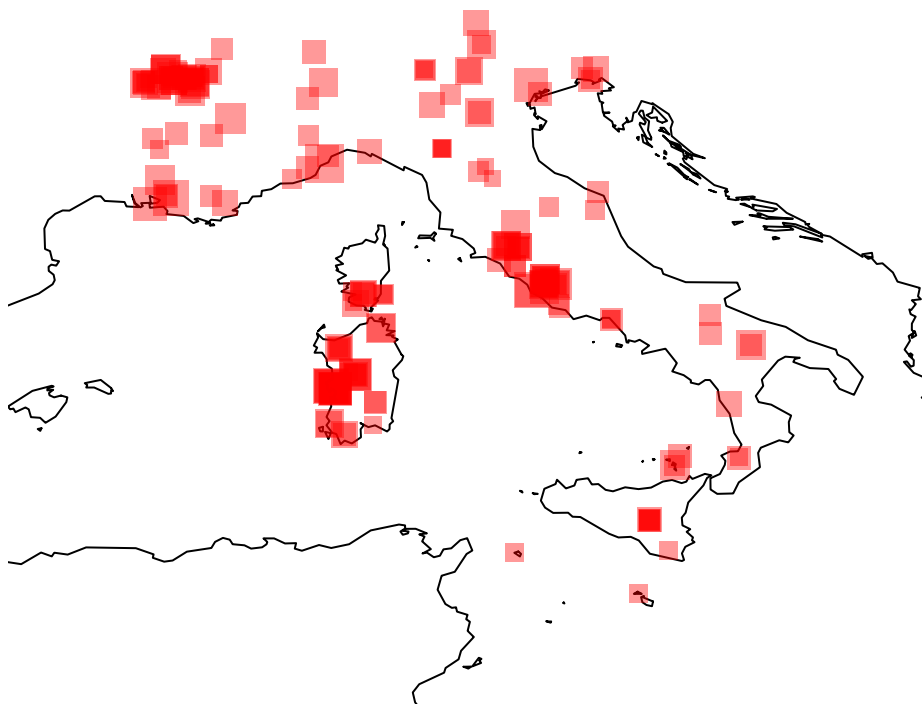

900 cal. BC

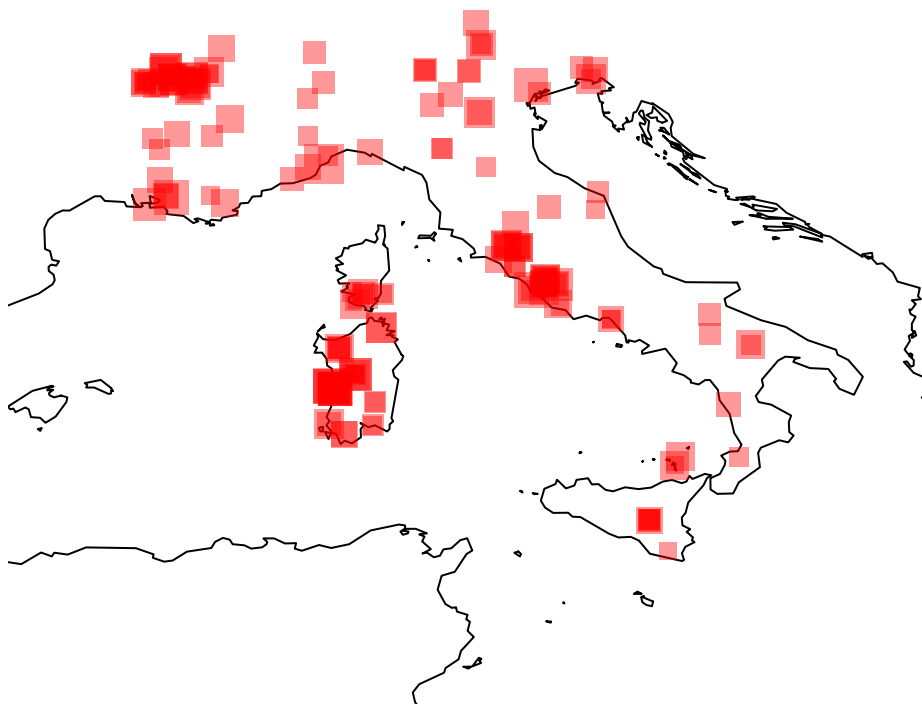

895 cal. BC

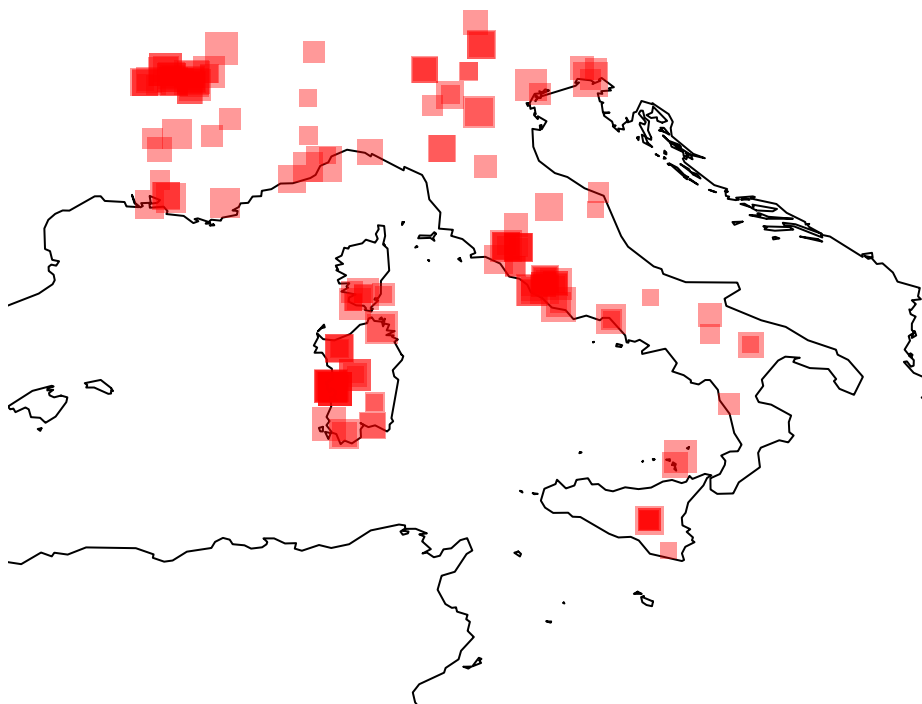

890 cal. BC

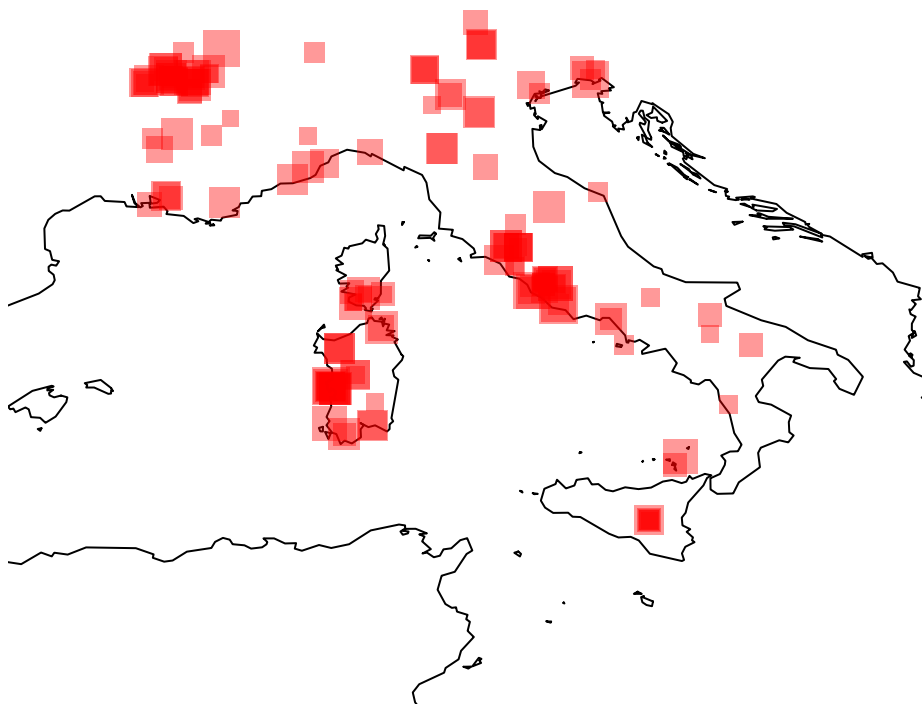



885 cal. BC

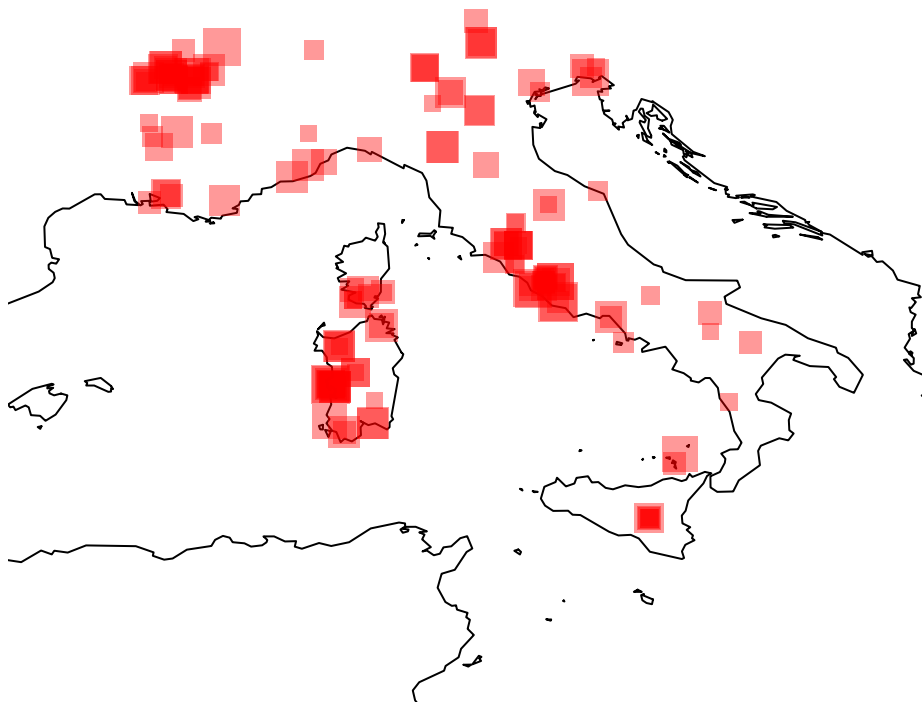

880 cal. BC

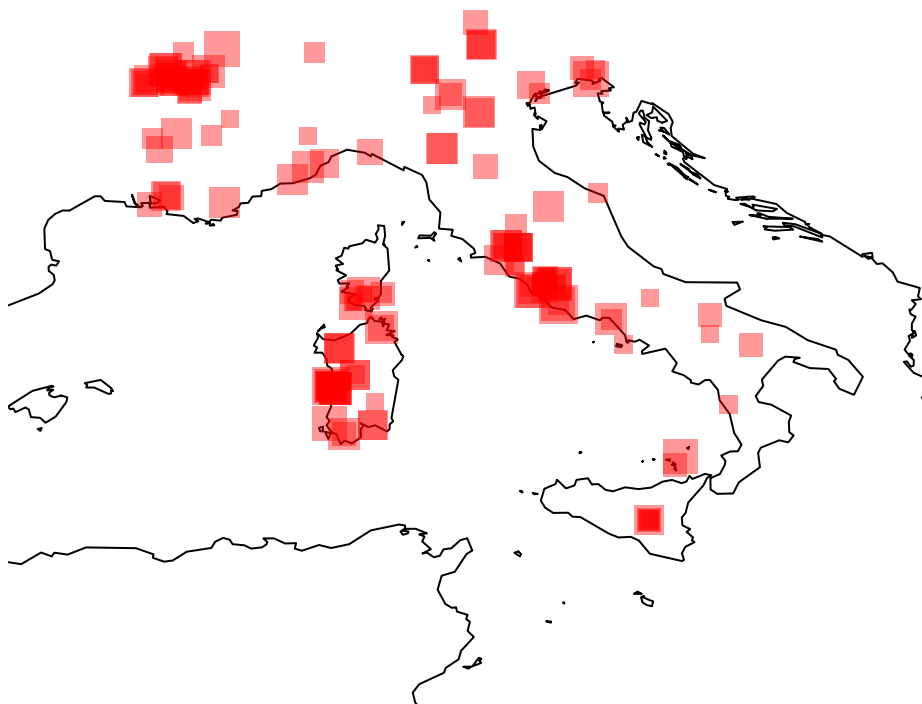

875 cal. BC

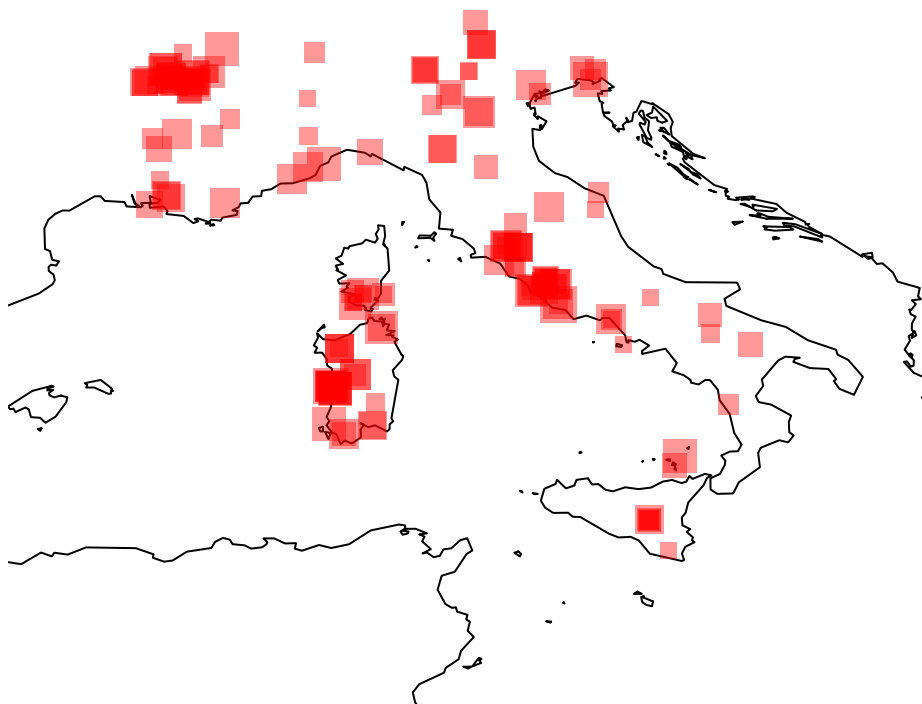

870 cal. BC

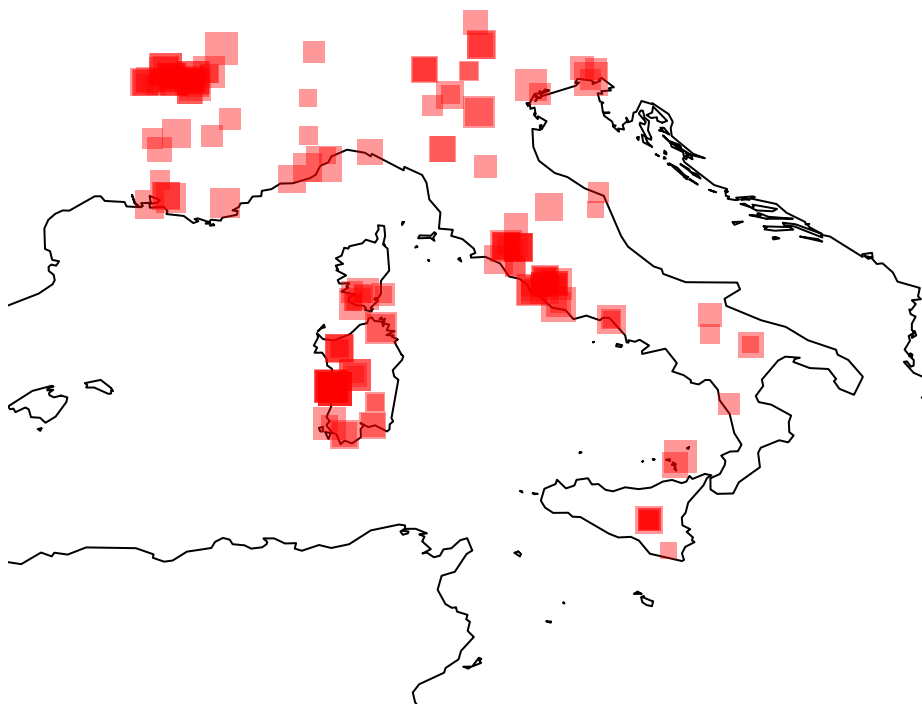

865 cal. BC

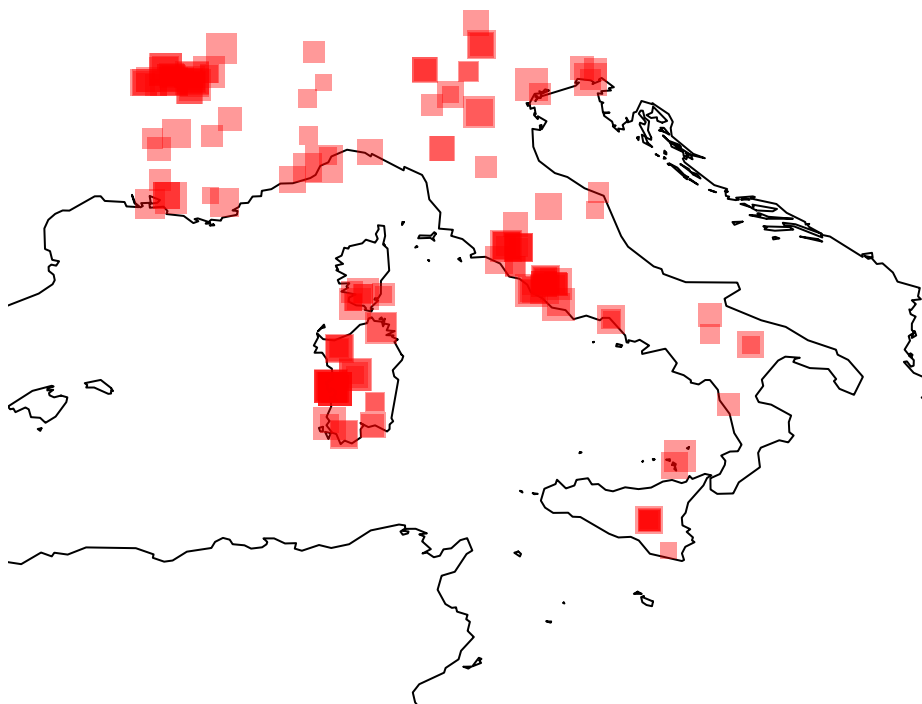

860 cal. BC

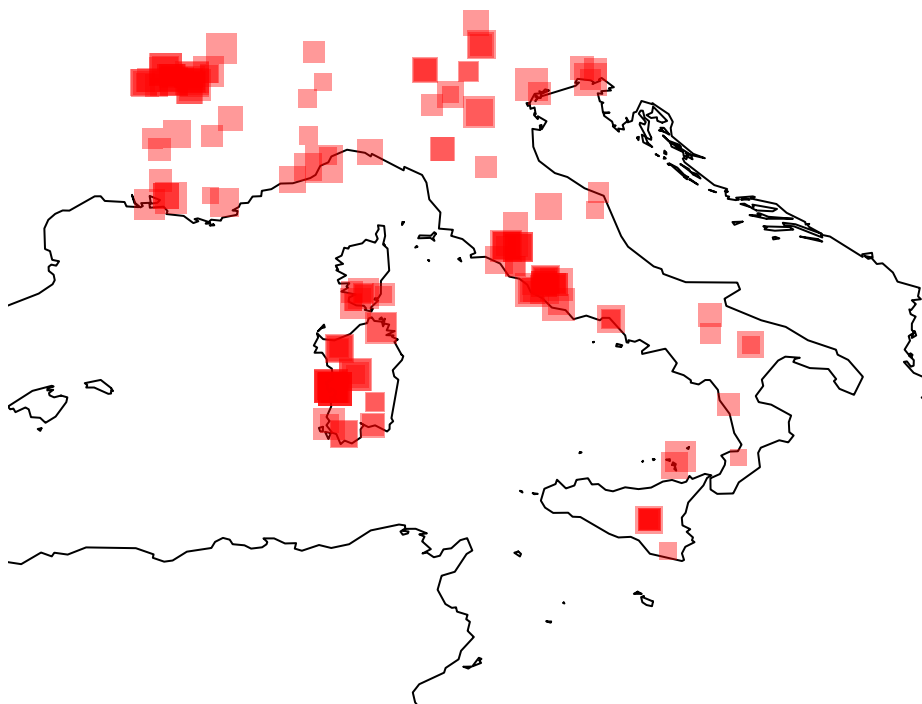

855 cal. BC

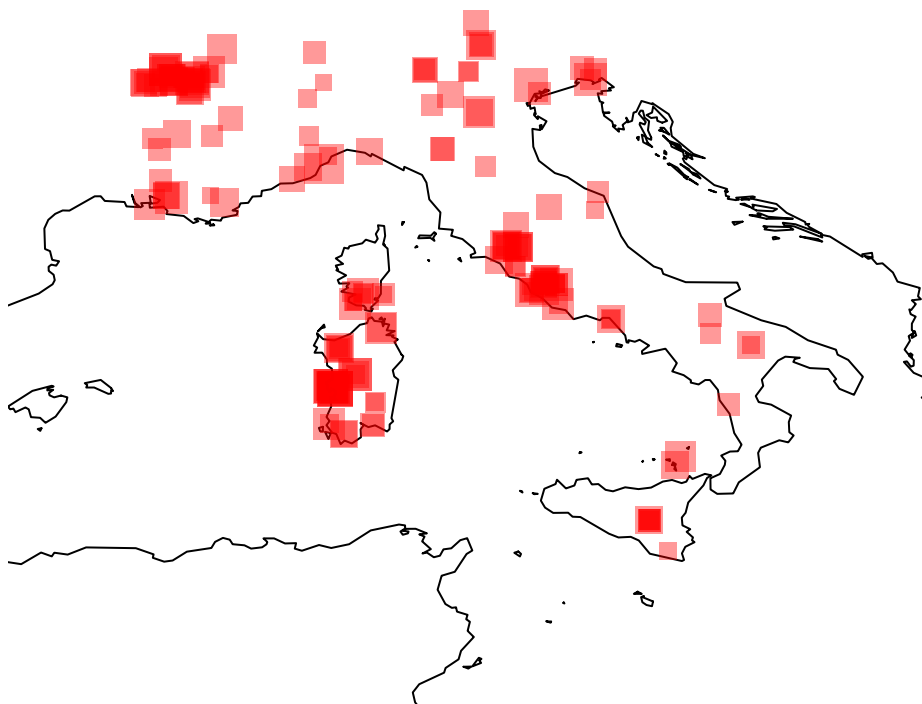

850 cal. BC

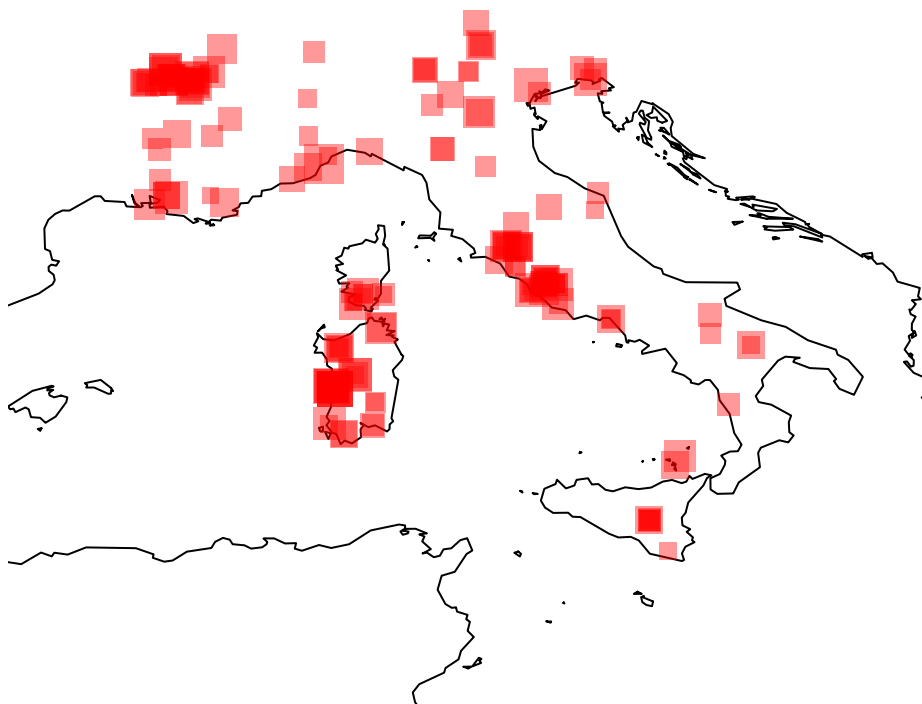



845 cal. BC

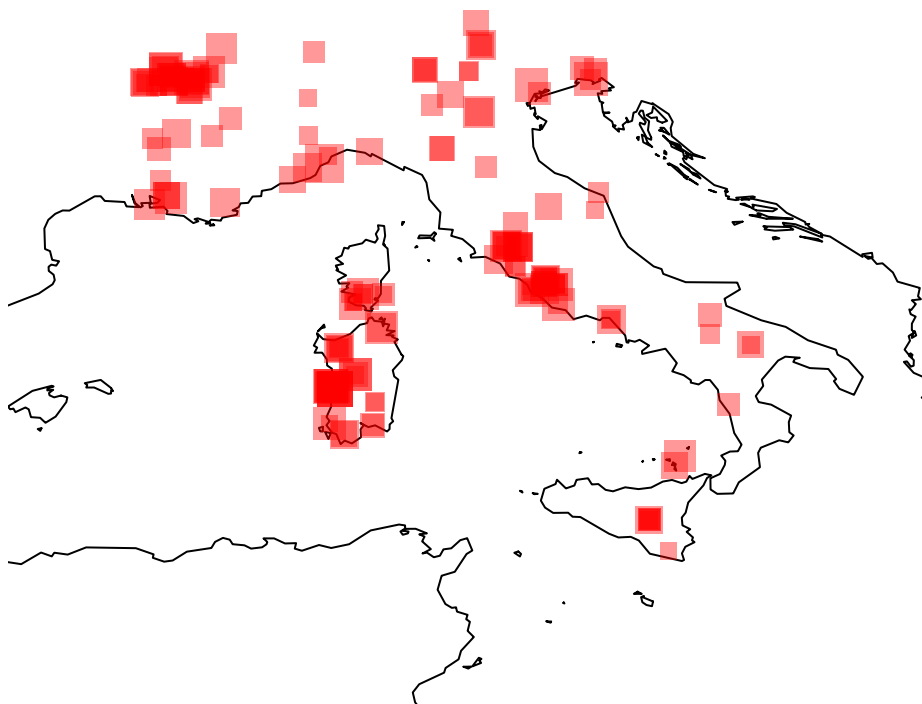

840 cal. BC

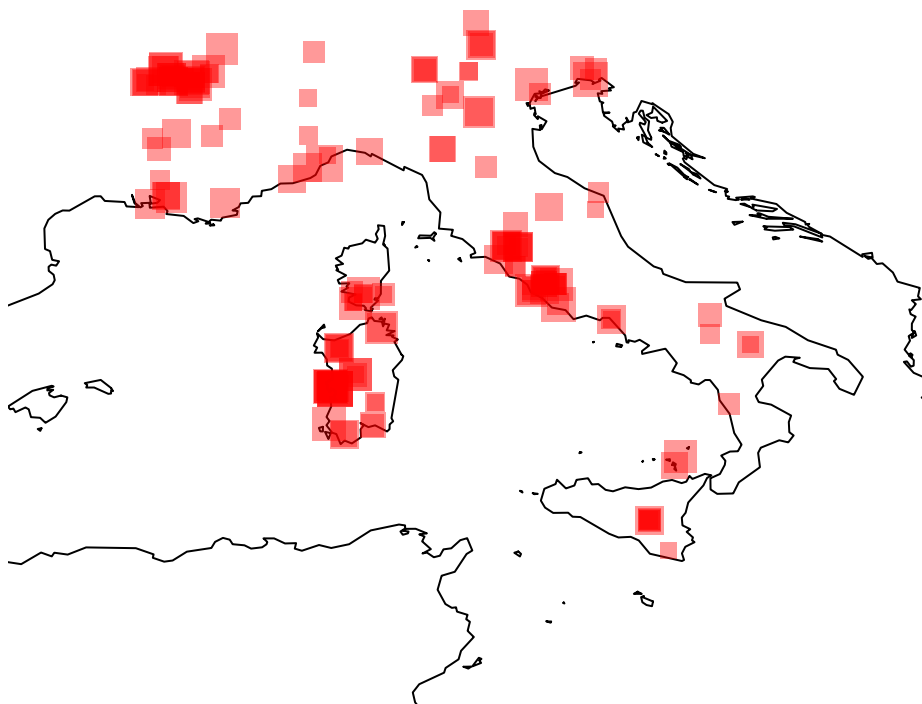

835 cal. BC

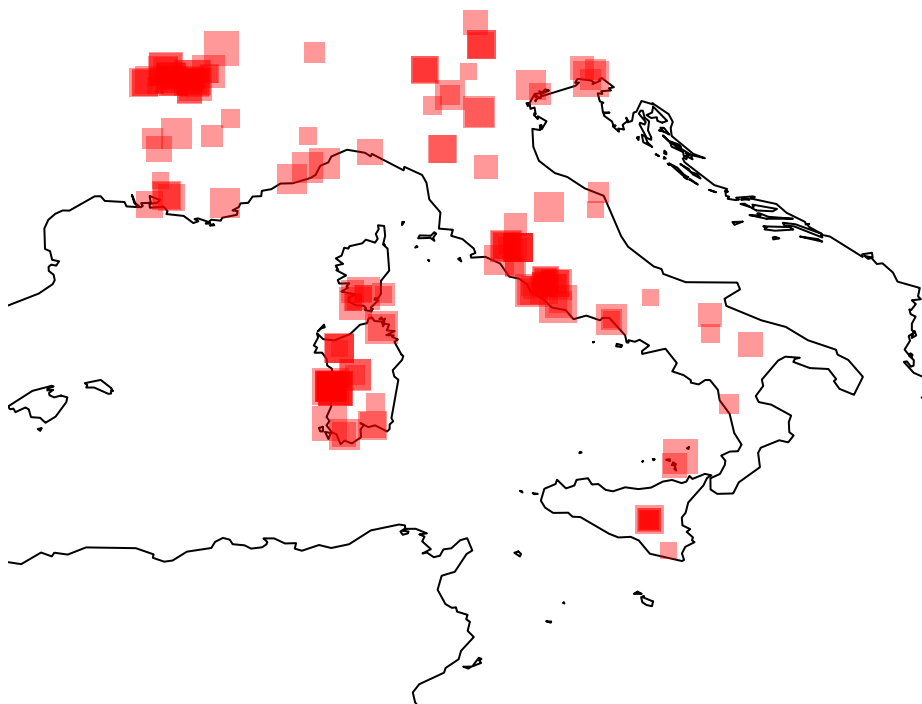

830 cal. BC

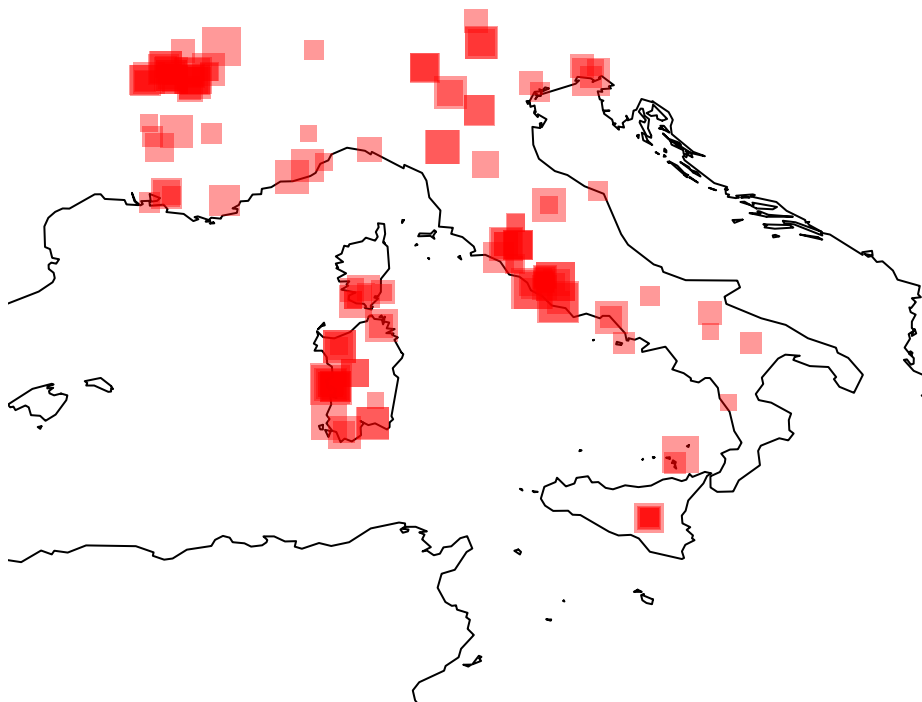

825 cal. BC

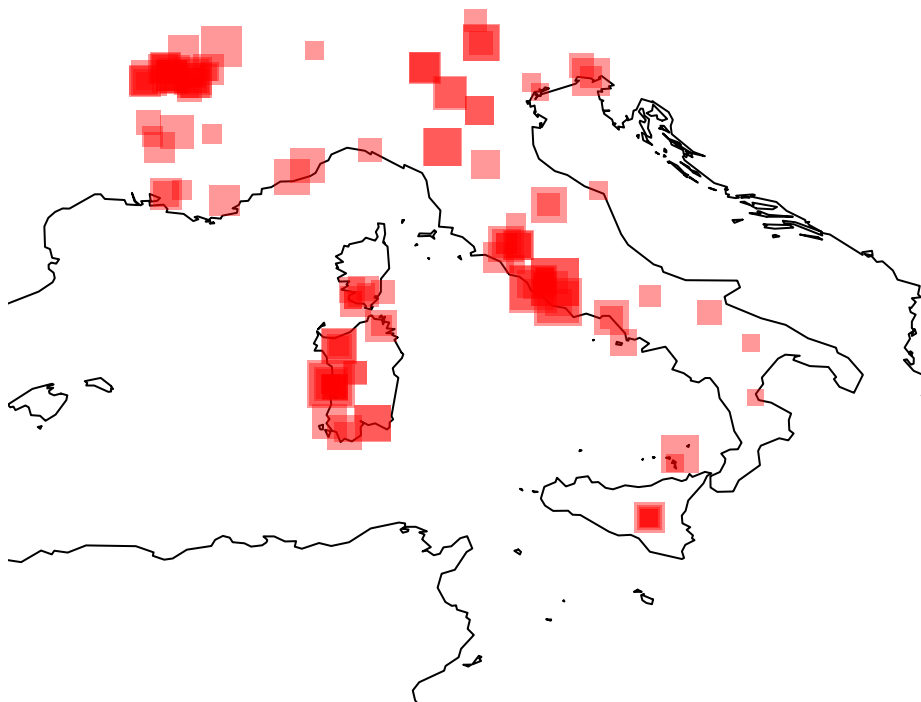

820 cal. BC

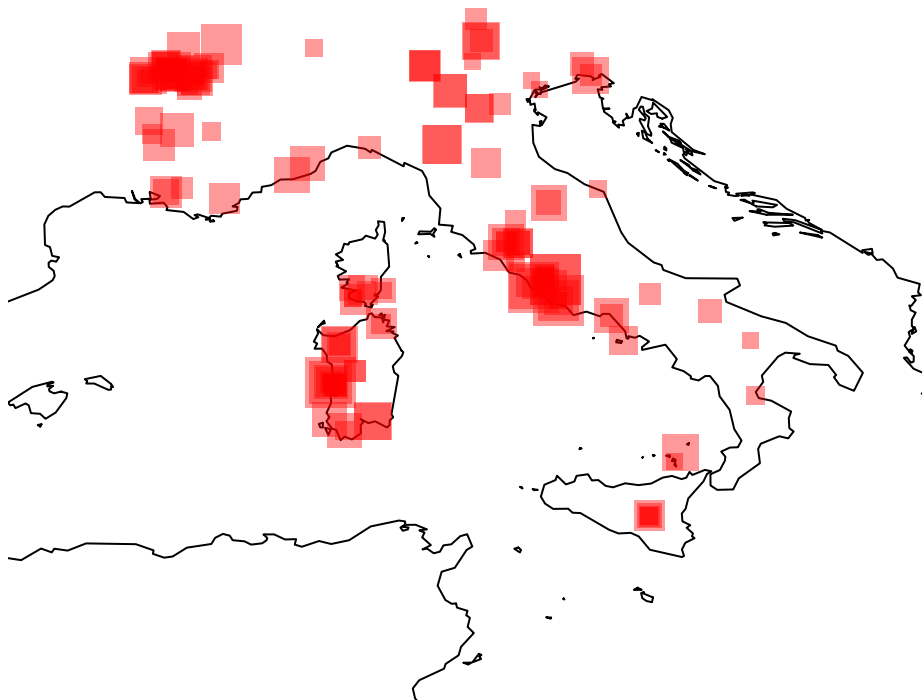

815 cal. BC

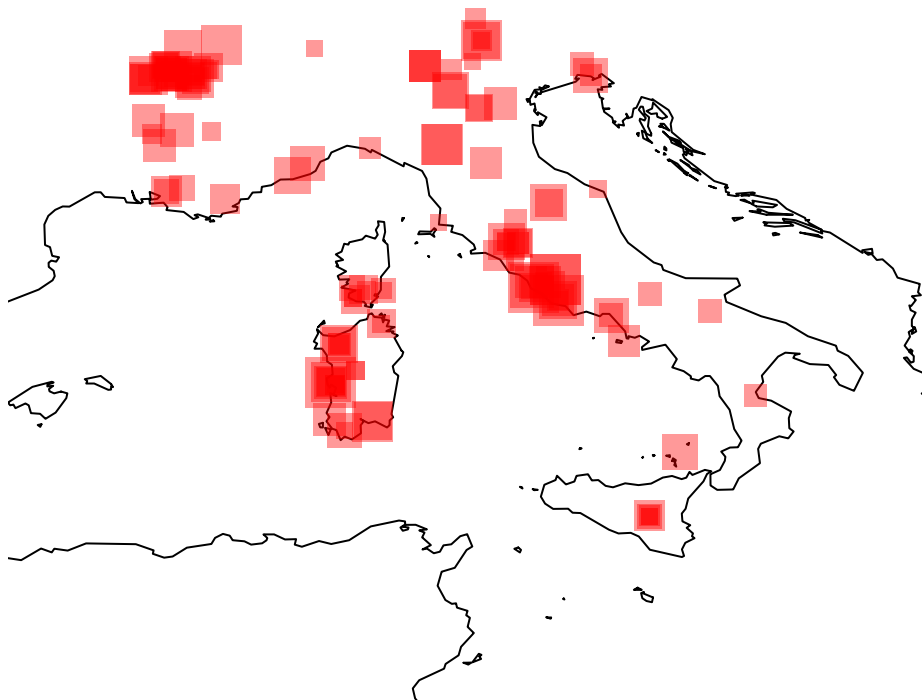

810 cal. BC

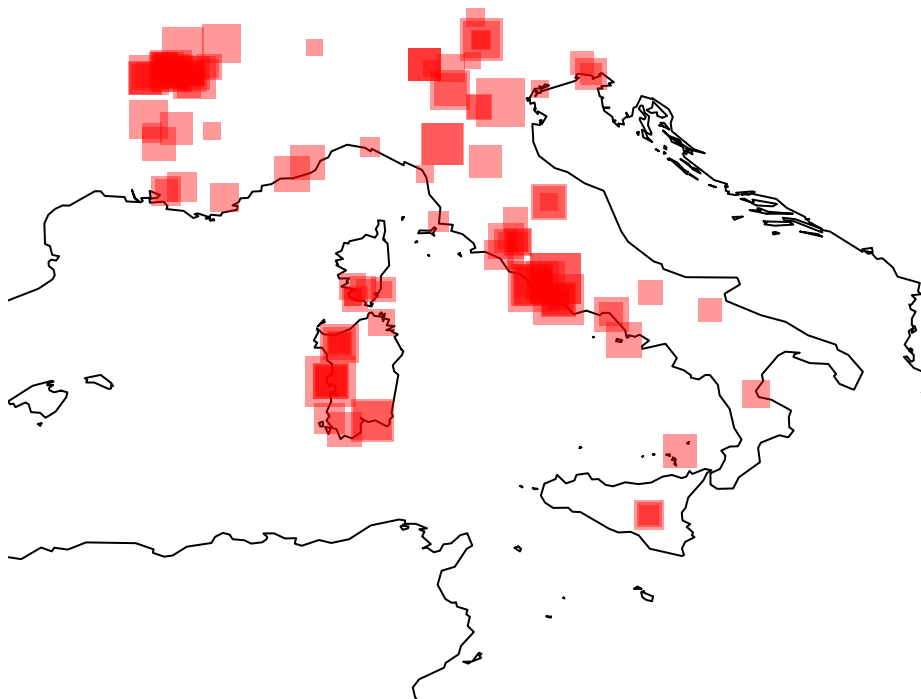



805 cal. BC

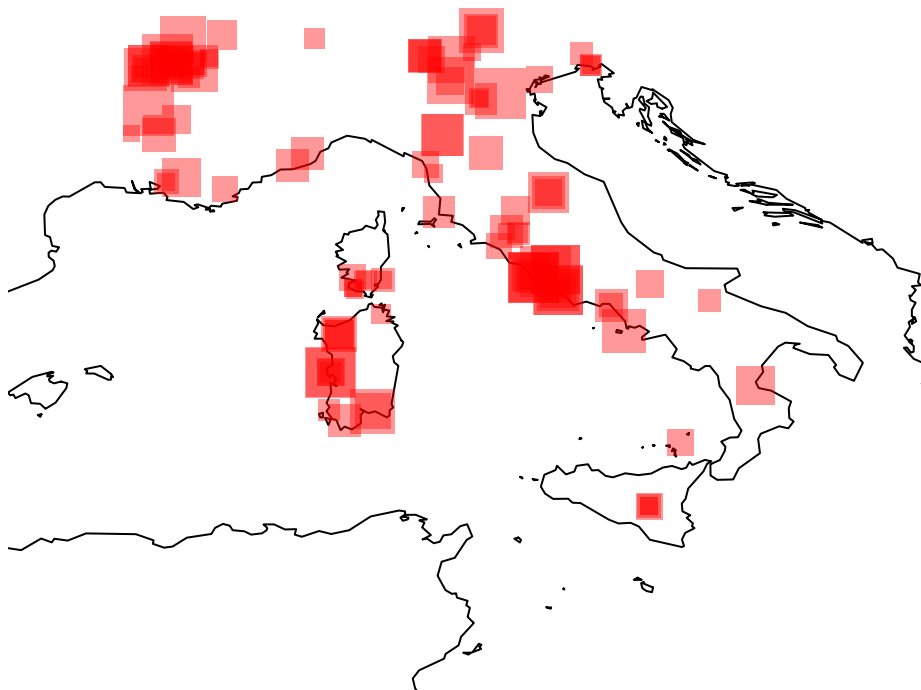

800 cal. BC

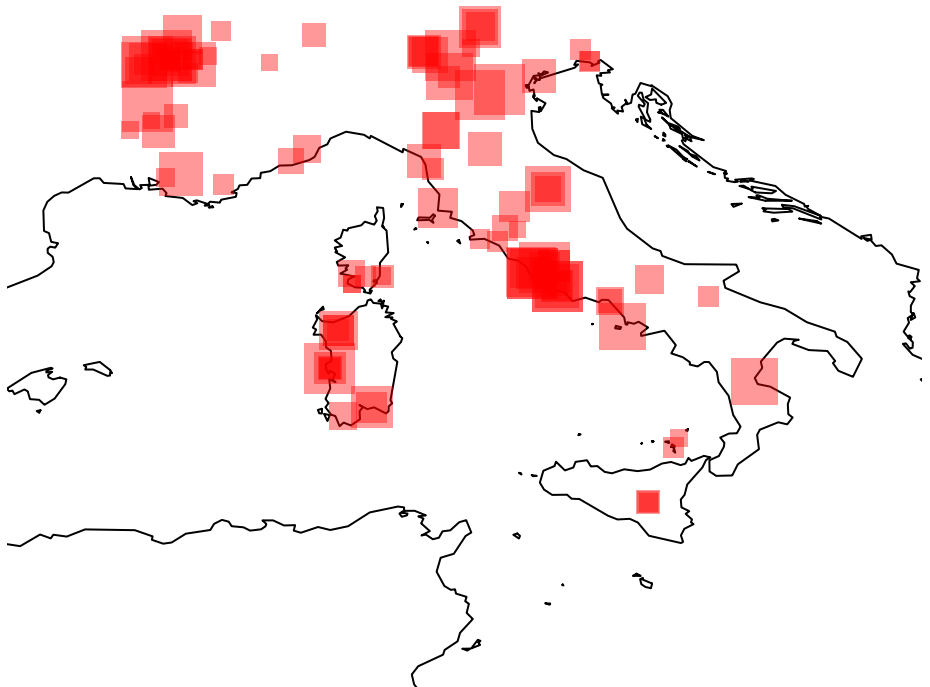

795 cal. BC

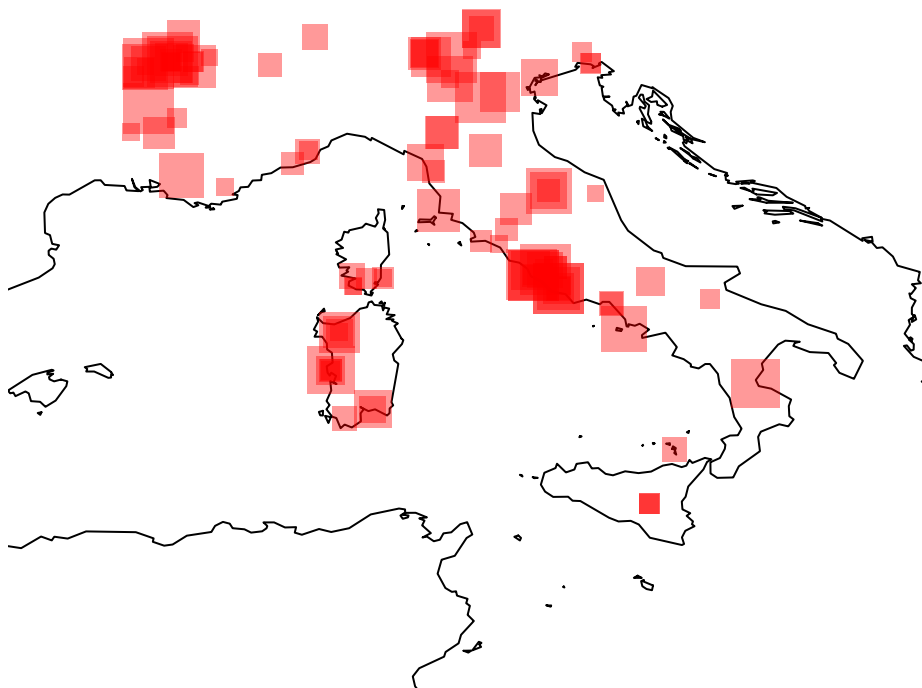

790 cal. BC

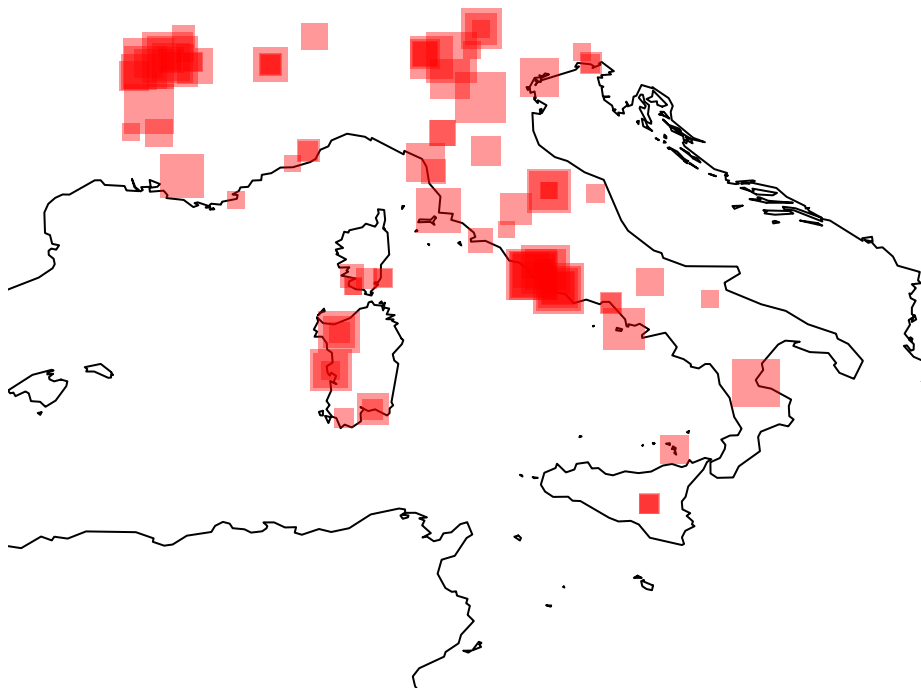

785 cal. BC

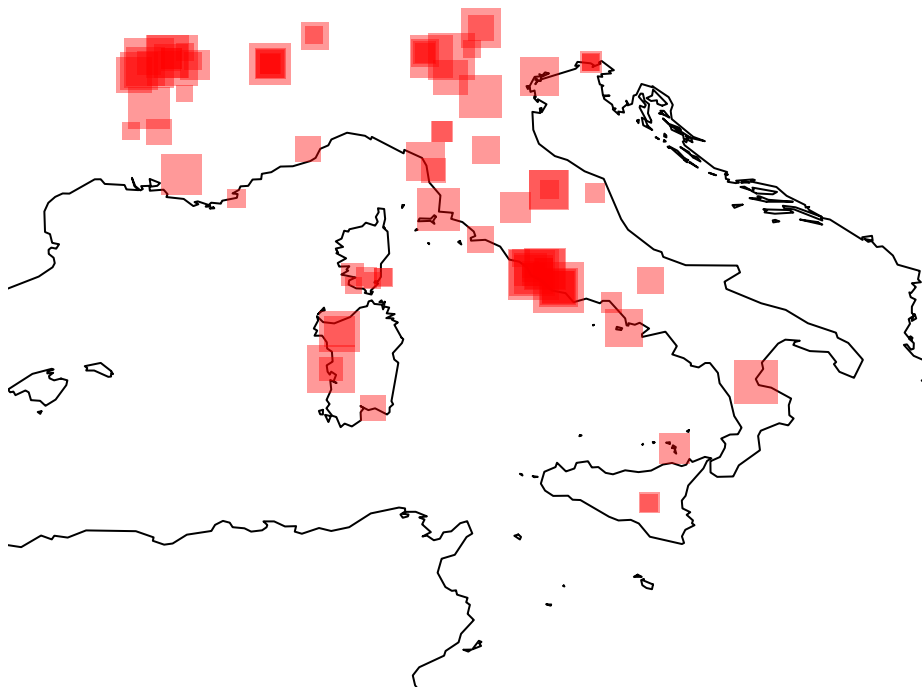

780 cal. BC

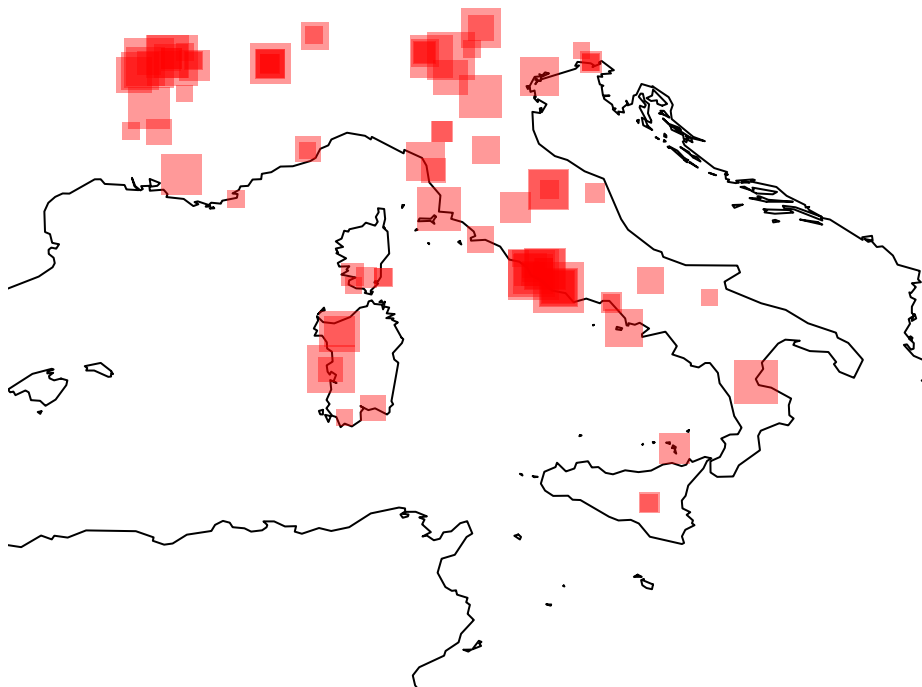

775 cal. BC

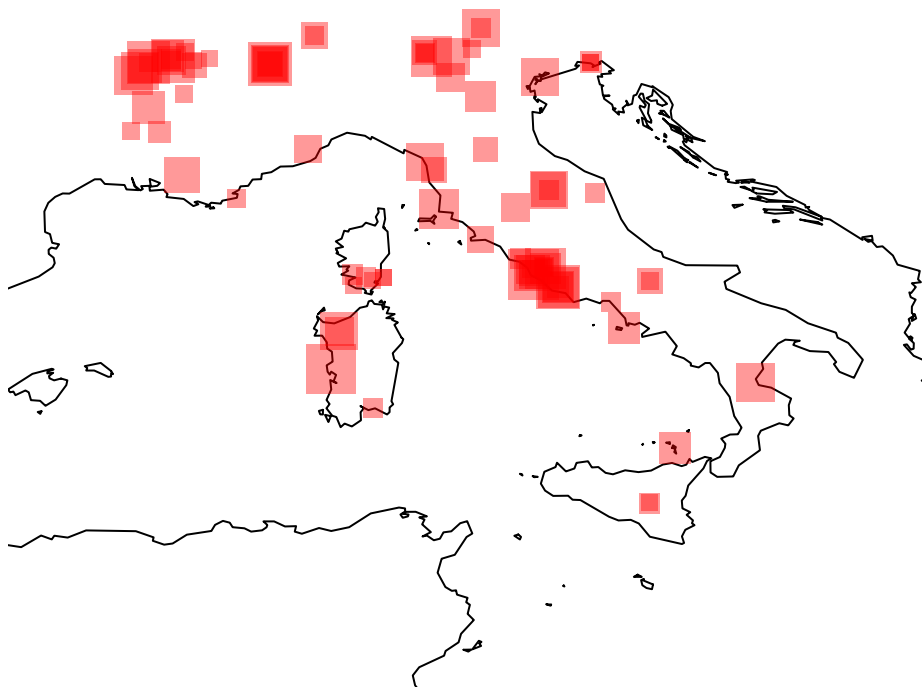

770 cal. BC

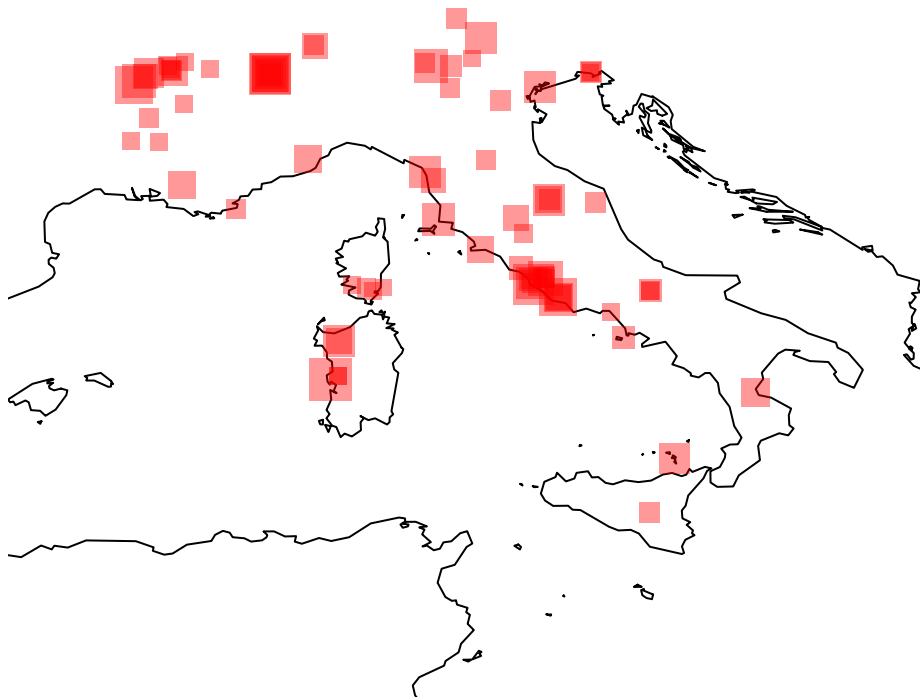



765 cal. BC

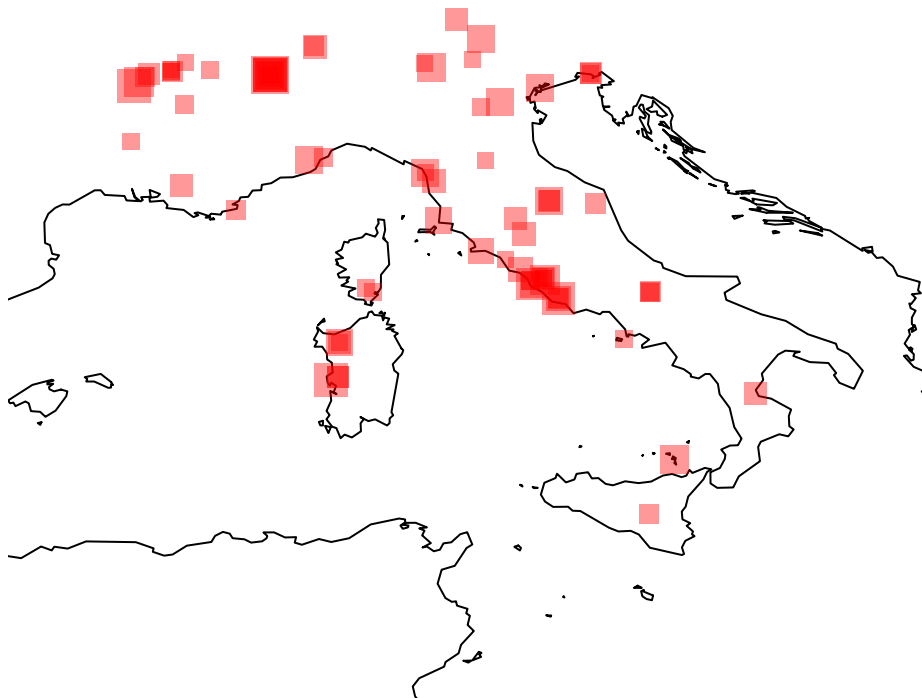

760 cal. BC

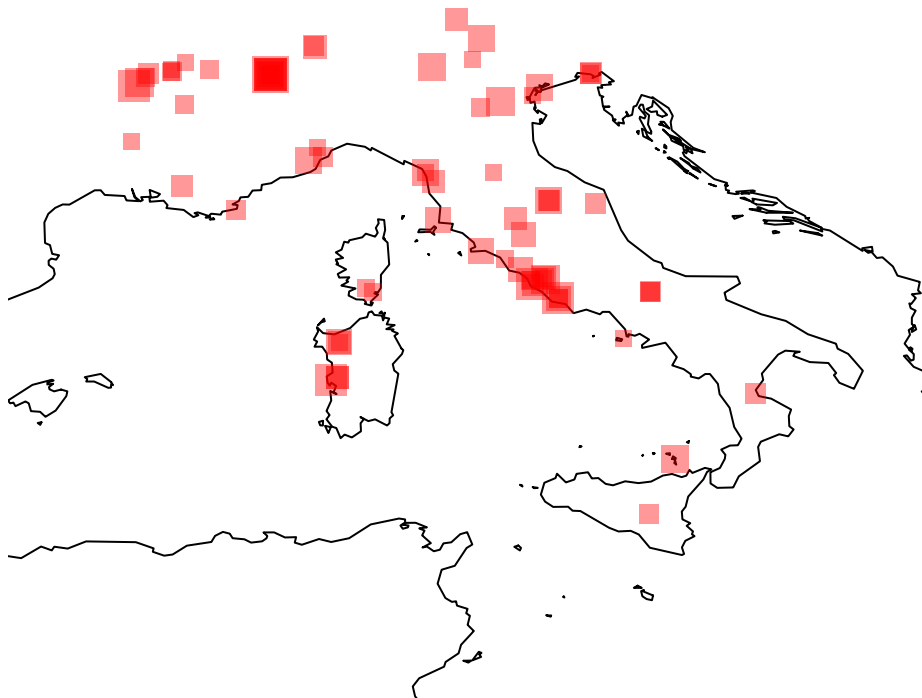

755 cal. BC

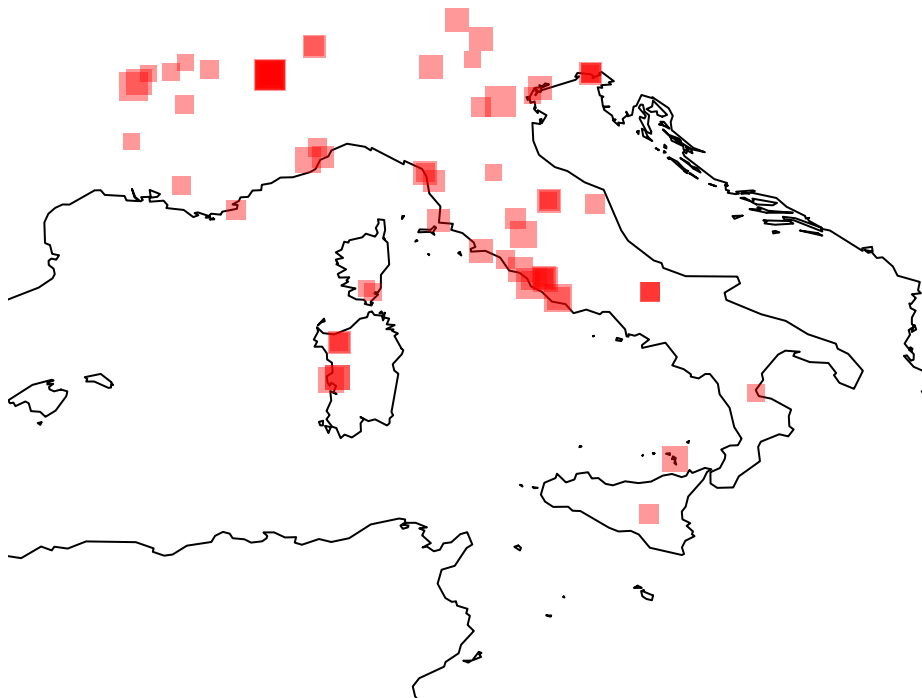

750 cal. BC

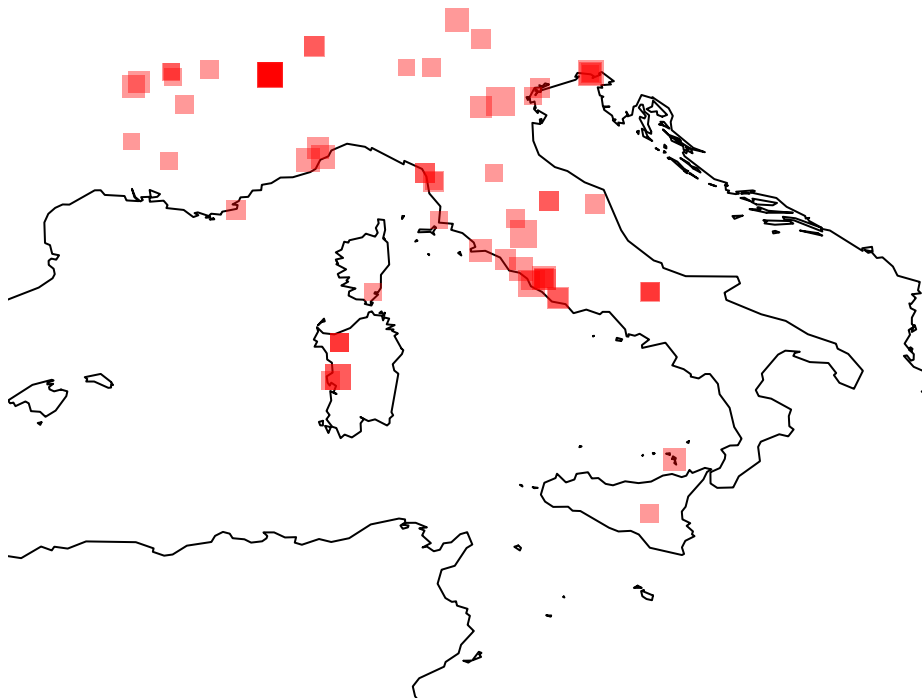

745 cal. BC

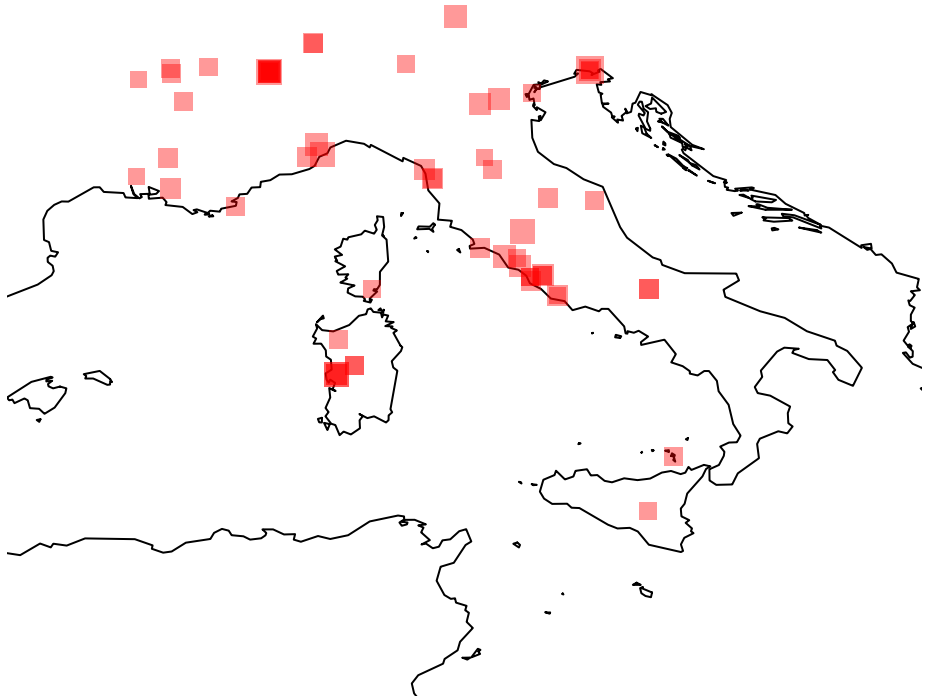



735 cal. BC

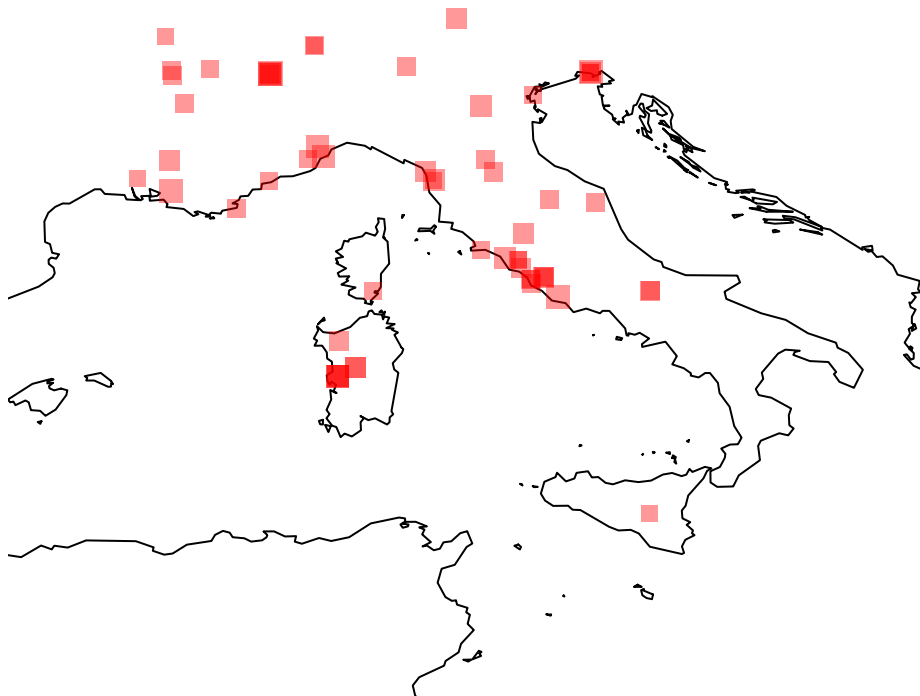

730 cal. BC

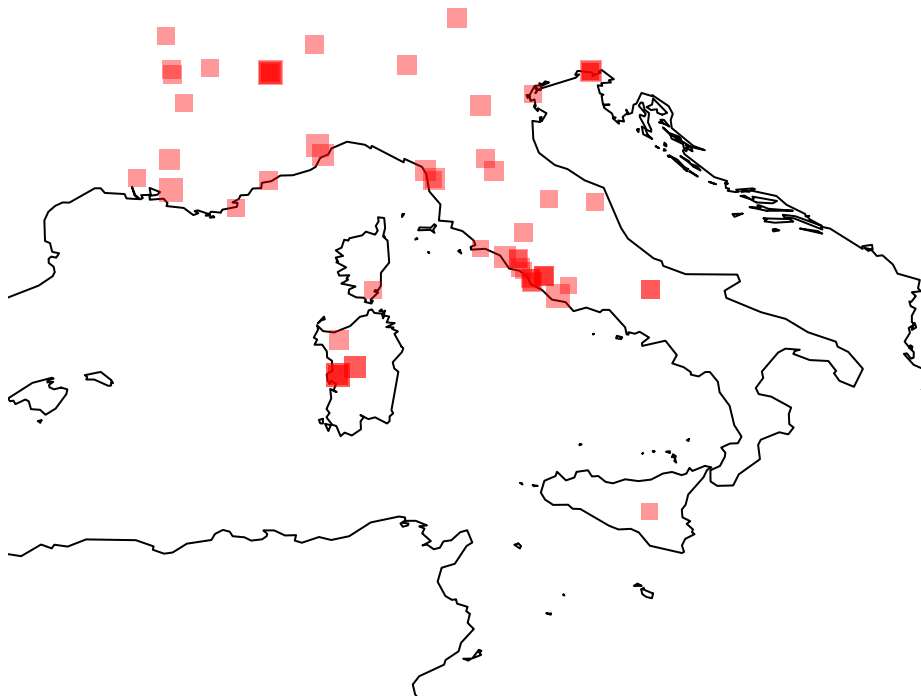



725 cal. BC

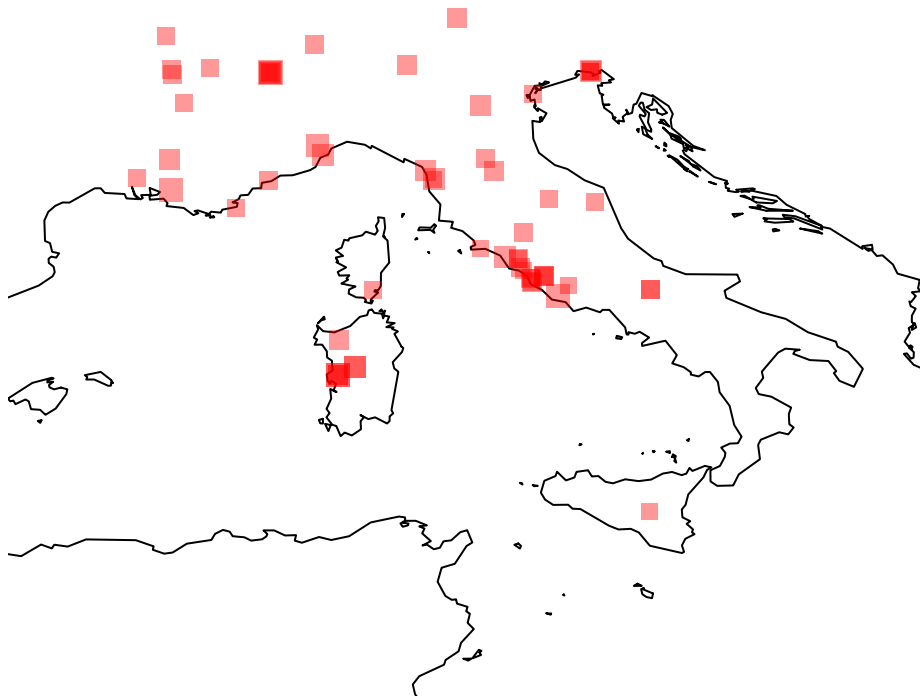

720 cal. BC

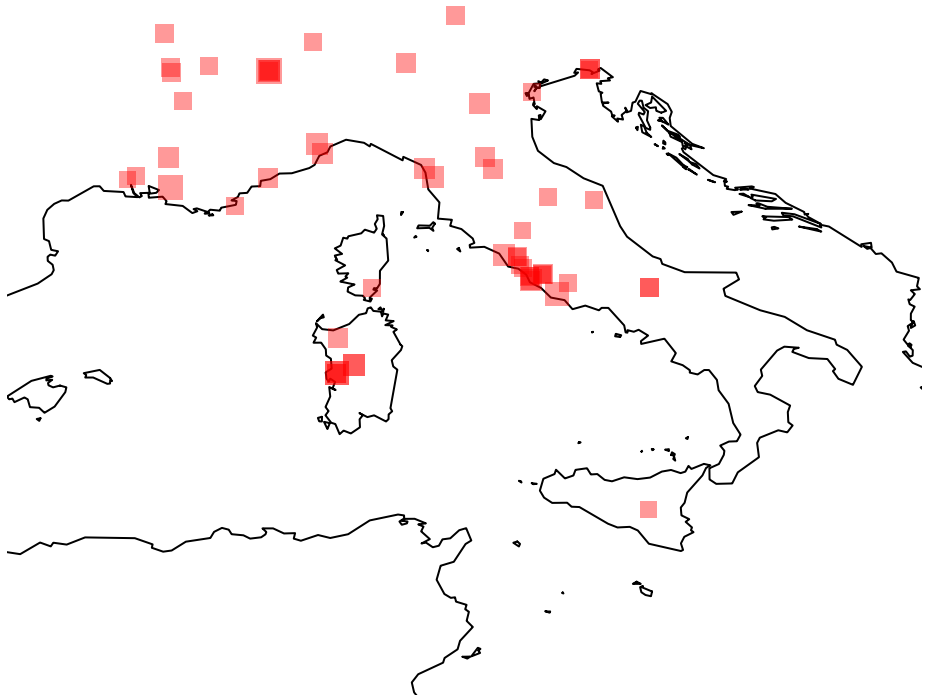

715 cal. BC

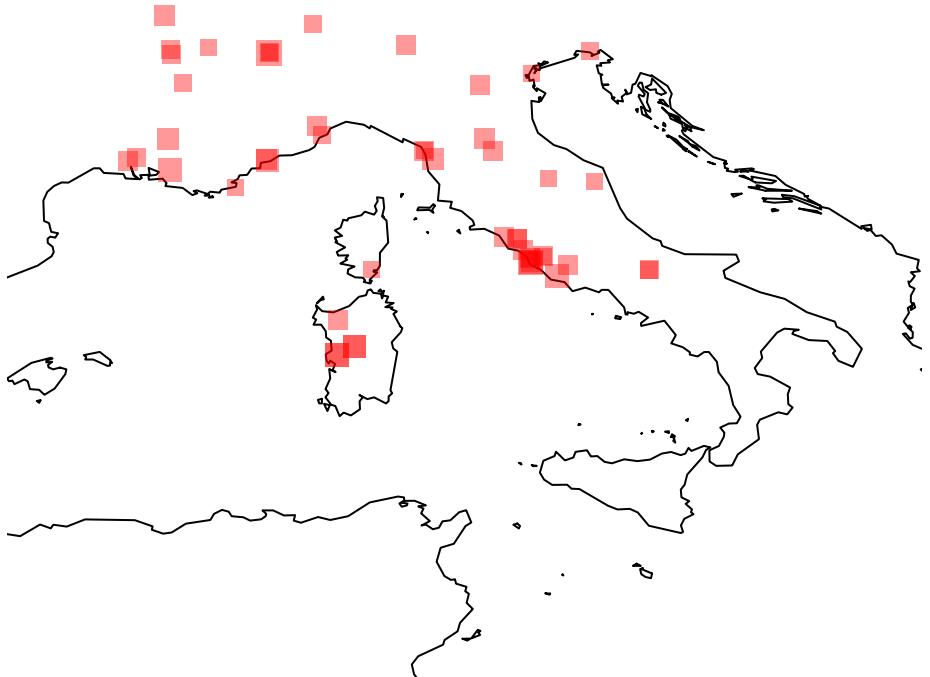

710 cal. BC

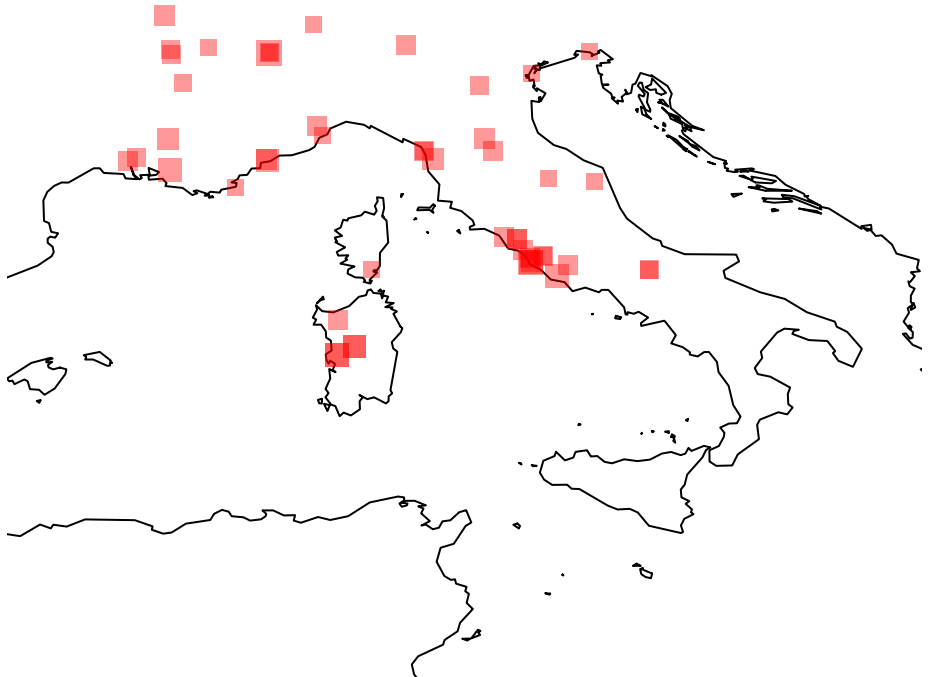

705 cal. BC

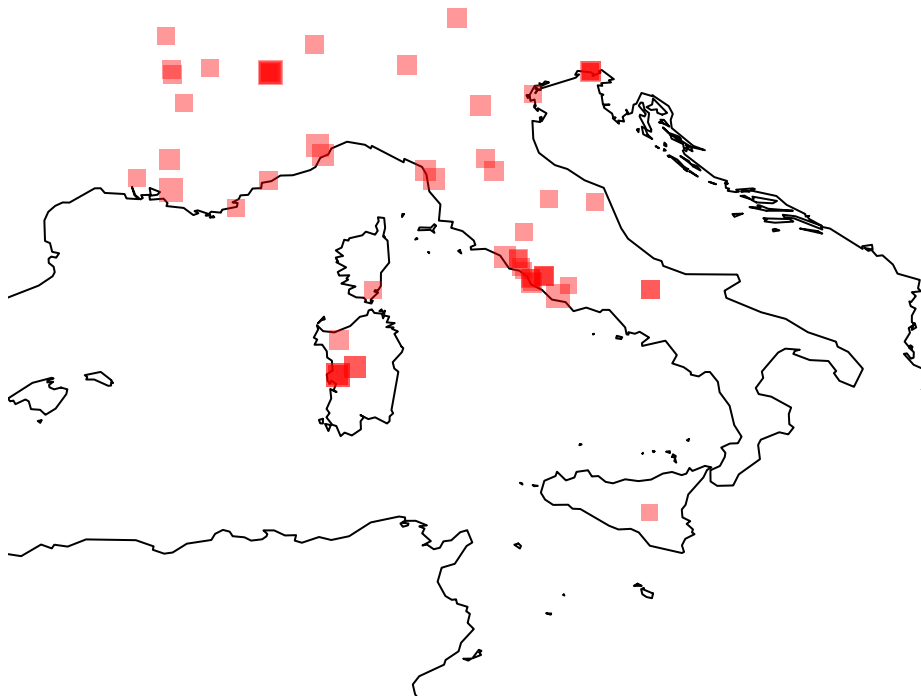

700 cal. BC



695 cal. BC

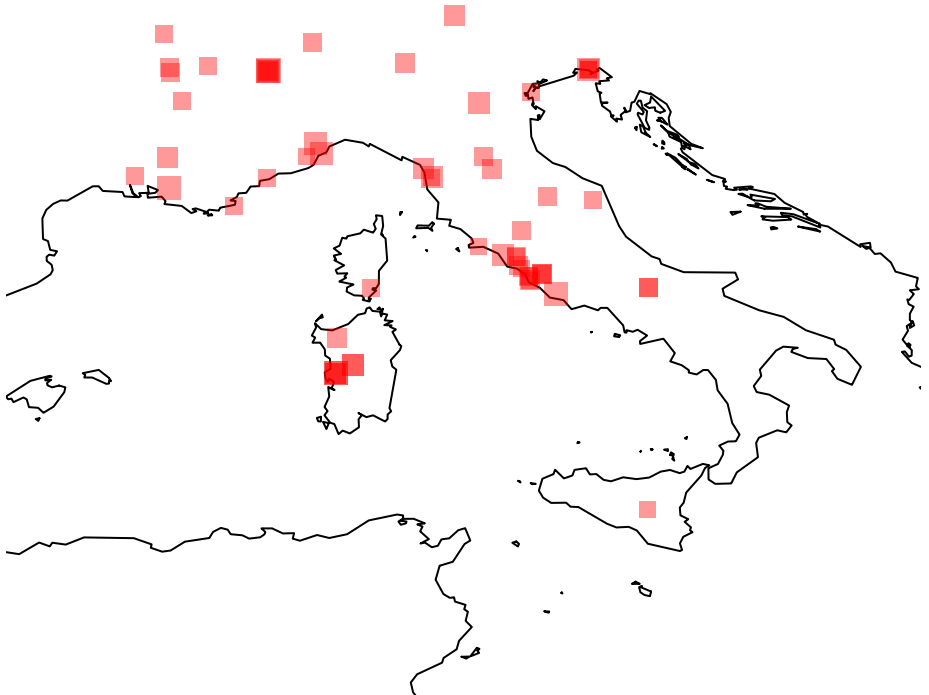

690 cal. BC

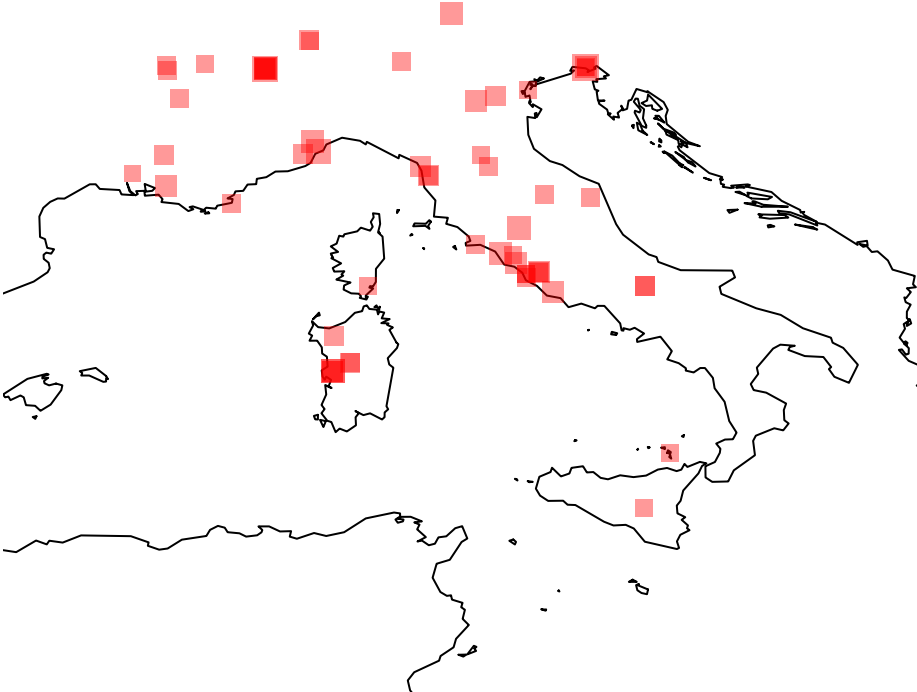



685 cal. BC

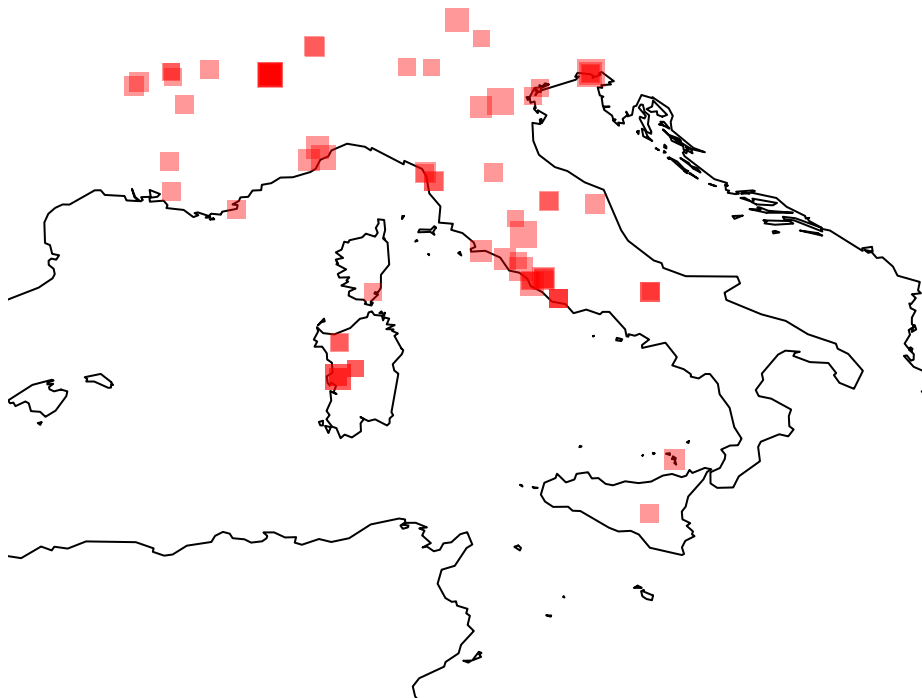

680 cal. BC

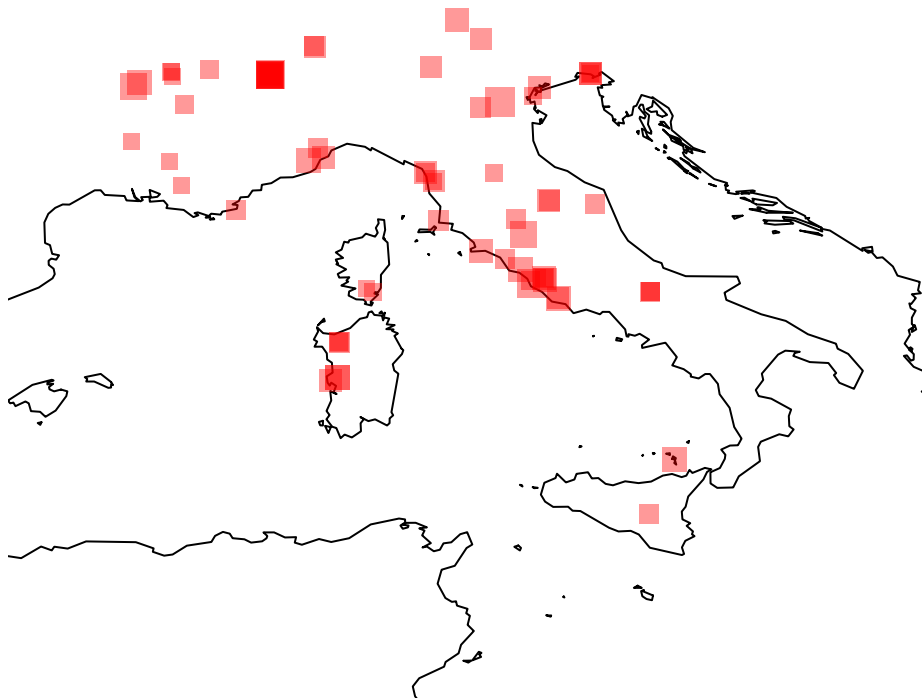

675 cal. BC

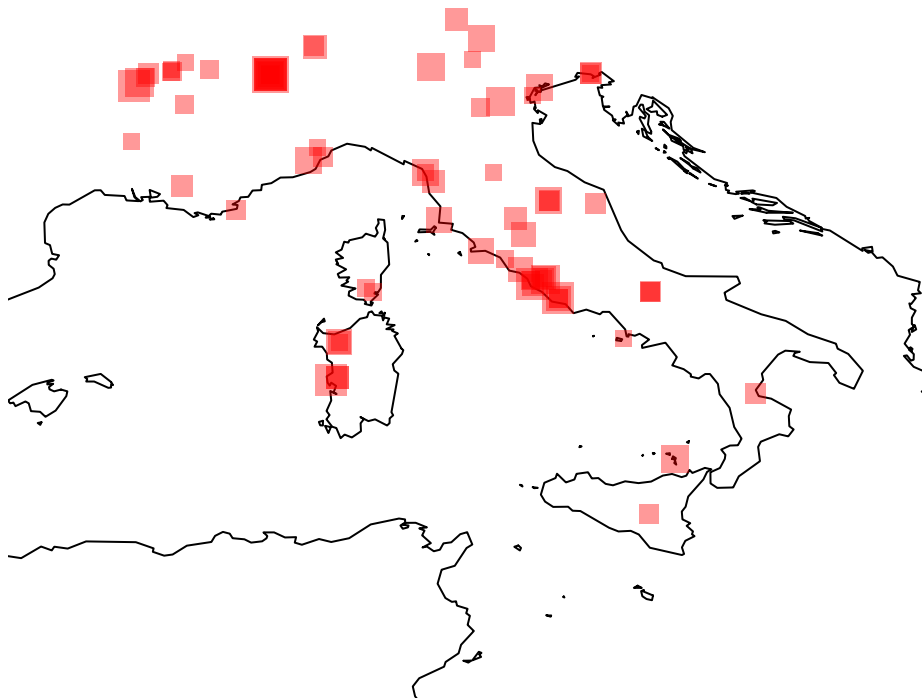

670 cal. BC

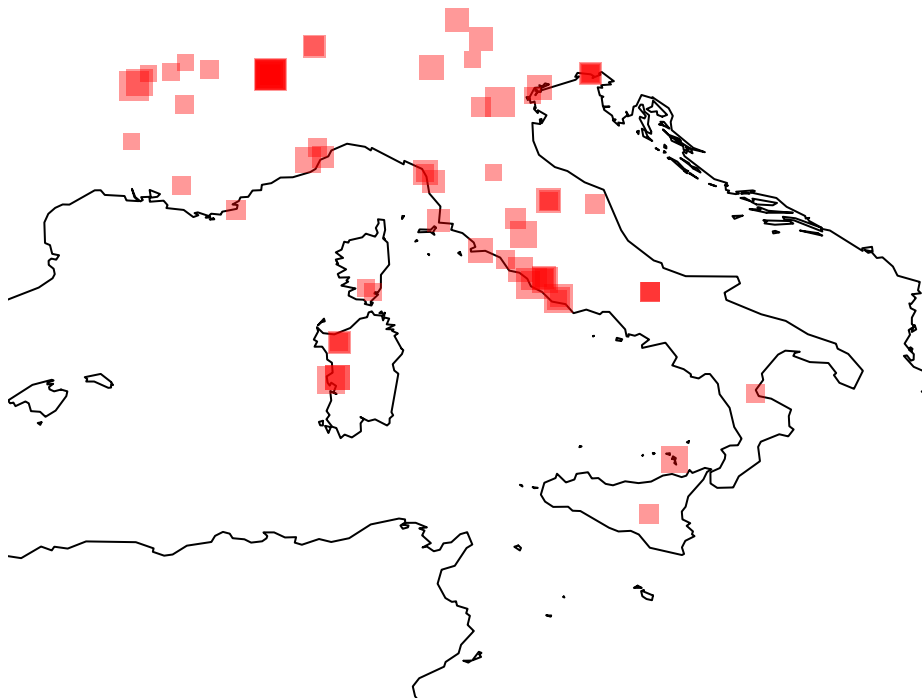

665 cal. BC

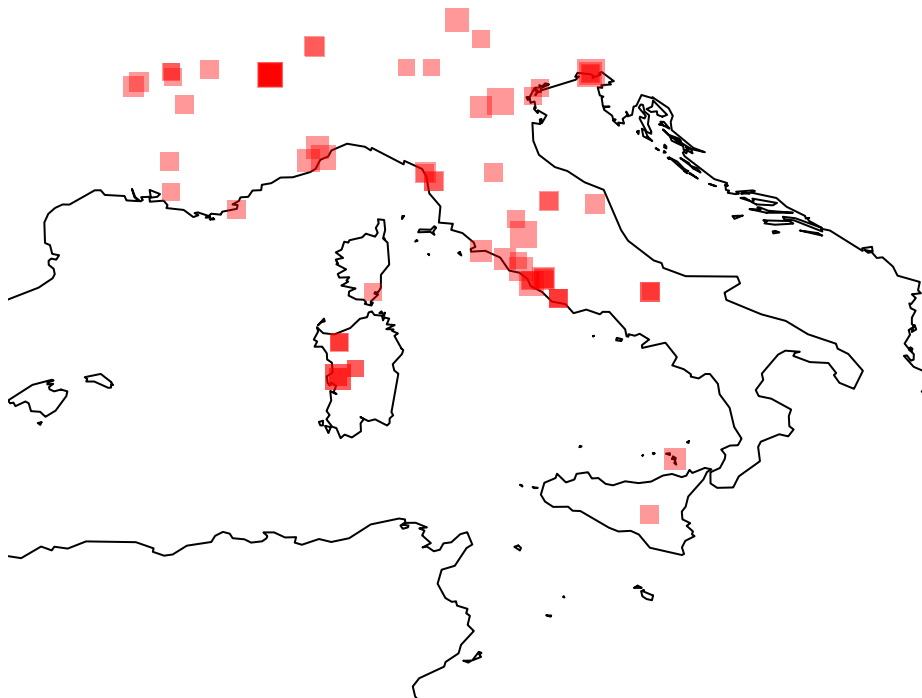

660 cal. BC

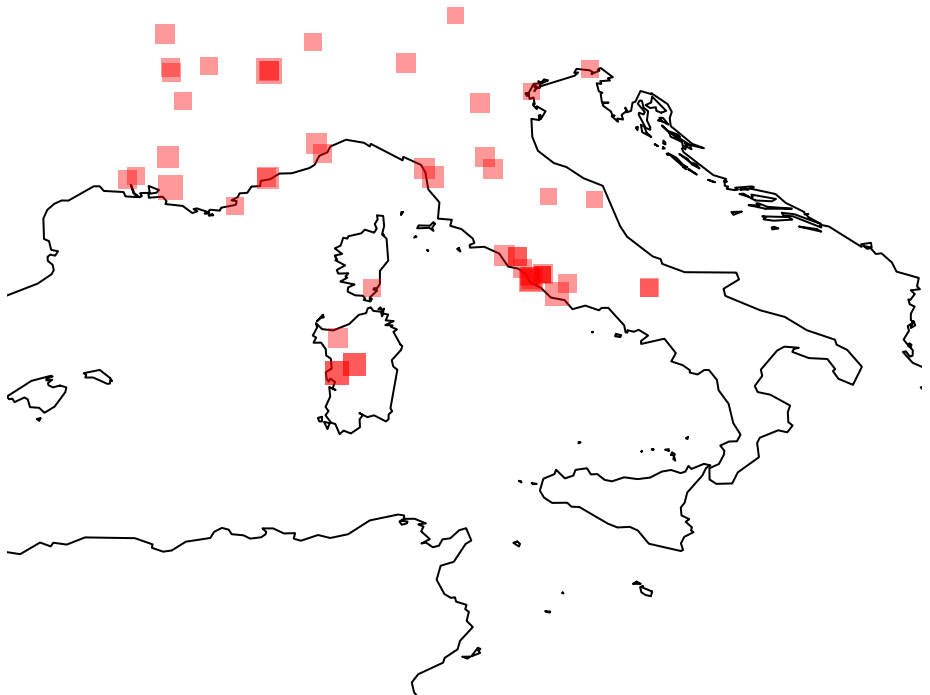

655 cal. BC

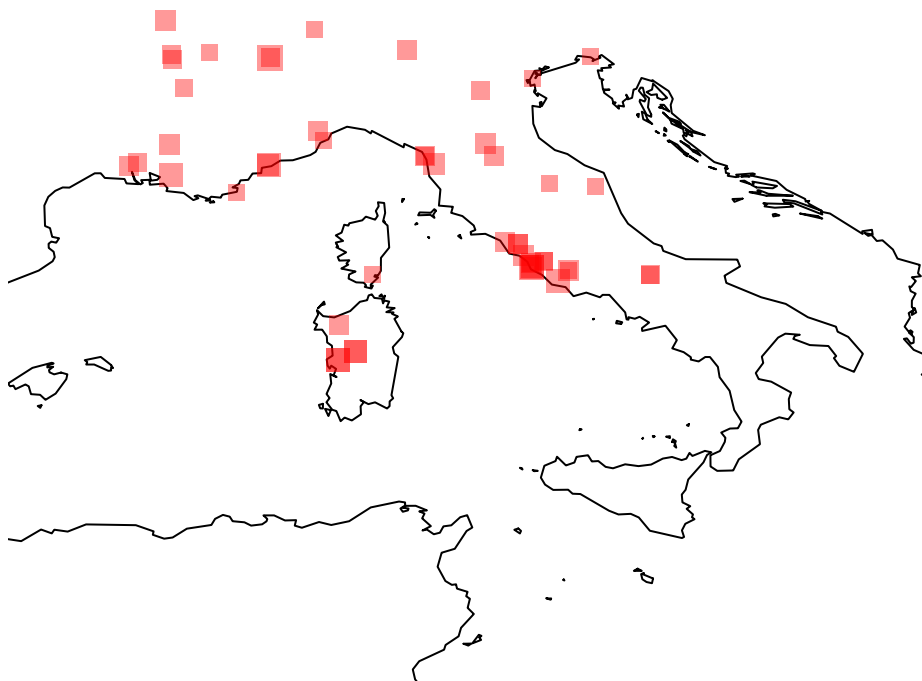

650 cal. BC

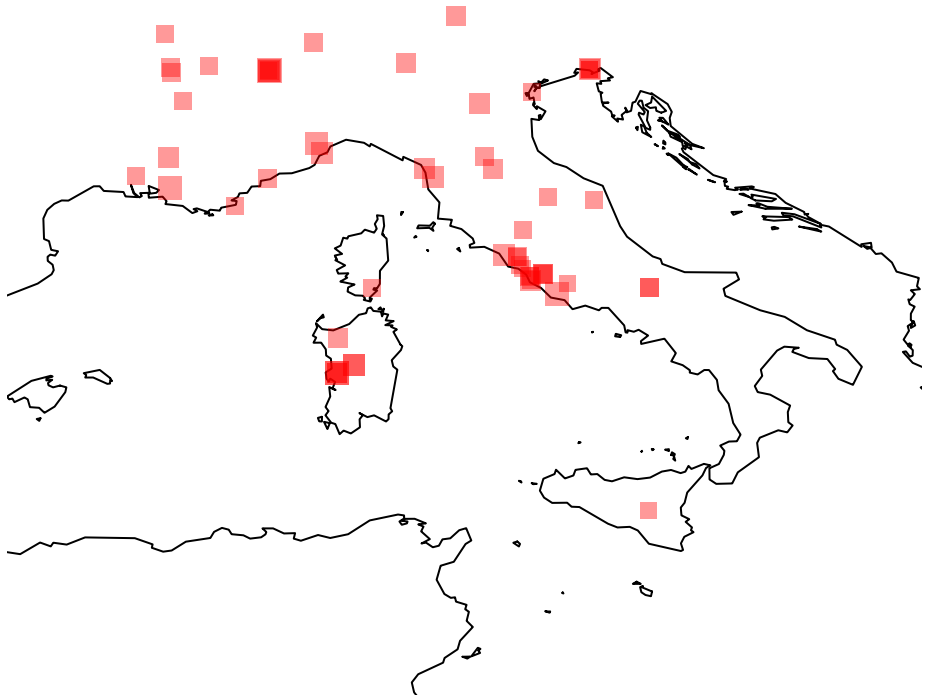



645 cal. BC

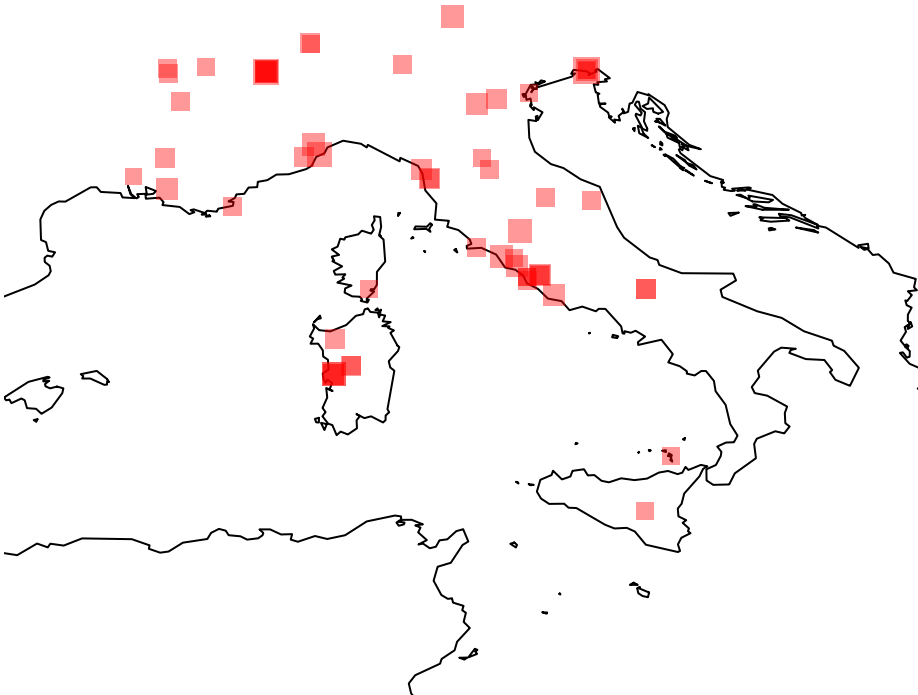

640 cal. BC

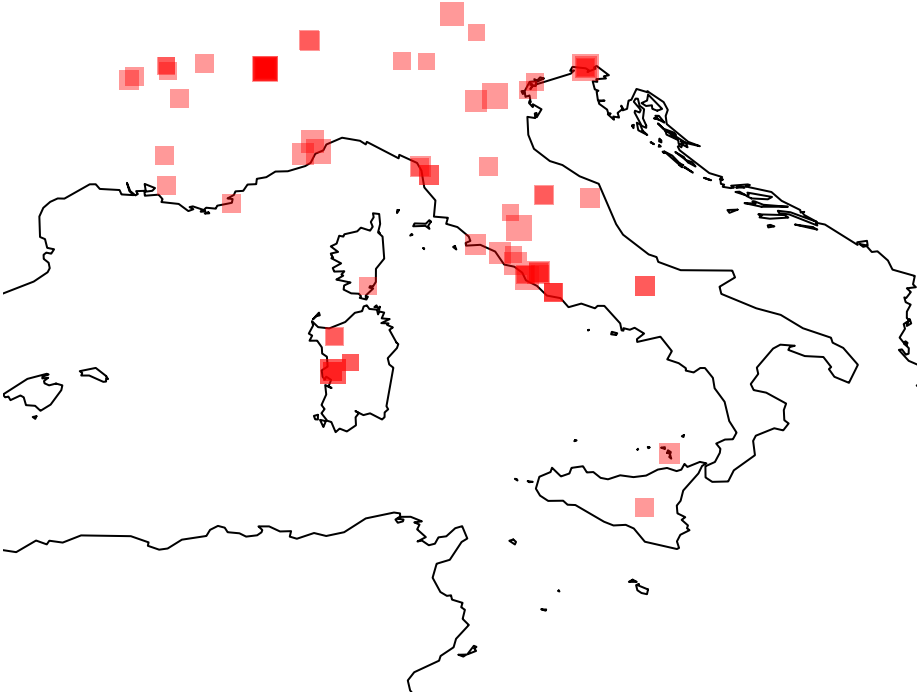

635 cal. BC

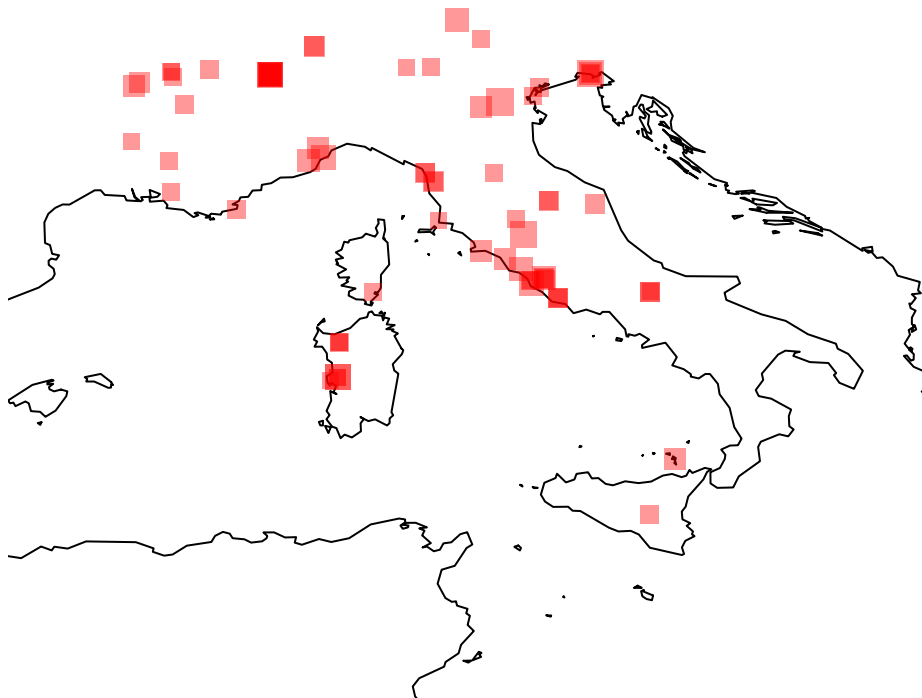





620 cal. BC

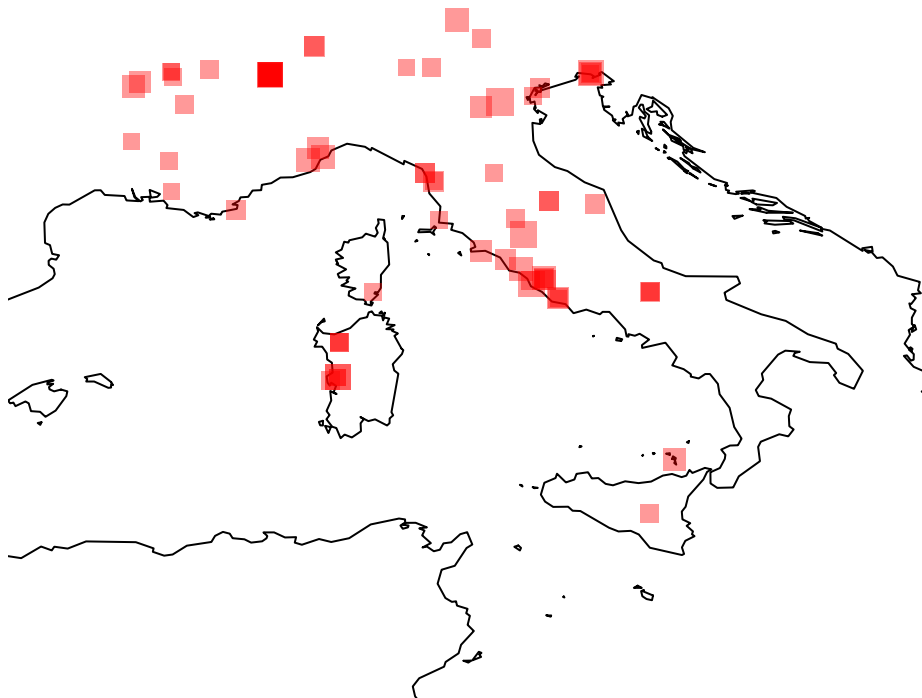

615 cal. BC

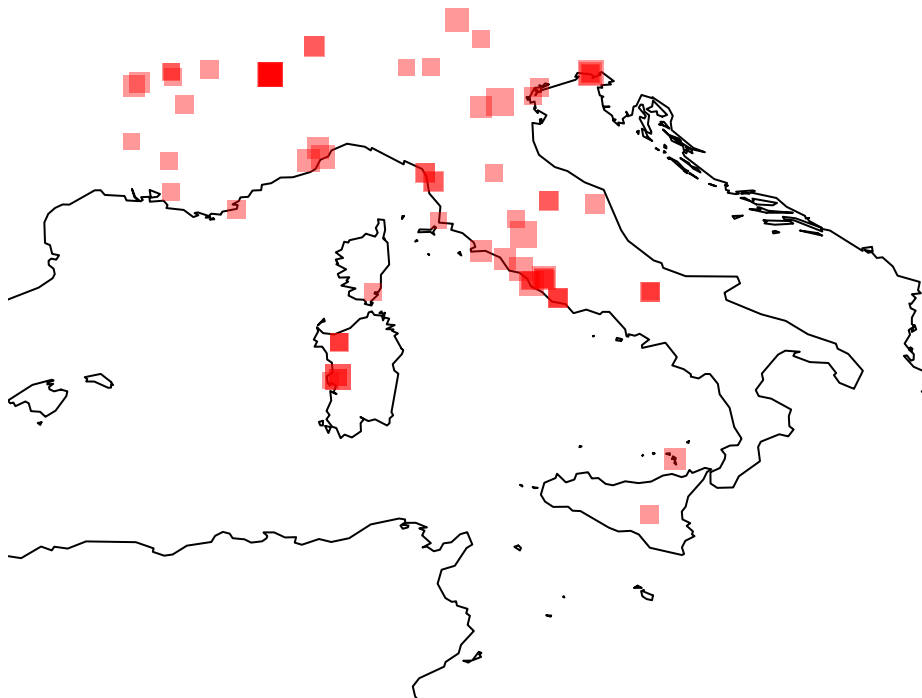

610 cal. BC

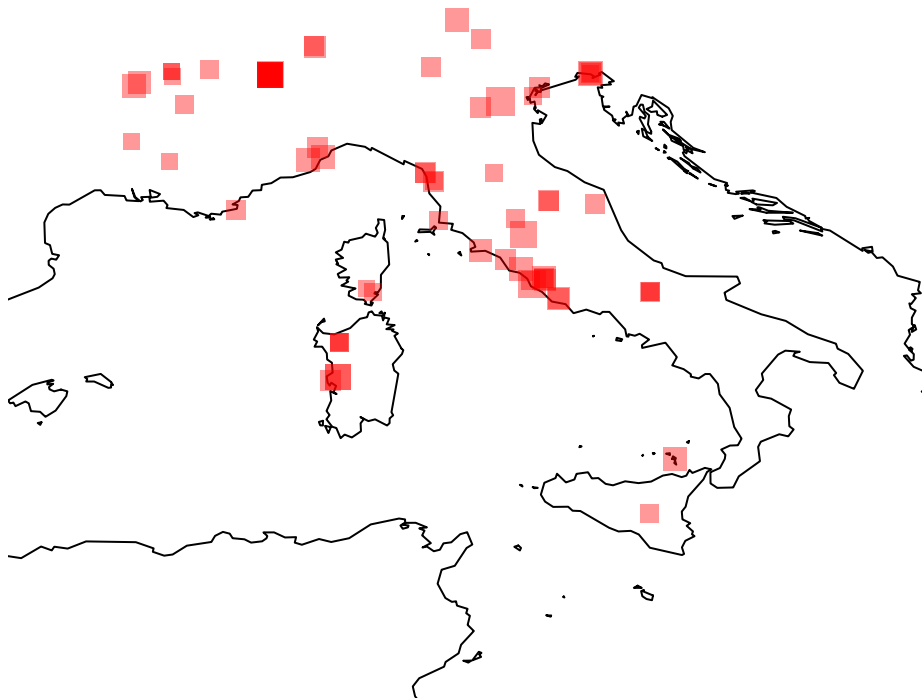



605 cal. BC

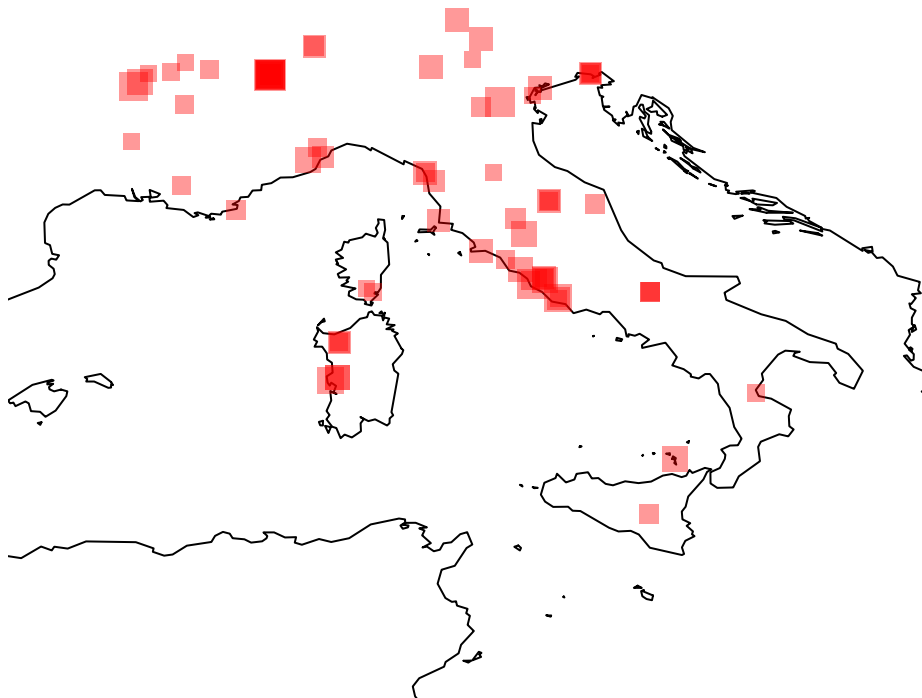

600 cal. BC

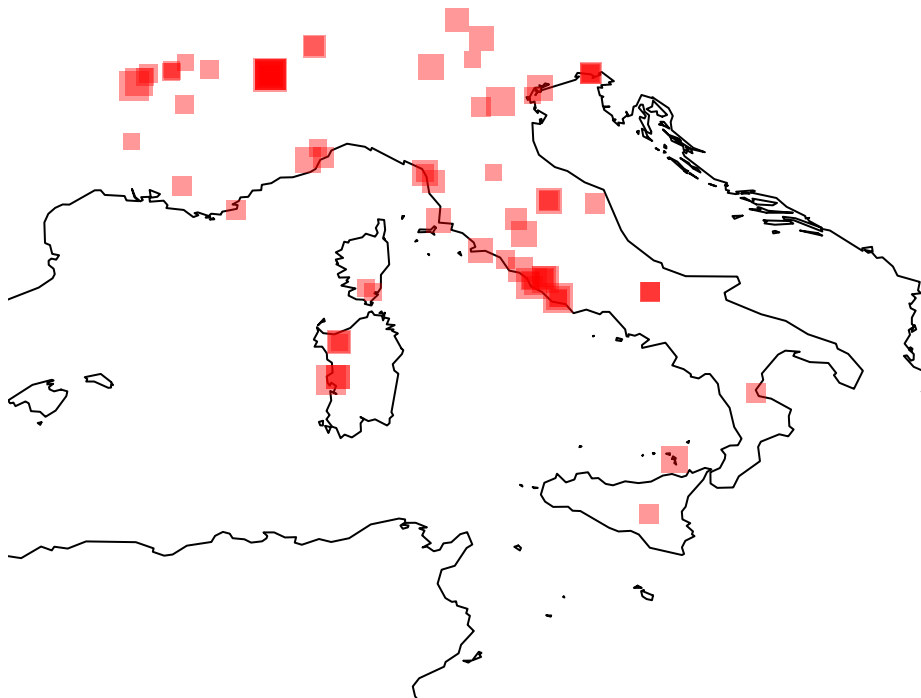

595 cal. BC

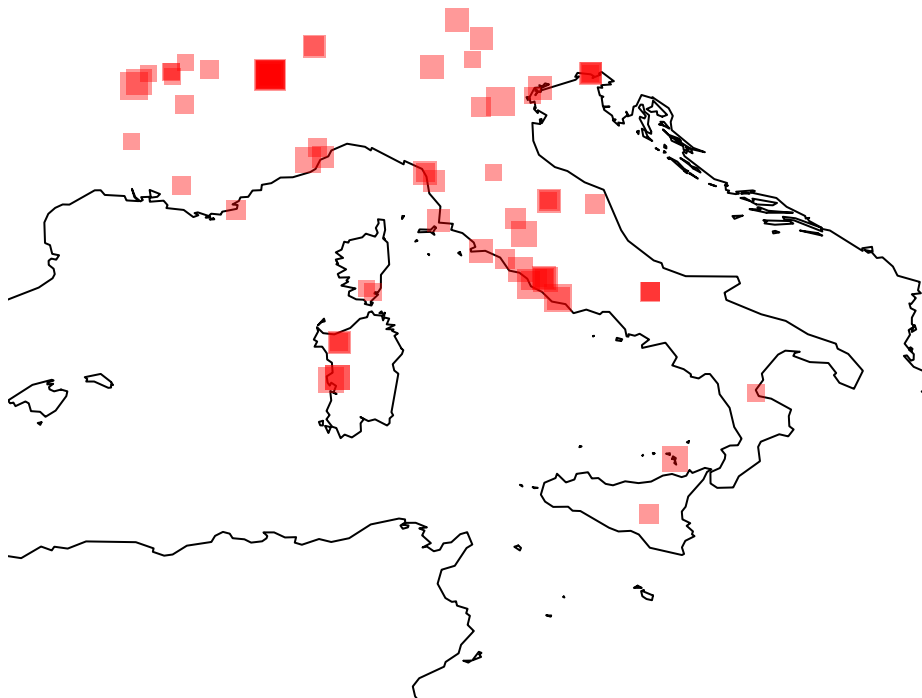

590 cal. BC

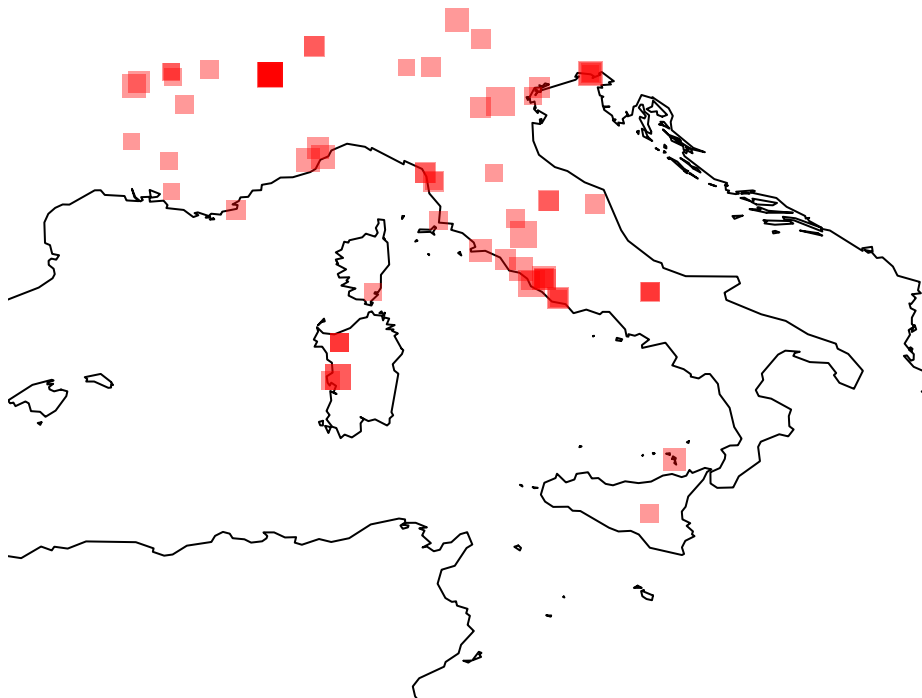

585 cal. BC

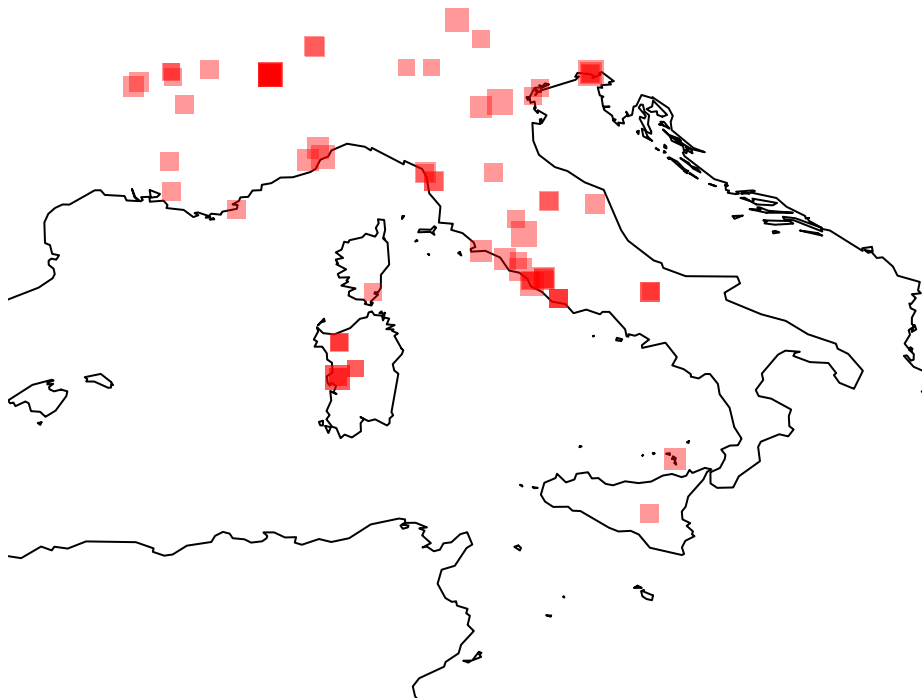

580 cal. BC

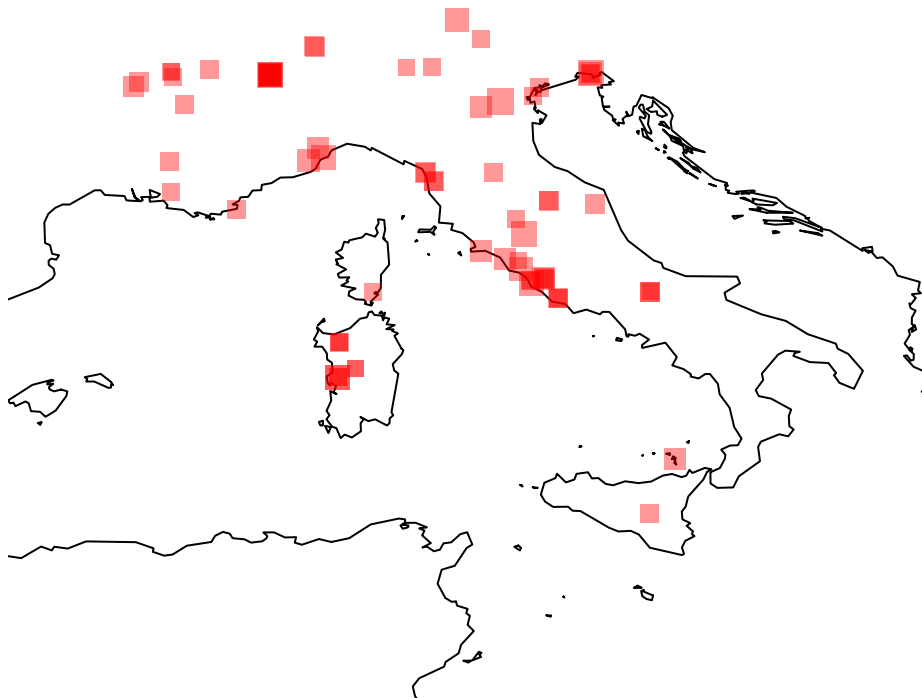

575 cal. BC

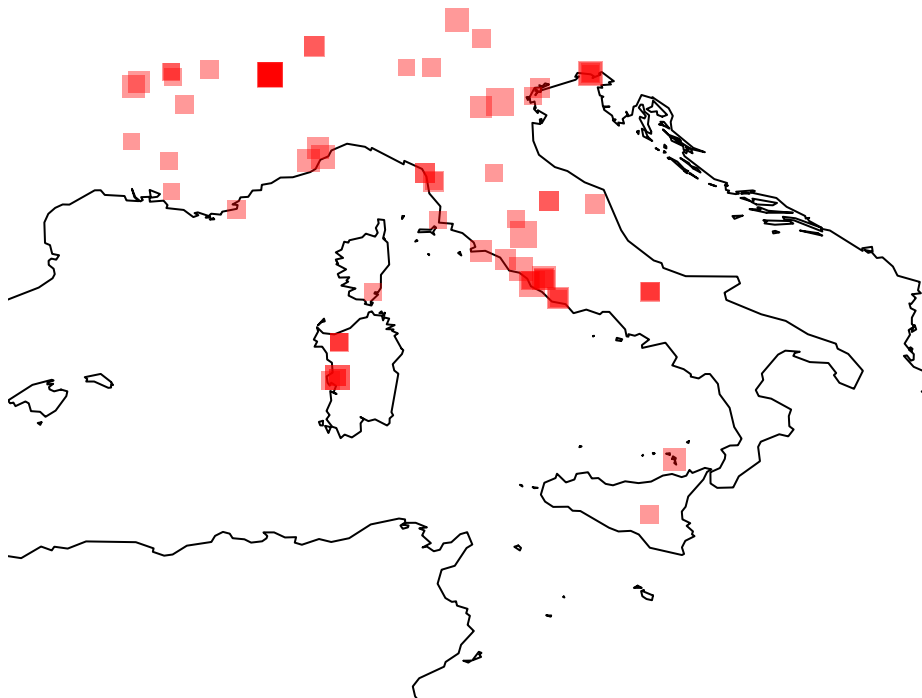

570 cal. BC

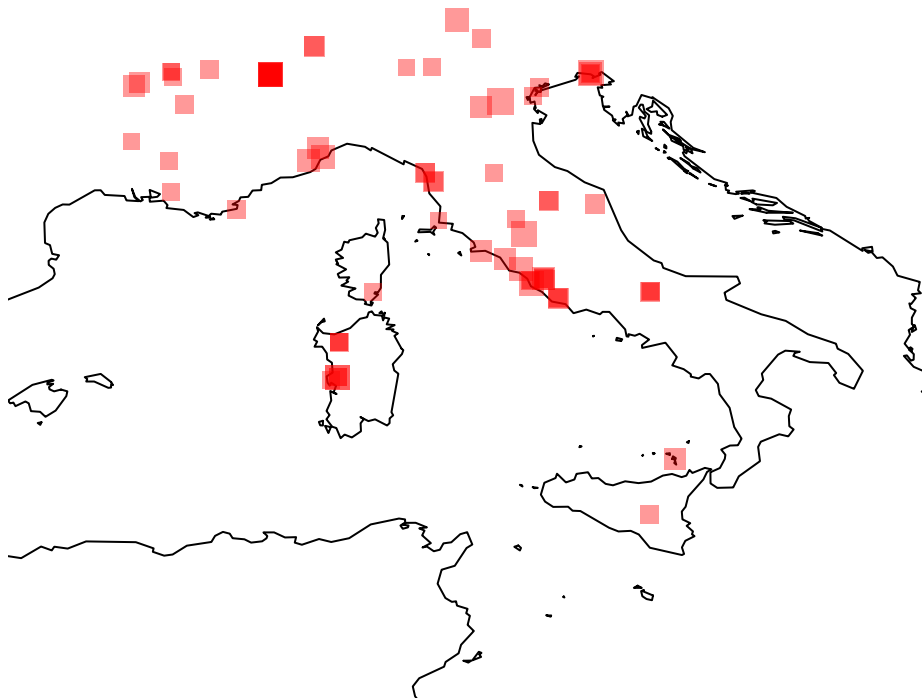



565 cal. BC

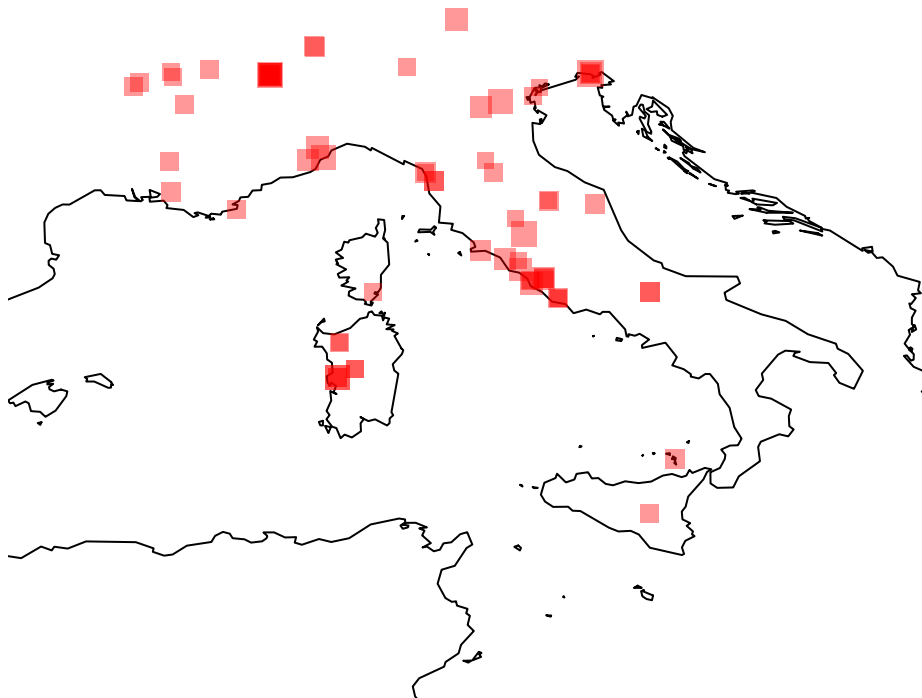

560 cal. BC

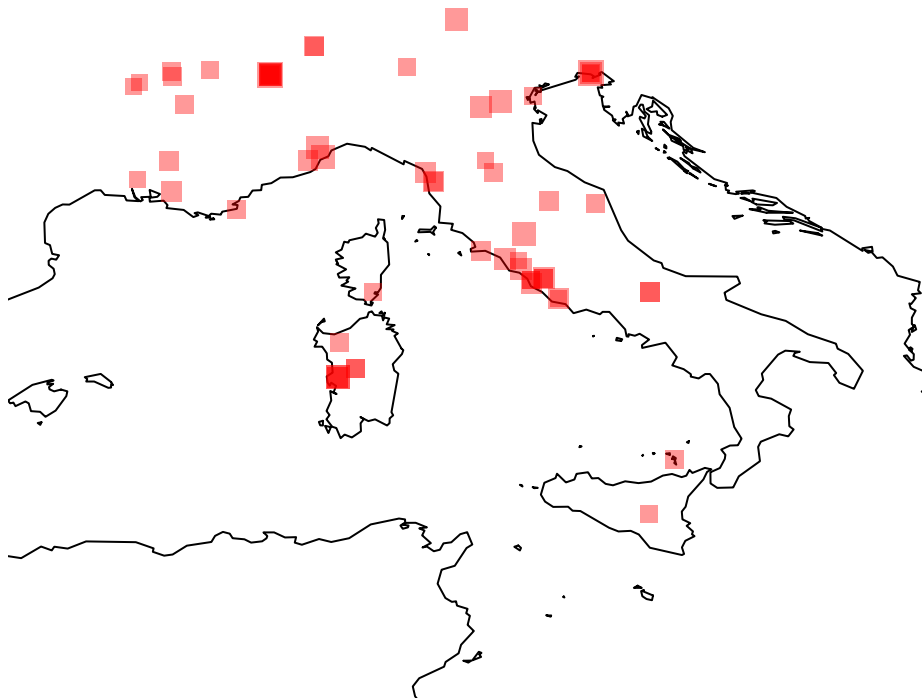

555 cal. BC

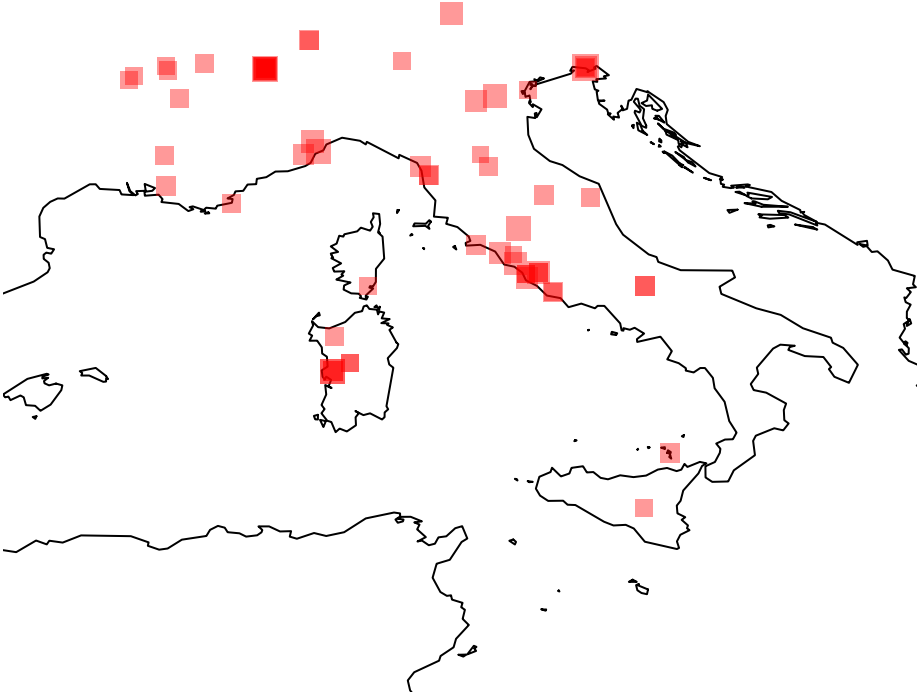



545 cal. BC

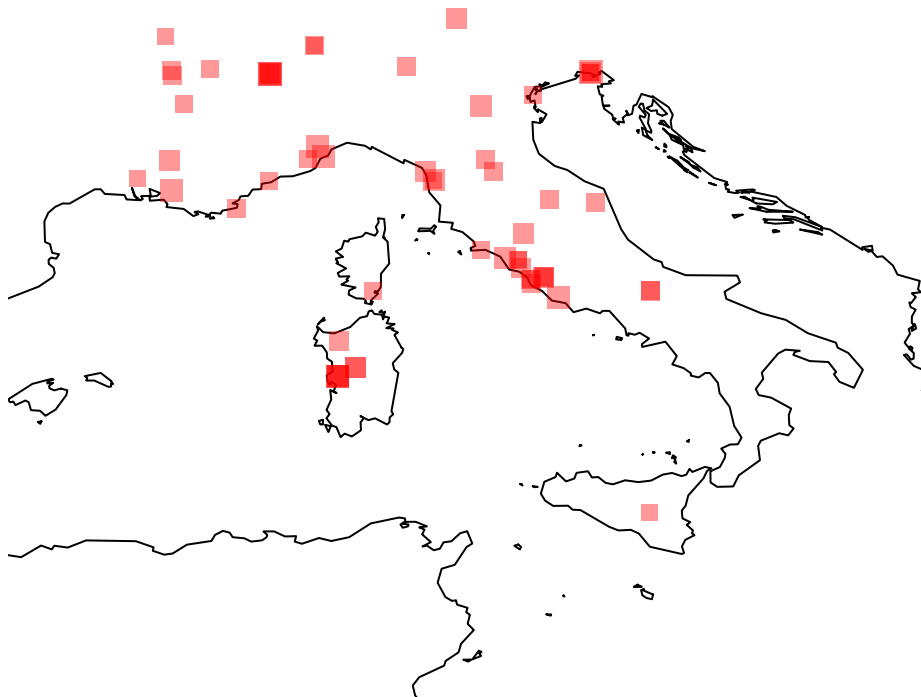

540 cal. BC

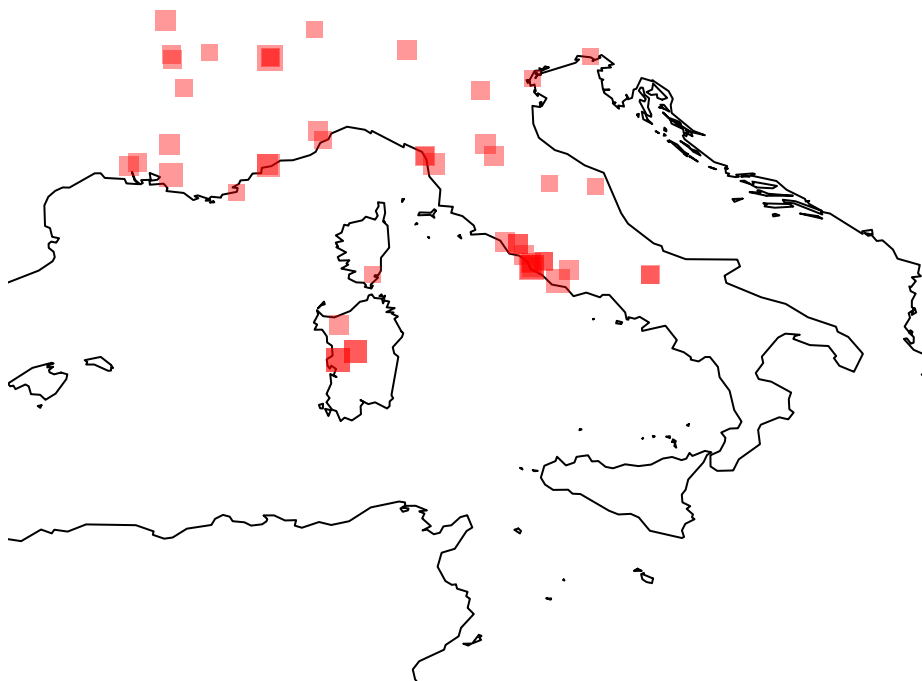

535 cal. BC

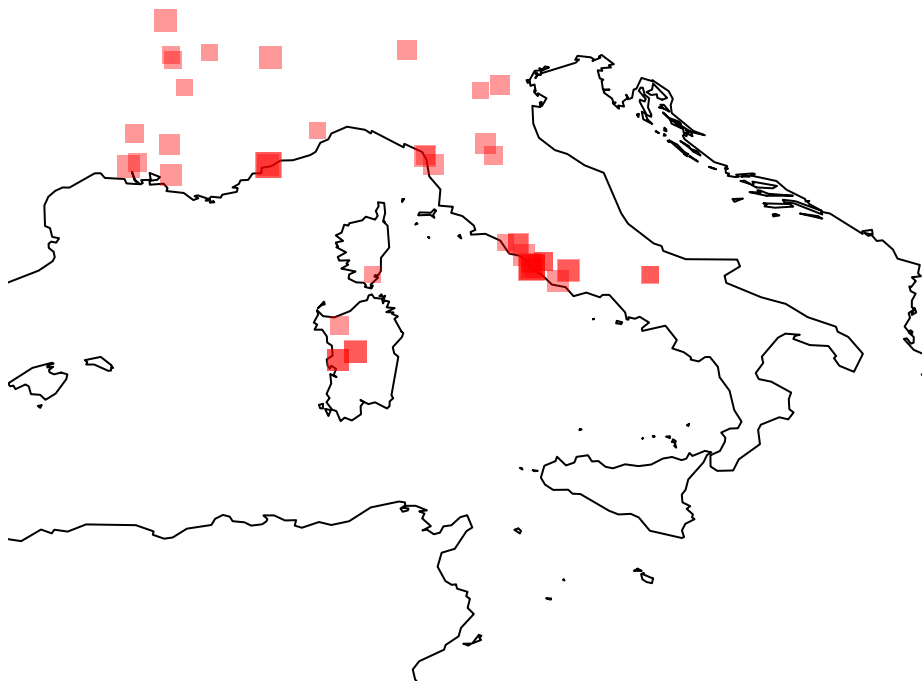

530 cal. BC

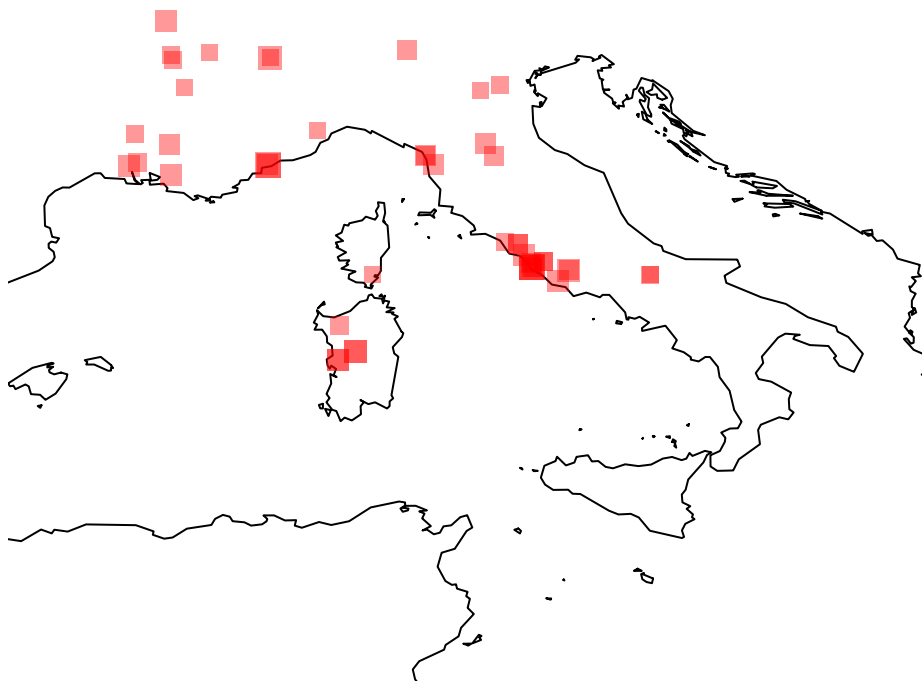





520 cal. BC

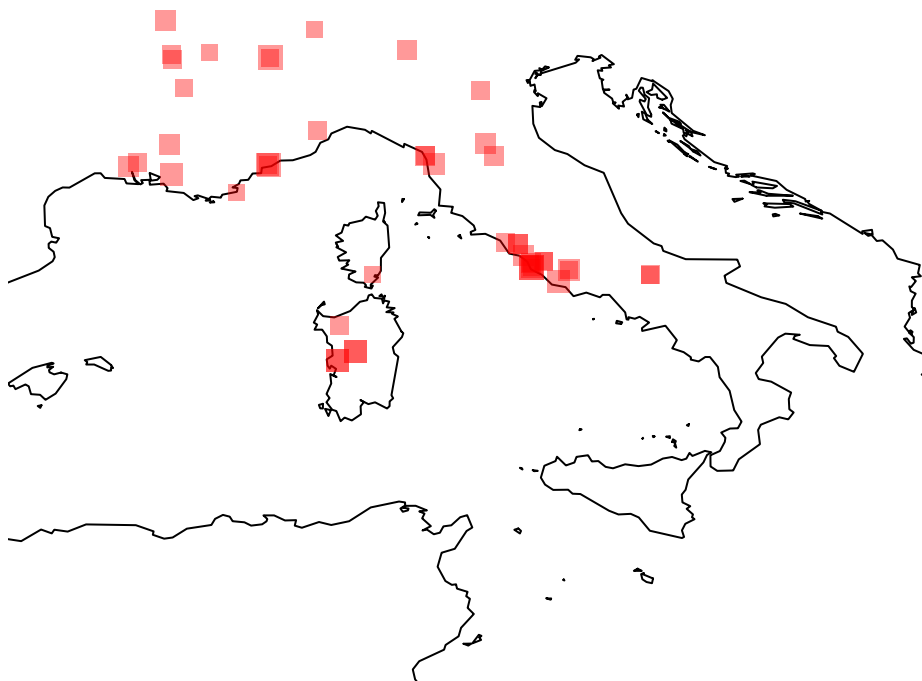

515 cal. BC

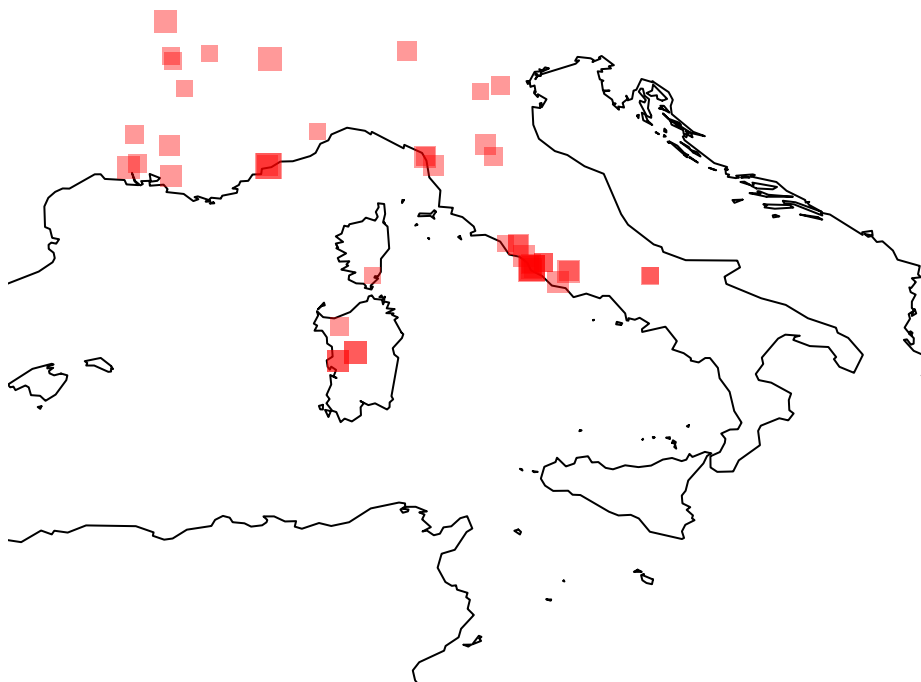

510 cal. BC

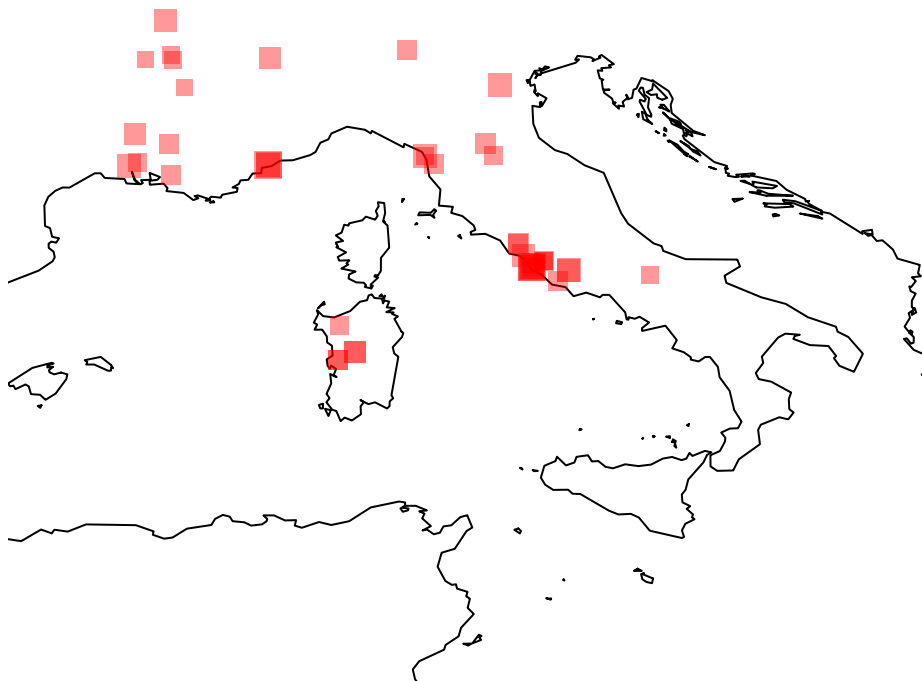

505 cal. BC

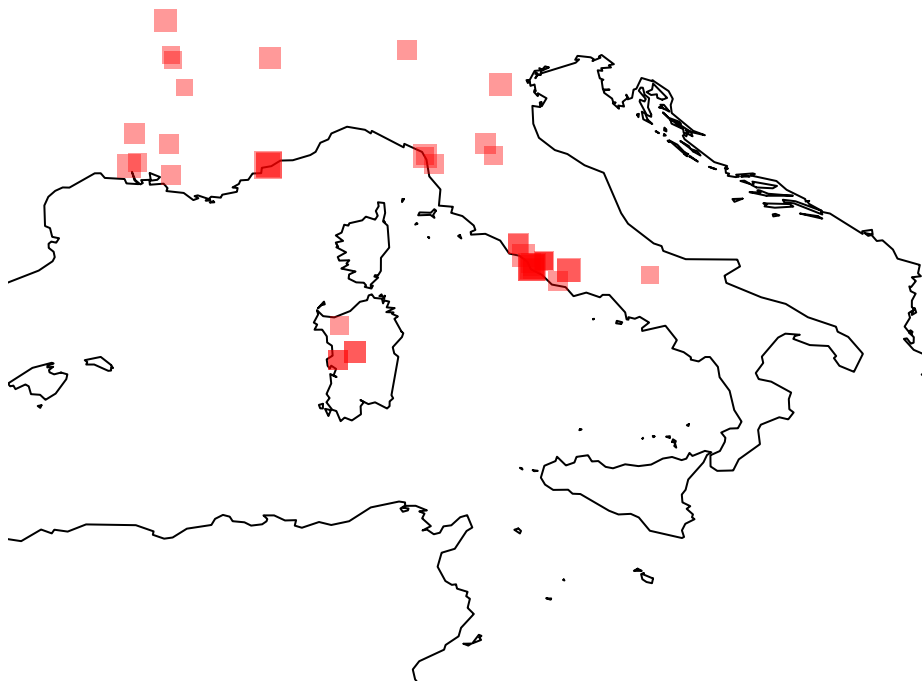

500 cal. BC

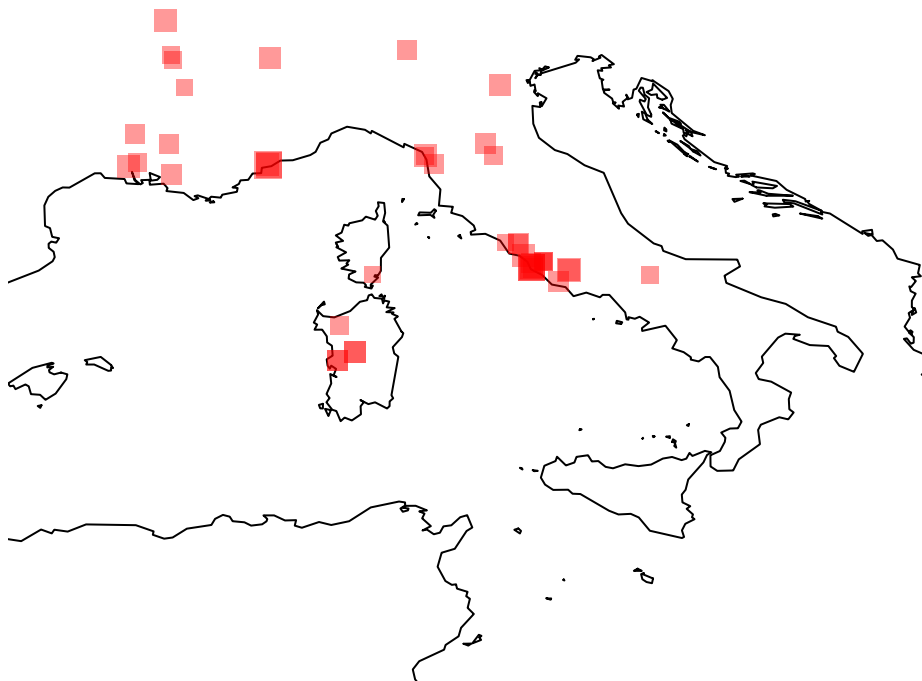

495 cal. BC

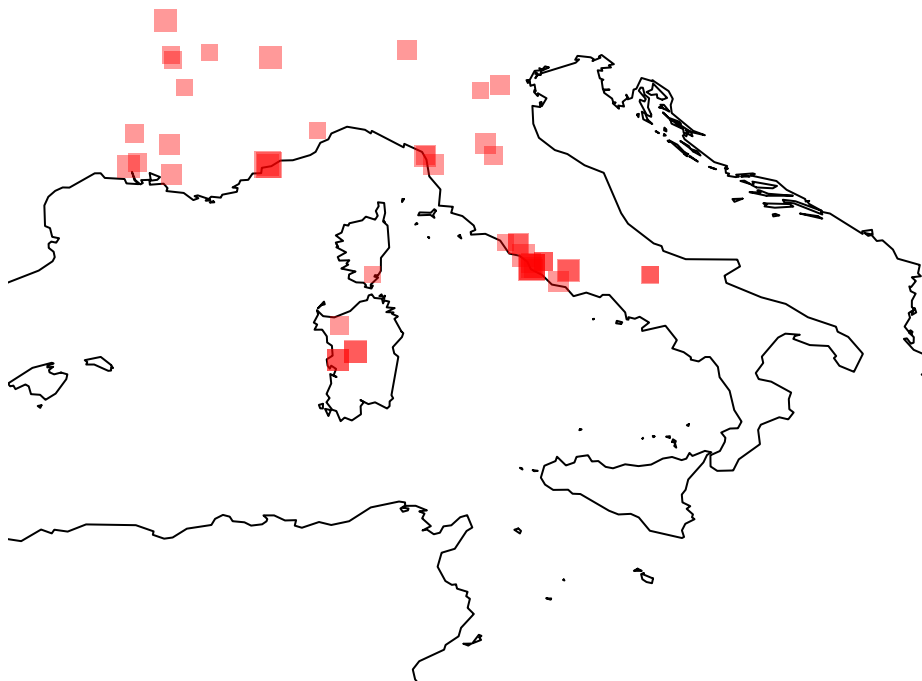

490 cal. BC

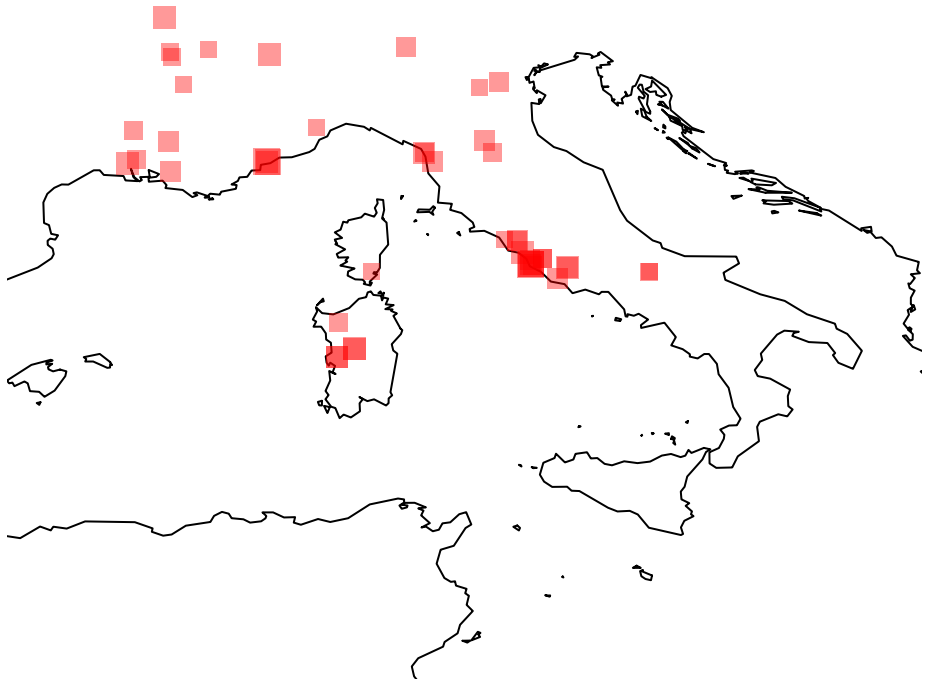



485 cal. BC

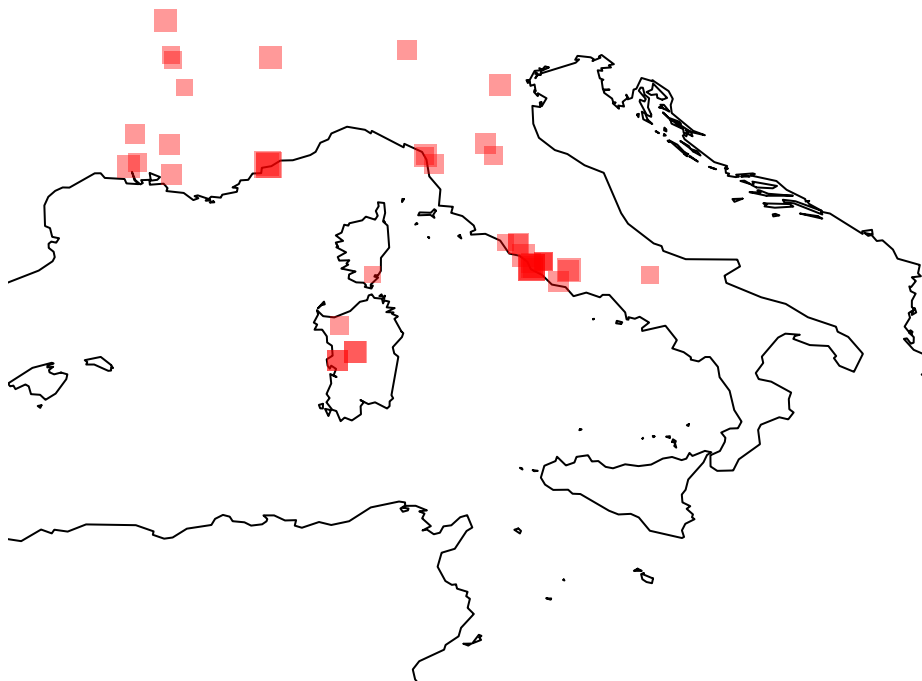



**475 cal. BC**

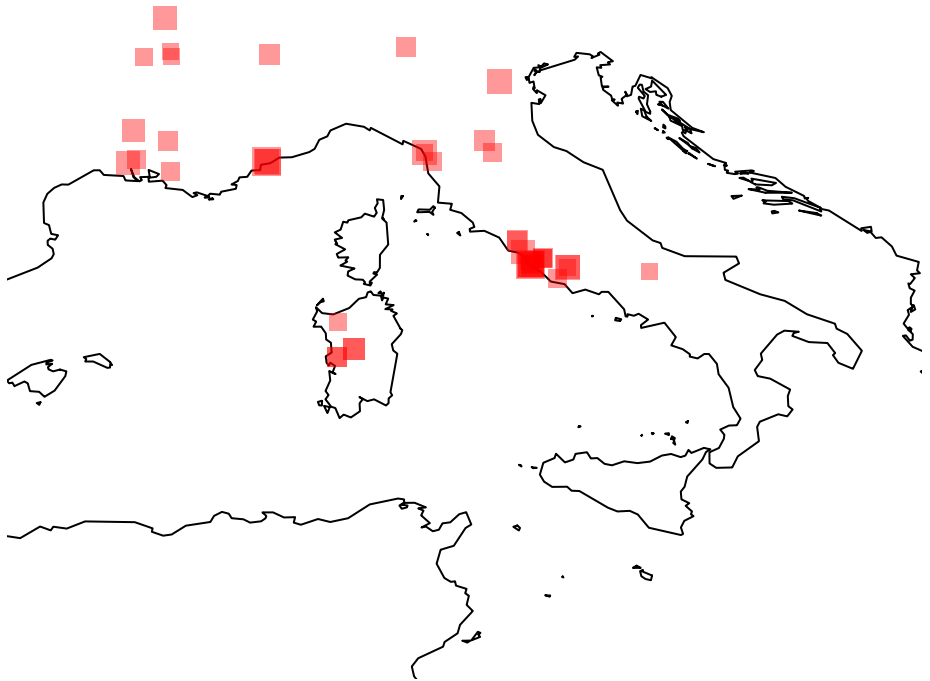

470 cal. BC

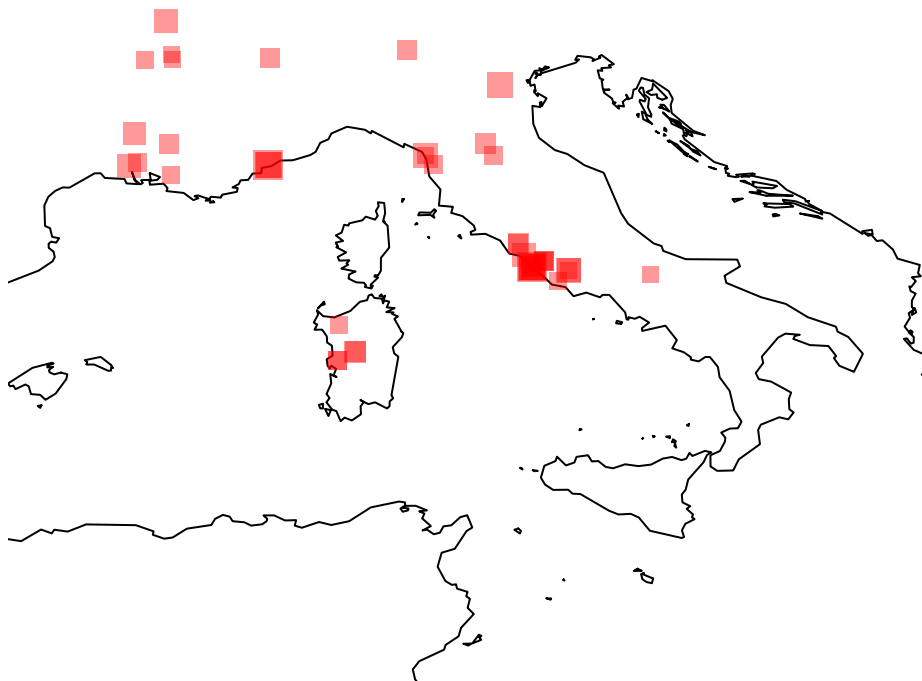

465 cal. BC



**460 cal. BC**

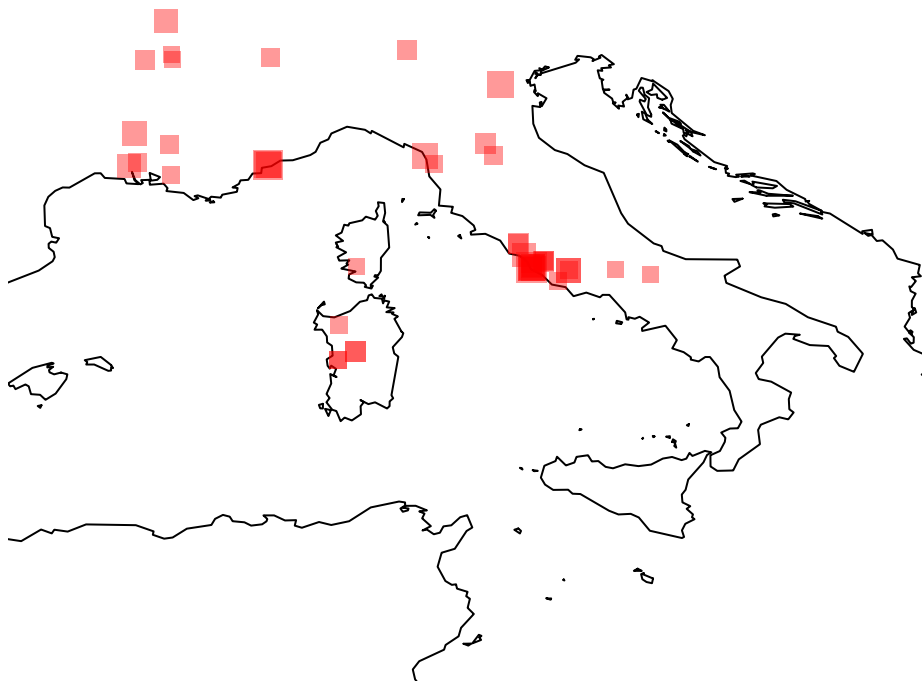



450 cal. BC

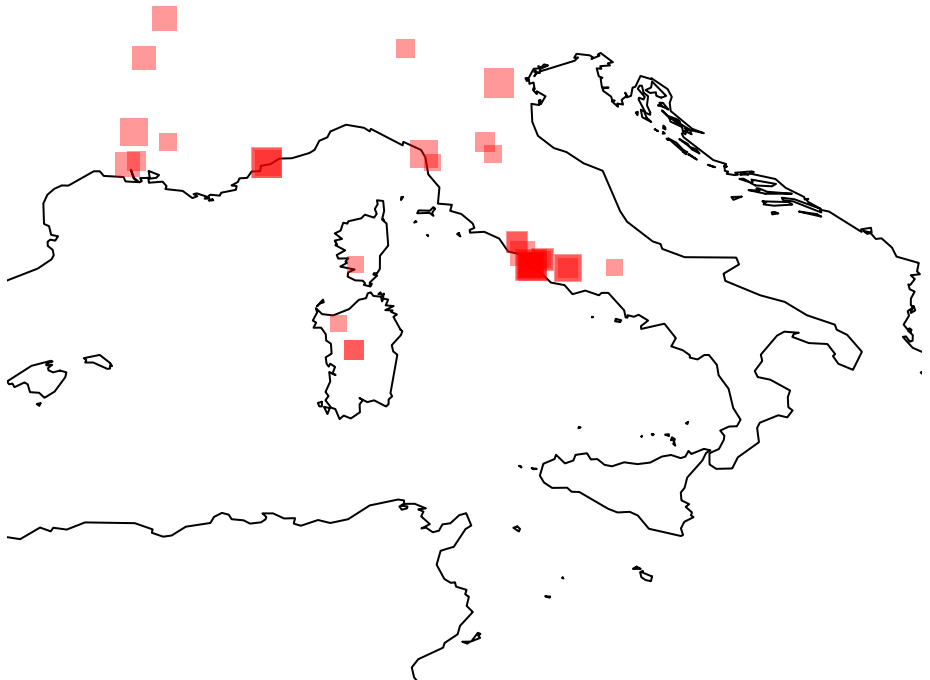



445 cal. BC





435 cal. BC

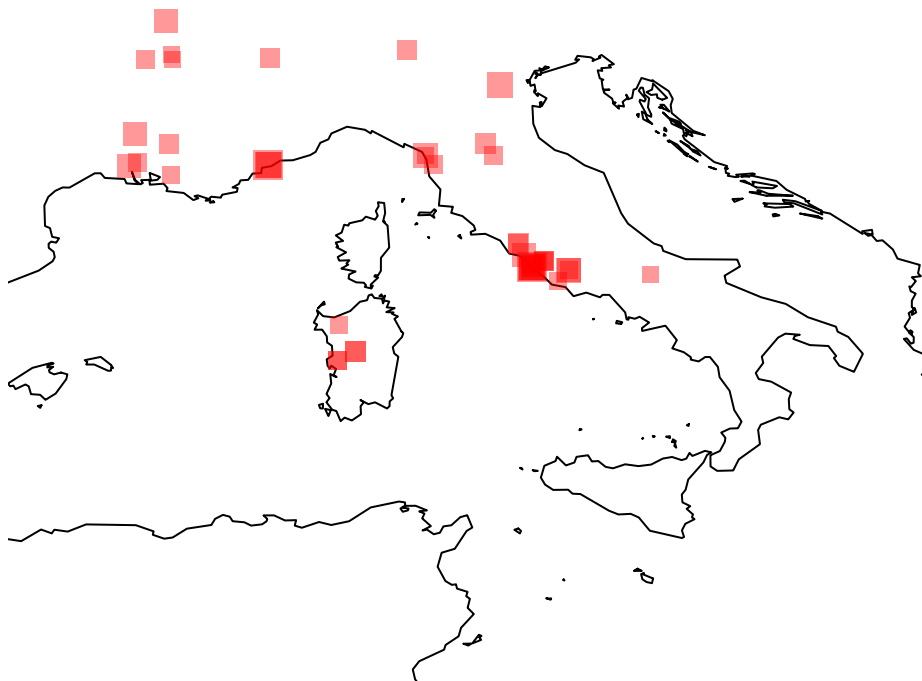



425 cal. BC

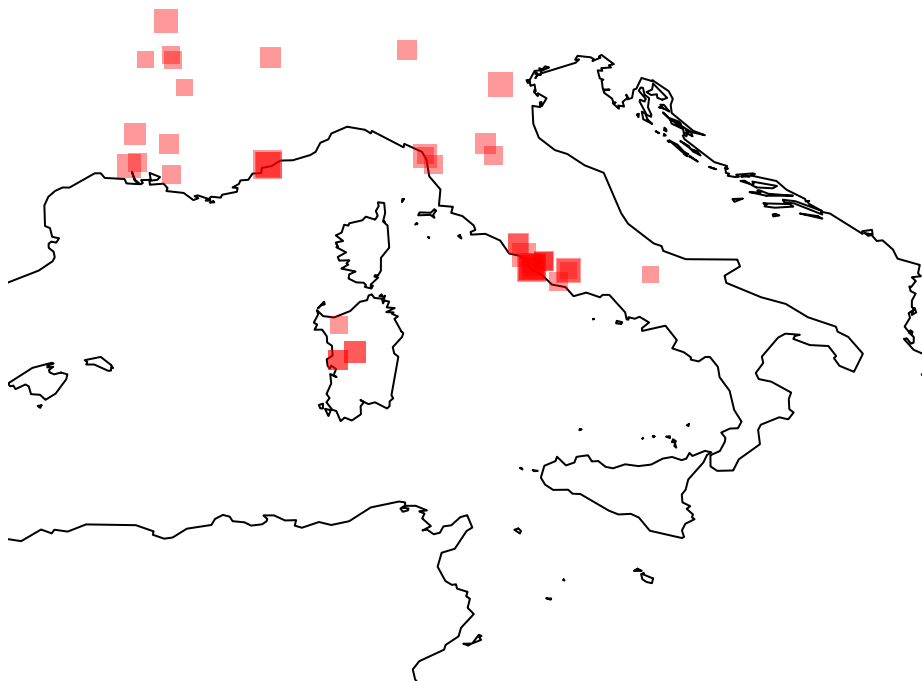

420 cal. BC

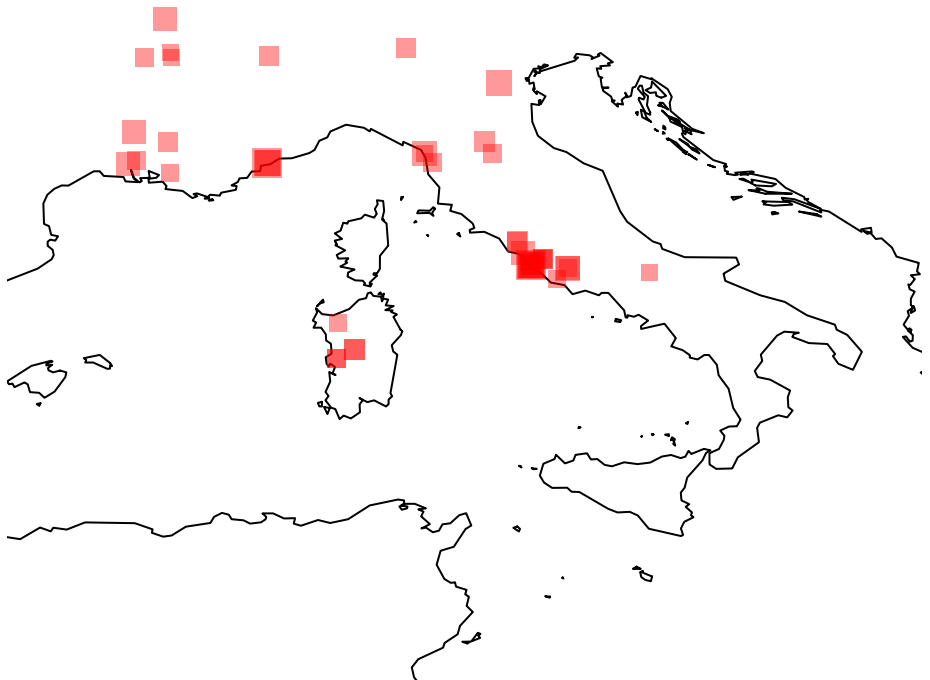







405 cal. BC

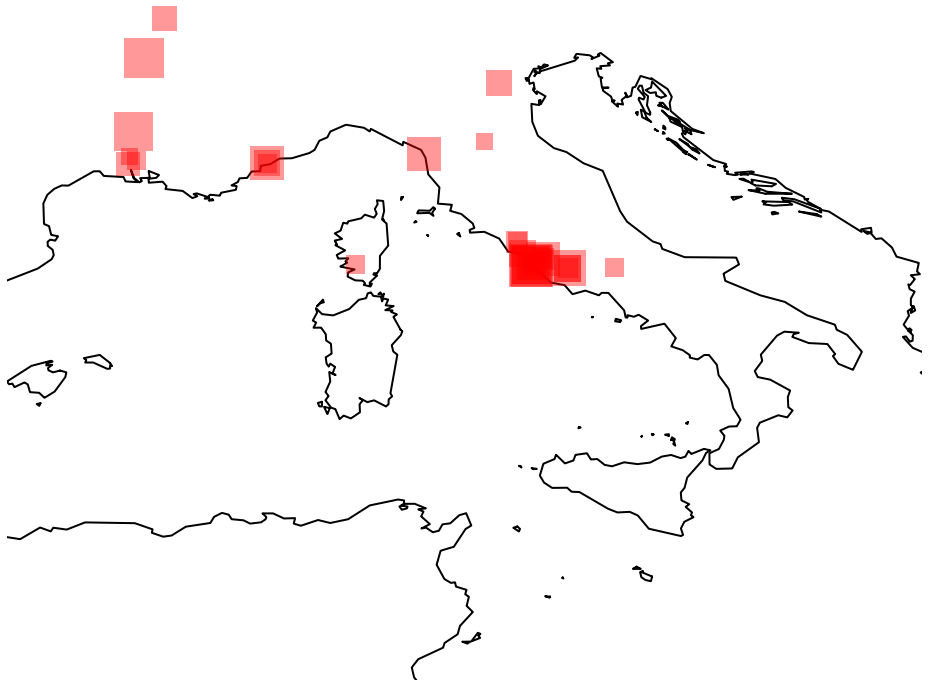

400 cal. BC

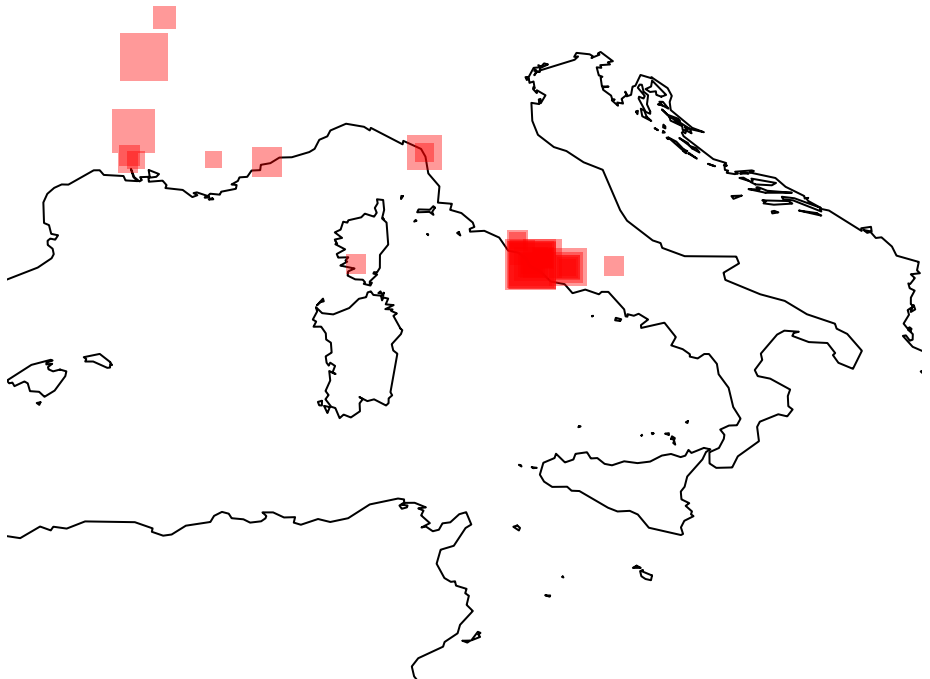

395 cal. BC

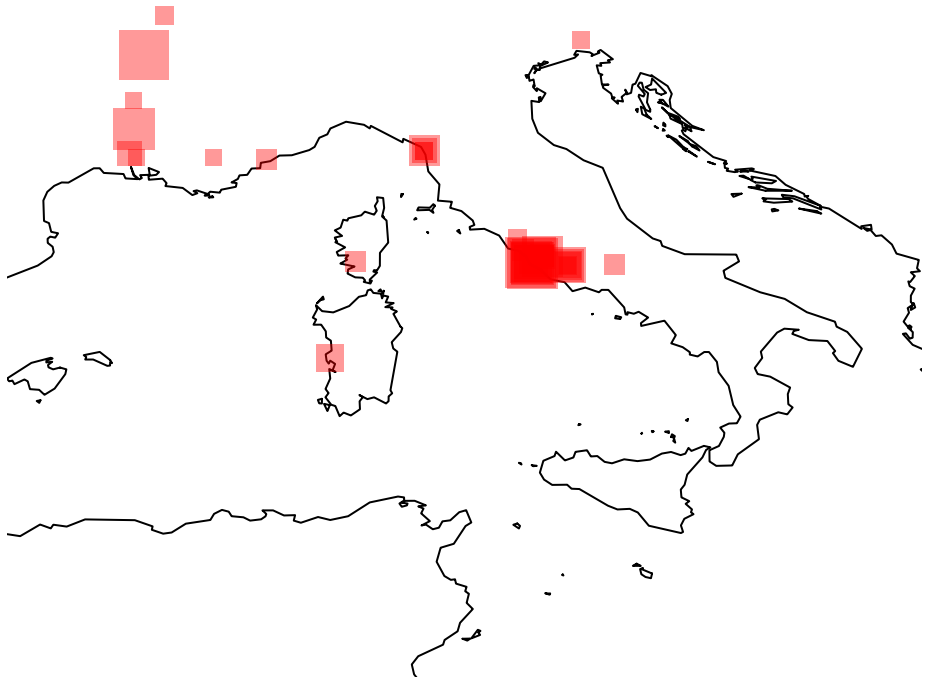

390 cal. BC

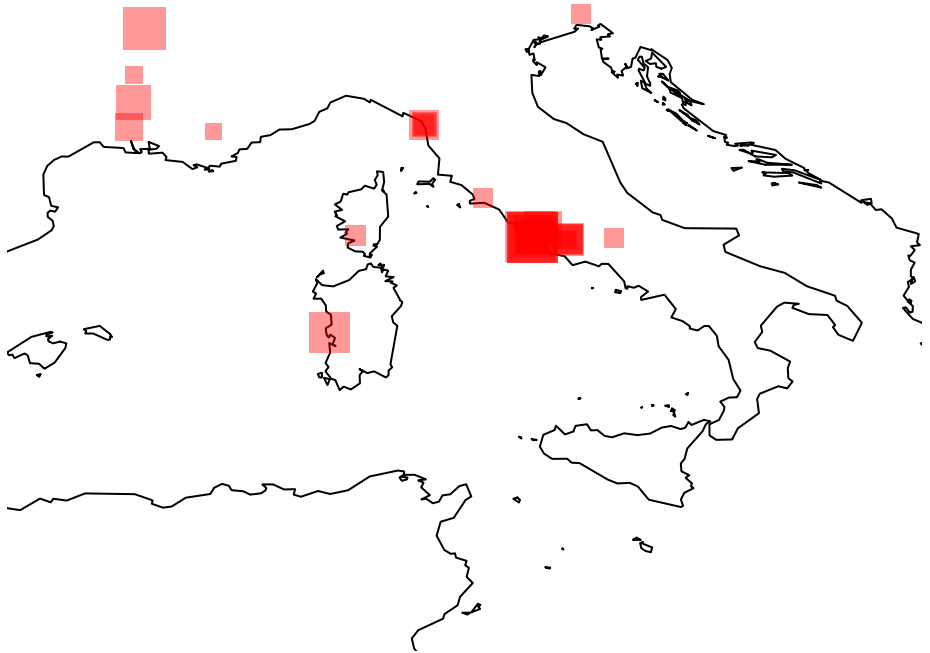



380 cal. BC

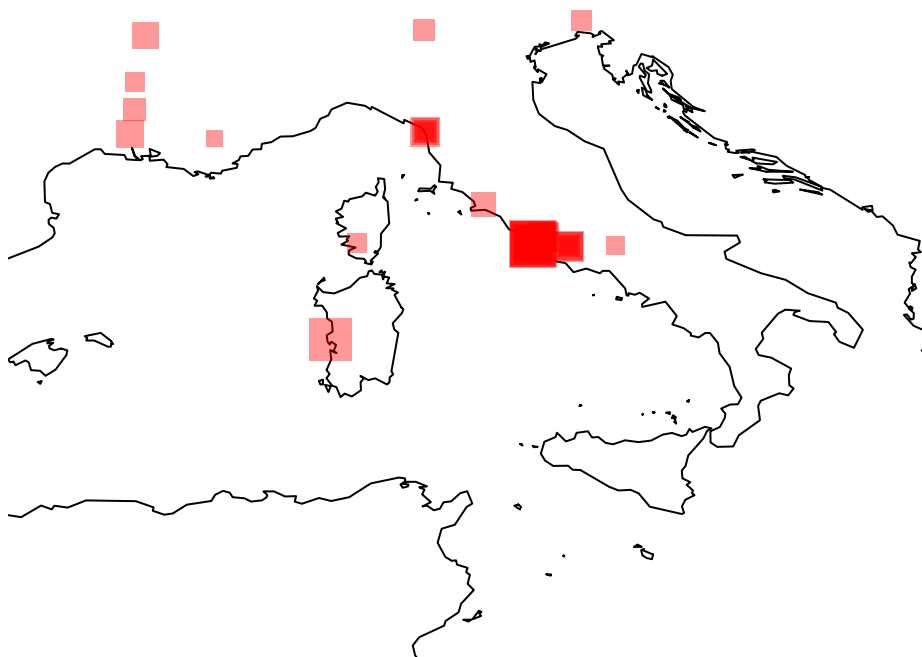

**375 cal. BC**

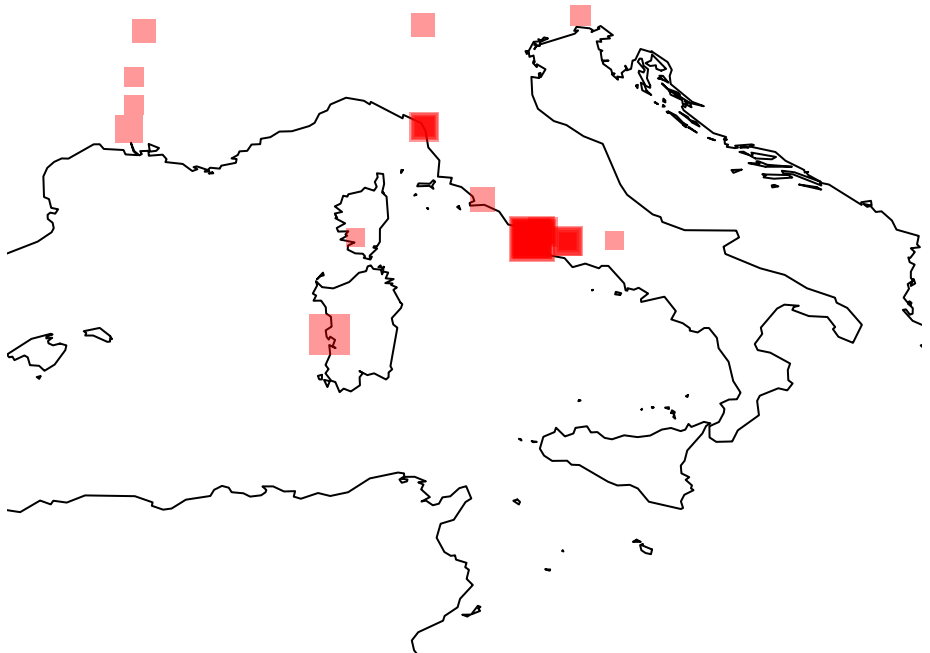

370 cal. BC

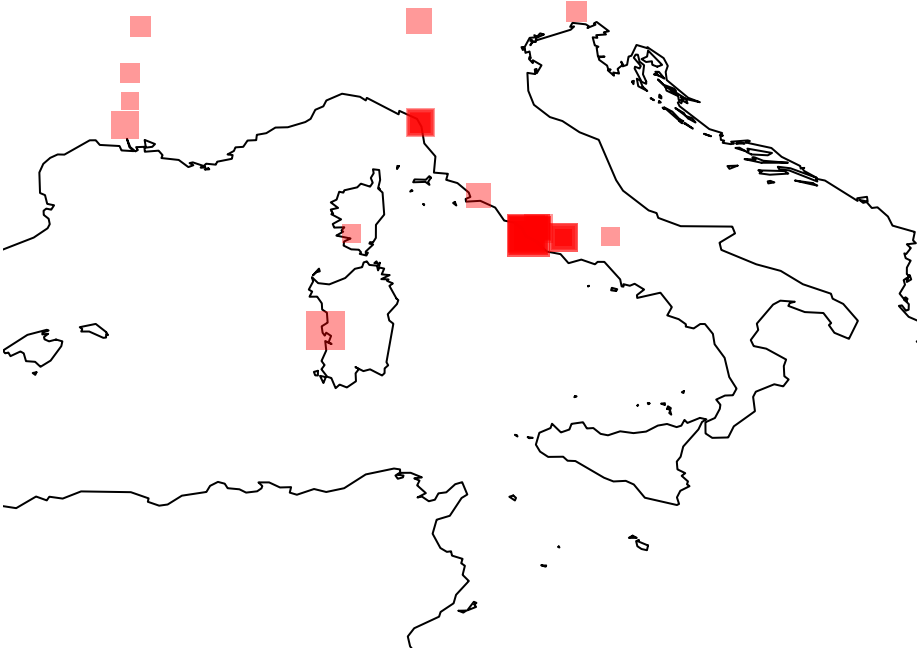





360 cal. BC

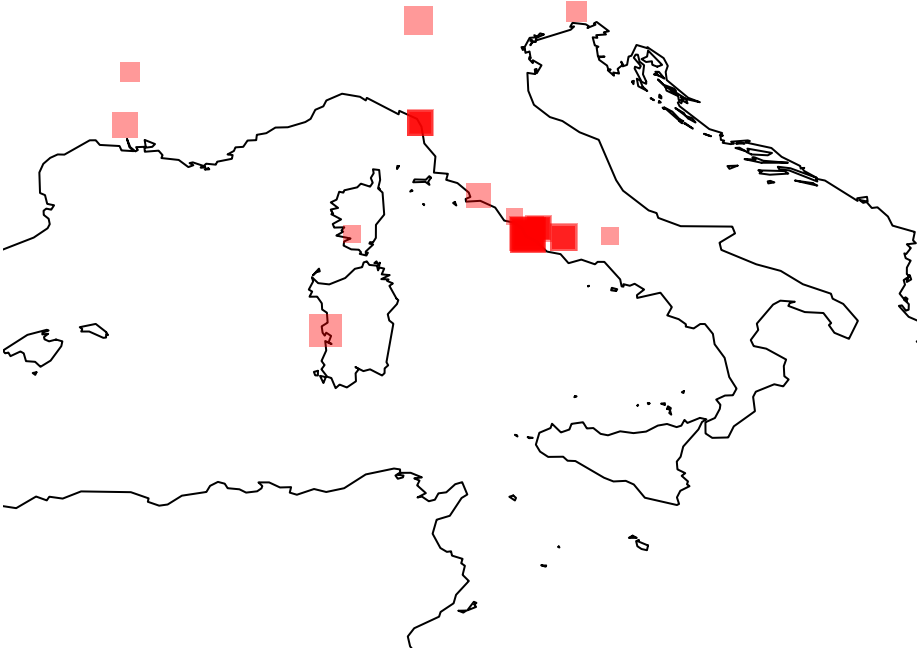

355 cal. BC

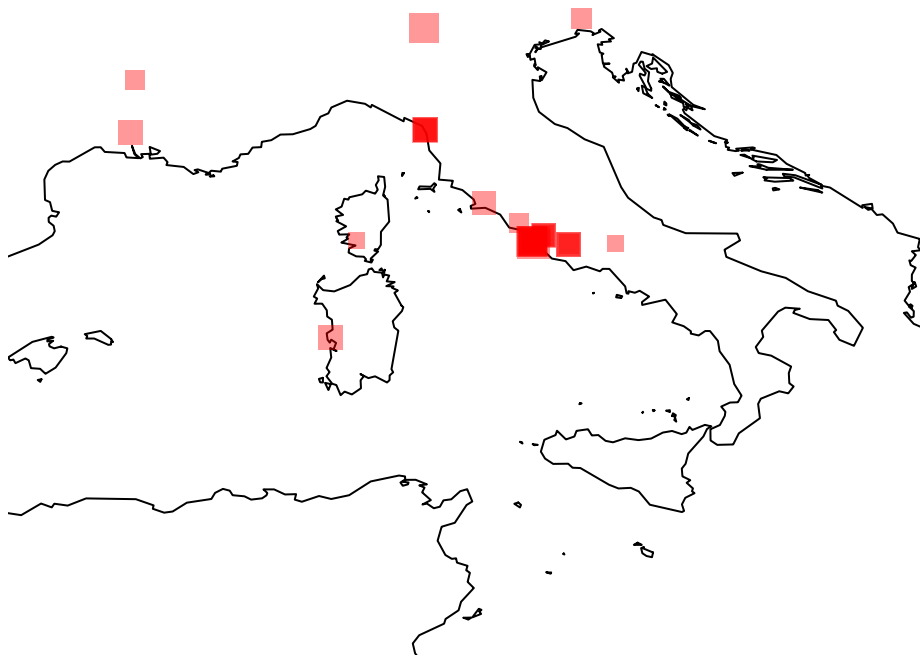





340 cal. BC

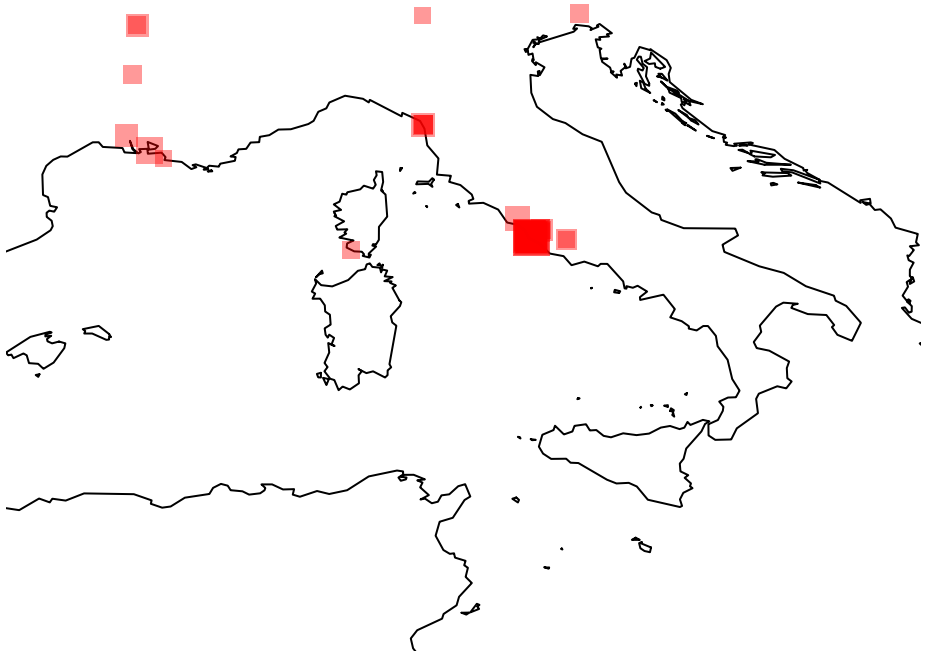

335 cal. BC

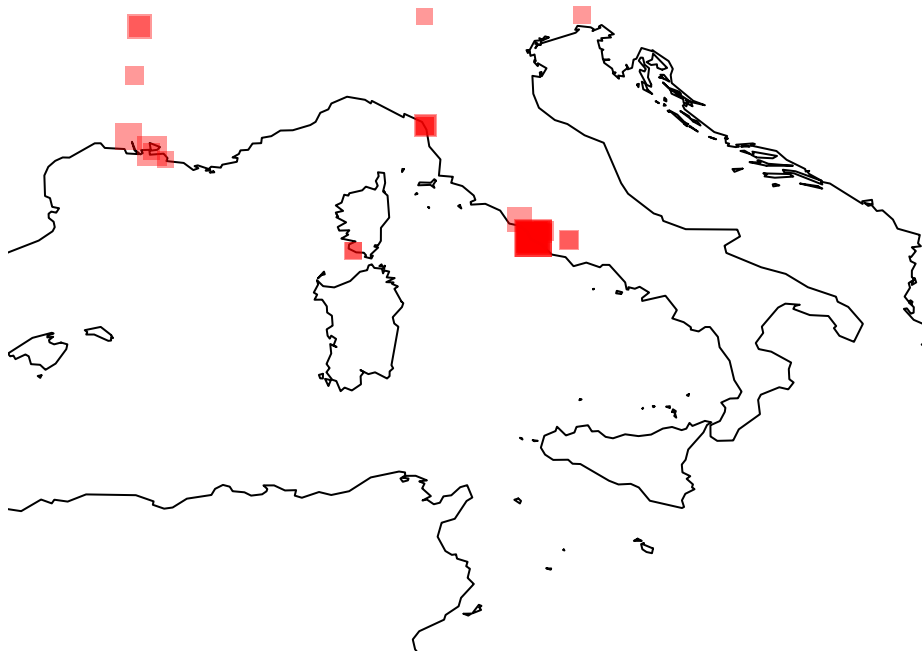

330 cal. BC

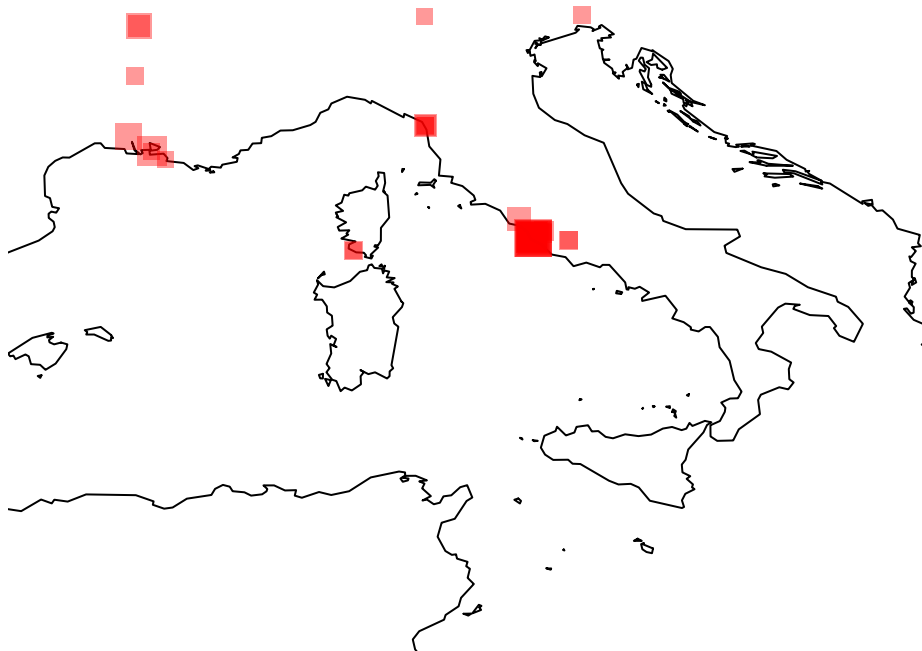



325 cal. BC

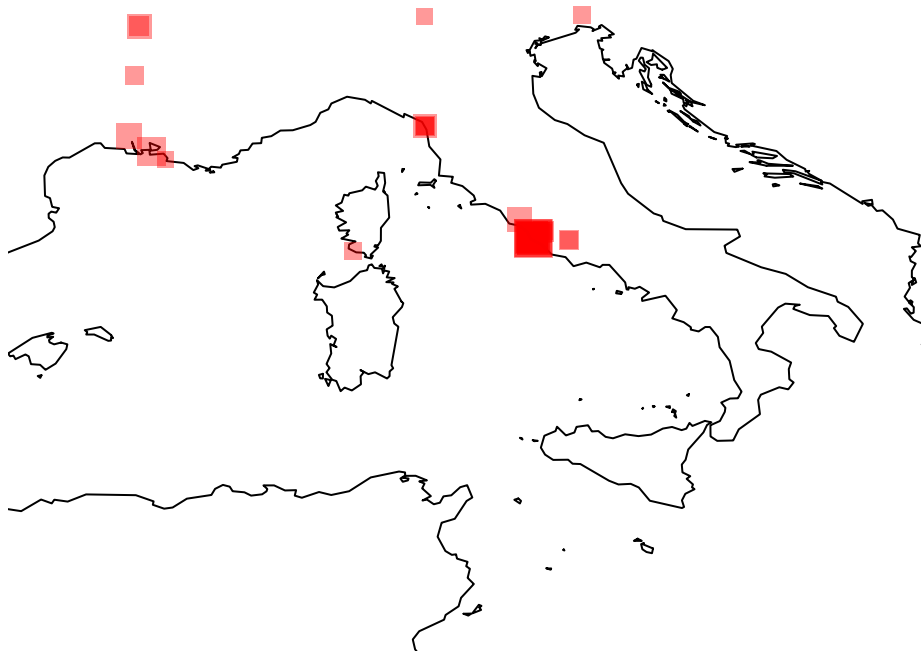

320 cal. BC

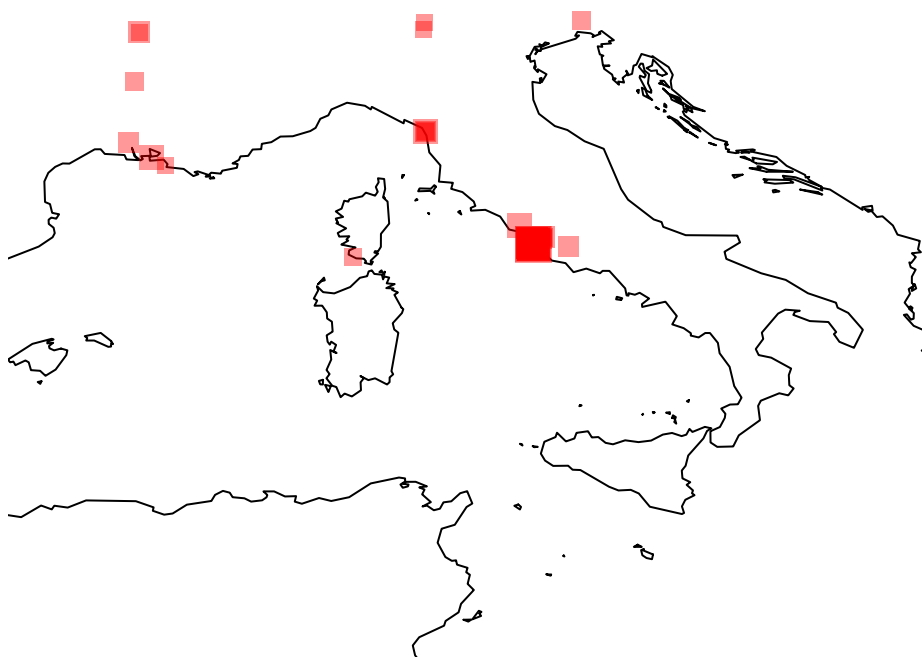

315 cal. BC

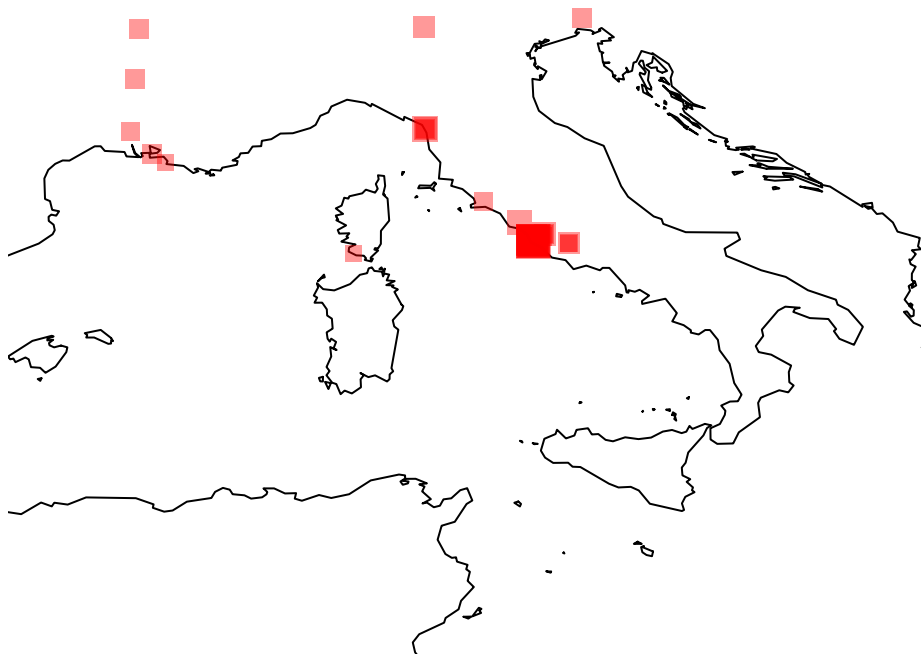

310 cal. BC

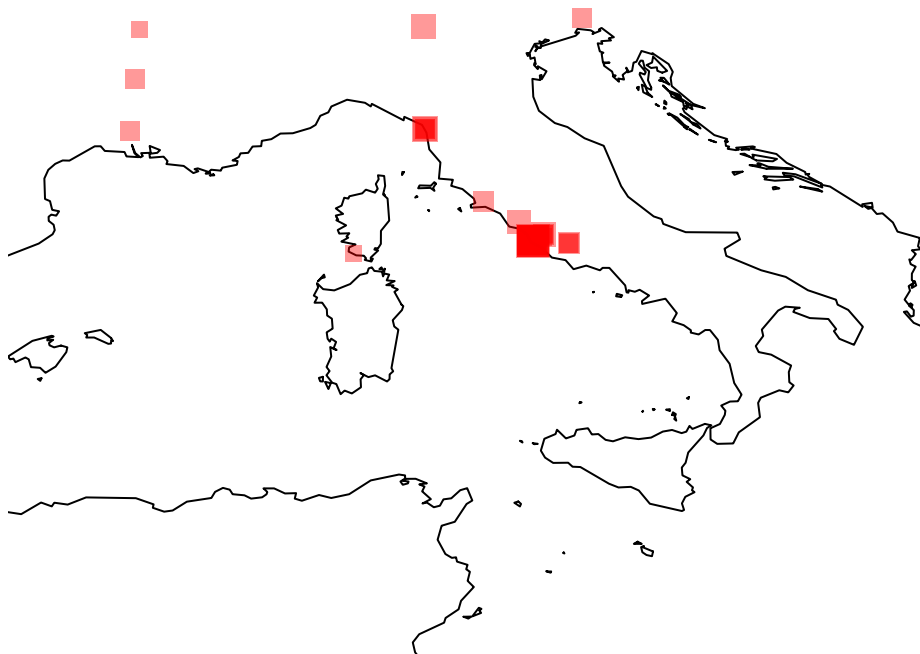

305 cal. BC

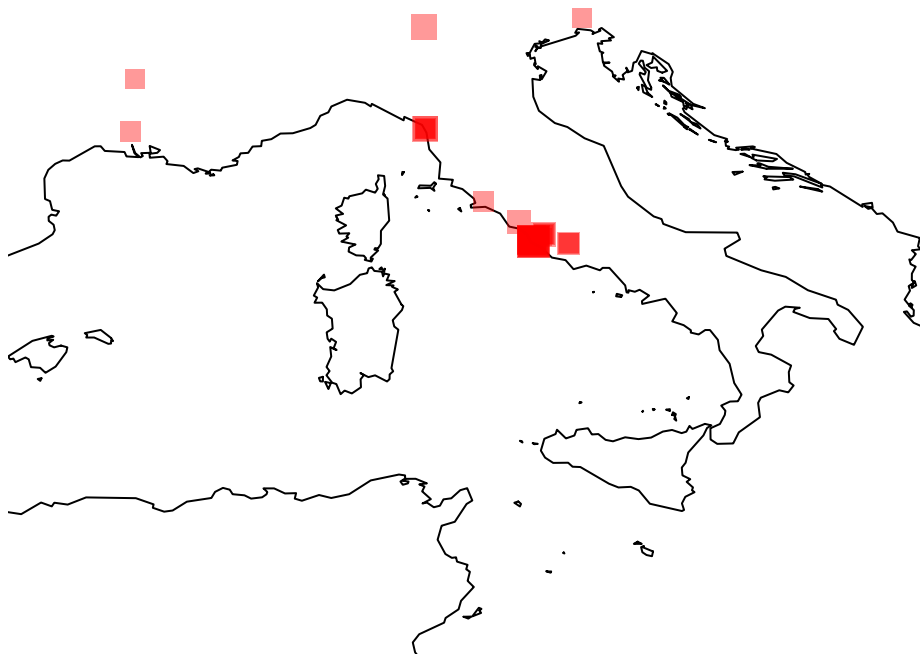

300 cal. BC

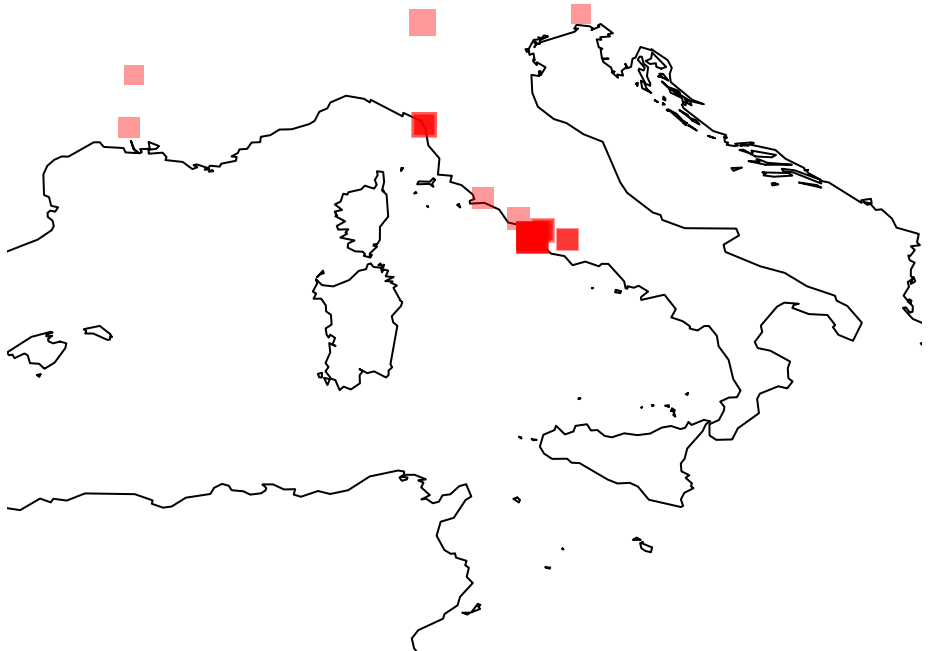



290 cal. BC

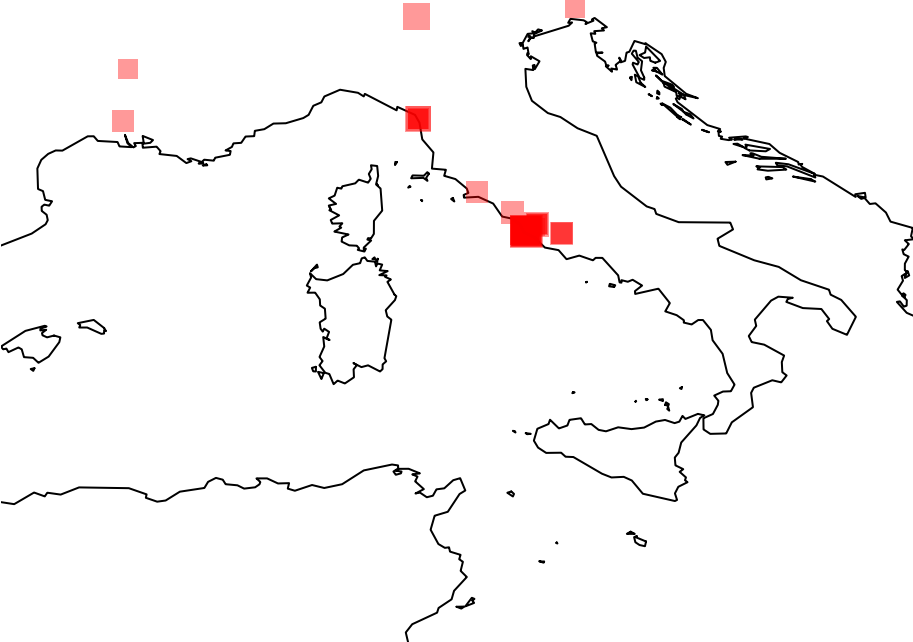



285 cal. BC

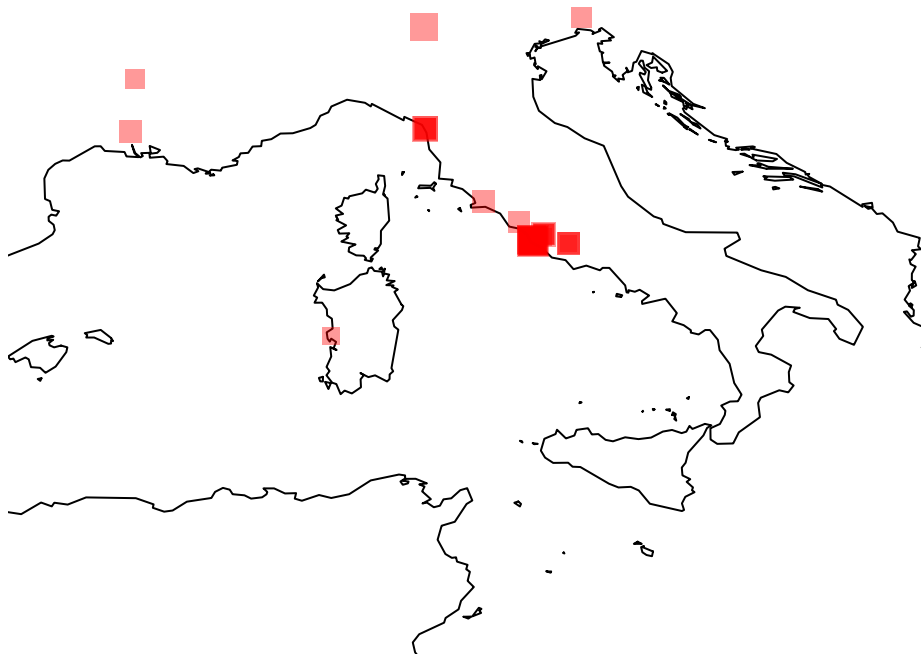

280 cal. BC

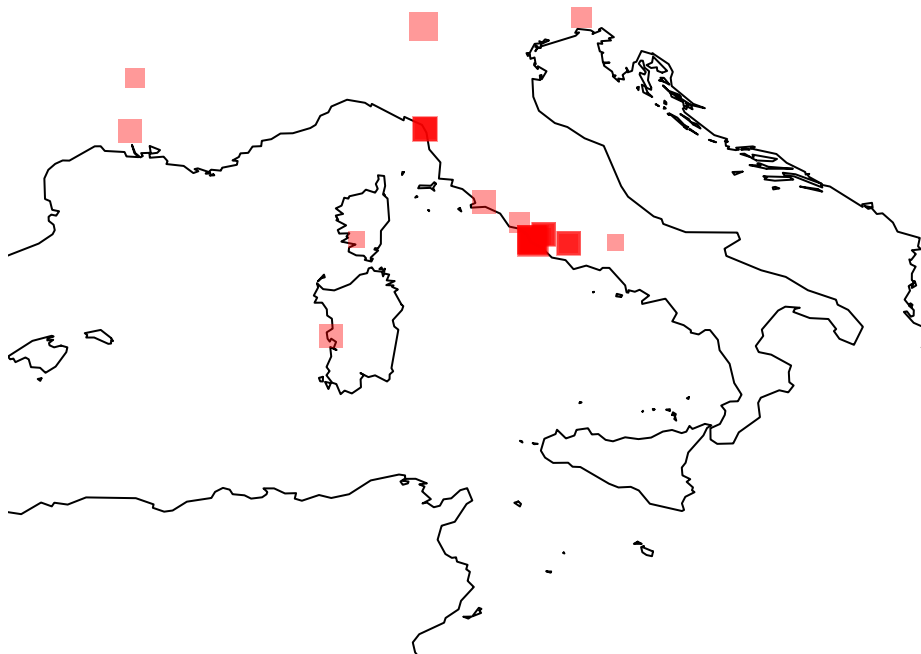







260 cal. BC

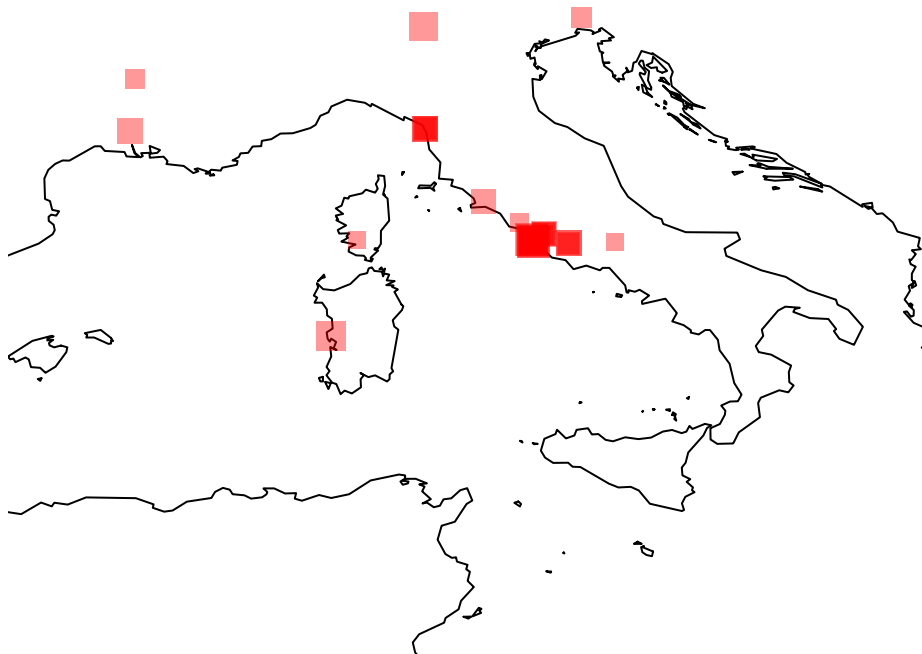







245 cal. BC

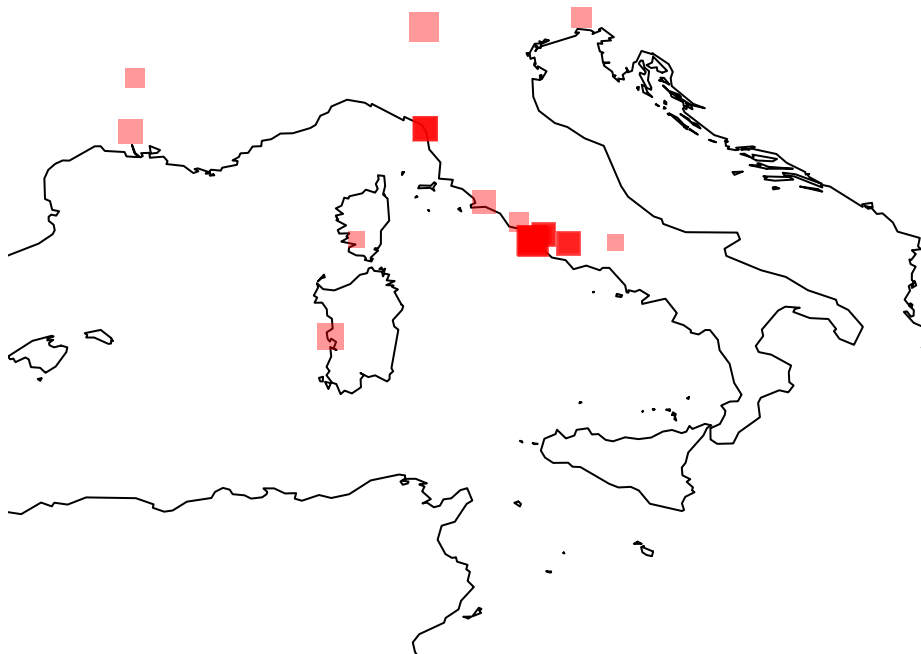



235 cal. BC

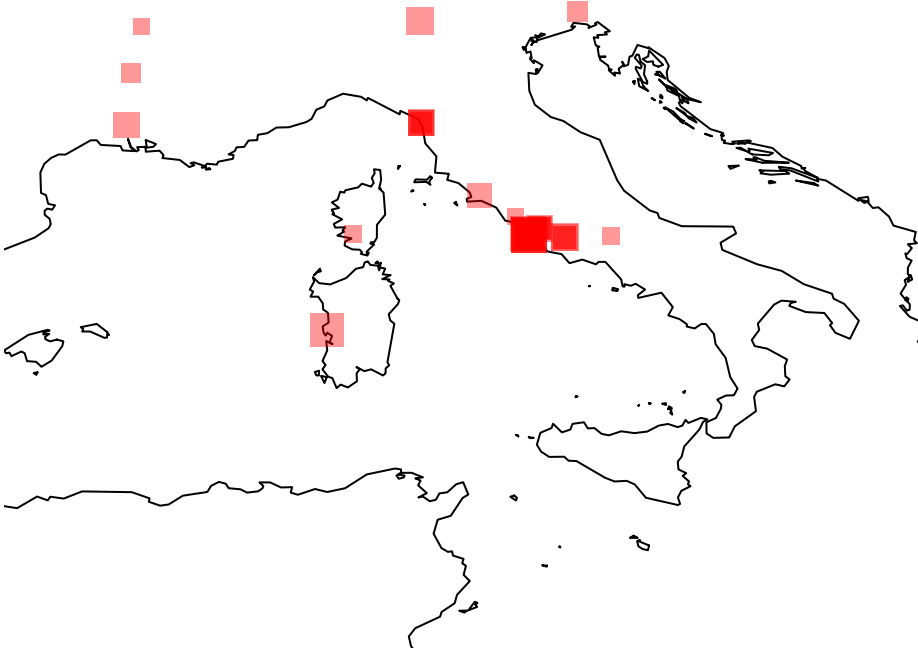



225 cal. BC

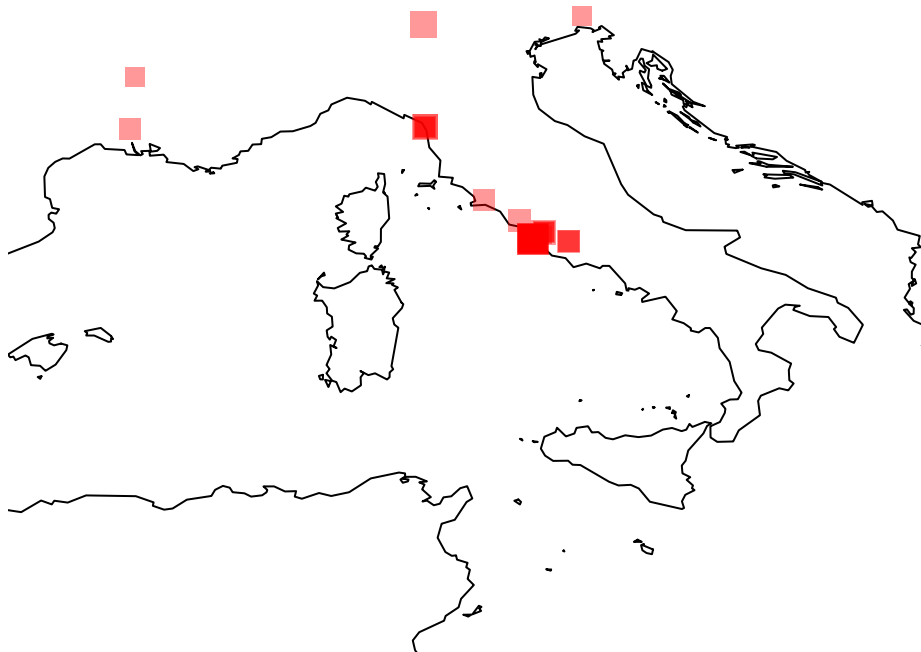



215 cal. BC

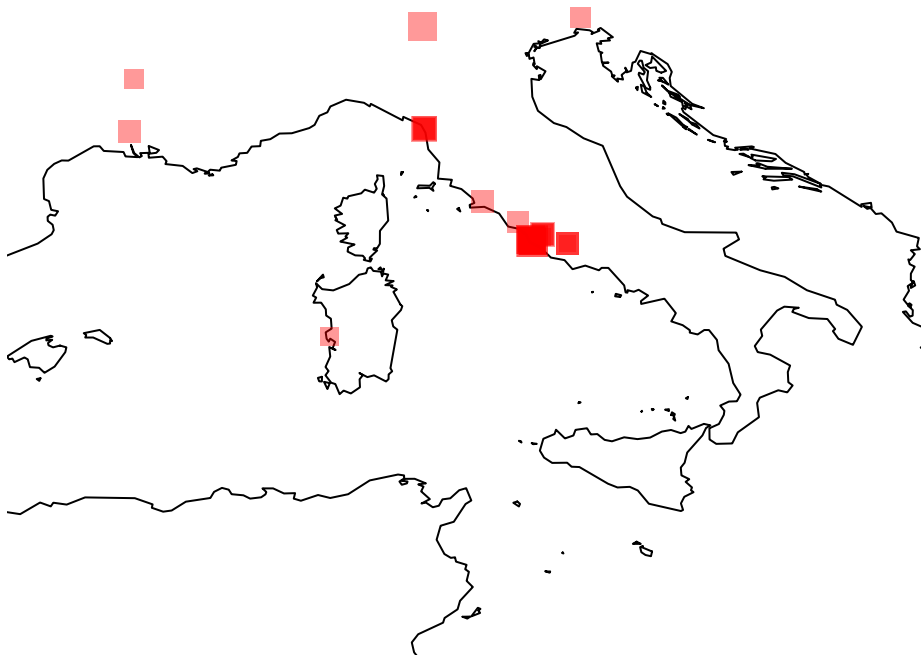

210 cal. BC

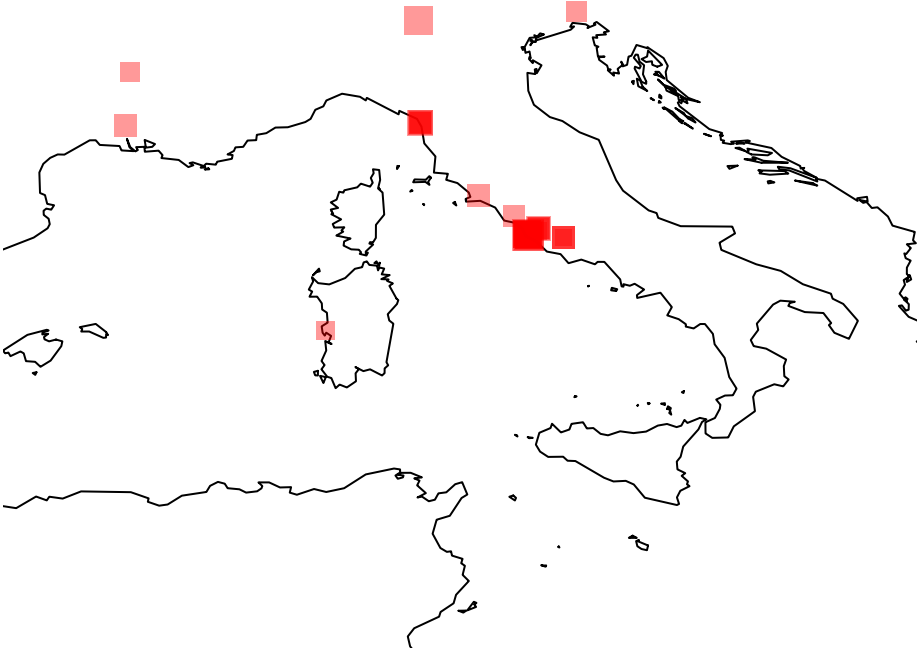



205 cal. BC

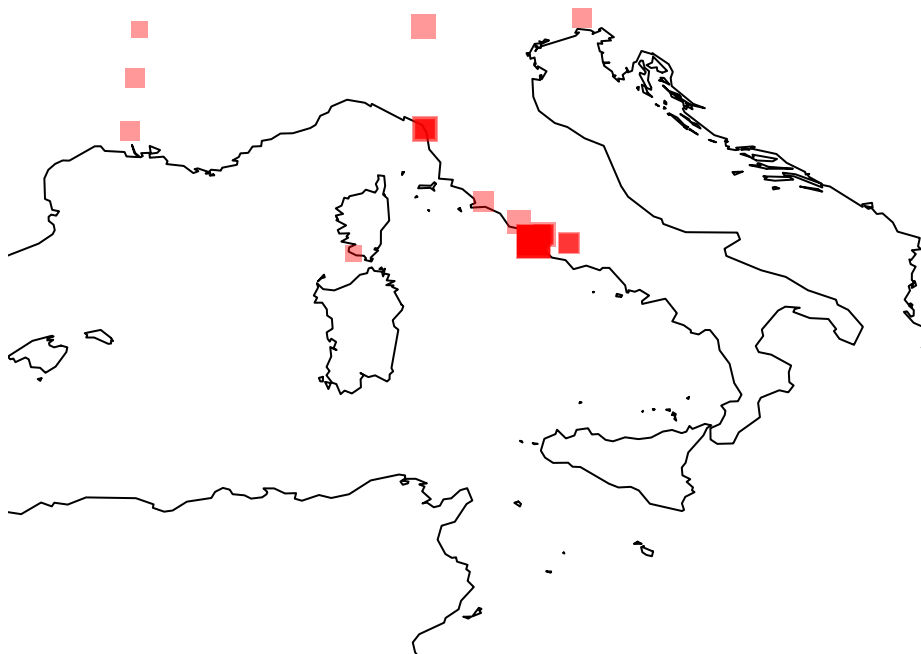



195 cal. BC

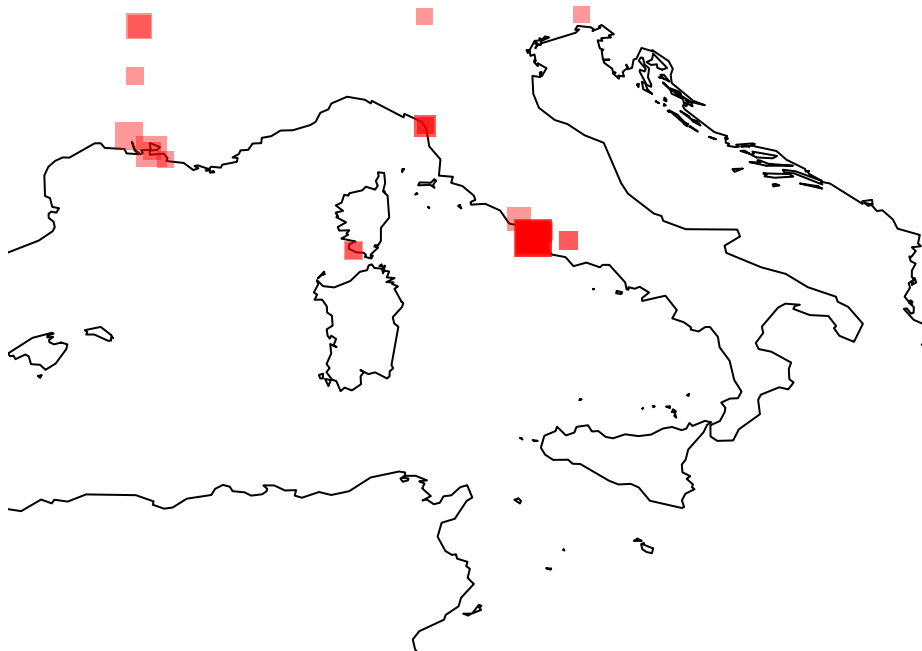

190 cal. BC

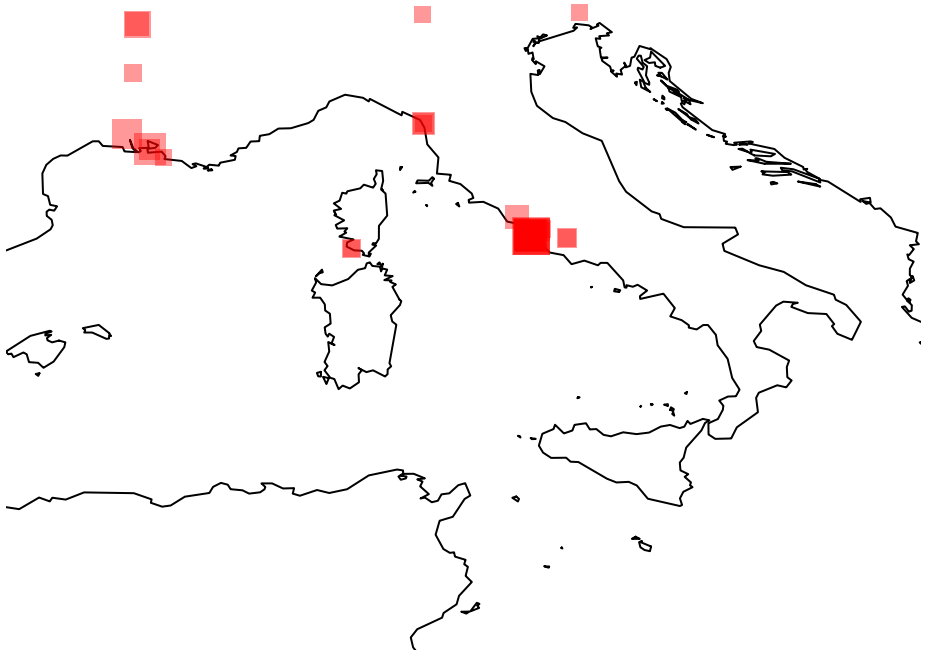



180 cal. BC

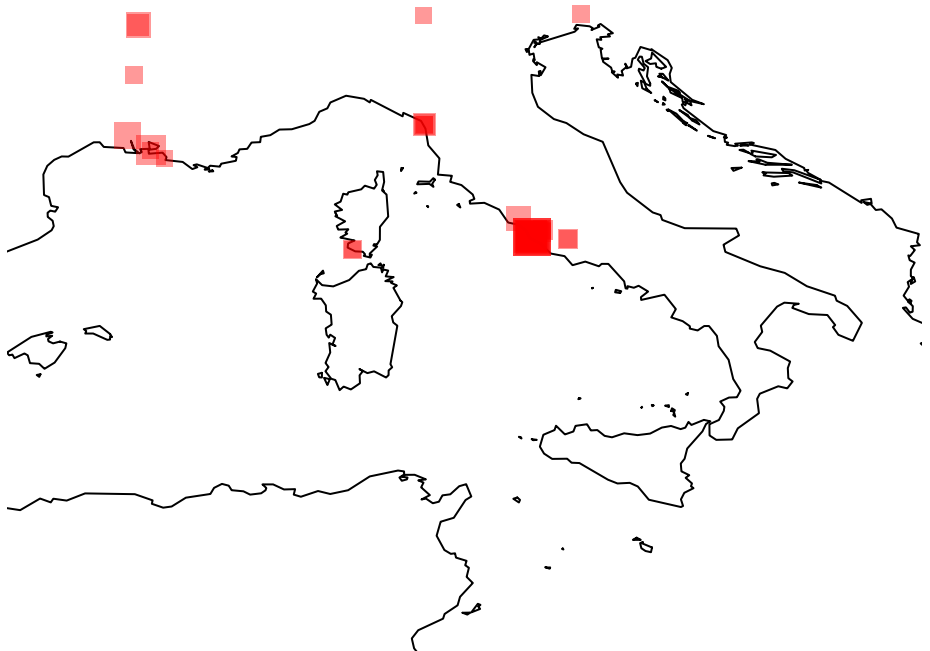

175 cal. BC

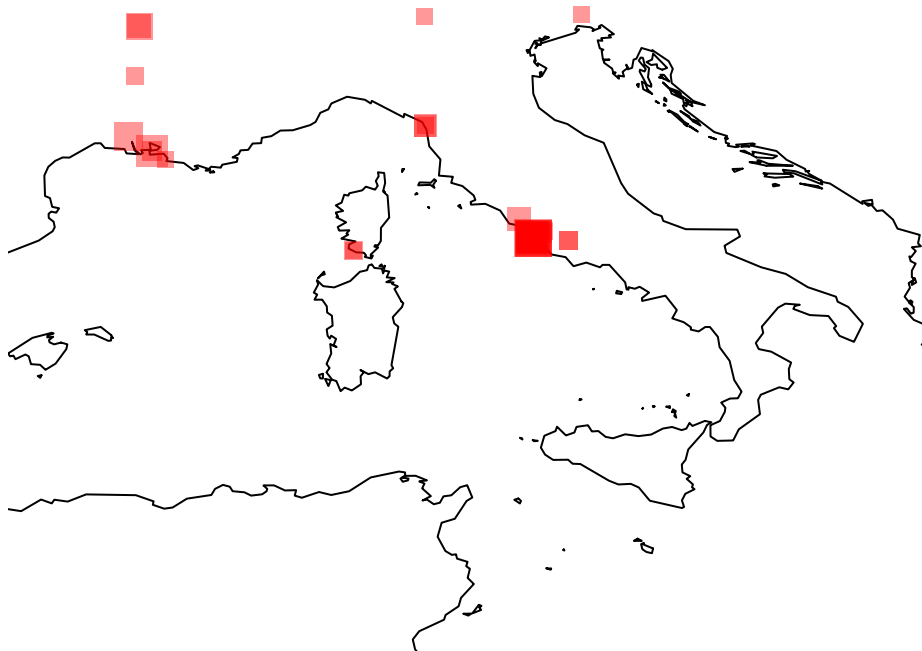

**170 cal. BC**

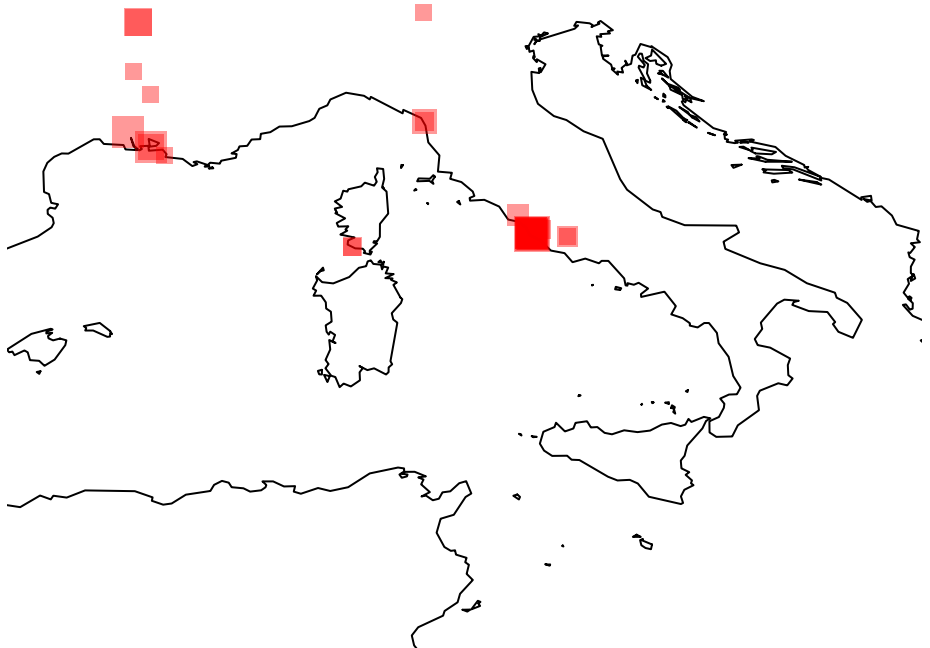





**160 cal. BC**

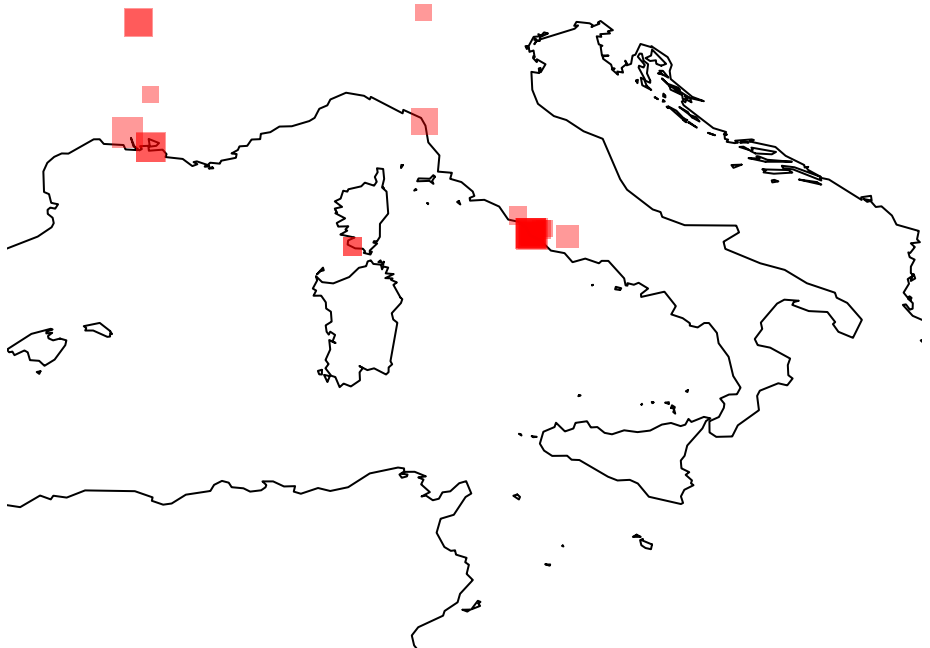

155 cal. BC

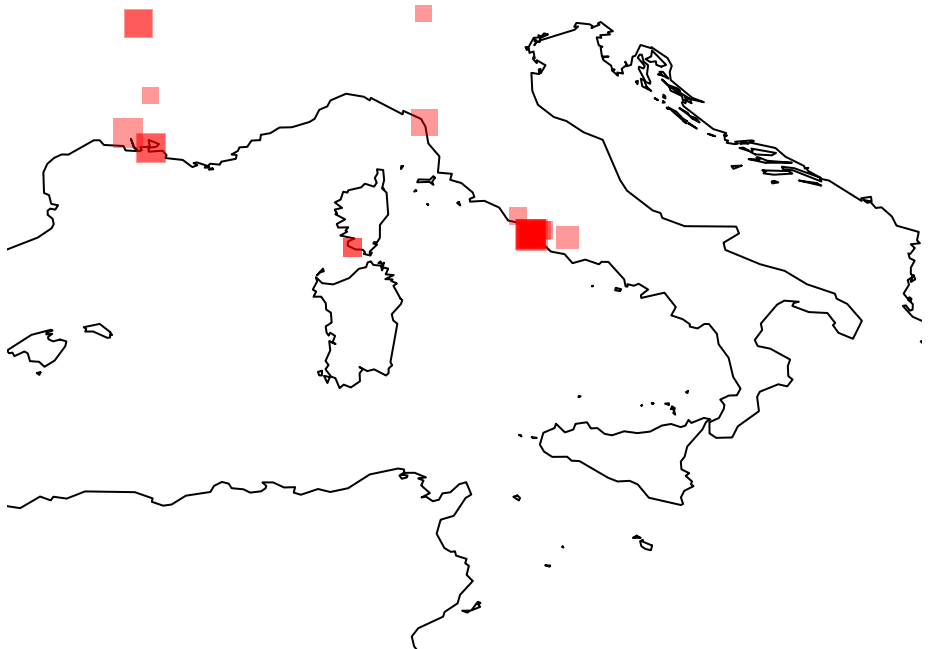



145 cal. BC

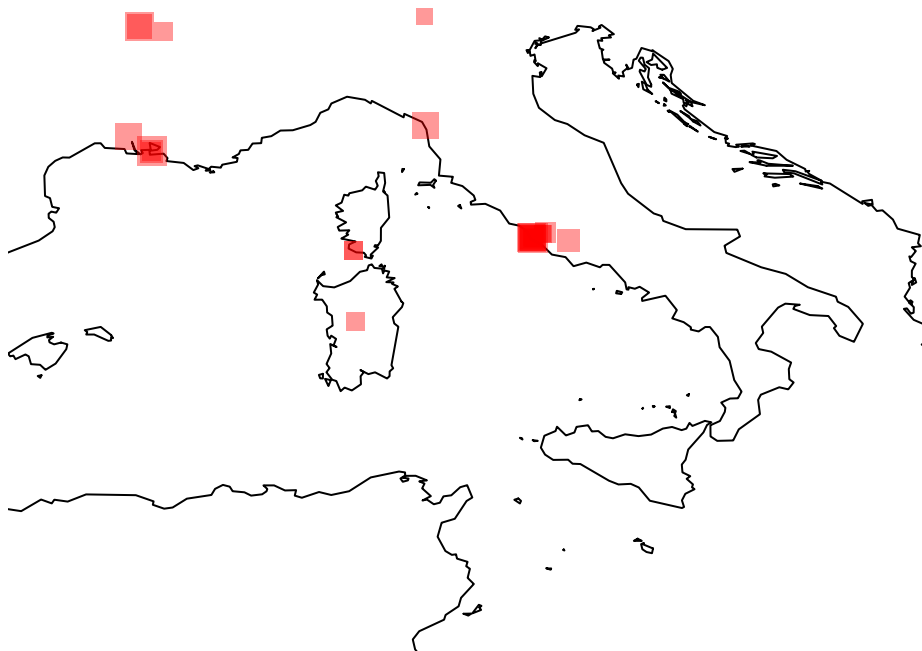



135 cal. BC

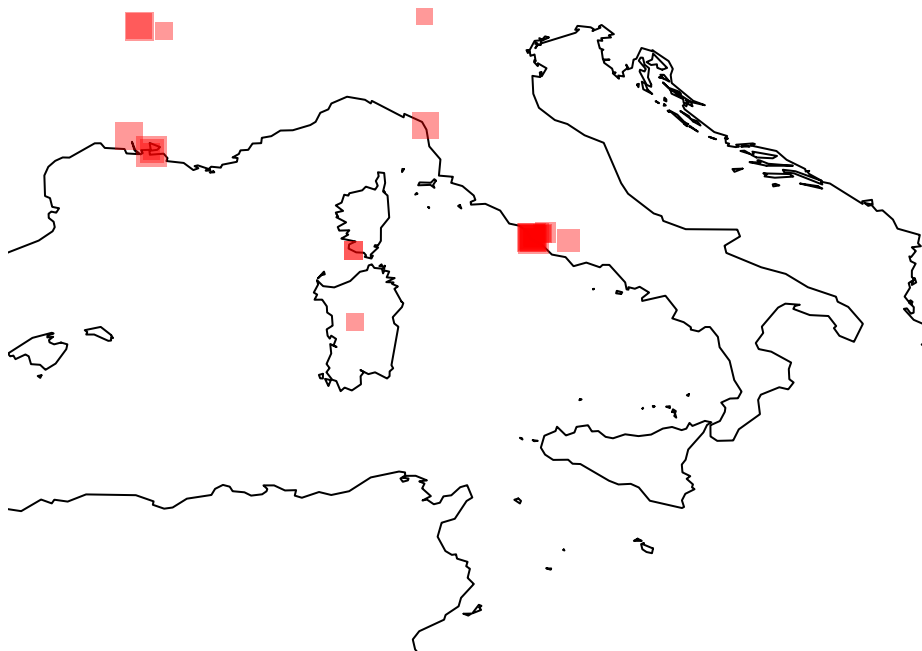

130 cal. BC

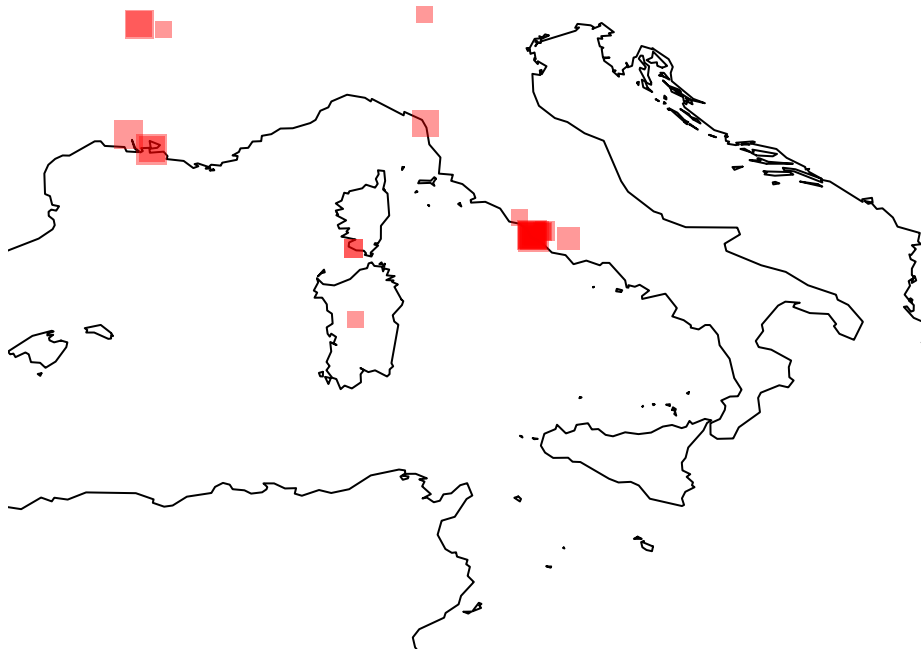



125 cal. BC

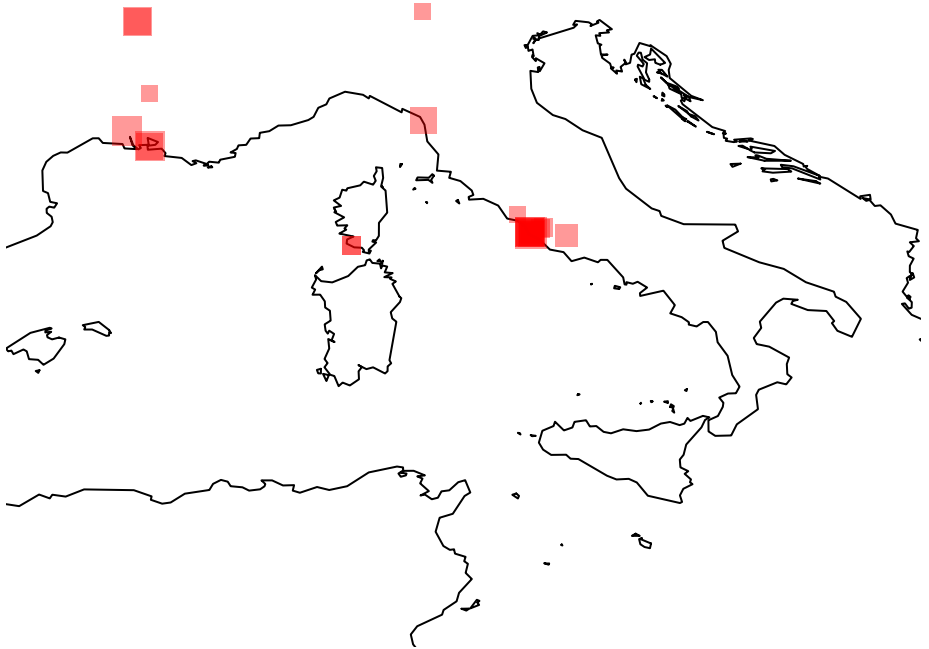

120 cal. BC



115 cal. BC

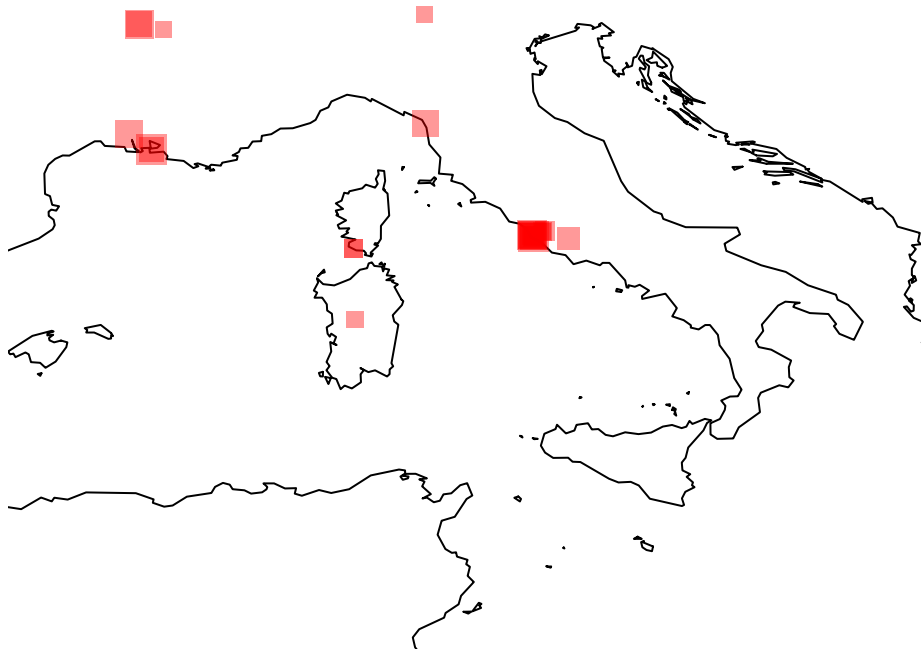



105 cal. BC

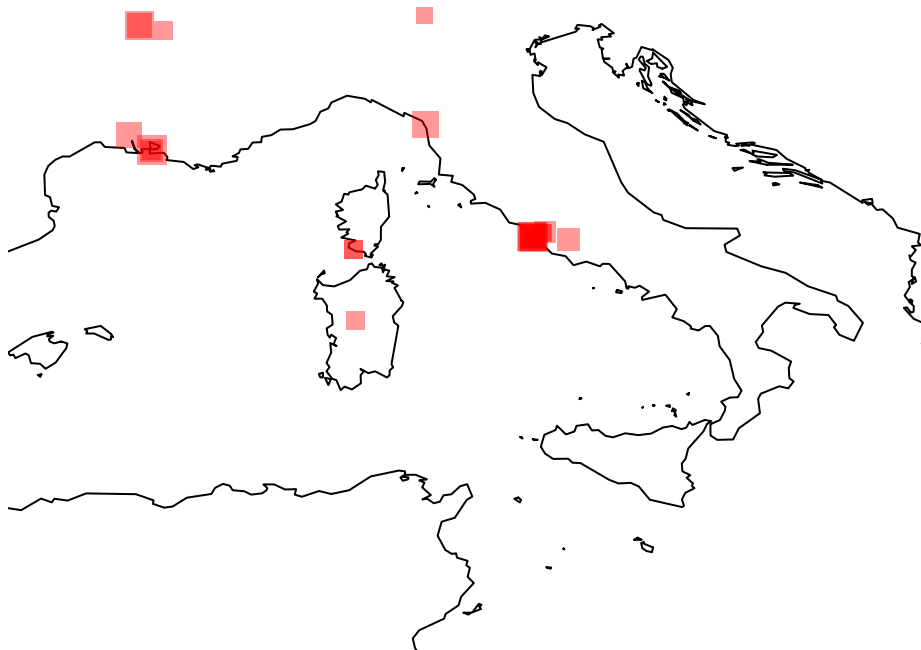

**100 cal. BC**

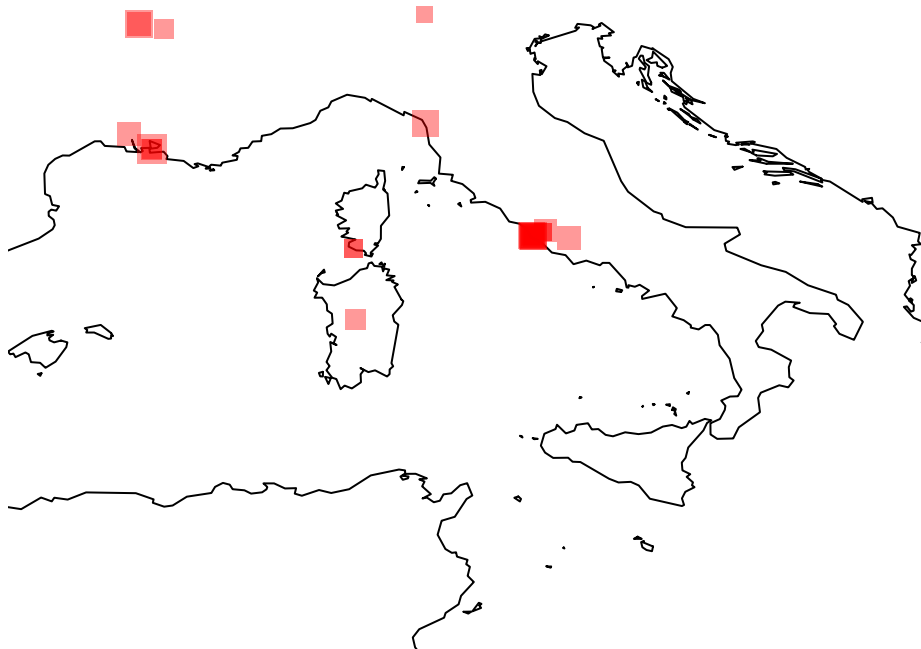







85 cal. BC

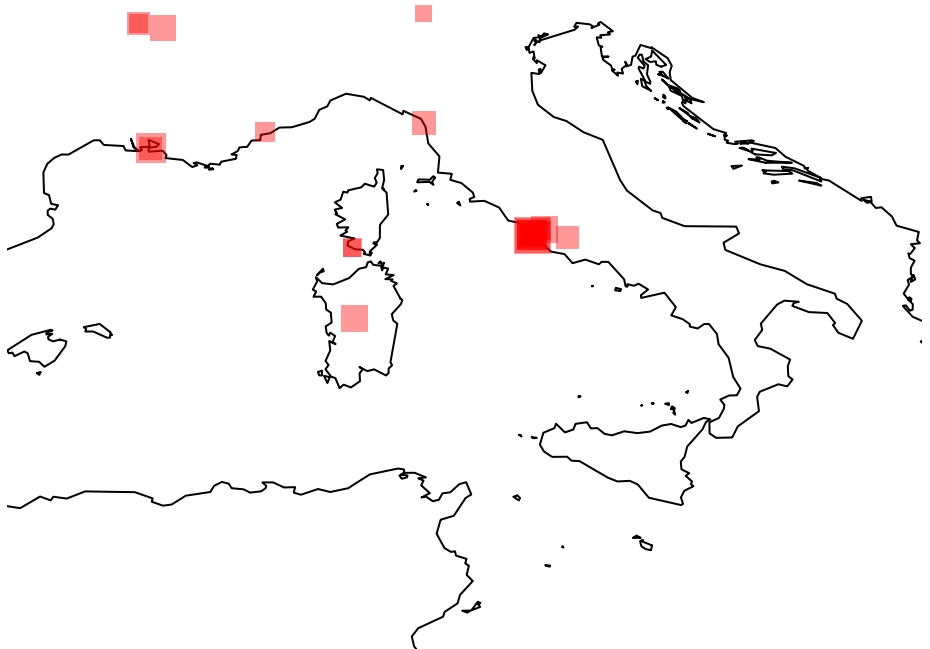

80 cal. BC

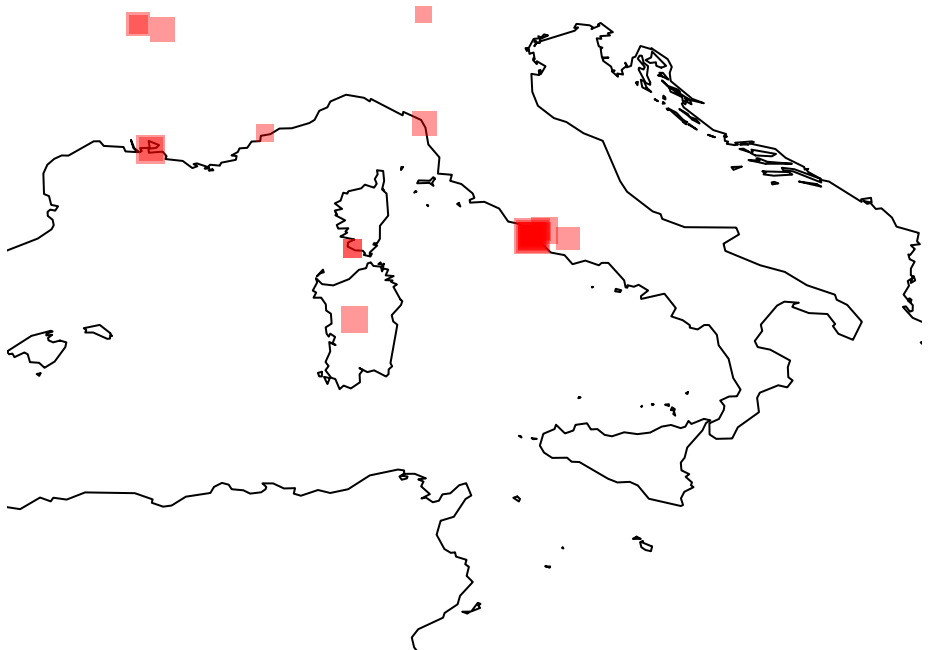



70 cal. BC

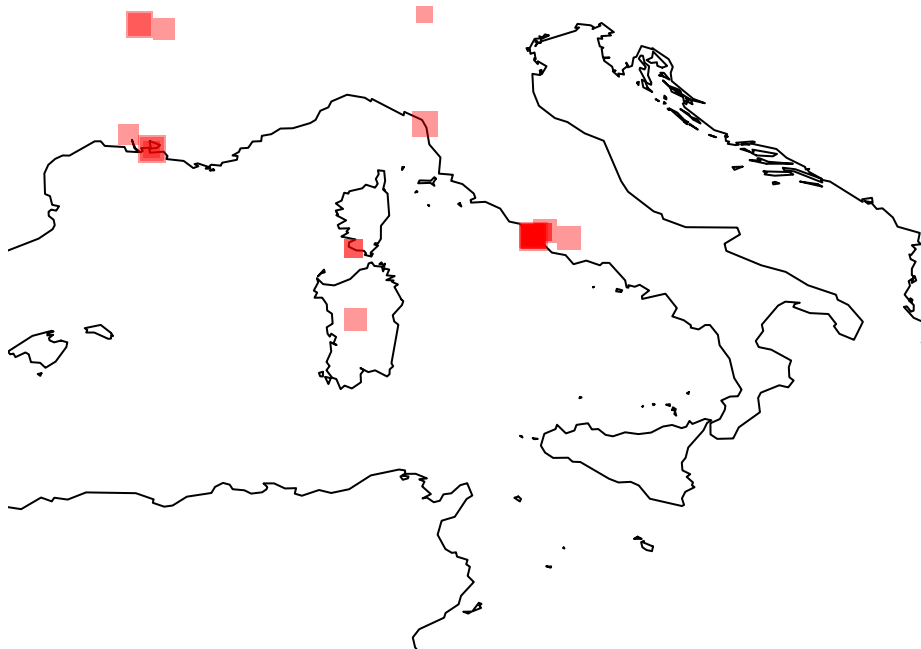

65 cal. BC

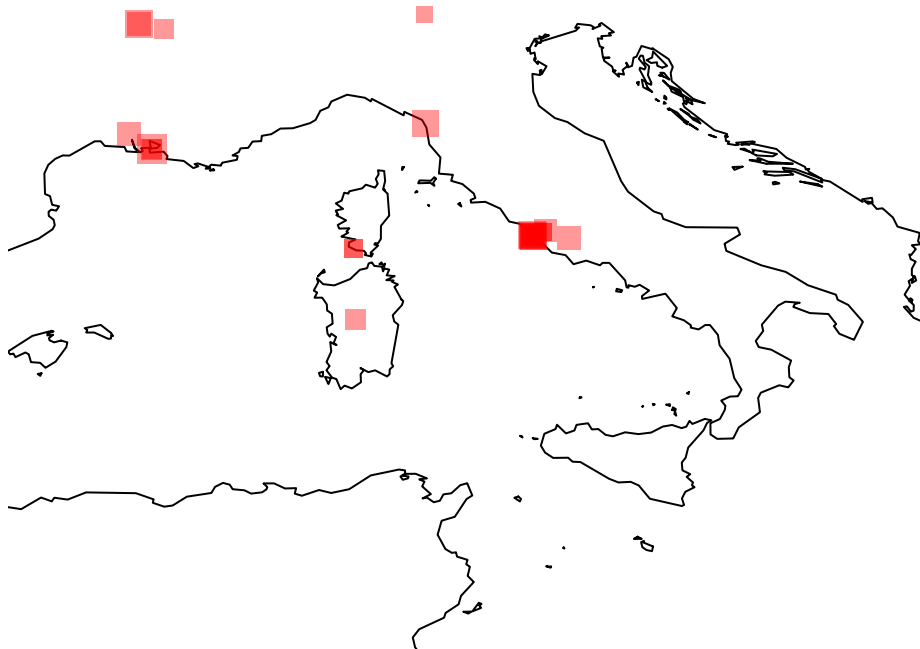

60 cal. BC

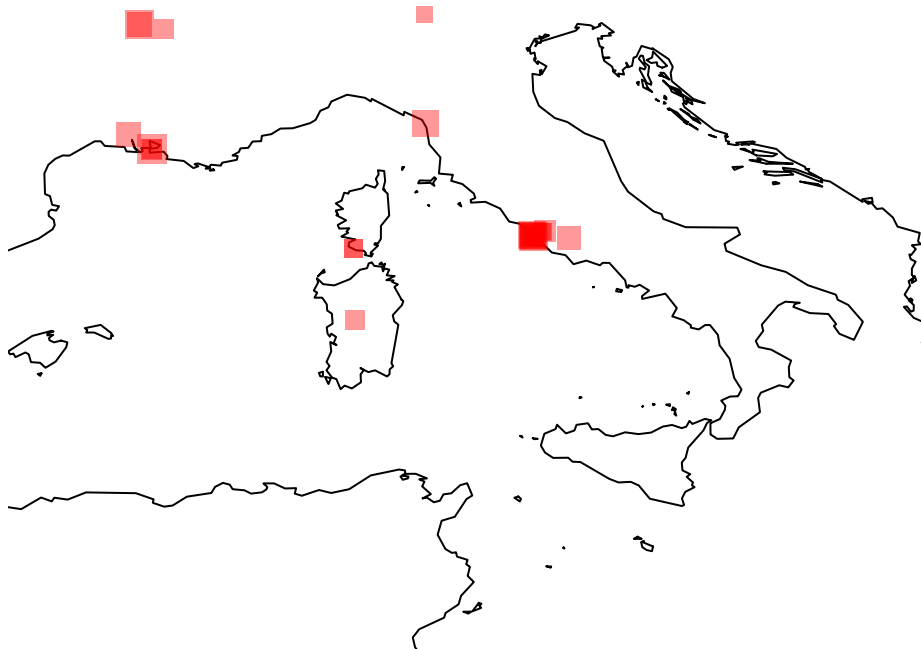



**50 cal. BC**

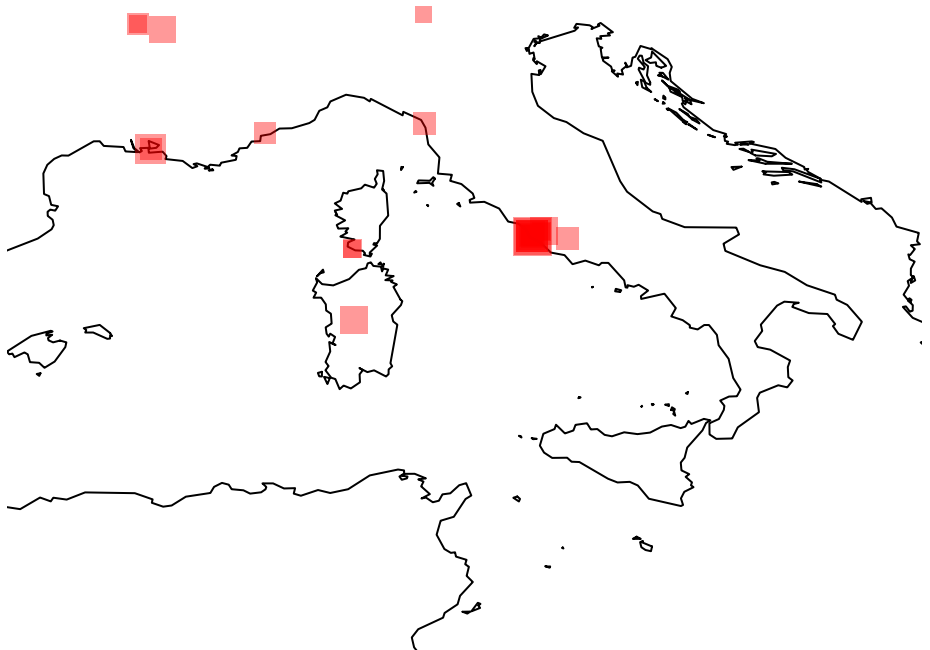



45 cal. BC

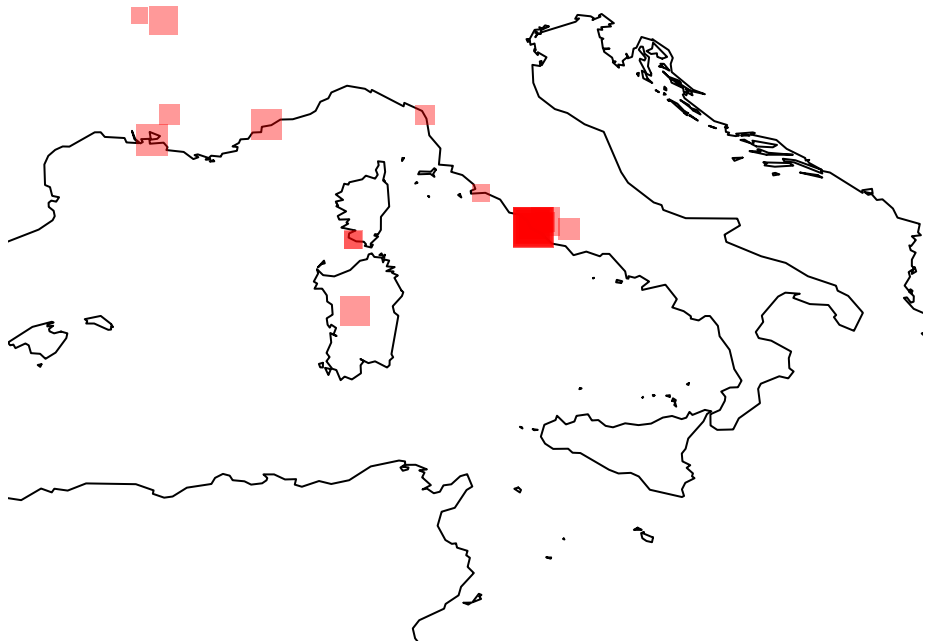

40 cal. BC

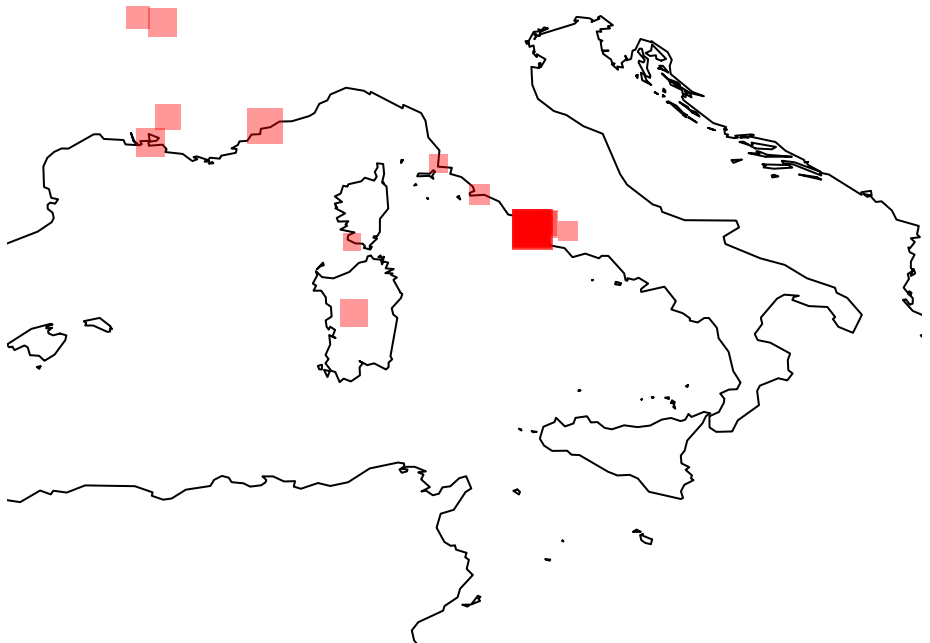

35 cal. BC

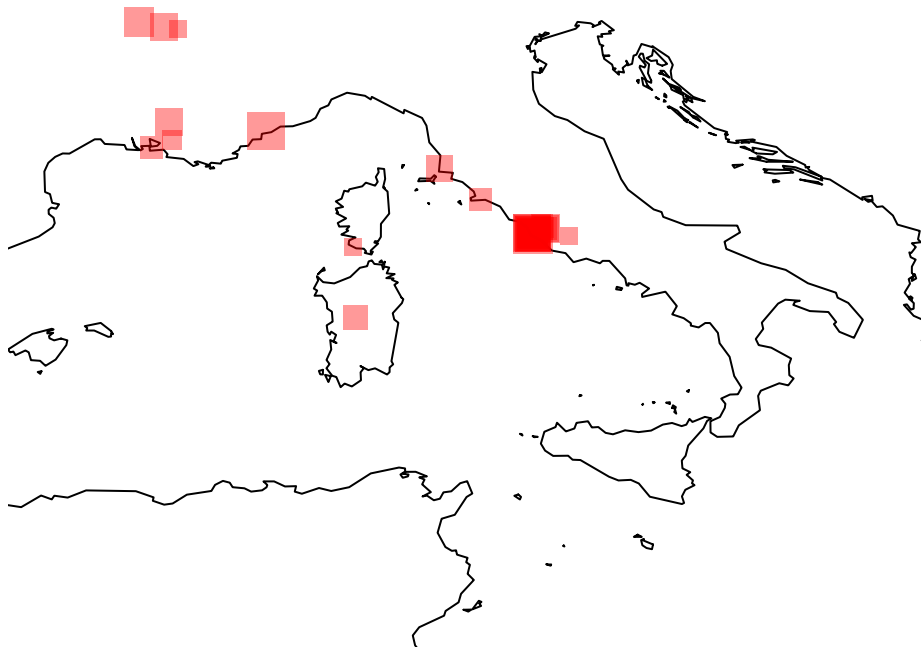



25 cal. BC

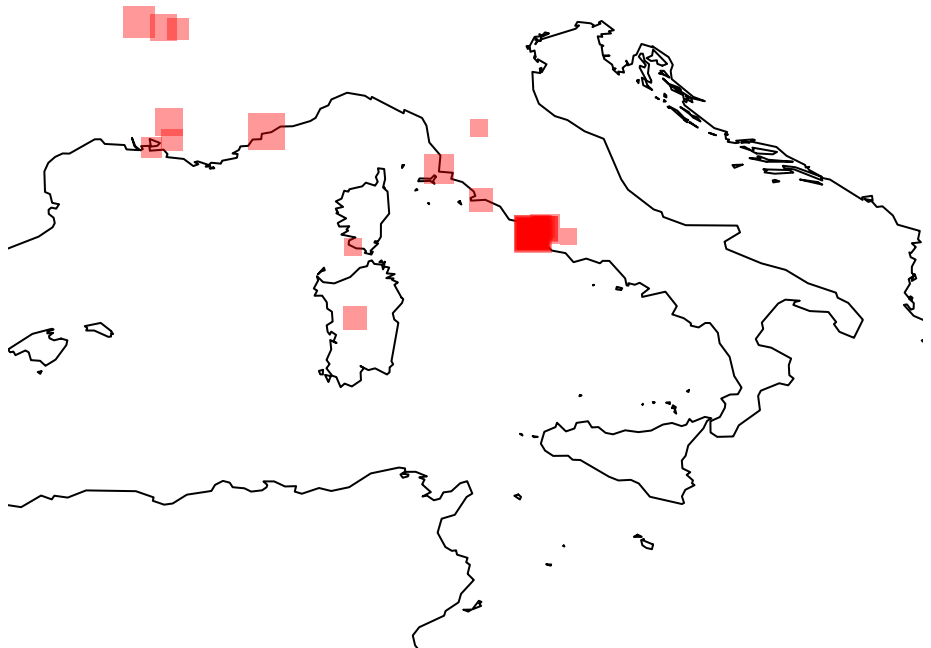









5 cal. BC

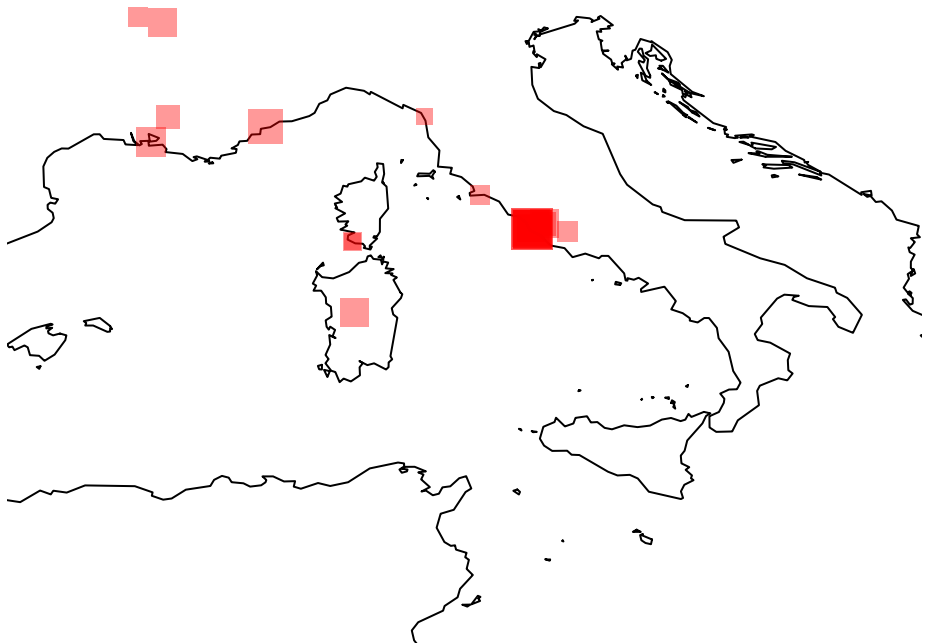

**0 cal. BC**

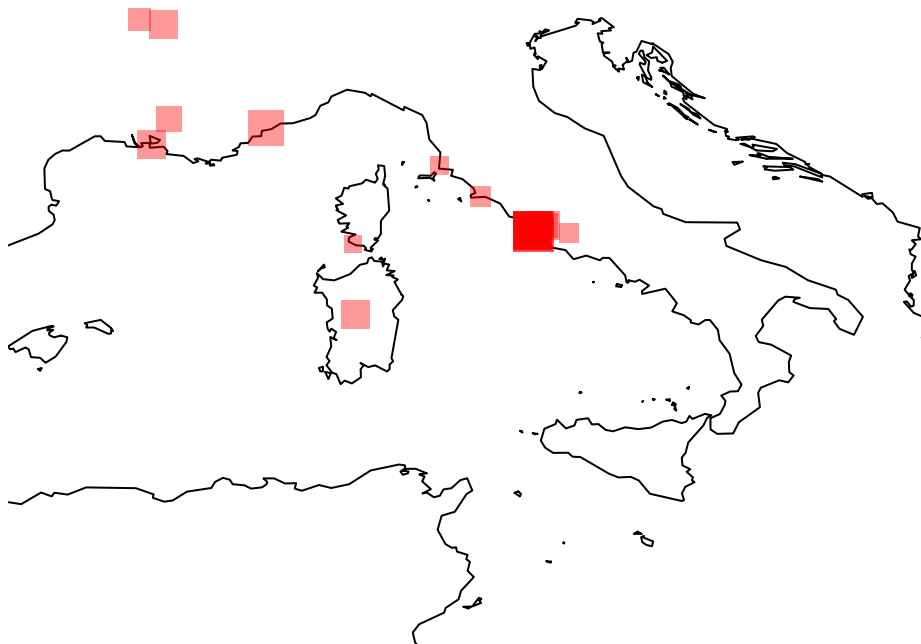



10 cal. AD

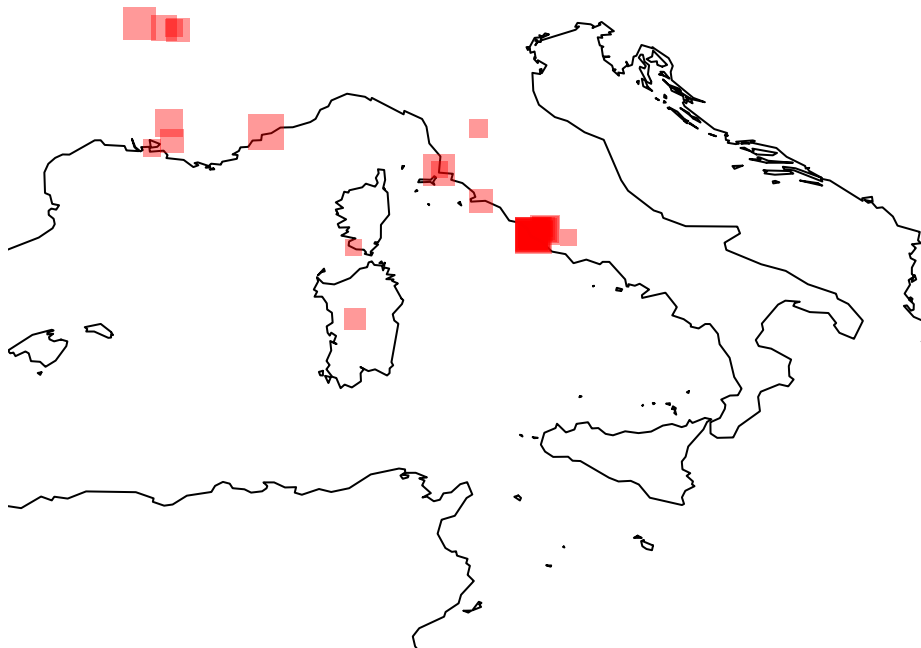

15 cal. AD

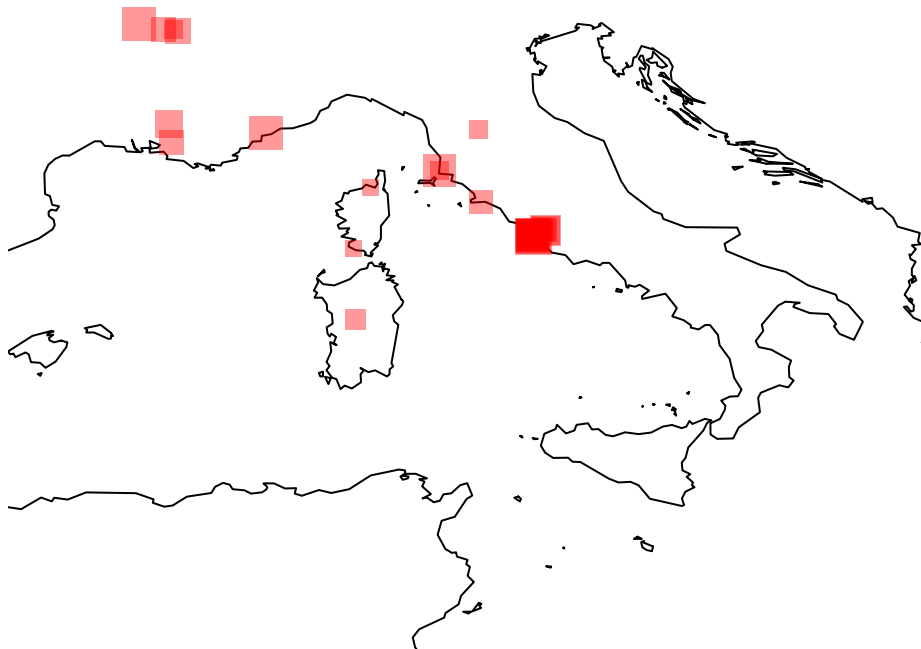

20 cal. AD

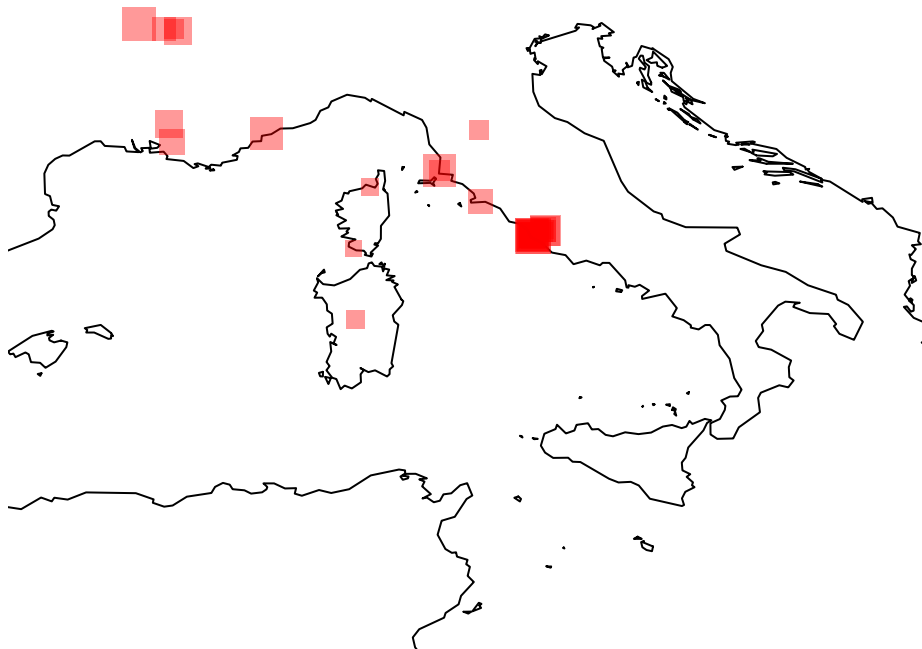



30 cal. AD

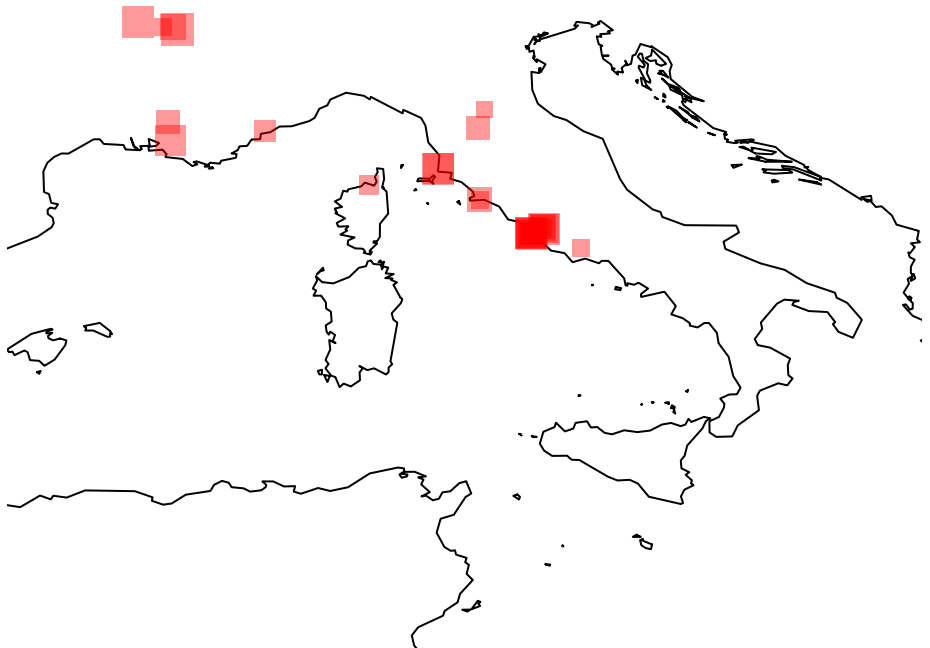



35 cal. AD

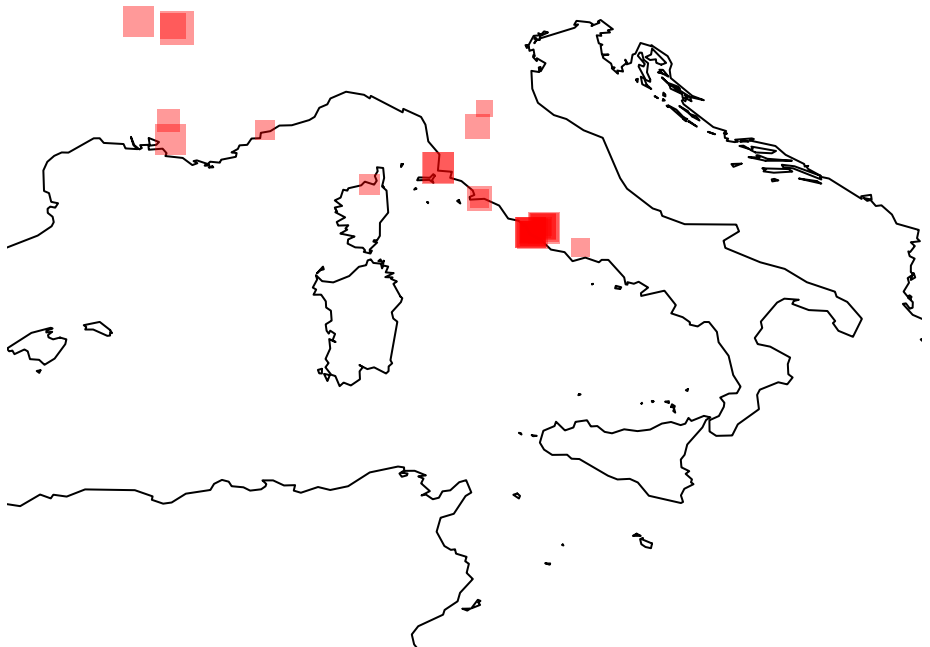

40 cal. AD

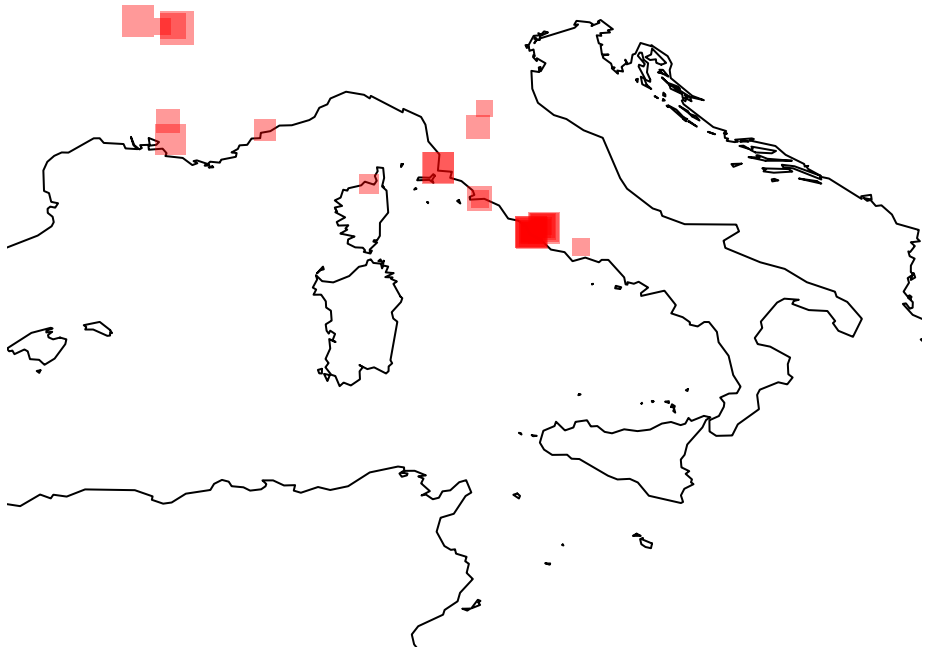

45 cal. AD

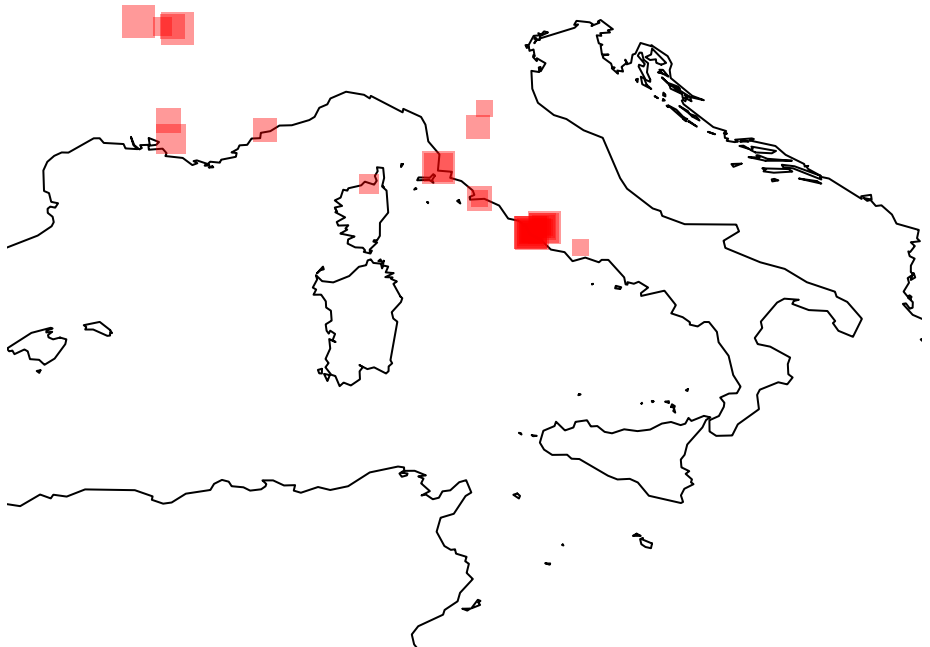

50 cal. AD

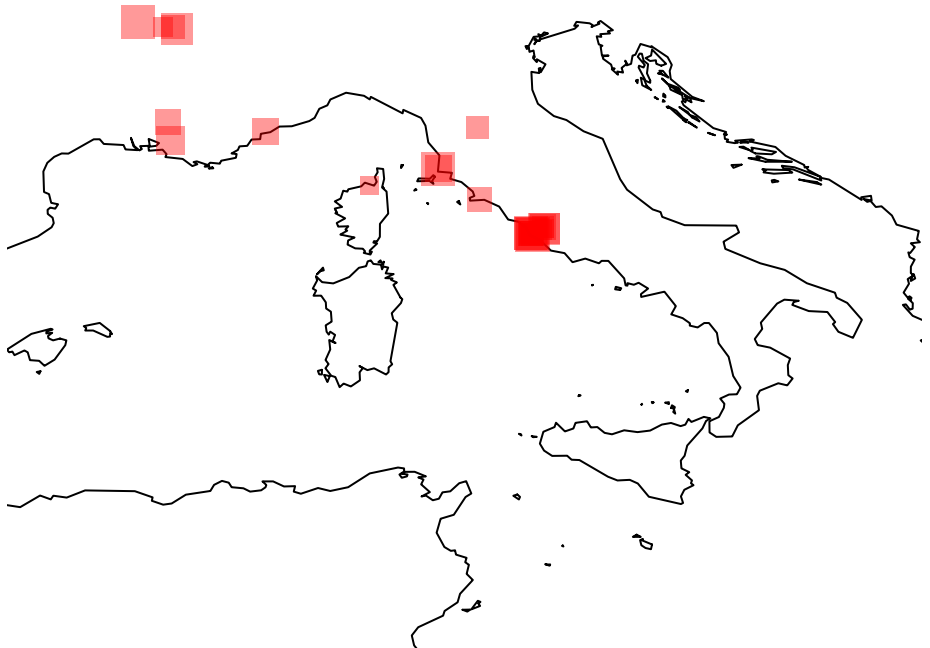



60 cal. AD

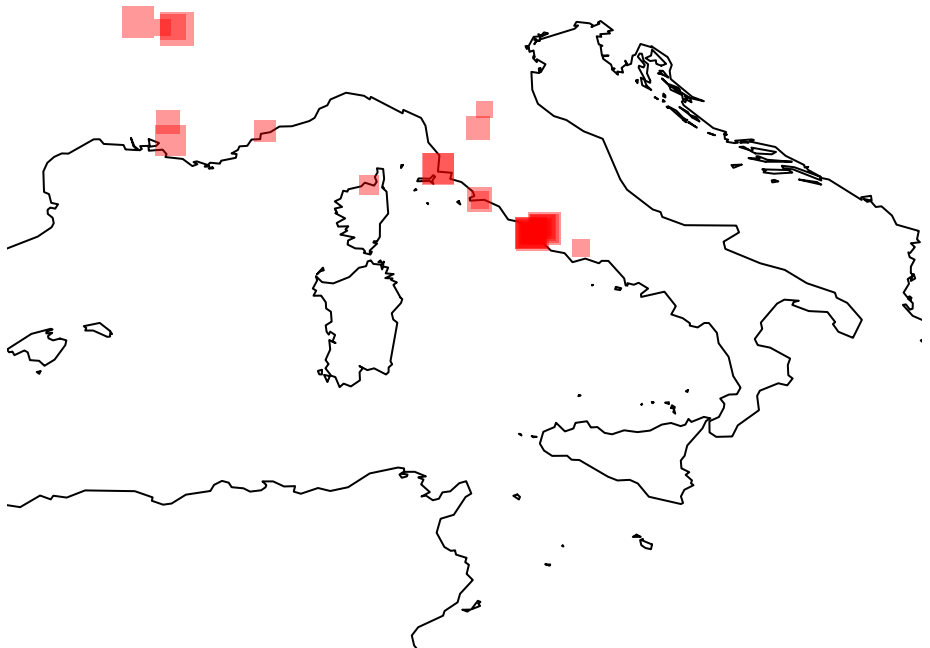

65 cal. AD

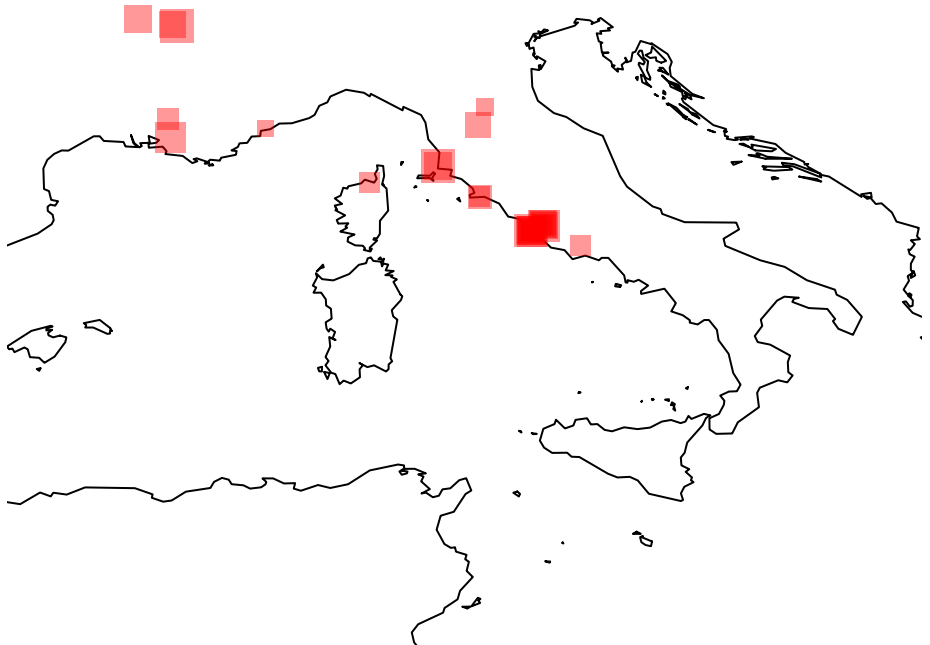

70 cal. AD

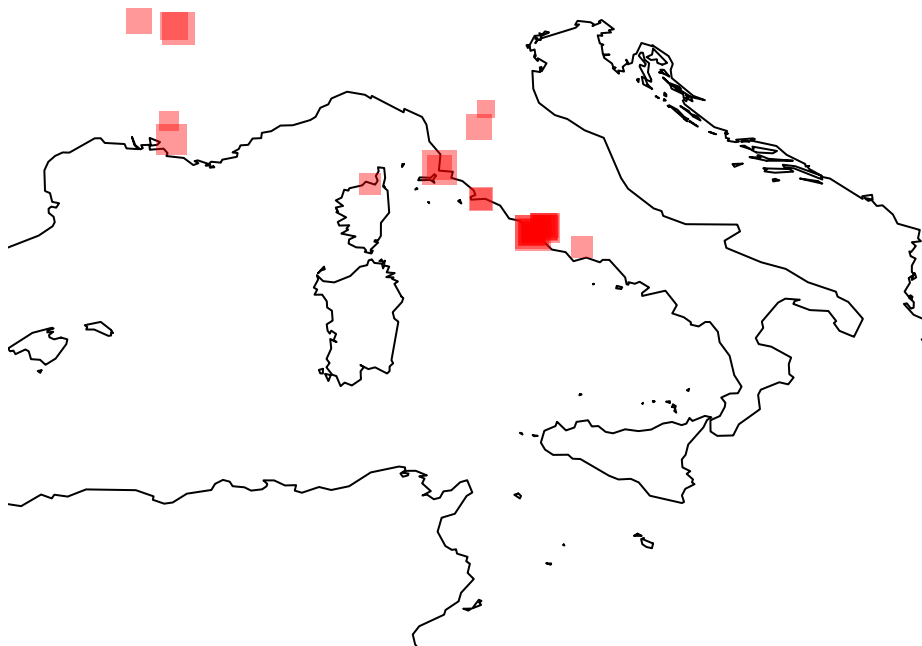



75 cal. AD

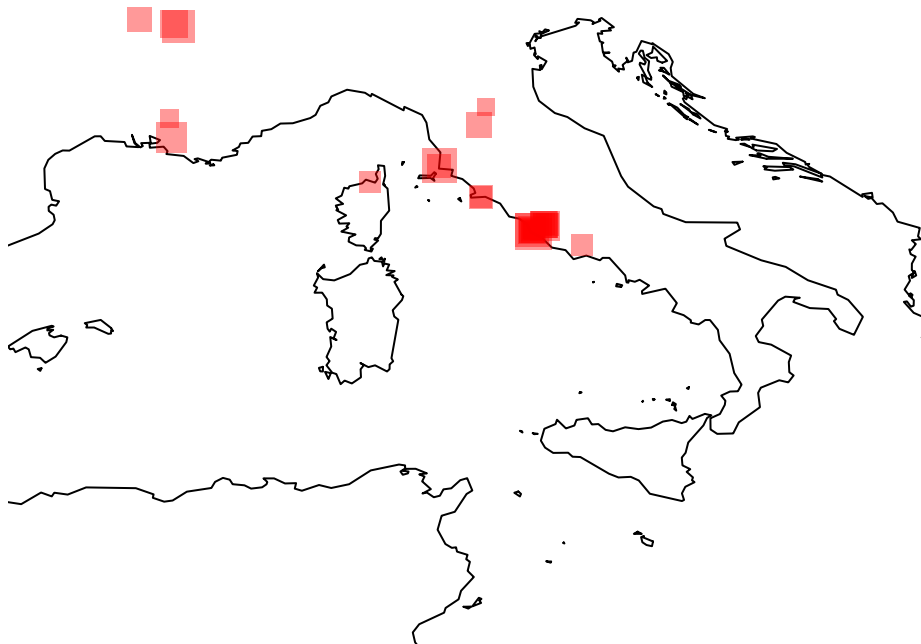

80 cal. AD

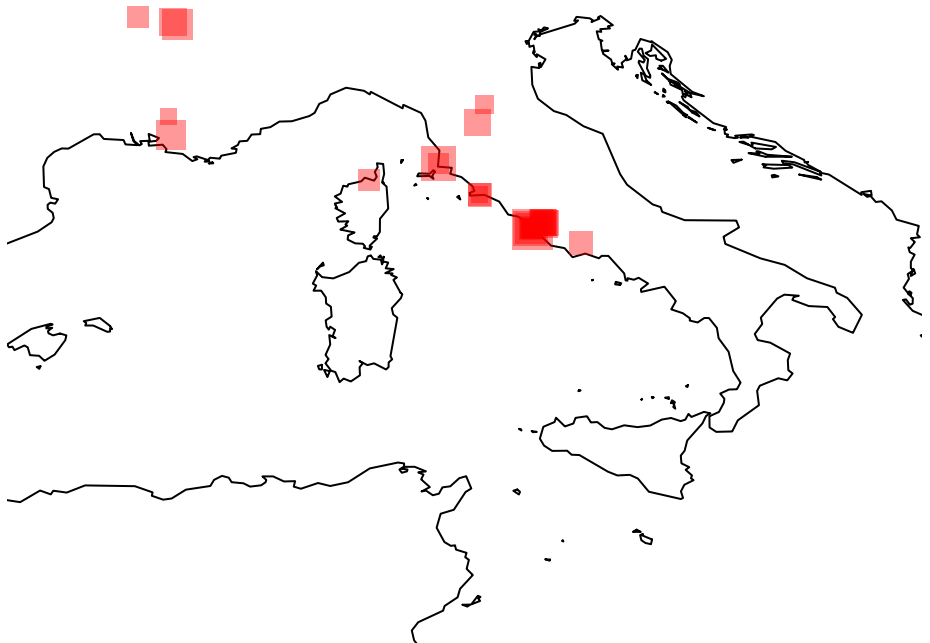



90 cal. AD

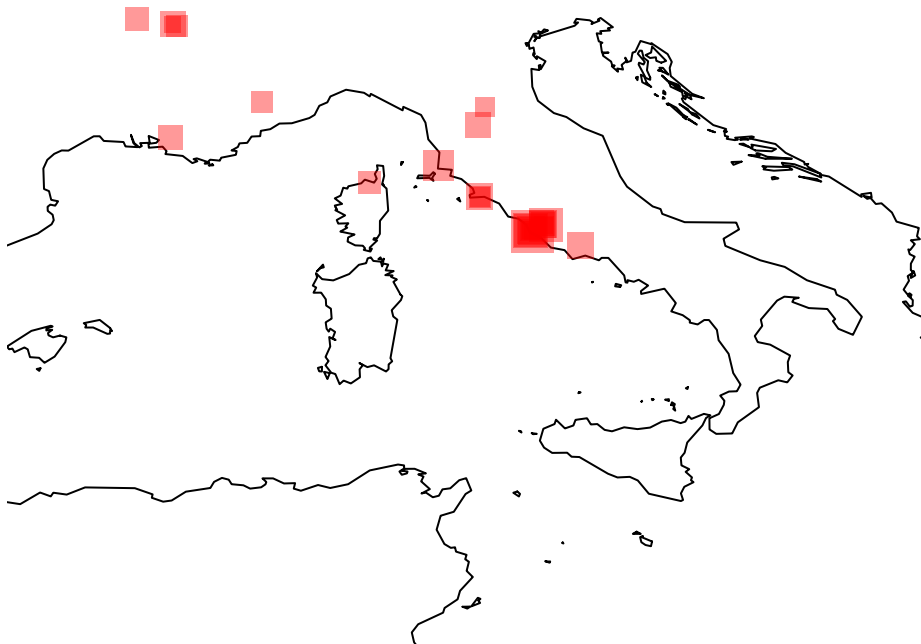

95 cal. AD

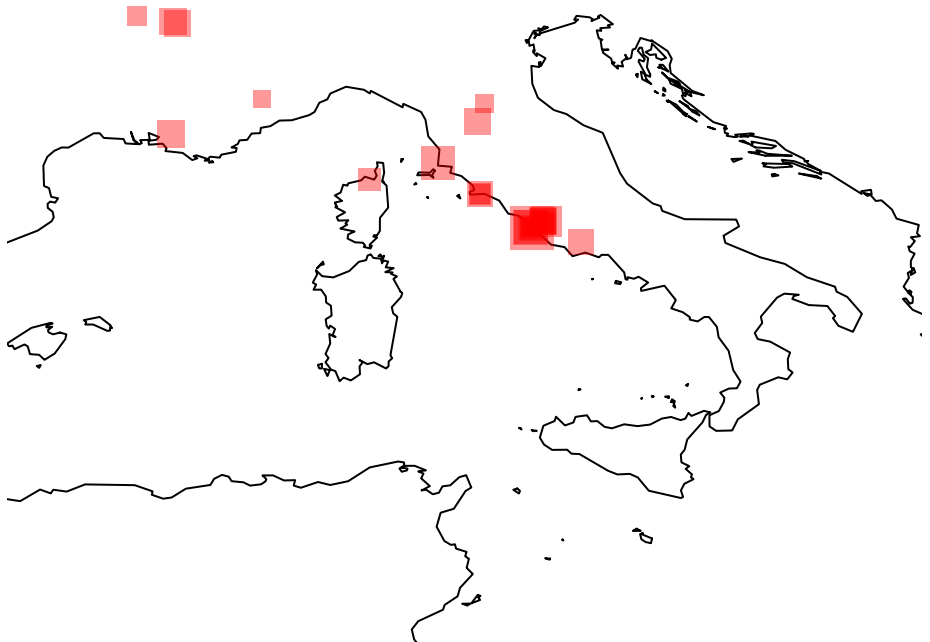



105 cal. AD

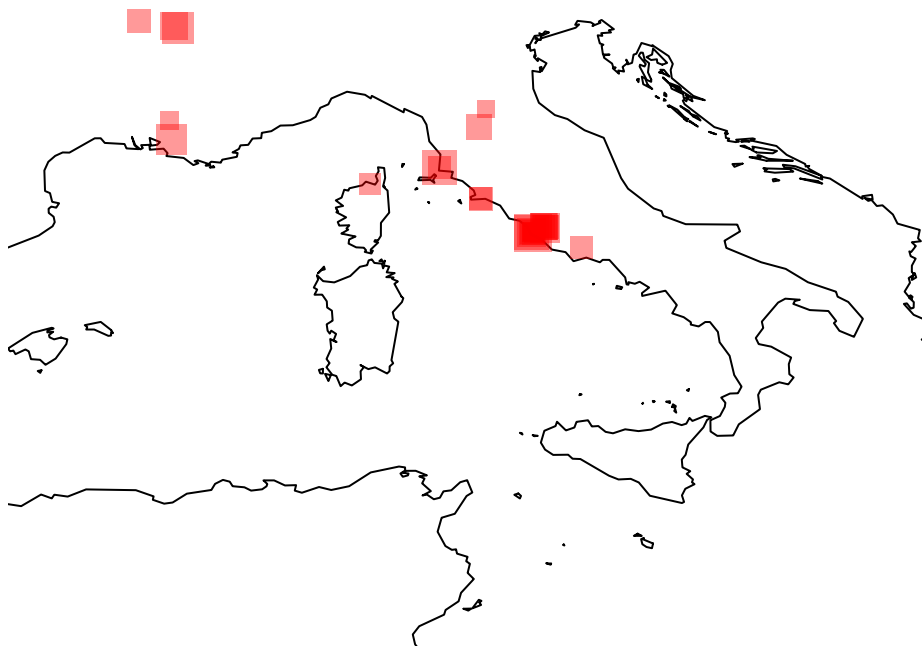







120 cal. AD

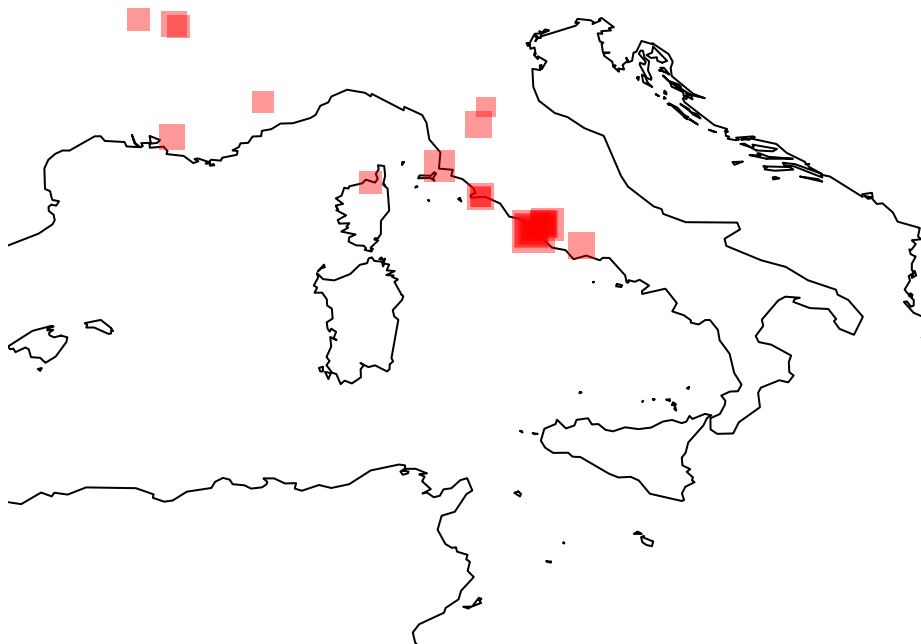





135 cal. AD

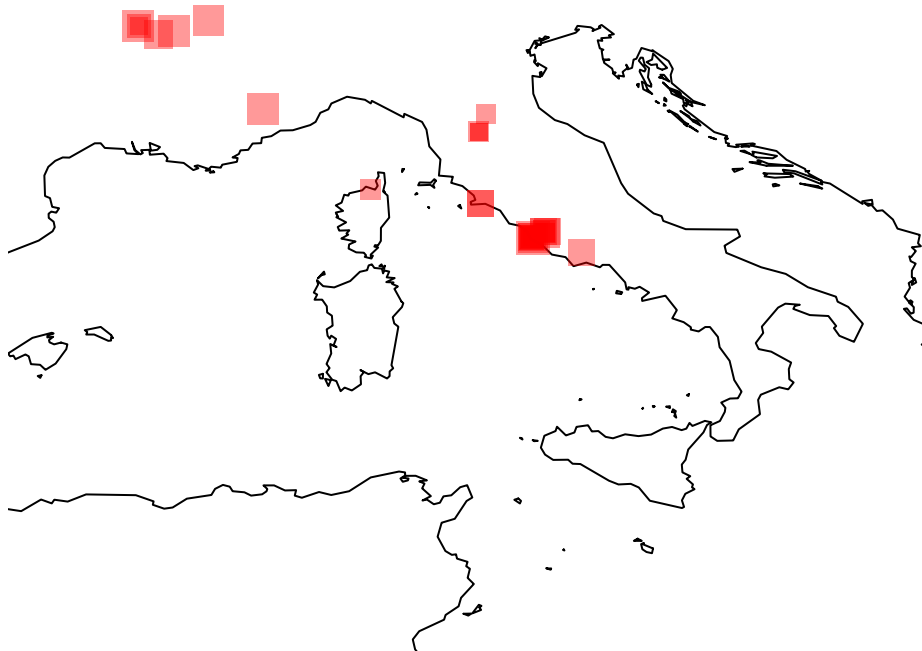





150 cal. AD

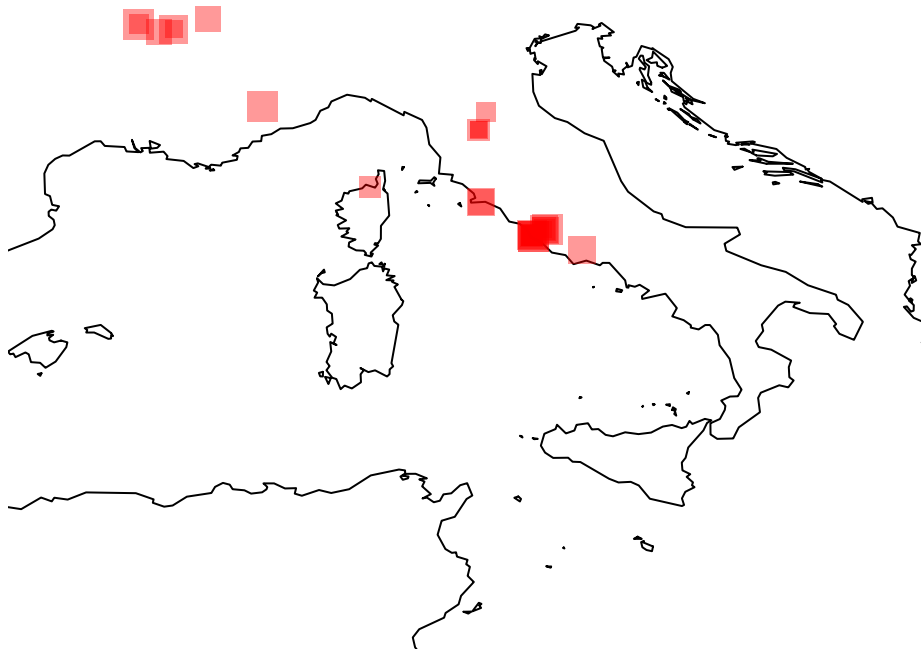





160 cal. AD

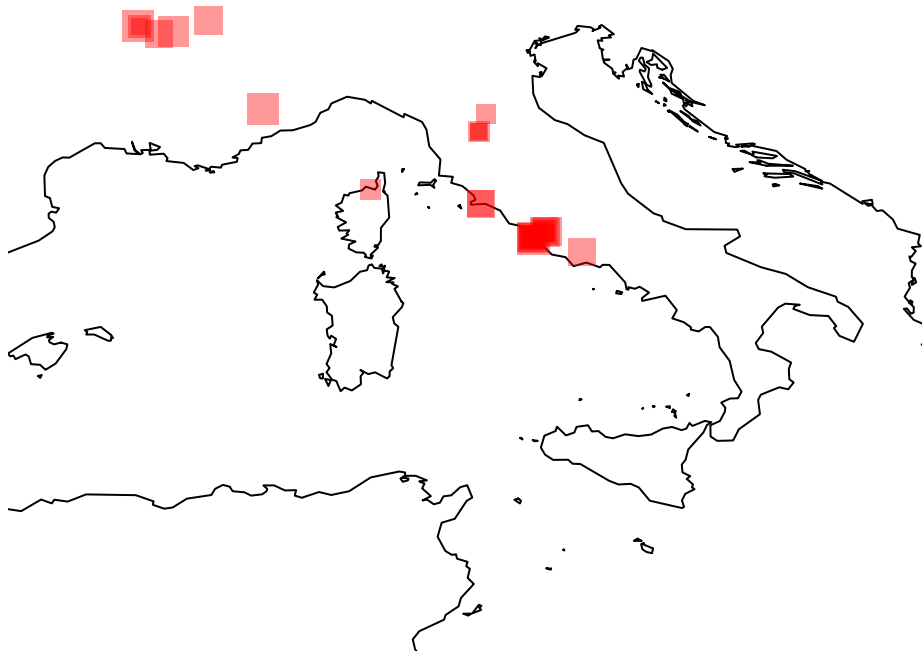



170 cal. AD

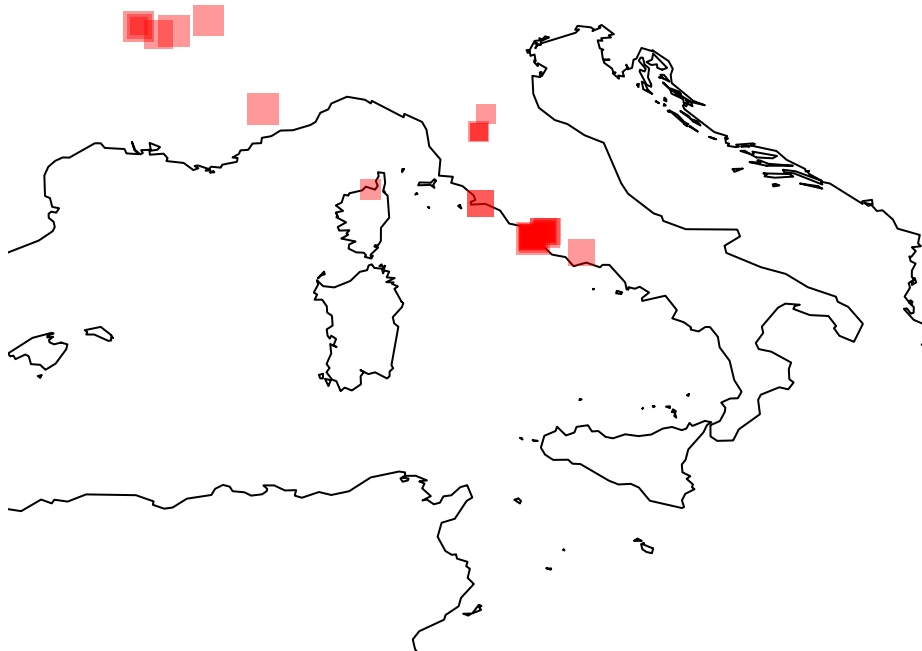

175 cal. AD

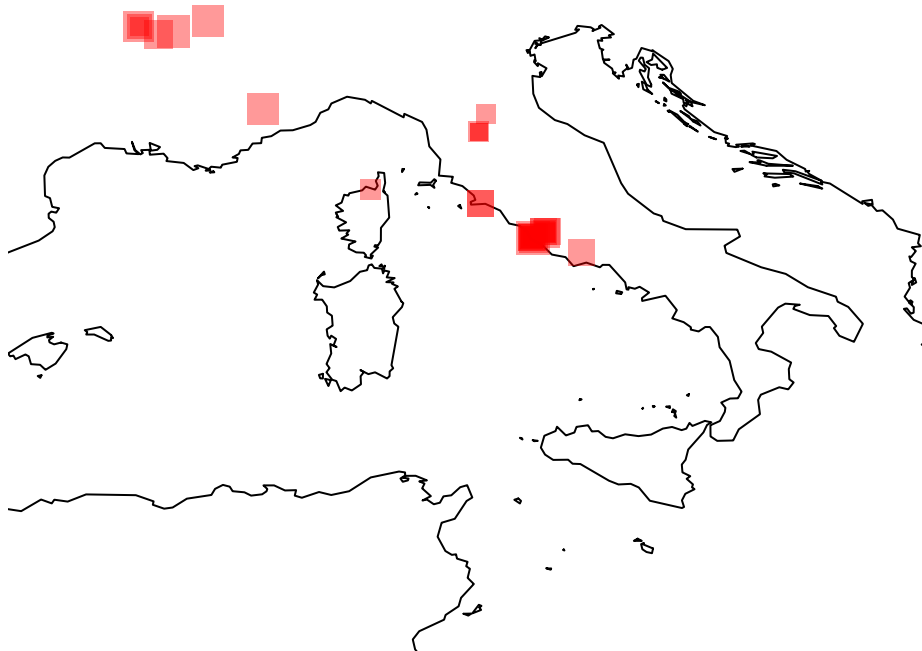

180 cal. AD



185 cal. AD



190 cal. AD

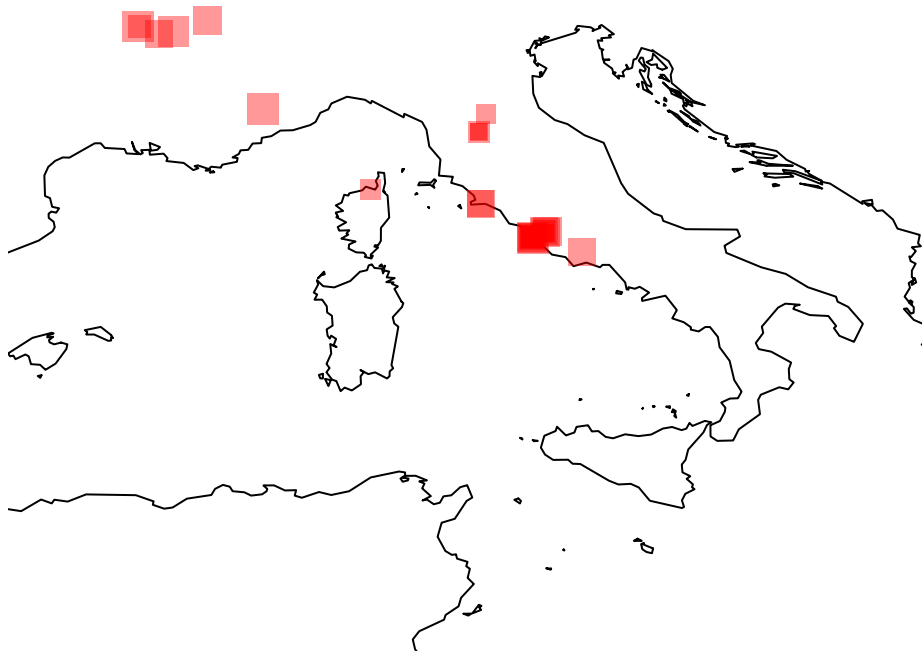



195 cal. AD

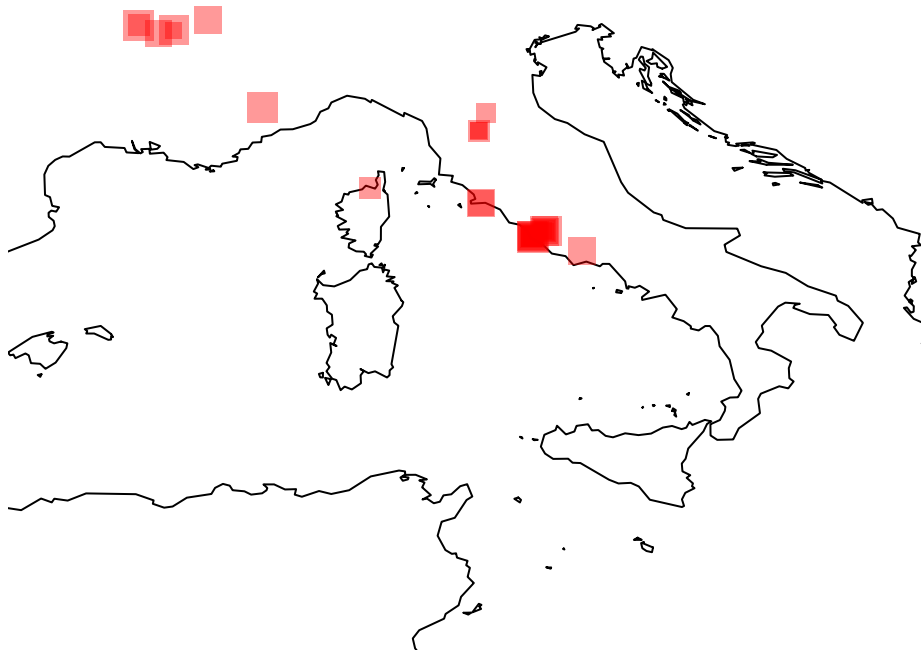



205 cal. AD

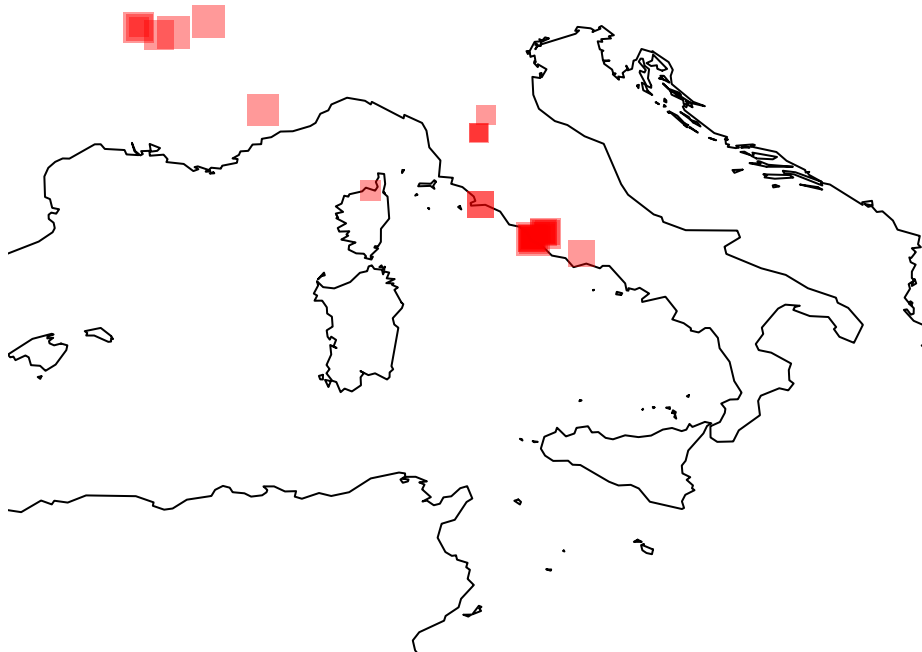

210 cal. AD

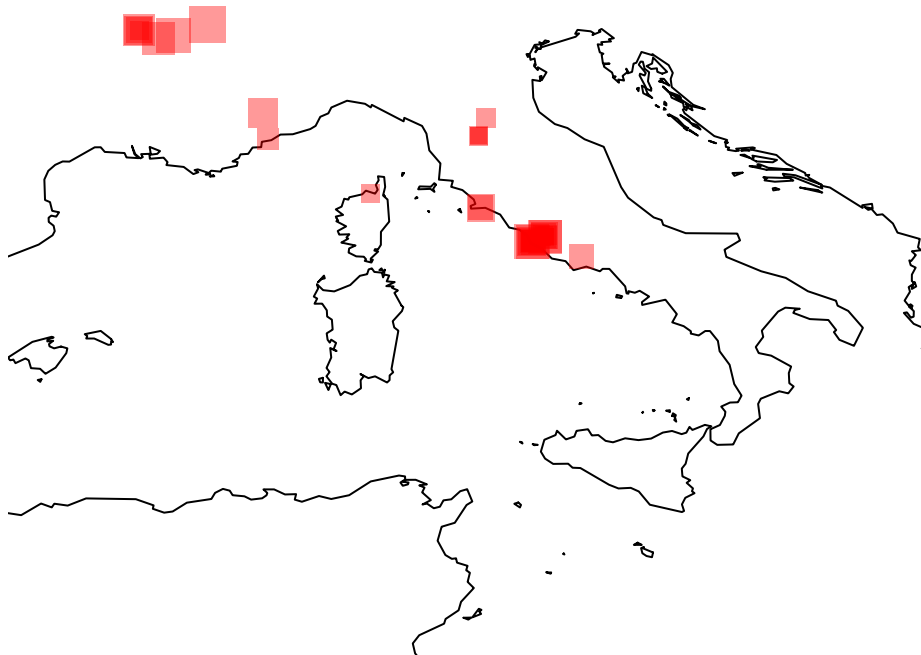

215 cal. AD

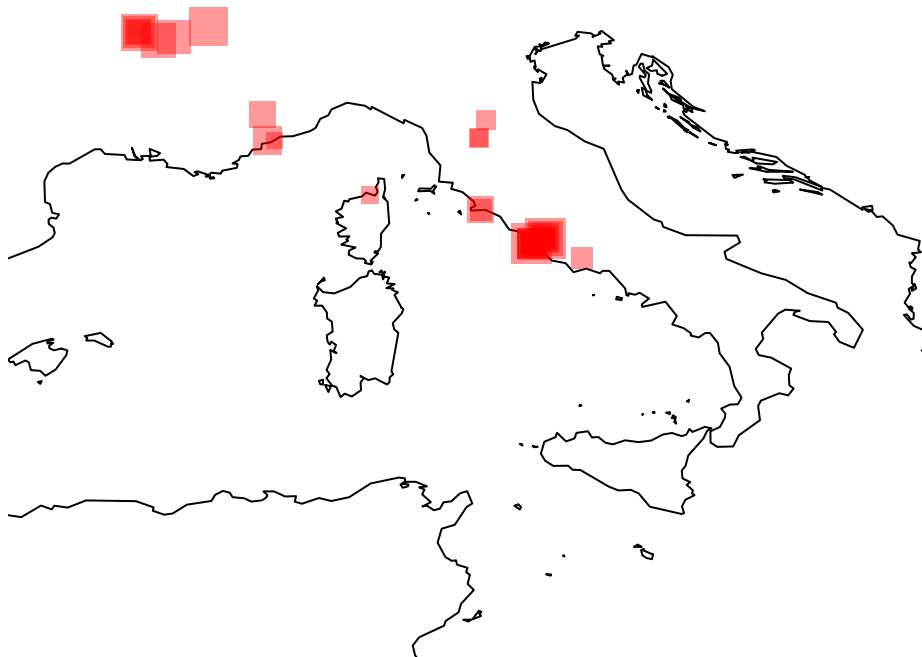

220 cal. AD

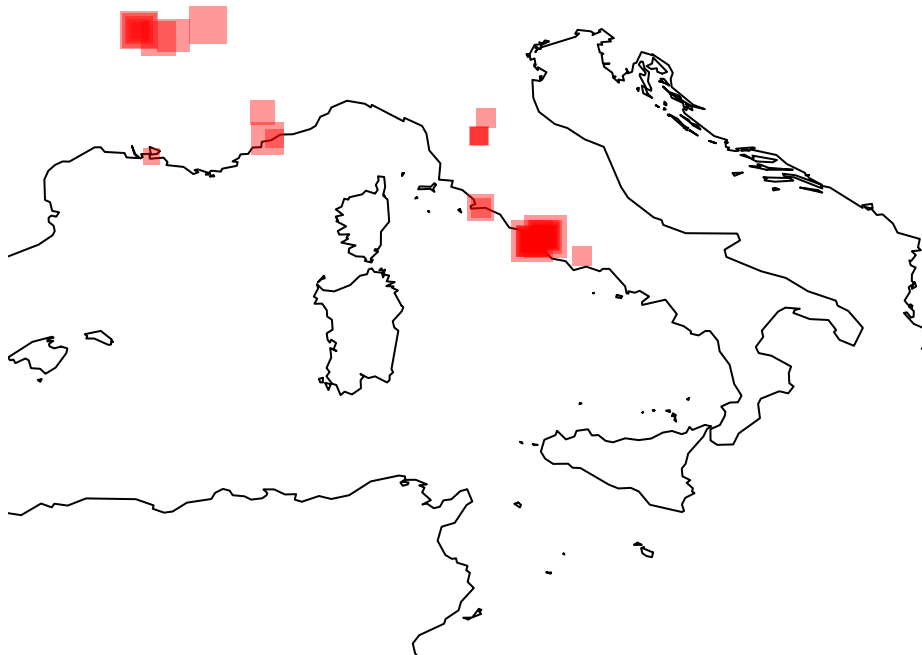

225 cal. AD

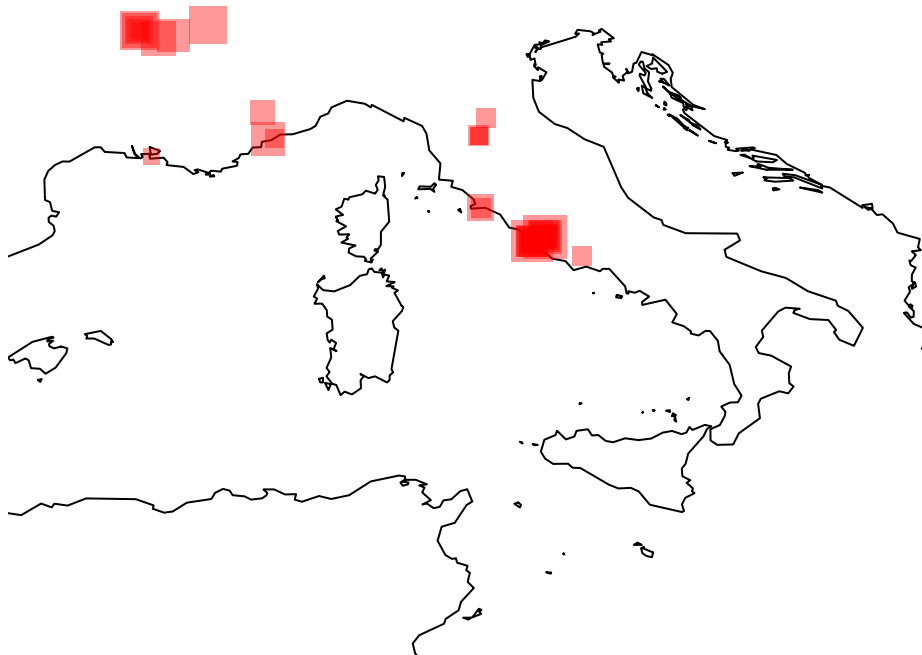

230 cal. AD

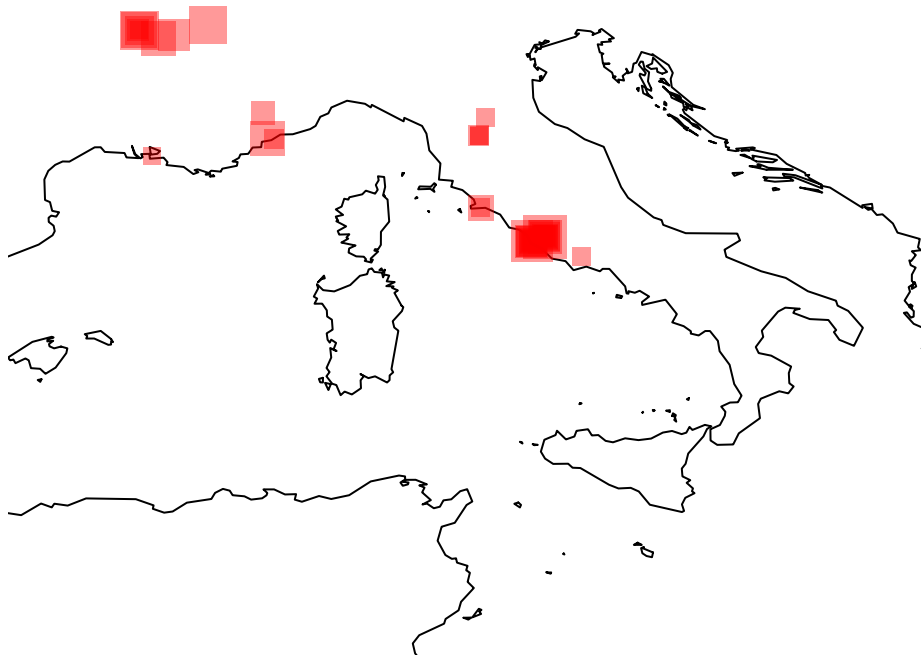



235 cal. AD

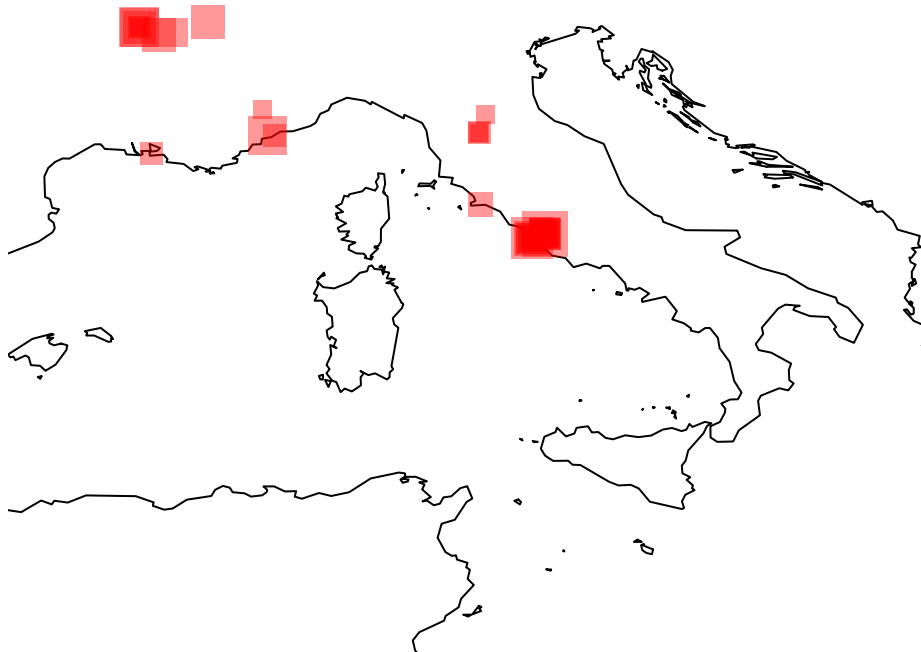

240 cal. AD

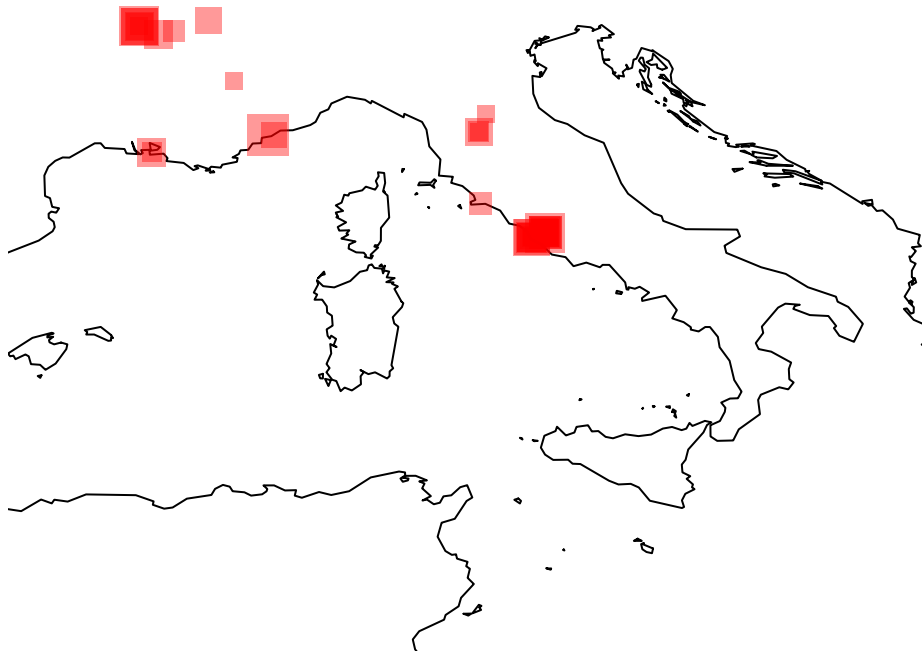

245 cal. AD

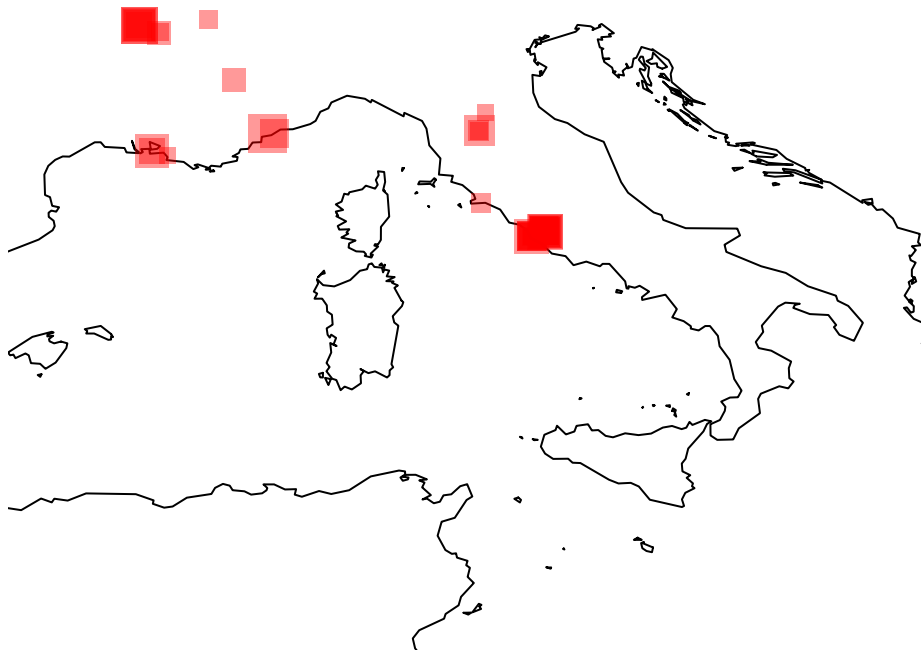

250 cal. AD

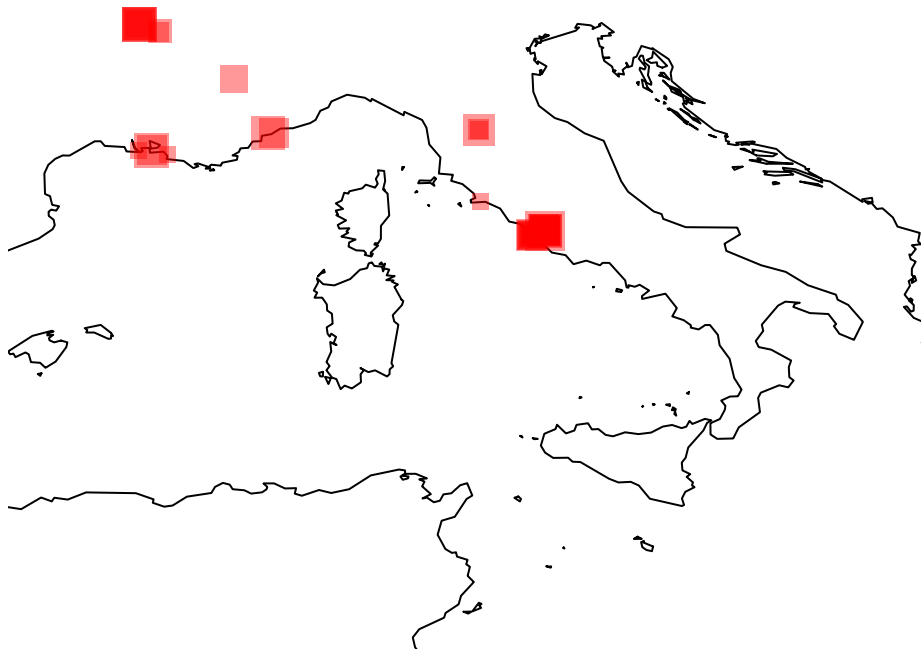

255 cal. AD

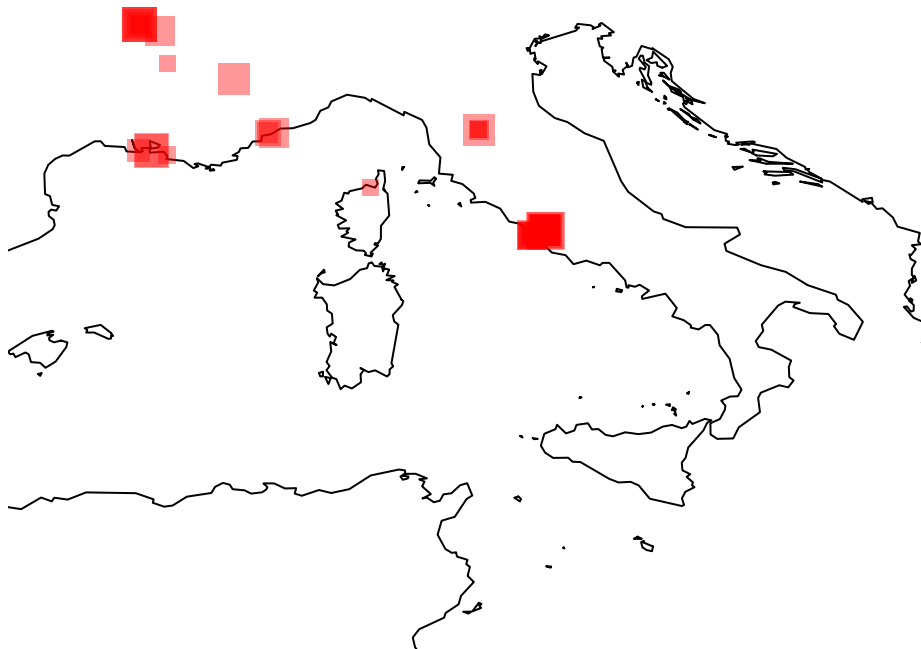

260 cal. AD

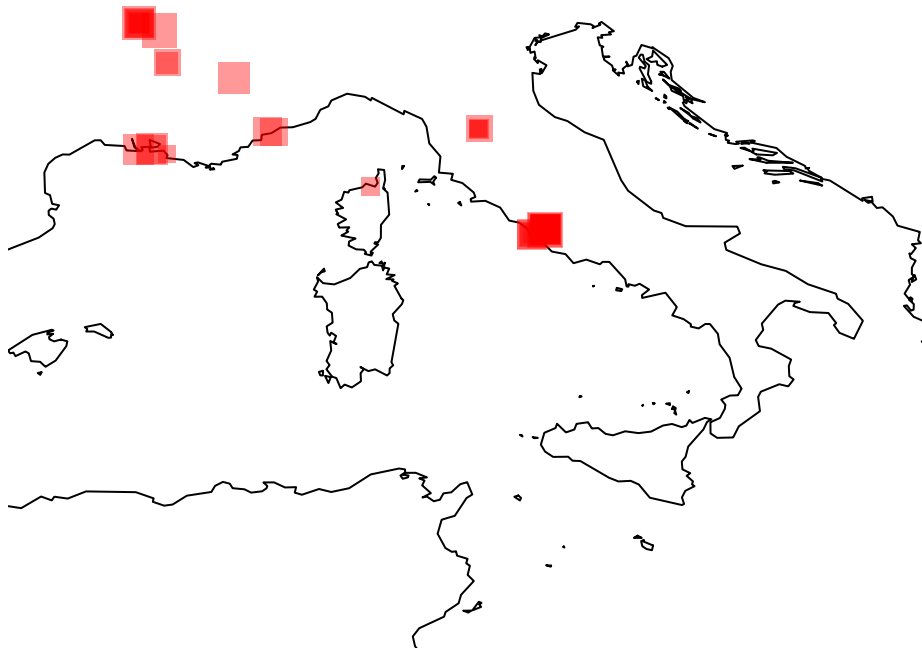

265 cal. AD

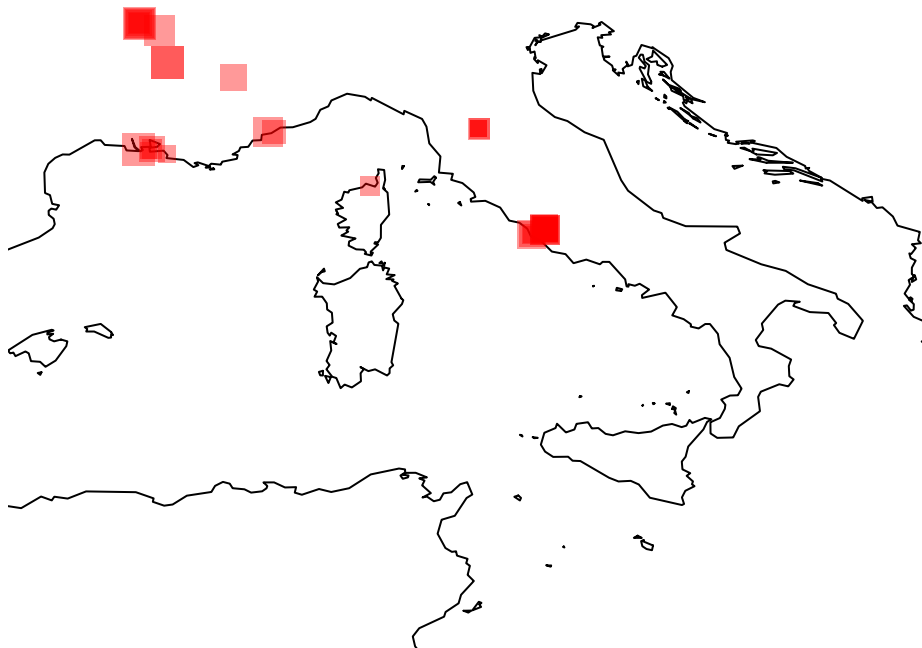

270 cal. AD

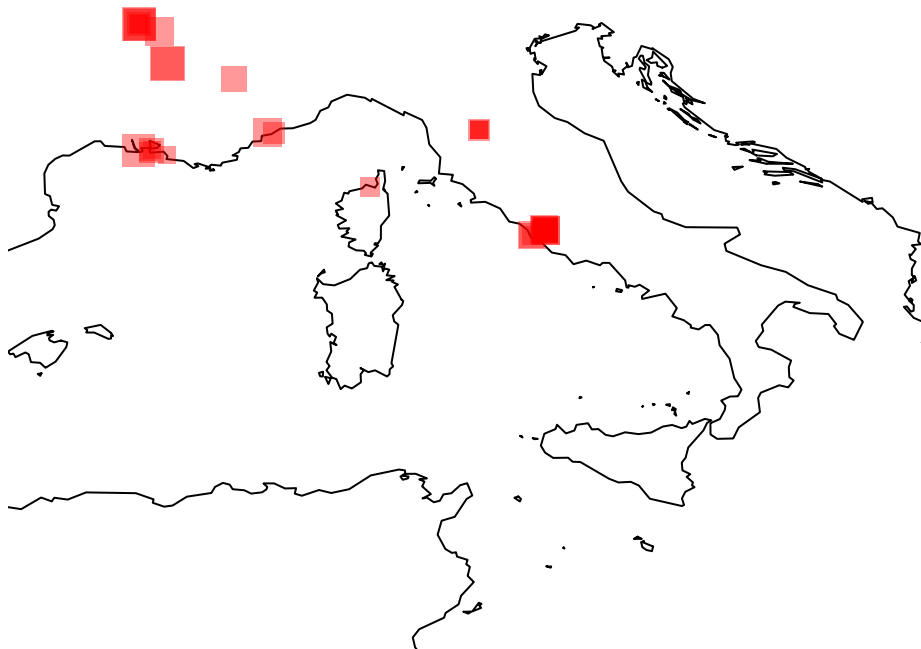



275 cal. AD

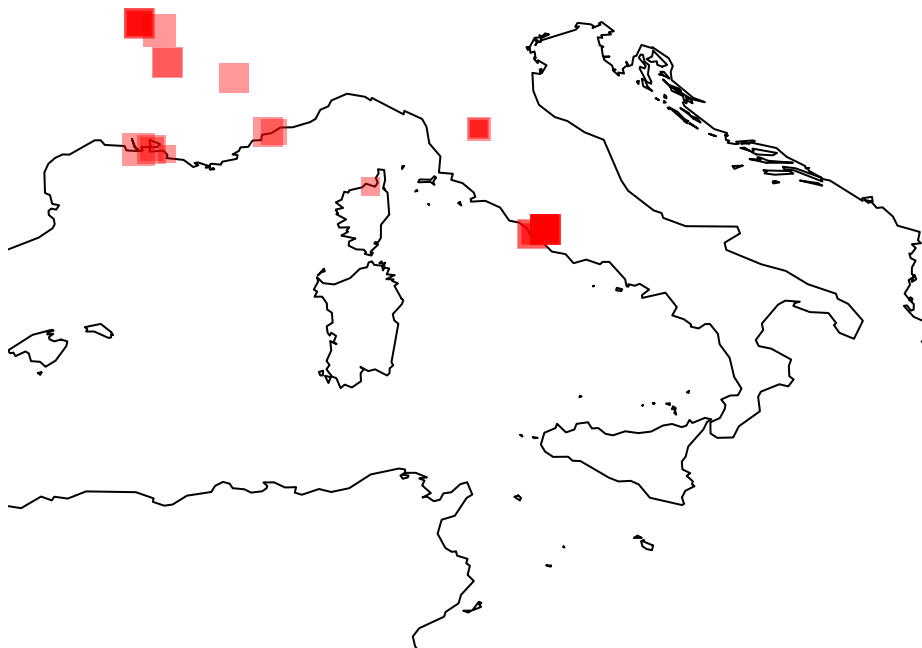

280 cal. AD

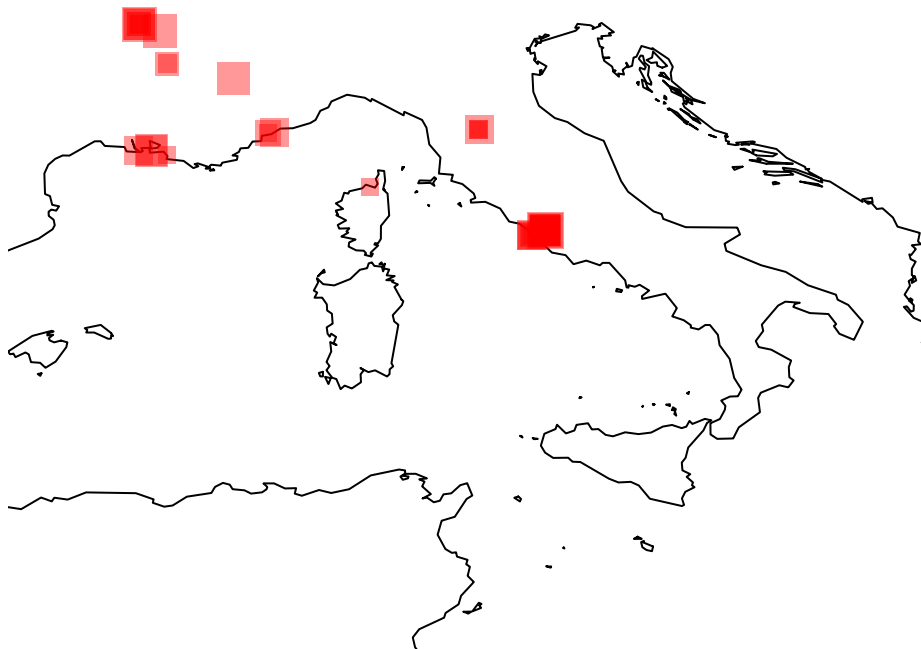

285 cal. AD

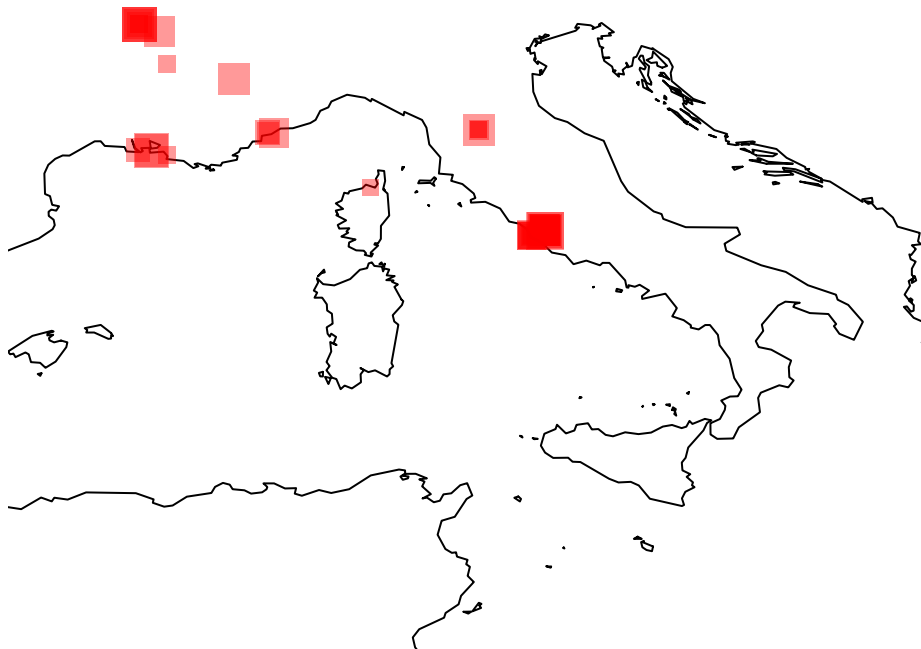

290 cal. AD

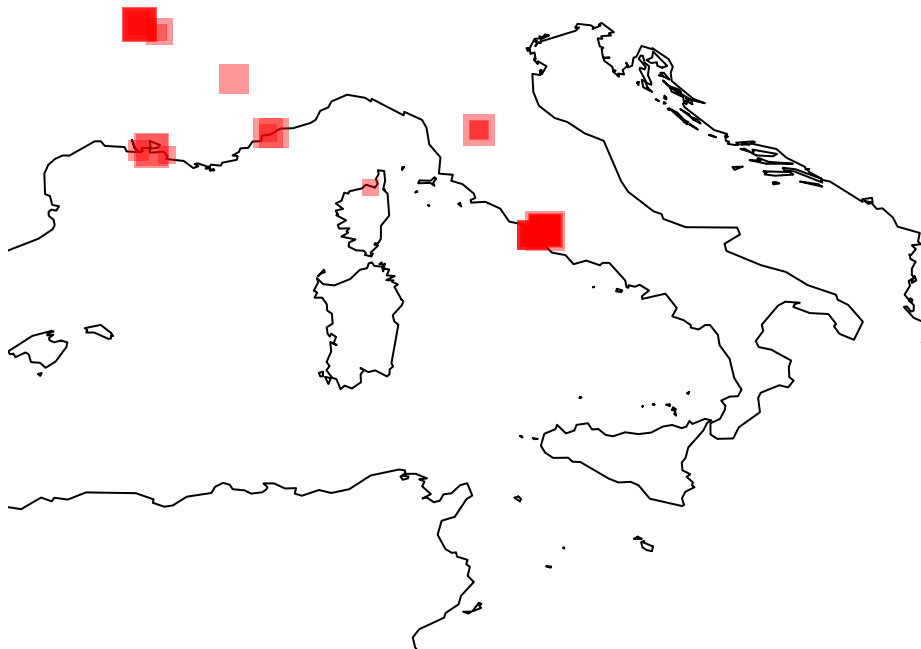

295 cal. AD





305 cal. AD

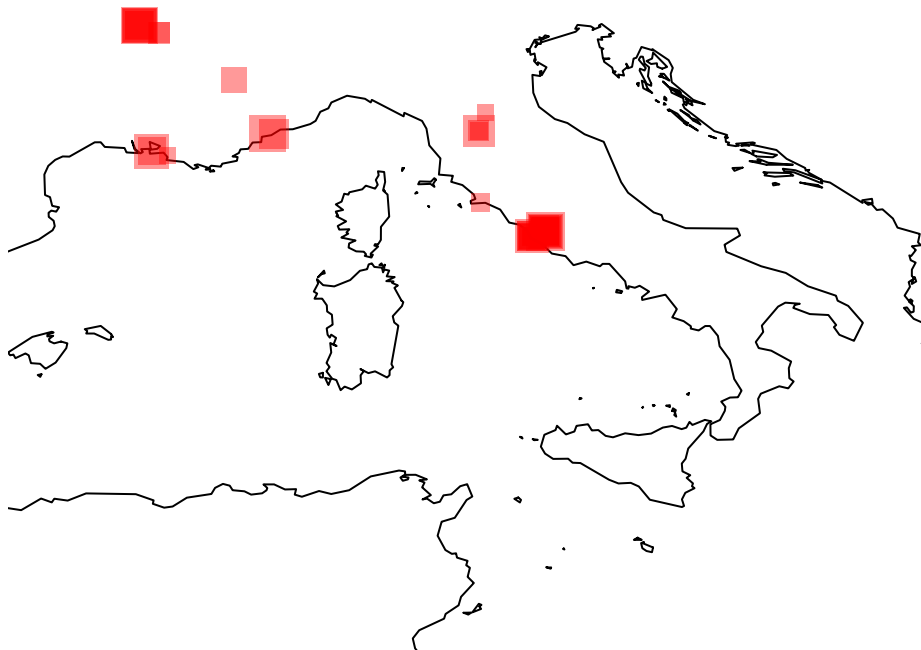

310 cal. AD





315 cal. AD

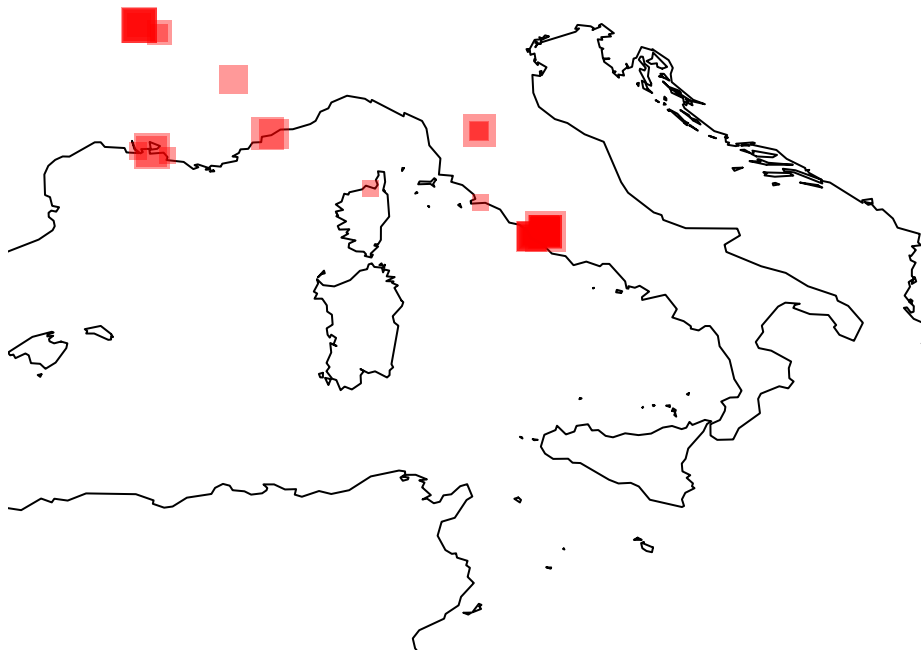

320 cal. AD

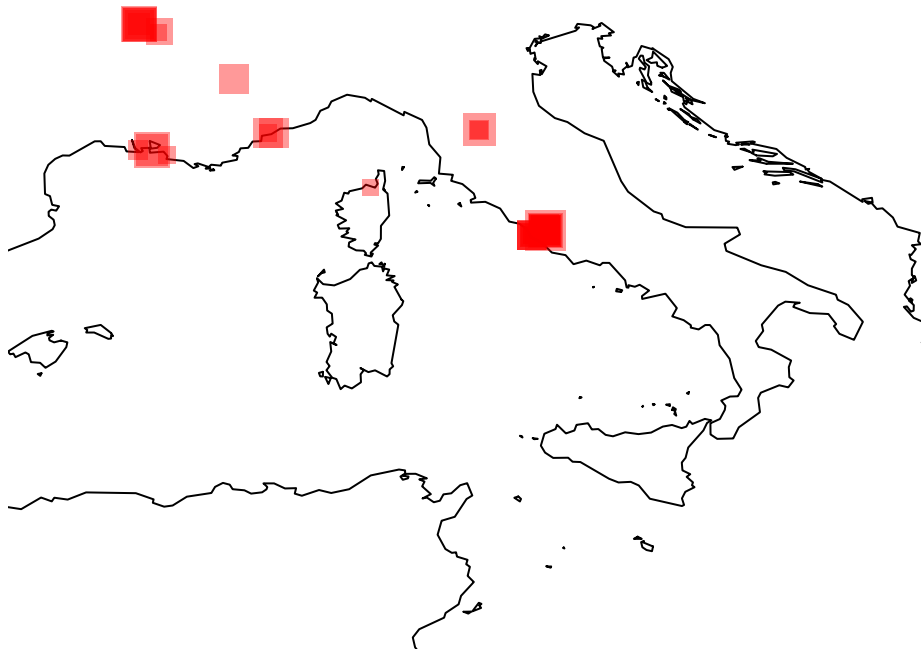

325 cal. AD

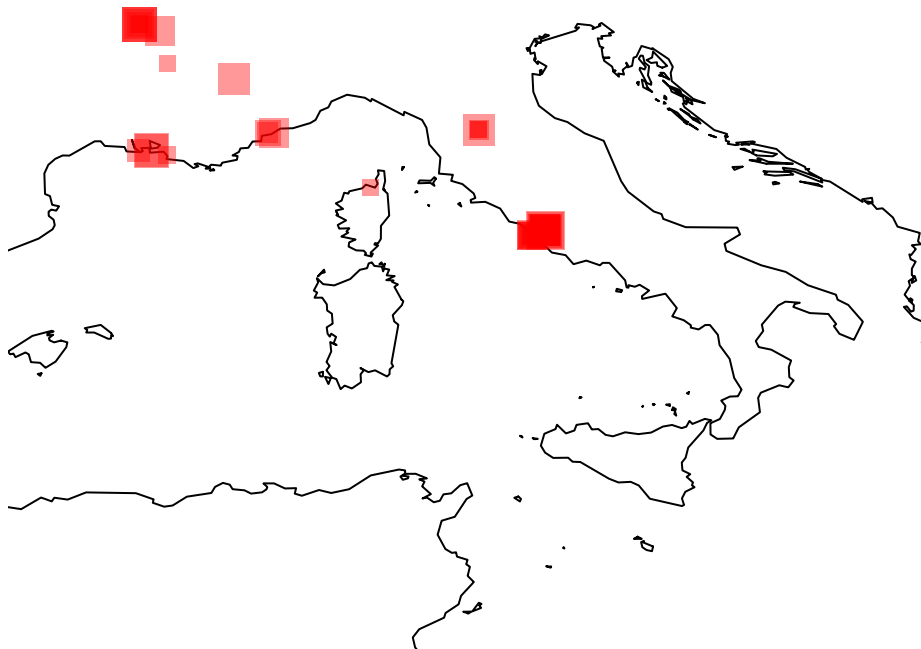





340 cal. AD

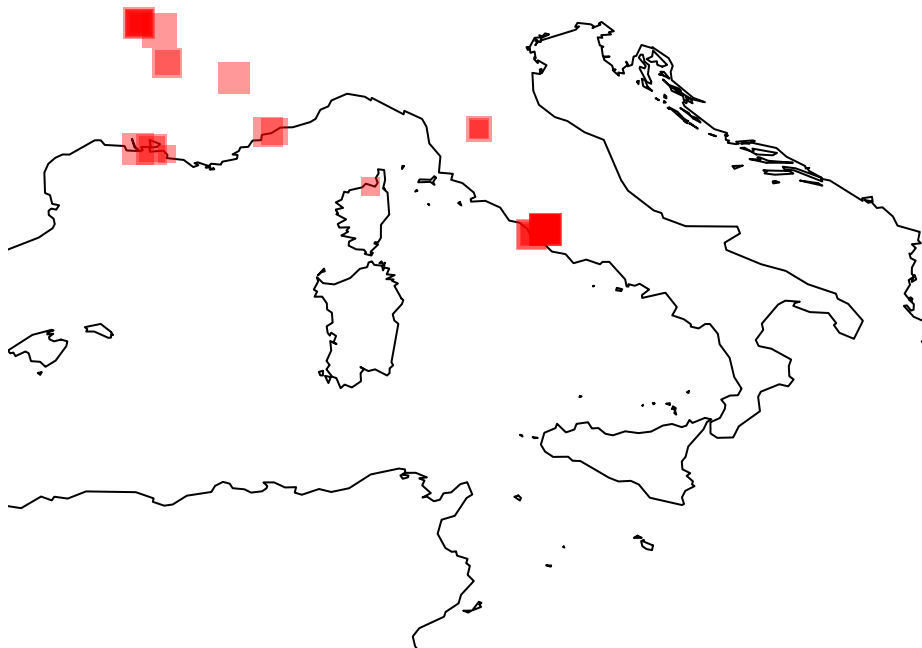

345 cal. AD

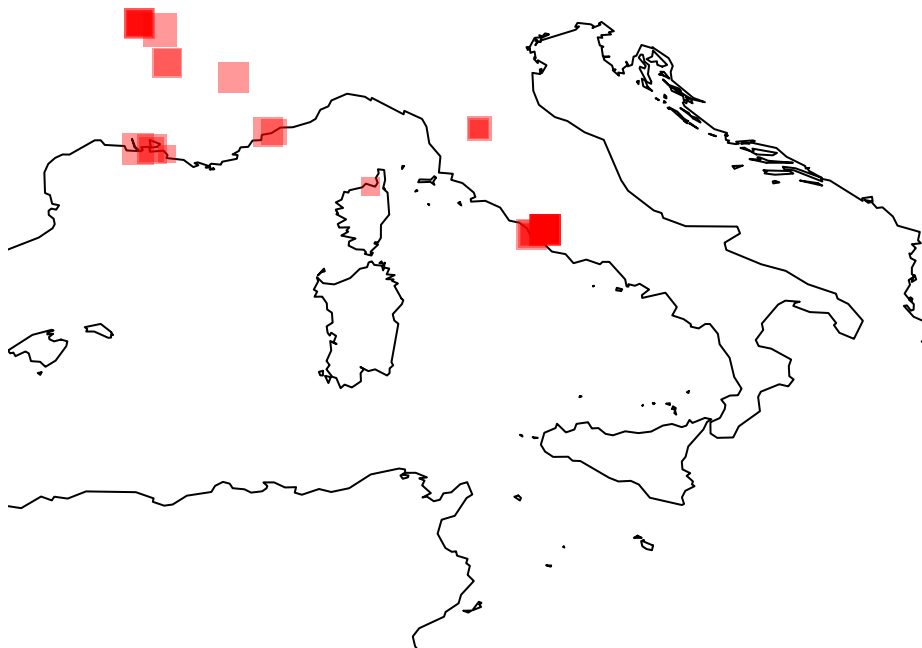

350 cal. AD

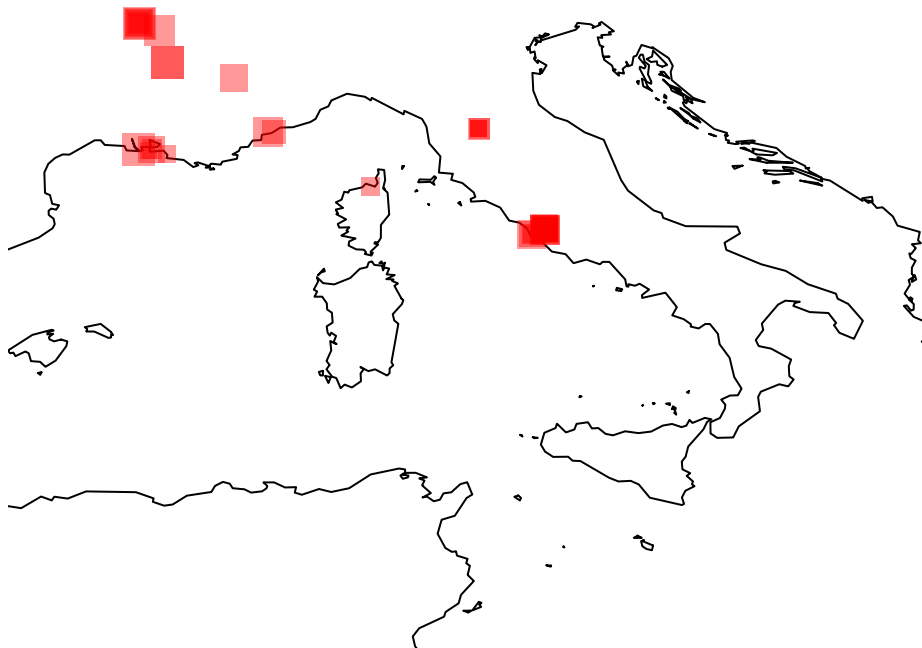



355 cal. AD

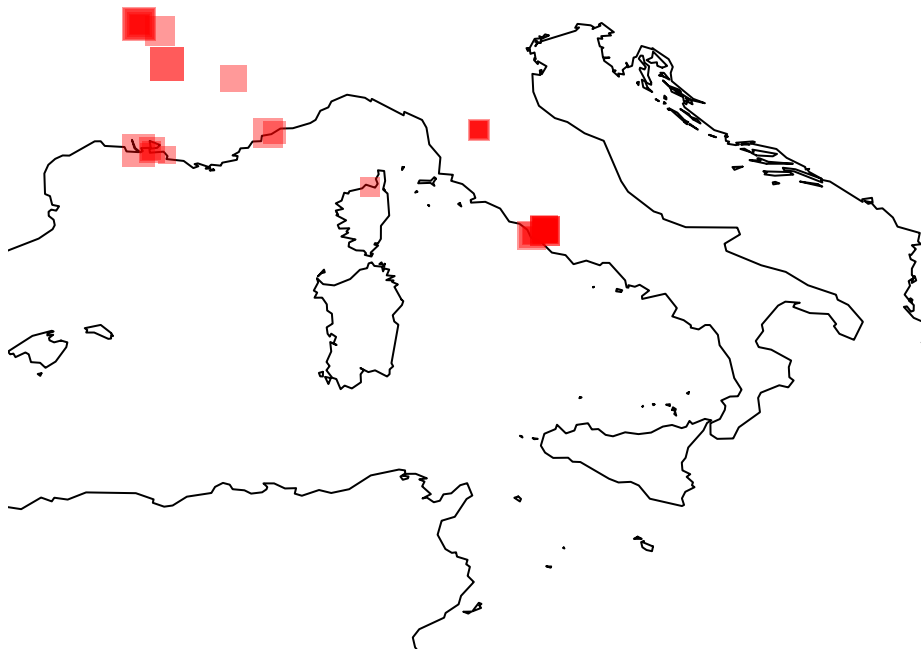

360 cal. AD

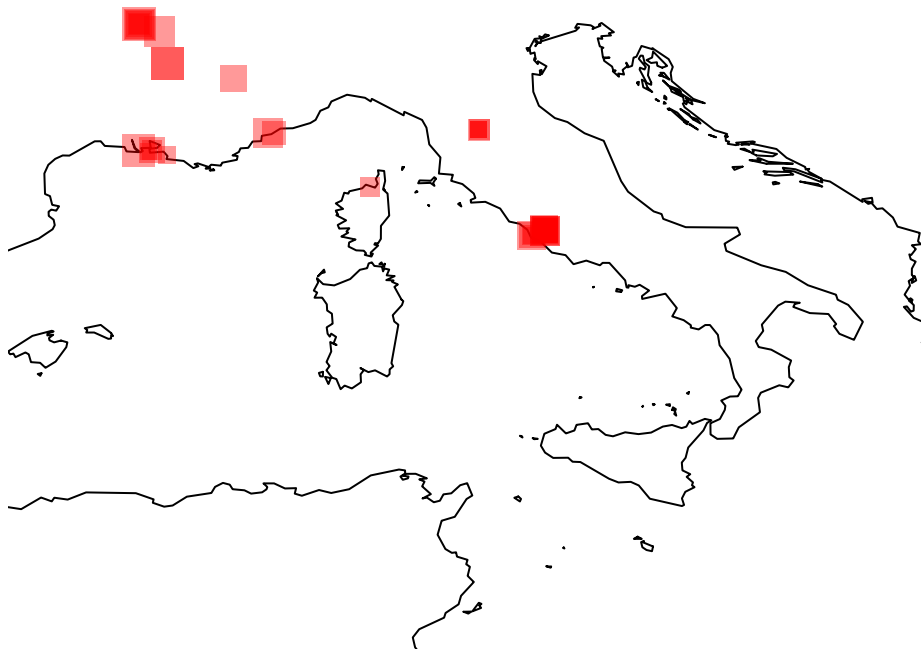

365 cal. AD

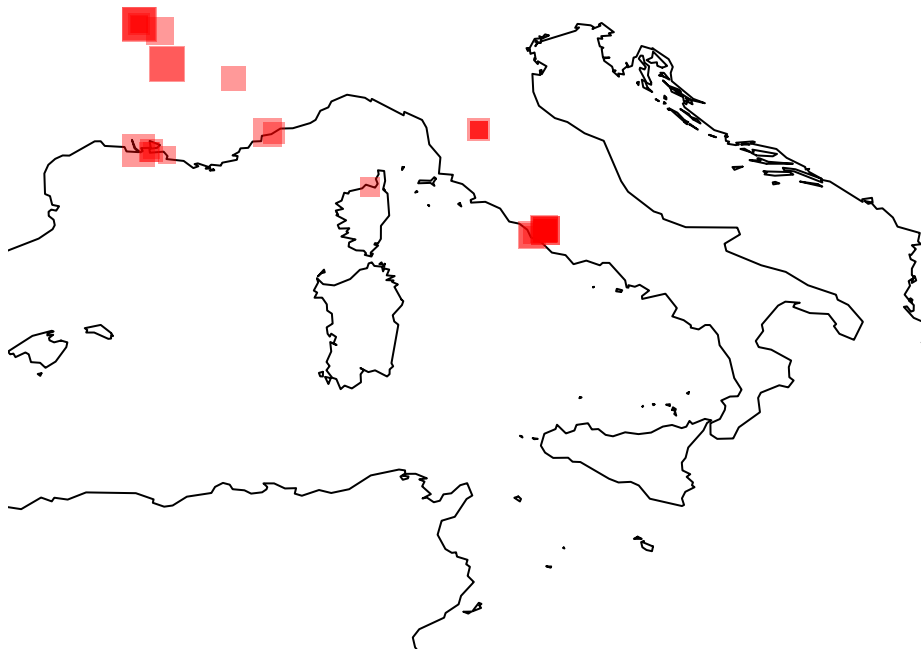

370 cal. AD

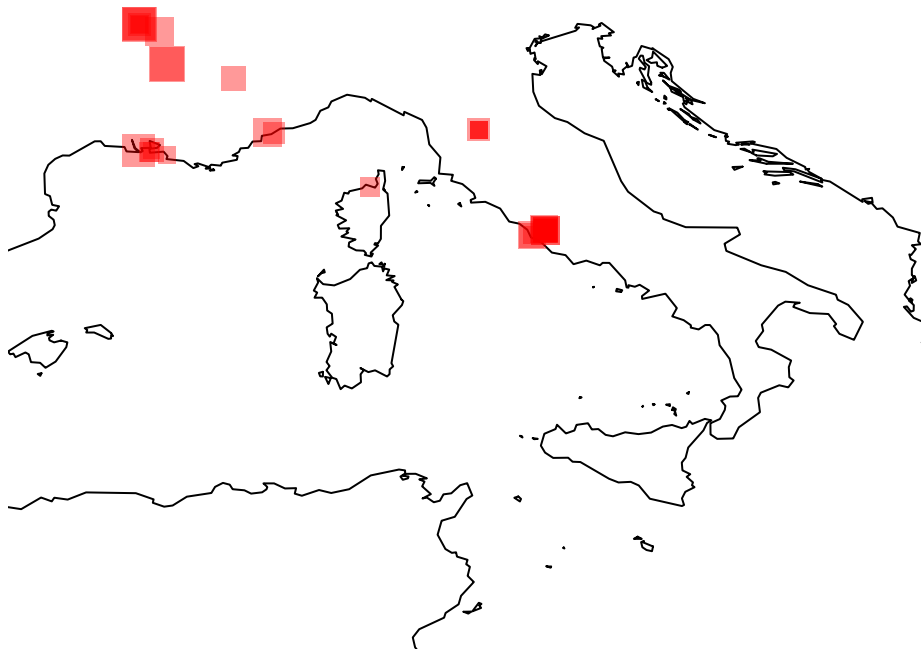

375 cal. AD



380 cal. AD

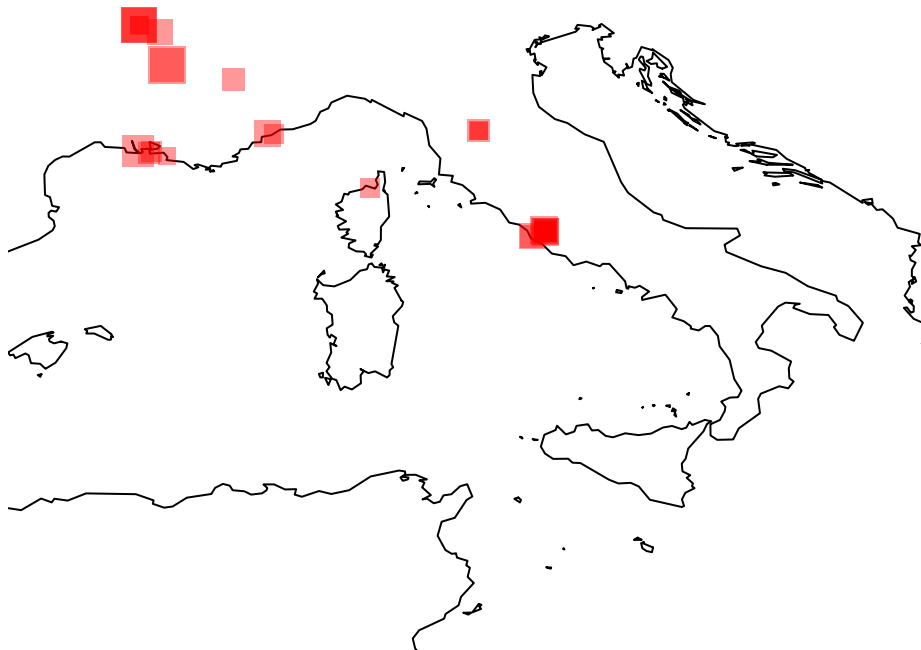



390 cal. AD

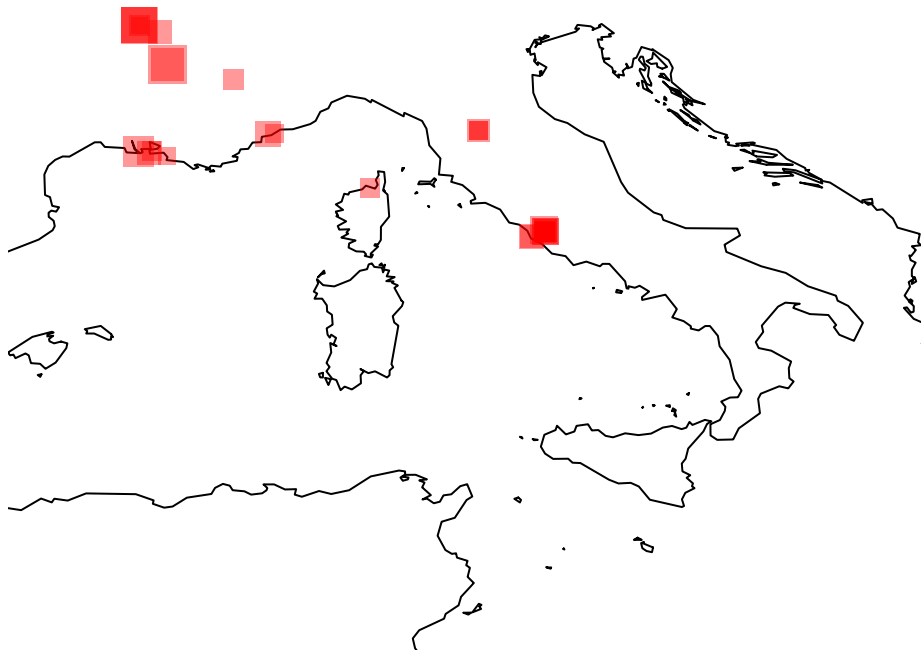





400 cal. AD

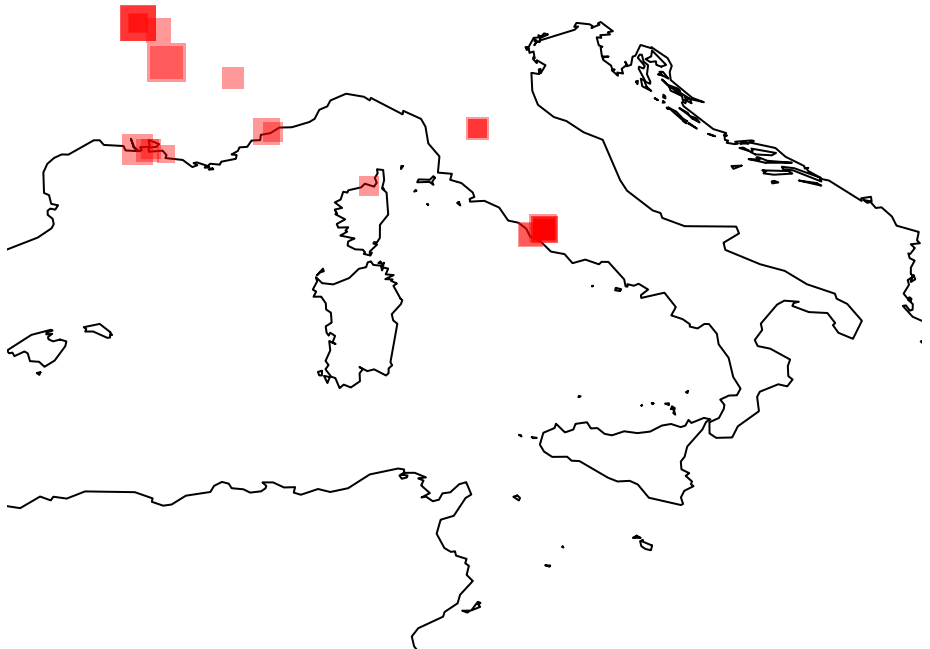





415 cal. AD

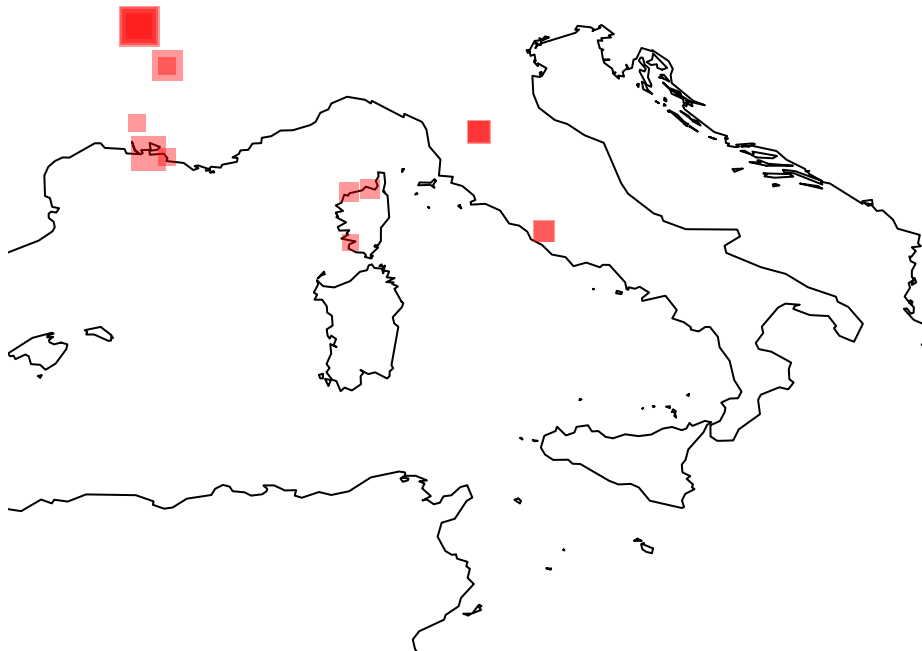



425 cal. AD

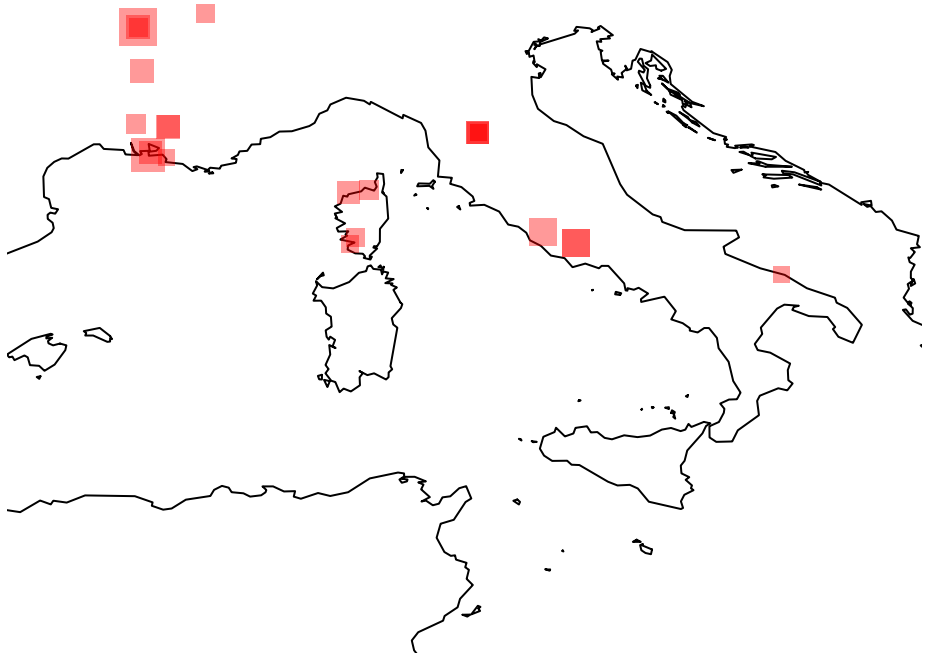

430 cal. AD

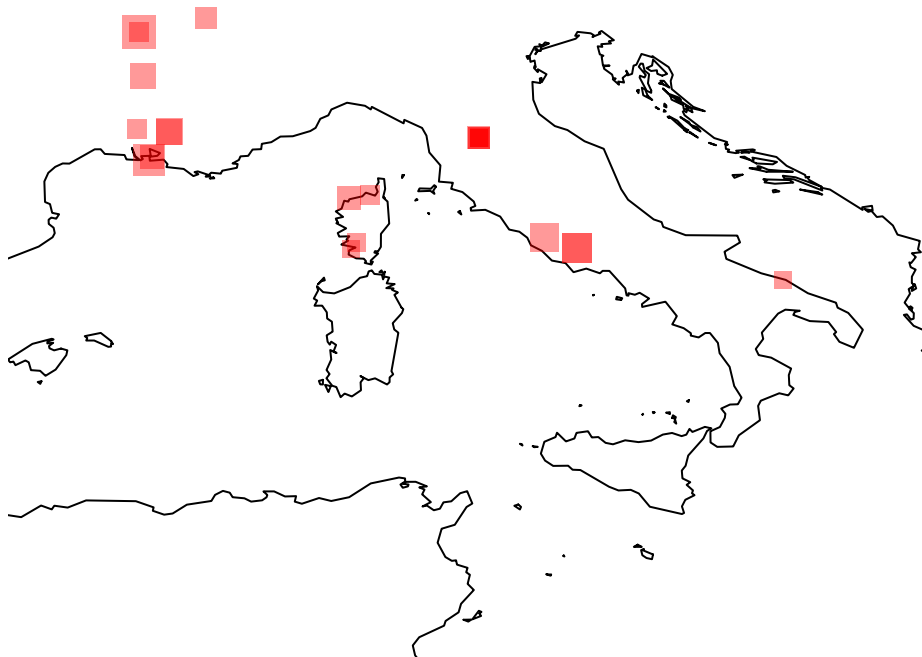



435 cal. AD

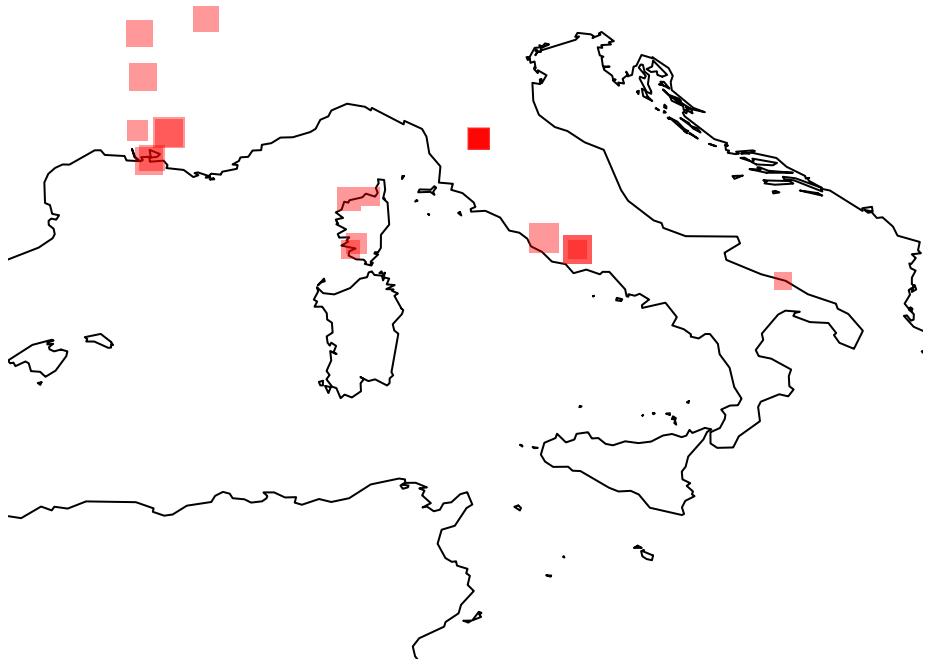

440 cal. AD

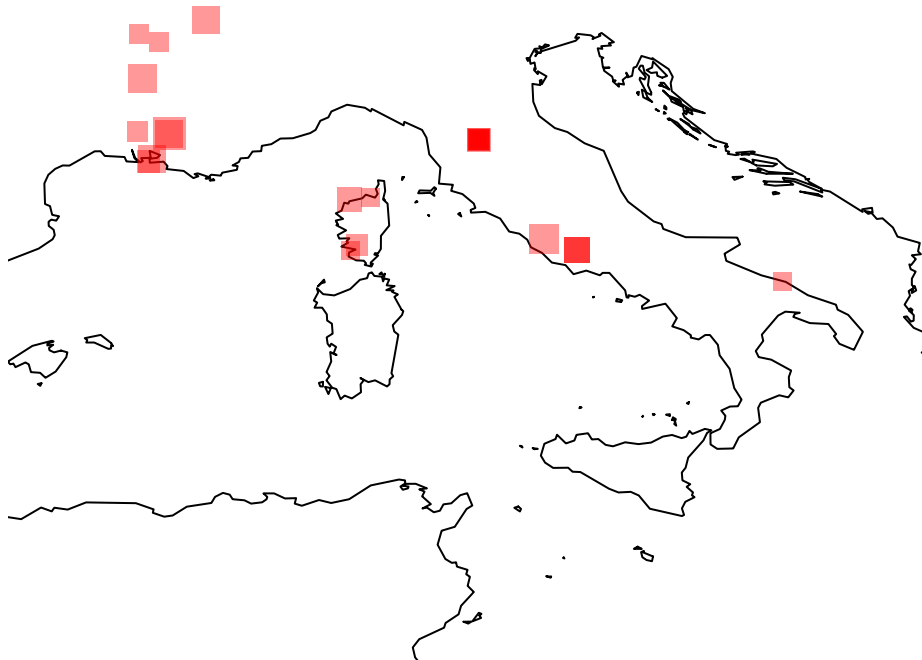

445 cal. AD

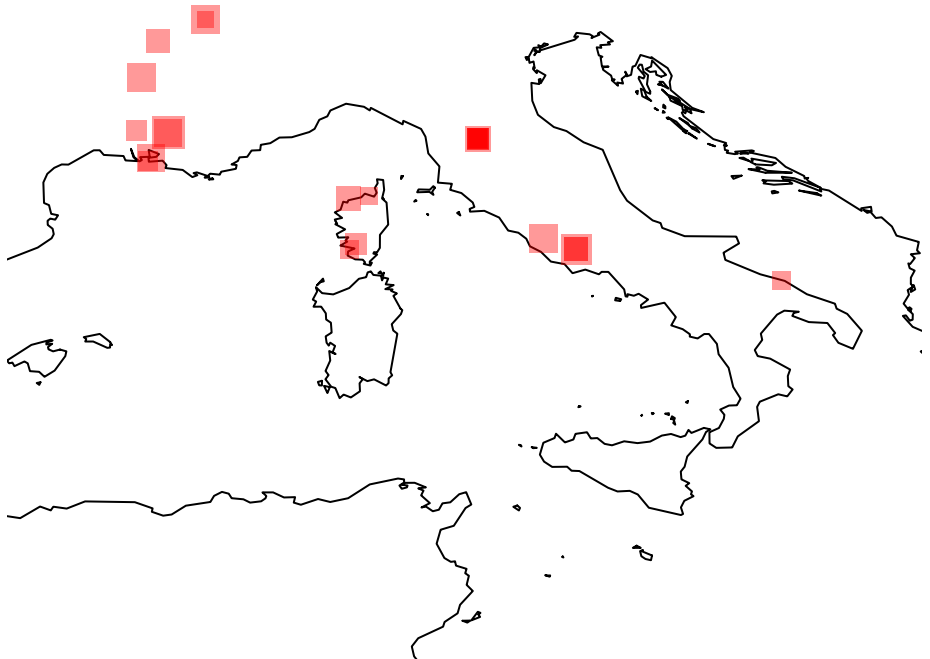

450 cal. AD

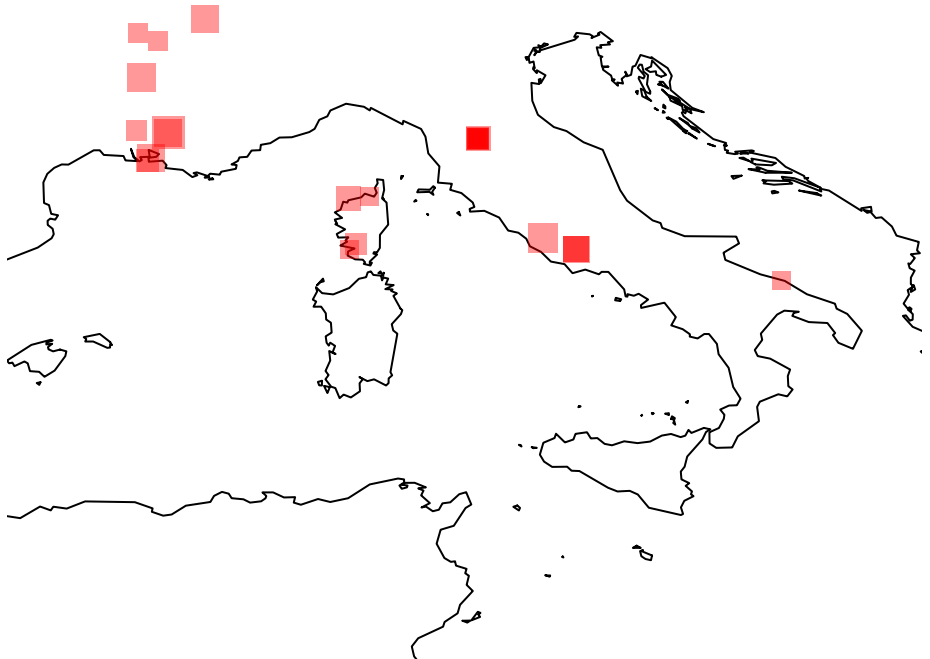

455 cal. AD

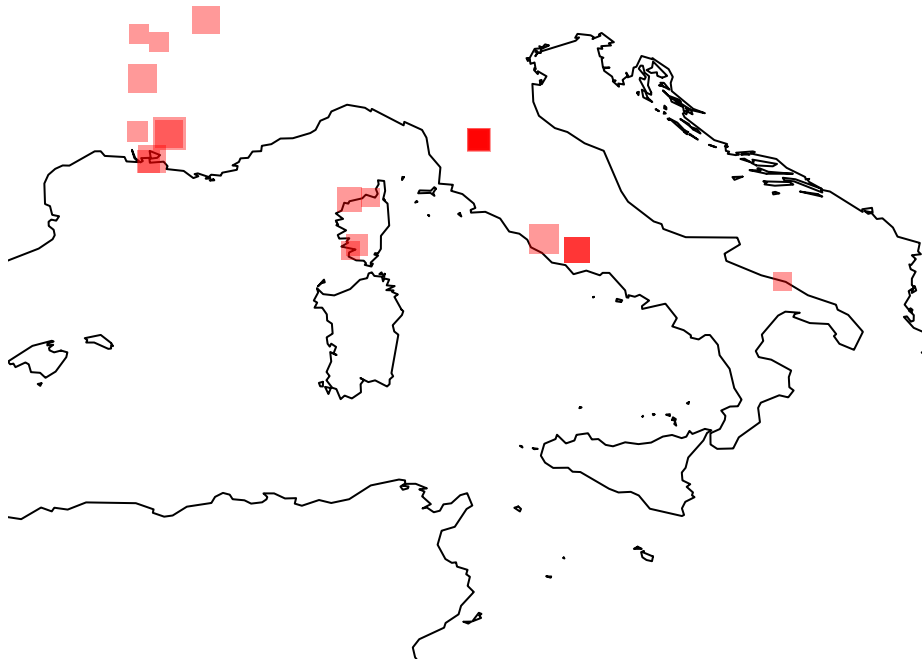

460 cal. AD

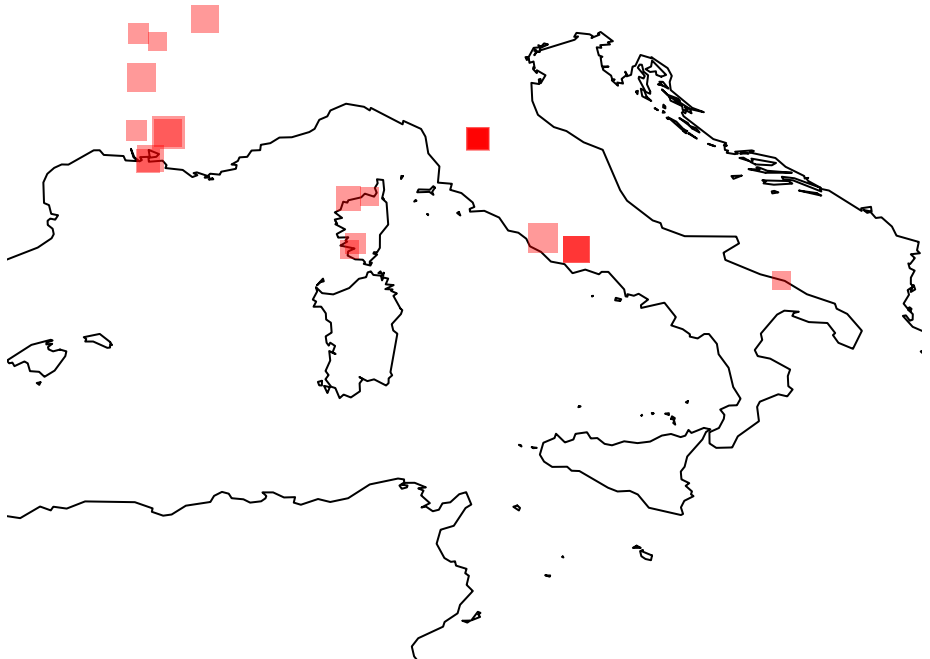

465 cal. AD

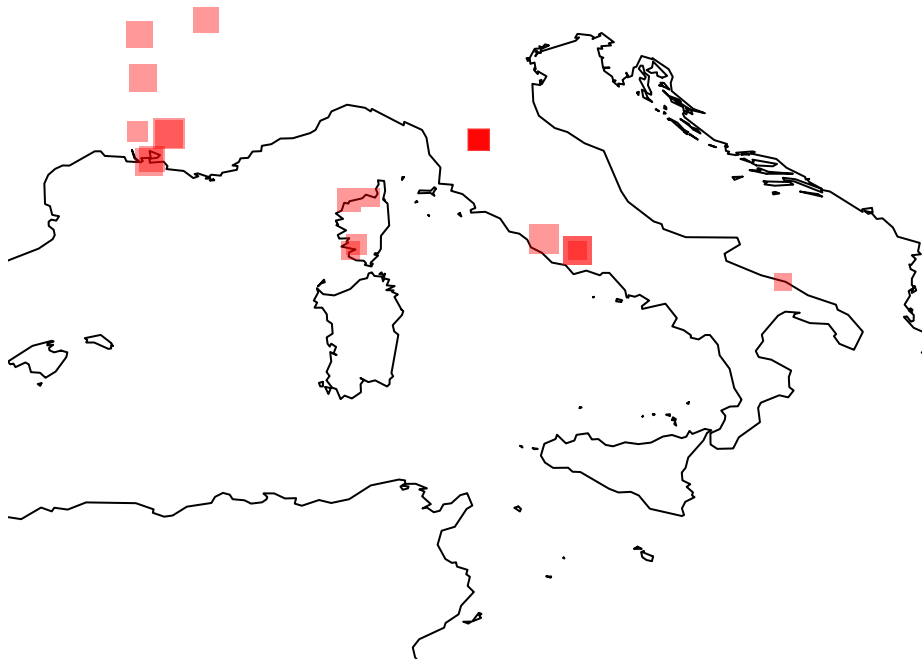





475 cal. AD

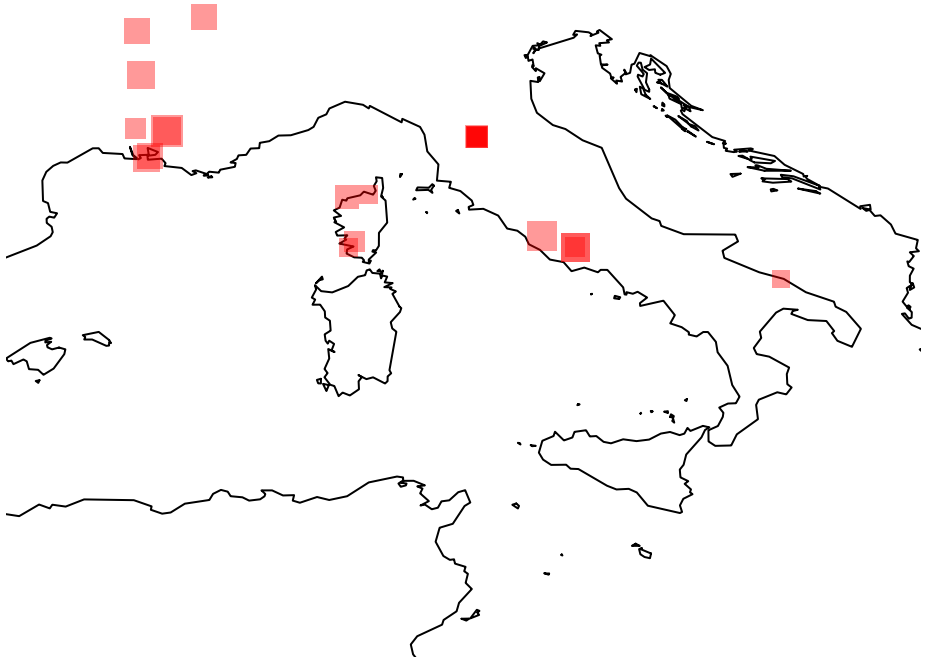

480 cal. AD

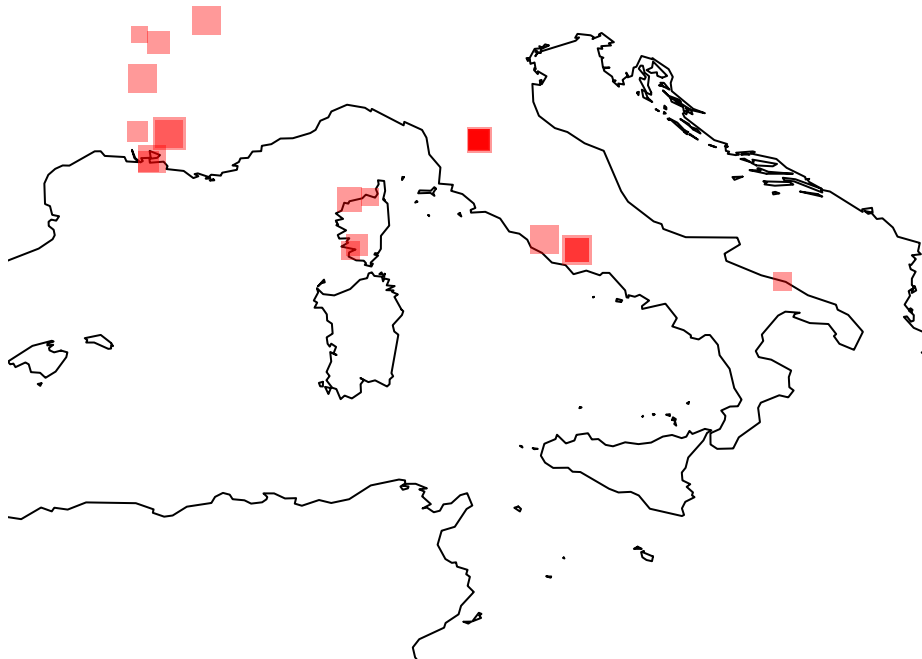

485 cal. AD

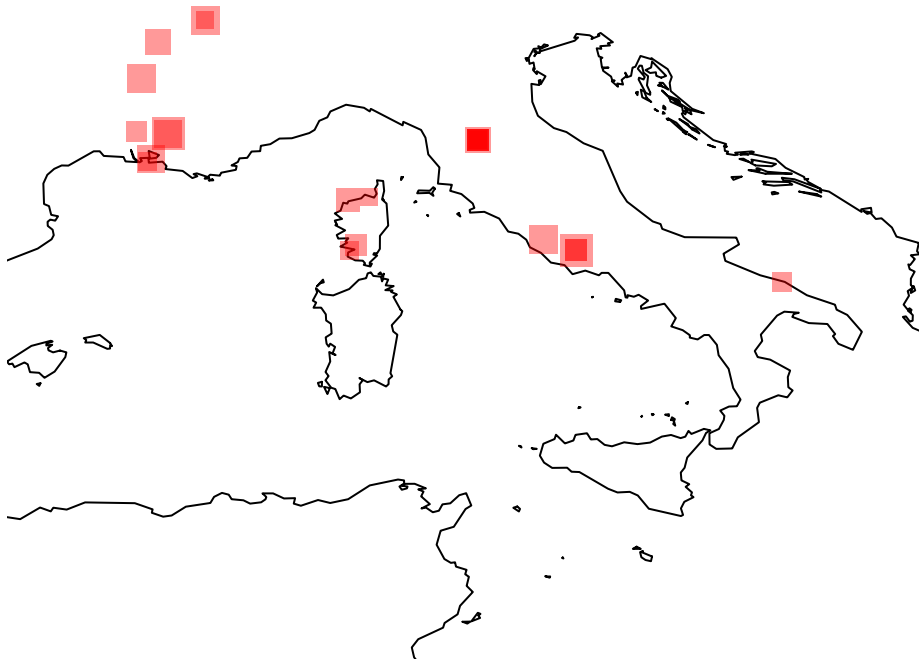

490 cal. AD

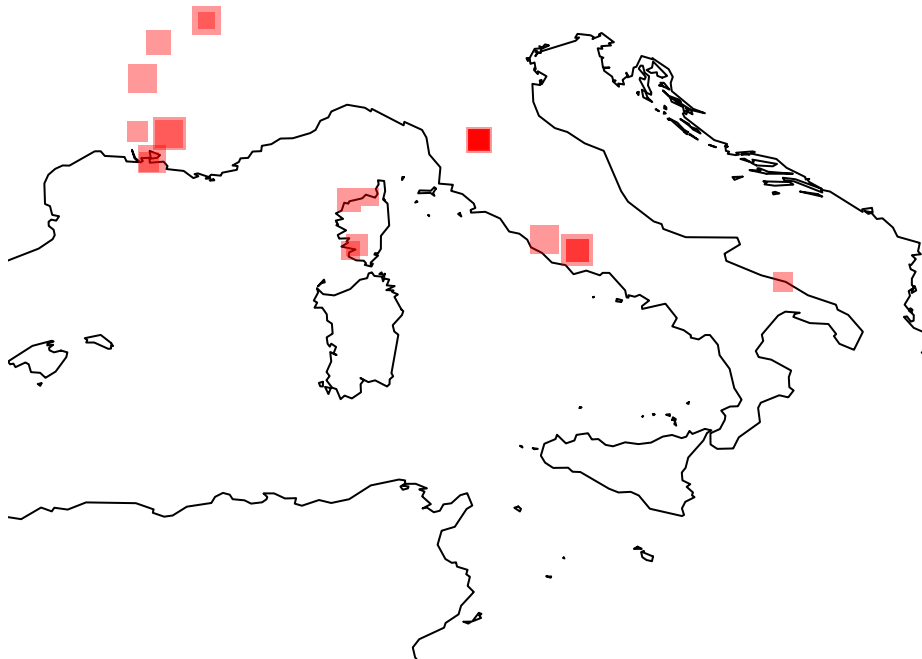

495 cal. AD

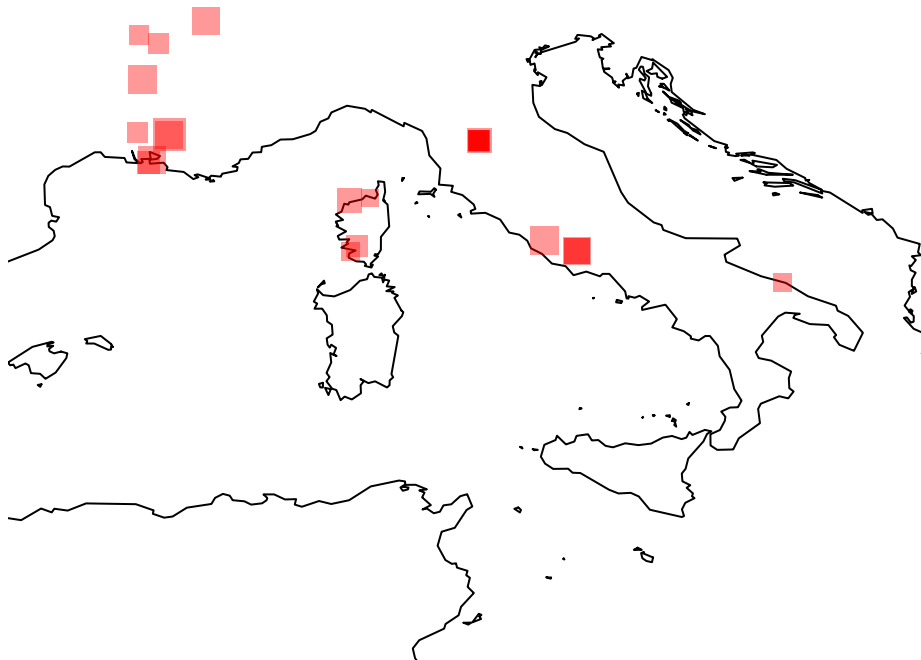

500 cal. AD

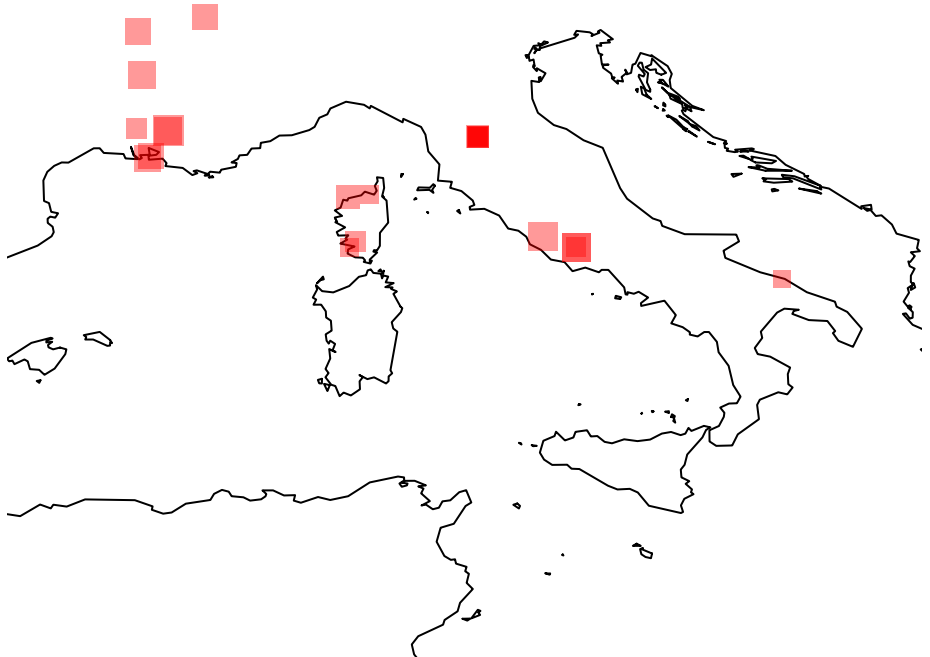

505 cal. AD

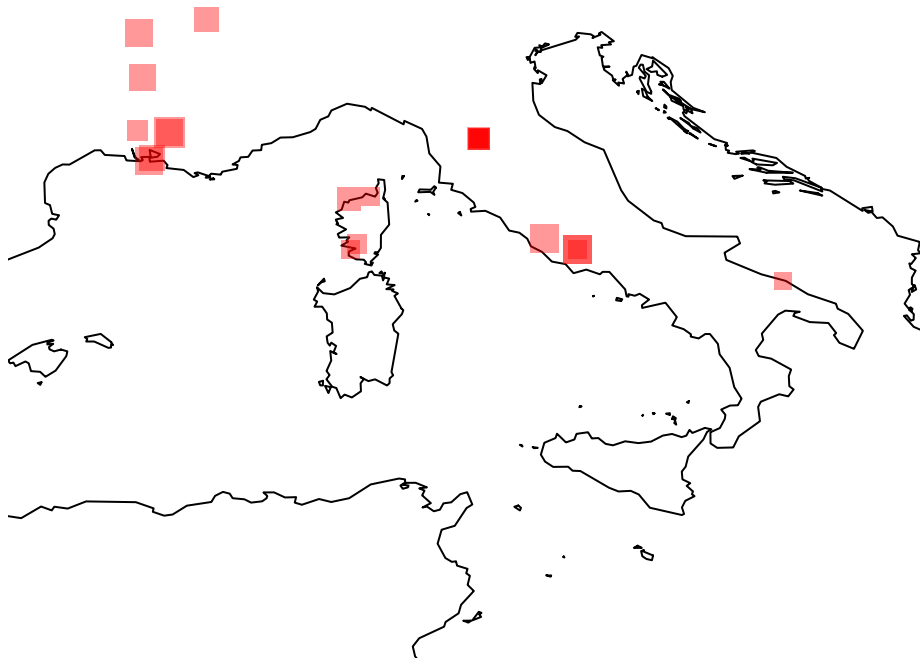

510 cal. AD

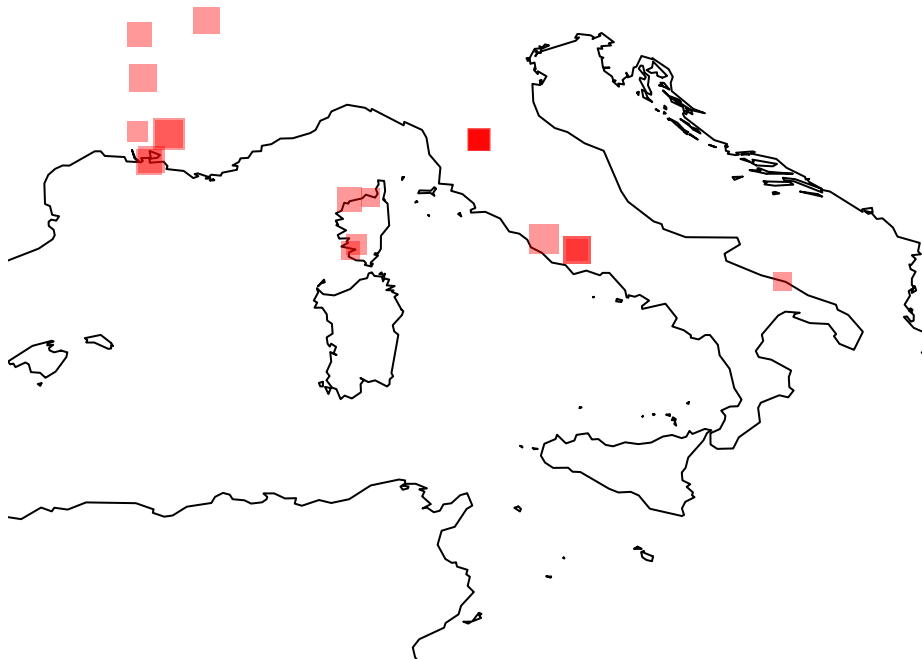



515 cal. AD

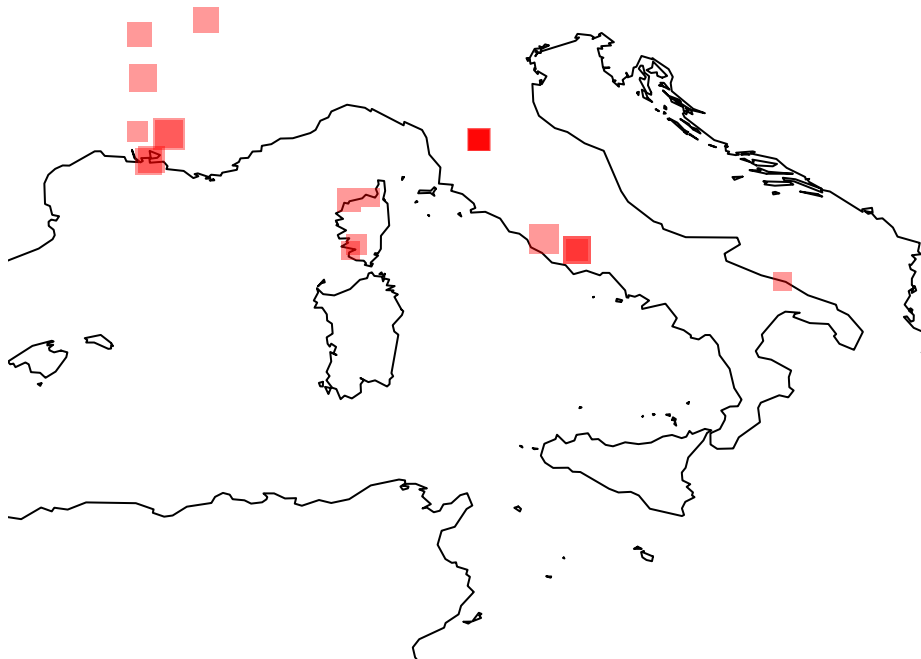

520 cal. AD

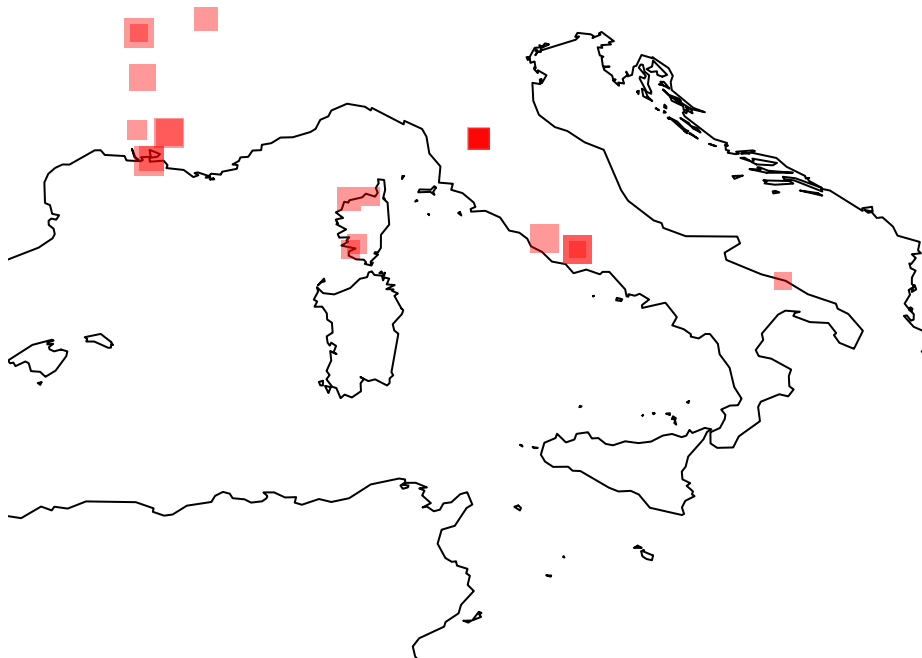



530 cal. AD

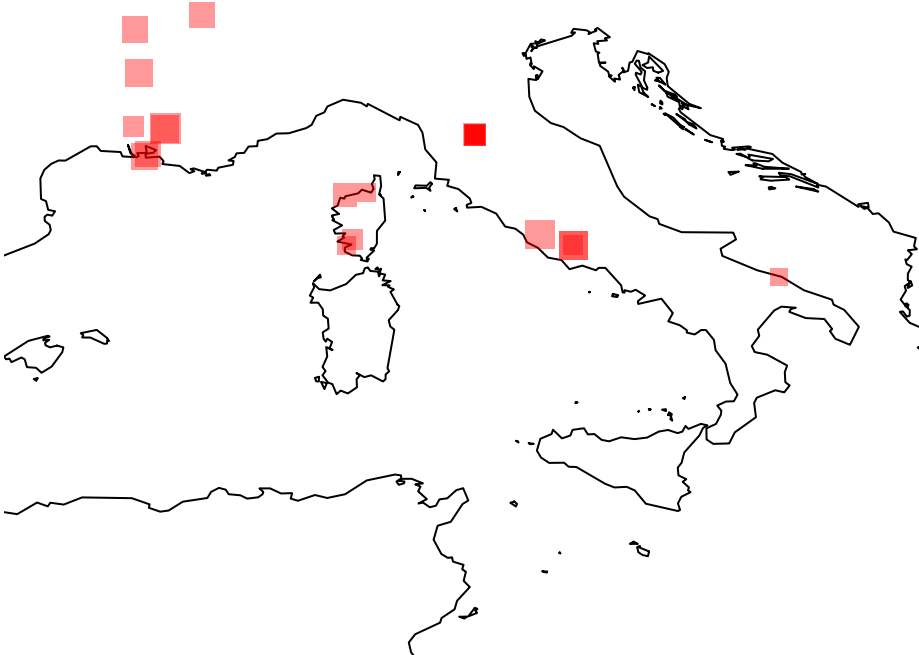

**535 cal. AD**

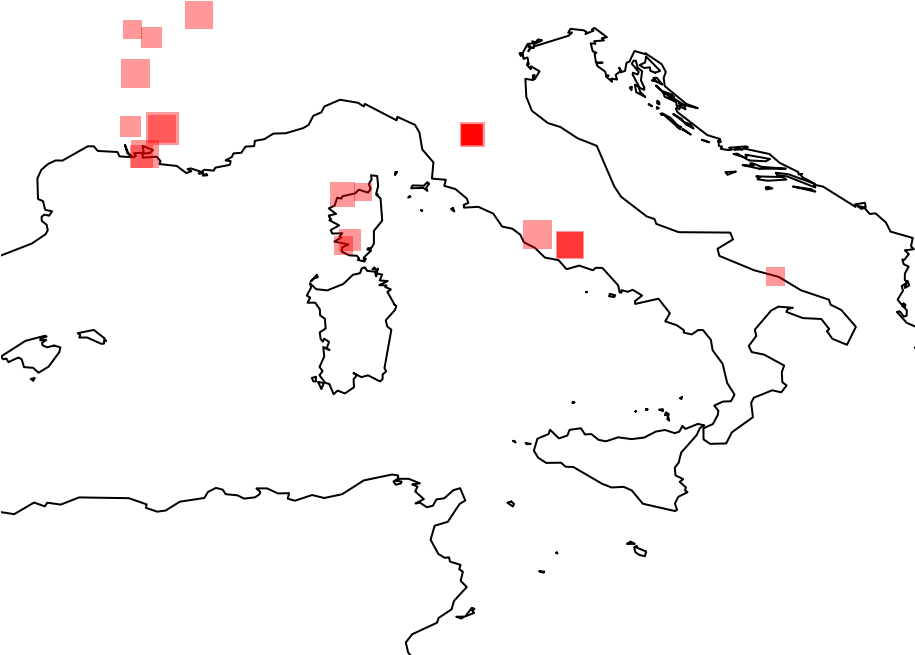



545 cal. AD

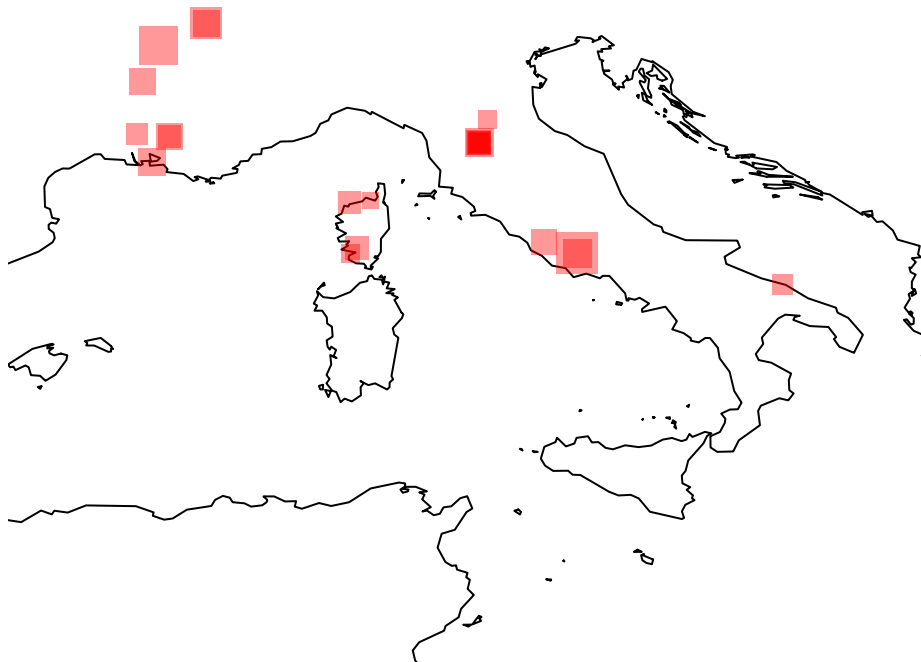

550 cal. AD

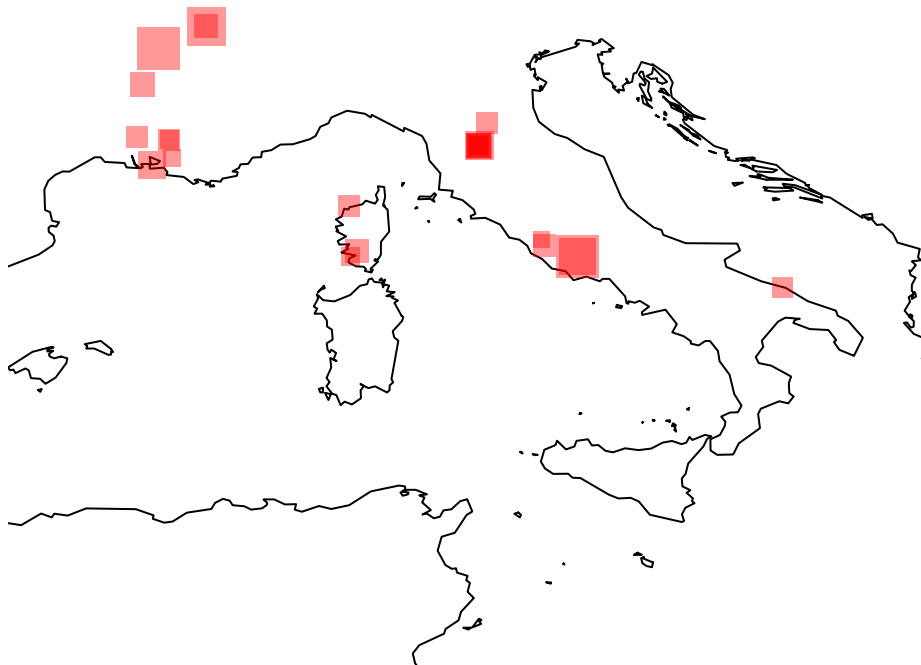



555 cal. AD

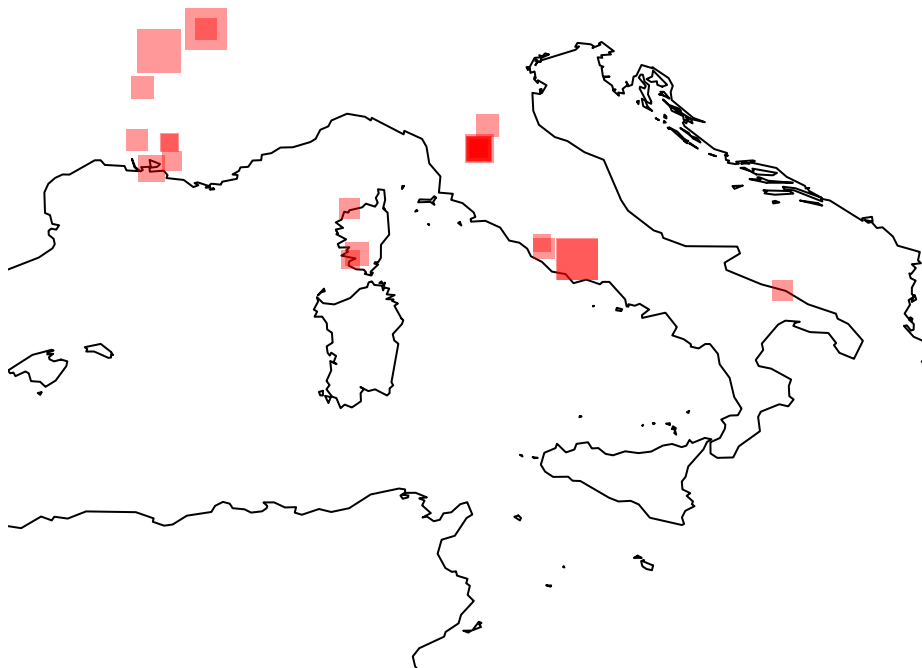

560 cal. AD

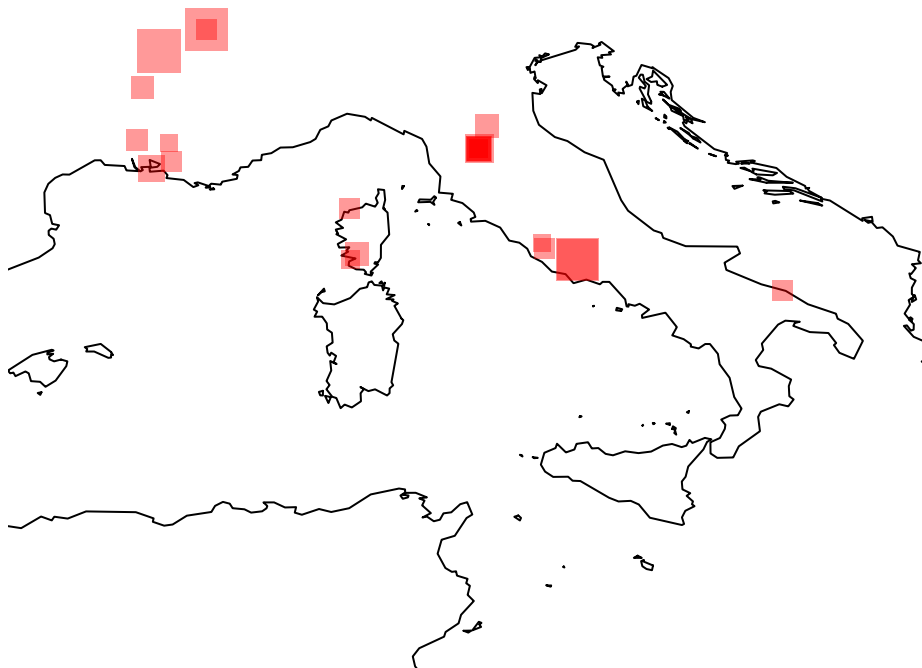

565 cal. AD

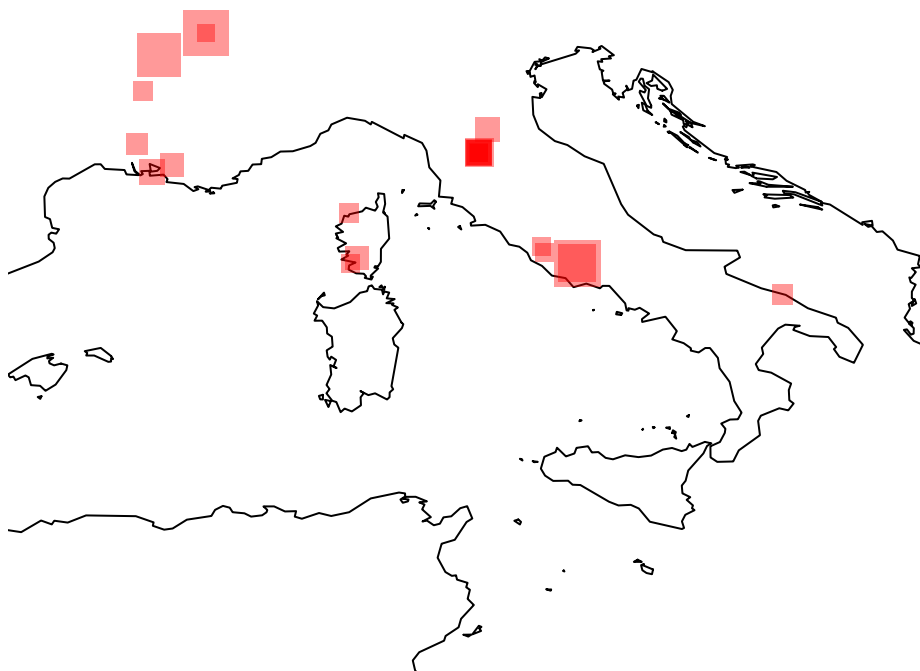



575 cal. AD

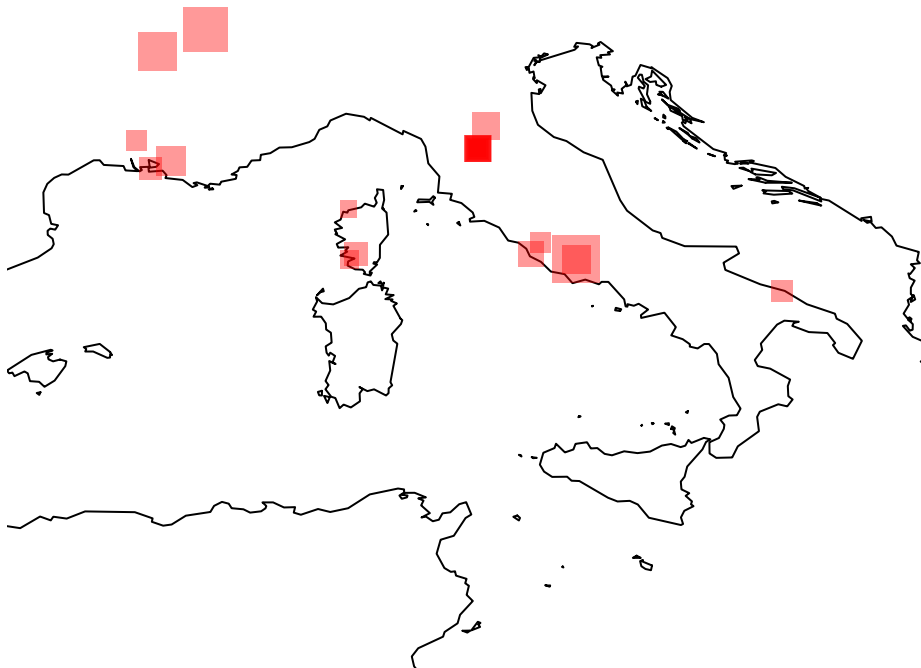

**580 cal. AD**

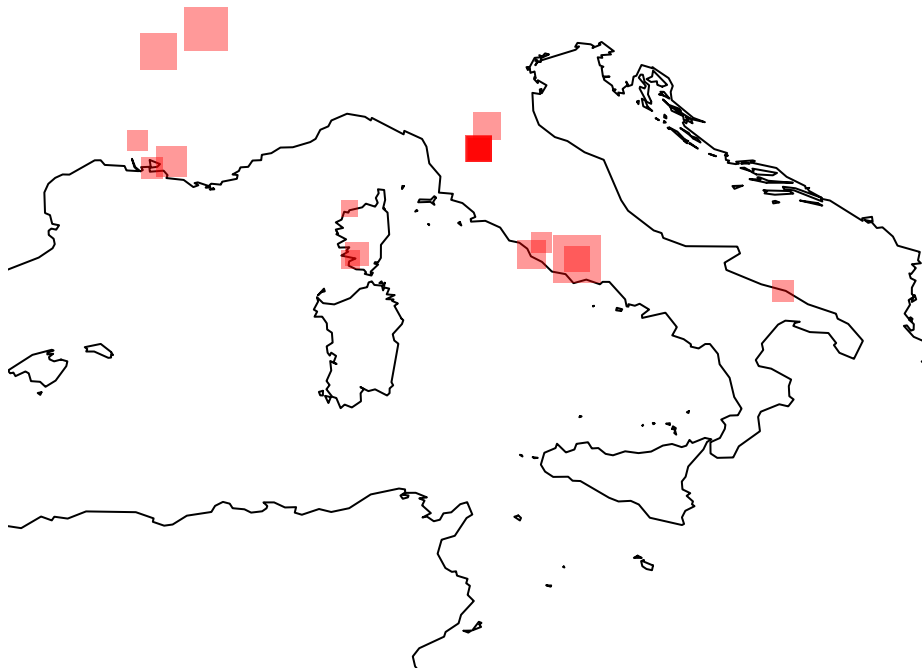

585 cal. AD

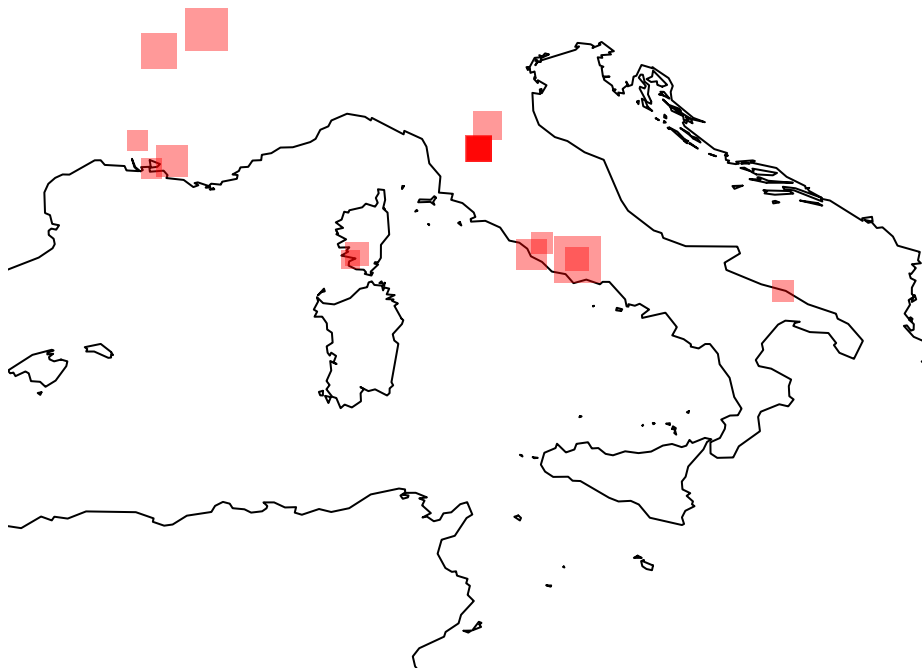

590 cal. AD

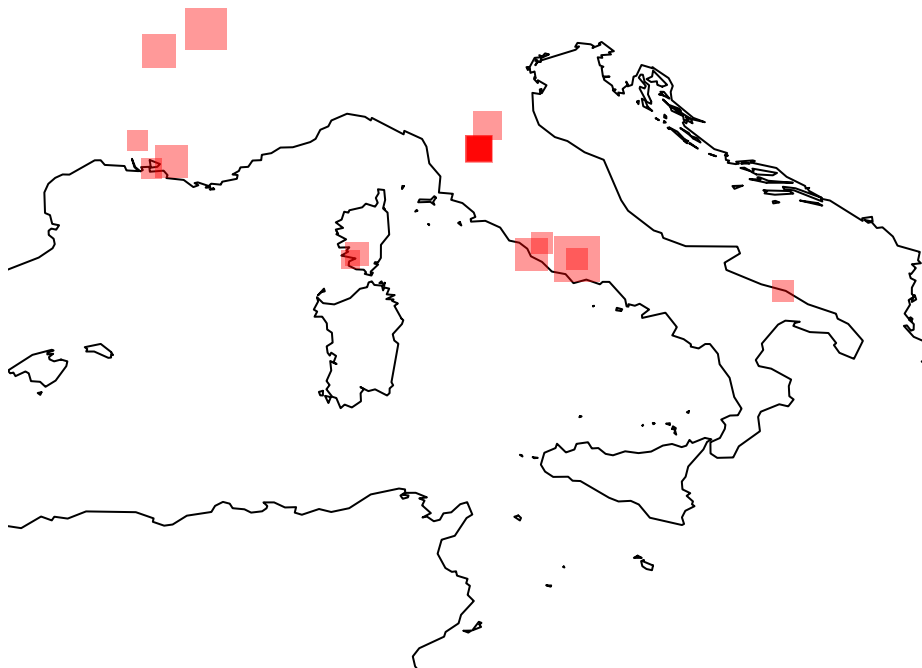



595 cal. AD

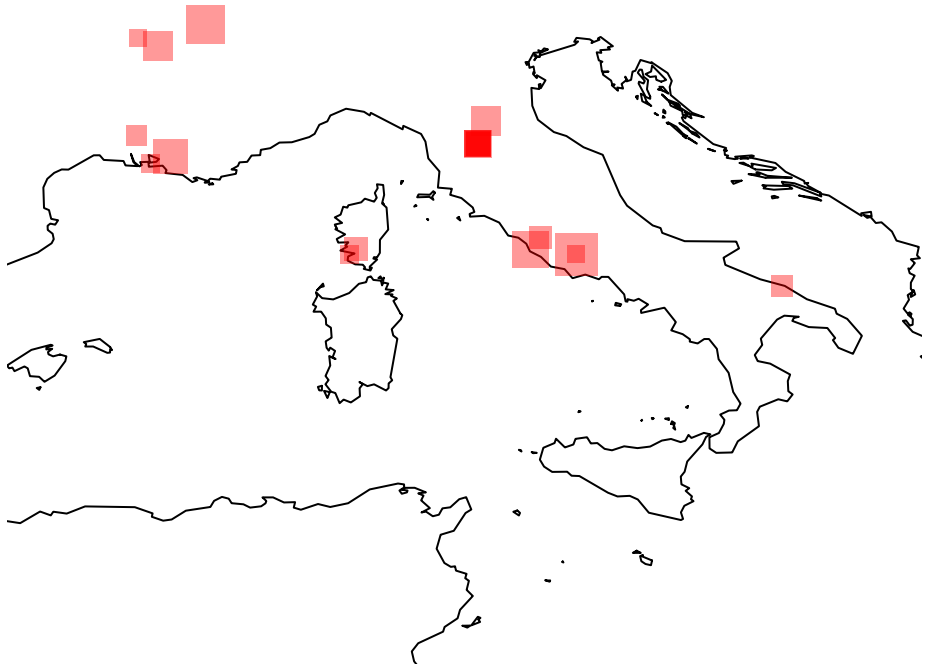

600 cal. AD

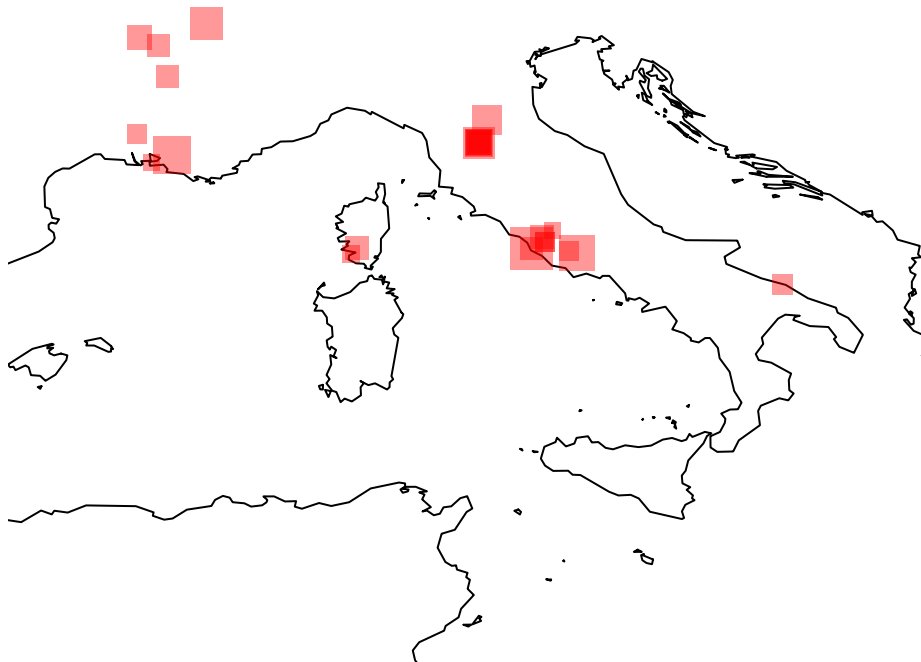

605 cal. AD

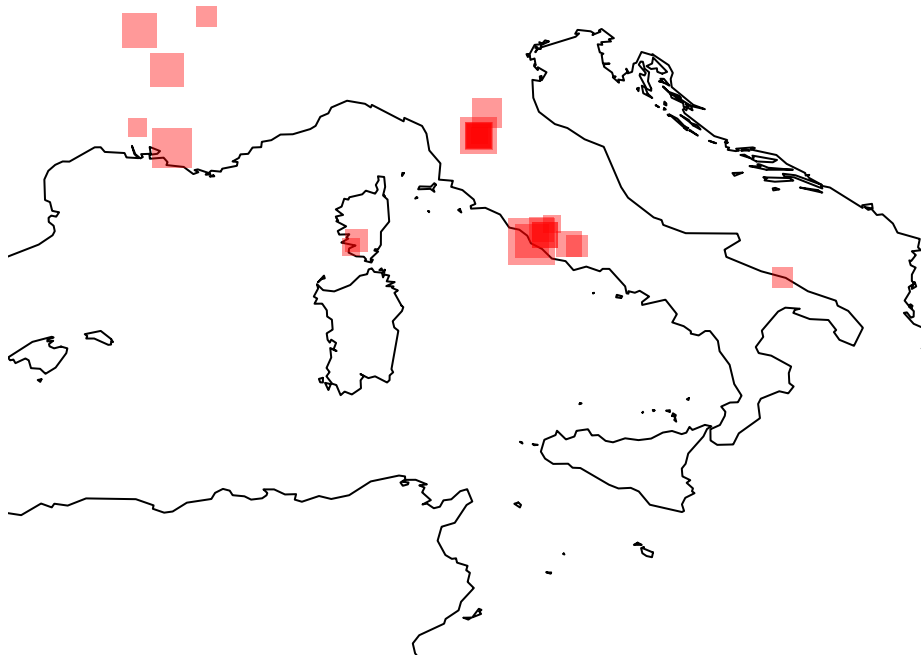

610 cal. AD

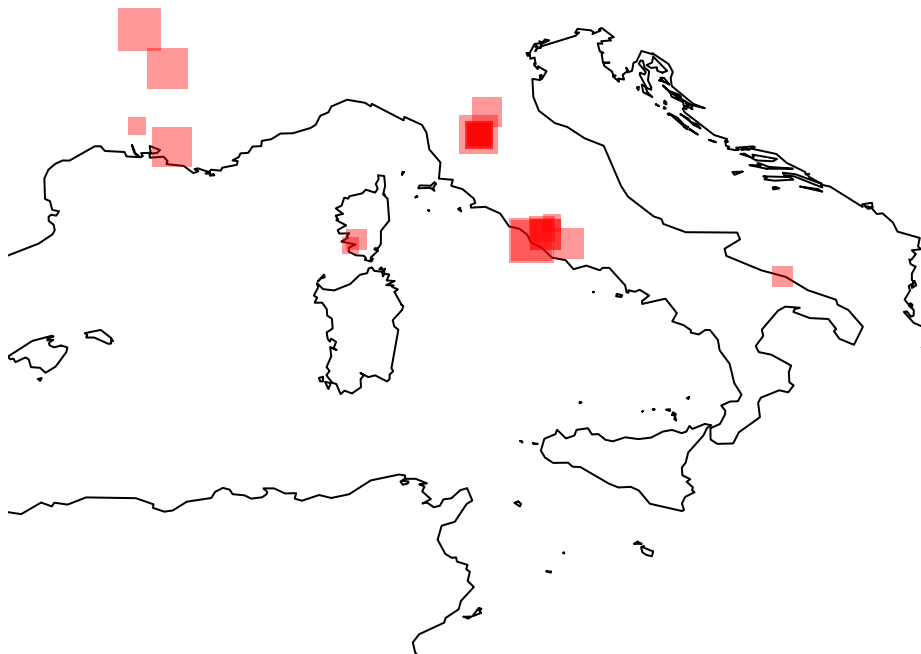

615 cal. AD

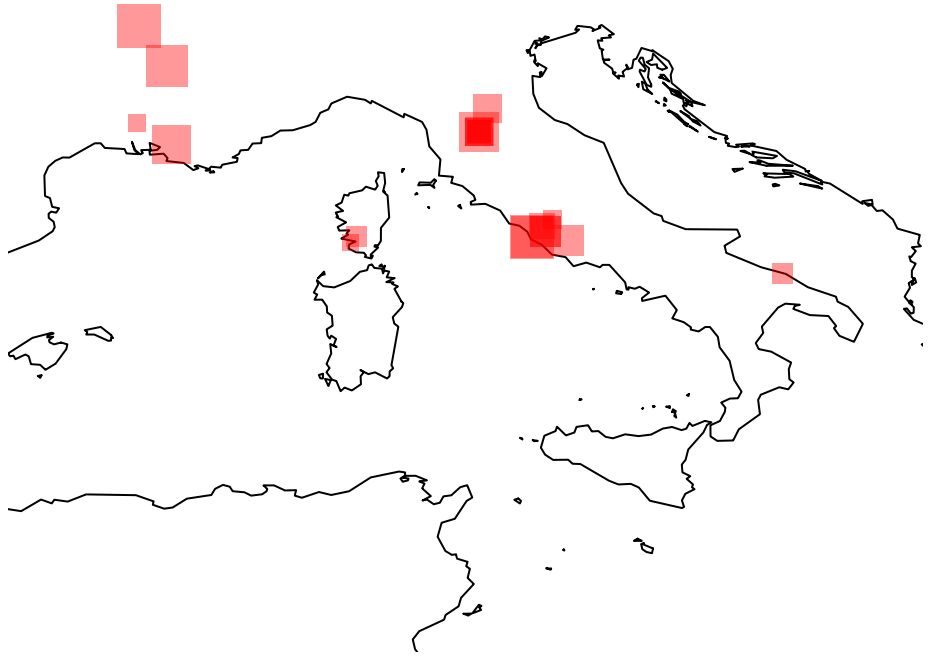

620 cal. AD

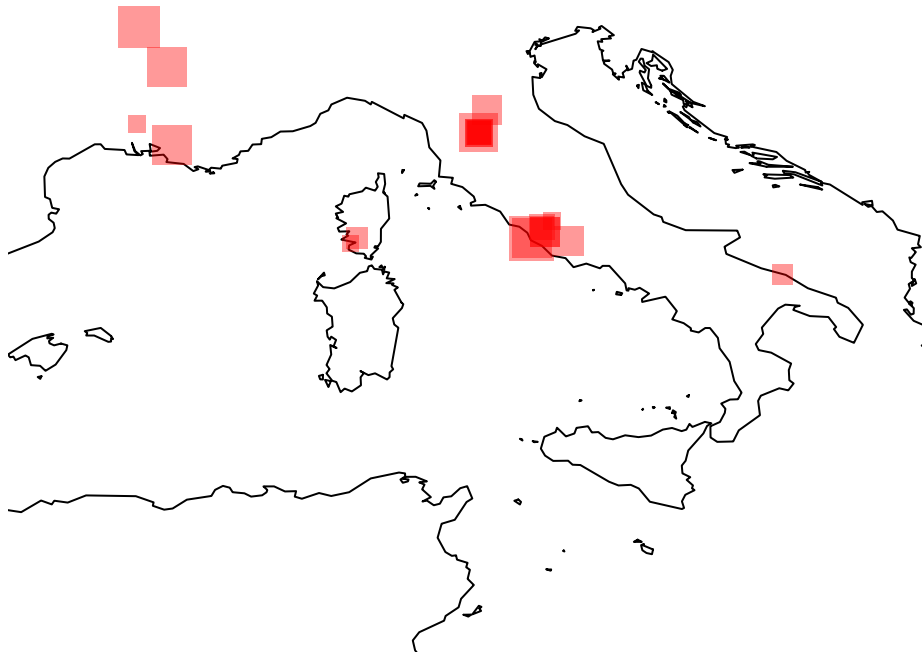

625 cal. AD

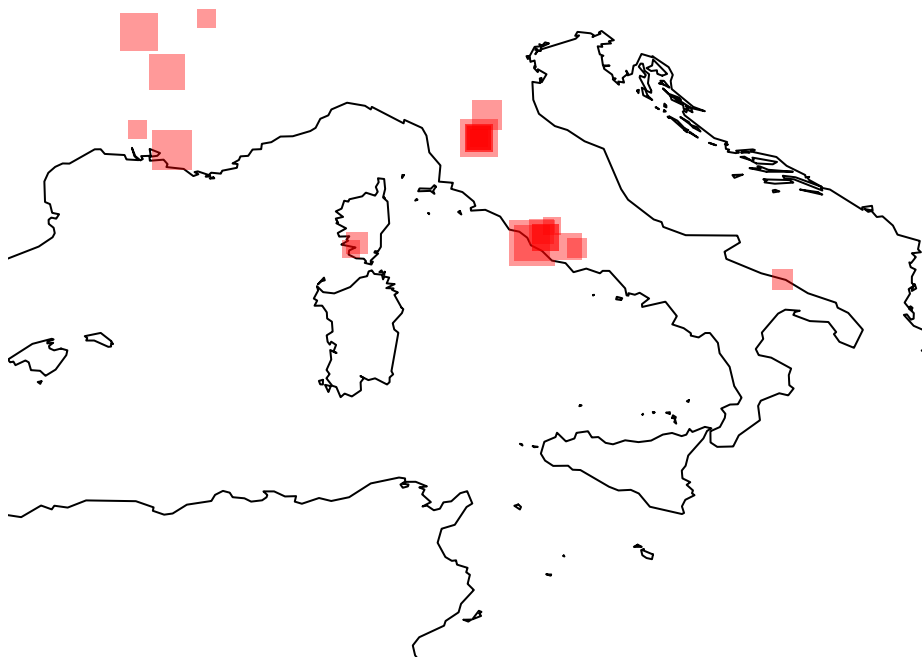

630 cal. AD

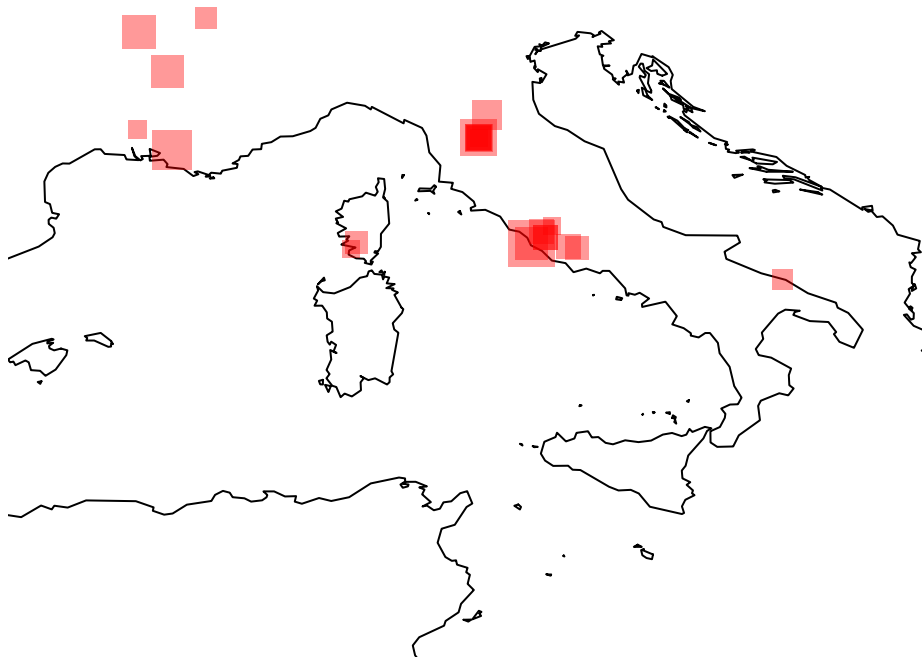



635 cal. AD

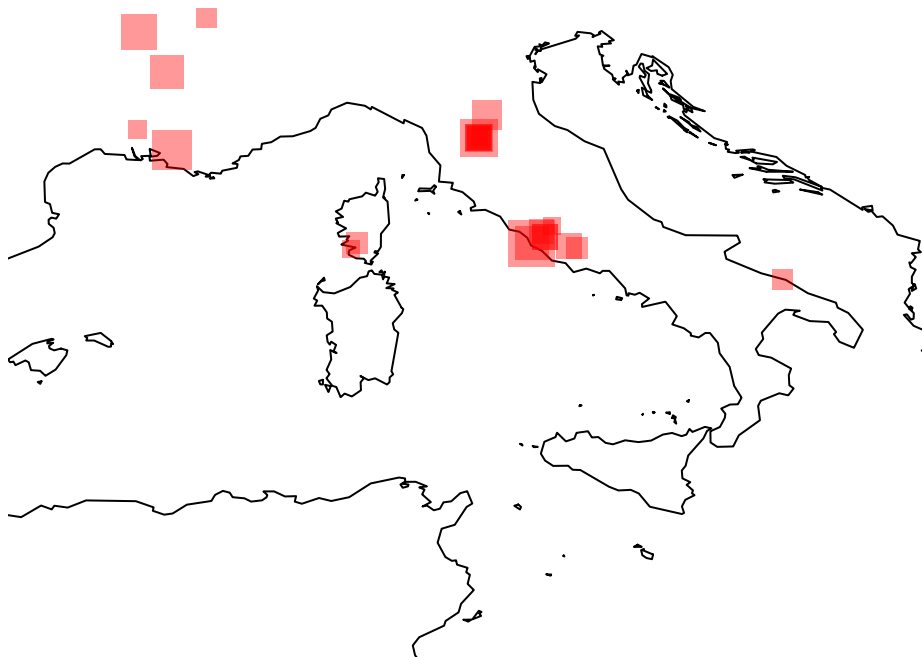

640 cal. AD

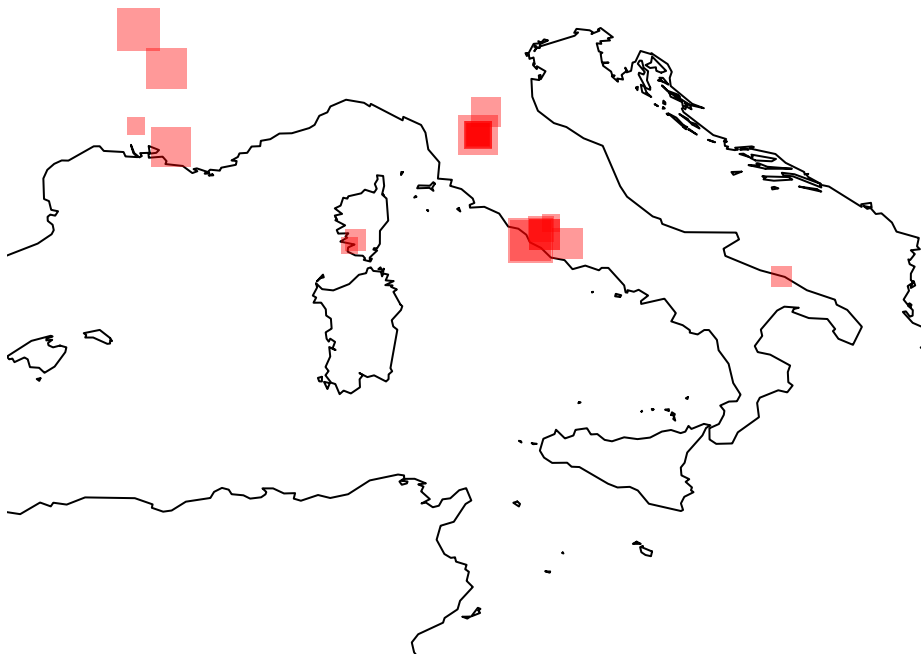

645 cal. AD

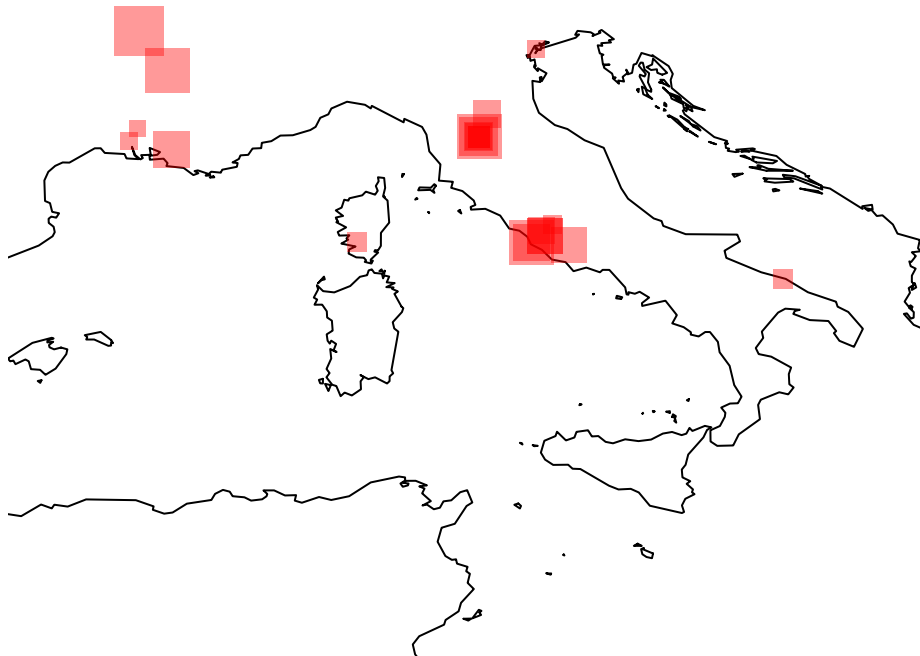

650 cal. AD

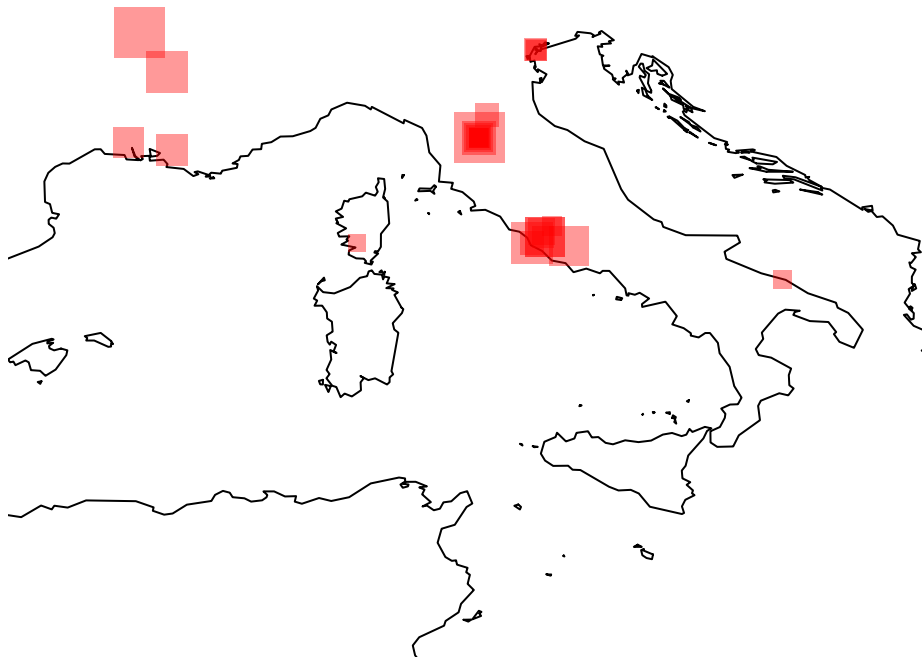

655 cal. AD

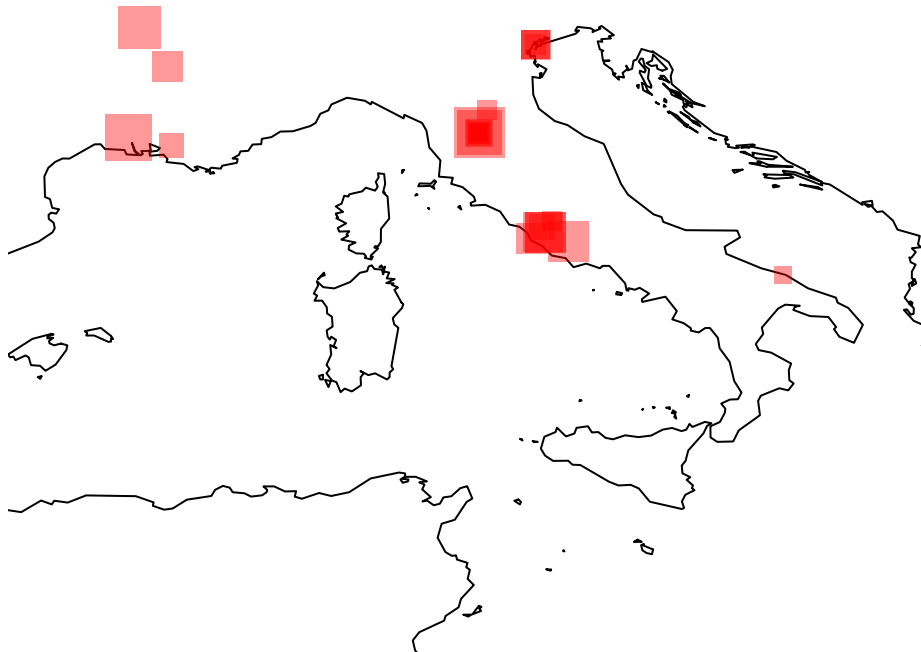

660 cal. AD

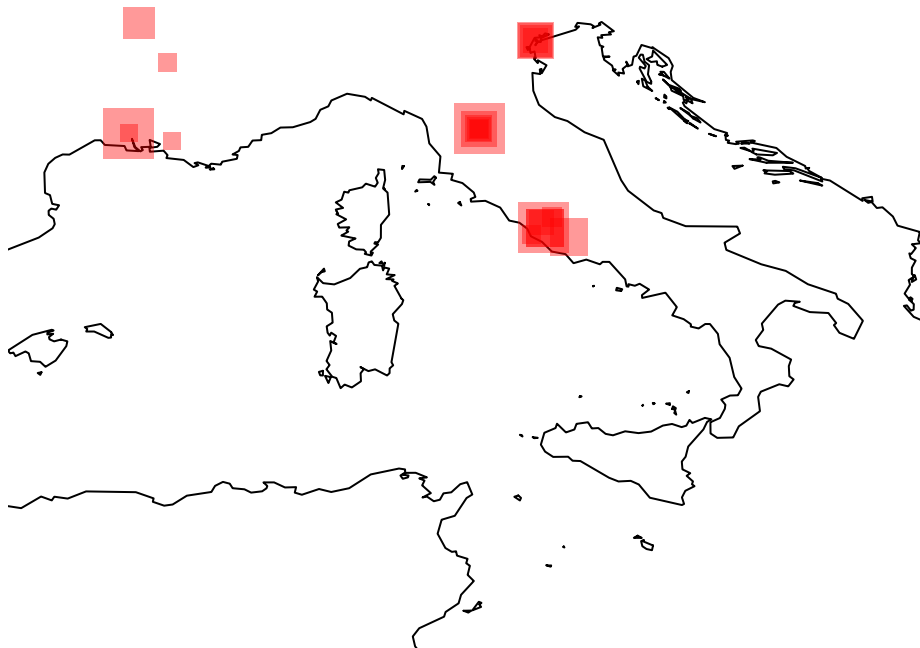

665 cal. AD

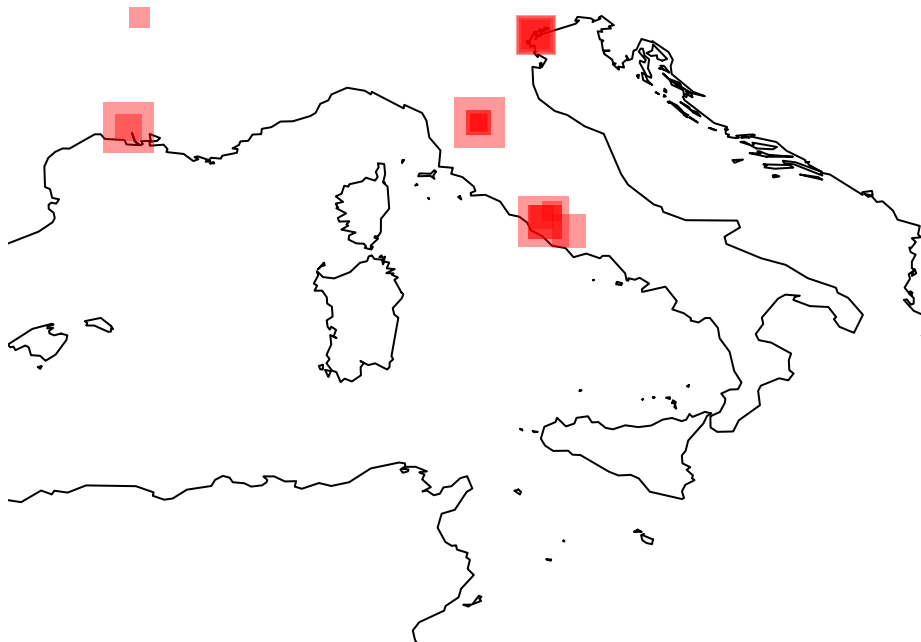

670 cal. AD

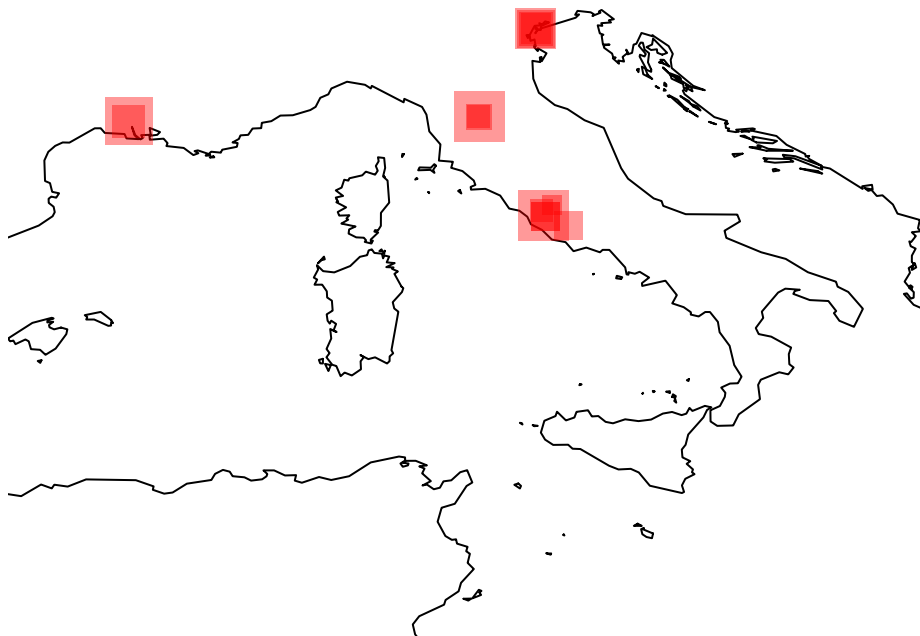



675 cal. AD

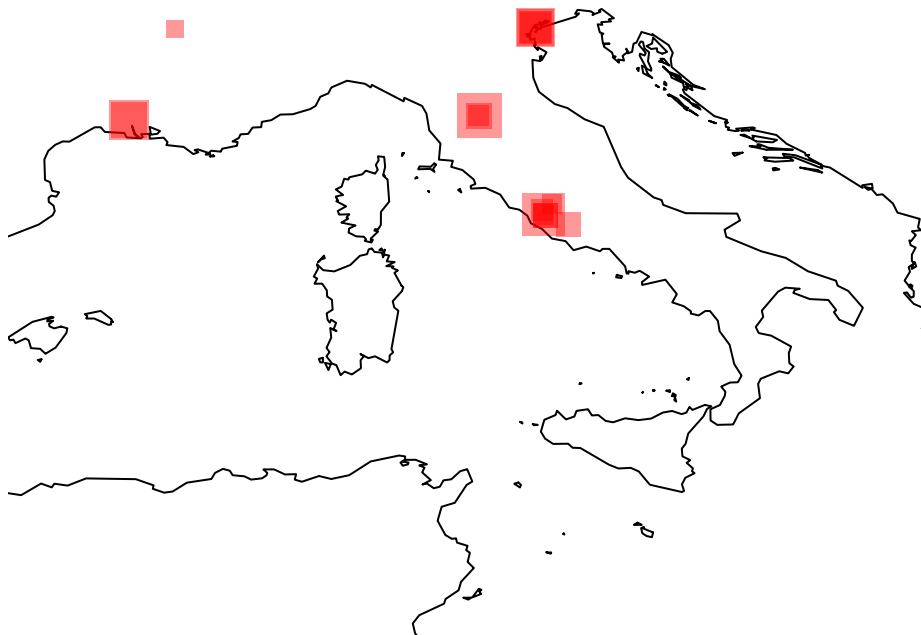

680 cal. AD

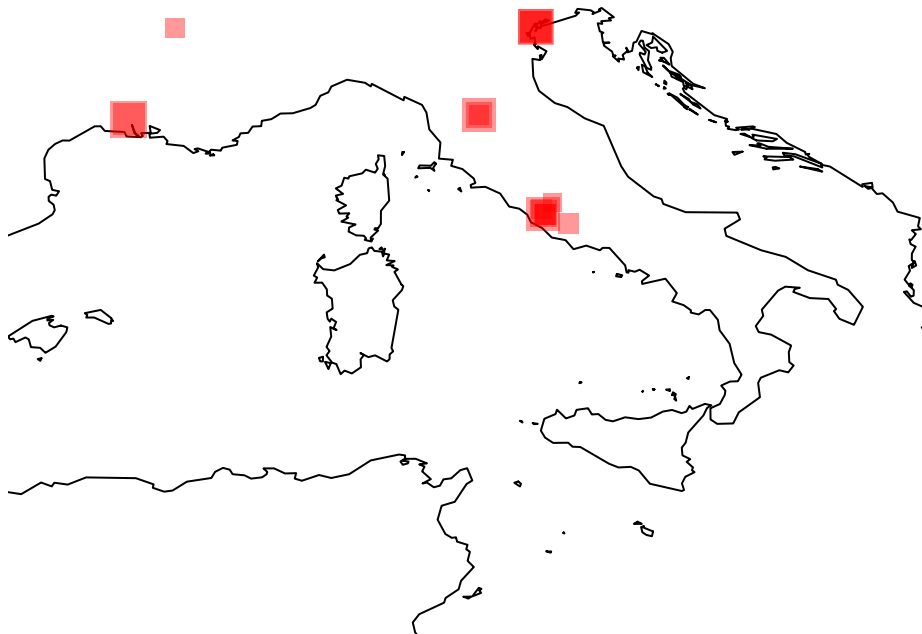

685 cal. AD

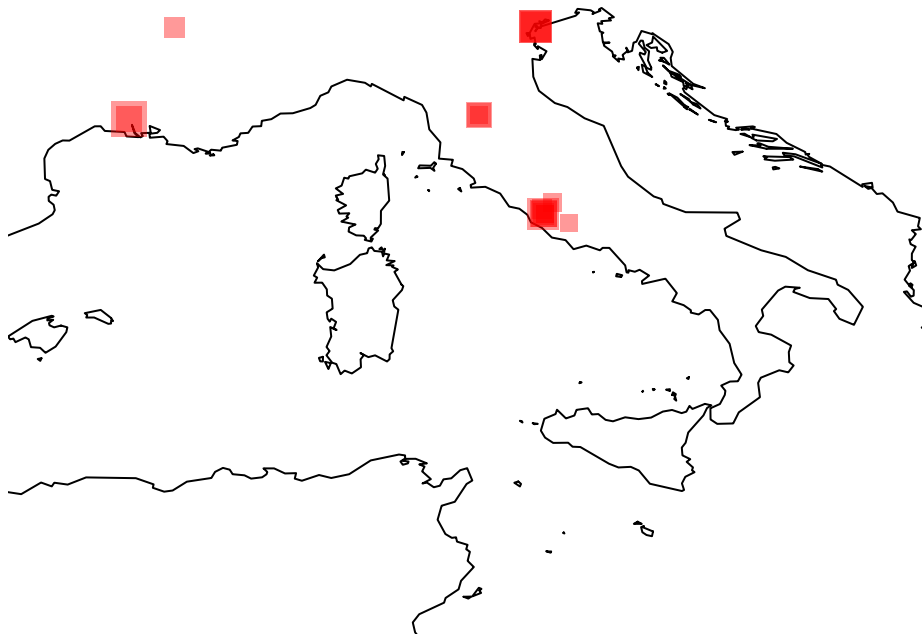

690 cal. AD

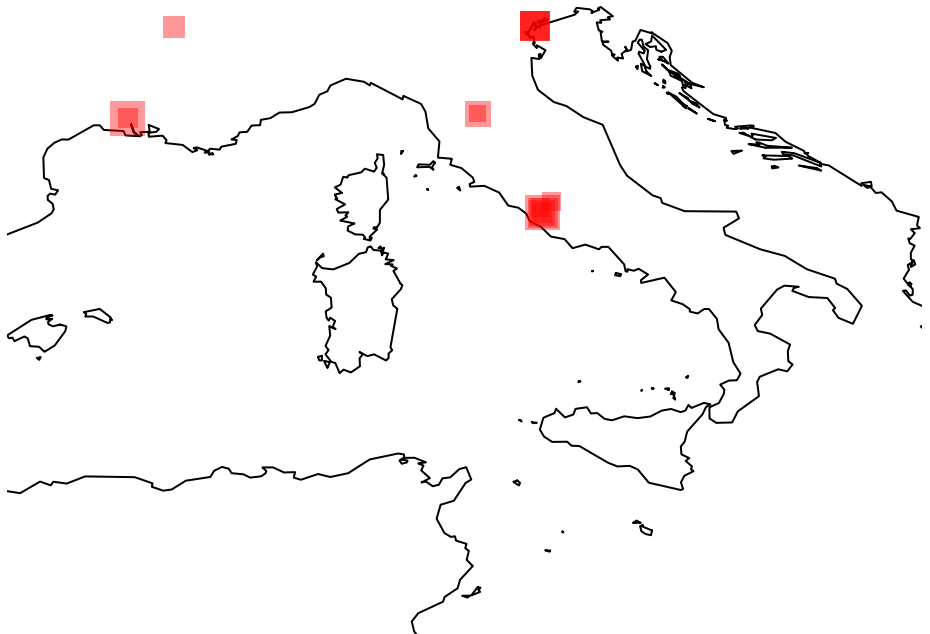

695 cal. AD

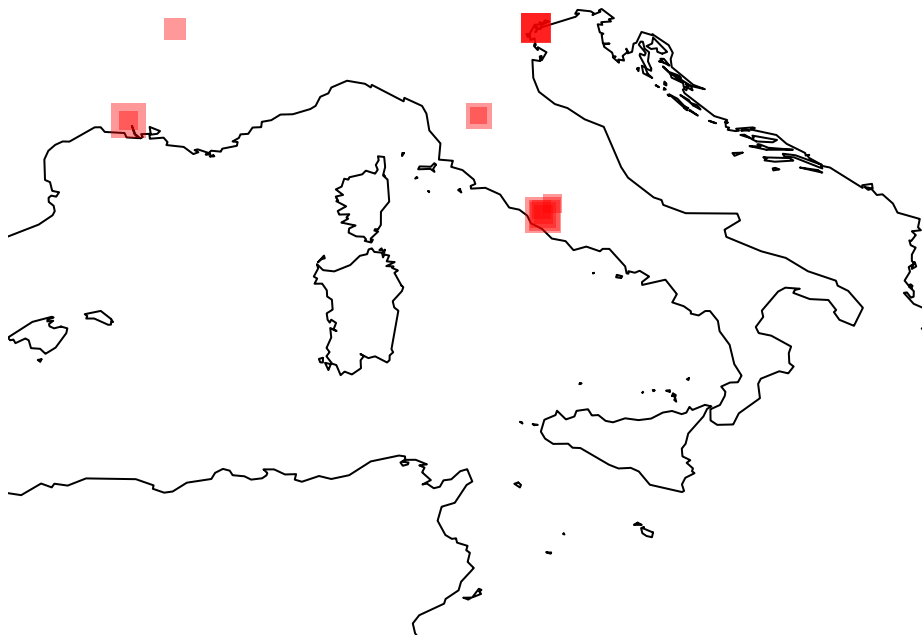

700 cal. AD

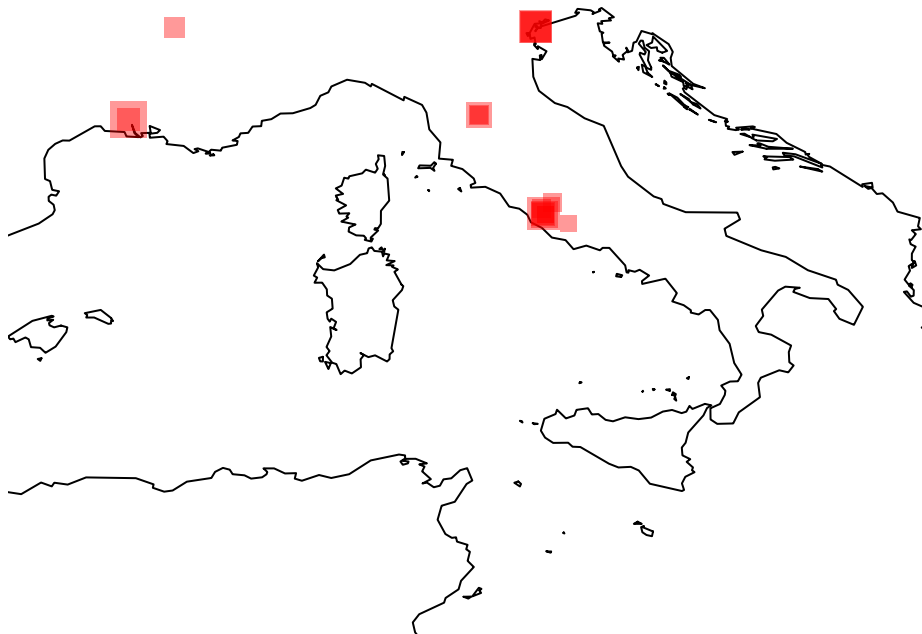

705 cal. AD

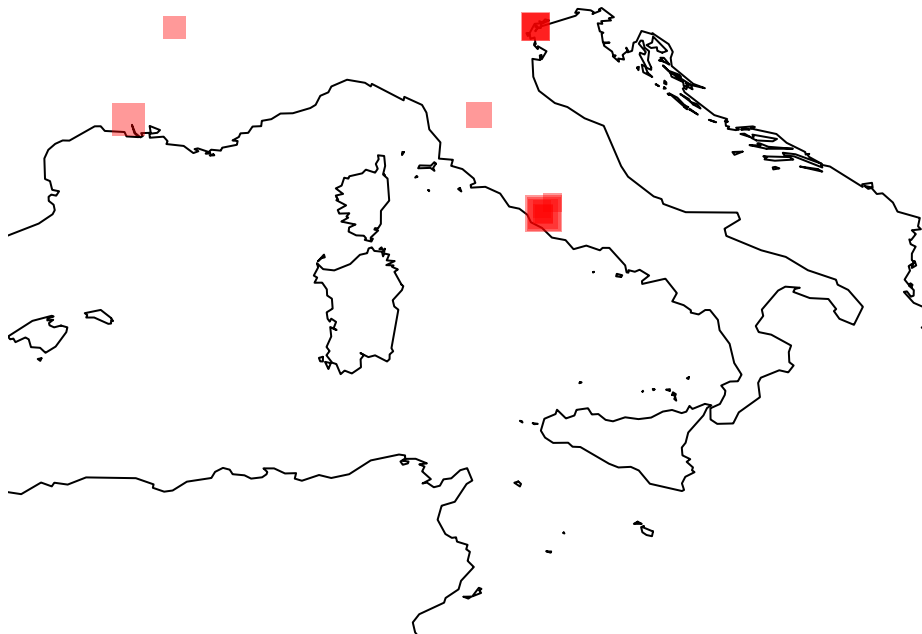

710 cal. AD

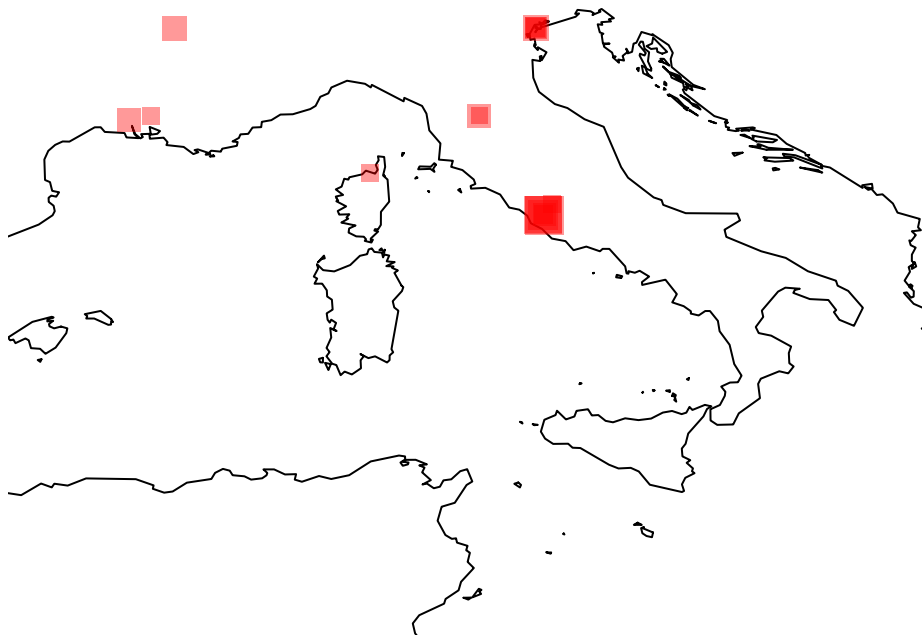



715 cal. AD

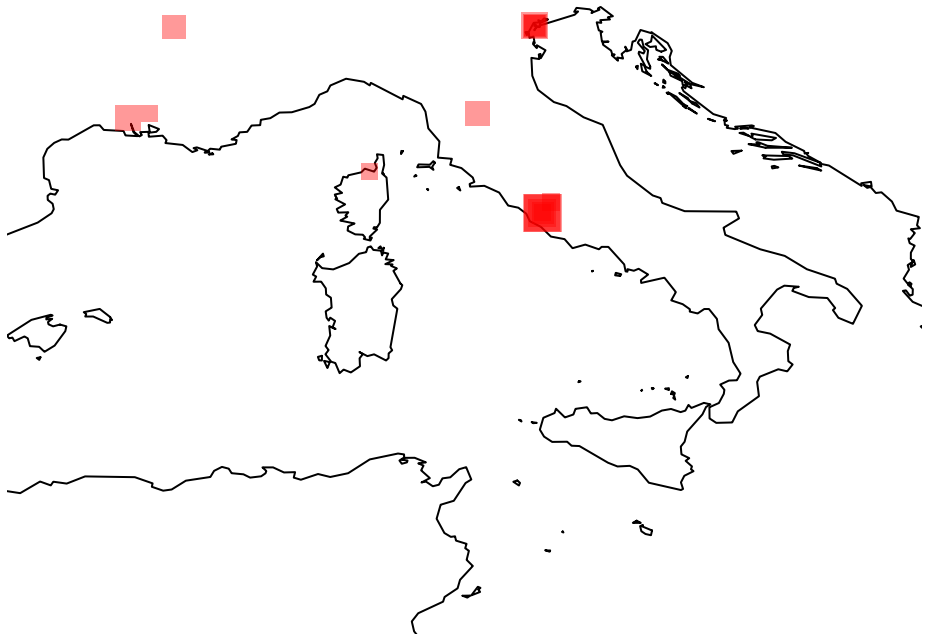

720 cal. AD

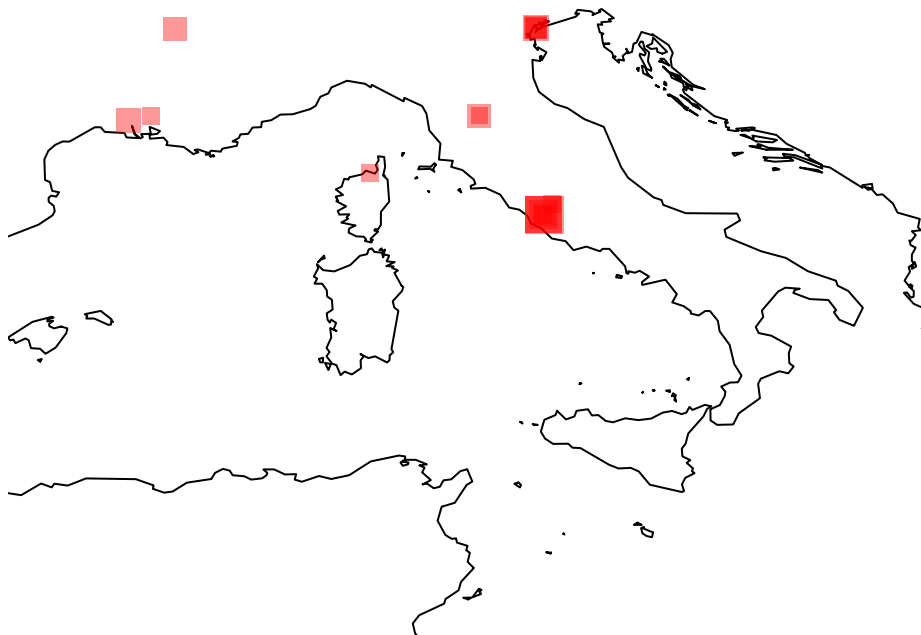

725 cal. AD

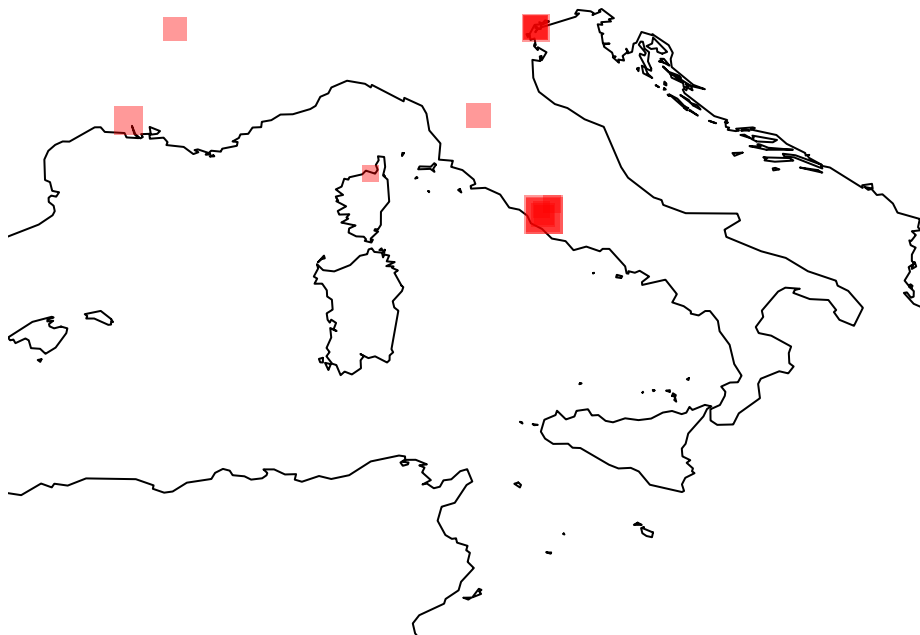

730 cal. AD

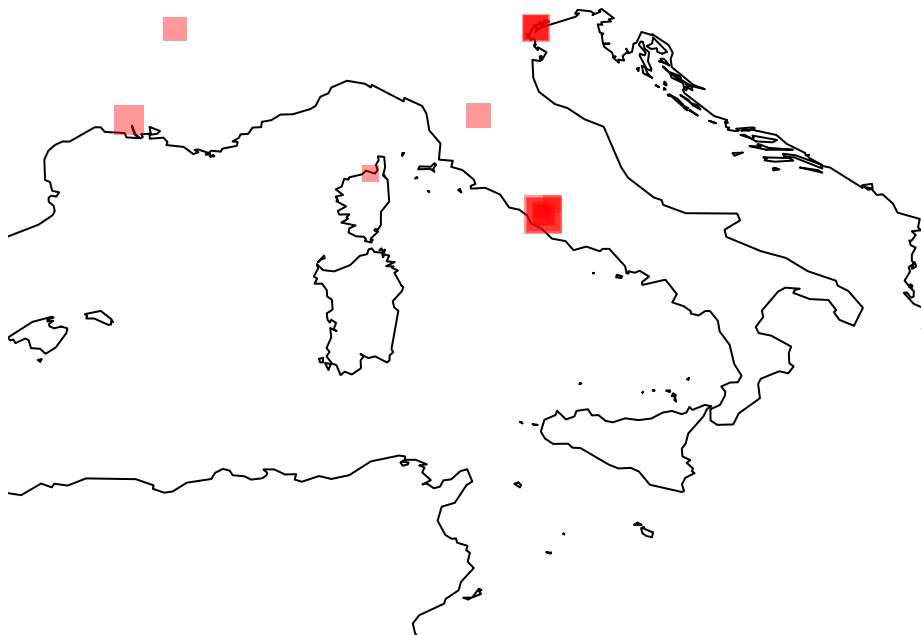

735 cal. AD

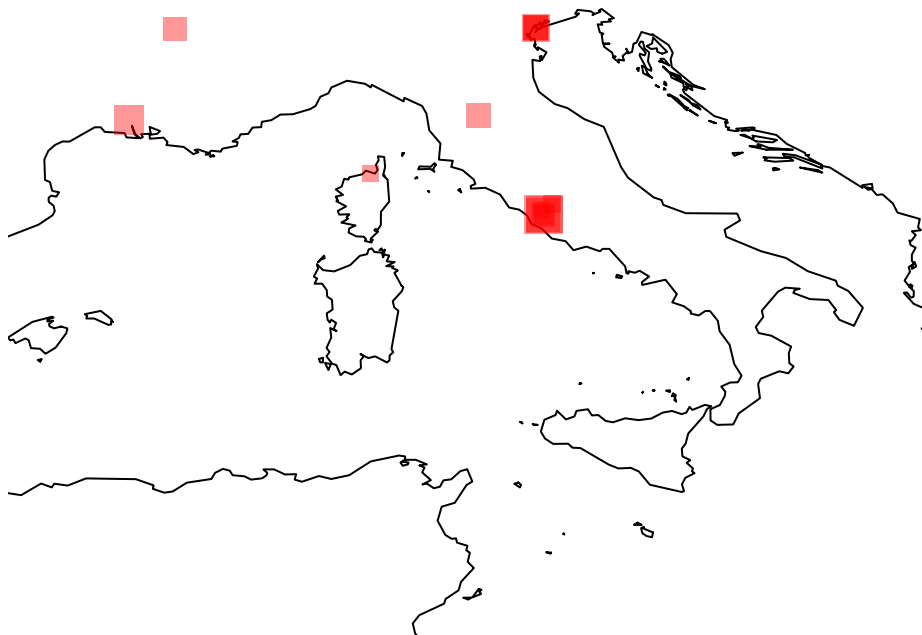

740 cal. AD

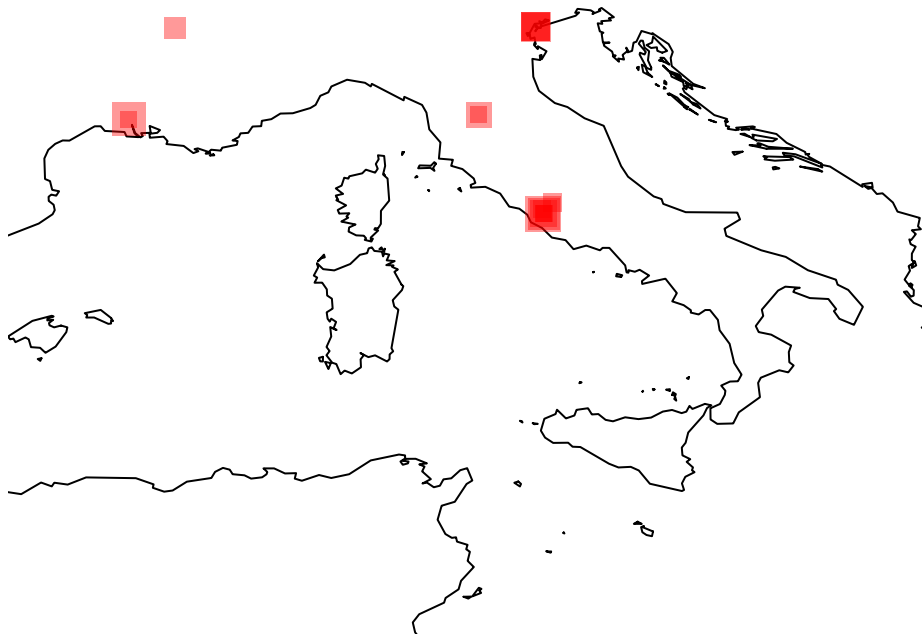

745 cal. AD

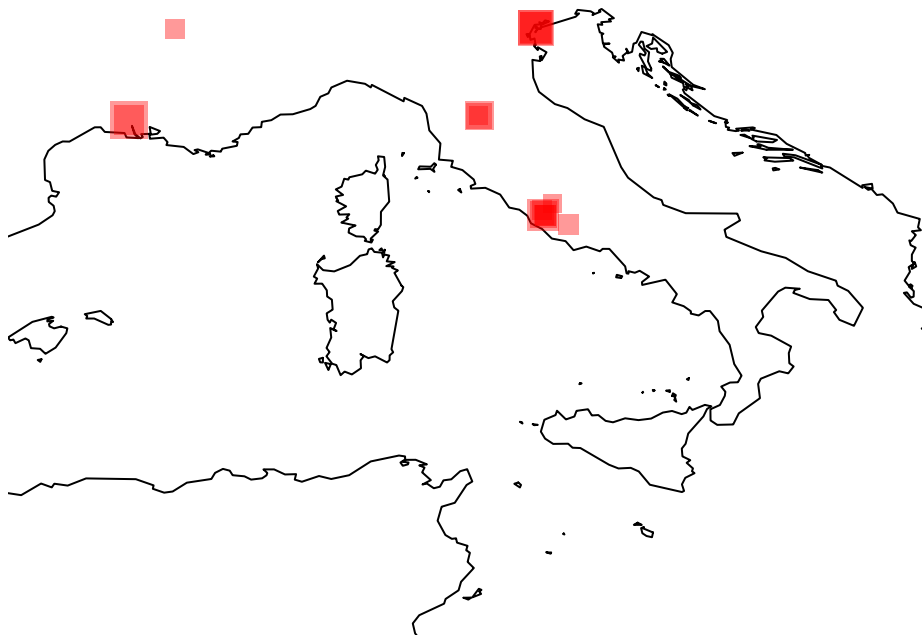

750 cal. AD

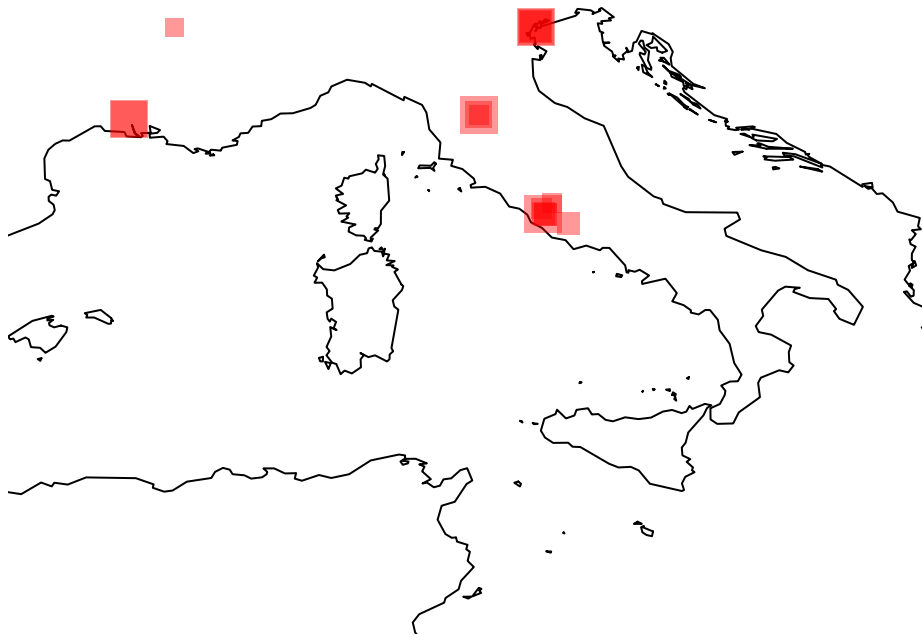



755 cal. AD

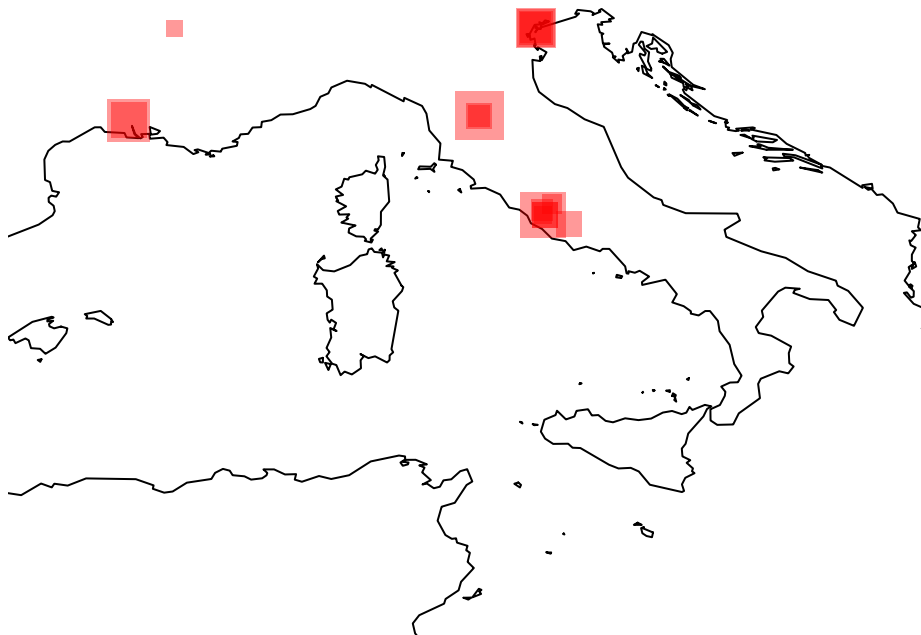

760 cal. AD

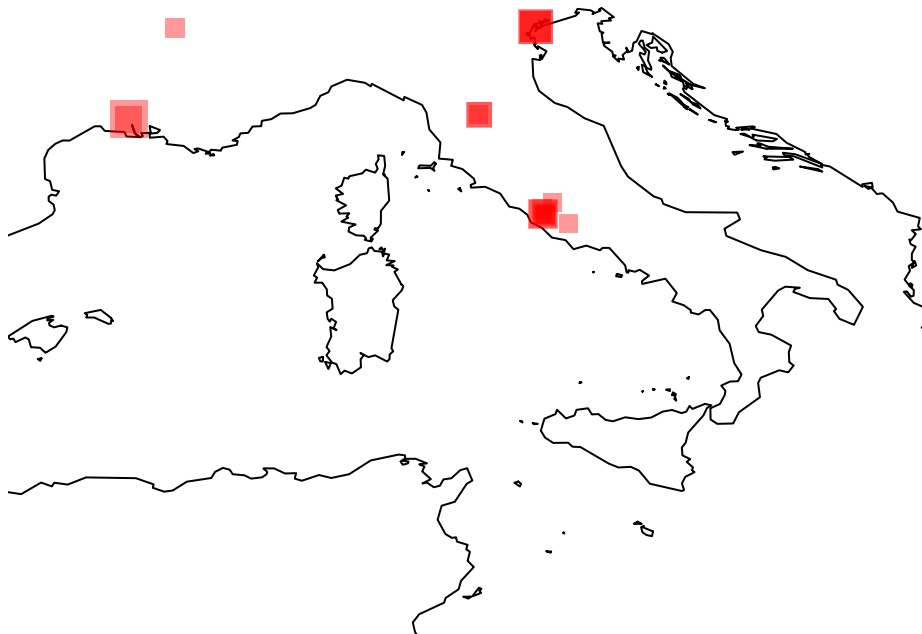

765 cal. AD

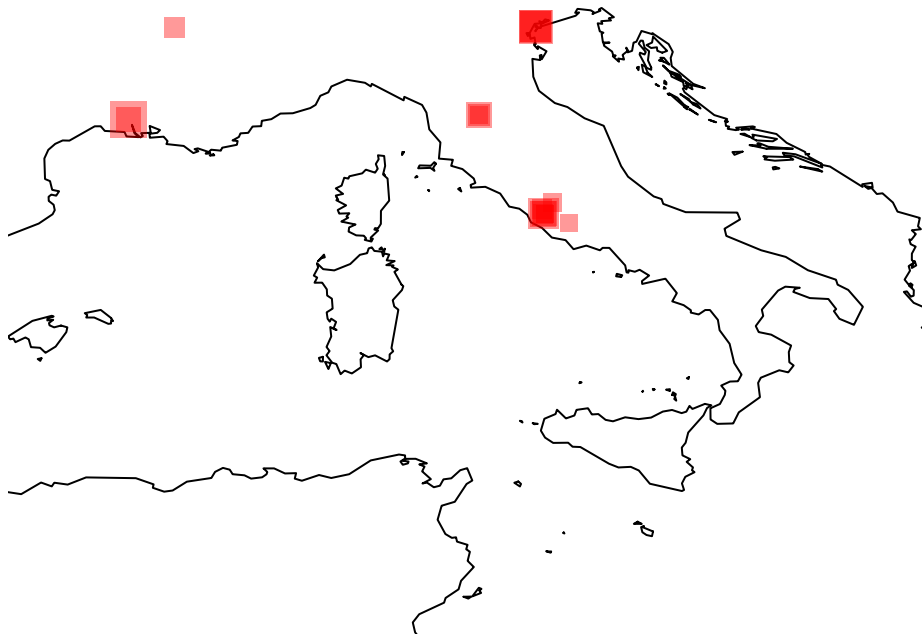

770 cal. AD

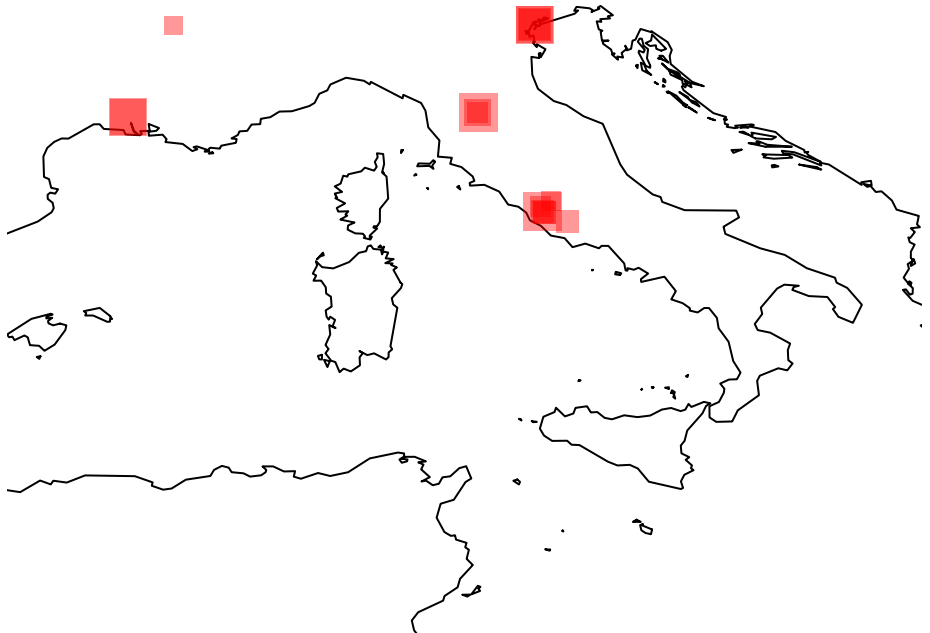

775 cal. AD

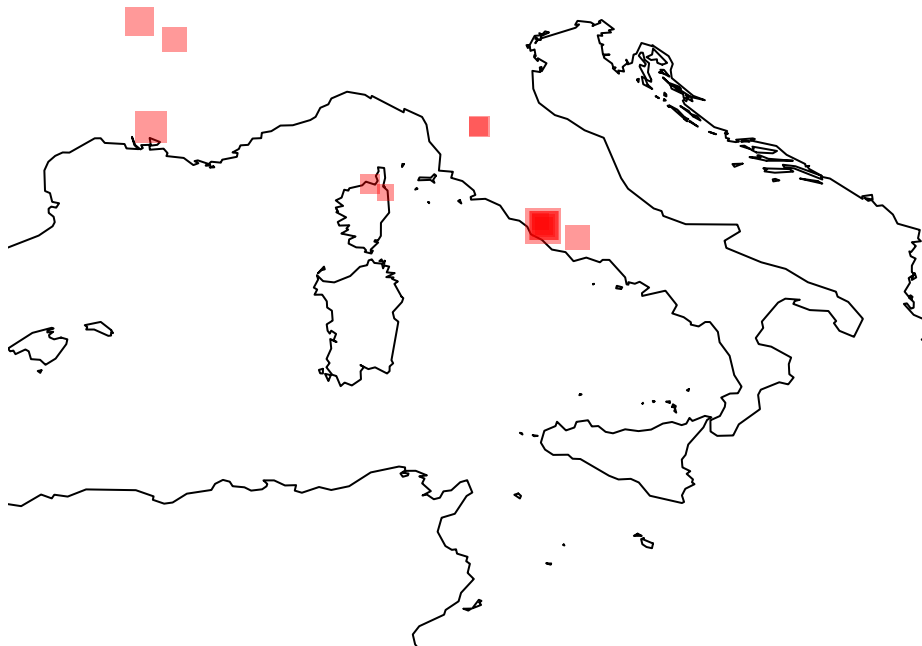

780 cal. AD

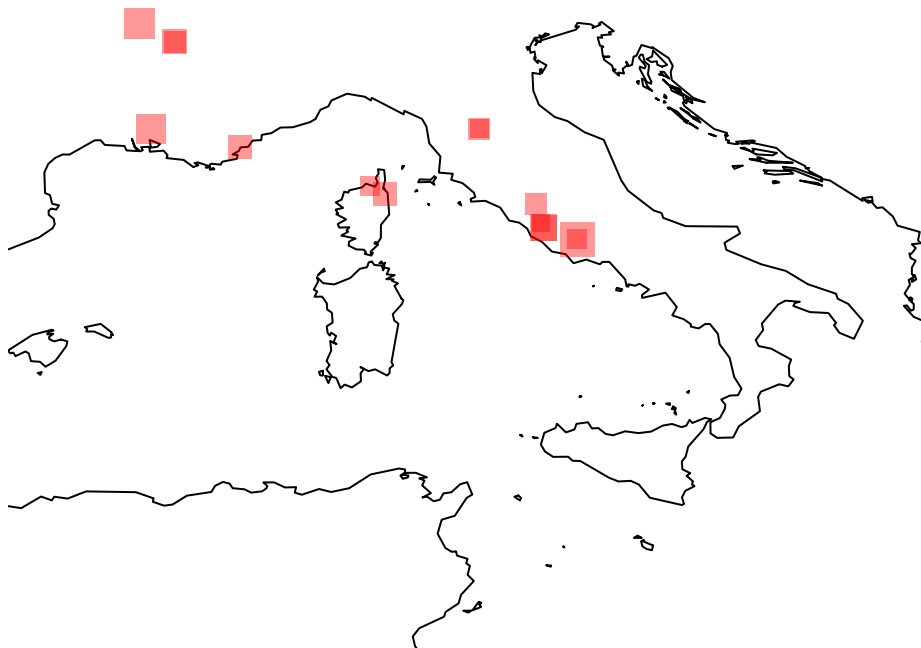

785 cal. AD

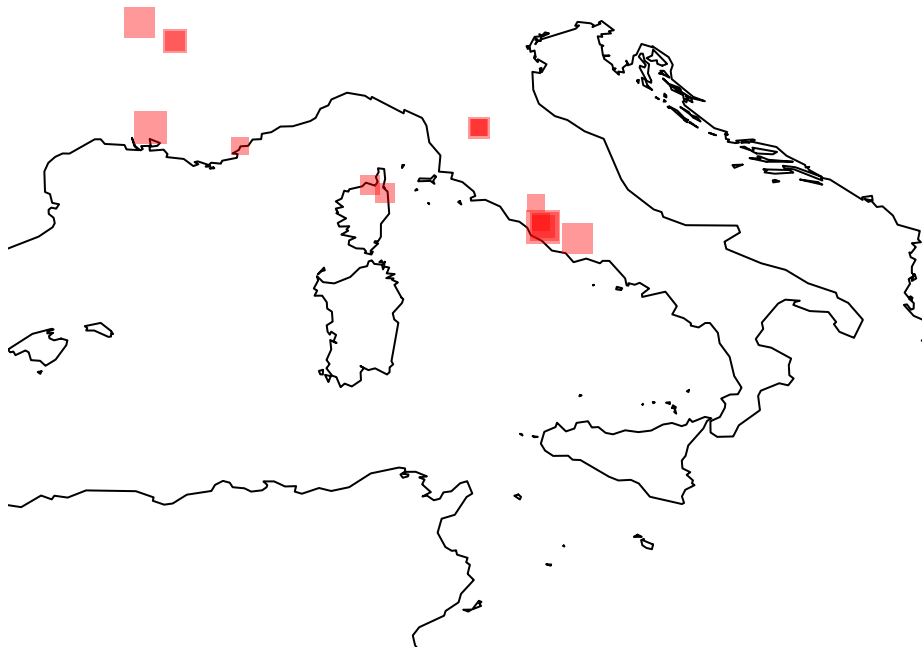

790 cal. AD

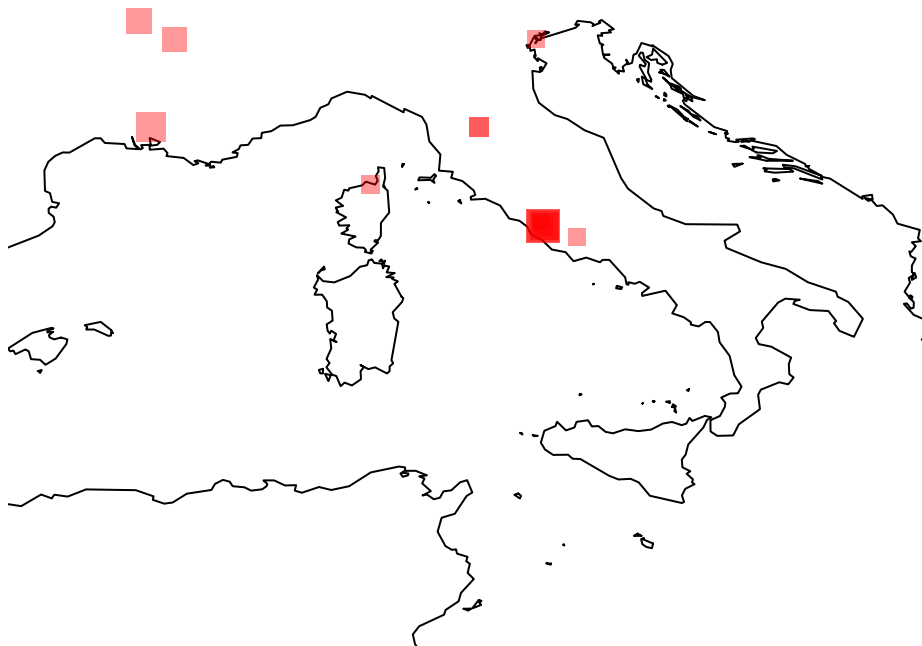



795 cal. AD

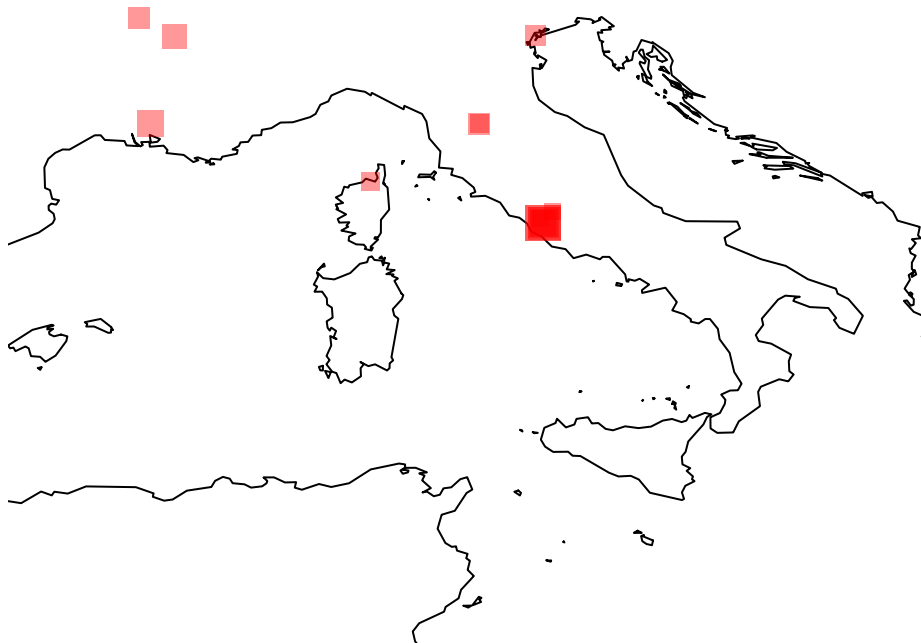

800 cal. AD

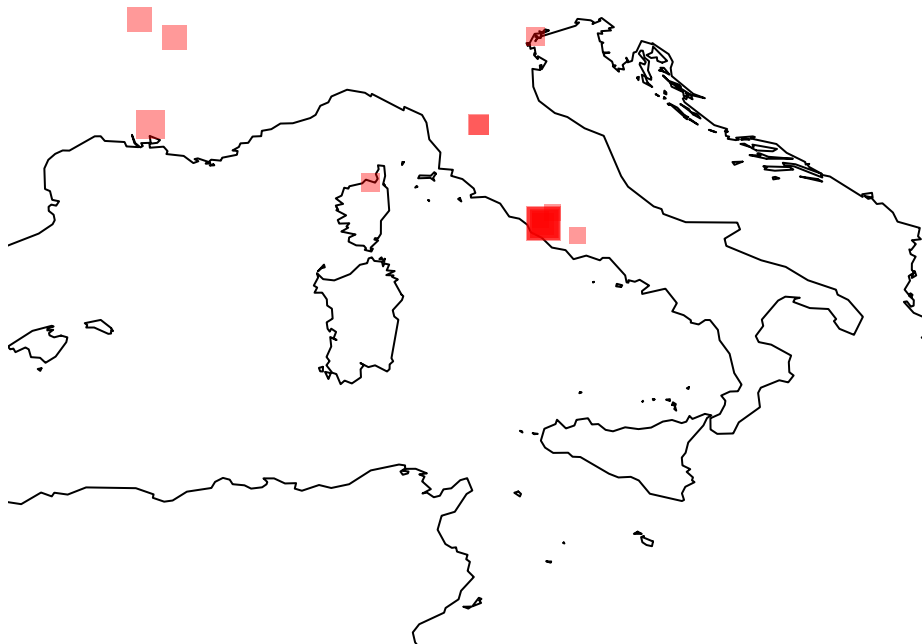

805 cal. AD

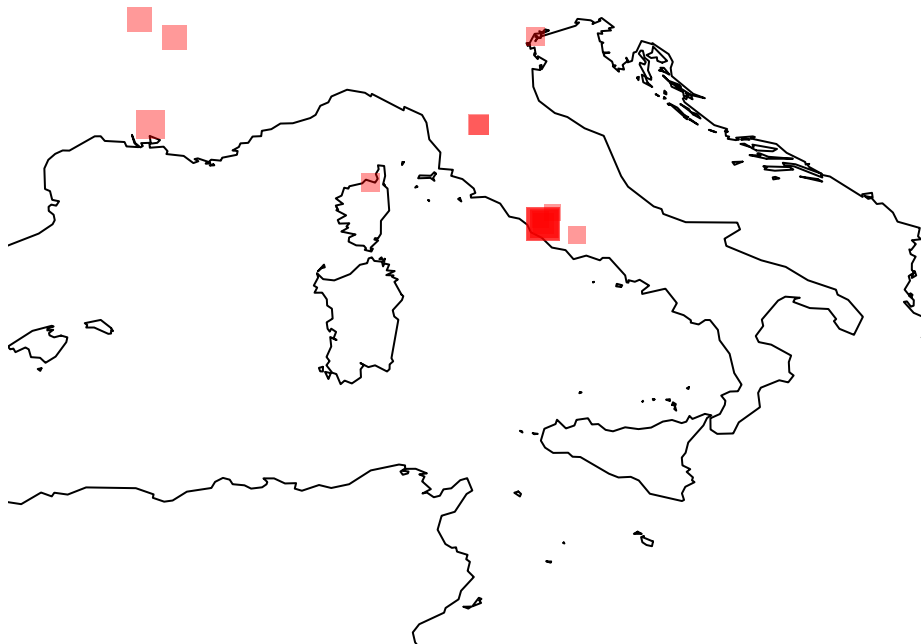

810 cal. AD



815 cal. AD

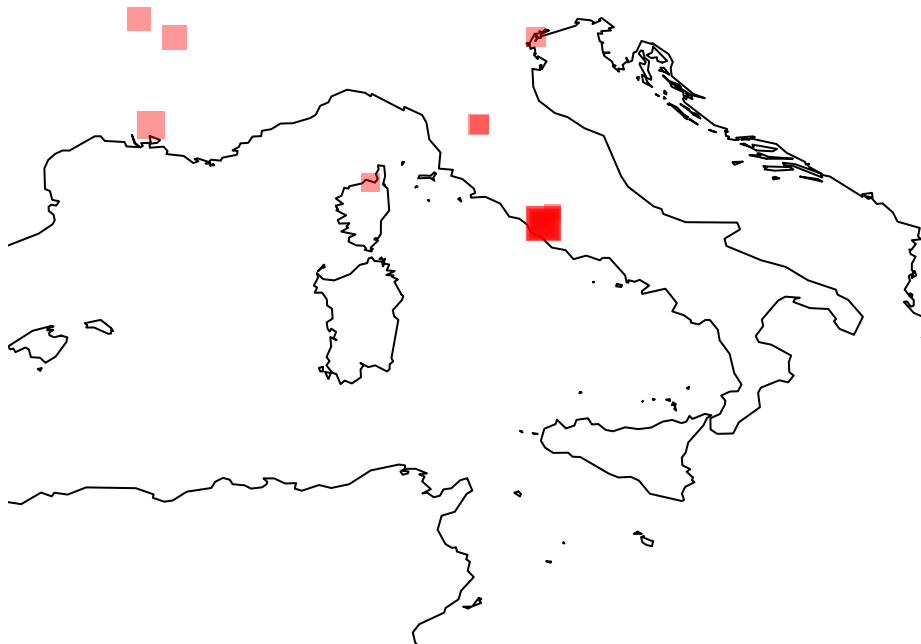

820 cal. AD

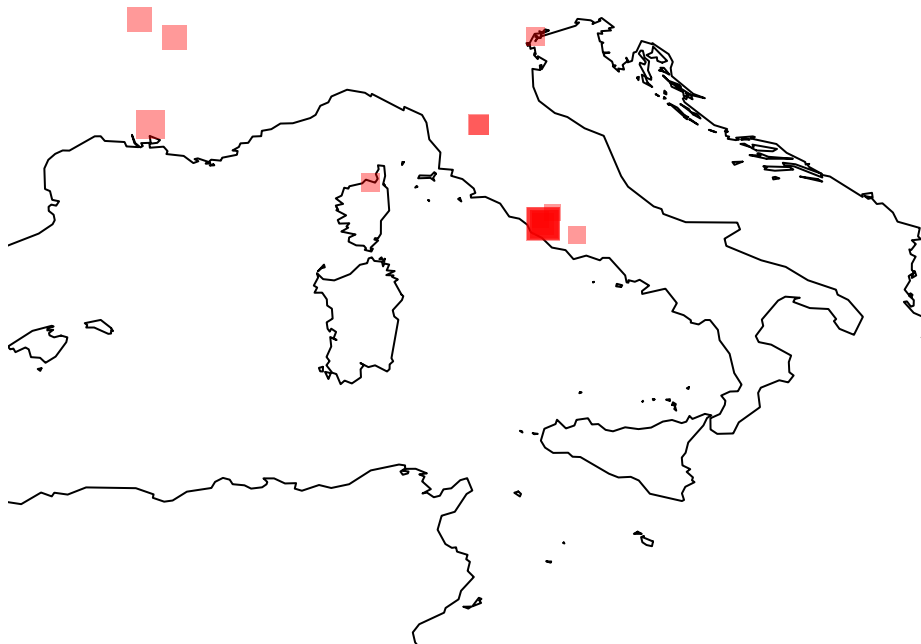

825 cal. AD

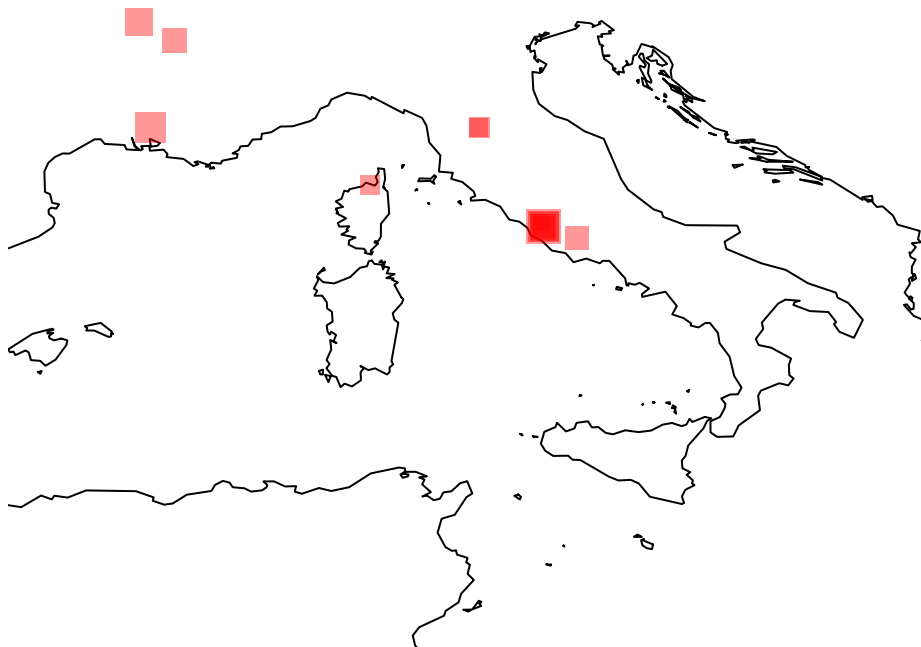

830 cal. AD

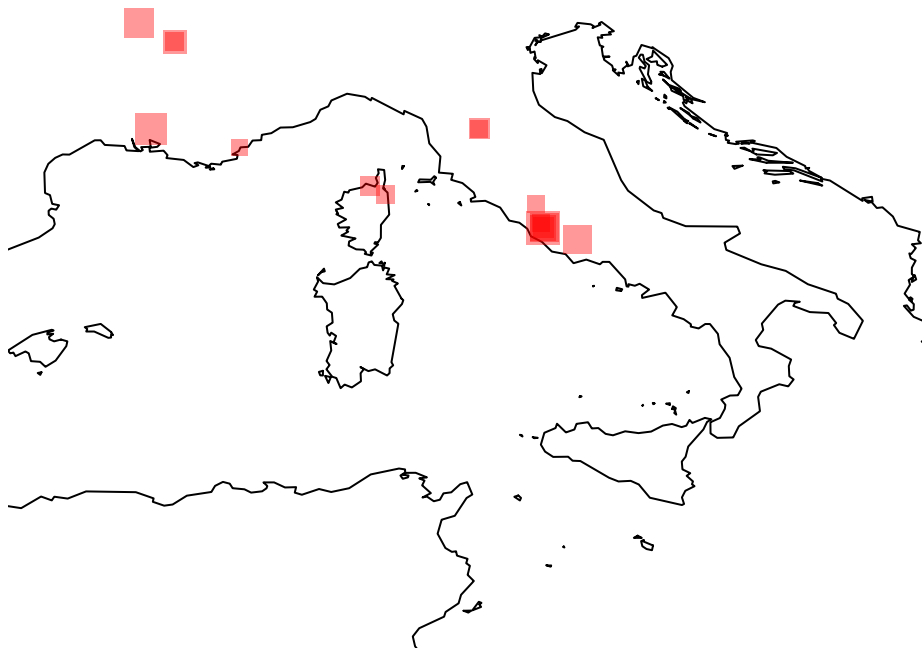



835 cal. AD

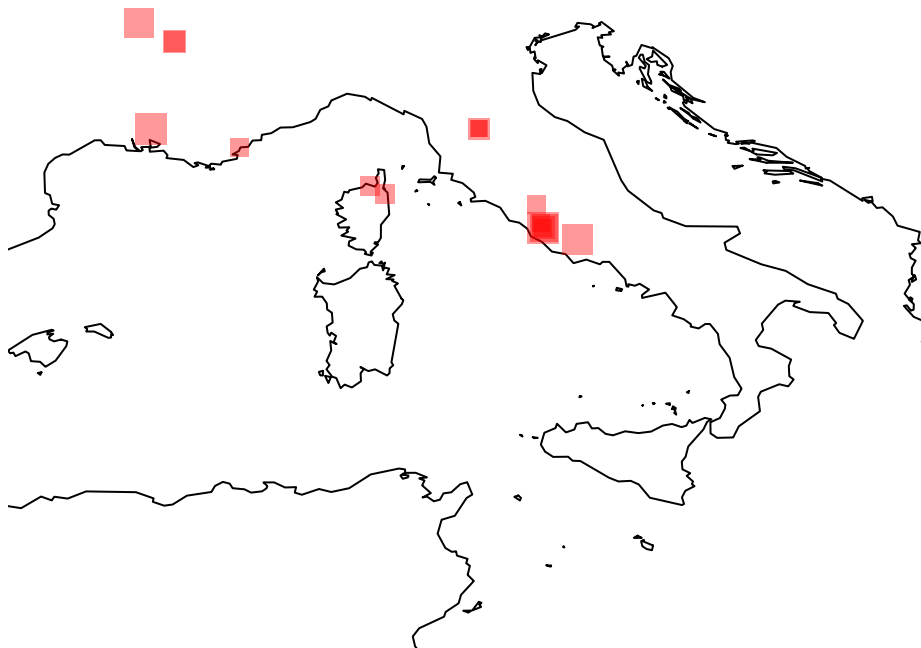

840 cal. AD

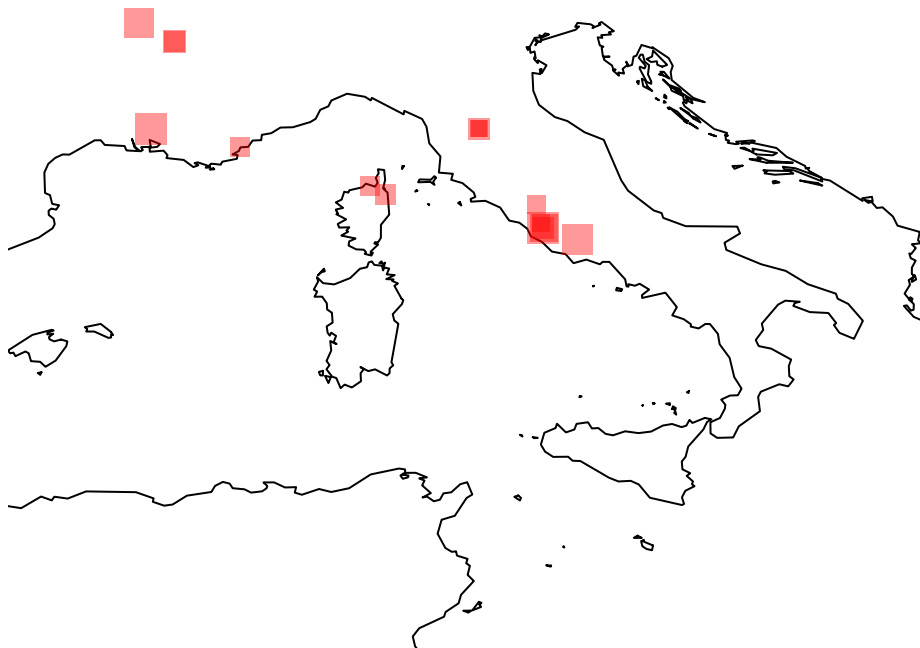

845 cal. AD

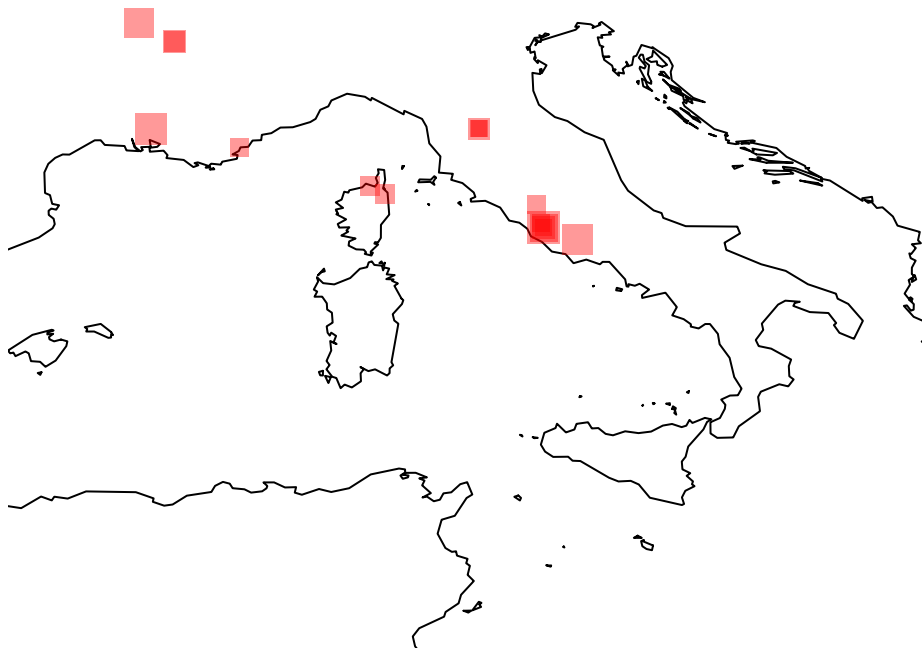

850 cal. AD

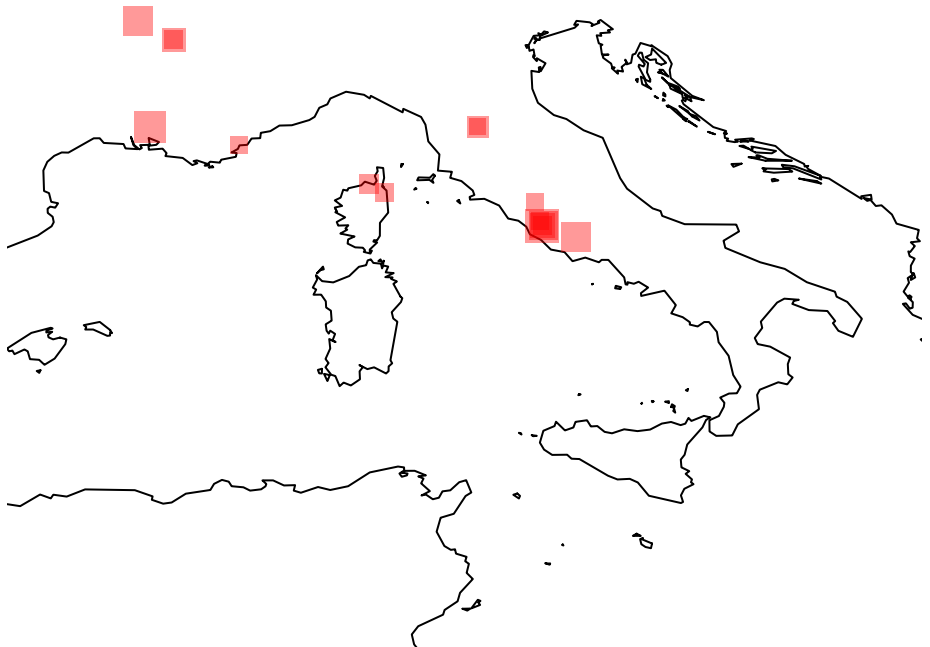

855 cal. AD

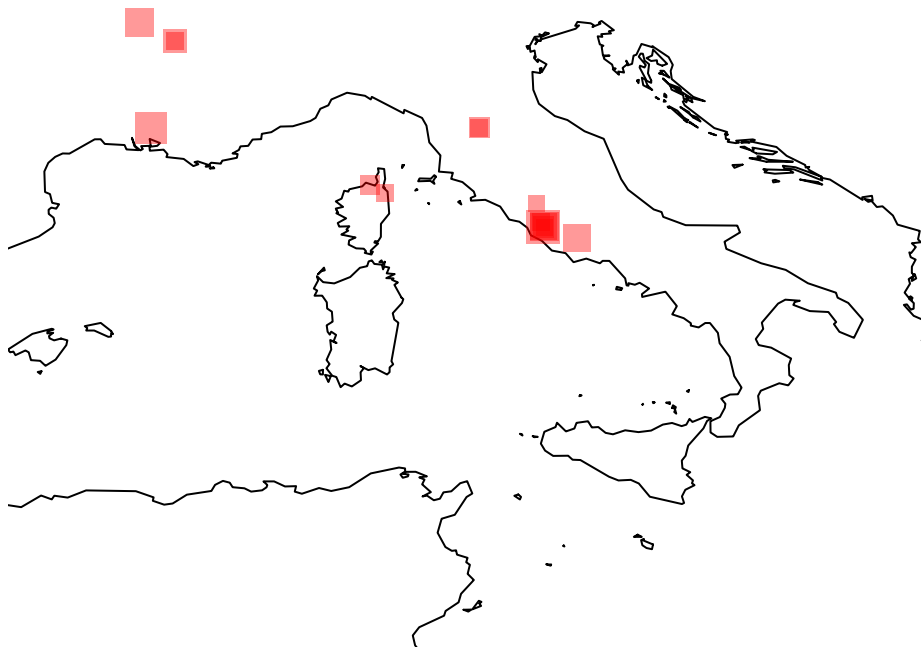

860 cal. AD

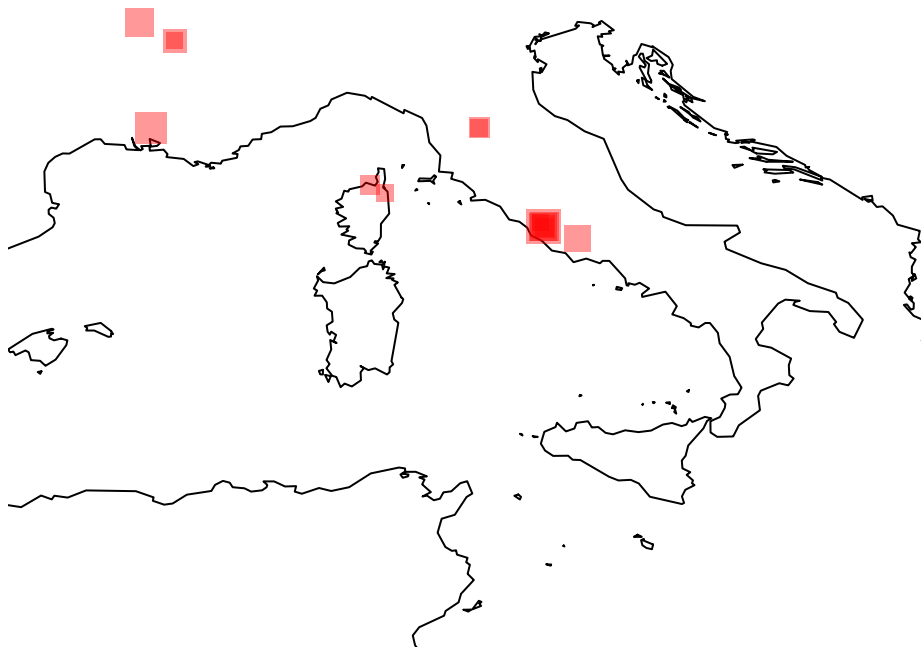

865 cal. AD

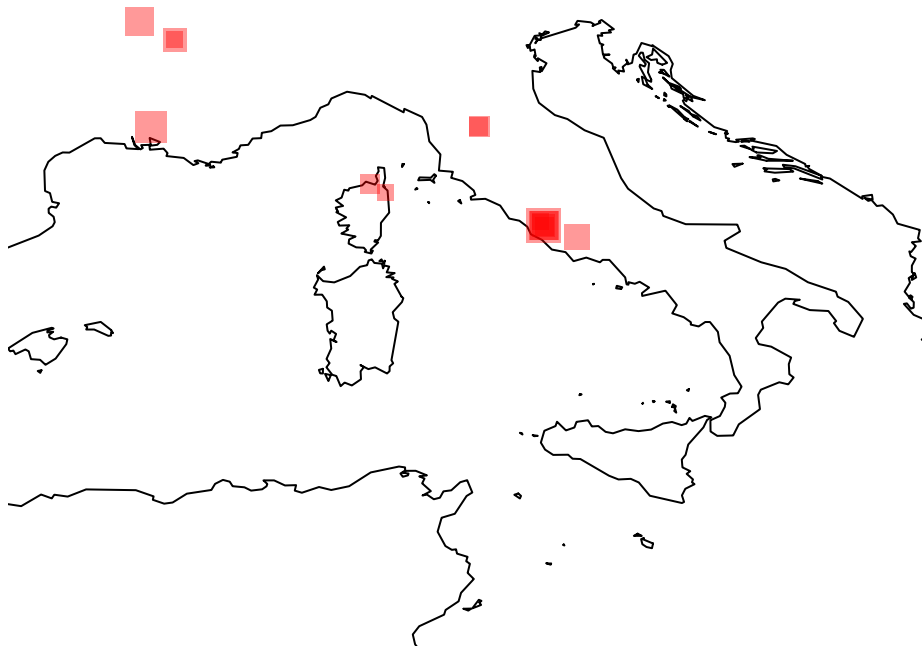

870 cal. AD

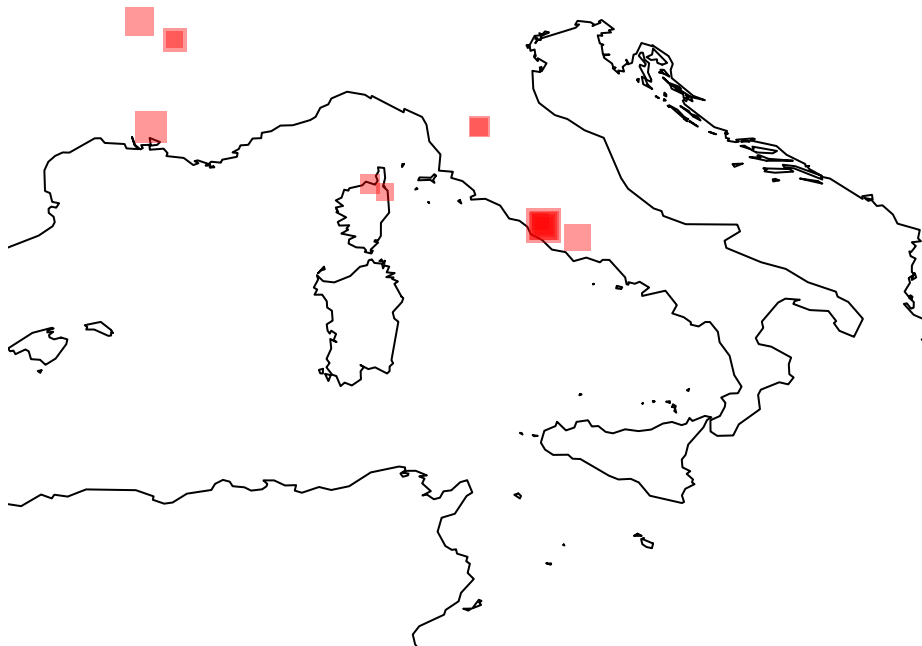



875 cal. AD

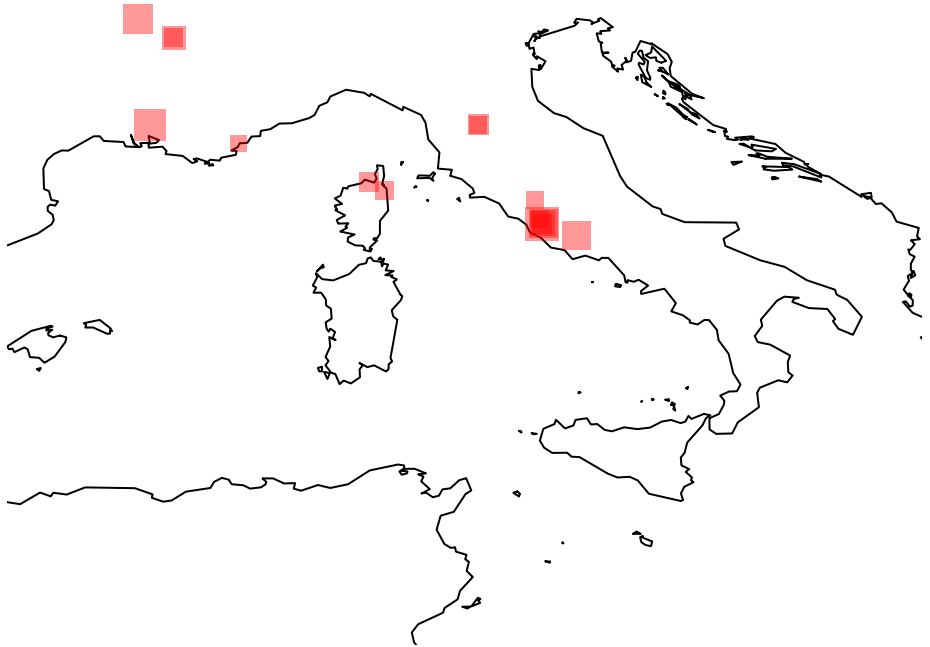

880 cal. AD

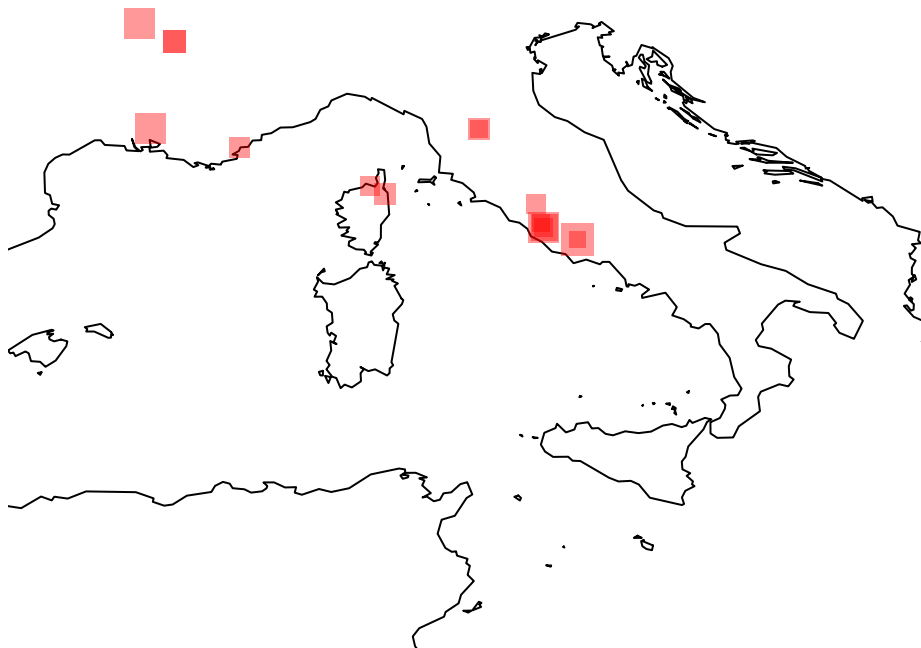

885 cal. AD

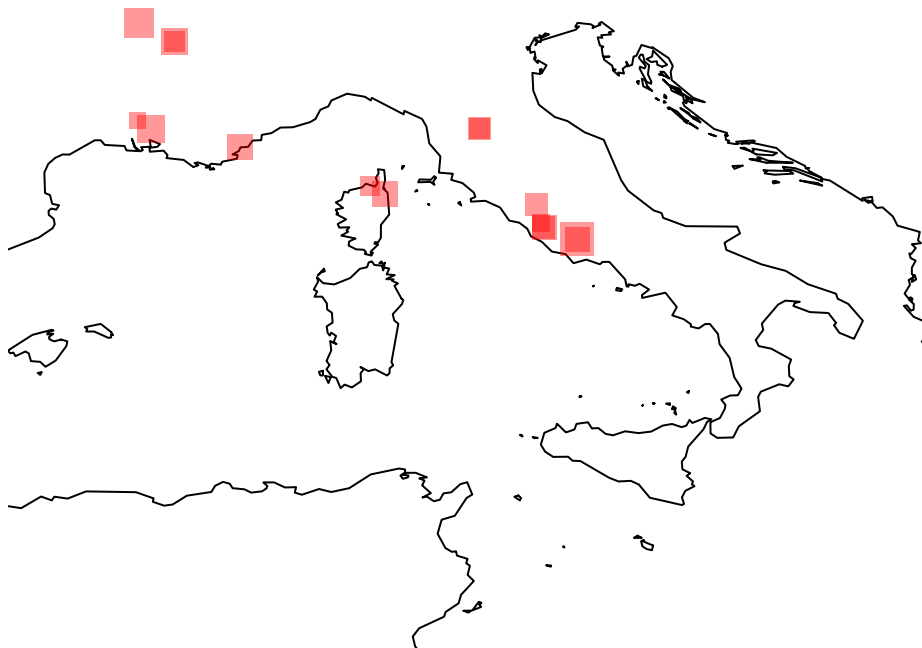

890 cal. AD

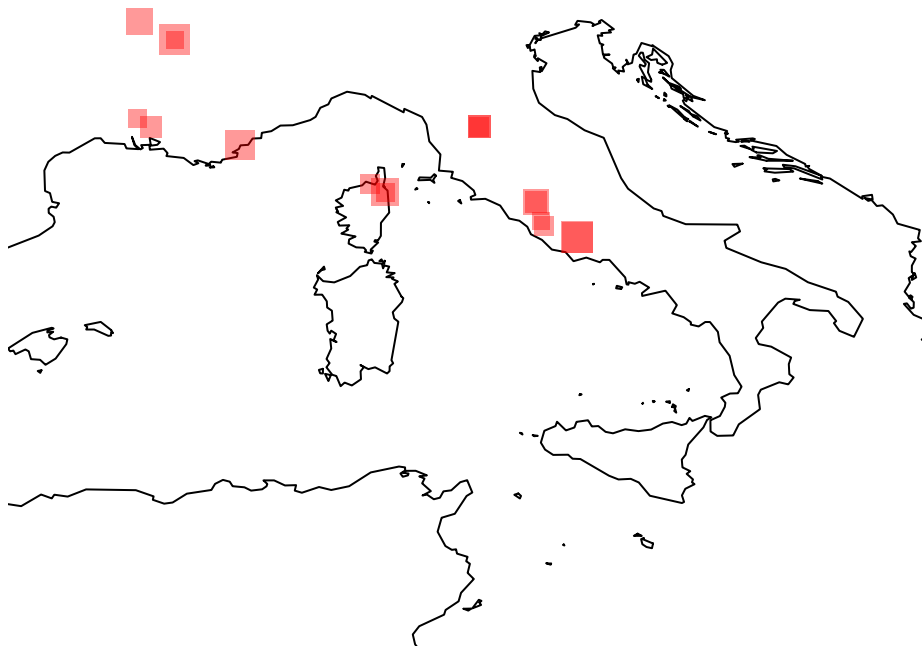

895 cal. AD

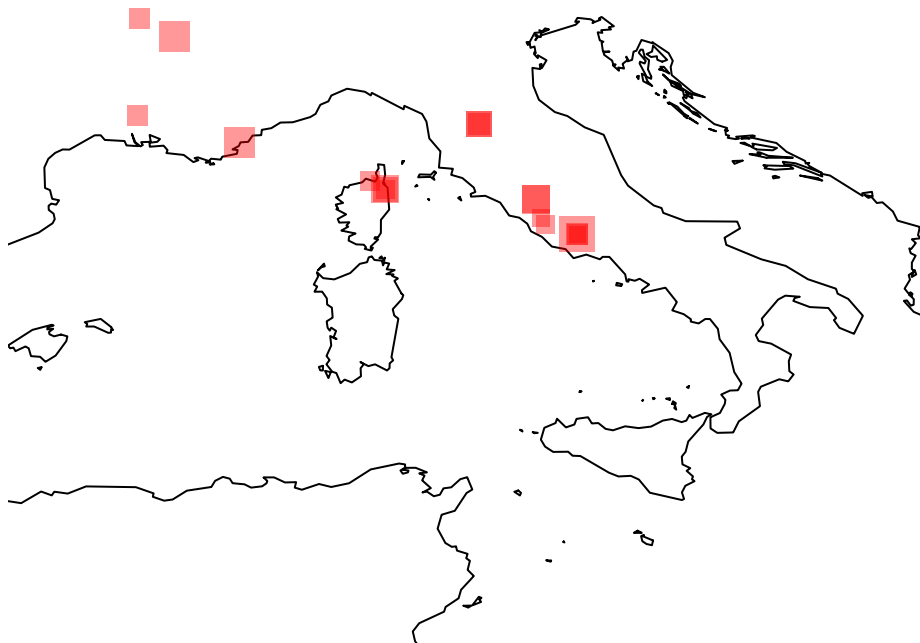

900 cal. AD

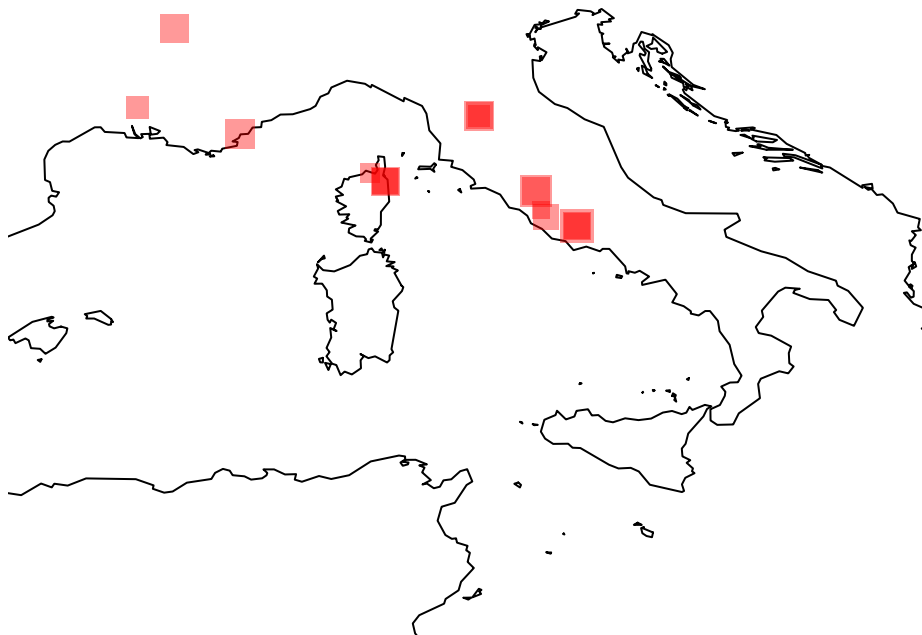

905 cal. AD

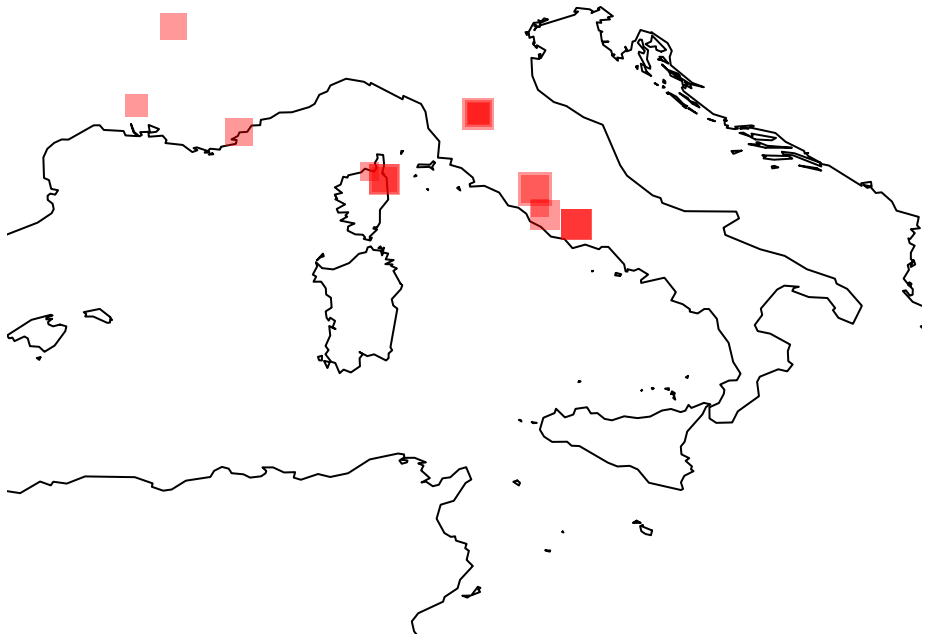

910 cal. AD

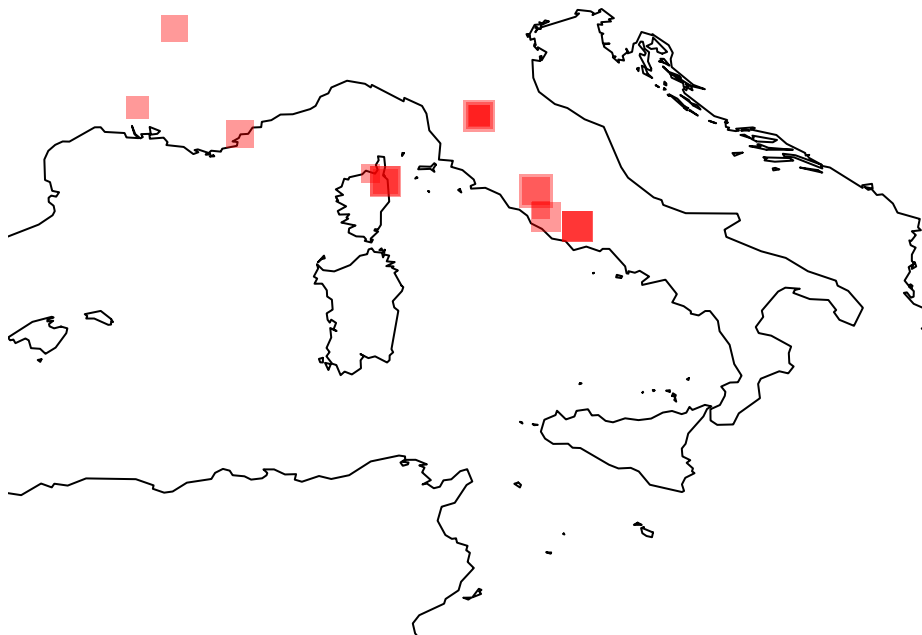



915 cal. AD

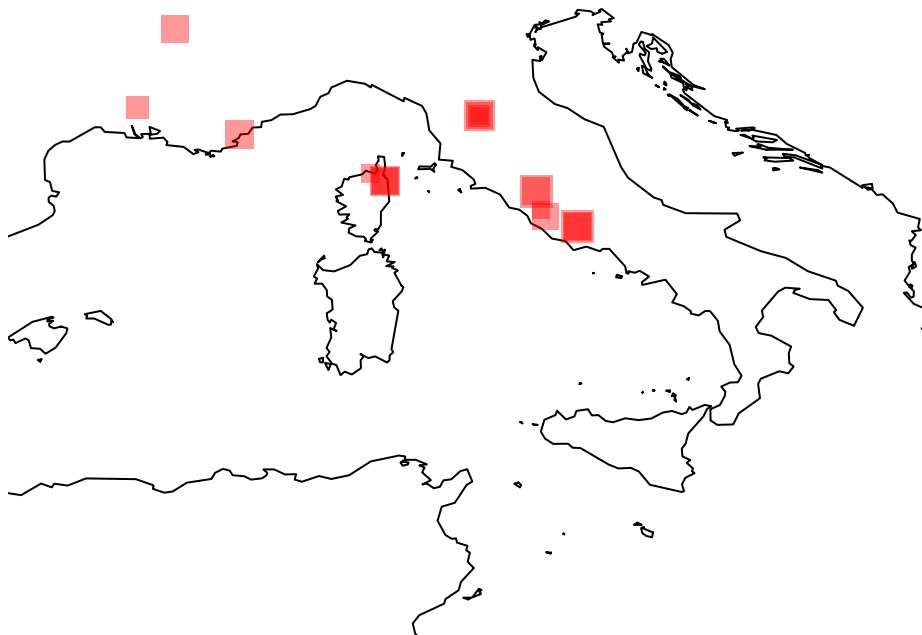

920 cal. AD

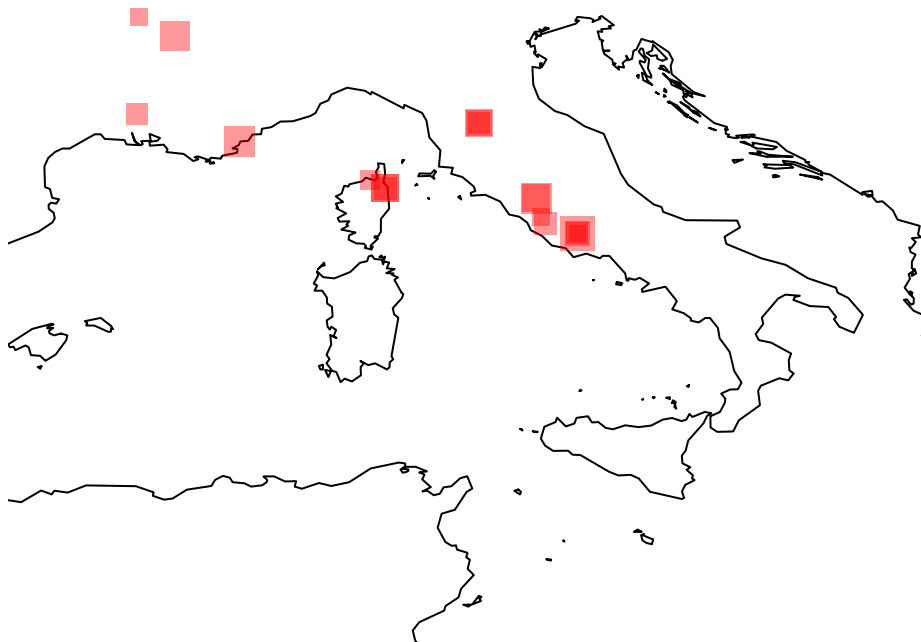

925 cal. AD

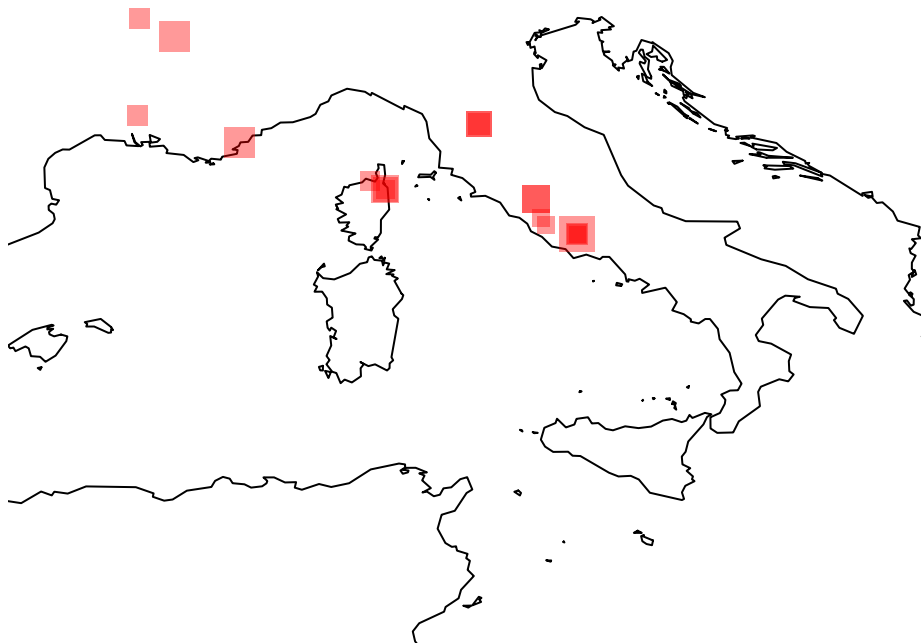

930 cal. AD

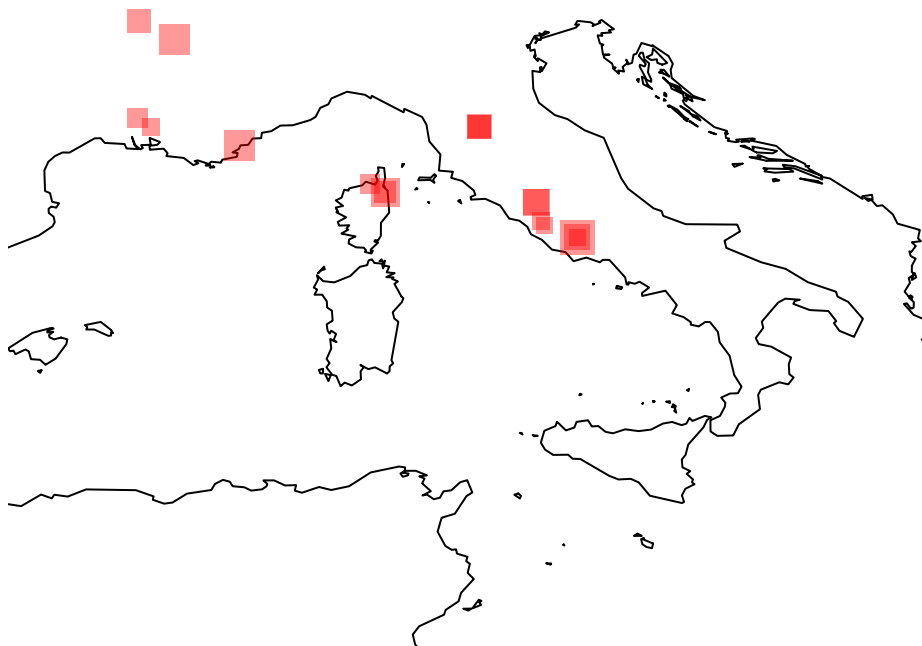

935 cal. AD

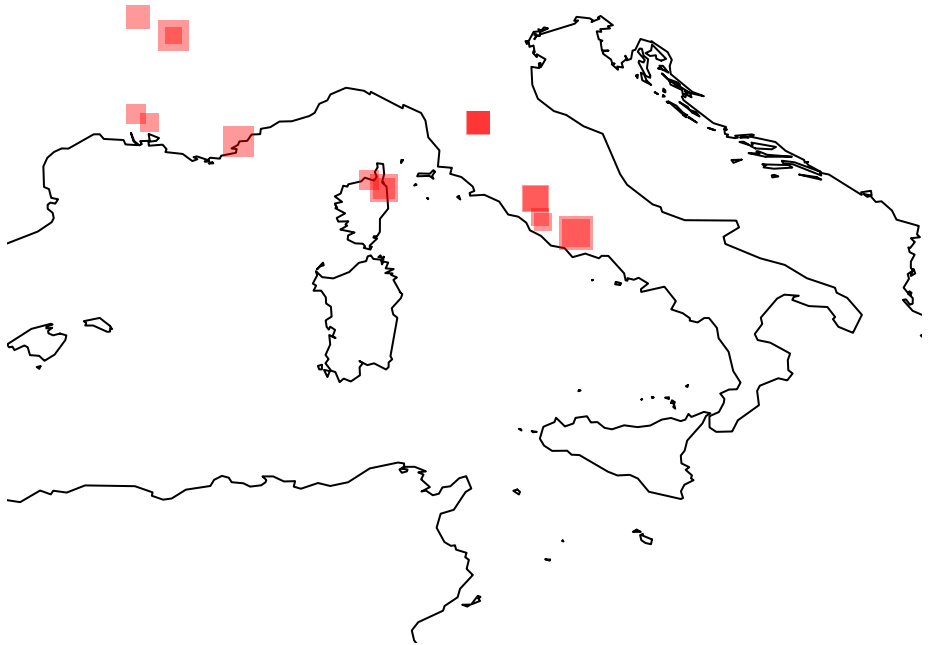

940 cal. AD

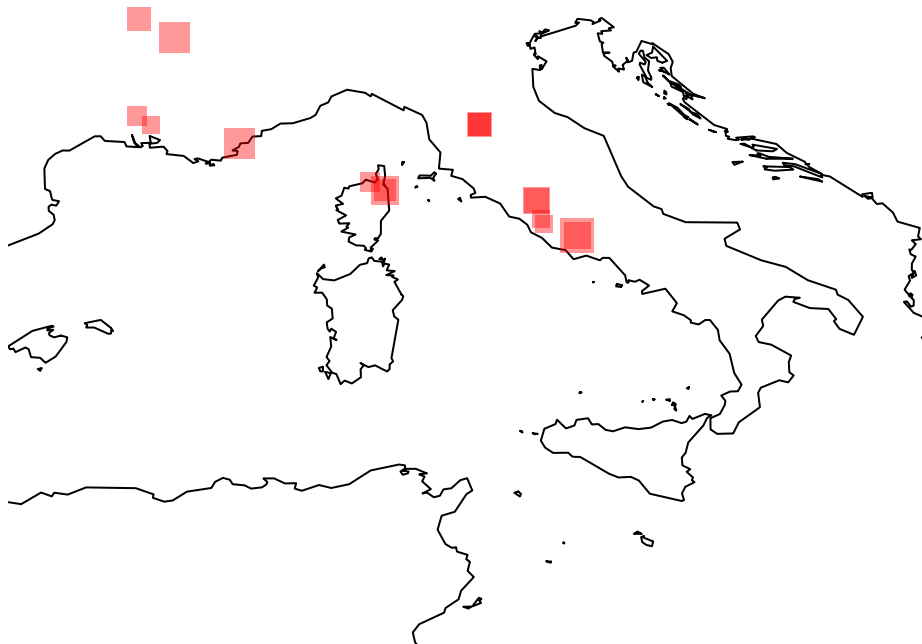

945 cal. AD

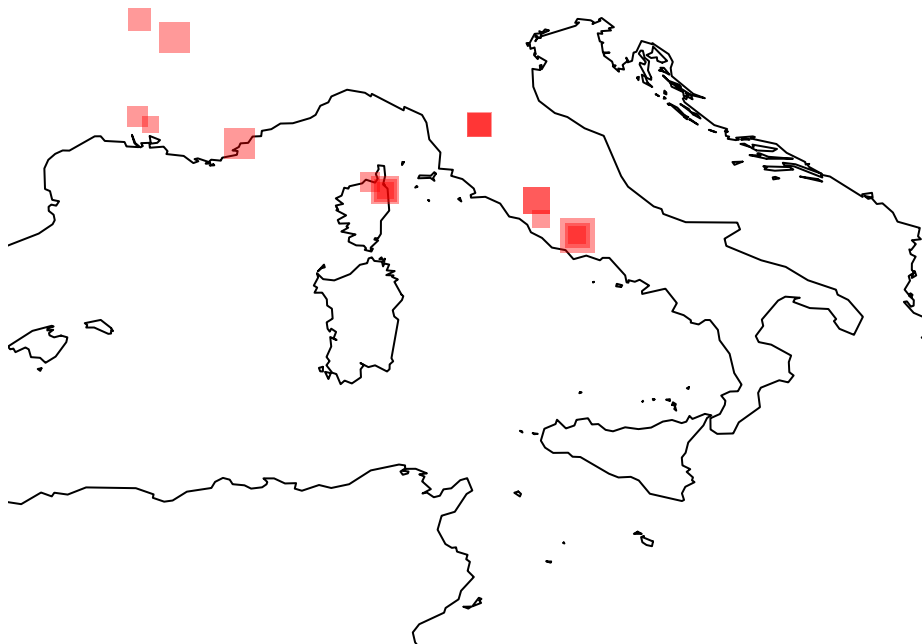

950 cal. AD

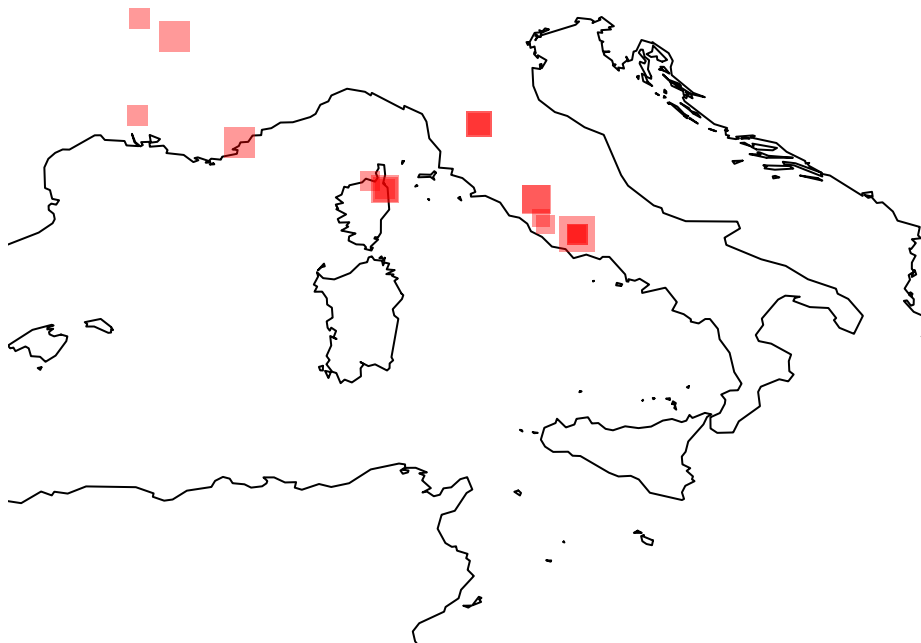



955 cal. AD

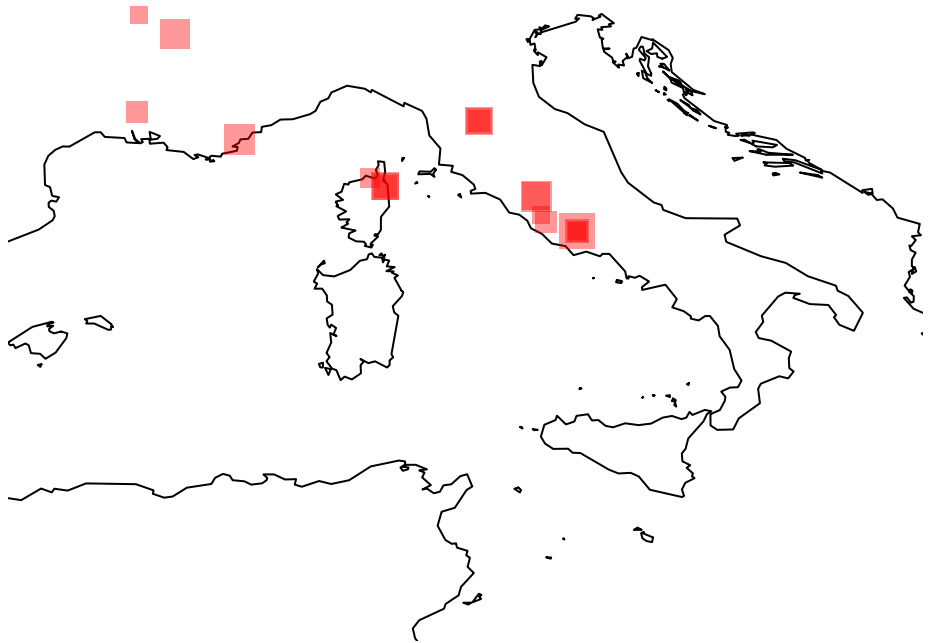

960 cal. AD

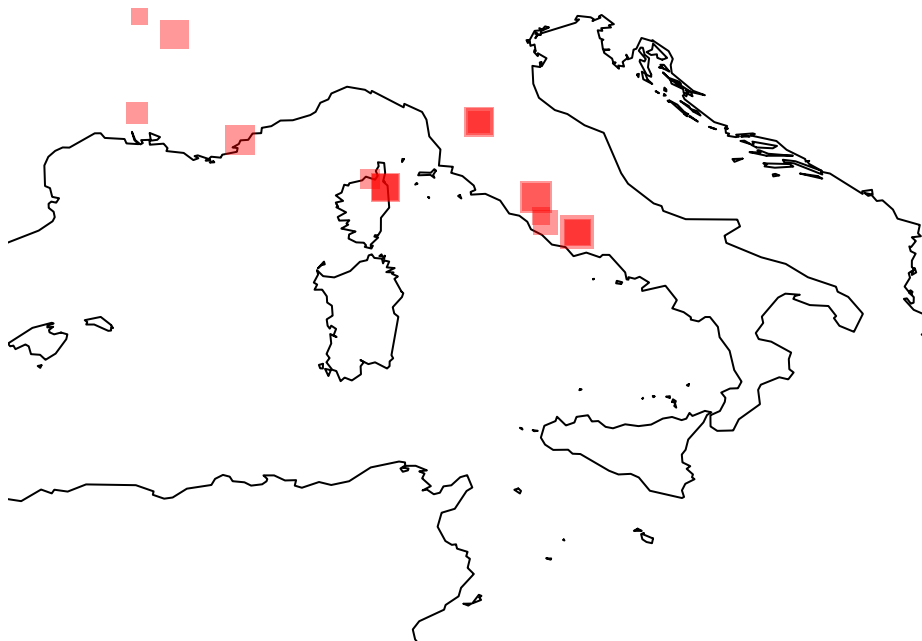

965 cal. AD

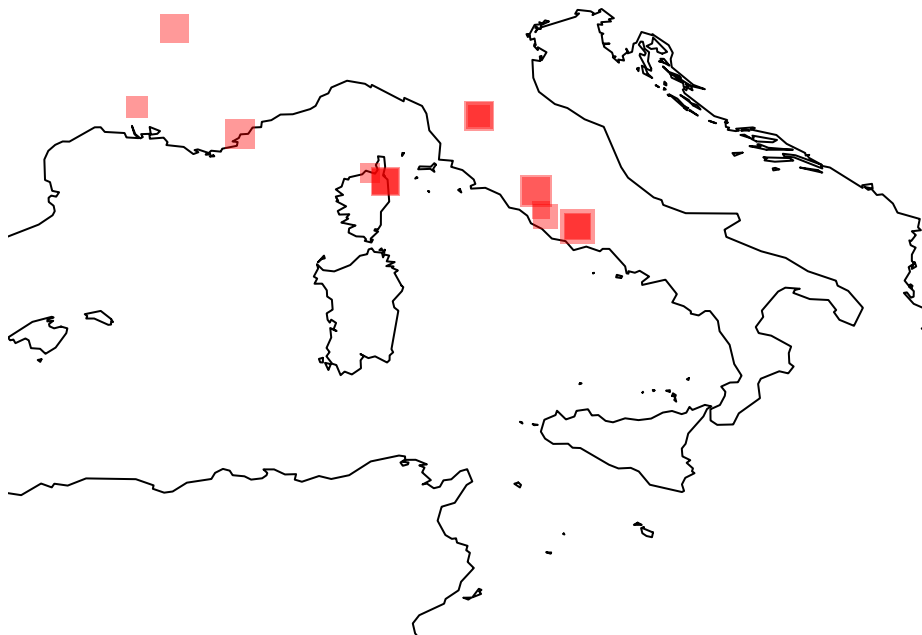



975 cal. AD

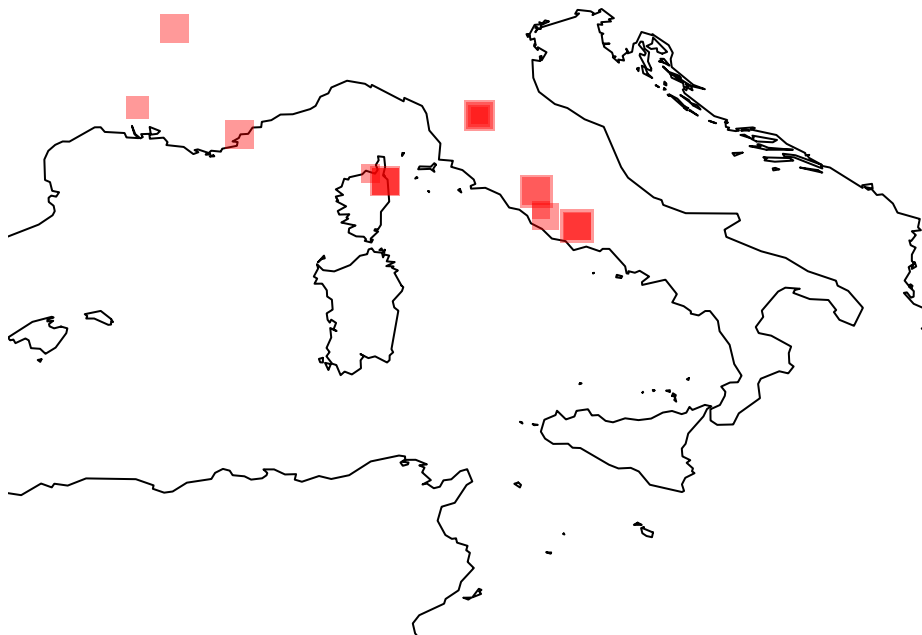

980 cal. AD

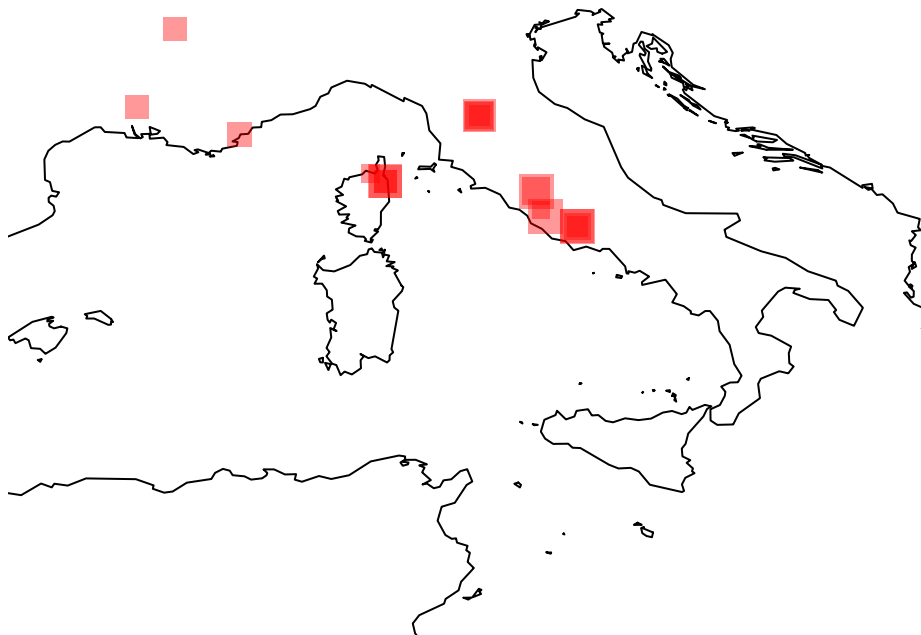

985 cal. AD

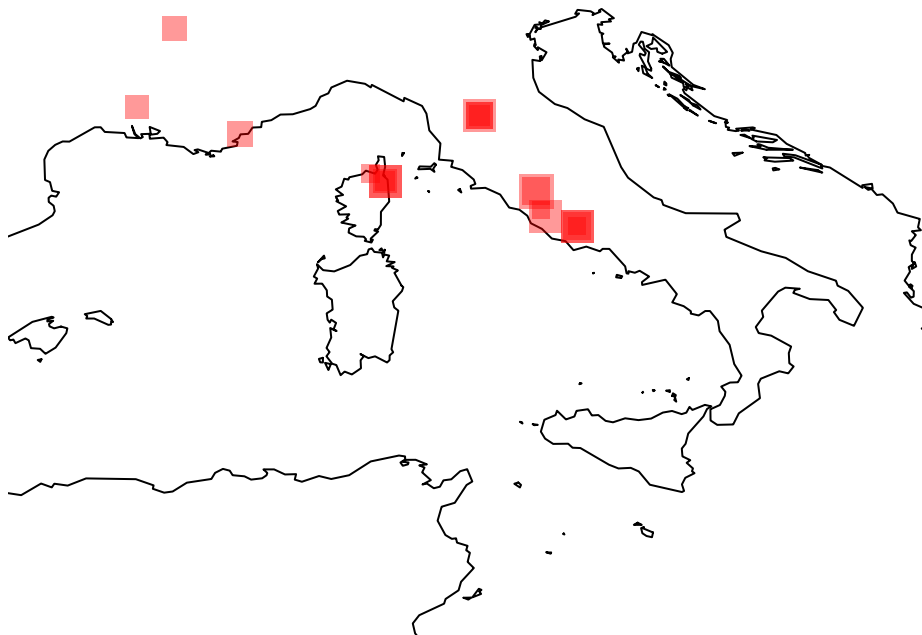

990 cal. AD

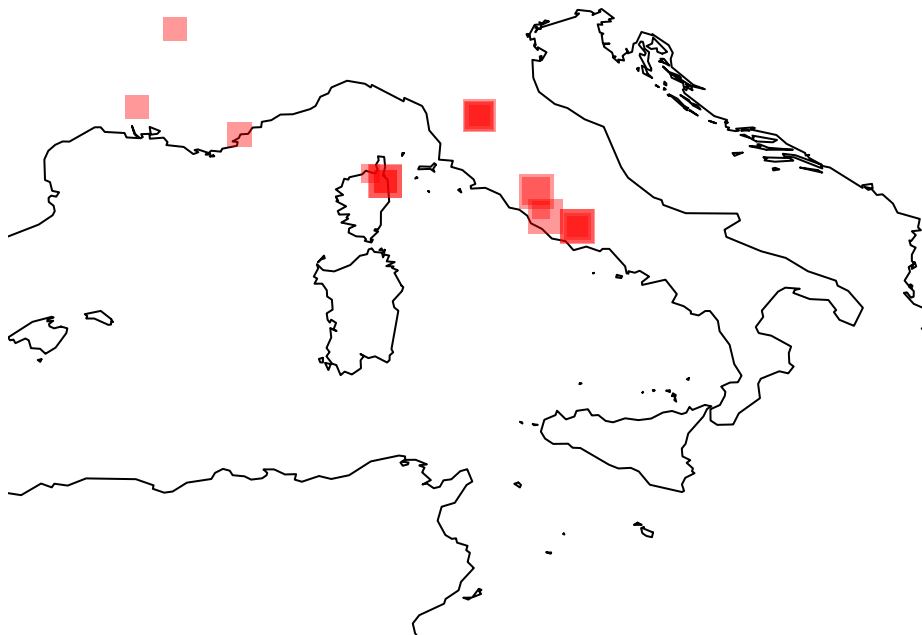



995 cal. AD

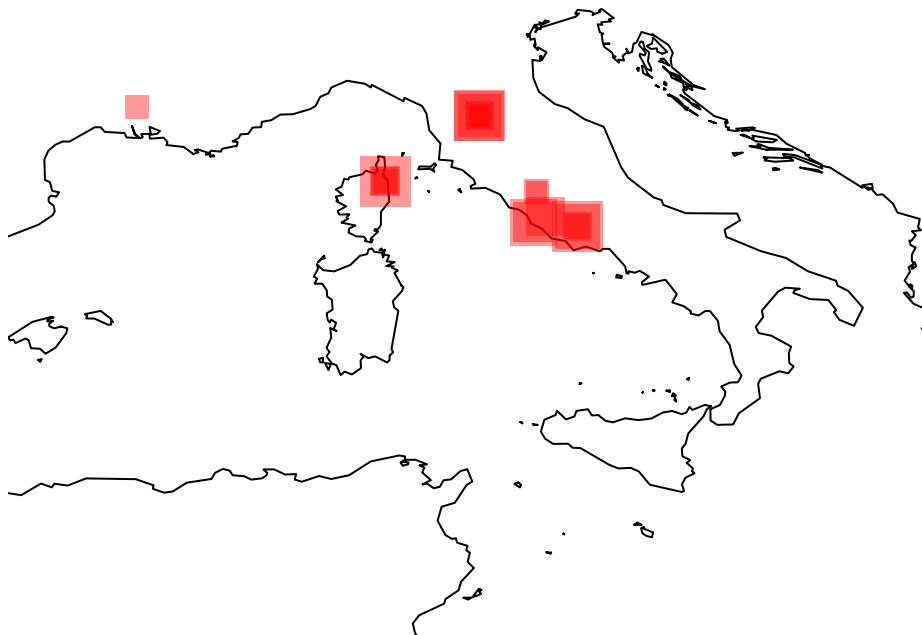

1000 cal. AD

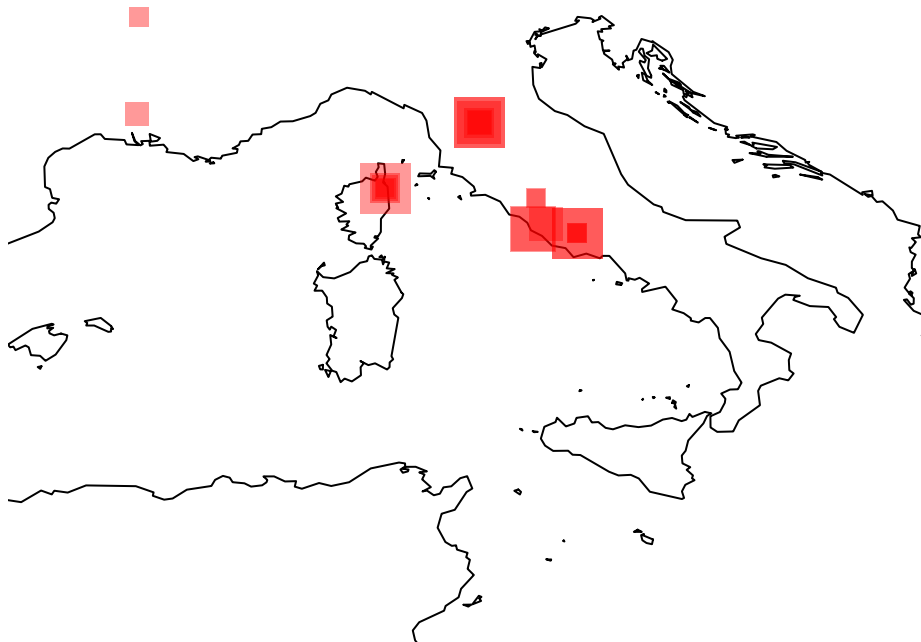

1005 cal. AD

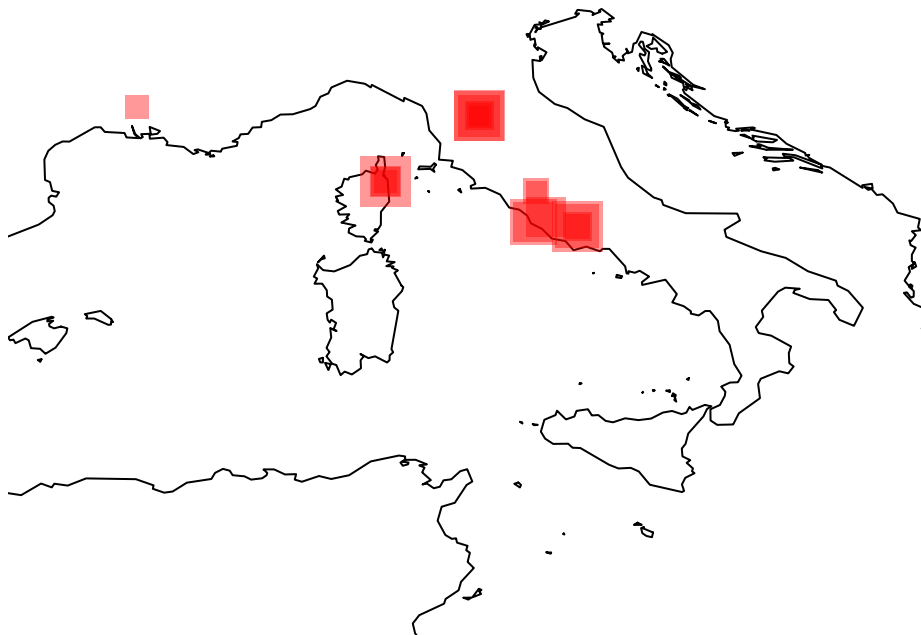

1010 cal. AD

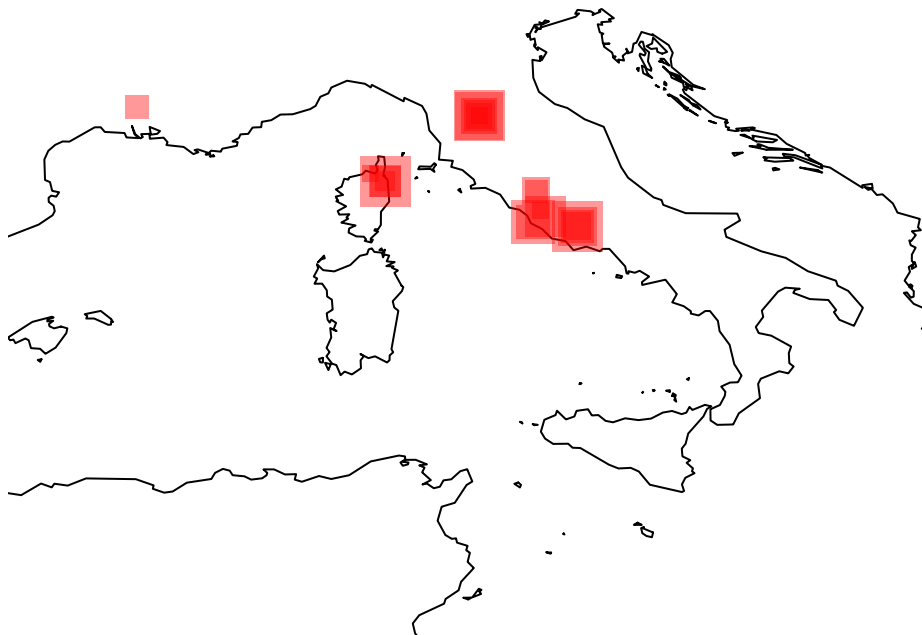

1015 cal. AD

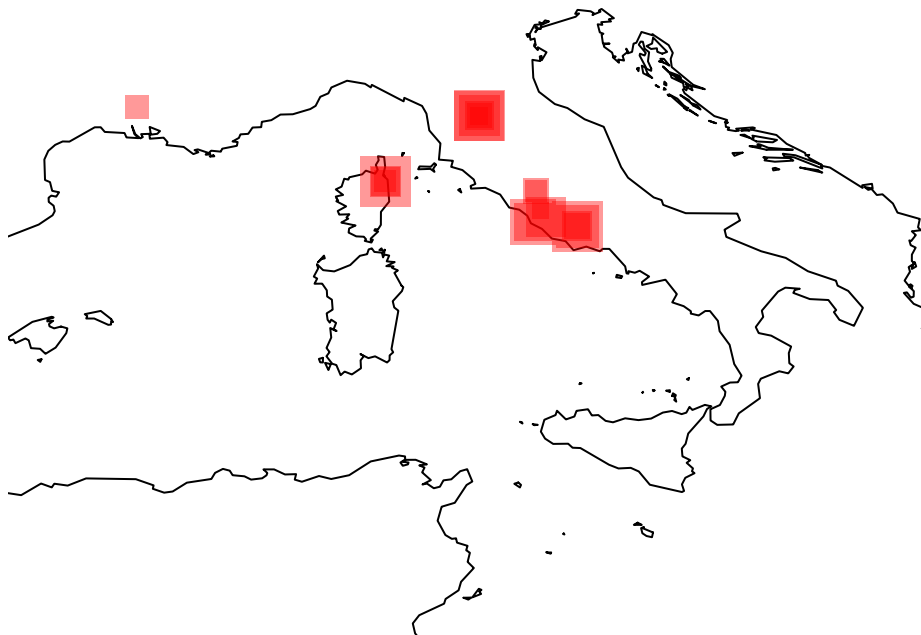

1020 cal. AD

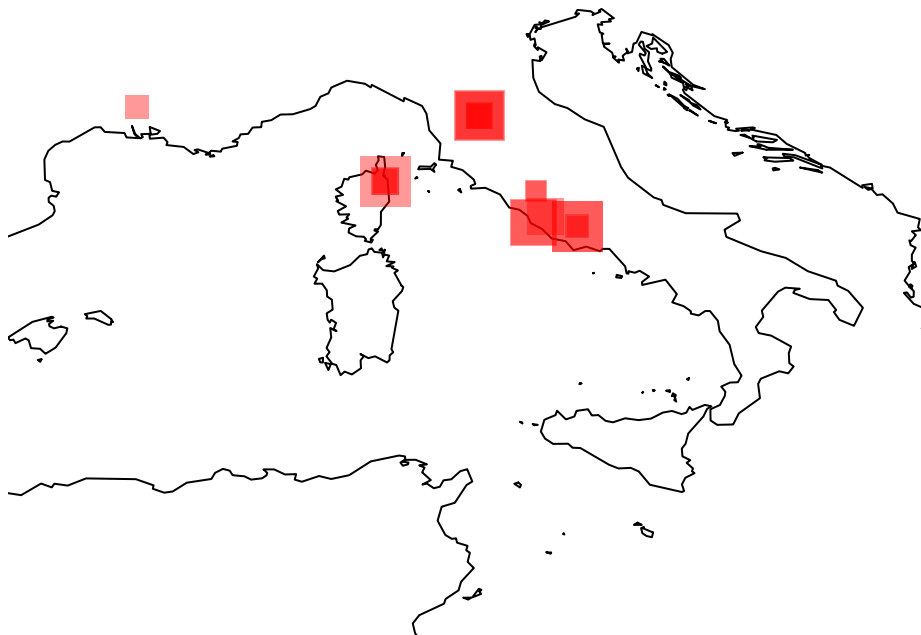

1025 cal. AD

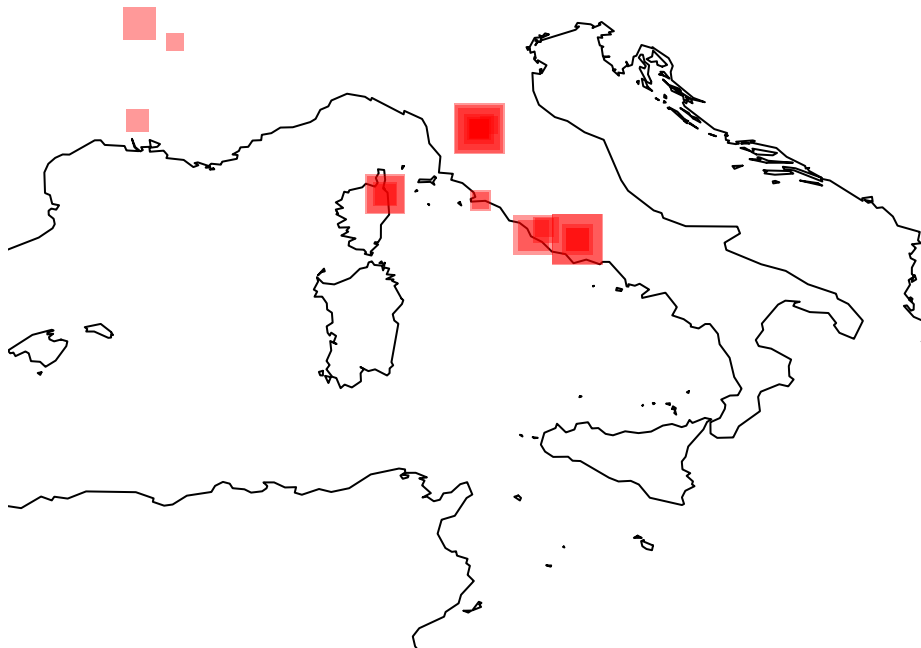

1030 cal. AD

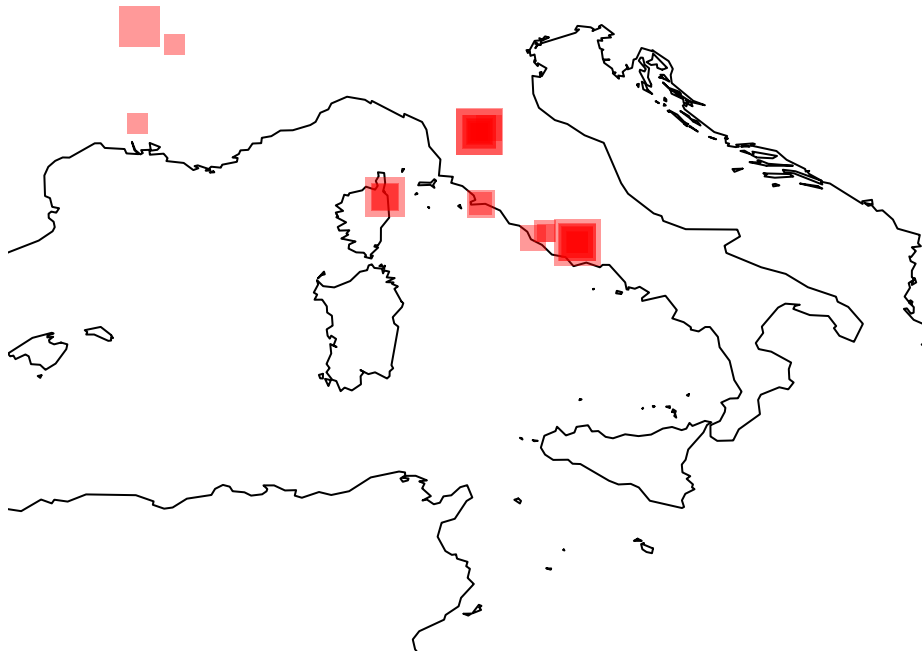



1035 cal. AD

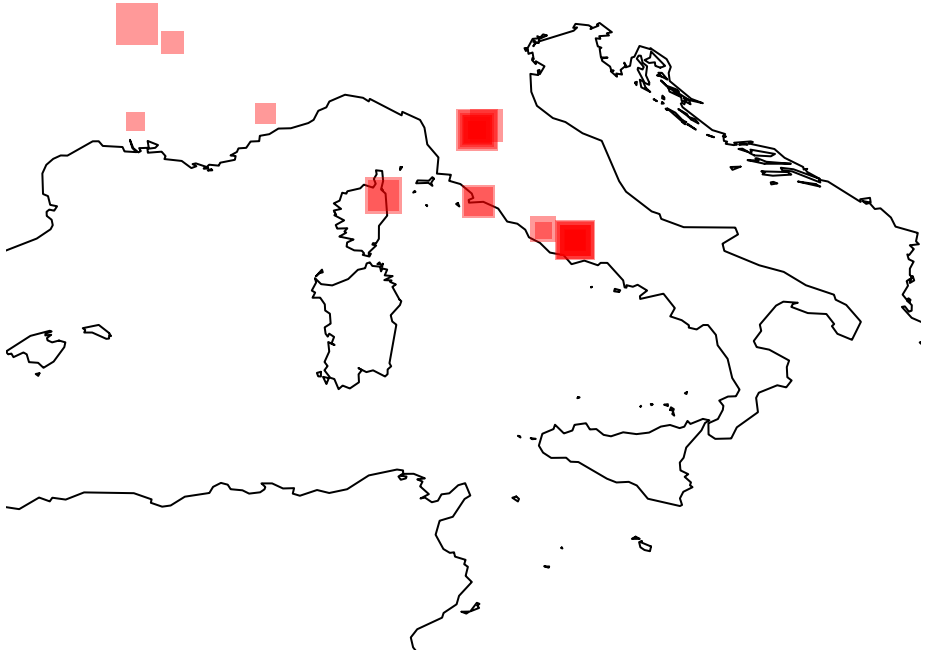

1040 cal. AD

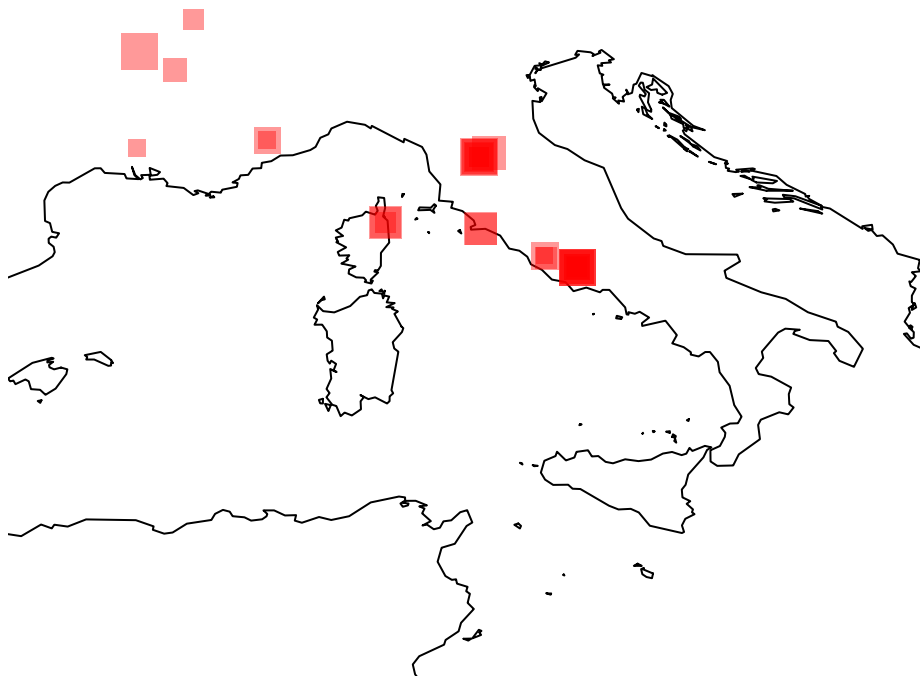



1050 cal. AD

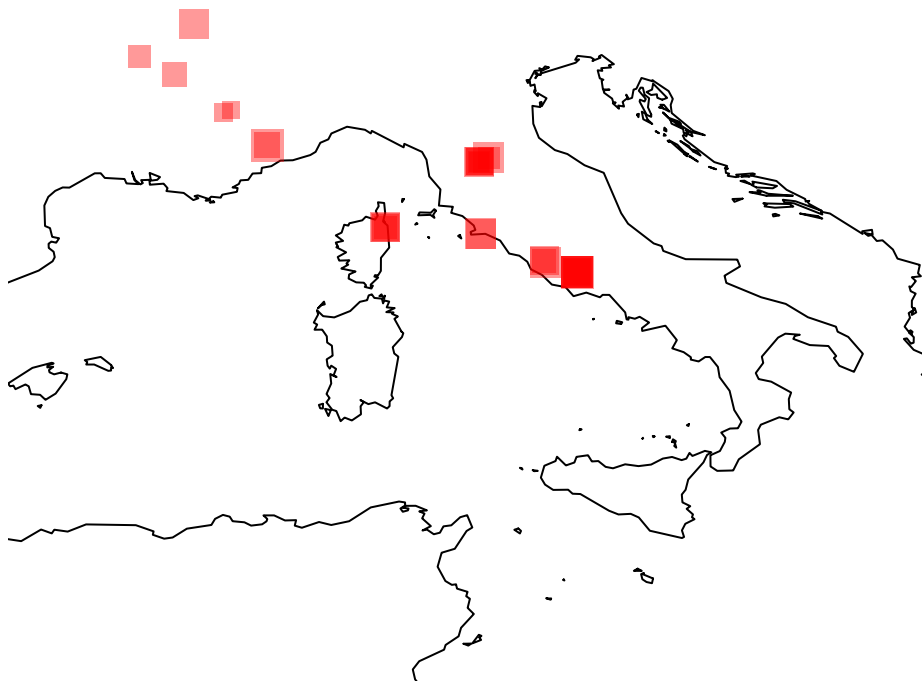



1060 cal. AD

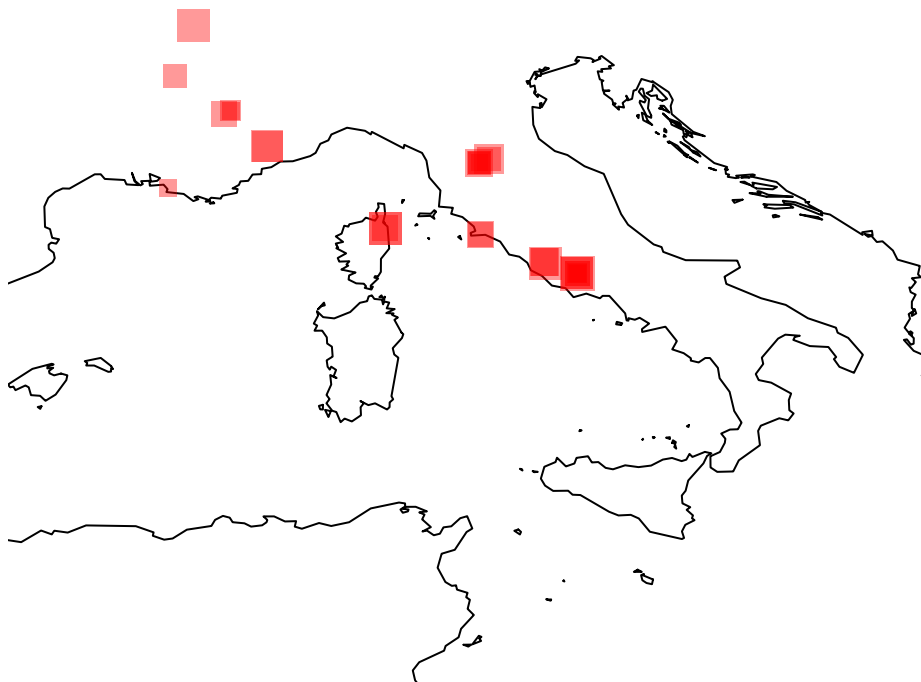

1065 cal. AD

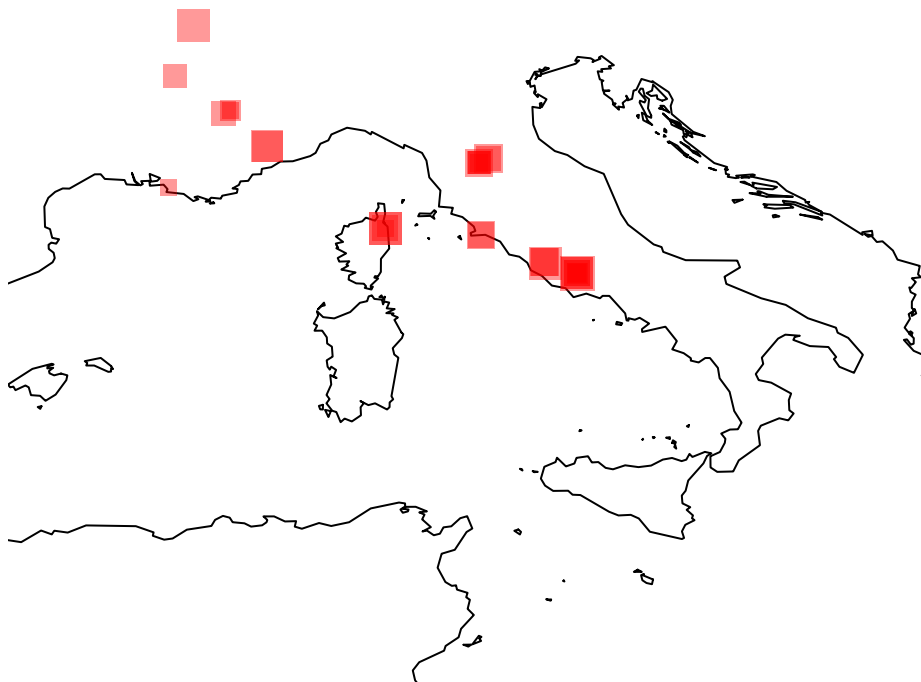

1070 cal. AD

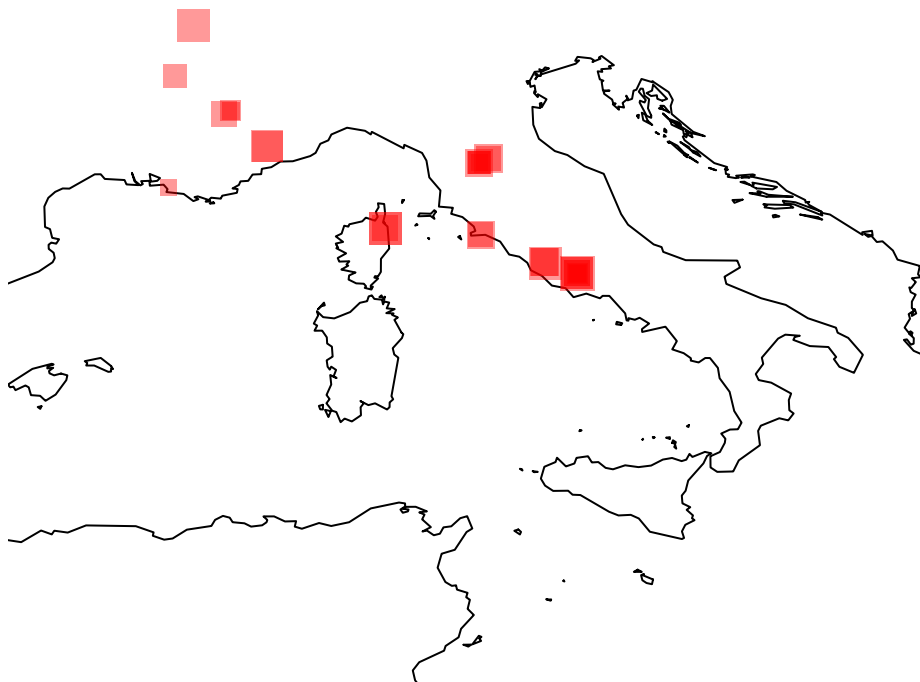



1075 cal. AD

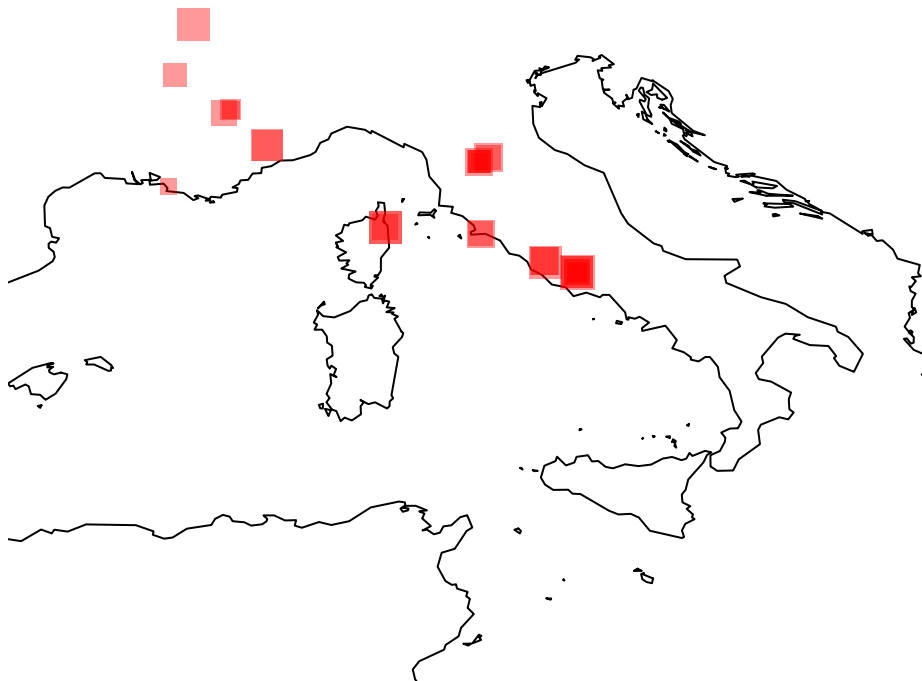

1080 cal. AD

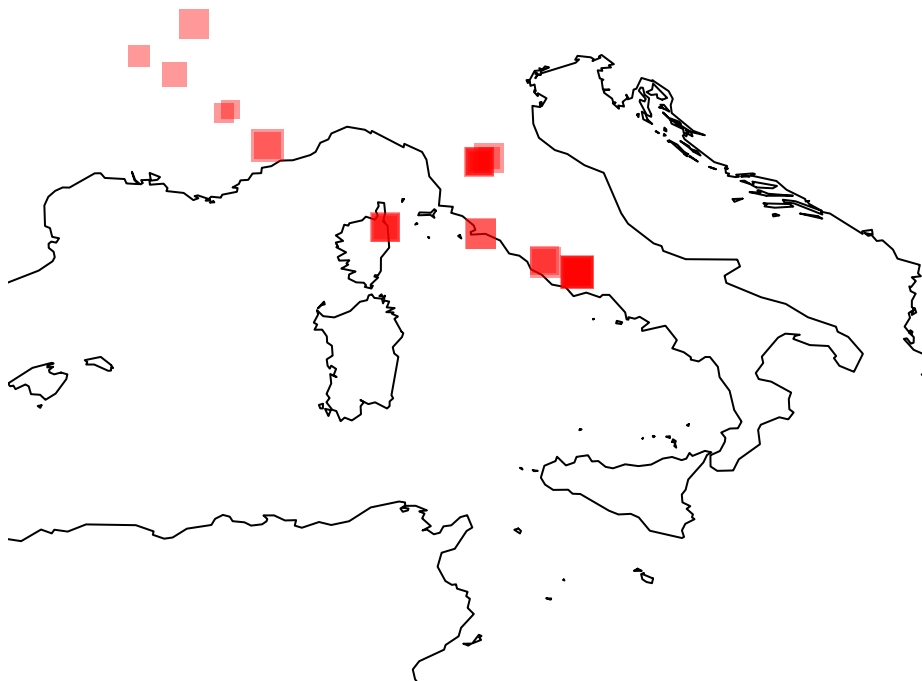

1085 cal. AD

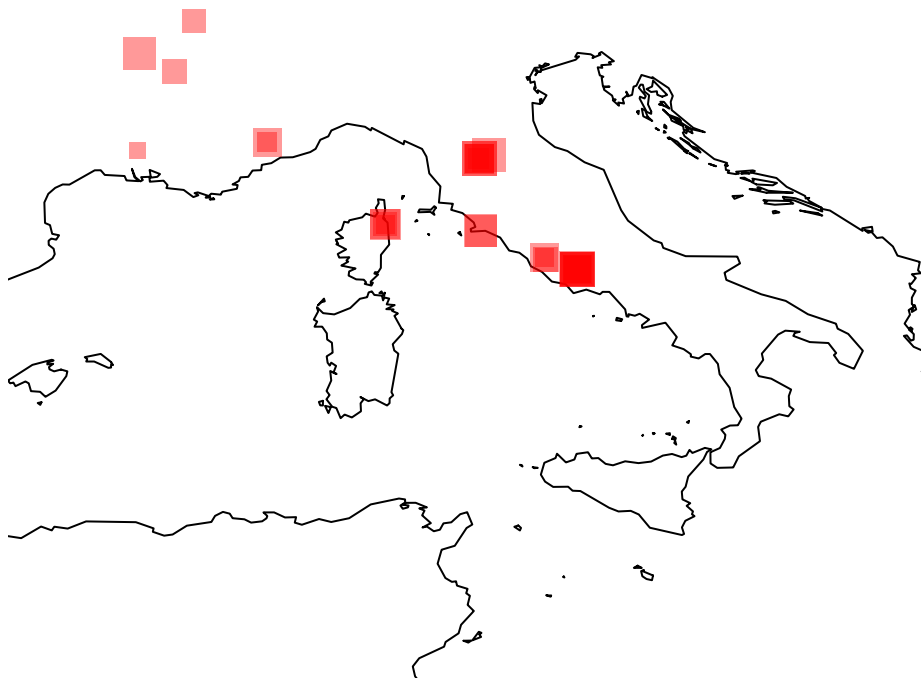

1090 cal. AD

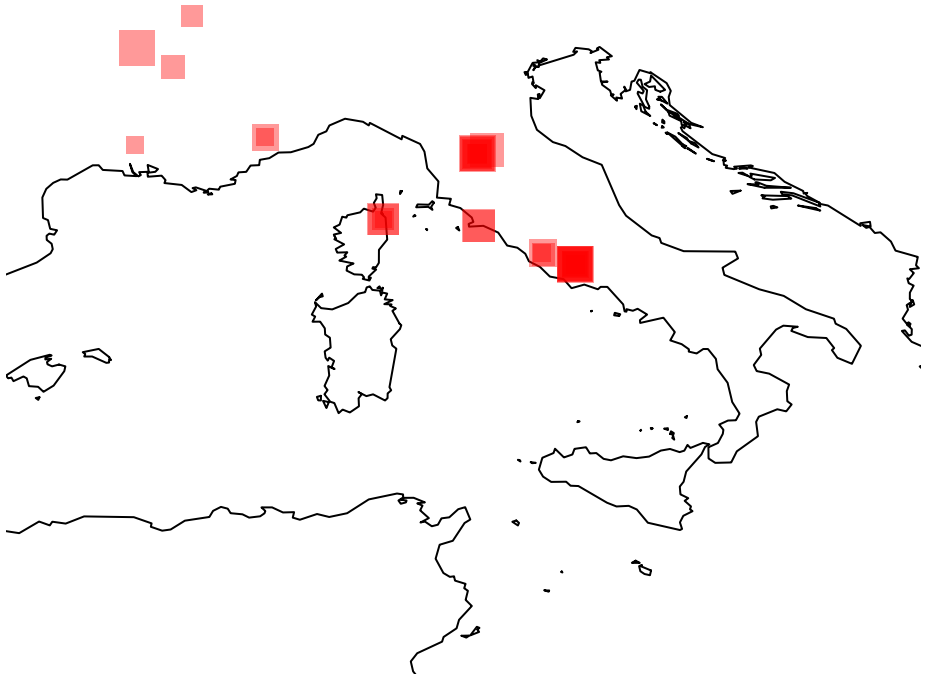

1095 cal. AD

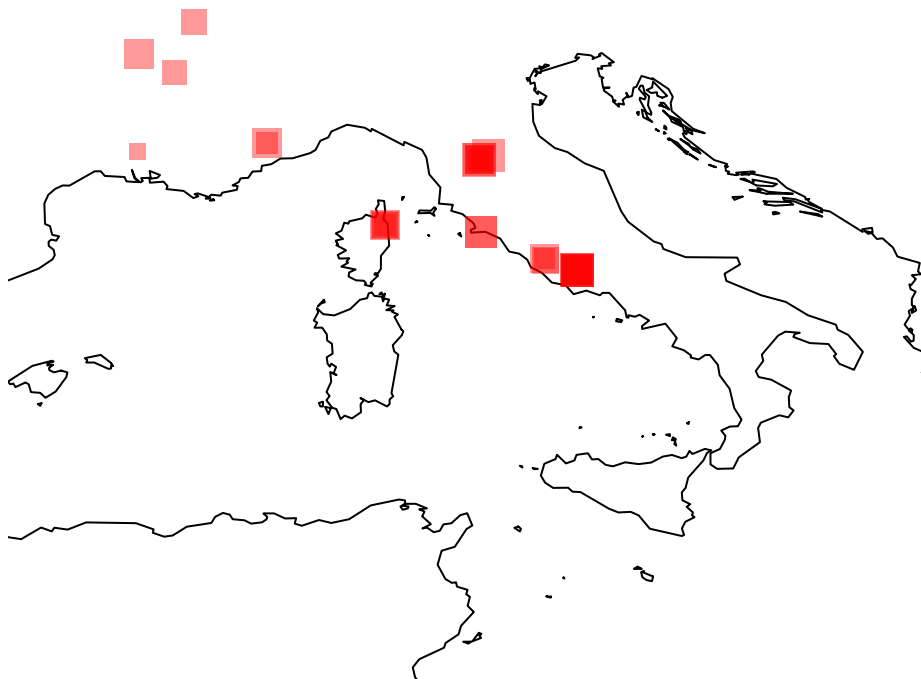

1100 cal. AD

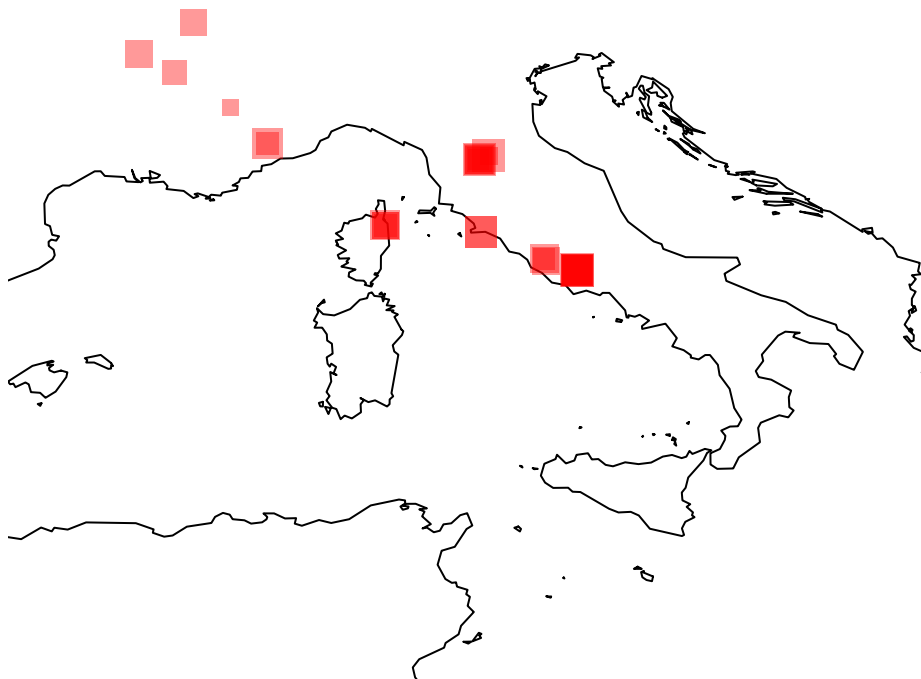



1110 cal. AD

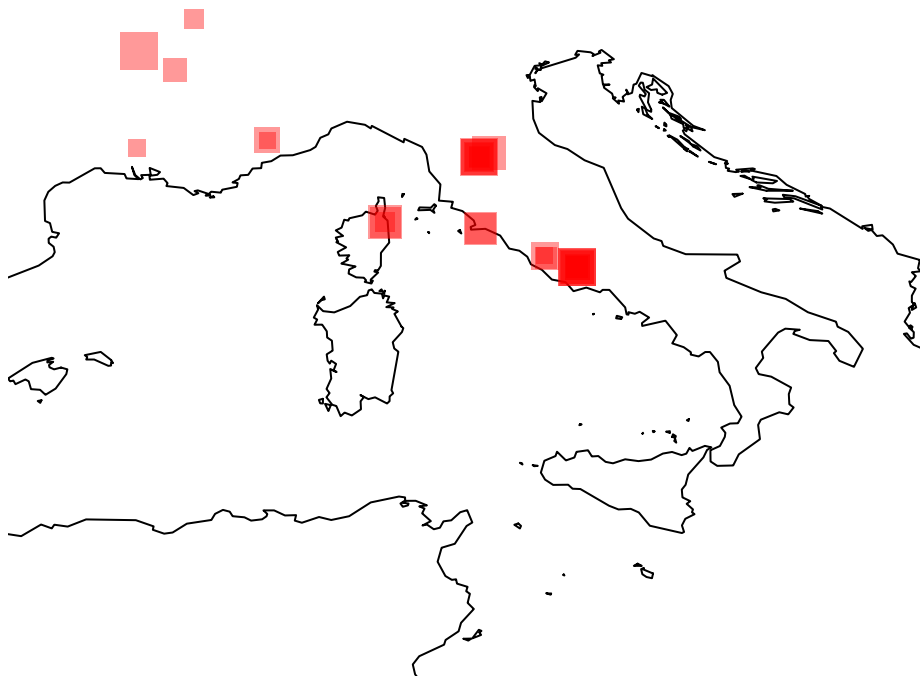



1115 cal. AD

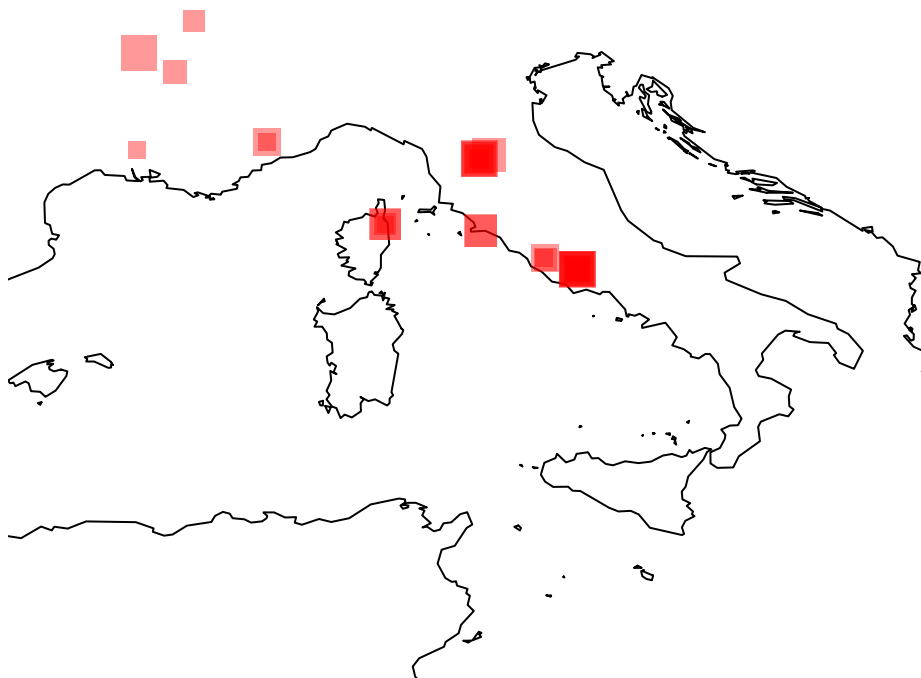



1125 cal. AD

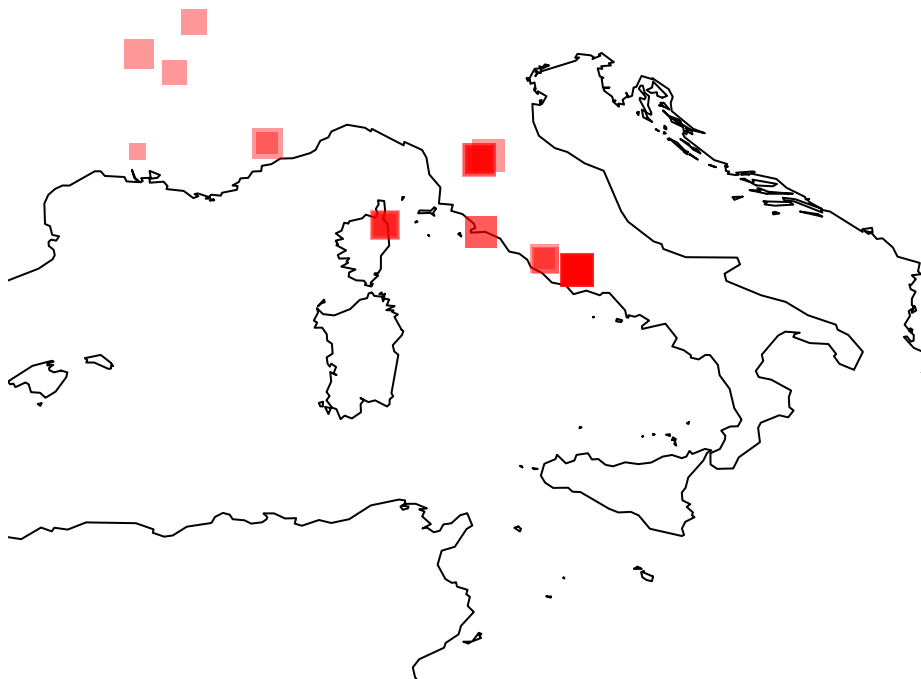

1130 cal. AD

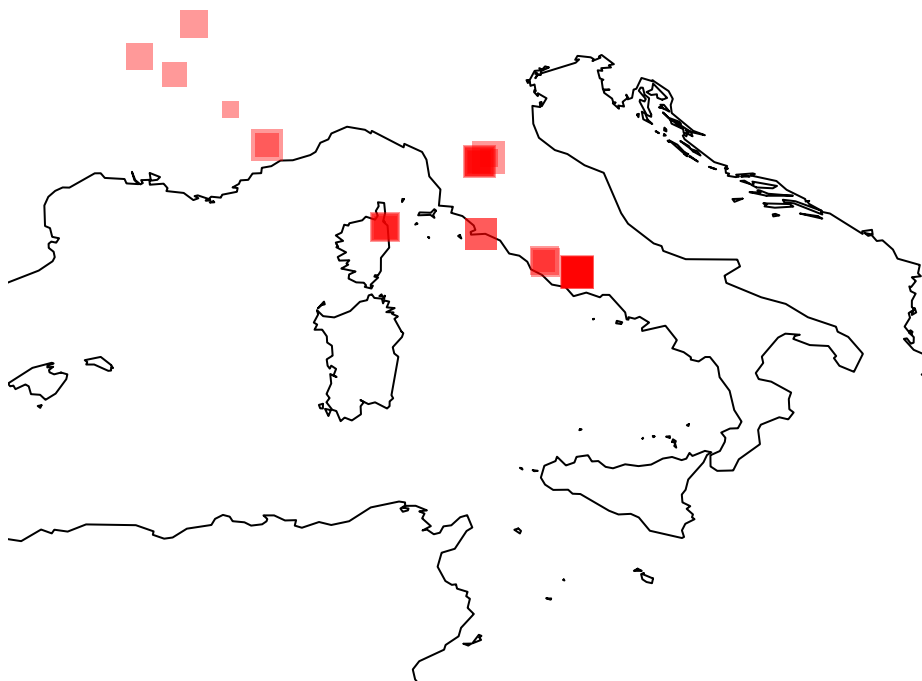

1135 cal. AD

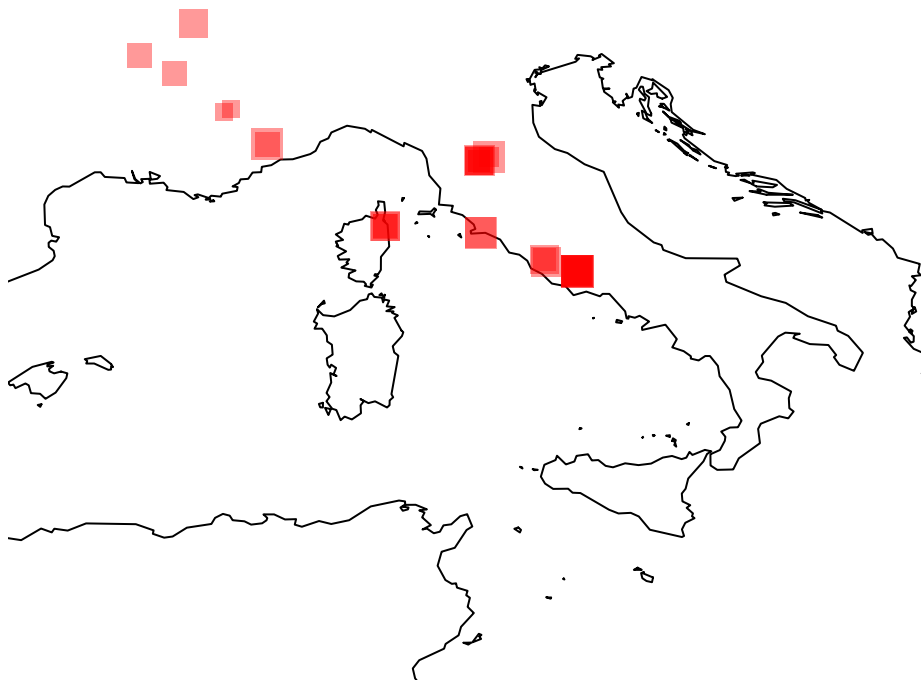

1140 cal. AD

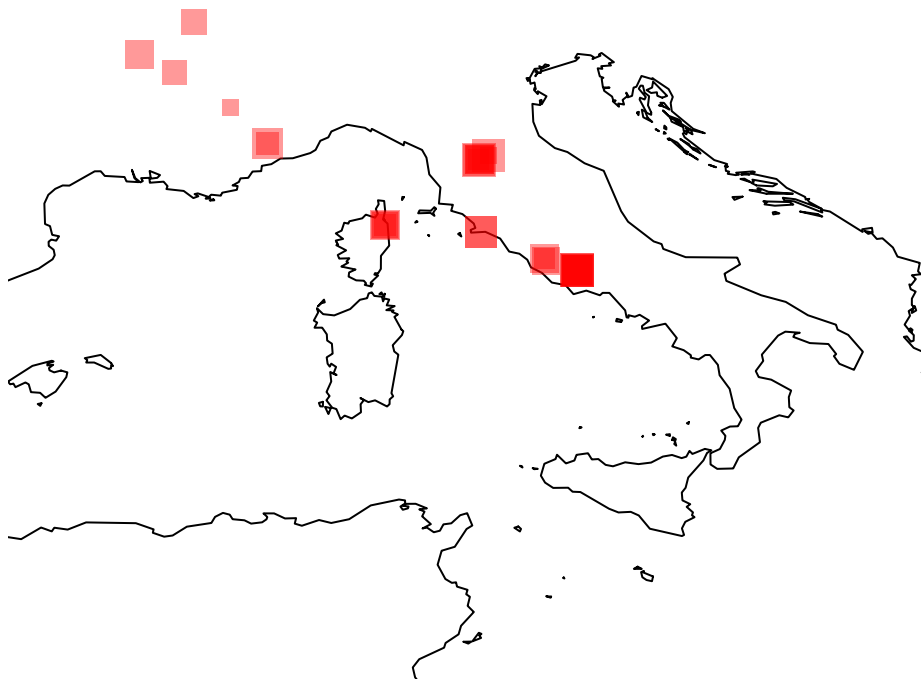

1145 cal. AD

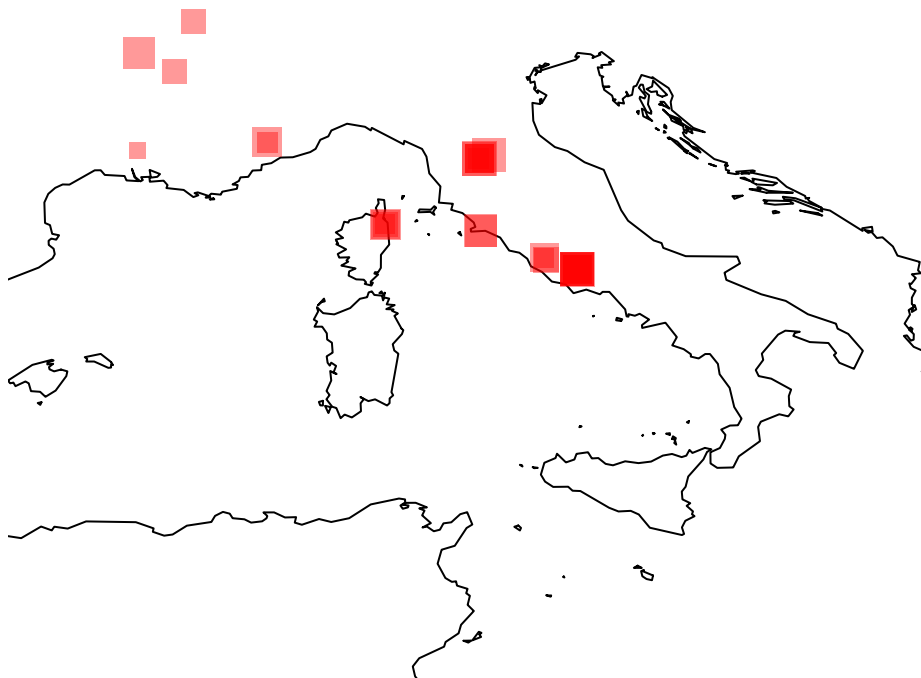

1150 cal. AD







1160 cal. AD

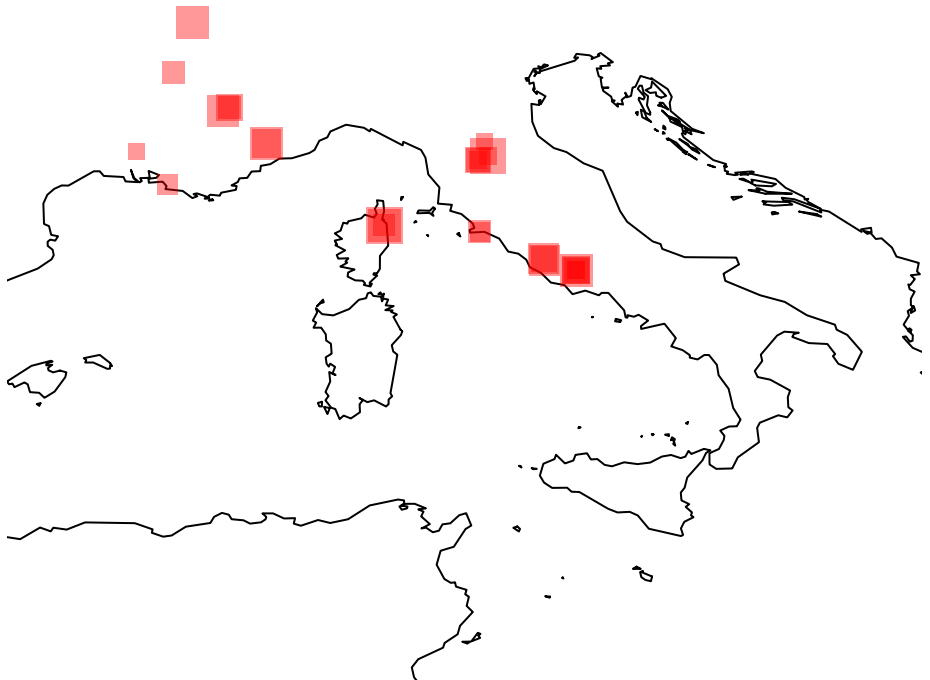

1165 cal. AD

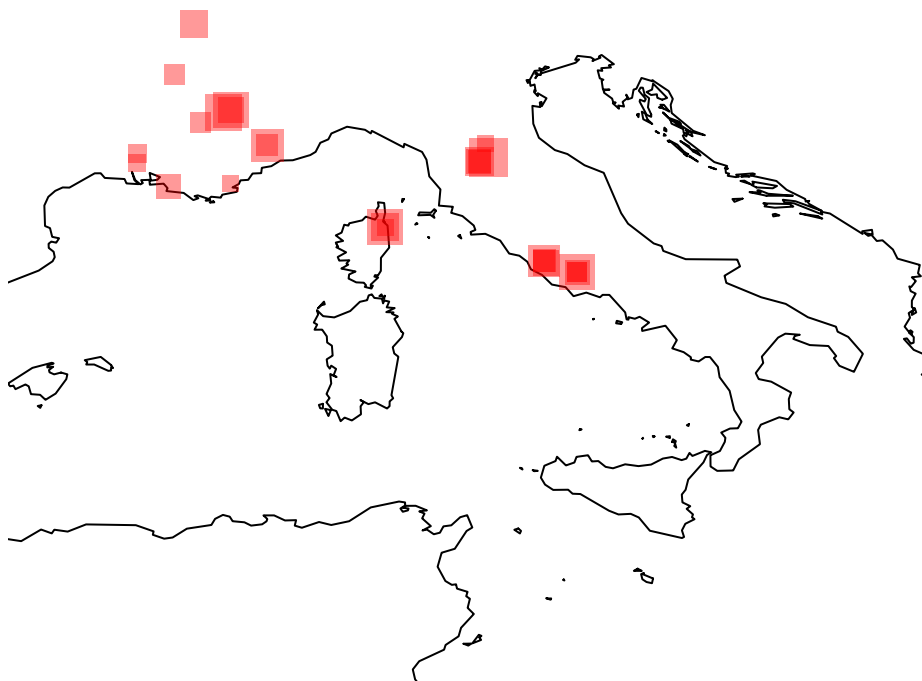

1170 cal. AD

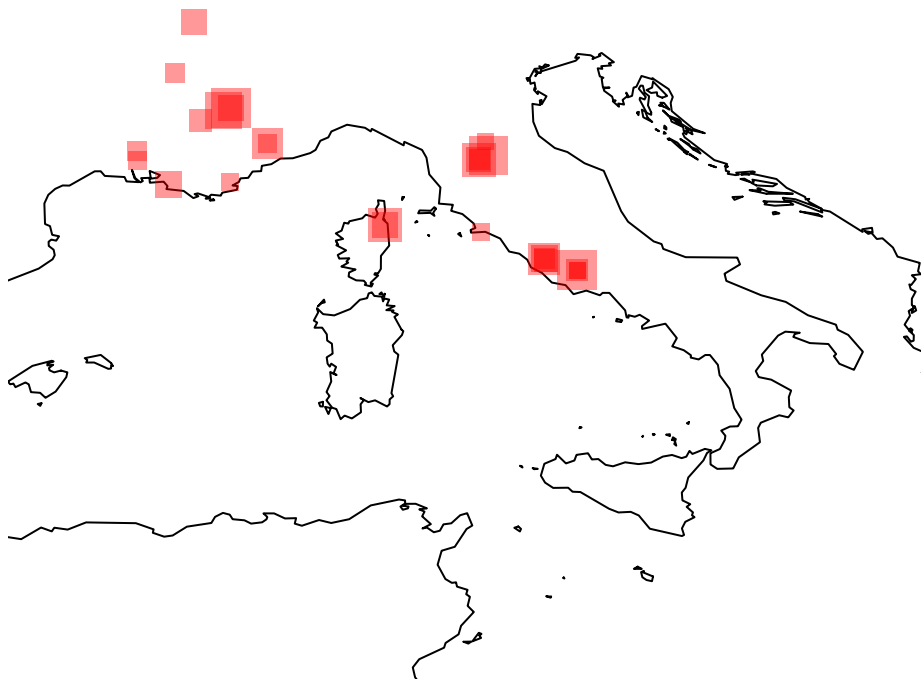

1175 cal. AD

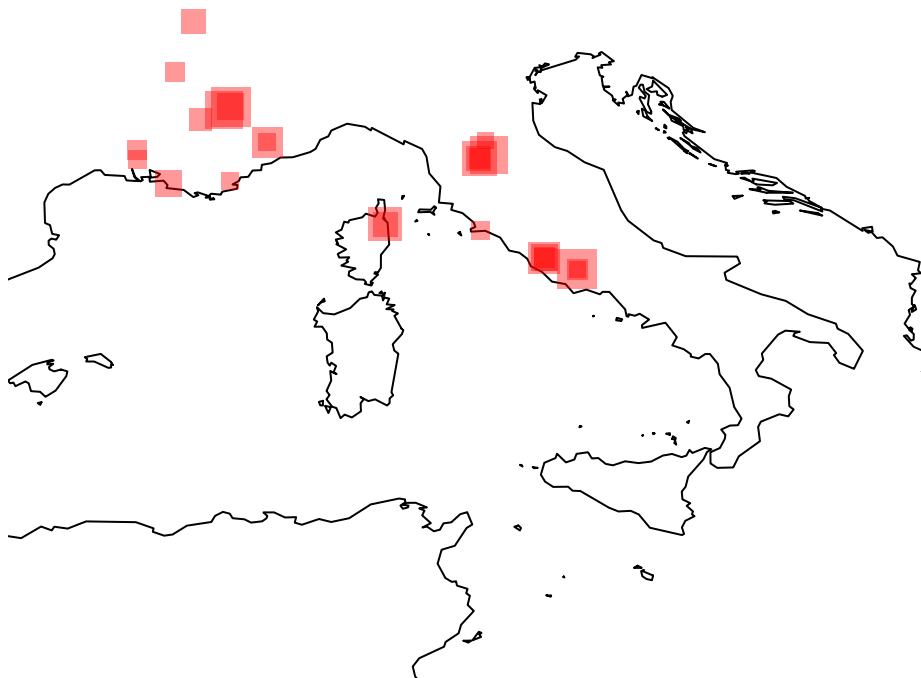

1180 cal. AD

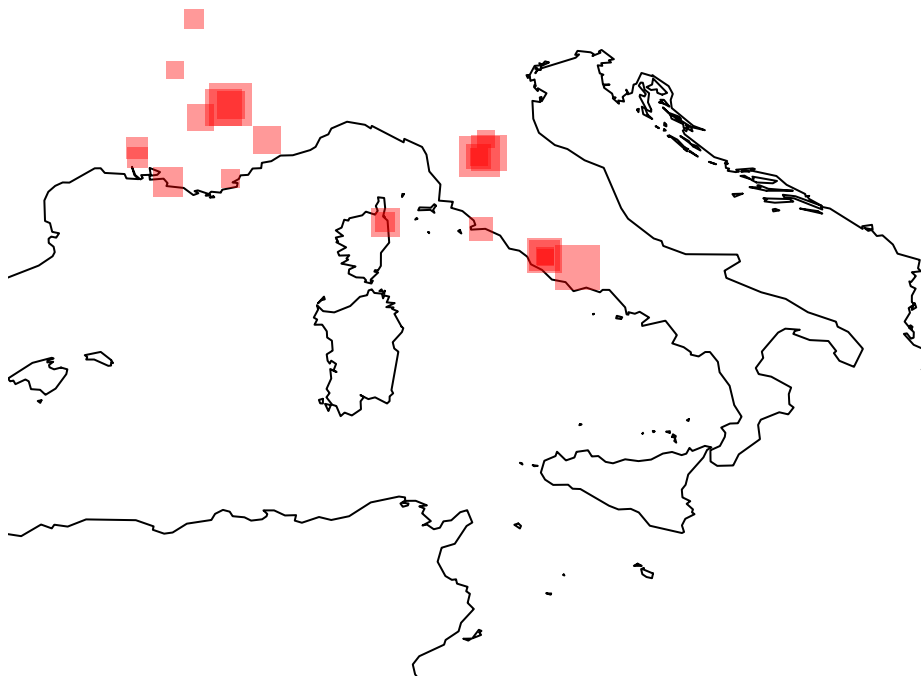

1185 cal. AD

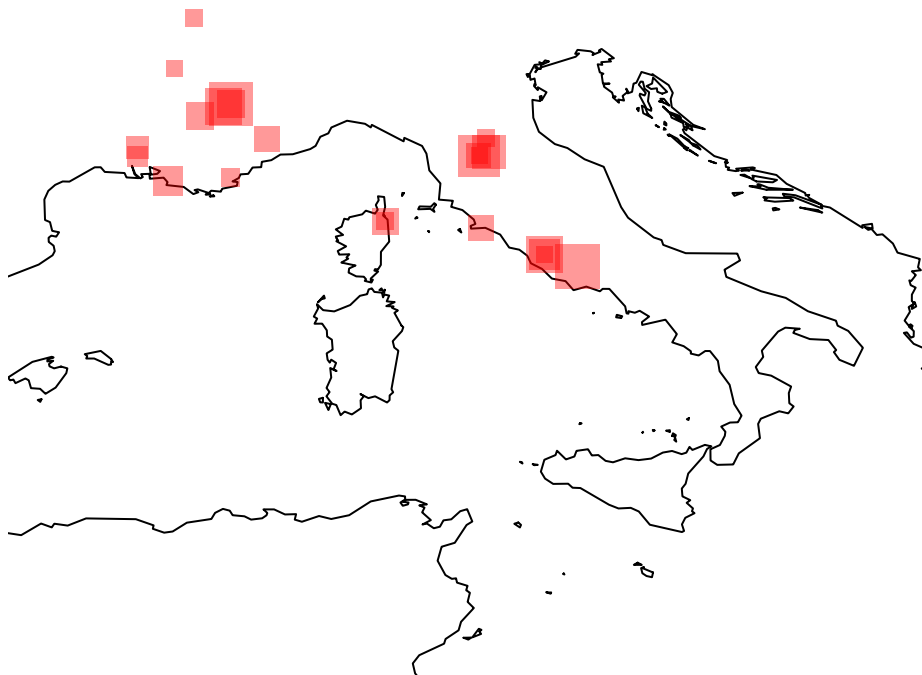

1190 cal. AD

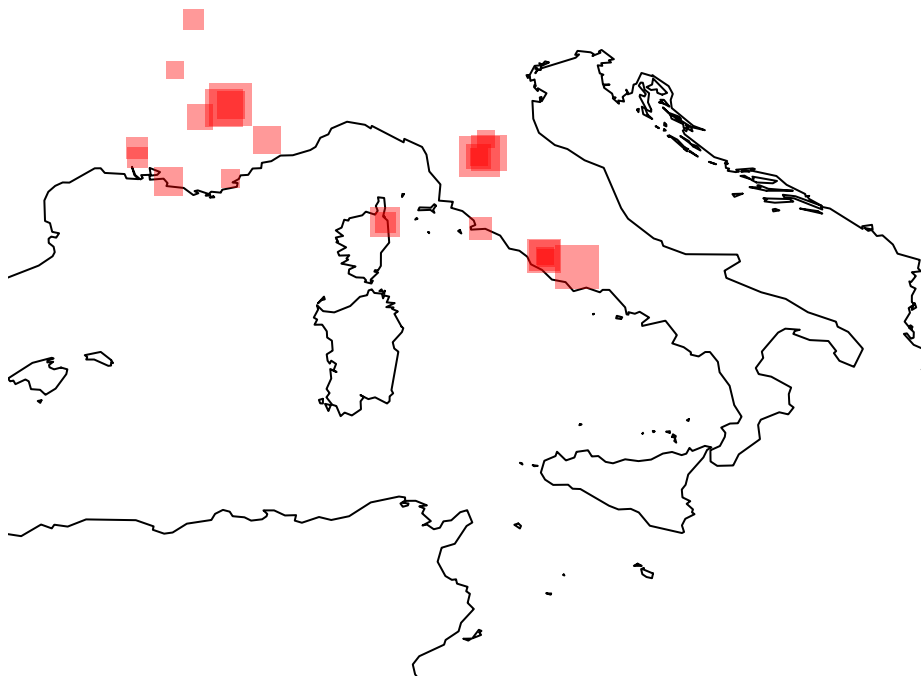



1195 cal. AD



1200 cal. AD

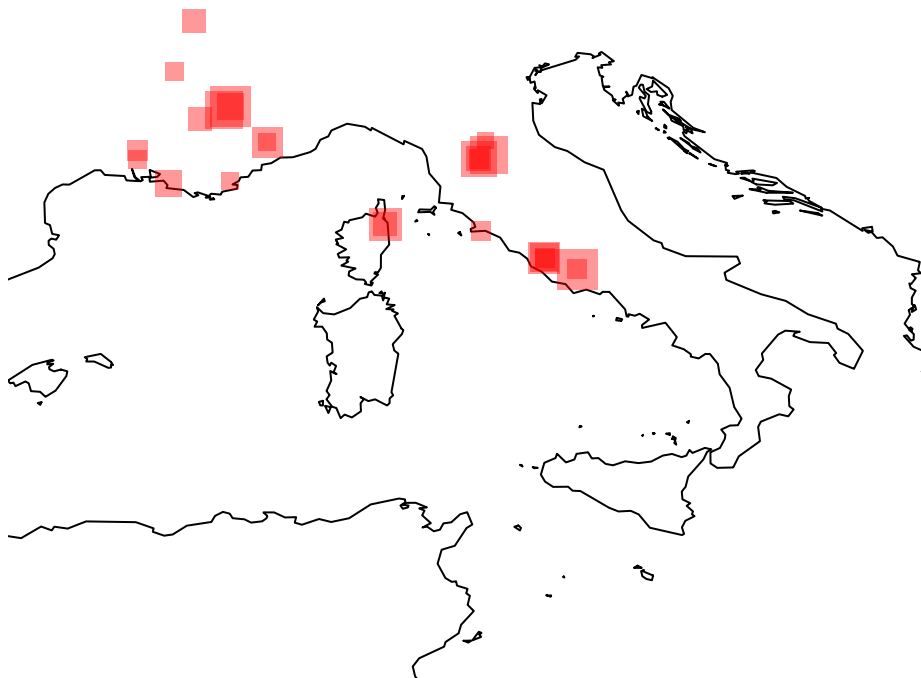



1210 cal. AD

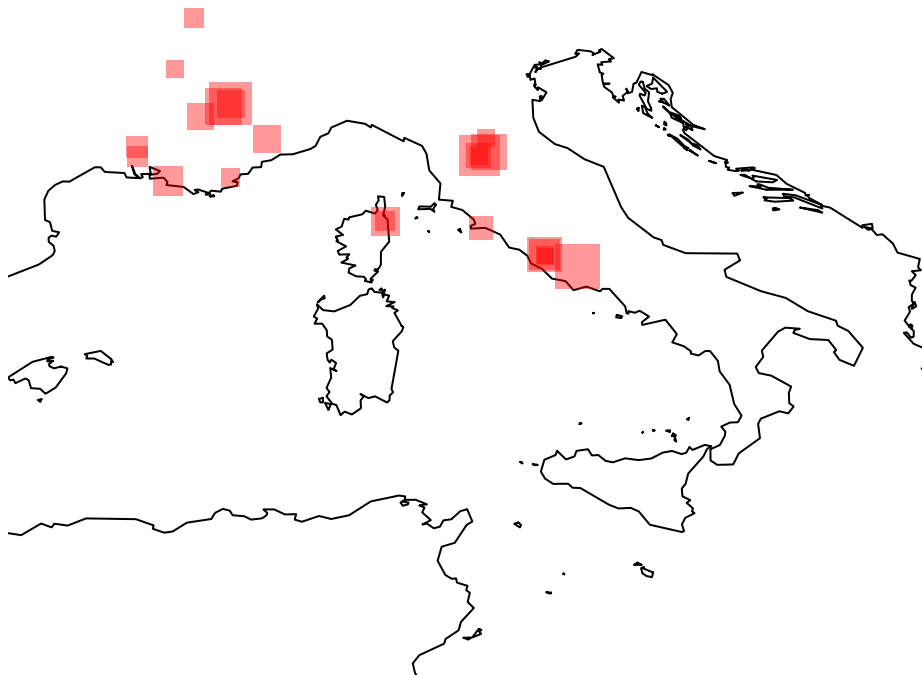

1215 cal. AD

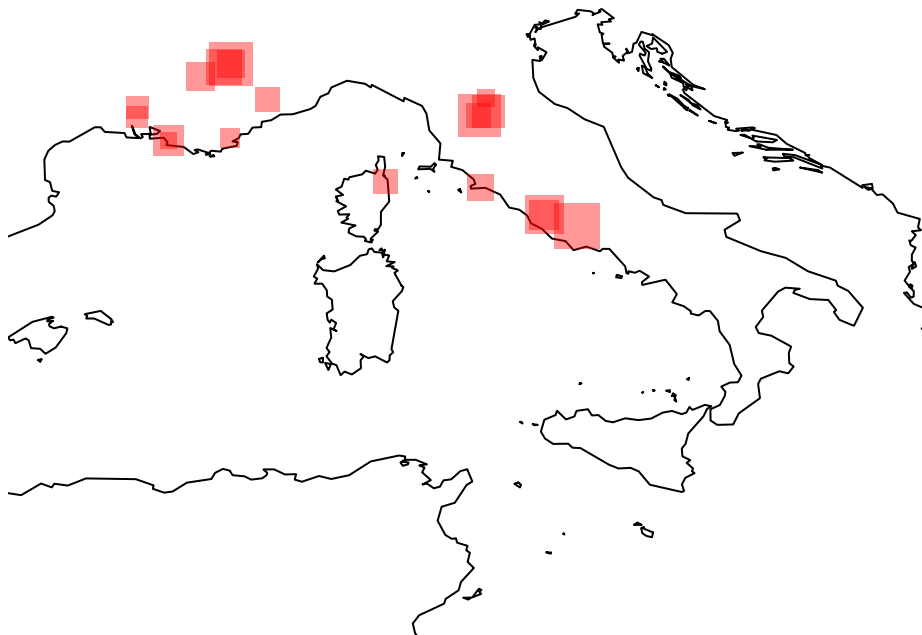



1225 cal. AD

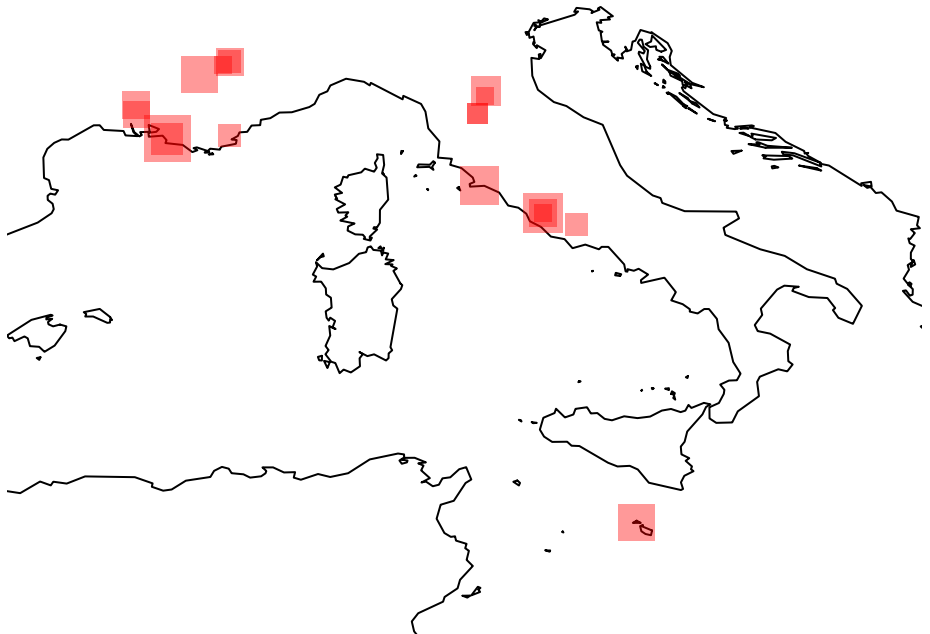

1230 cal. AD

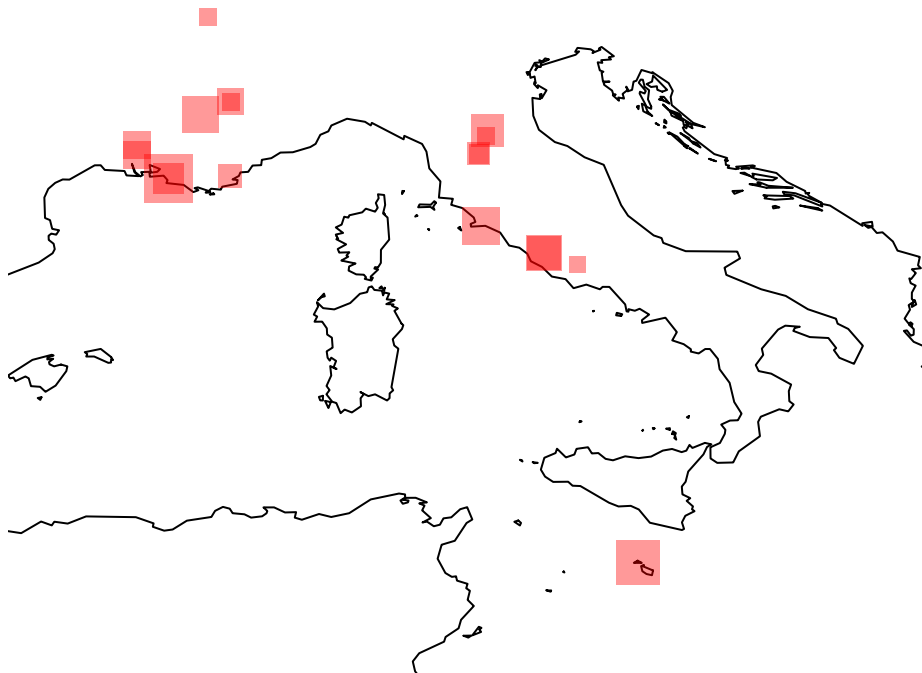





1240 cal. AD

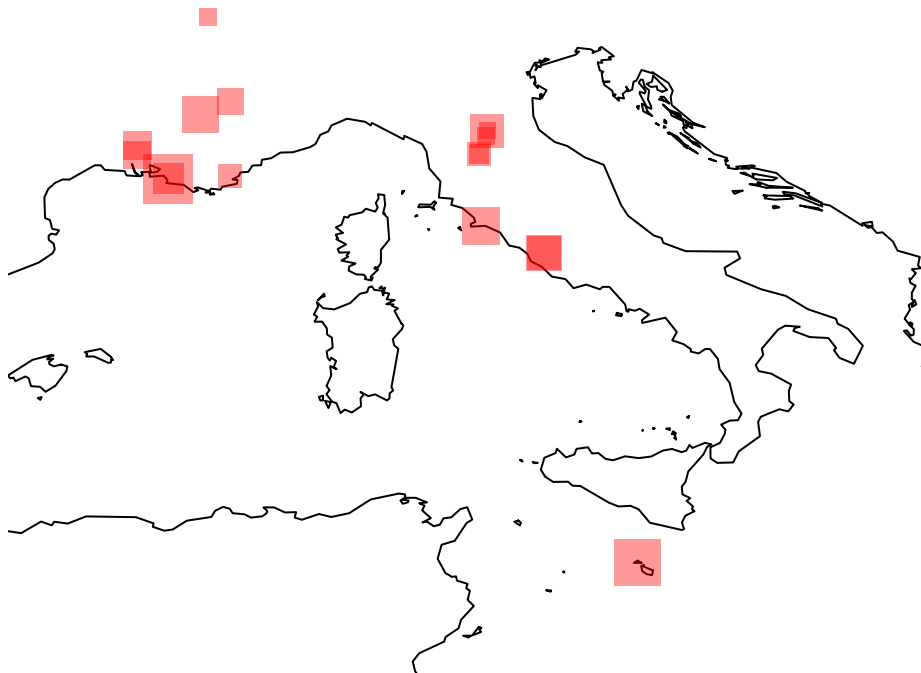

1245 cal. AD

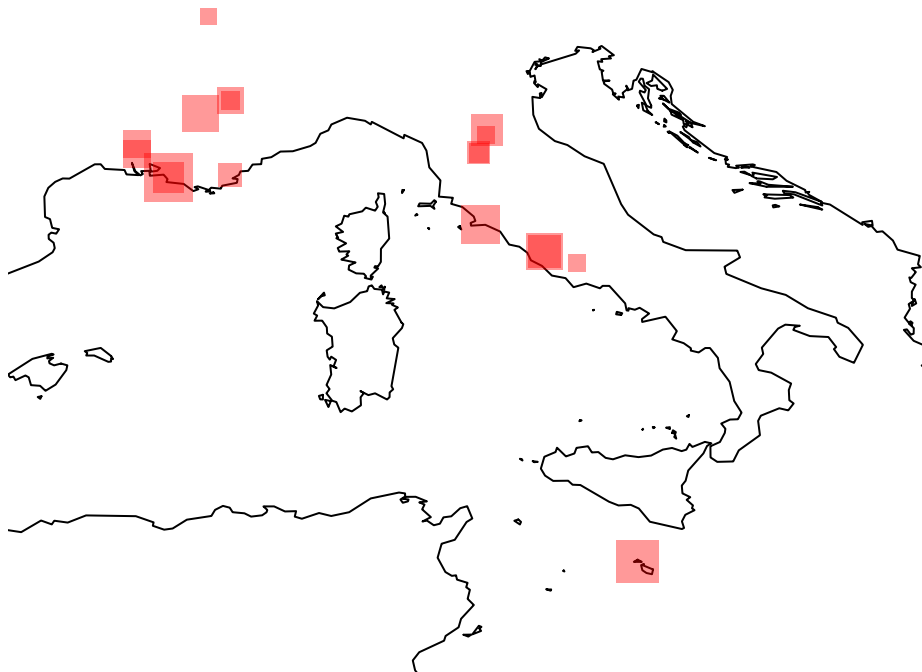

1250 cal. AD

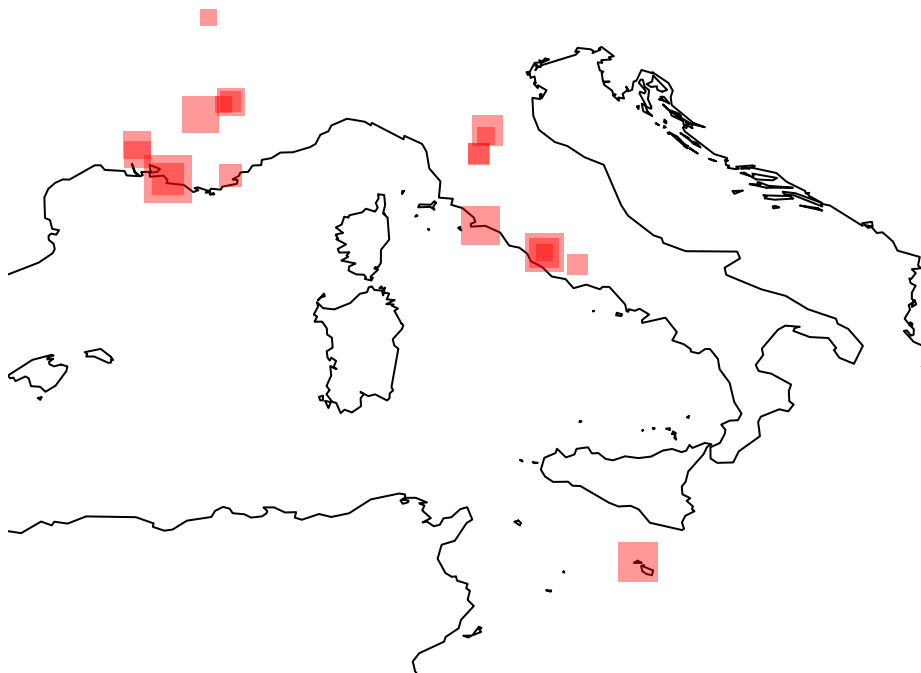

1255 cal. AD

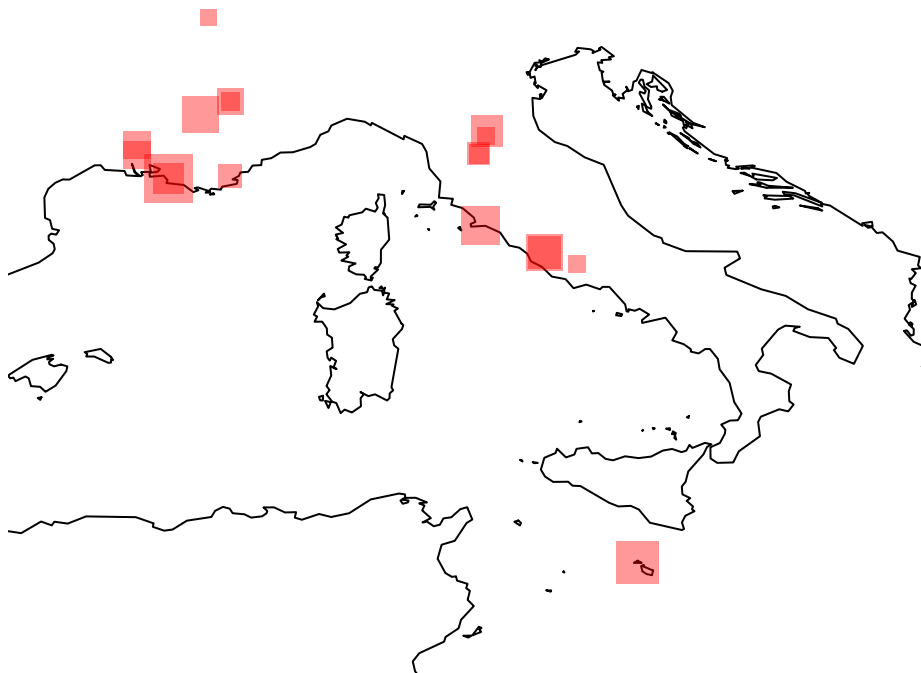

1260 cal. AD

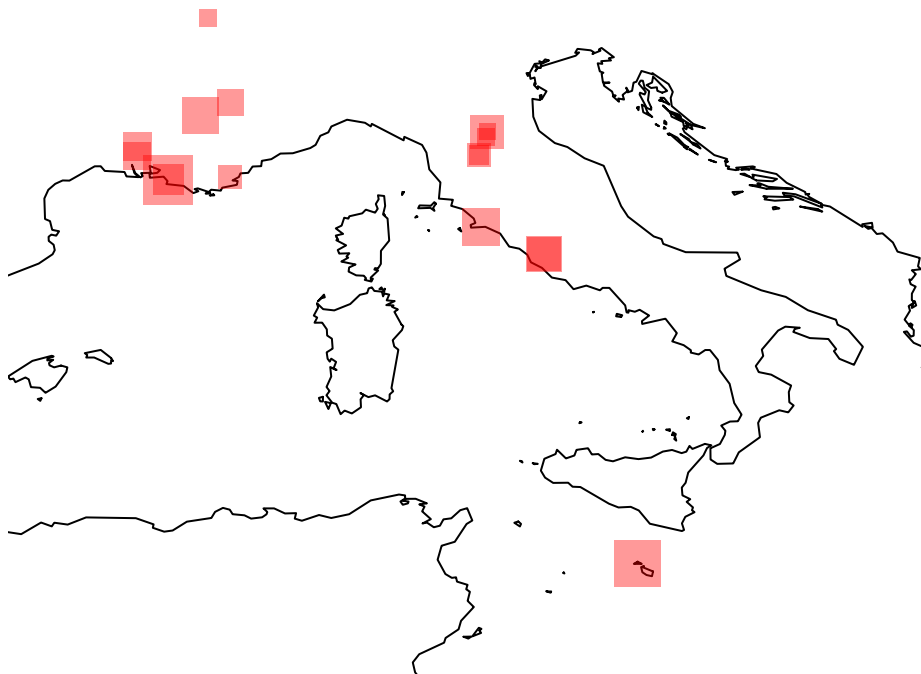



1270 cal. AD

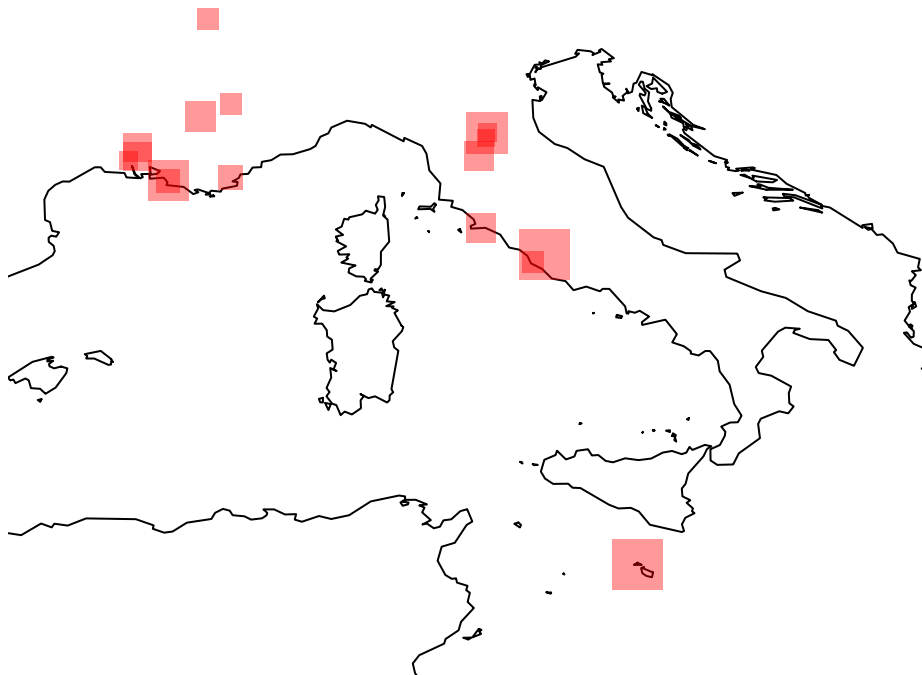



1275 cal. AD

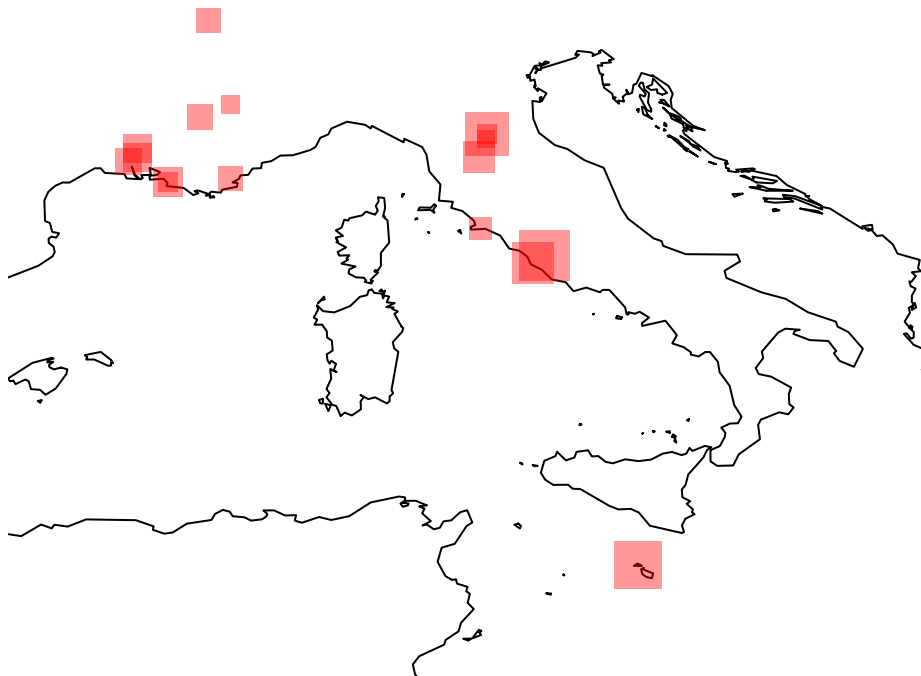

1280 cal. AD

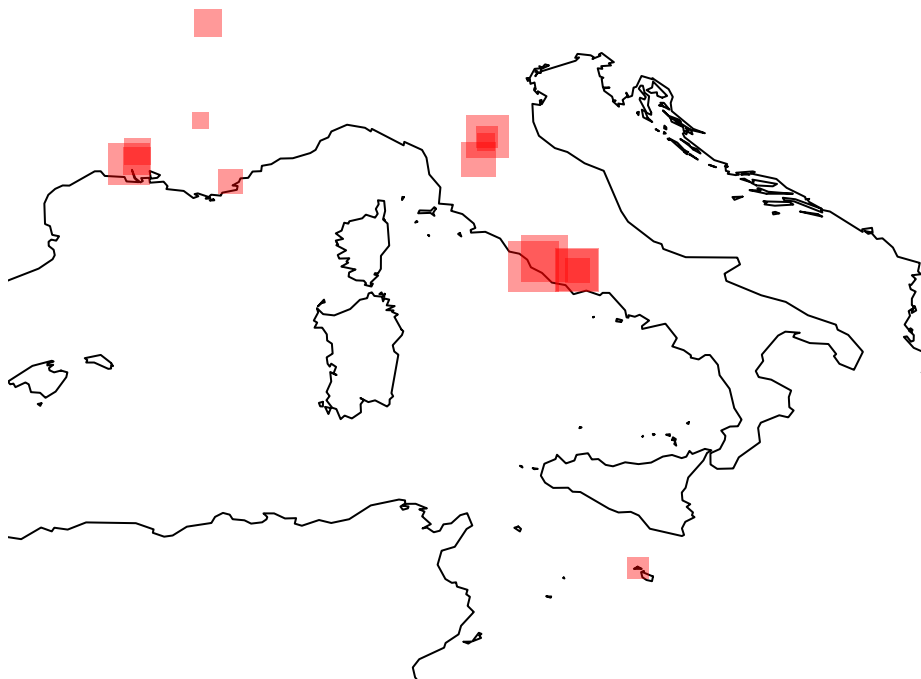

1285 cal. AD

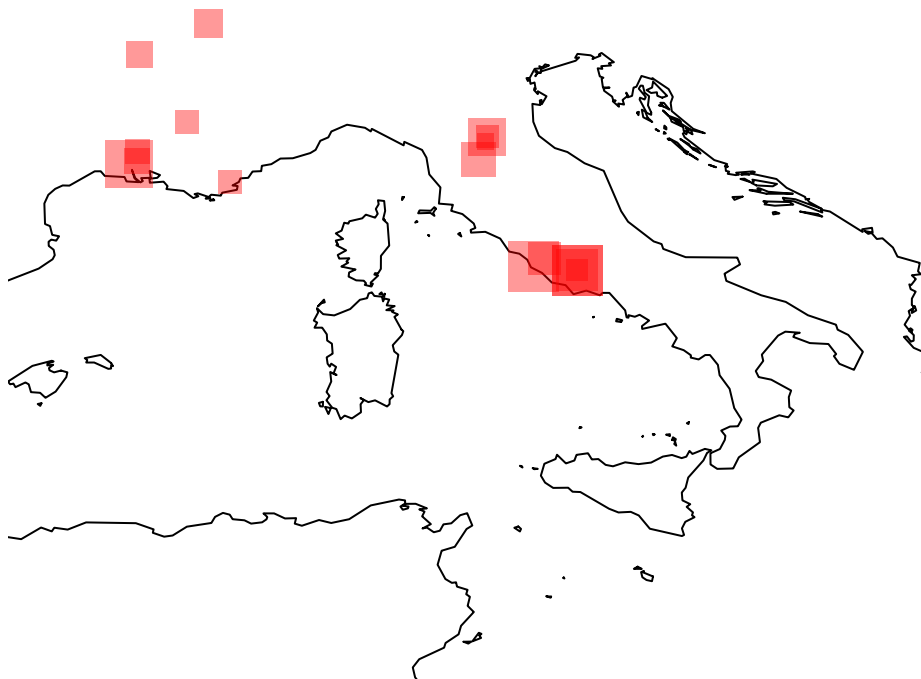



1295 cal. AD

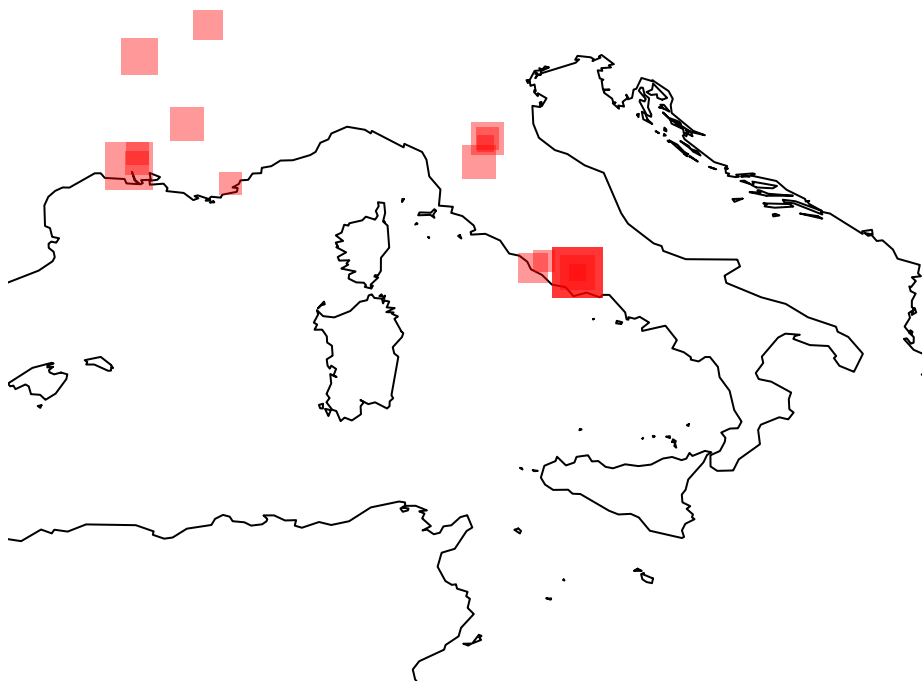

1300 cal. AD

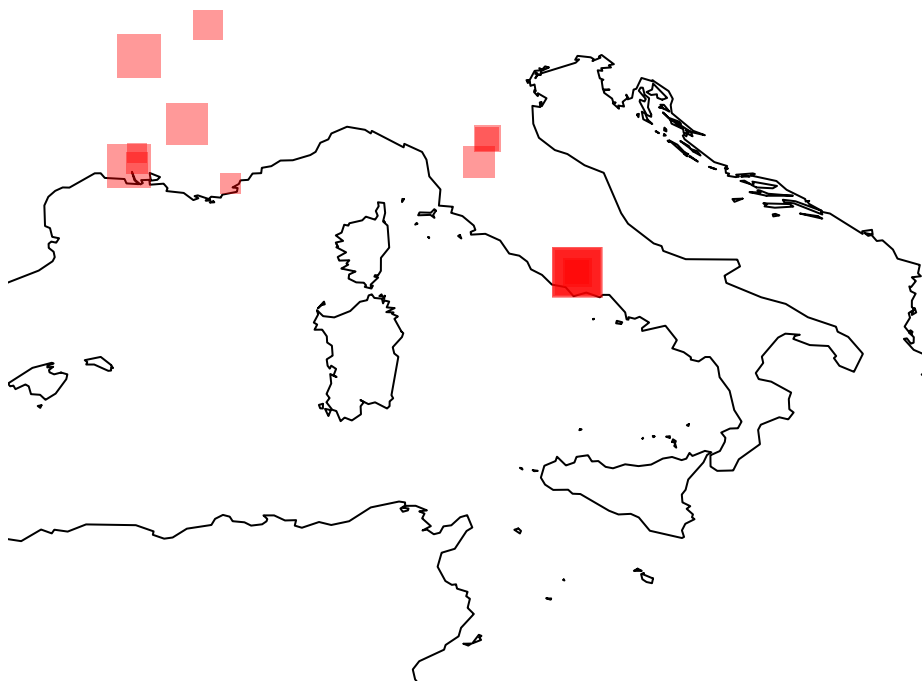

1305 cal. AD

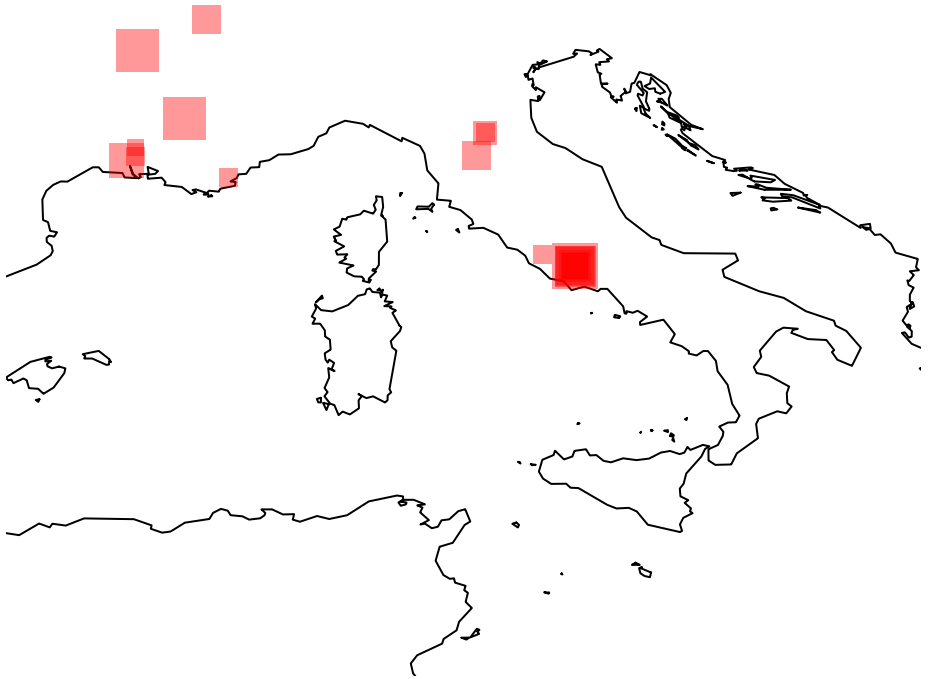

1310 cal. AD

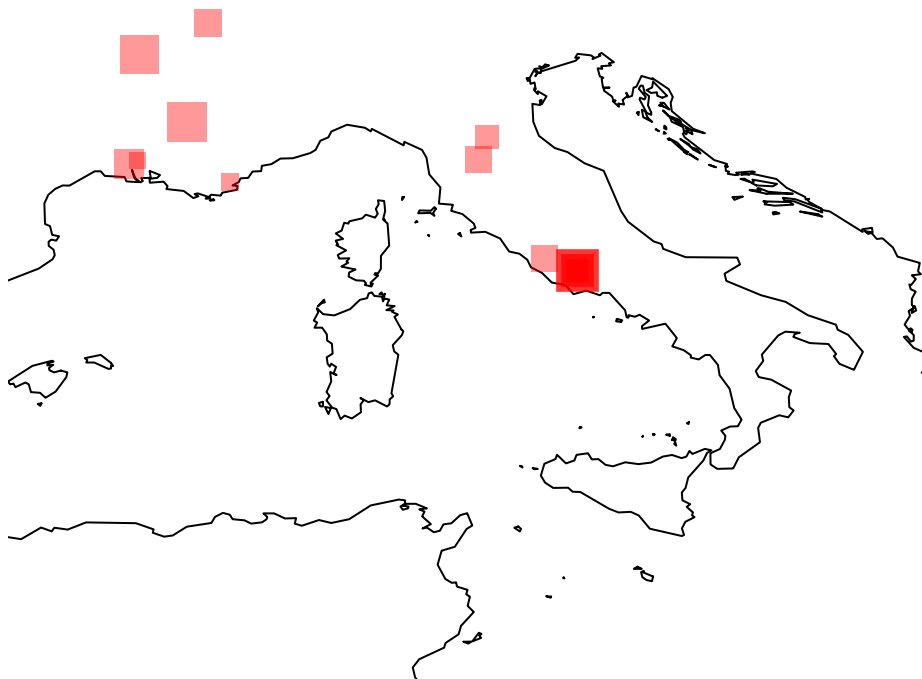



1315 cal. AD

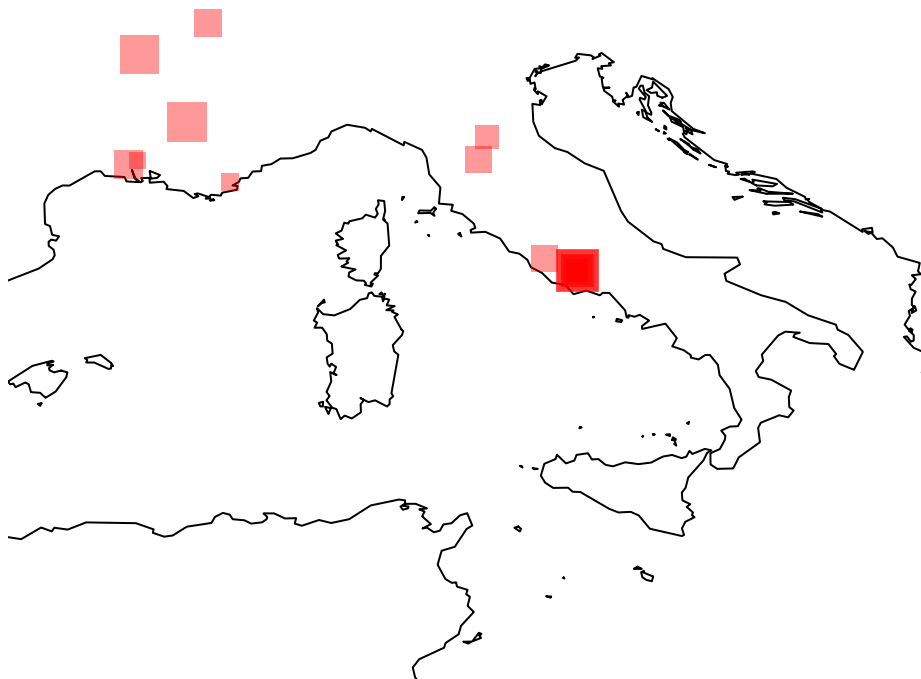

1320 cal. AD

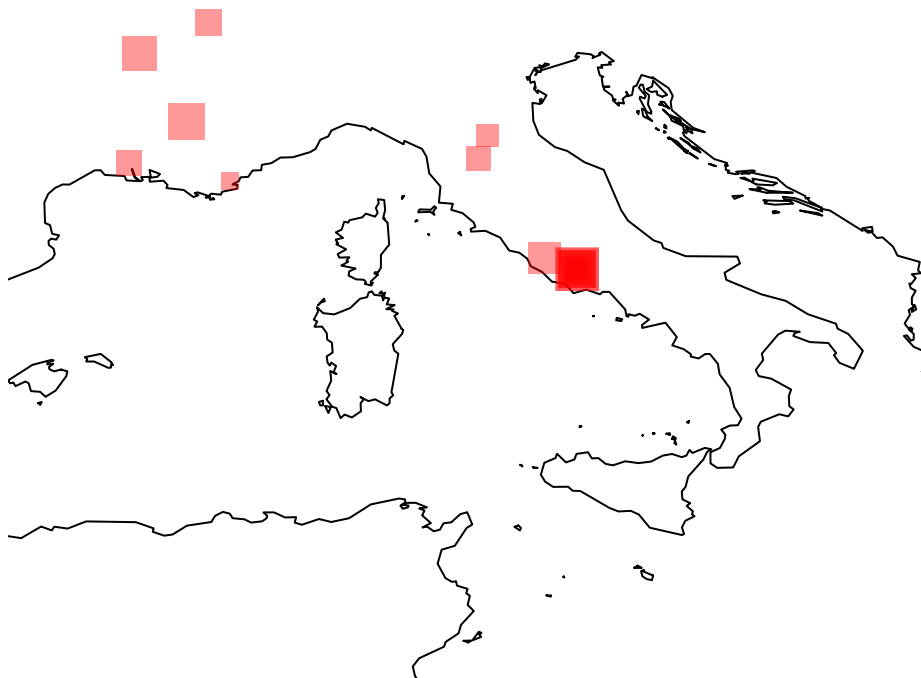



1330 cal. AD

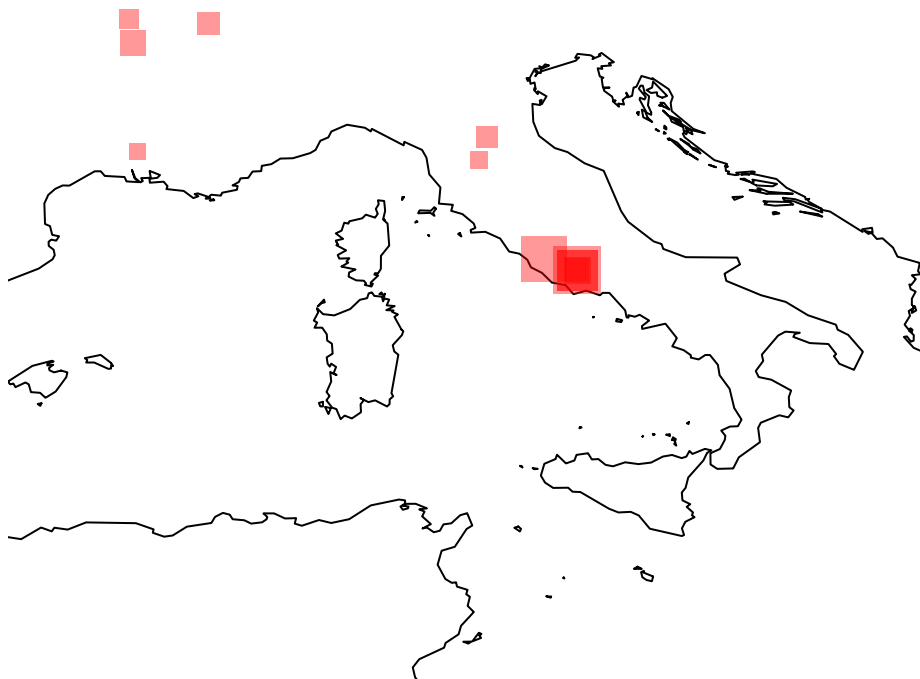

1335 cal. AD

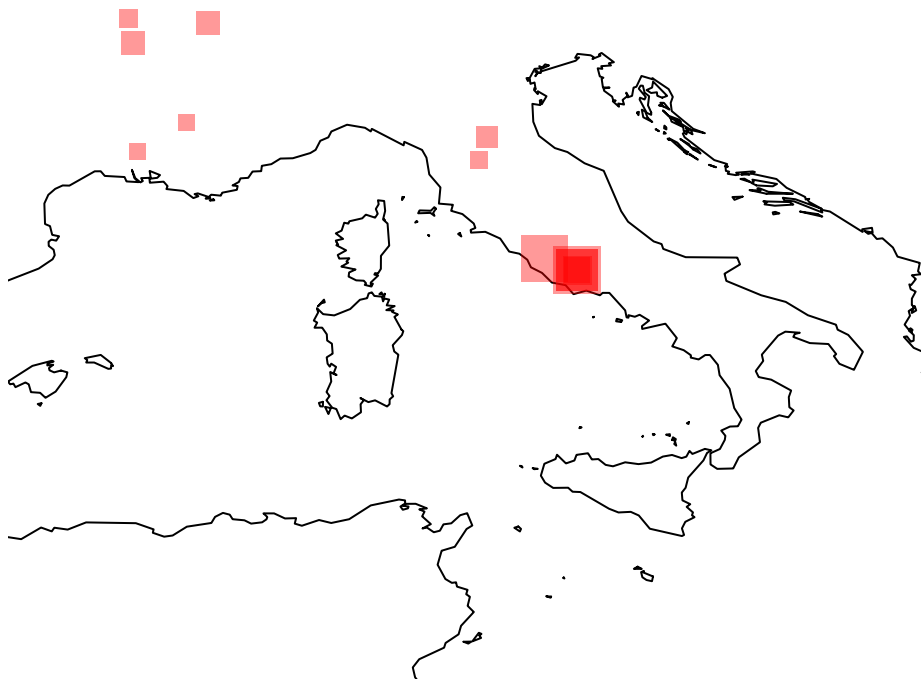

1340 cal. AD

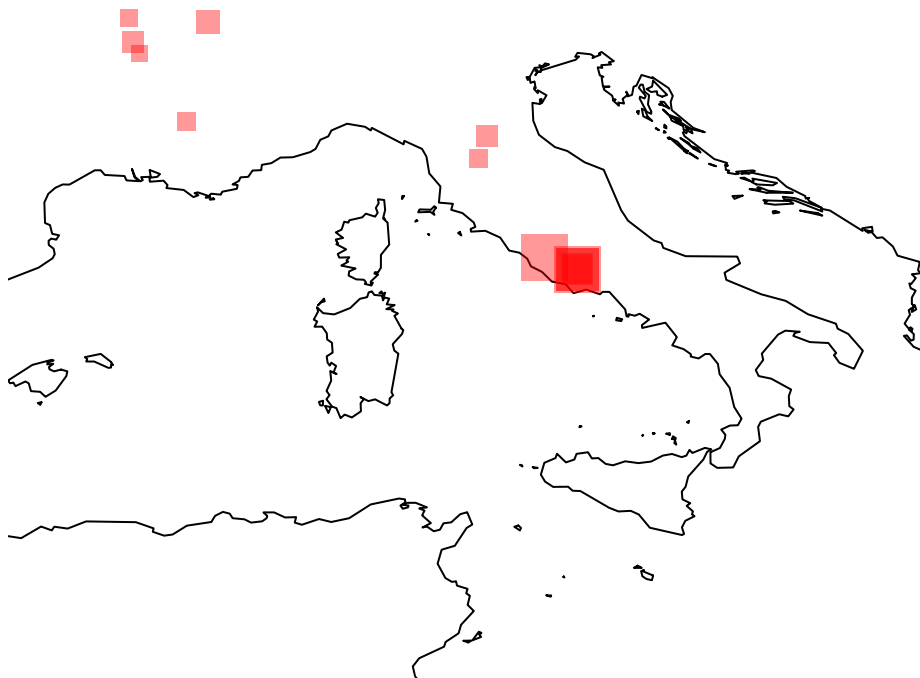







1355 cal. AD

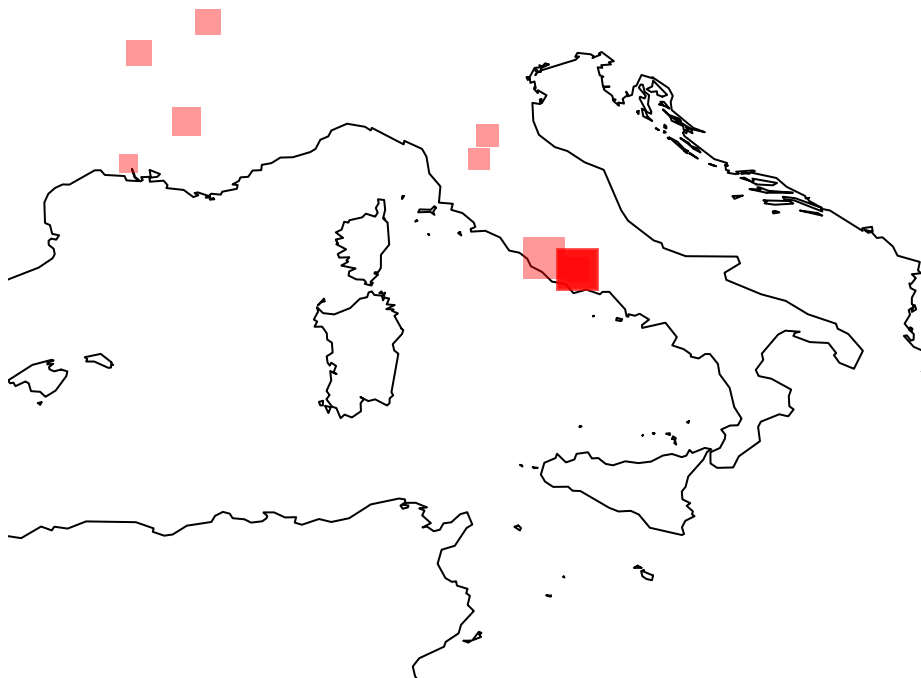

1360 cal. AD

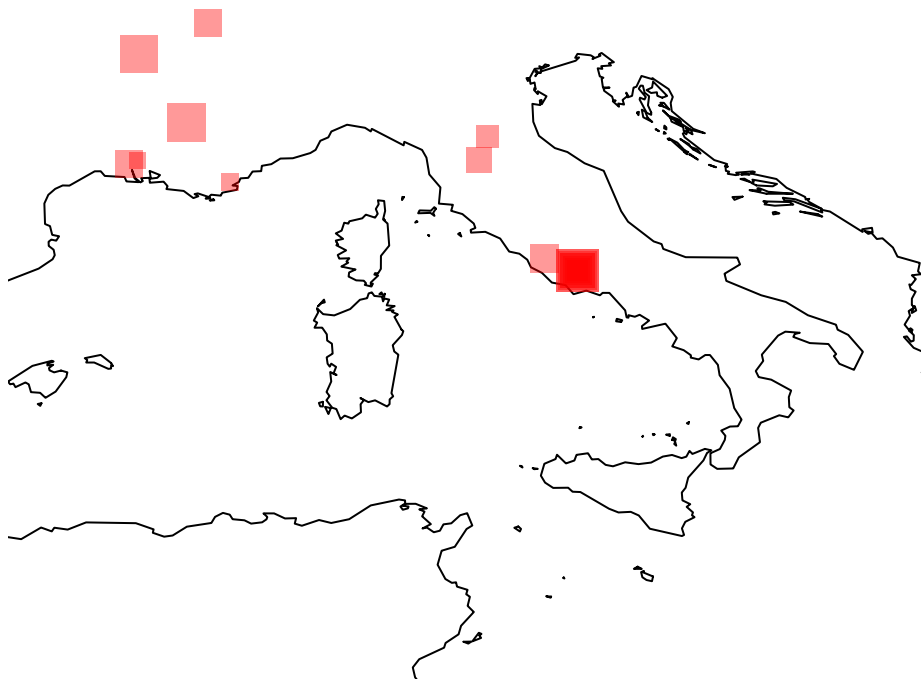

1365 cal. AD

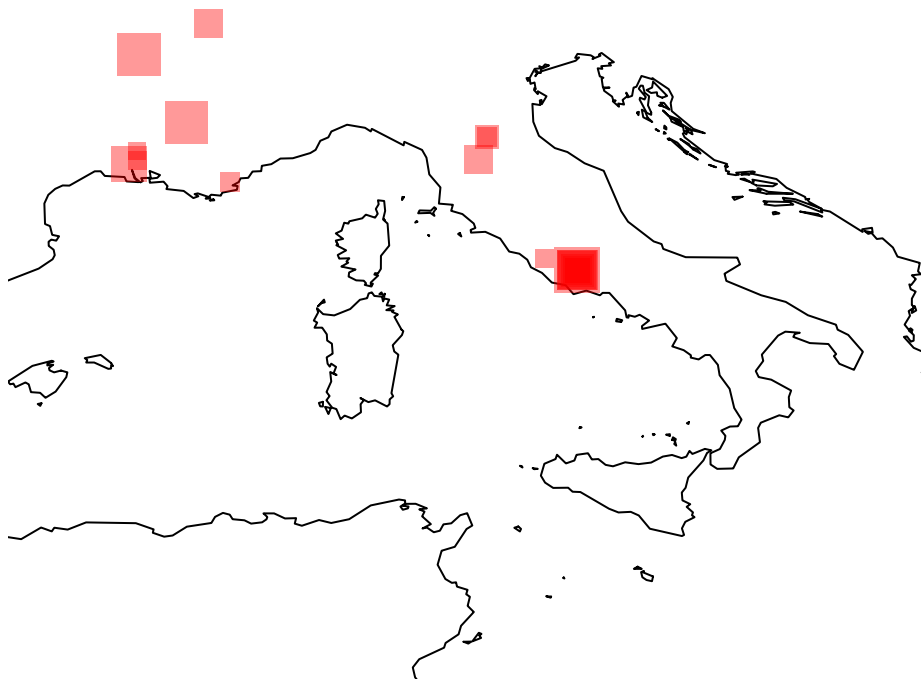

1370 cal. AD

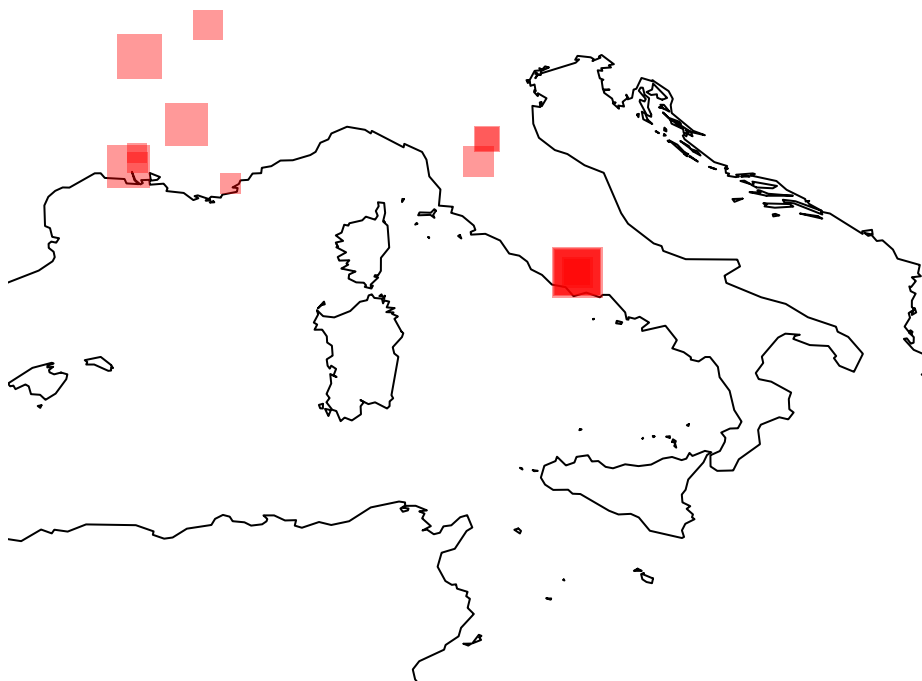

1375 cal. AD

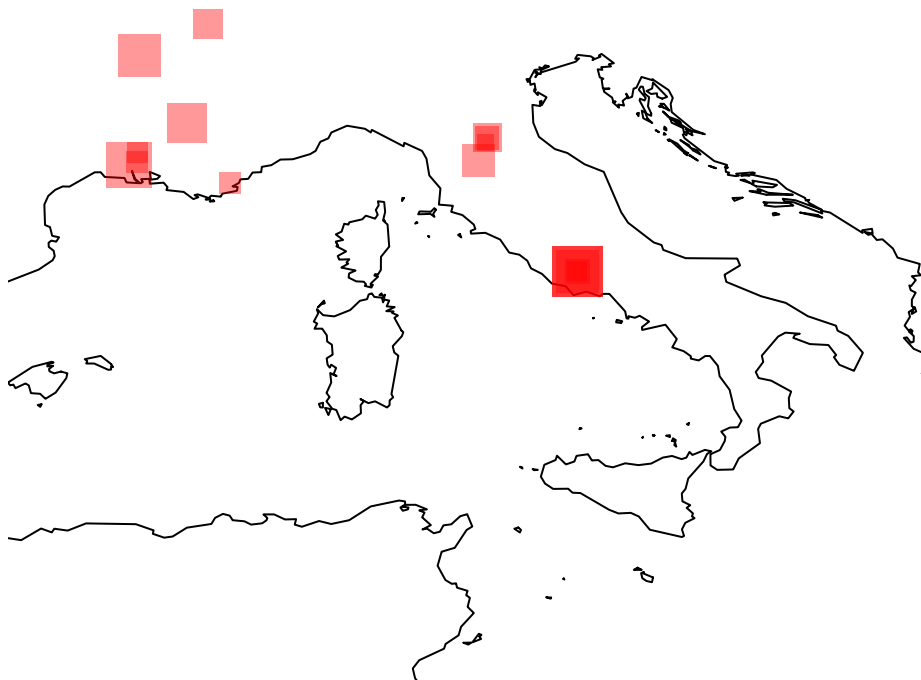

1380 cal. AD

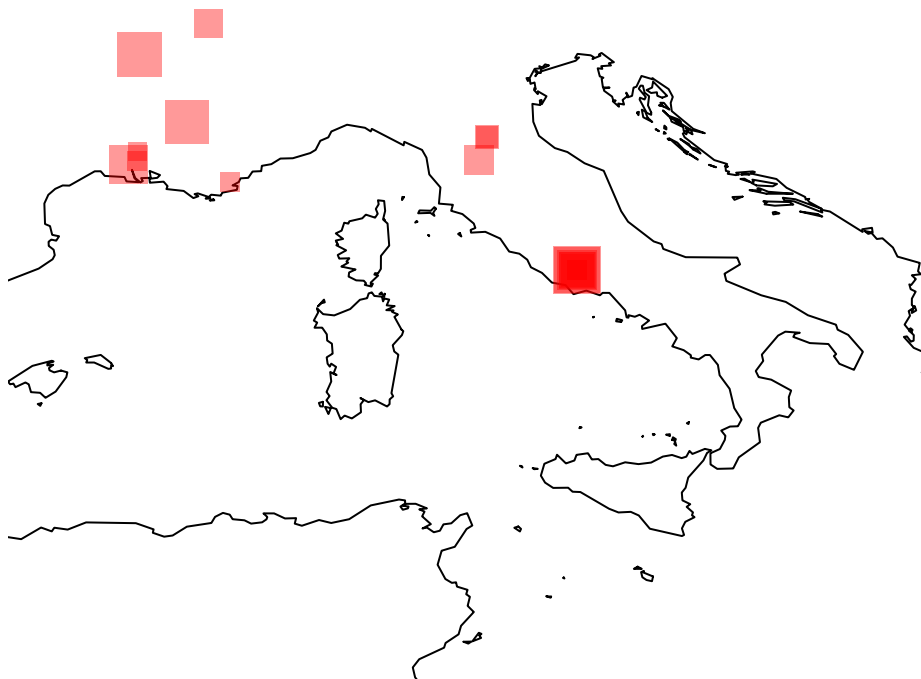

1385 cal. AD

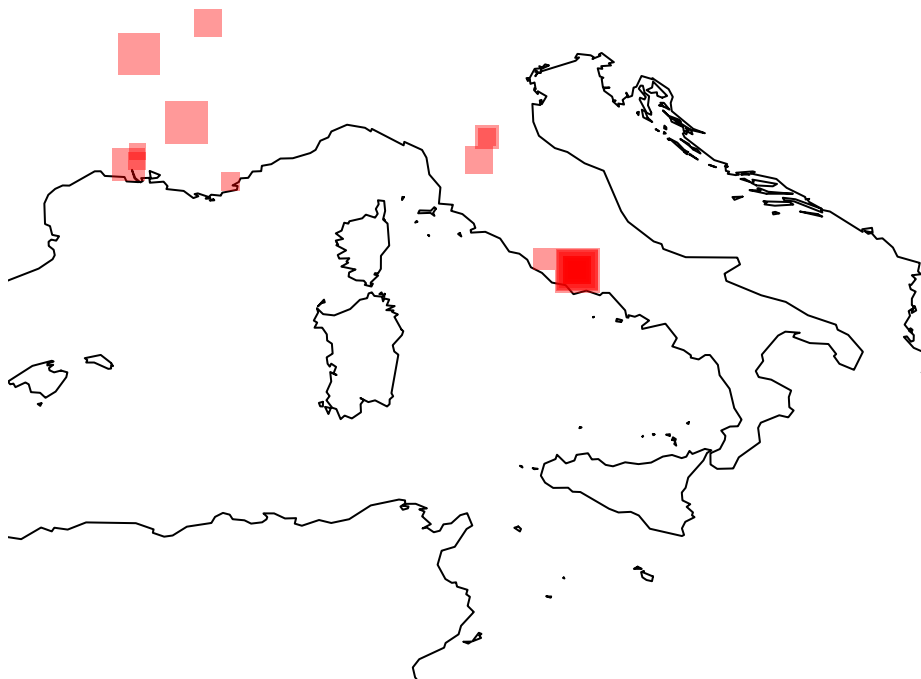

1390 cal. AD

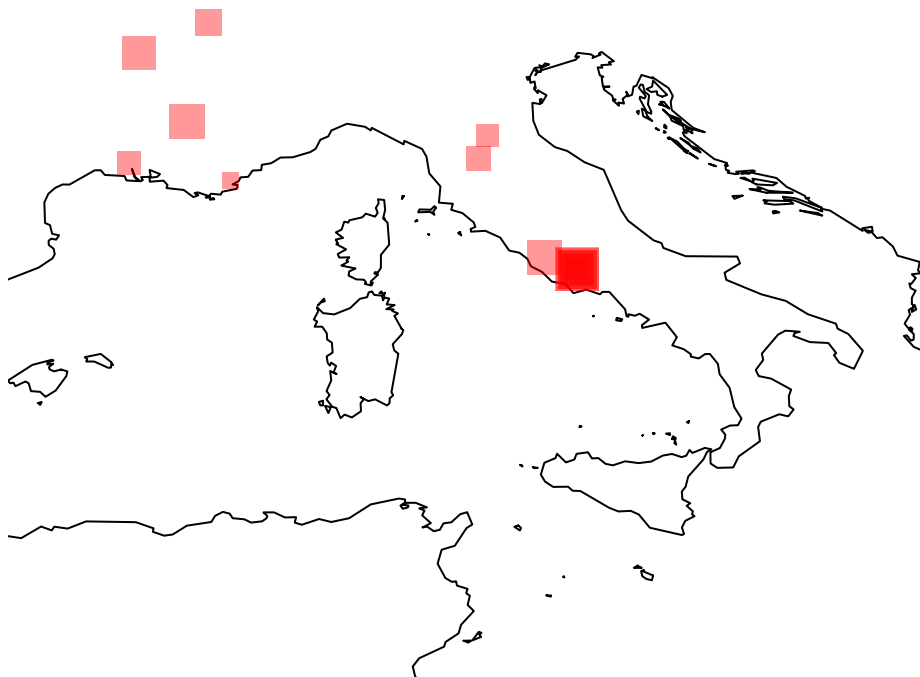



1395 cal. AD

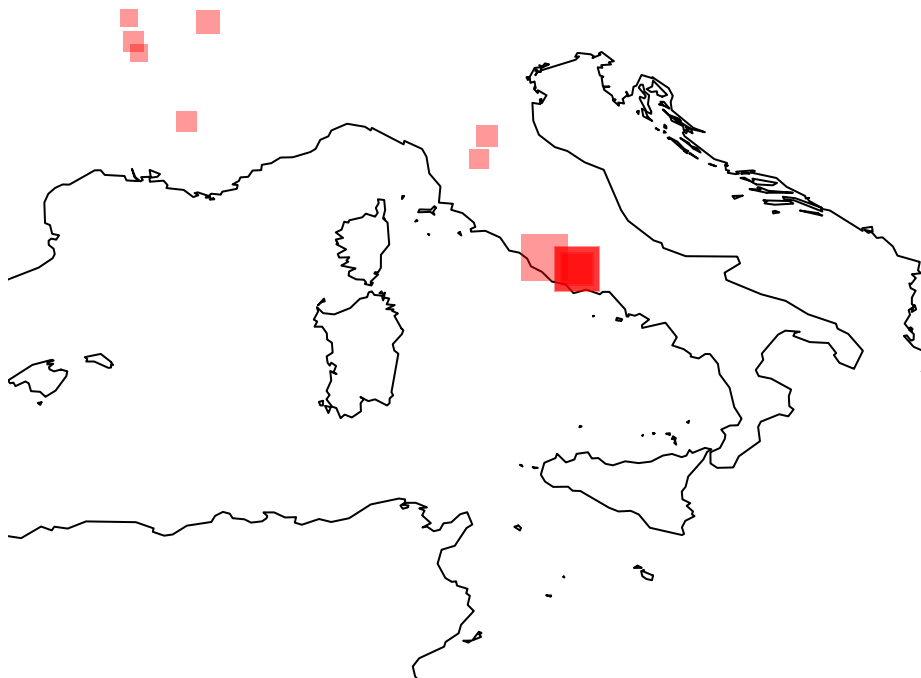

1400 cal. AD

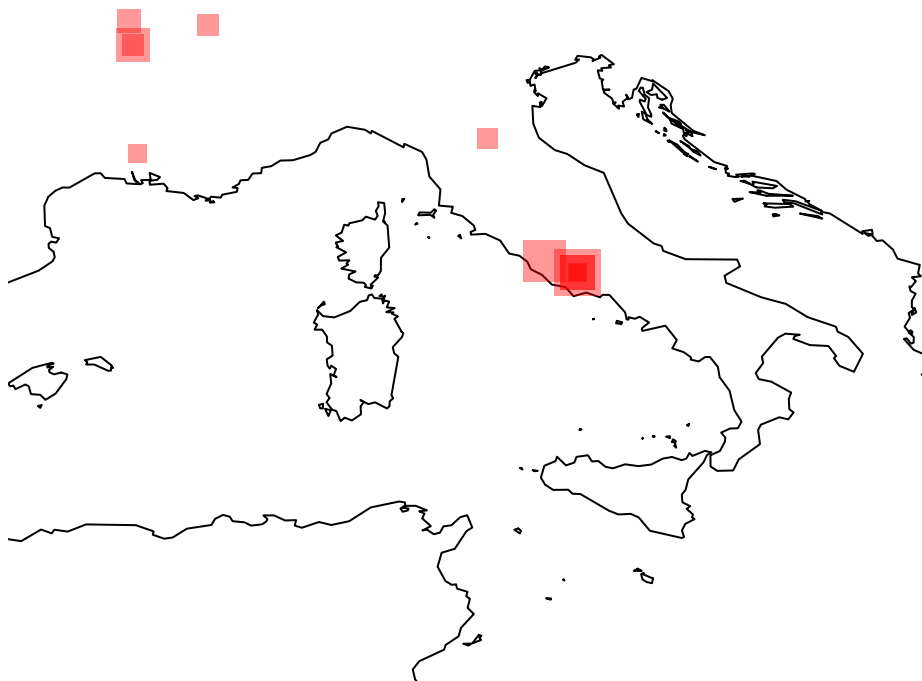

1405 cal. AD

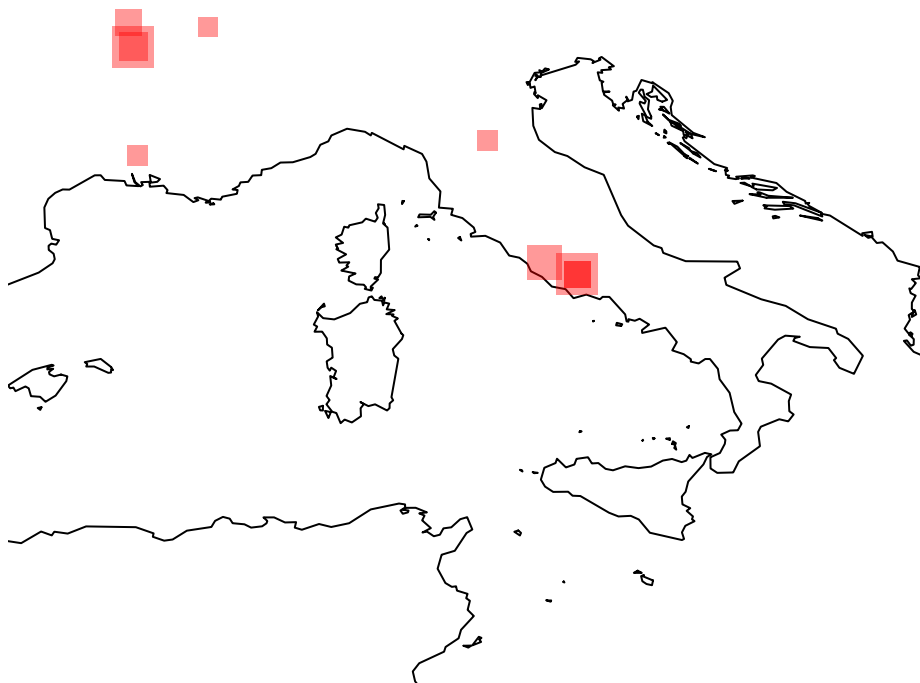

1410 cal. AD

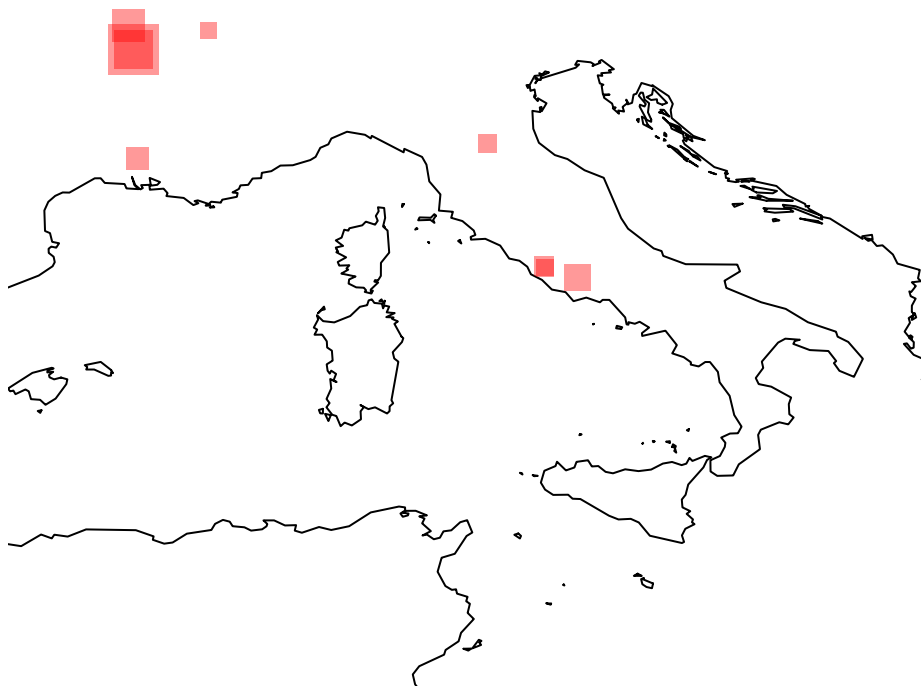

1415 cal. AD

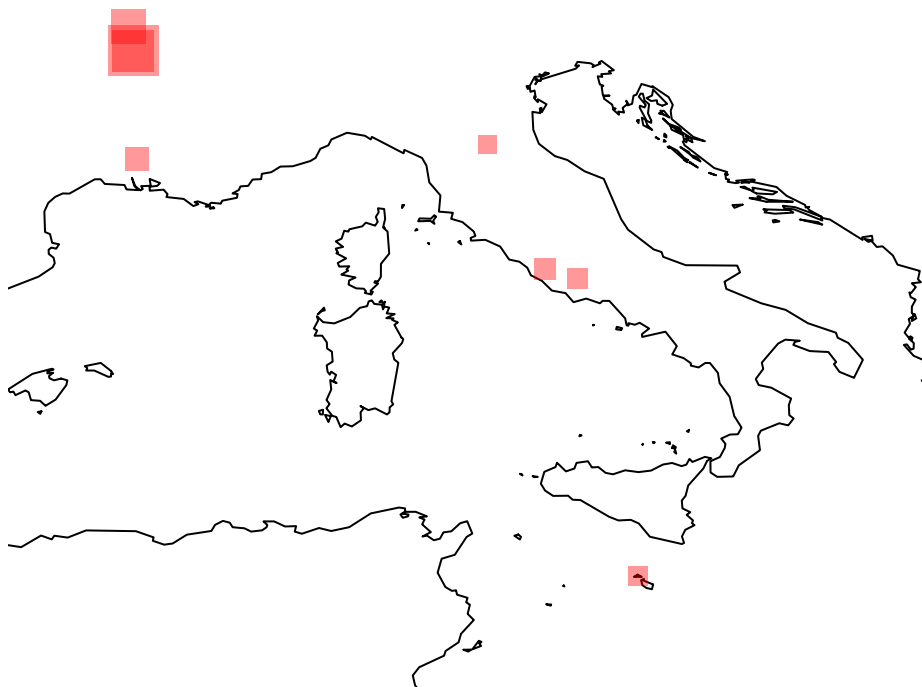

1420 cal. AD

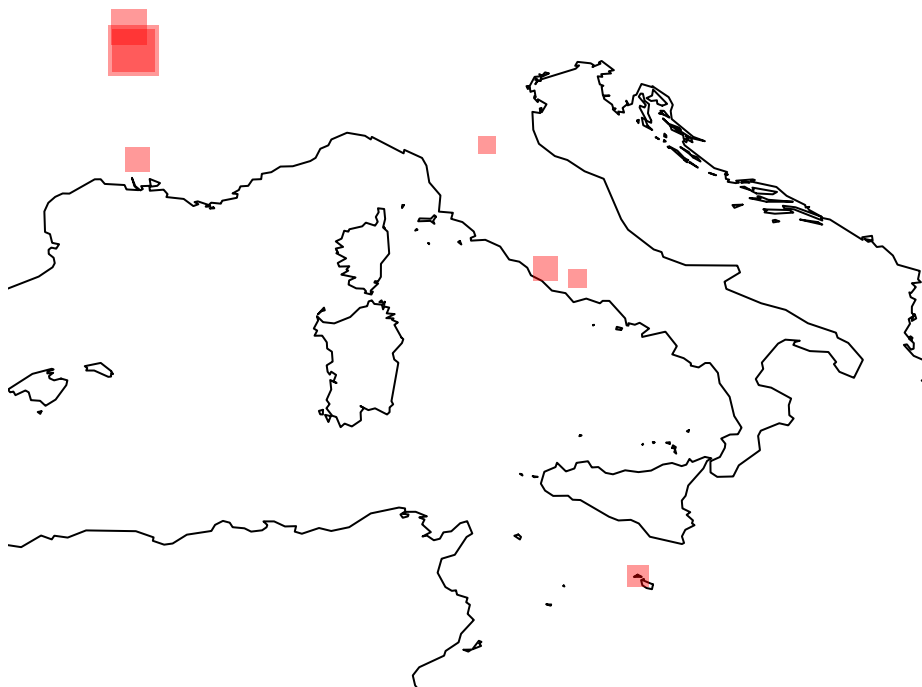

1425 cal. AD

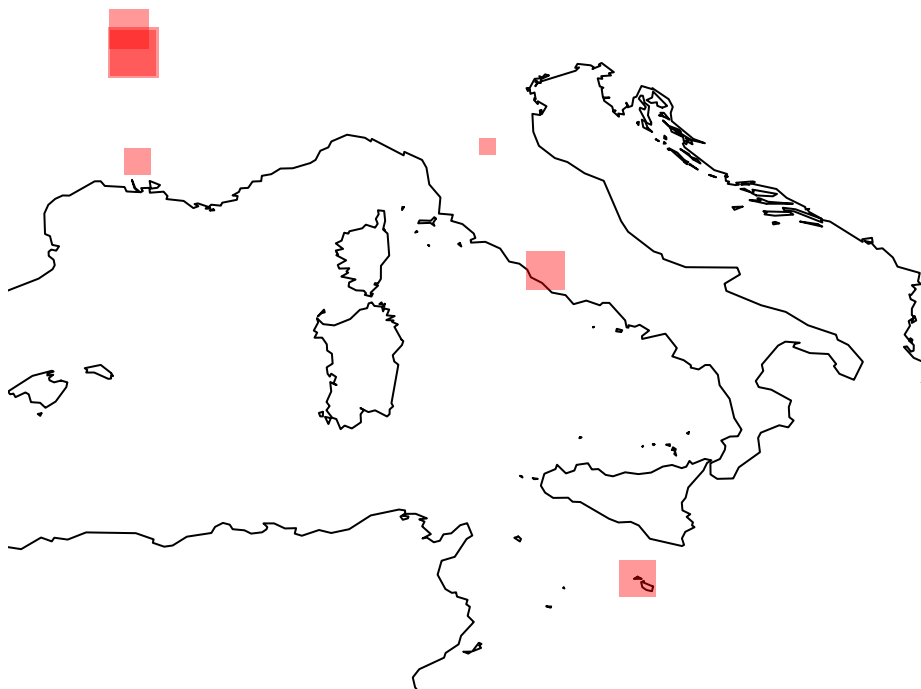

1430 cal. AD

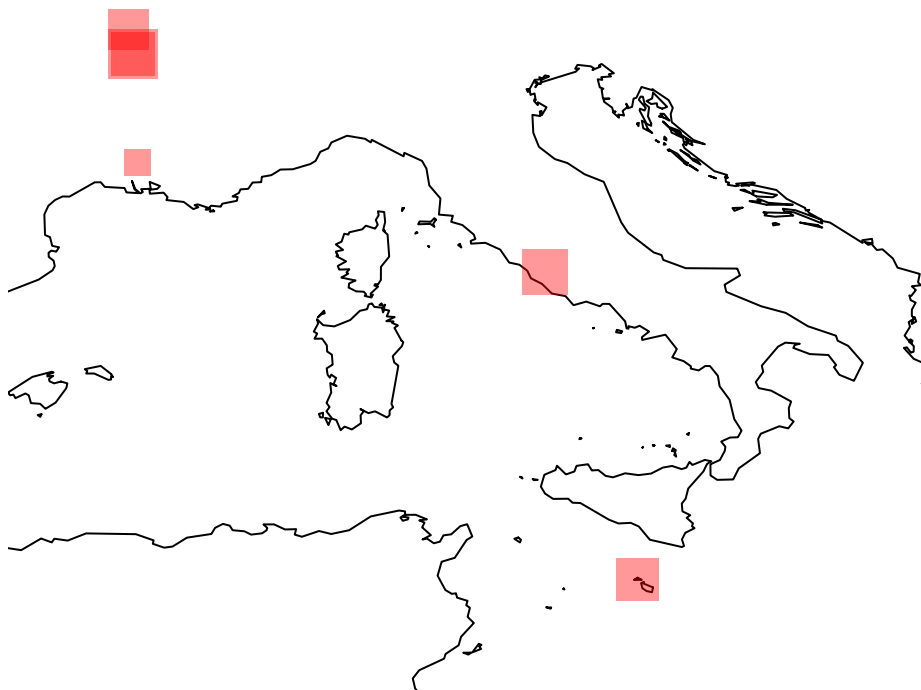



1435 cal. AD

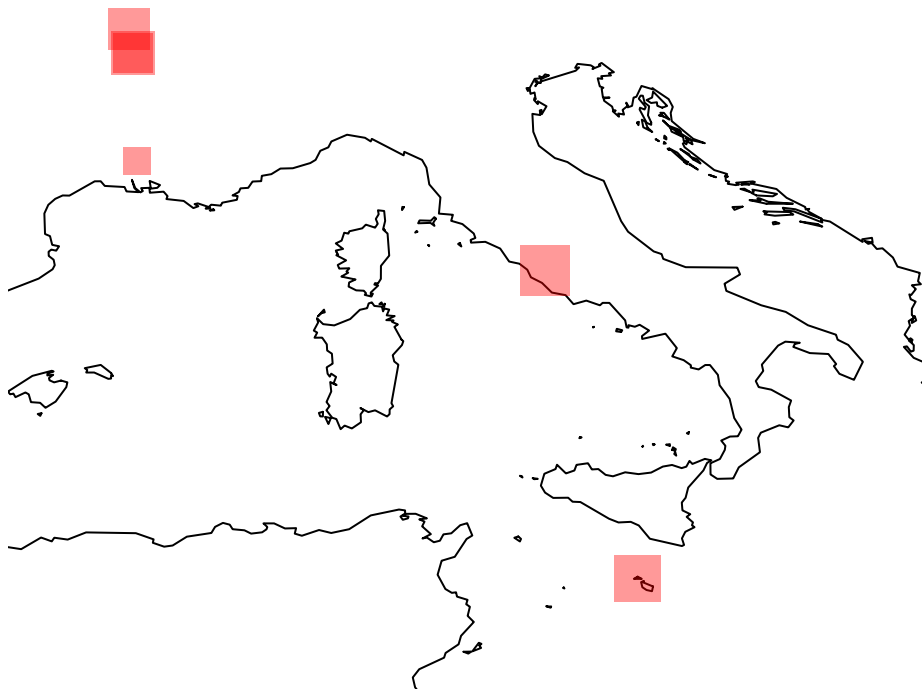

1440 cal. AD

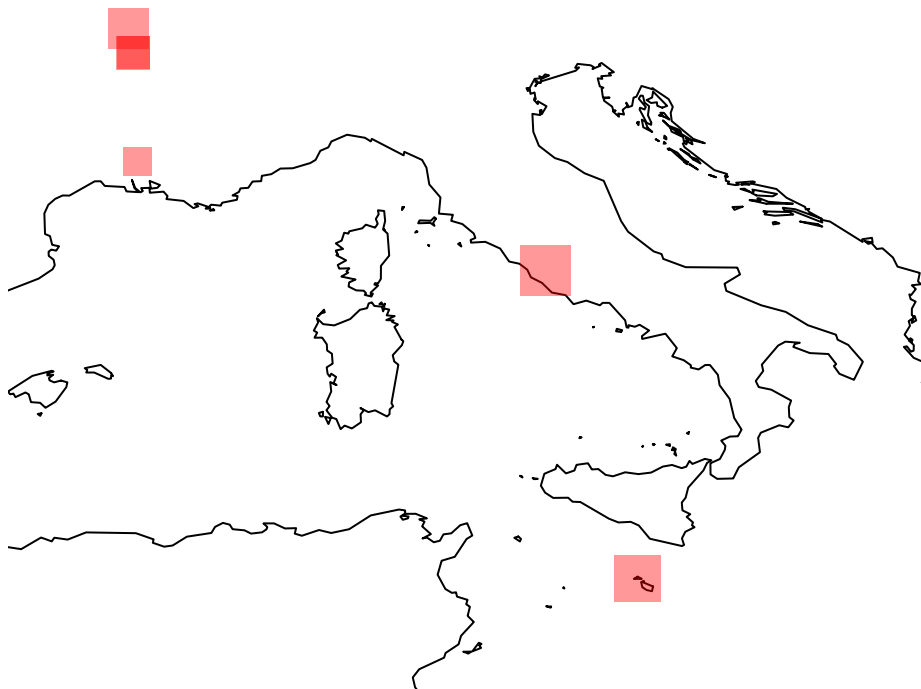

1445 cal. AD

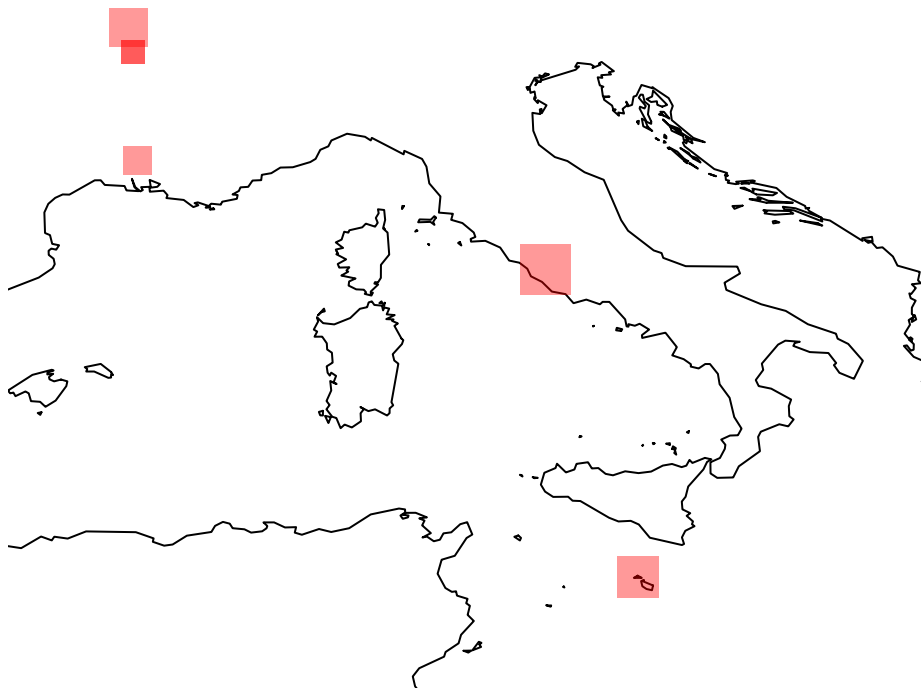

1450 cal. AD

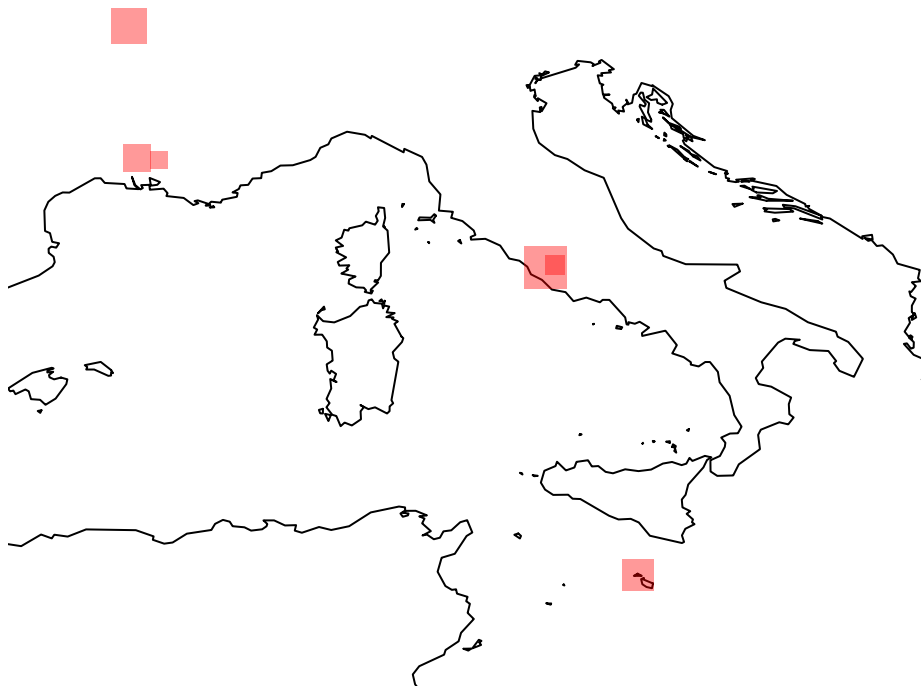

1455 cal. AD

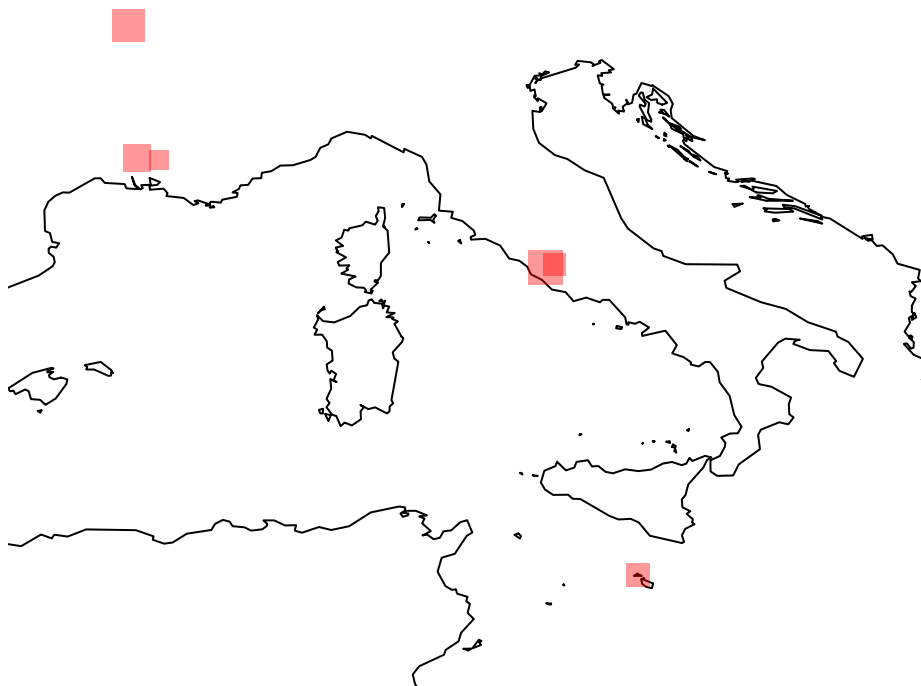

1460 cal. AD

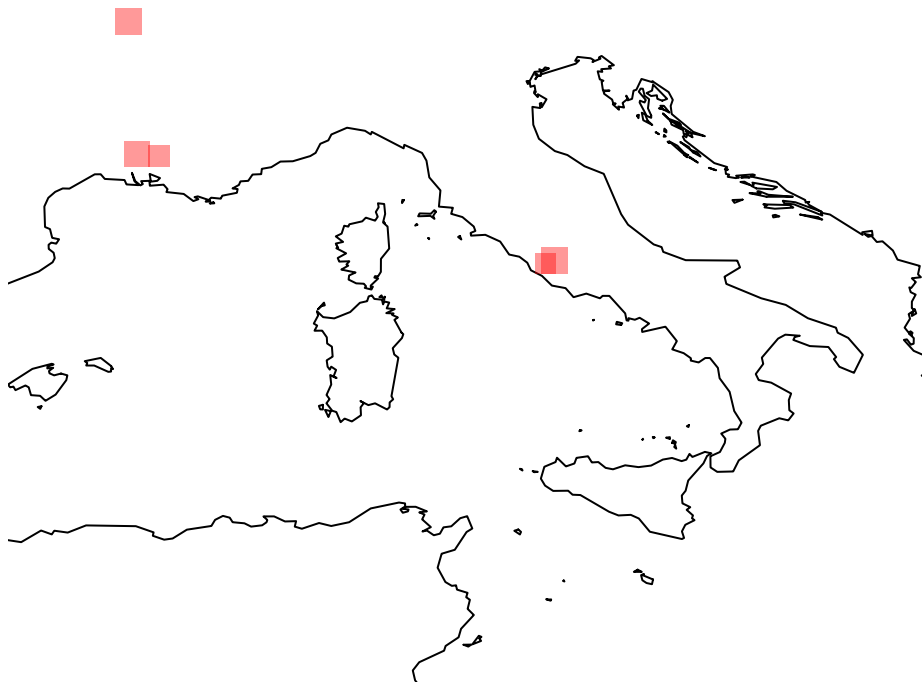

1465 cal. AD

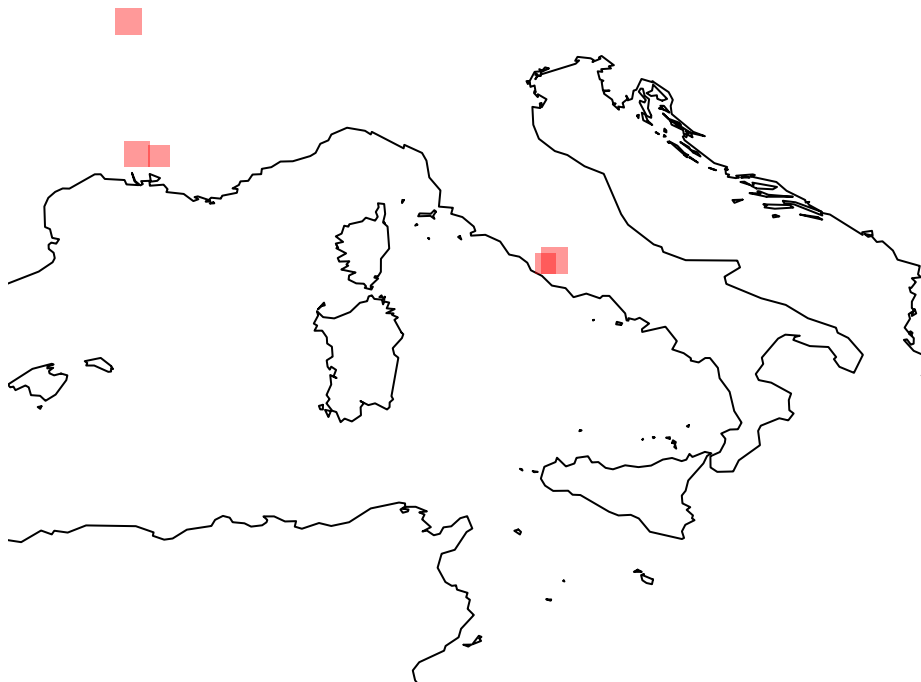

1470 cal. AD

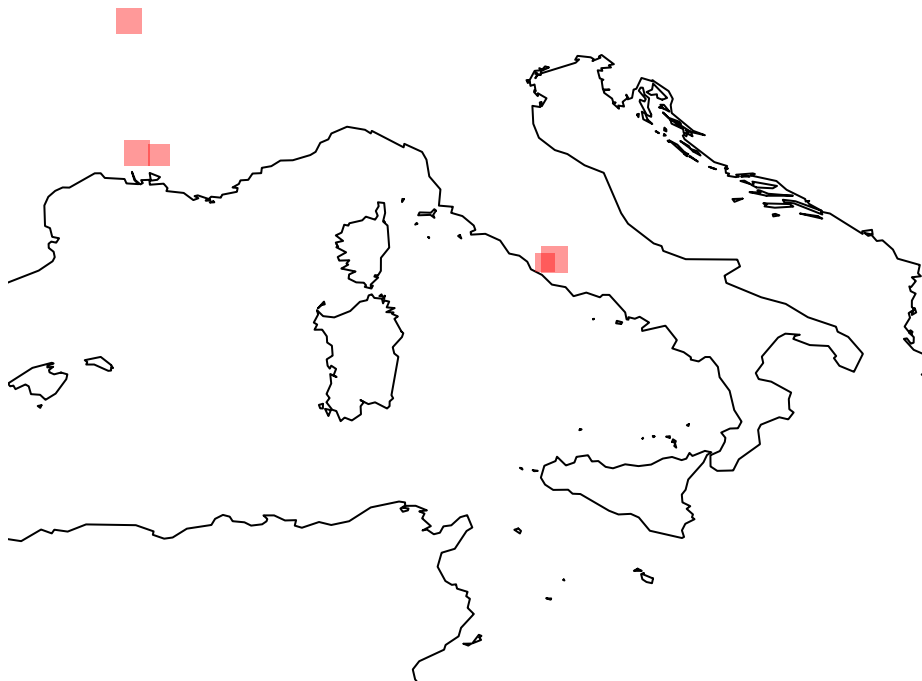



1475 cal. AD

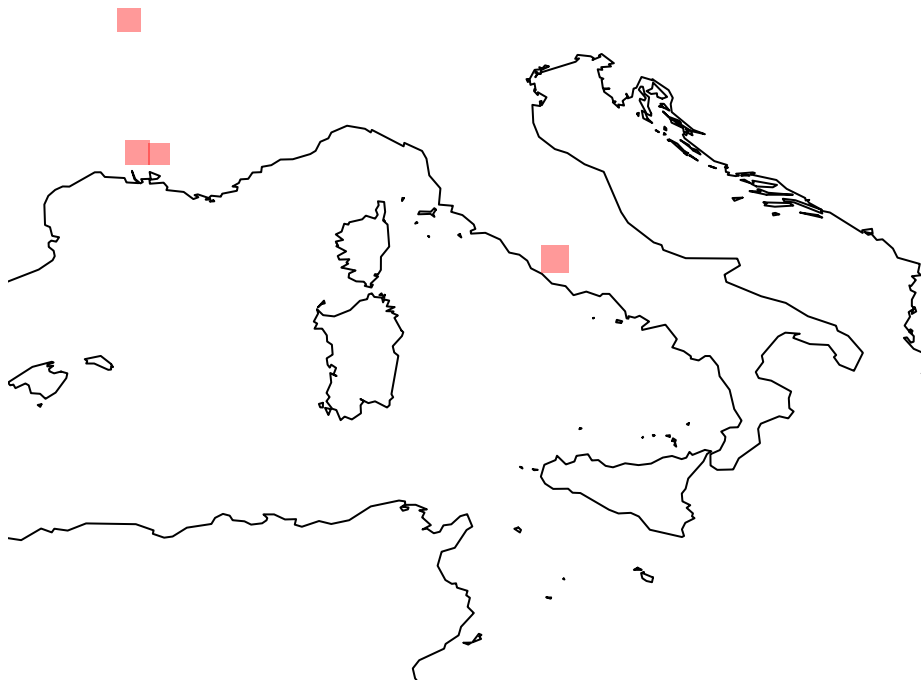

1480 cal. AD

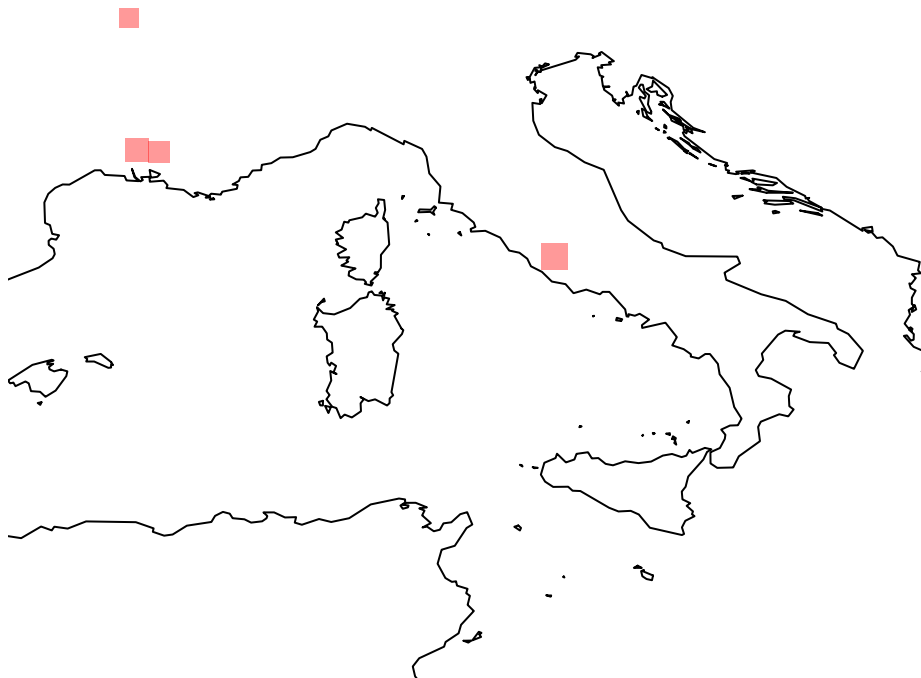

1485 cal. AD

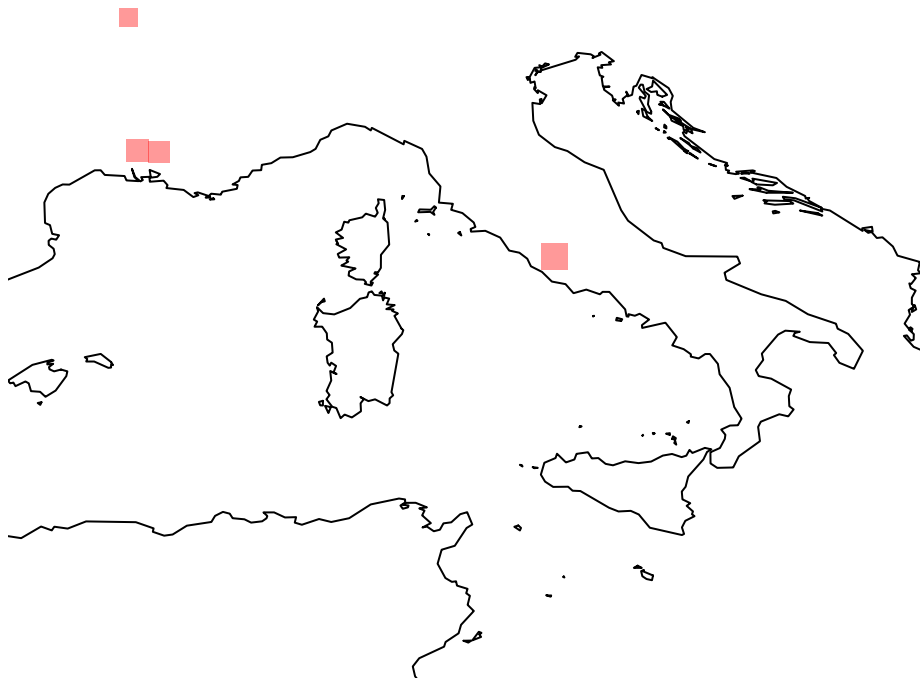

1490 cal. AD

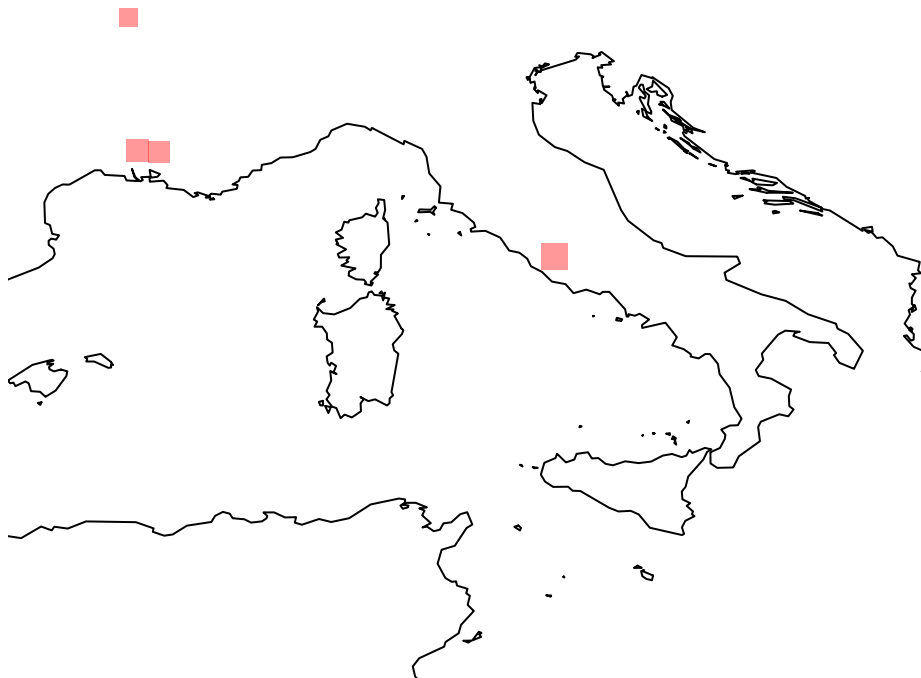

1495 cal. AD

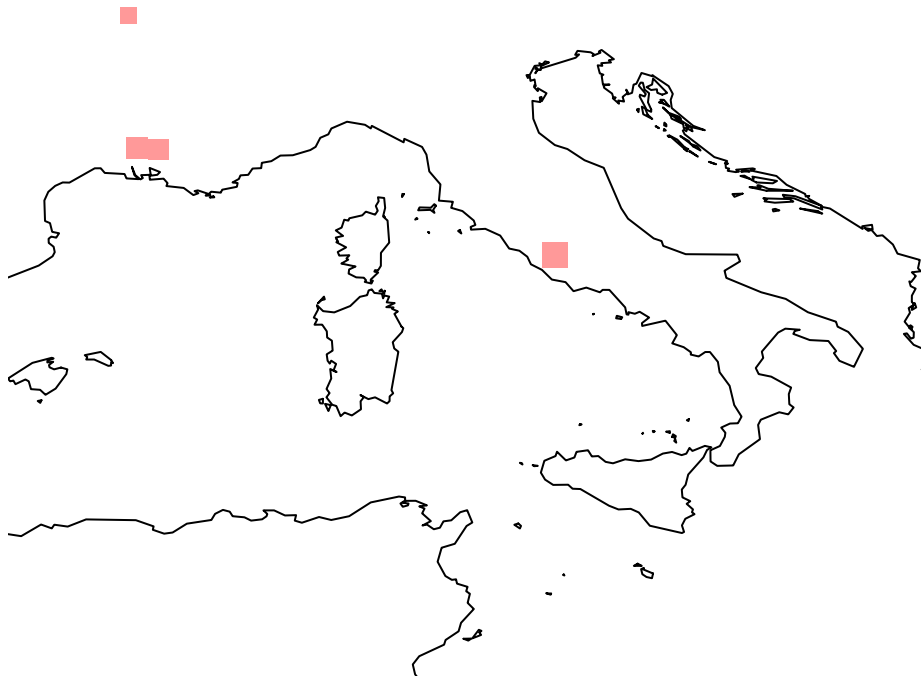

1500 cal. AD

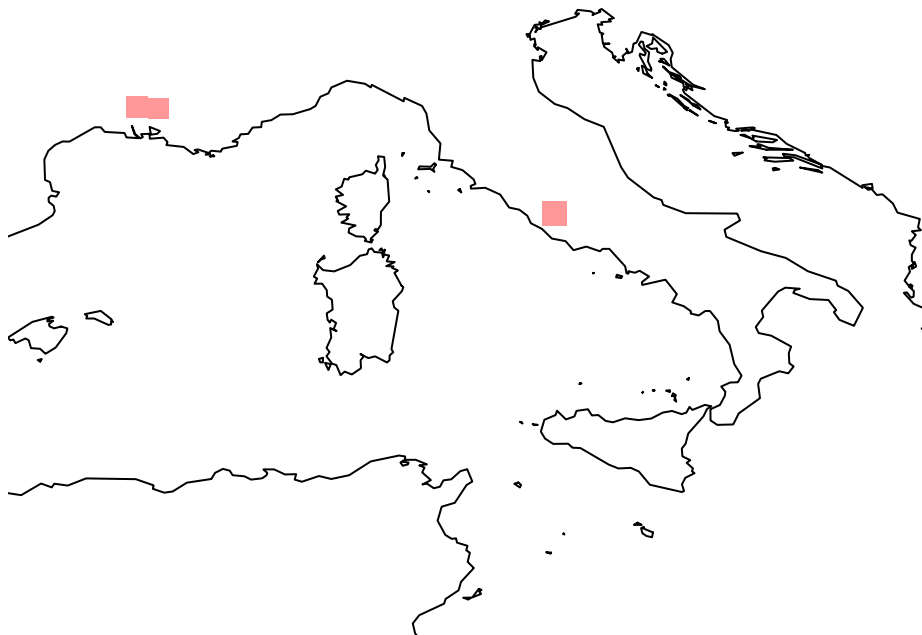

1505 cal. AD

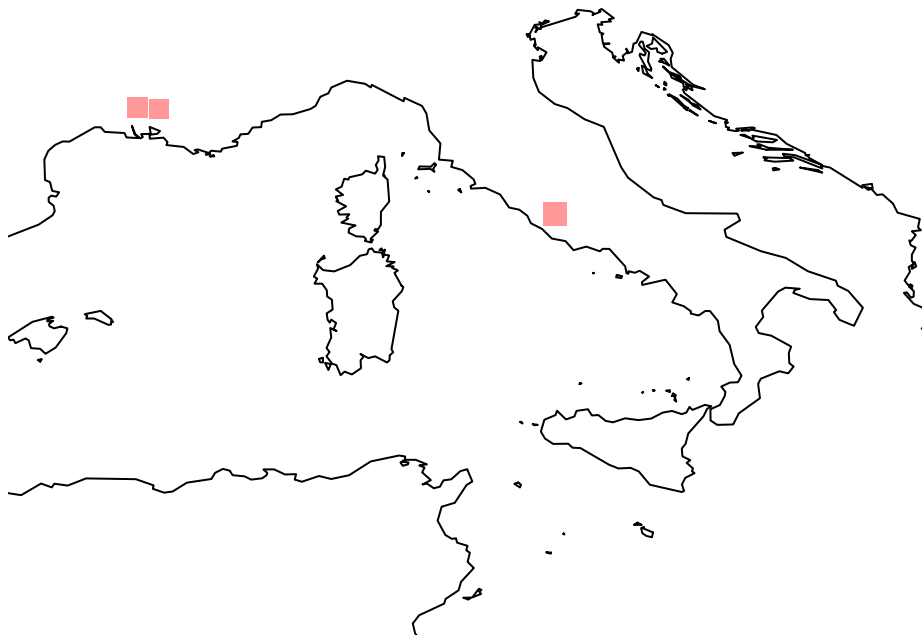

1510 cal. AD

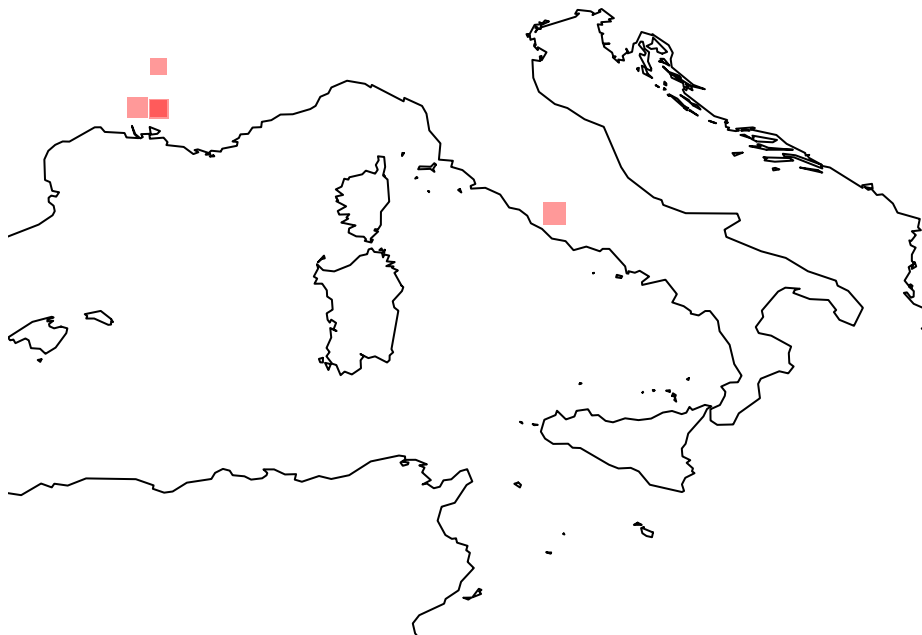



1515 cal. AD

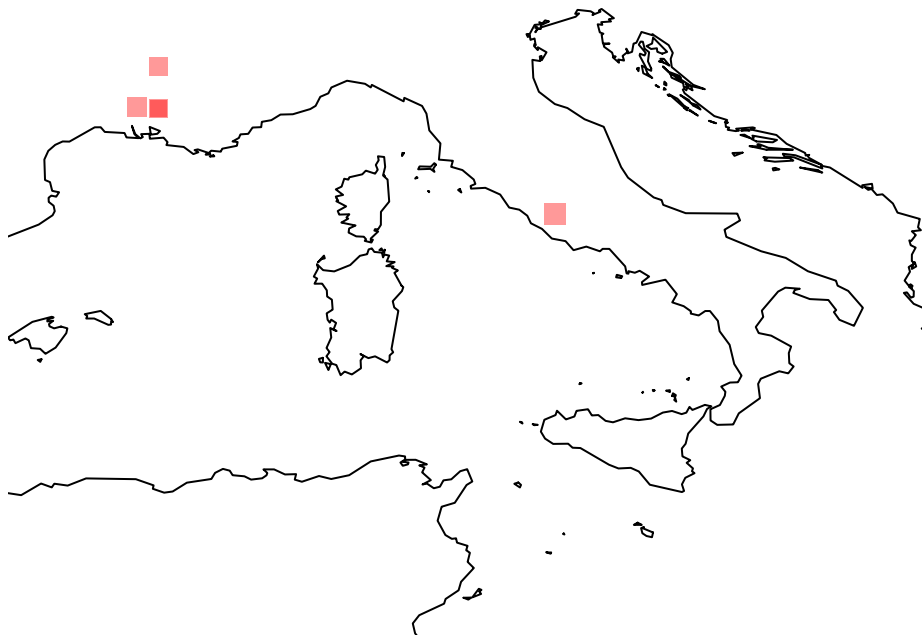

1520 cal. AD

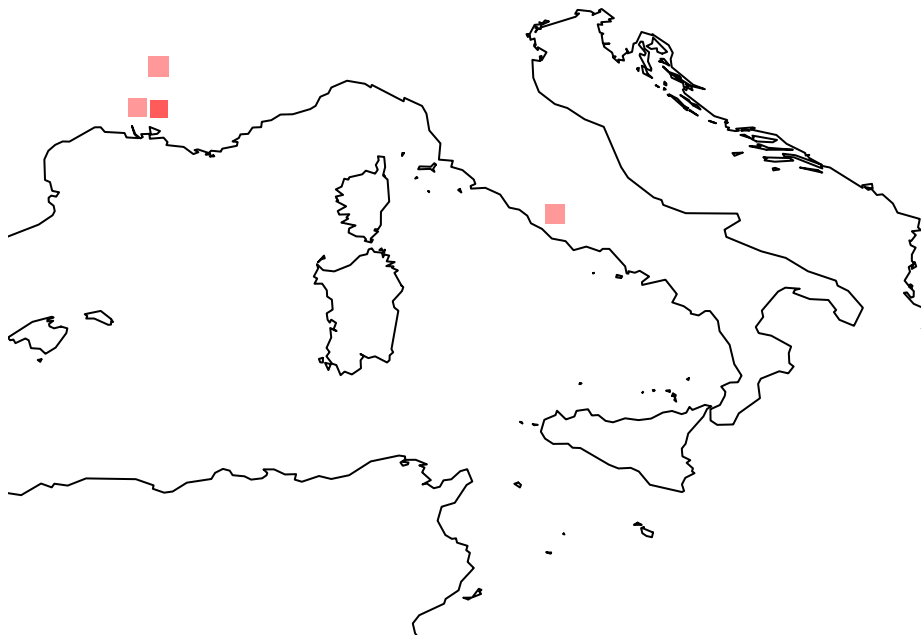

1525 cal. AD

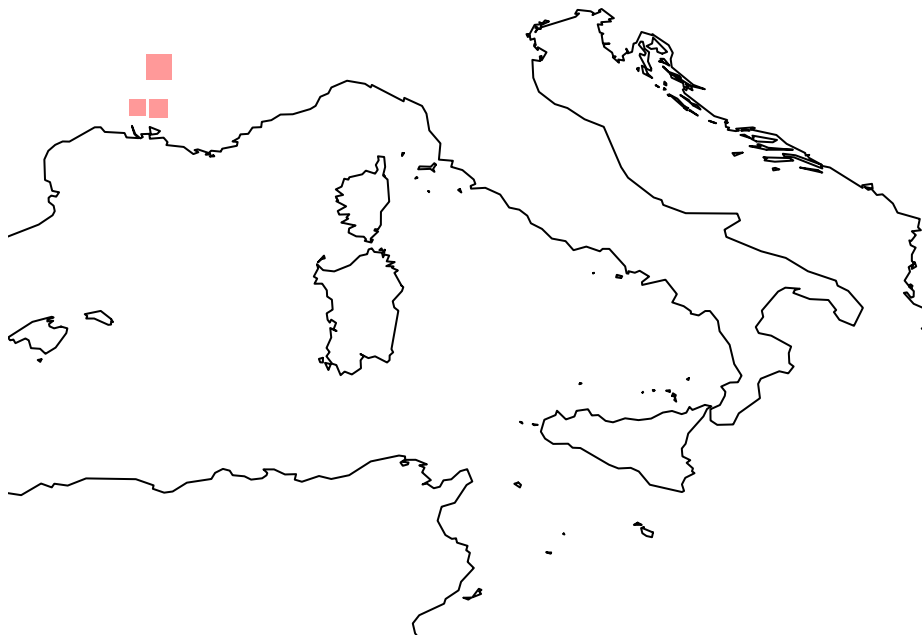

1530 cal. AD

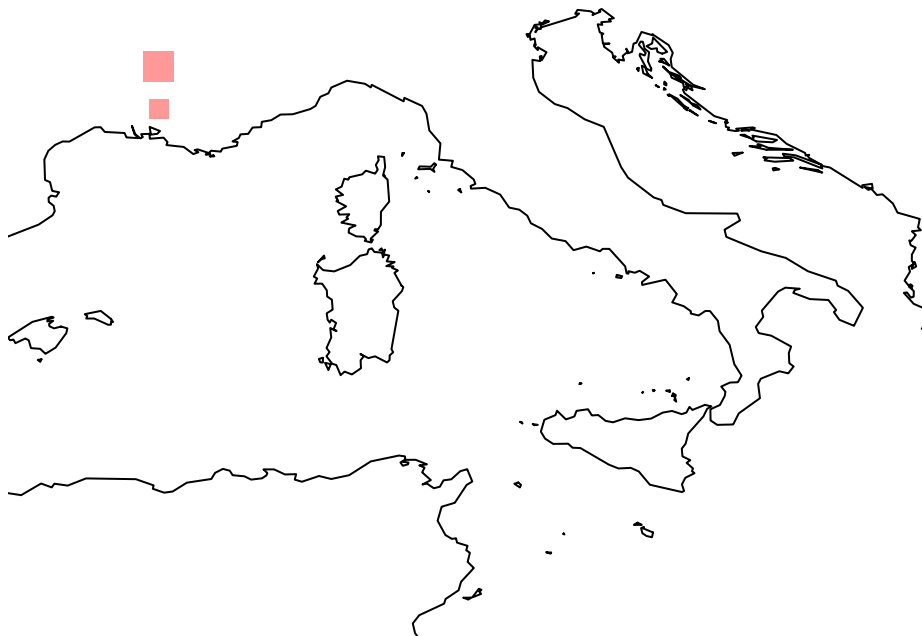

1535 cal. AD

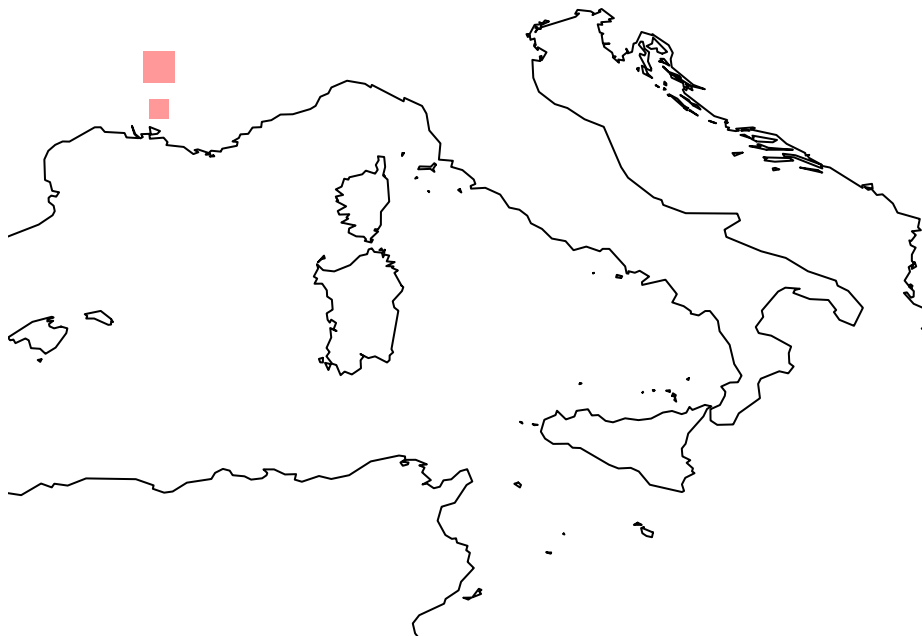

1540 cal. AD

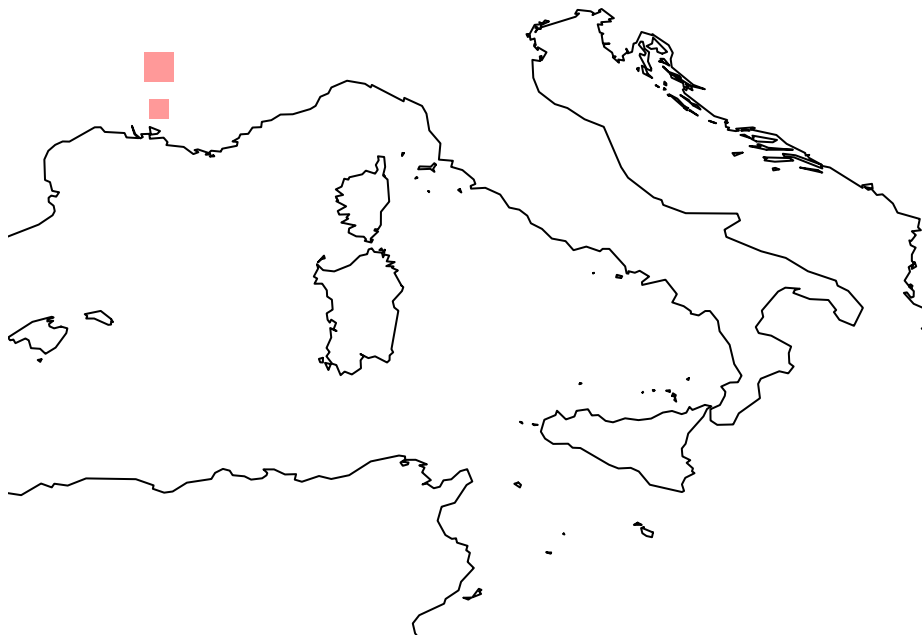

1545 cal. AD



1550 cal. AD





1555 cal. AD

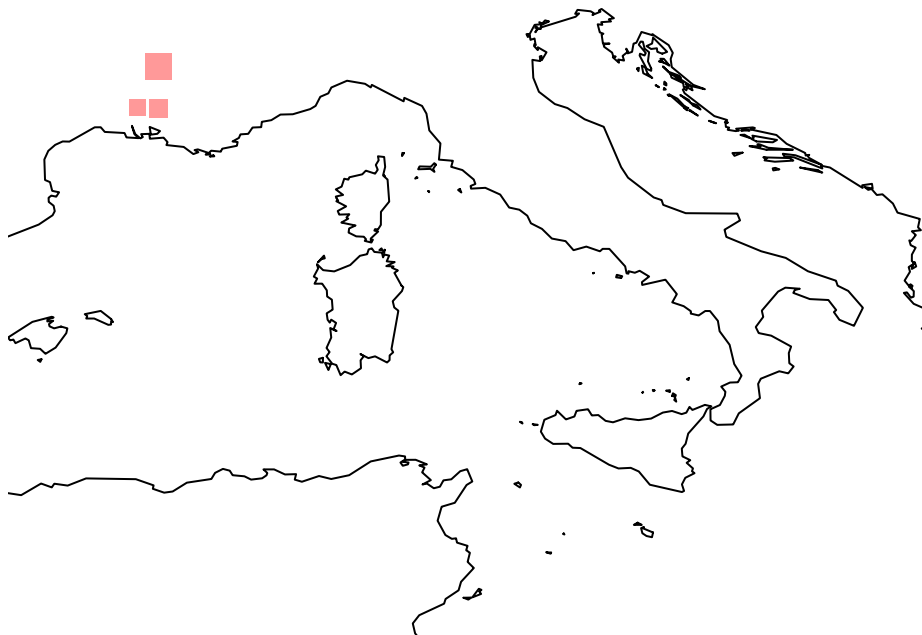

1560 cal. AD

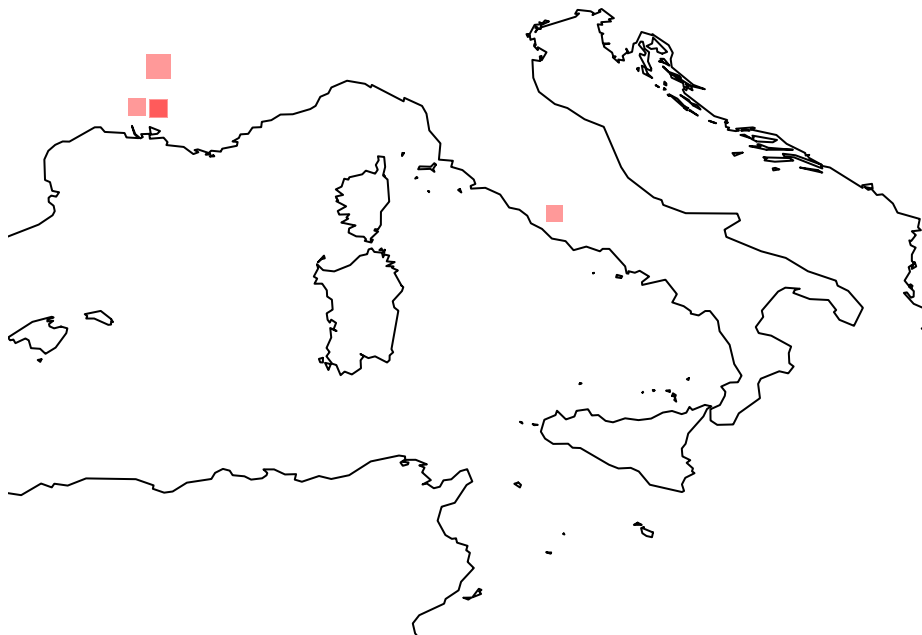

1565 cal. AD

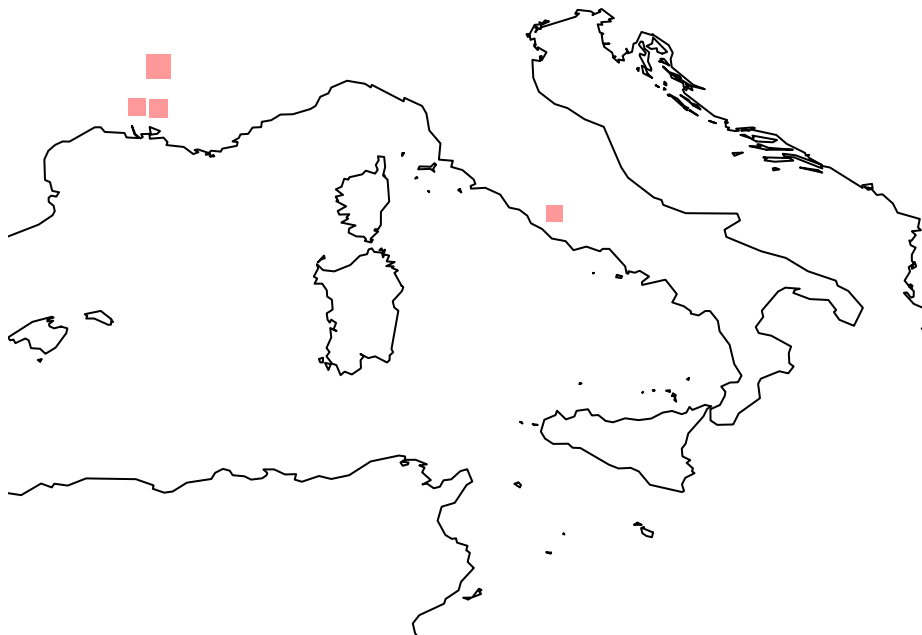

1570 cal. AD



1575 cal. AD

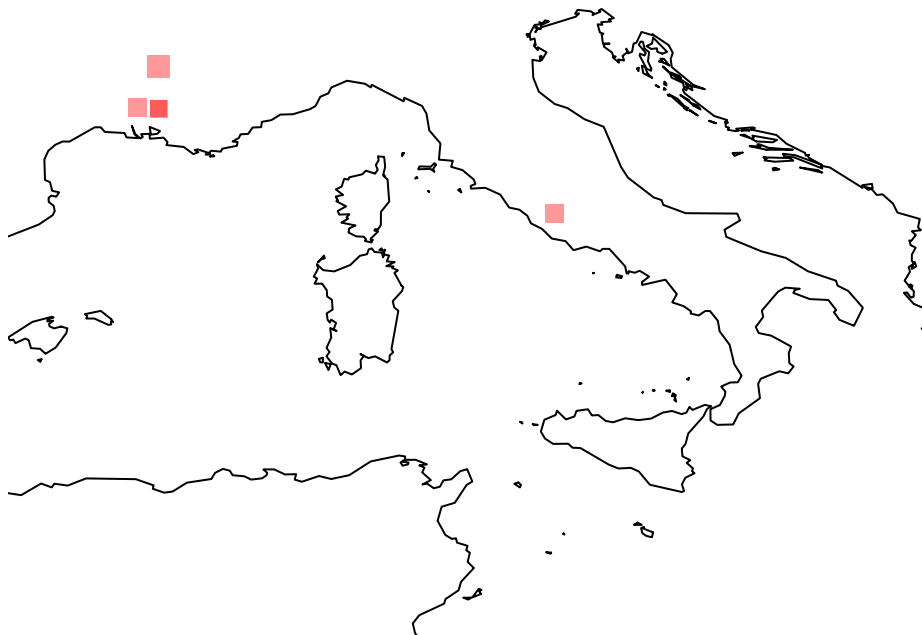

1580 cal. AD

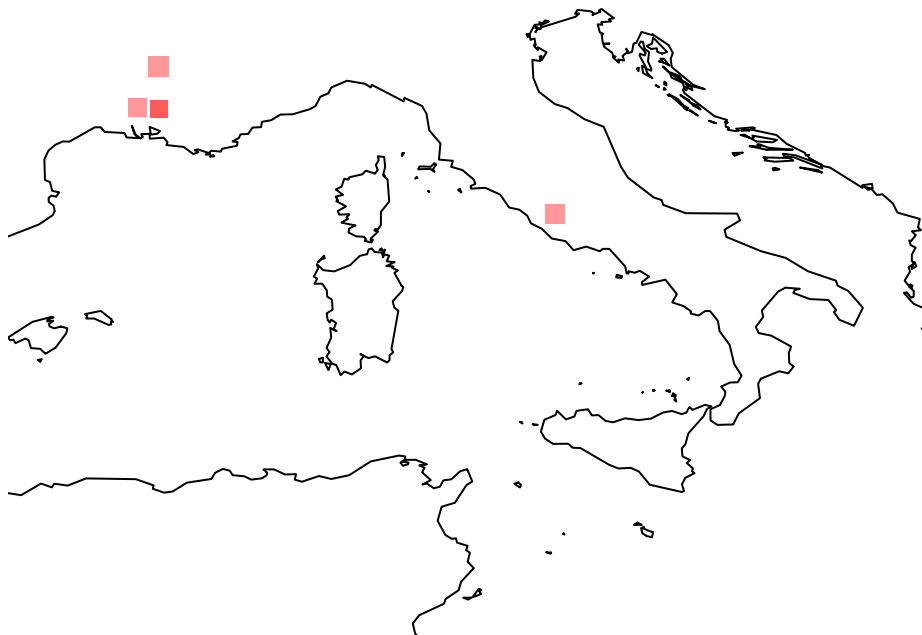

1585 cal. AD



1590 cal. AD





1595 cal. AD



1600 cal. AD



1605 cal. AD

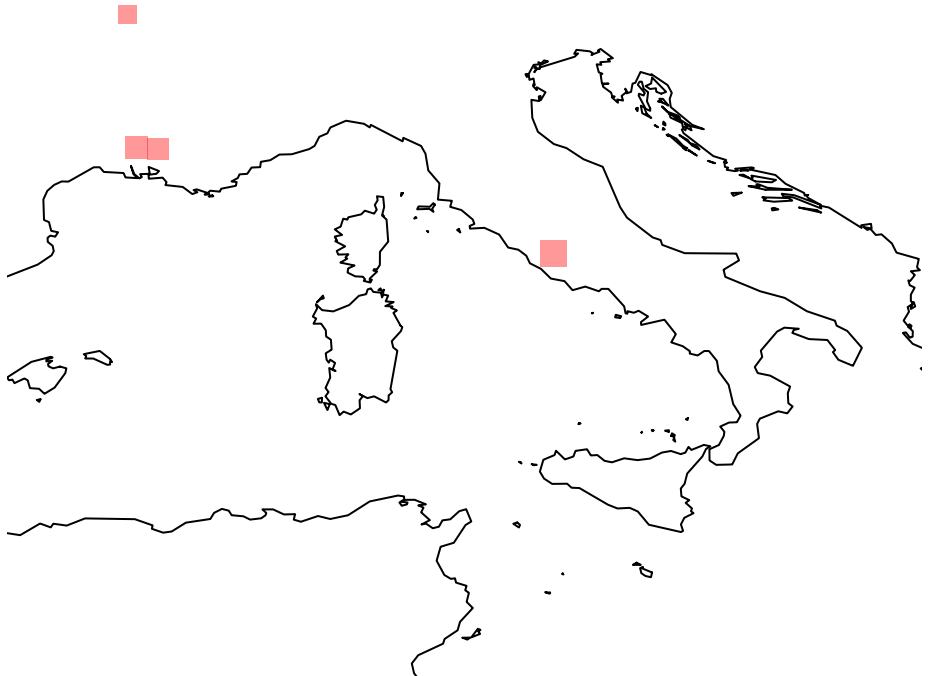

1610 cal. AD

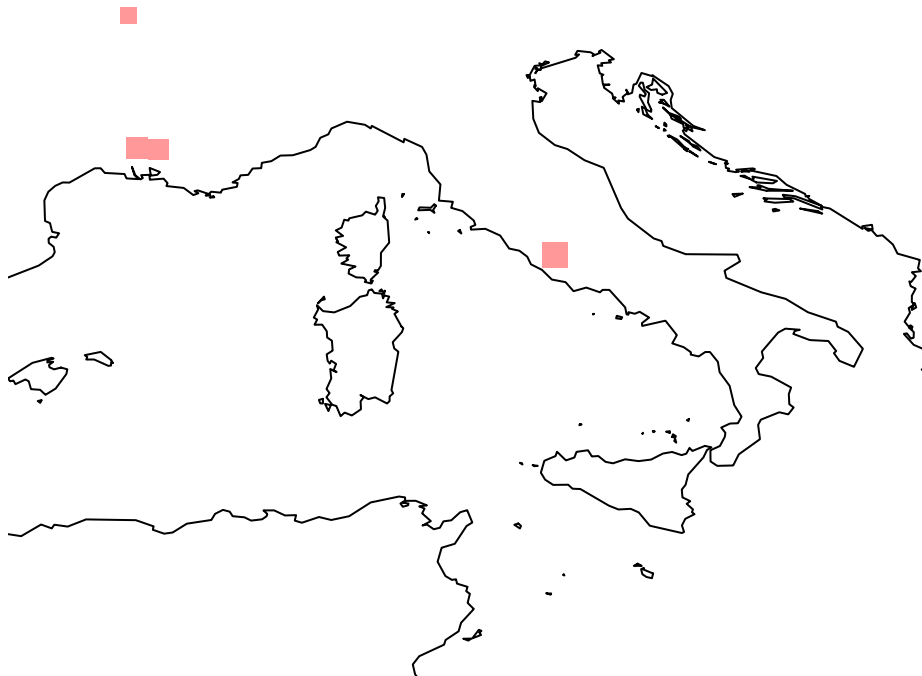

1615 cal. AD

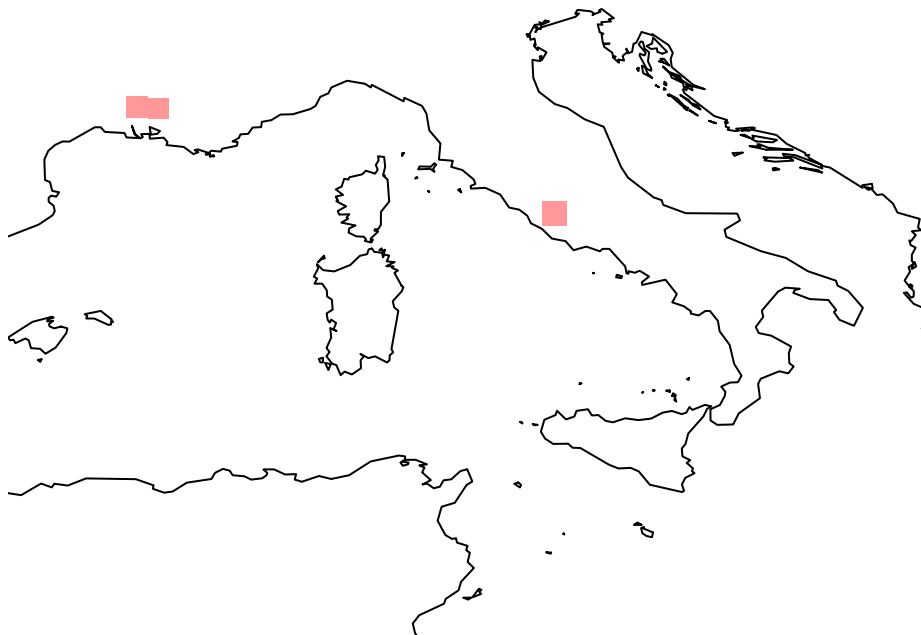

1620 cal. AD

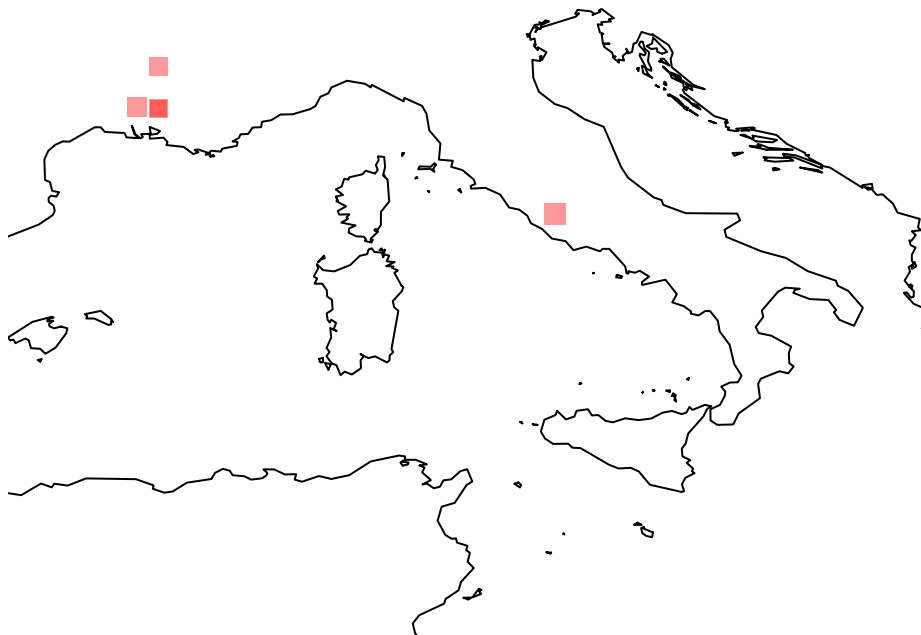

1625 cal. AD



1630 cal. AD

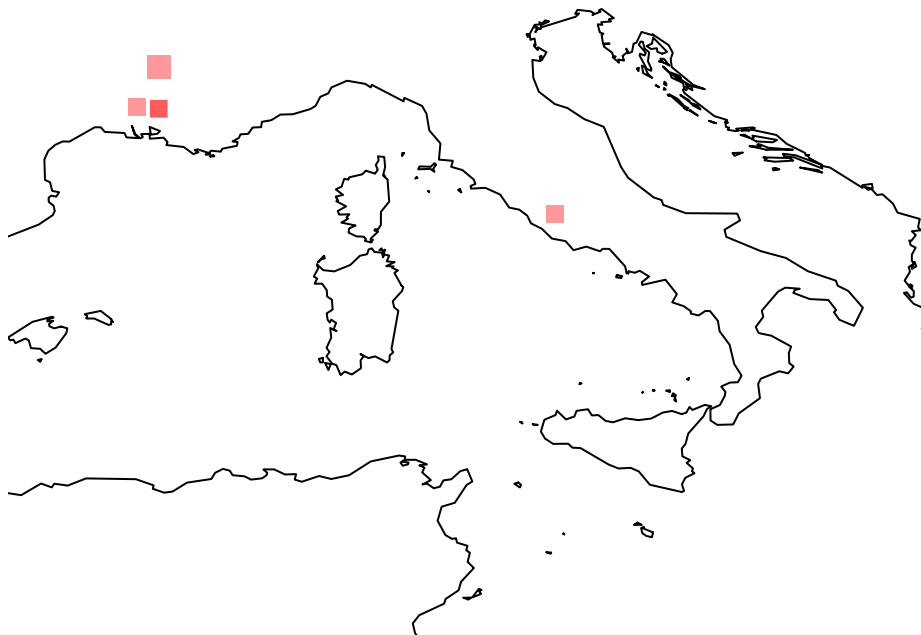



1635 cal. AD

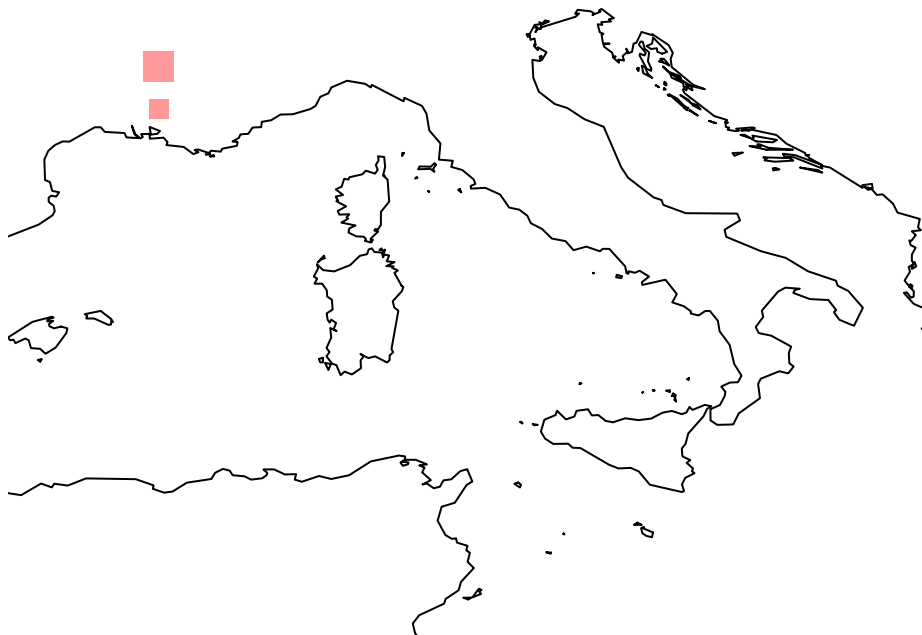

1640 cal. AD

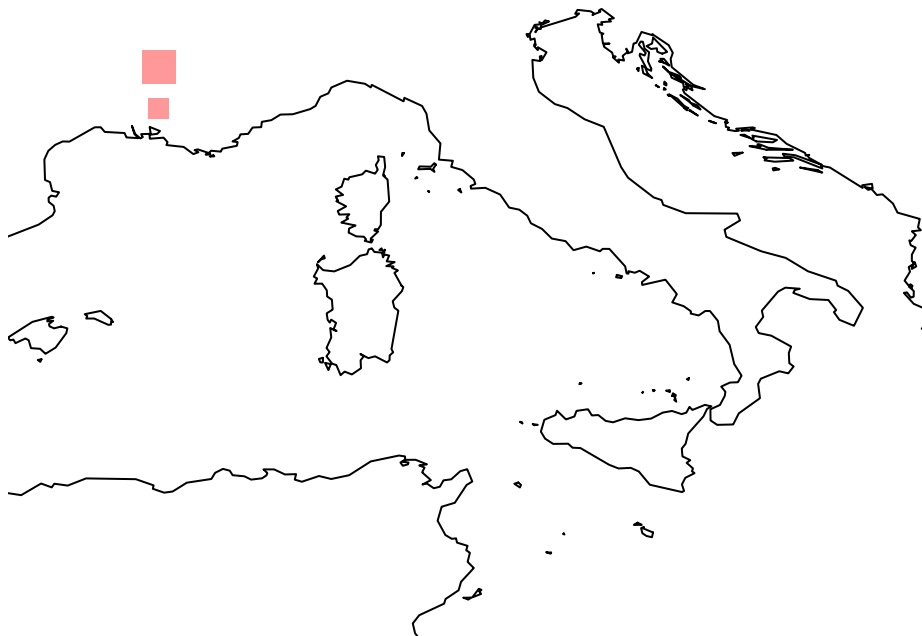

1645 cal. AD

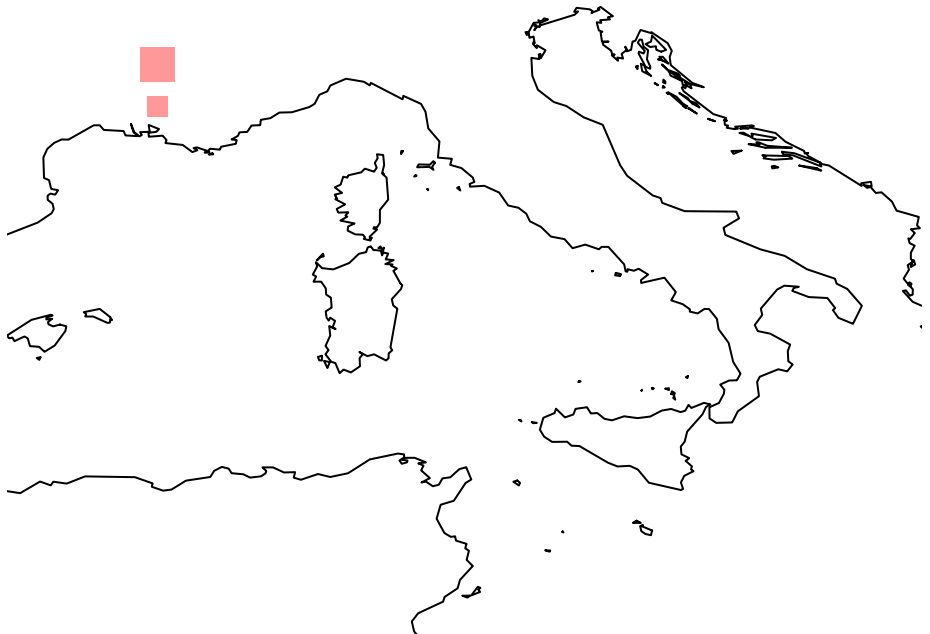

1650 cal. AD

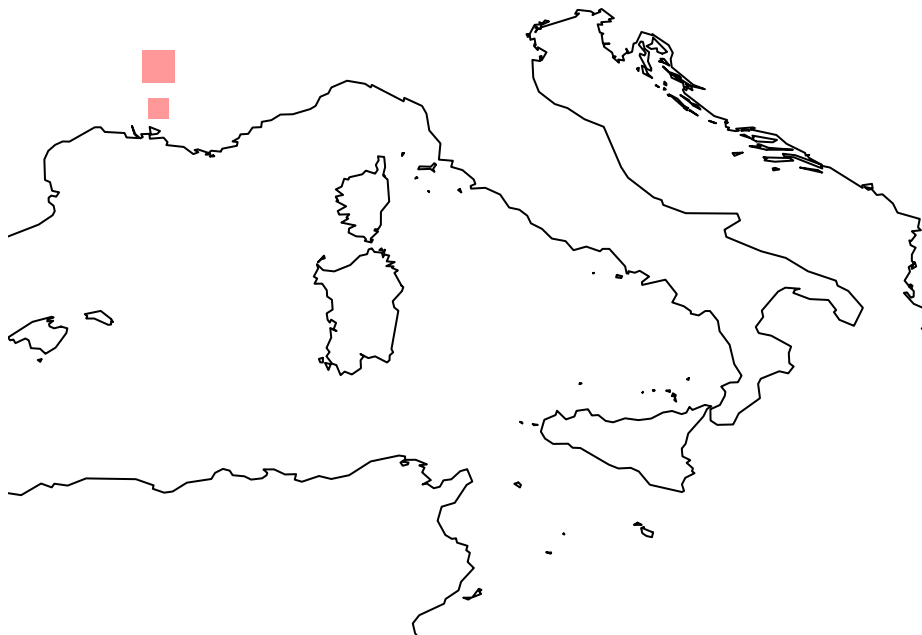

1655 cal. AD

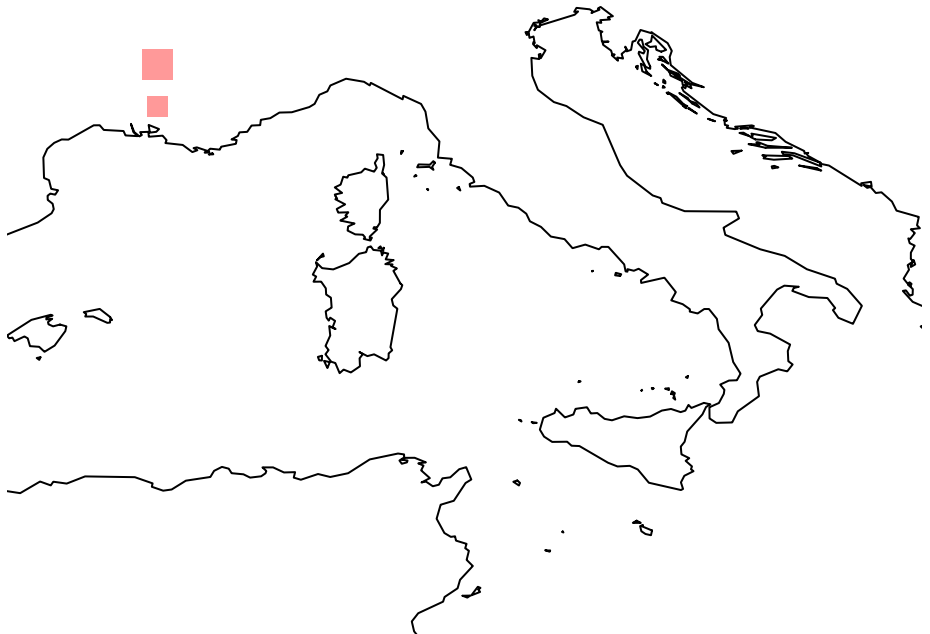

1660 cal. AD

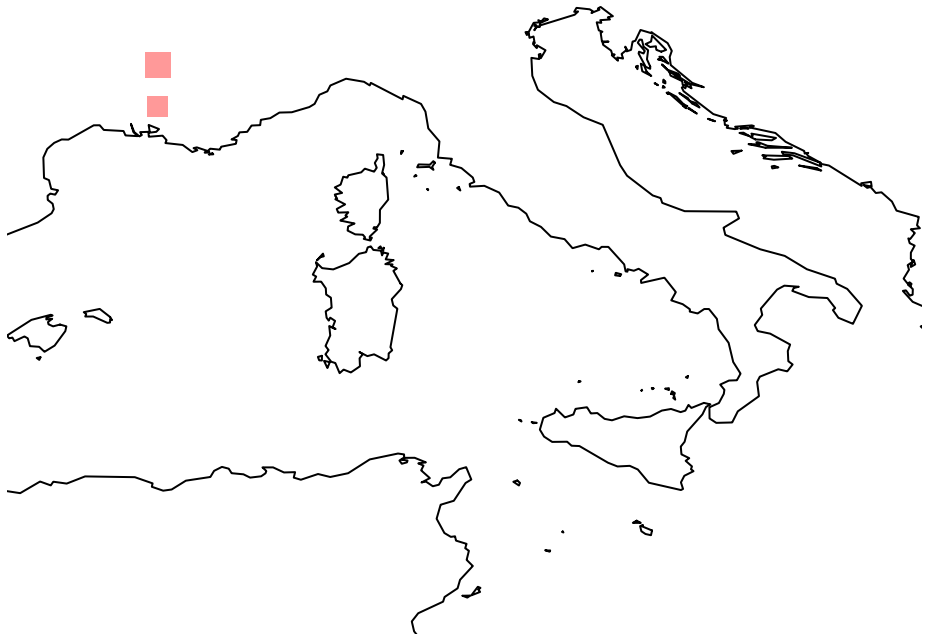

1665 cal. AD

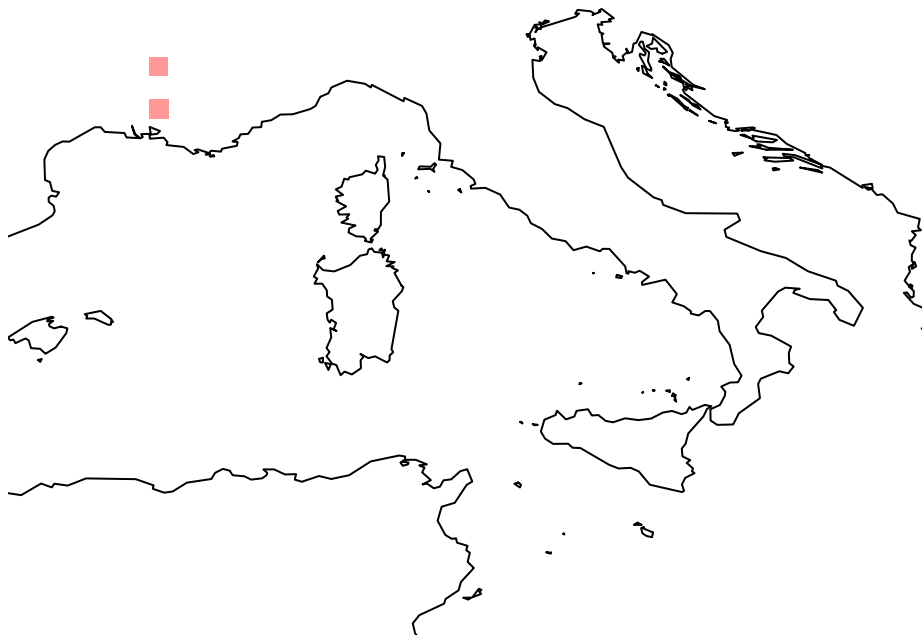

1670 cal. AD

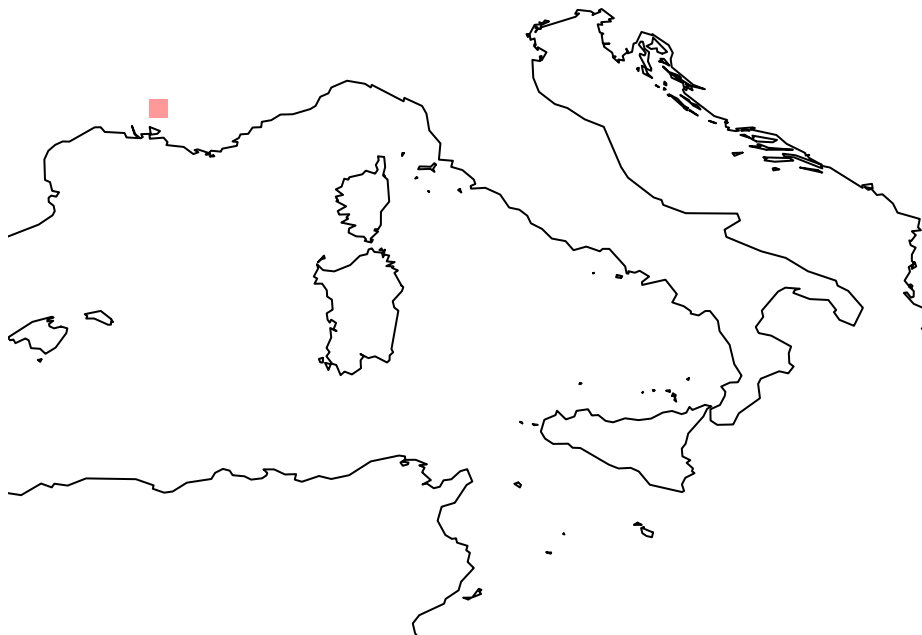



1675 cal. AD

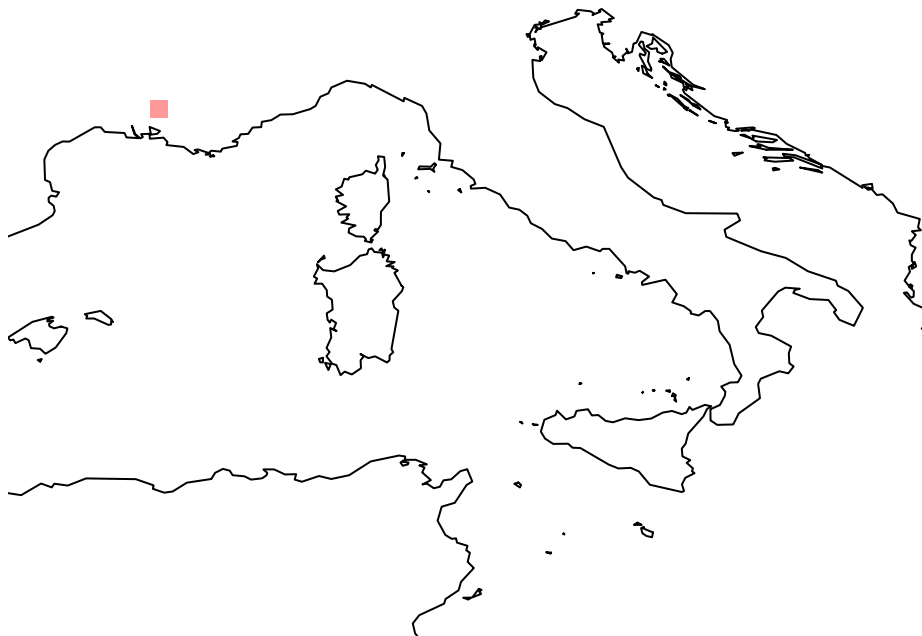

1680 cal. AD

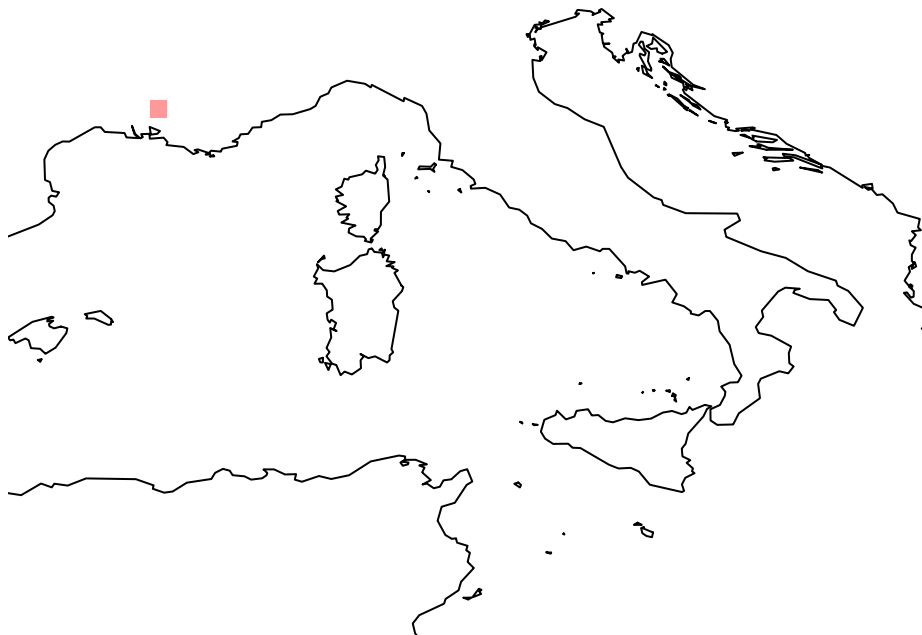

1685 cal. AD



1690 cal. AD

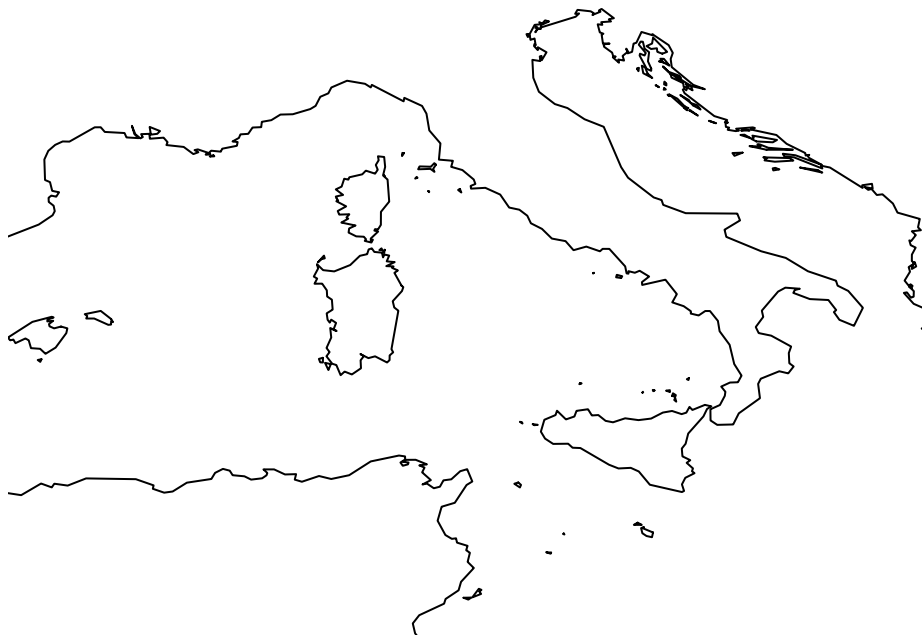

1695 cal. AD



1700 cal. AD



1705 cal. AD



1710 cal. AD





1715 cal. AD

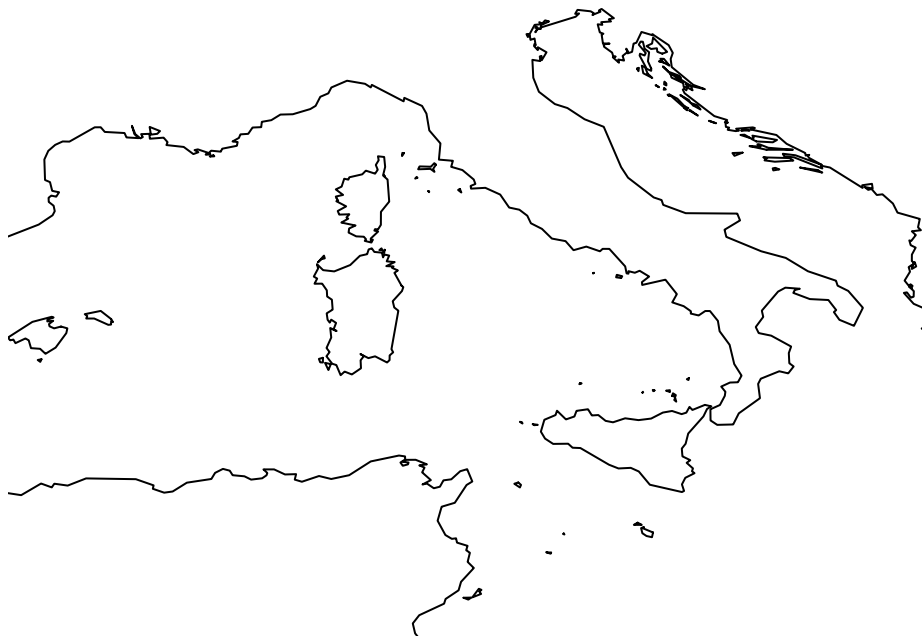

1720 cal. AD



1725 cal. AD



1730 cal. AD



1735 cal. AD

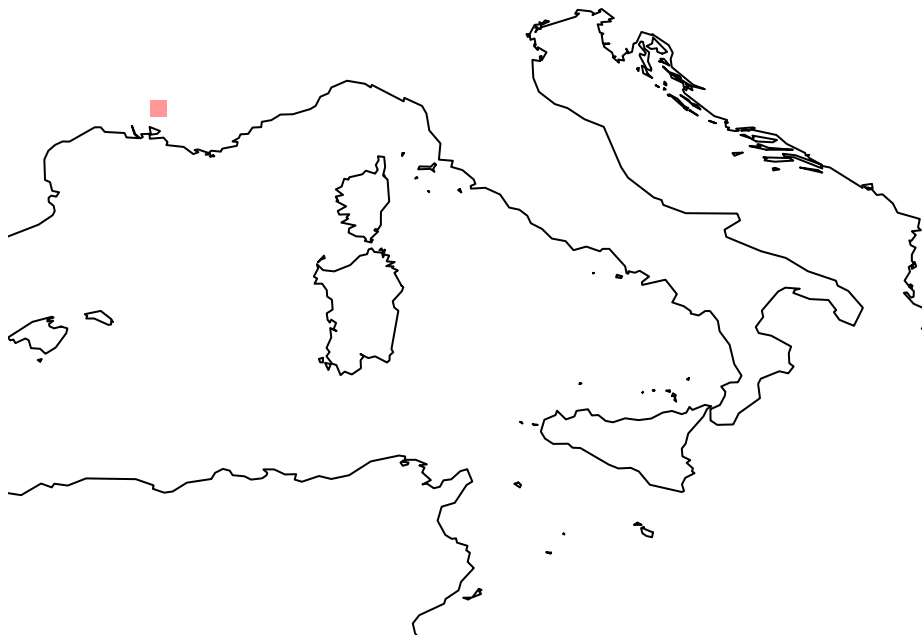

1740 cal. AD



1745 cal. AD

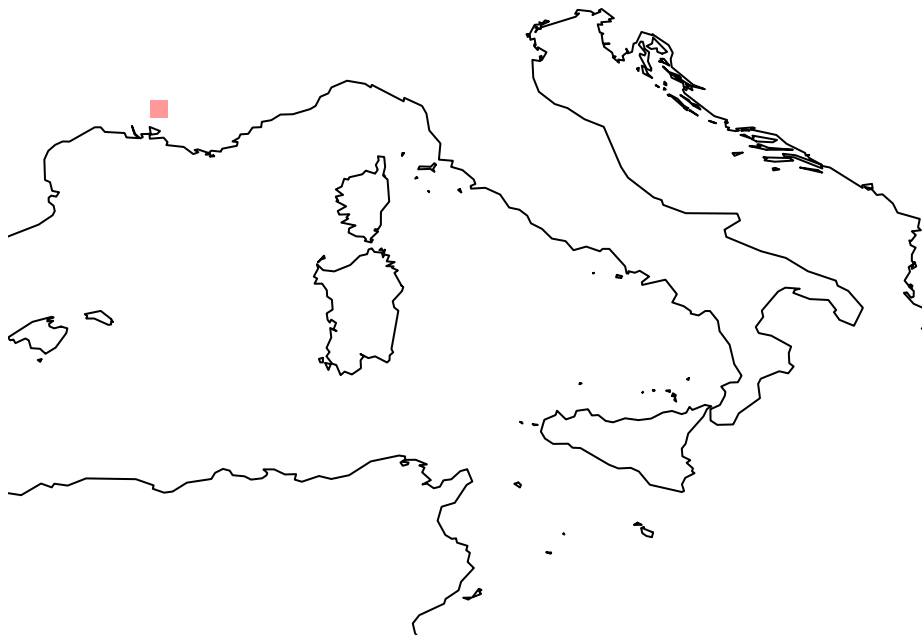

Supplement: MOESM5 [file 19738960]
