# Supplementary material for: Radiocarbon Dated Trends and Central Mediterranean Prehistory
Source: Springer Nature journal article supplement (doi:10.1007/s10963-021-09158-4), 2021-09-01
Supplement: MOESM3 [file 19738960]

Lab	BP	SD	Site	d13C	mcode	material	lat	long
UBA-35589	4106	35	Ggantija		C	charcoal	36.04715	14.269
UBA-33707	3962	50	Ggantija		Sd	Triticum	36.04715	14.269
UBA-31032	2856	32	In Nuffara		Sd	Fabaceae (possibly Pisum)	36.041471	14.273827
UBA-31033	2890	36	In Nuffara		Sd	Hordeum	36.041471	14.273827
UBA-31031	2924	43	In Nuffara		Sd	vesicular cerealia fragment	36.041471	14.273827
UBA-31034	3065	30	In Nuffara		Sd	Triticum cf. aestivum/durum/turgidum	36.041471	14.273827
UBA-33024	2824	39	In Nuffara		C	Charcoal	36.041471	14.273827
UBA-37669	4693	31	Kordin III	-20.5	A	Sheep Mandible hinge	35.87722	14.509054
UBA-37665	4737	46	Kordin III	-20.6	A	Sheep Metacarpal	35.87722	14.509054
UBA-33023	4581	40	Kordin III		C	Charcoal	35.87722	14.509054
UBA-37860	4628	34	Kordin III		C	Betula charcoal	35.87722	14.509054
UBA-33020	4741	45	Kordin III		C	Charcoal	35.87722	14.509054
UBA-33019	4803	50	Kordin III		C	Charcoal	35.87722	14.509054
UBA-33017	4363	40	Kordin III		Sd	Triticum	35.87722	14.509054
UBA-33021	4391	34	Kordin III		Sd	Hordeum vulgare	35.87722	14.509054
UBA-33015	4593	31	Kordin III		Sd	Triticum	35.87722	14.509054
UBA-33018	4614	33	Kordin III		Sd	Hordeum	35.87722	14.509054
UBA-33016	4684	46	Kordin III		Sd	Hordeum	35.87722	14.509054
UBA-31046	6172	39	Santa Verna		Sd	Fabaceae	36.045765	14.25862
UBA-31047	6267	40	Santa Verna		Sd	Hordeum/Triticum apex	36.045765	14.25862
UBA-37689	6171	41	Santa Verna	-20.8	A	Cattle Phalanx	36.045765	14.25862
UBA-37858	4491	43	Santa Verna		C	Olea charcoal	36.045765	14.25862
UBA-37859	6409	38	Santa Verna		C	Ulmus charcoal	36.045765	14.25862
UBA-37690	774	26	Santa Verna	-18.8	H	H. sapiens L. Man. M2	36.045765	14.25862
UBA-31040	468	29	Santa Verna		Sd	cf. Pisum (not sativum?) (intrusive)	36.045765	14.25862
UBA-33026	4324	31	Santa Verna		Sd	cf. Spozpiuzus (intrusive)	36.045765	14.25862
UBA-31045	4491	52	Santa Verna		Sd	Hordeum/Triticum	36.045765	14.25862
UBA-33025	4500	33	Santa Verna		Sd	Lens	36.045765	14.25862
UBA-31038	4501	34	Santa Verna		Sd	Hordeum	36.045765	14.25862
UBA-31035	4525	35	Santa Verna		Sd	Pisum sativum	36.045765	14.25862
UBA-31050	4636	43	Santa Verna		Sd	cf. Pisum sativum	36.045765	14.25862
UBA-31049	4664	41	Santa Verna		Sd	Hordeum/Triticum	36.045765	14.25862
UBA-31041	4908	37	Santa Verna		Sd	Triticum body	36.045765	14.25862
UBA-33706	4945	87	Santa Verna		Sd	Triticum	36.045765	14.25862
UBA-31048	6151	33	Santa Verna		Sd	cf. Hordeum	36.045765	14.25862
UBA-31039	6175	61	Santa Verna		Sd	Hordeum/Triticum (apex)	36.045765	14.25862
UBA-31043	6181	40	Santa Verna		Sd	Hordeum (cf. hulled straight)	36.045765	14.25862
UBA-31037	6193	48	Santa Verna		Sd	cf. Hordeum	36.045765	14.25862
UBA-31044	6239	37	Santa Verna		Sd	Fabaceae (? Lentil or pea)	36.045765	14.25862
UBA-31042	6412	44	Santa Verna		Sd	Triticum cf. dicoccum	36.045765	14.25862
UBA-35590	5756	35	Skorba		C	charcoal	35.920698	14.377603
UBA-33711	5996	46	Skorba		Sd	Lens sp. seed	35.920698	14.377603
UBA-33708	6005	51	Skorba		Sd	Hordeum	35.920698	14.377603
UBA-33709	6035	54	Skorba		Sd	Hordeum	35.920698	14.377603
UBA-33710	6158	51	Skorba		Sd	Hordeum	35.920698	14.377603
UBA-31711	3891	32	Tac-Cawla	-19.5	A	Sus	36.036936	14.240274
UBA-40322	3903	43	Tac-Cawla	-20.5	A	cow tooth	36.036936	14.240274
UBA-37683	3959	37	Tac-Cawla	-21.1	A	Sheep Humerus	36.036936	14.240274
UBA-29835	4032	34	Tac-Cawla	-21	A	cattle tooth	36.036936	14.240274
UBA-29836	4182	37	Tac-Cawla	-20.1	A	pig tooth	36.036936	14.240274
UBA-29833	4496	41	Tac-Cawla	-20.6	A	sheep or goat tooth	36.036936	14.240274
UBA-40320	4508	45	Tac-Cawla	-19.9	A	sheep scapula	36.036936	14.240274
UBA-37681	4554	38	Tac-Cawla	-20.5	A	Cattle Metacarpal	36.036936	14.240274
UBA-40321	4634	36	Tac-Cawla	-20.1	A	cow tooth	36.036936	14.240274
UBA-33027	3896	31	Tac-Cawla		C	Charcoal	36.036936	14.240274
UBA-37864	3744	40	Tac-Cawla		Sc	Triticum cf. aestivum / durum	36.036936	14.240274
UBA-37863	4500	36	Tac-Cawla		Sc	Lens sp. seed	36.036936	14.240274
UBA-37866	4500	33	Tac-Cawla		Sc	Triticum cf. aestivum / durum seed	36.036936	14.240274
UBA-37862	4517	38	Tac-Cawla		Sc	Hordeum vulgare	36.036936	14.240274
UBA-37865	4616	32	Tac-Cawla		Sc	Hordeum vulgare	36.036936	14.240274
UBA-30423	3858	36	Tac-Cawla		Sd	Lens sp.	36.036936	14.240274
UBA-30422	4018	40	Tac-Cawla		Sd	Pisum sp.	36.036936	14.240274
UBA-30416	4388	34	Tac-Cawla		Sd	Triticum cf. aestivum / durum	36.036936	14.240274
UBA-31713	4454	38	Tac-Cawla		Sd	Hordeum vullgarae	36.036936	14.240274
UBA-31714	4518	41	Tac-Cawla		Sd	Triticum sp.	36.036936	14.240274
UBA-30418	4524	34	Tac-Cawla		Sd	Lens sp.	36.036936	14.240274
UBA-30417	4530	37	Tac-Cawla		Sd	Hordeum vulgare	36.036936	14.240274
UBA-30419	4540	37	Tac-Cawla		Sd	cf. Hordeum vulgare	36.036936	14.240274
UBA-30414	4546	37	Tac-Cawla		Sd	Triticum cf. aestivum / durum	36.036936	14.240274
UBA-30413	4610	37	Tac-Cawla		Sd	Lens sp	36.036936	14.240274
UBA-30420	4679	41	Tac-Cawla		Sd	Lens sp.	36.036936	14.240274
UBA-30421	4738	35	Tac-Cawla		Sd	Hordeum vulgare	36.036936	14.240274
UBA-33028	4776	35	Tac-Cawla		Sd	cf. Triticum	36.036936	14.240274
UBA-30415	4849	38	Tac-Cawla		Sd	Triticum cf. aestivum / durum	36.036936	14.240274
UBA-35591	3479	30	Tarxien Cemetery		Sd	Vicia faba	35.869187	14.511893
UBA-35592	3567	30	Tarxien Cemetery		Sd	Vicia faba	35.869187	14.511893
UBA-35271	3940	36	Xaghra		H	Tooth roots	36.046375	14.264873
UBA-35274	4076	42	Xaghra	-19.5	H	Tooth roots	36.046375	14.264873
UBA-35273	3989	38	Xaghra	-19.2	H	Tooth roots	36.046375	14.264873
UBA-35272	4061	37	Xaghra	failed	H	Tooth roots	36.046375	14.264873
UBA-32019	3842	28	Xaghra	-19.3	H	Mandible R 2 Perm molar	36.046375	14.264873
UBA-32036	3846	33	Xaghra	-19.2	H	Mandible R 2 Perm molar	36.046375	14.264873
UBA-32014	3849	26	Xaghra	-19	H	Mandible L 3 Perm molar	36.046375	14.264873
UBA-32033	3857	36	Xaghra	-19.4	H	Mandible L 2 Perm molar	36.046375	14.264873
UBA-32043	3877	32	Xaghra	-18.7	H	Mandible R 2 Perm molar tooth and roots are fully developed, but apices are open: Adolescent/Young Adult	36.046375	14.264873
UBA-32027	3893	28	Xaghra	-18.9	H	Mandible L 3 Perm molar	36.046375	14.264873
UBA-32015	3903	31	Xaghra	-18.9	H	Mandible L 2 Perm molar	36.046375	14.264873
UBA-32018	3904	30	Xaghra	-19.2	H	Mandible R 2 Perm molar	36.046375	14.264873
UBA-35288	3923	32	Xaghra	-19.2	H	Tooth roots	36.046375	14.264873
UBA-32045	3926	28	Xaghra	-19.3	H	Maxillary L 2 Perm molar	36.046375	14.264873
UBA-32020	3942	28	Xaghra	-18.9	H	Maxillary R 3 Perm molar	36.046375	14.264873
UBA-32022	3947	32	Xaghra	-19.3	H	Mandible L 2 Perm molar	36.046375	14.264873
UBA-32062	3952	55	Xaghra	-19.5	H	Mandible L 2 Perm molar	36.046375	14.264873
UBA-35290	3953	42	Xaghra	-18.7	H	Tooth roots	36.046375	14.264873
UBA-32023	3955	31	Xaghra	-19.5	H	Mandible R 2 Perm molar	36.046375	14.264873
UBA-32051	3963	32	Xaghra	-19.4	H	Mandible R 2 Perm molar	36.046375	14.264873
UBA-32053	3970	25	Xaghra	-19.6	H	Mandible R 2 Perm molar	36.046375	14.264873
UBA-32032	3983	48	Xaghra	-19.5	H	Maxillary R 2 Perm molar	36.046375	14.264873
UBA-32034	3986	34	Xaghra	-19.6	H	Maxillary R 2 Perm molar	36.046375	14.264873
UBA-32052	3987	27	Xaghra	-19.1	H	Mandible R 2 Perm molar	36.046375	14.264873
UBA-35266	3995	54	Xaghra	-19.8	H	Tooth -- crown to be returned	36.046375	14.264873
UBA-32017	4009	30	Xaghra	-19.5	H	Mandible R 2 Perm molar	36.046375	14.264873
UBA-32016	4017	31	Xaghra	-19	H	Mandible R 2 Perm molar	36.046375	14.264873
UBA-32044	4023	26	Xaghra	-19.7	H	Maxillary R 2 Perm molar	36.046375	14.264873
UBA-35289	4031	32	Xaghra	-19.3	H	Tooth roots	36.046375	14.264873
UBA-32037	4031	36	Xaghra	-19.2	H	Maxillary R 2 Perm molar	36.046375	14.264873
UBA-32009	4032	31	Xaghra	-19.8	H	Mandible L 3 Perm molar	36.046375	14.264873
UBA-32012	4033	27	Xaghra	-19.7	H	Maxillary L 3 Perm molar	36.046375	14.264873
UBA-35281	4034	36	Xaghra	-19.4	H	Mandible frags	36.046375	14.264873
UBA-35291	4036	30	Xaghra	-19.7	H	Tooth roots	36.046375	14.264873
UBA-32057	4036	27	Xaghra	-19.5	H	Maxillary R 2 Perm molar	36.046375	14.264873
UBA-35270	4039	39	Xaghra	-19.4	H	Tooth -- crown to be returned	36.046375	14.264873
UBA-32060	4039	29	Xaghra	-19.4	H	Mandible L 2 Perm molar	36.046375	14.264873
UBA-32024	4043	27	Xaghra	-19.8	H	Mandible R 2 Perm molar	36.046375	14.264873
UBA-32039	4047	39	Xaghra	-19.6	H	Mandible L 2 Perm molar	36.046375	14.264873
UBA-32042	4047	32	Xaghra	-19.5	H	Mandible R 2 Perm molar	36.046375	14.264873
UBA-32031	4048	40	Xaghra	-19.4	H	Maxillary R 2 Perm premolar	36.046375	14.264873
UBA-35269	4061	50	Xaghra	-19.4	H	Tooth -- crown to be returned	36.046375	14.264873
UBA-32049	4065	26	Xaghra	-19.3	H	Maxillary R 2 Perm molar	36.046375	14.264873
UBA-32025	4066	27	Xaghra	-19.2	H	Mandible L 2 Perm molar	36.046375	14.264873
UBA-32021	4069	33	Xaghra	-19.4	H	Mandible L 2 Perm molar	36.046375	14.264873
UBA-32056	4099	27	Xaghra	-19.4	H	Maxillary R 3 Perm molar	36.046375	14.264873
UBA-32006	4102	30	Xaghra	-19	H	Mandible L 2 Perm molar	36.046375	14.264873
UBA-32048	4107	37	Xaghra	-19.5	H	Maxillary R 3 Perm molar	36.046375	14.264873
UBA-32030	4109	34	Xaghra	-19.2	H	Mandible R 2 Perm molar	36.046375	14.264873
UBA-32028	4118	33	Xaghra	-19.4	H	Mandible R 3 Perm molar	36.046375	14.264873
UBA-35292	4124	64	Xaghra	-19.5	H	Tooth roots NB large error term; marginal fail for Chrono standards	36.046375	14.264873
UBA-32059	4128	29	Xaghra	-19.3	H	Maxillary L 2 Perm molar	36.046375	14.264873
UBA-32035	4129	39	Xaghra	-19.3	H	Mandible R 2 Perm molar	36.046375	14.264873
UBA-32050	4130	33	Xaghra	-19.5	H	Maxillary L 3 Perm molar	36.046375	14.264873
UBA-32013	4131	29	Xaghra	-19.6	H	Maxillary L 2 Perm molar	36.046375	14.264873
UBA-32047	4131	25	Xaghra	-19.3	H	Maxillary R 3 Perm molar	36.046375	14.264873
UBA-32061	4133	41	Xaghra	-19.7	H	Mandible L 2 Perm molar	36.046375	14.264873
UBA-32008	4136	30	Xaghra	-19.4	H	Maxillary L 2 Perm molar	36.046375	14.264873
UBA-35287	4140	39	Xaghra	-19.4	H	Tooth roots	36.046375	14.264873
UBA-32010	4147	31	Xaghra	-19.3	H	Maxillary R 3 Perm molar	36.046375	14.264873
UBA-32041	4150	45	Xaghra	-19.3	H	Mandible R 2 Perm molar	36.046375	14.264873
UBA-35283	4161	45	Xaghra	-19.8	H	Tooth roots	36.046375	14.264873
UBA-32038	4162	35	Xaghra	-19.4	H	Mandible R 2 Perm molar	36.046375	14.264873
UBA-32007	4184	33	Xaghra	-18.9	H	Mandible L 2 Perm molar	36.046375	14.264873
UBA-35293	4186	65	Xaghra	-19.6	H	Tooth roots	36.046375	14.264873
UBA-35282	4195	28	Xaghra	-19.3	H	Tooth roots	36.046375	14.264873
UBA-32040	4208	73	Xaghra	-19.6	H	Mandible R 2 Perm molar	36.046375	14.264873
UBA-32011	4215	31	Xaghra	-19.3	H	Mandible R 2 Perm molar	36.046375	14.264873
UBA-32026	4237	30	Xaghra	-19.2	H	Maxillary R 2 Perm molar	36.046375	14.264873
UBA-32003	4263	33	Xaghra	-19.5	H	Mandible L 2 Perm molar	36.046375	14.264873
UBA-35284	4286	49	Xaghra	-19.5	H	Tooth roots	36.046375	14.264873
UBA-35267	4308	56	Xaghra		H	Tooth -- crown to be retuned	36.046375	14.264873
UBA-32046	4351	29	Xaghra	-19.3	H	Maxillary R 2 Perm molar	36.046375	14.264873
UBA-32005	4727	52	Xaghra	-19.1	H	Mandible R 2 Perm molar	36.046375	14.264873
UBA-35296	4068	46	Xemxija	-19.3	H	Tooth roots	35.949666	14.380622
UBA-35298	4168	38	Xemxija	-19.1	H	Tooth roots	35.949666	14.380622
UBA-35295	4177	36	Xemxija	-19.5	H	Tooth roots	35.949666	14.380622
UBA-35297	4442	33	Xemxija	-19.6	H	Tooth roots	35.949666	14.380622
UBA-35294	4602	31	Xemxija	-19.1	H	Tooth roots	35.949666	14.380622
