# Supplementary material for: Radiocarbon Dated Trends and Central Mediterranean Prehistory
Source: Springer Nature journal article supplement (doi:10.1007/s10963-021-09158-4), 2021-09-01
Supplement: MOESM4 [file 19738960]

**Bibliography for date list, Parkinson et al. 2021 *Radiocarbon dated trends and central Mediterranean prehistory***

- Alberti, G., 2013. Issues in the absolute chronology of the early–middle Bronze Age transition in Sicily and southern Italy: A Bayesian radiocarbon view. *Journal of Quaternary Science*, 28(6), 630–640.
- Albore Livadie, C., 2007. L'età del Bronzo antico e medio nella Campania nord-occidentale. In *Atti della XL riunione scientifica IIPP: Strategie di insediamento fra Lazio e Campania in età preistorica e protostorica* (Roma, Napoli, Pompei, 30 novembre – 3 dicembre 2005) (pp. 179–203). Florence: Istituto Italiano di Preistoria e Protostoria.
- Albore Livadie, C., Pearce, M., Delle Donne, M. and Pizzano, N., 2019. The effects of the Avellino pumice eruption on the population of the Early Bronze Age Campanian plain (southern Italy). *Quaternary International* 499, 205-220.
- Alciati, G., Cattani, L., Fontana, Gerhardinger, E., Guerreschi, A. and Rowley-Conwy, P., 1992. Mondeval de Sora: a high altitude Mesolithic campsite in the Italian Dolomites. *Preistoria Alpina*, 28(1), 351-366.
- Alessio, M., Bella, F., Bachechi, F. and Cortesi, C., 1965. University of Rome carbon-14 dates V. *Radiocarbon* 7, 213-222.
- Alessio, M., Bella, F., Bachechi, F. and Cortesi, C., 1967. University of Rome carbon-14 dates V. *Radiocarbon* 9, 346-367.
- Alessio, M and F.Bella, 1969. University of Rome Radiocarbon dates VII. *Radiocarbon* 11, 482-498.
- Alessio, M., Bella, F., Improta, S., Belluomini, G., Calderoni, G., Cortesi, C. and Turi, B., 1974. University of Rome carbon-14 dates XII. *Radiocarbon*, 16(03), 358-367.
- Alessio, M., Bella, F., Improta, S., Belluomini, G., Calderoni, G., Cortesi, C., Manelli, G.L. and Vigilante, A., 1975. University of Rome Carbon-14 Dates XIII. *Radiocarbon*, 17(03), 313-327.
- Alessio, M., Bella, F., Cortesi, C., 1976. University of Rome carbon-14 dates II. *Radiocarbon* 6, 77-90.
- Alessio, M., Allegri, L., Bella, F., Improta, S., Belluomini, G., Calderone, G., Cortesi, C., Manfra, L., Petrone, V. and Fruscalzo, A., 1978. University of Rome carbon-14 dates XV. *Radiocarbon*, 20(1), 68-78.
- Allegri, L., Cortesi, C. and Radmilli, A.M., 1987. La cronologia neolitica in base al radiocarbonio. *Atti della XXVI Riunione Scientifica* (pp.67-77). Florence: Istituto Italiano di Preistoria e Protostoria.
- Allentoft, S.M.E., Sjogren, M., K-G., Rasmussen, S., Stenderup, D.J., P., Schroeder, H., Ahlstrom, T., Vinner, L., Malaspinas, A.S., Margarin, A., Higham, T., Chivall, D., Lynnerup, N., Harvig, L., Baron, J., Casa, P., Dabrowski, P. et al., 2015. Population genomics of Bronze Age Eurasia. *Nature*, 522(7555), pp.167-172.
- Ambers, J., Matthews, K.J. and Bowman, S., 1989. British Museum natural radiocarbon measurements XXI. *Radiocarbon*, 31(1), pp.15-32.
- Angeli, L., 2018. Grotta del Leone (Agnano, PI). *Notiziario di Preistoria e Protostoria* 5(1), 7-9.
- Angelucci, D.E., 1997. Nuovi dati sulla preistoria delle dolomiti: La compagna di scavo 1994 nei siti mesolitici del plan de Frea (selva di Gardena). *Ladinia* 20, 9-37
- Anzidei, A.P. and Carboni, G., 2020. Roma prima del mito: Abitati e necropoli dal neolitico alla prima età dei metalli nel territorio di Roma (VI-III millennio a.C.) VOL. 2. Archaeopress: Oxford.
- Aprile, G., Ingravallo, E., and Tiberi, I., 2013. Recenti datazioni dalla necropoli di Salve (Lecce). In D. Cocchi Genick (ed.), *Cronologia assoluta e relativa dell'età del rame in Italia* (Atti dell'incontro di studi Università di Verona, 25 June 2013) (pp. 149–155). Verona: QuiEdit.
- Aranguren, B and Perazzi, P., 2011. L'insediamento di S. Lorenzo a Greve, Firenze : nuovi dati per una definizione degli aspetti culturali dell'Eneolitico nell'Italia centrale. In D. Cocchi Genick (ed.), *Atti della XLIII riunione scientifica IIPP – L'età del rame in Italia* (Bologna, 26–29 novembre 2008): Dedicata a Gianni Bailo Modesti (pp. 79–85). Florence: Istituto Italiano di Preistoria e Protostoria.
- Arena, F., Gualdi-Russo, E., Olsen, J., Philippsen, B. and Mannino, M., 2020. New data on agropastoral diets in southern Italy from the Neolithic to the Bronze Age. *Archaeological and Anthropological Sciences* 12(245).
- Aurino, P., Padovan, S. and Venturino Gambari, M., 2013. Riflessioni sull'età del Rame in Piemonte. In D. Cocchi Genick (ed.), *Cronologia assoluta e relativa dell'età del rame in Italia* (Atti

- dell'incontro di studi Università di Verona, 25 June 2013) (pp. 17–25). Verona: QuiEdit.
- Aurino, P., 2013. Al tempo del Gaudio: Riflessioni sull'età del rame in Campania. In D. Cocchi Genick (ed.), *Cronologia assoluta e relativa dell'età del rame in Italia* (Atti dell'incontro di studi Università di Verona, 25 June 2013) (pp. 157–171). Verona: QuiEdit.
- Azzi, C.M., Bigliocca, L. and Piovan, E., 1973. Florence Radiocarbon Dates I. *Radiocarbon*, 15, 479-487.
- Azzi, C.M., Bigliocca, L. and Piovan, E., 1974. Florence Radiocarbon Dates II. *Radiocarbon*, 16, 10-14.
- Azzi, C.M., Bigliocca, L. and Gulisano, F., 1977. Florence radiocarbon dates III. *Radiocarbon*, 19(2), pp.165-169.
- Babbi, A., Peltz, U. and Benelli, E., 2016. La tomba del guerriero di Tarquinia: identità elitaria, concentrazione del potere e networks dinamici nell'avanzato VIII sec. aC. *Verlag des Römisch-Germanischen Zentralmuseums*, 205-206.
- Bagolini, B., Barker, G., Castelletti, L. and Cremaschi, M., 1987. Scavi nell'insediamento neolitico di Campo Ceresole (Vhò di Piadena Cremona) : 1974-1979. In A. Parenti (ed.), *Atti della XXVI Riunione Scientifica, Il Neolitico in Italia*, Firenze 7-10 novembre 1985 (pp. 455-466), Florence: Istituto italiano di preistoria e protostoria.
- Bagolini, B. and Biagi, P., 1990. The radiocarbon Chronology of the Neolithic and Copper age of the Northern Italy. *Oxford Journal of Archaeology*, 9(1), 1-23.
- Bagolini, B., 1981. Il neolitico e l'età del rame: ricerca a Spilamberto e S. Cesario 1977-1980. Bologna: Comune di Spilamberto.
- Baioni, M., and Poggiani-Keller, R., 2008. I nuovi scavi a Monte Covolo (Brescia): breve sintesi sulle strutture abitative e sui materiali culturali dal Tardoneolitico all'età del Bronzo. In E. Mottes, F. Nicolis and G. Zontoni (eds.), *Archeologia lungo il Chiese. Nuove indagini e prospettive della ricerca preistorica e protostorica in un territorio condiviso fra Trentino e Lombardia* (pp. 37-68). Trento: Provincia autonoma di Trento.
- Baioni, M., and Poggiani-Keller, R., 2014. 3rd millennium BC ritual and burial practices in Lombardy. In M. Besse (ed.), *Around the Petit-Chasseur Site in Sion (Valais, Switzerland) and New Approaches to the Bell Beaker Culture : Proceedings of the International Conference (Sion, Switzerland - October 27th - 30th 2011)* (pp. 87-100). Oxford: Archaeopress.
- BANADORA (Banque Nationale de Données Radiocarbone pour l'Europe et le Proche Orient, Centre de Datation par le Radiocarbone) Available at: <http://www.arar.mom.fr/banadora/>
- Barbina, V., Calligaris, F., del Fabbro, A., Turello, A., 1984. Udine radiocarbon laboratory date list II. *Radiocarbon*, 26(2), 293-296.
- Barfield, L. H., 1983. The Chalcolithic cemetery at Manerba del Garda. *Antiquity*, 57(220), 116–124.
- Barfield, L. H., 1995. Scavi a Remedello sotto (1986): nota preliminare. *Museo e territorio: la bassa orientale*, 4(61–70), 23–42.
- Barfield, L. H., Manning, S. W., Valzogher, E., Higham, T. F. G., 2010. A wiggle-matched date for the Copper Age cemetery at Manerba Del Garda, Northern Italy. *Radiocarbon* 52, nr 2-3, 984-1001.
- Bernabò Brea M. and Maffi M., 2011. Una struttura del IV millennio aC a Le Mose (Piacenza). In D. Cocchi Genick (ed.), *Atti della XLIII riunione scientifica IIPP - L'età del rame in Italia* (Bologna, 26-29 novembre 2008): dedicata a Gianni Bailo Modesti (pp. 581-586). Florence: Istituto Italiano di Preistoria e Protostoria.
- Bernabò Brea, M. and Mazzeri, P., 2013. Nuovi dati sul campaniforme in Emilia. In R. De Marinis (ed.), *L'età del rame: la pianura padana e le alpi al tempo di Ötzi* (pp. 503-524). Brescia: Museo Diocesano.
- Bernabò Brea, M., Mazzeri, P. and Micheli, R., 2010. People, dogs and wild game: Evidence of human-animal relations from Middle Neolithic burials and personal ornaments in northern Italy. *Documenta Praehistorica*, 37, 125-145
- Bernabò Brea, M., Miari, M. and Steffè, G., 2017. Il Neolitico dell'emilia Romagna. In Bernabò Brea, M (ed.), *Preistoria e Protostoria dell'Emilia Romagna* (pp. 119-137). Firenze: IIPP.
- Bernardini, S., Coppa, A., Moggi-Cecchi, J., Conati Barbaro, C., Alhaique, F., Tagliacozzo, A., Goude, G. and Tafuri, M., 2021. Social dynamics and resource management strategies in Copper Age Italy: insights from archaeological and isotopic Data. *Environmental Archaeology*.

- Biagi, P. and Starnini, E. 2016. La cultura della ceramica impressa nella Liguria di Ponente (Italia settentrionale): distribuzione, cronologia e aspetti culturali. In J. J. Cabanilles (ed.), *Del neolitico a l'edat del bronze en mediterrani occidental: estudis en homentage a Bernat Martí Oliver* (pp. 35-49). València: TV SIP.
- Biagi, P., Starnini, E., Borič, D. and Mazzucco, N., 2020. Early Neolithic settlement of the Po Plain (northern Italy): Vhò and related sites. *Documenta Praehistorica*, 47, 192-221.
- Biagi, P., 2003. Alcuni problemi concernenti il popolamento preistorico della valle camonica', *Notizario del Centro Camuno di studi Preistorici*, 12-20
- Bianchin Citton, E. and Drusini, A., 2004. Datazione radiometrica col c14 della sepoltura. In E. Bianchin Citton (ed.), *L'area funeraria e culturale dell'età del Rame in Sovizzo nel contesto archeologico dell'Italia settentrionale*, Vicenza: Museo Naturalistico Archeologico, 41-42.
- Bianchin Citton, E., Balista, C., Fontana, A., Martinelli, N. and Mondini, C., 2015. Il sito del Col del Buson (Belluno) nella Valle dell'Ardo. In G. Leonardi and V. Tinè (eds.), *Preistoria e Protostoria del Veneto* (pp. 157-167). Firenze: Istituto Italiano di Preistoria e Protostoria.
- Bignon, O., Serrand, N., Jacques Costa, L., 2008. Les restes culinaires de Cuccuru is Arrius (Oristano, Sardaigne) : nouveaux apports à la connaissance des économies néolithiques en domaine littoral. *Bulletin de la Société préhistorique française*, 105(4) 773-785
- Binder, D., Lanos, P., Angeli, L., Gomart, L., Guilaine, J., Manen, C., Maggi, R., Muntoni, I., Panelli, C., Radi, G., Tozzi, C., Arobba, A., Battentier, J., Brandaglia, M., Bouby, L., Briois, F., Carré, A., Delhon, C., Gourichon, L., Marival, P., Nisbet, R., Rossi, S., Rowley-Conwy, P. and Thiebault, S., 2017. Modelling the earliest north-western dispersal of Mediterranean impressed wares: new dates and bayesian chronological model. *Documenta Praehistorica*, 44, 54–77.
- Bini, M., Rossi, V., Amorosi, A., Pappalardo, M., Sarti, G., Noti, V., Capitani, M., Fabiani, F. and Gualandi, M.L., 2015. Palaeoenvironments and palaeotopography of a multilayered city during the Etruscan and Roman periods: early interaction of fluvial processes and urban growth at Pisa (Tuscany, Italy). *Journal of Archaeological Science*, 59, pp.197-210.
- Borgna, E., Simeoni, G. and Vinci, G., 2019. Origin and evolution of a Bronze Age funerary landscape in Friuli: the “lower context” of the tumulus of Mereto di Tomba (Udine) and the 3rd-2nd millennium transition in northern Adriatic. *Origini* 43, 113-140.
- Brock, A.L. and Terrenato, N., 2016. Rome in the Bronze Age: late second-millennium BC radiocarbon dates from the Forum Boarium. *Antiquity*, 90(351), pp.654-664.
- Bronk Ramsey, C., Pettitt, P.B., Hedges, R.E.M., Hodgins, G.W.L. and Owen, D.C., 1999. Radiocarbon Dates from the Oxford AMS System: Archaeometry datelist 28. *Archaeometry* 41(2), 421-431.
- Bronk Ramsey, C., Higham, T.F.G., Owen, D.C., Pike, A.W.G. and Hedges, R.E.M., 2002. Radiocarbon Dates from the Oxford AMS System: Archaeometry datelist 31. *Archaeometry* 44, 1-150.
- Bronk Ramsey, C., Higham, T., Brock, F., Baker, D., Ditchfield, P., and Staff, R., 2015. Radiocarbon Dates from the Oxford AMS System: Archaeometry Datelist 35. *Archaeometry*, 57(1), 177-216.
- Buosi, C., Pittau, P., Paglietti, G., Scanu, G.G., Serra, M., Uccesu, M. and Tanda, G., 2015. A Human Occupation Cave During the Bronze Age: Archaeological and Palynological Applications of a Case Study in Sardinia (Western Mediterranean). *Archaeometry*, 57(S1), 212-231.
- Calabrisotto, C.S., Fedi, M.E., Taccetti, F., Benvenuti, M., Chiarantini, L. and Quaglia, L., 2009. Radiocarbon reveals the age of two precious tombs in the Etruscan site of Populonia-Baratti (Tuscany). *Radiocarbon* 51(3), p.915.
- Calcagnile, L., Tinè, V., Quarta, G., D'Elia, M., Fiorentino, G., Scarciglia, F., Robustelli, G., Abate, M., La Russa, M.F. and Pezzino, A., 2010. Chronostratigraphic sequence of Santuario Della Madonna Cave (Calabria, Southern Italy): AMS radiocarbon data from a new excavation area. *Radiocarbon*, 52(2), pp .408-414.
- CalPal (Cologne Radiocarbon CALibration and PALaeoclimate Package) designed by Bernhard Weninger and Olaf Jöris. Available at: <http://www.calpal.de/>
- Capuzzo, G., Boaretto, E. and Barceló, J. A., 2014. EUBAR: A Database of 14C Measurements for the European Bronze Age. A Bayesian Analysis of 14C-Dated Archaeological Contexts from Northern Italy and Southern France. *Radiocarbon*, 56(2), 851–869.

- Caracuta, V., Fiorentino, G. and Martinelli, M.C., 2012. Plant remains and AMS: Dating climate change in the Aeolian Islands (north-eastern Sicily) during the 2nd millennium BC. *Radiocarbon* 54 (3-4), 689-700.
- Carboni, G. and Anzidei, A. P., 2013). L'eneolitico recente e finale nel Lazio centro-meridionale: Una puntualizzazione sullo sviluppo e la durata di alcuni aspetti culturali sulla base delle più recenti datazioni radiometriche. In D. Cocchi Genick (ed.), *Cronologia assoluta e relativa dell'età del rame in Italia* (Atti dell'incontro di studi Università di Verona, 25 June 2013) (pp. 91–118). Verona: QuiEdit.
- Cattani, M., 2015. Gli scavi nel settore B dell'abitato dell'età del bronzo di Mursia (Pantelleria). *IpoTesi di Preistoria*, 7(1), pp.1-16.
- Cazzella, A. and Silivestrini, M., 2005. L'Eneolitico delle Marche nel contesto degli sviluppi culturali dell'Italia centrale. In *Atti della XXXVIII Riunione scientifica: preistoria e protostoria delle Marche* (pp. 371-396). Florence: Istituto Italiano di Preistoria e Protostoria.
- Cicilloni, R., Paglietti, G., Serra, M. and Uccesu, M., 2015. Lo scavo della capanna 16 nel villaggio del Bronzo Finale di Brunku 'e s'Omù - Villa Verde (Sardegna centro-occidentale). *Rivista di Scienze Preistoriche* (LXV), 117-148.
- Colombo, M., 2014. Colle Cera (Loreto Aprutino, Prov. Di Pescara). *Notiziario di Preistoria e Protostoria* 1(2), 50-52.
- Conati Barbaro, C., 2014. Portonovo. Fossa Fontanacci, *Notiziario di Preistoria e Protostoria*, 1(2) 27-28.
- Conati Barbaro, C., 2017. Portonovo. Fosso Fontanaccia (Anonca, AN), *Notiziario di Preistoria e Protostoria* 4(2), 36-38.
- Conati Barbaro, C., 2019. Il fuoco e la memoria: i forni neolitici di Portonovo. *Flornece: Museo e Istituto Fiorentino di Preistoria*.
- Conti, A.M., Persiani, C. and Petitti, P., 1997. I riti della morte nella necropoli eneolitica della Selvicciola (Ischia di Castro-Viterbo). *Origini* 21, pp.169-186.
- Cremaschi, M., Mercuri, A.M., Torri, P., Florenzano, A., Pizzi, C., Marchesini, M. and Zerboni, A., 2016. Climate change versus land management in the Po Plain (Northern Italy) during the Bronze Age: New insights from the VP/VG sequence of the Terramara Santa Rosa di Poviglio. *Quaternary Science Reviews*, 136, pp.153-172.
- Crispino, A., 2016. Castelluccio (Noto, Prov. di Siracusa). *Notiziario di Preistoria e Protostoria*, 3(2), 84-86
- Crispino, A. and Chilardi, A., 2018. Un pozzo dell'età del Bronzo da Piazza duomo di Siracusa. *Rivista di Scienze Preistoriche*, LXVIII, 359-384.
- Cruz-Berrocal, M., 2012. The Early Neolithic in the Iberian Peninsula and the Western Mediterranean: A Review of the Evidence on Migration. *Journal of World Prehistory* 25(4-3) 123-256.
- Dal Santo, N., Ferrari, A., Morico, G., and Steffè, G., 2014. Bell Beaker in Eastern Emilia (Northern Italy). In M. Besse (ed.), *Around the Petit-Chasseur site in Sion (Valais, Switzerland) and New Approaches to the Bell Beaker Culture* (pp. 205-236). Oxford: Archaeopress.
- Dalla Longa, E., Dal Corso, M., Vincenzutto, D., Micosia, C. and Cupitò, 2019. The Bronze Age settlement of Fondo Paviani (Italy) in its territory. Hydrography, settlement distribution, environment and in-site analysis. *Journal of Archaeological Science: Reports* 28.
- Dauchot, D.M. and Van, S.M., 1981. Institut Royal du Patrimoine Artistique radiocarbon dates XII. *Radiocarbon*, 29(2), pp.197-208.
- Dauchot, D.M. and Van, S.M., 1987. Institut Royal du Patrimoine Artistique radiocarbon dates XII. *Radiocarbon*, 29(2), pp.197-208.
- De Donno, A., Santoro, V., Di Fazio, A., Corrado, S., Urso, D., Baldassarra, S.L., Di Nunno, N. and Introna, F., 2010. Analysis of Neolithic human remains discovered in southern Italy. *Journal of Archaeological Science*, 37(3), pp.482-487.
- De Marinis, R., 1997. The eneolithic cemetery of Remedello Sotto (BS) and the relative and absolute chronology of the copper age in Northern Italy. *Notizie Archeologiche Bergomensi*, 5, 33–51.
- De Marinis, R., 1999. Towards a relative and absolute chronology of the Bronze Age in northern Italy. *Notizie Archeologiche Bergomensi*, 1(7), 23–100.

- De Marinis, R., 2001. Aspetti della metallurgia dell'antica età del Bronzo in Toscana. Atti della XXXIV Riunione Scientifica: Preistoria e Protostoria della Toscana (pp. 253-281). Firenze: Istituto Italiano di Preistoria e Protostoria.
- De Marinis, R.C., Rapi, M., Ravazzi, C., Arpentì, E., Deaddis, M. and Perego, R., 2005. Lavagnone (Desenzano del Garda): new excavations and palaeoecology of a Bronze Age pile dwelling site in northern Italy. In P. Della Casa and M. Trachsel (eds.), *Wetland Economies and Societies. Proceedings of the International Conference in Zurich, 10-13 March 2004* (pp. 221-232). Zurich: Chronos.
- De Marinis, R., 2013. La necropoli di Remedello Sotto e l'età del Rame nella pianura padana a nord del Po. In R. De Marinis (ed.), *L'età del rame: la pianura padana e le alpi al tempo di Ötzi* (pp. 301-352). Brescia: Museo Diocesano.
- Depalmas, A., 2012. La capanna 3 del villaggio nuragico di Iloi (Sedilo, OR). In Atti della XLIV Riunione scientifica: La preistoria e la protostoria della Sardegna (Vol. IV, Comunicazioni) (pp. 869-875.). Florence: Istituto Italiano di Preistoria e Protostoria.
- Dolfini, A. and Peroni, R., 2010. The origins of metallurgy in central Italy: New radiometric evidence. *Antiquity*, 84(325), 707–723.
- Eliana Poli, M., 2017. Indagini paleosismologiche a Palù di Livenza. In R. Micheli, R. (ed.), *Il Palù di Livenza e le palafitte del sito UNESCO: nuovi studi e ricerche* (pp. 95-100). Ecomuseo Lis Aganis: Udine.
- Elster, E.S., Isetti, E., Robb, J. and Traverso, A., 2016. *The Archaeology of Grotta Scaloria: Ritual in Neolithic Southeast Italy*. California: Cotsen Institute Press.
- Martini, F. and Tozzi, C., 1996. Il Mesolitico in Italia centro-meridionale. In S. K. Kozłowski and C. Tozzi (eds.), *The Mesolithic, XIII Intern. Congress of Prehistoric and Protohistoric Sciences* (pp 47-58). Forlì: A.B.A.C.O.
- Fabrizi, P. F., Viva, S., Ferrante, L., Lonoce, N., Tiberi, I., Cameriere, R., 2015. Radiological tooth/pulp ratio in canines and individual age estimation in a sample of adult Neolithic skeletons from Italy. *American Journal of Physical Anthropology*, 423-30.
- Fedi, M.E., Arnoldus-Huyzendveld, A., Cartocci, A., Manetti, M. and Taccetti, F., 2007. Radiocarbon dating in late-Roman and medieval contexts: an archaeological excavation in the Center of Florence, Italy. *Radiocarbon*, 49(2), 611-616.
- Fentress, E. and Bodel, J.P., 2003. *Cosa 5*. Ann Arbor: University of Michigan Press.
- Fentress, E., Judson, S., Blagg, T., de Vos, M. and Arthur, P., 1983. Excavations at Fosso Della Crescenza, 1962. *Papers of the British School at Rome* 51, 58-101
- Fentress, E., Goddson, C., Maiuro, M. Andrews, M. and Dufton, A. J., 2017. *Villa Magna: an Imperial Estate and its Legacies: Excavations 2006-10*. Rome: British School at Rome.
- Ferrara, G., Fornaca, R.G. and Tongiorgi, E., 1961. Carbon-14 dating in Pisa II. *Radiocarbon*, 3(1), 99-104.
- Ferrara, G., Reinharz, M. and Tongiorgi, E., 1959. Carbon-14 dating in Pisa. *Radiocarbon*, 1(1), 103-110.
- Ferrari, A., Pessina, A. and Steffè, G., 1998. The early Neolithic of central-eastern Emilia and of Romagna. *Preistoria Alpina* 34, 253-262.
- Filipović, D., Meadows, J., Corso, M.D. et al., 2020. New AMS 14C dates track the arrival and spread of broomcorn millet cultivation and agricultural change in prehistoric Europe. *Scientific Reports* 10, e13698.
- Fiorentino, G., Caldara, M., De Santis, V., D'Oronzo, C., Muntoni, I.M., Simone, O., Primavera, M. and Radina, F., 2013). Climate changes and human–environment interactions in the Apulia region of southeastern Italy during the Neolithic period. *The Holocene*, 23(9), 1297–1316.
- Forenbaier, S. and Miracle, P., 2005. The spread of farming in the Eastern Adriatic. *Antiquity* 79(305), 514-528.
- Forgia, V., Martín, P., López-García, J.M., Ollé, A., Vergès, J.M., Allué, E., Angelucci, D.E., Arnone, M., Blain, H.A., Burjachs, F. and Expósito, I., 2013. New data on Sicilian prehistoric and historic evolution in a mountain context, Vallone Inferno (Scillato, Italy), *Comptes Rendus Palevol* 12(2), 115-126.
- Franco, C., 2016. Excavations at the high altitude mesolithic site of Pian de La Lóra (Val Civetta-Venetian Dolomites) New data on the last hunter-gatherers of northern Italy. Excavations at the

- high altitude Mesolithic site of Pian de La Lóra (Val Civetta - Venetian Dolomites, Italy). *Preistoria Alpina* 48, 83-87.
- George, D., Bizzarri, C., Bianco, P., Trentacoste, A., Whitlam, J. and Best, J., 2017. Recent research in Cavità 254 (Orvieto, Italy). *Etruscan Studies*, 20(1).
- Giannitrapani, E., 2013. Cronologia assoluta della tarda età del Rame nella Sicilia centrale. In D. Cocchi Genick (ed.), *Cronologia assoluta e relativa dell'età del rame in Italia (Atti dell'incontro di studi Università di Verona, 25 June 2013)* (pp. 190-191). Verona: QuiEdit.
- Giannitrapani, E., 2014. The social significance of caves and rock-shelters in the prehistory of the Erei (Central Sicily): archaeological investigations at the Riparo 1 di Contrada San Tommaso near Enna. In G. Gulli (ed.), *From Cave to Dolmen Ritual and symbolic aspects in the prehistory between Sciacca, Sicily and the central Mediterranean (91-103)*. Oxford: Oxbow Books.
- Giannitrapani, E., Ianni, F., Chilardi, S. and Anguilano, L., 2014. Case Bastione: A prehistoric settlement in the Erei uplands (central Sicily). *Origini*, 35, 181–211.
- Giustetto, R., 2018. L'industrial in pietra verde dal sito del Neolitico antico padano di Novi Ligure, loc. Pieve (AL): Studio archeometrico ed analisi minero-petrografiche (Poster presented at 54th IIPP conference, Genova, October 2018)
- Goiran, J.P., Salomon, F., Tronchère, H., Djerbi, H., Carbonel, P., Ognard, C. and Oberlin, C., 2011. Géoarchéologie des ports de Claude et de Trajan, Portus, delta du Tibre. *Mélanges de l'École française de Rome-Antiquité* (123-1), 157-236.
- Goiran, J.P., Salomon, F., Bukowieki, E. and Boetto, G., 2011. Relations entre des carottages dans les bassins et sur les structures poruaires. *Chronique des activités archéologiques de l'École française de Rome*.
- Goiran, J.P., Salomon, F., Mazzini, I., Bravard, J.P., Pleuger, E., Vittori, C., Boetto, G., Christiansen, J., Arnaud, P., Pellegrino, A. and Pepe, C., 2014. Geoarchaeology confirms location of the ancient harbour basin of Ostia (Italy). *Journal of Archaeological Science*, 41, pp.389-398.
- Gowlett, J., Hedges, R. E. M., Law, I. A. and Perry, C., 1987. Radiocarbon dates from the Oxford AMS system: *Archaeometry datelist 5*, *Archaeometry* 29 (1), 125-155.
- Grifoni Cremonesi, R., 2001. Le Néolithique ancien de Toscane et de l'Archipel toscan. *Bulletin de la Société préhistorique française*, 98-3, pp.423-430.
- Gulli, D. and Terrasi, F., 2013. Nuovi dati di cronologia assoluta dell'età del rame: la necropoli di contrada Scintilia di Agrigento. In D. Cocchi Genick (ed.), *Cronologia assoluta e relativa dell'età del rame in Italia (Atti dell'incontro di studi Università di Verona, 25 June 2013)* (pp. 173-186). Verona: QuiEdit.
- Hadler, H., Vött, A., Fischer, P., Ludwig, S., Heinzelmann, M. and Rohn, C., 2015. Temple-complex post-dates tsunami deposits found in the ancient harbour basin of Ostia (Rome, Italy). *Journal of Archaeological Science*, 61, 78-89.
- Hedges, R.E.M., Housley, R.A, Law, I.A. and Bronk Ramsey, C., 1990. Radiocarbon Dates from the Oxford AMS System: *Archaeometry Datelist 10*. *Archaeometry* 32(1), 101-108.
- Hedges, R. E. M. Housley, R. A. Bronk, C. R. and Klinken, van G. J., 1991. Radiocarbon dates from the Oxford AMS system: *datelist 13*. *Archaeometry* 33(2), 279-296.
- Hedges, R.E.M., Housley, R.A, Bronk, C.R. and van Klinken, G.J., 1992. Radiocarbon Dates from the Oxford AMS System: *Archaeometry datelist 15*. *Archaeometry* 34 (2), 337-357.
- Hedges, R.E.M., Housley, R.A, Bronk Ramsey, C. and van Klinken, G.J., 1993. Radiocarbon dates from the Oxford AMS system: *Archaeometry datelist 17*. *Archaeometry* 35(2), 305-326.
- Hedges, R.E.M., Housley, R.A, Bronk Ramsey, C. and van Klinken, G.J., 1995. Radiocarbon dates from the Oxford AMS system: *Archaeometry datelist 19*. *Archaeometry* 37(1), 195-214.
- Hedges, R.E.M., Pettitt, P.B., Ramsey, C.B. and Klinken, G.J.V., 1996. Radiocarbon dates from the Oxford AMS system: *archaeometry datelist 22*. *Archaeometry*, 38, 391-415.
- Hedges, R.E.M., Pettitt, P.B., Bronk Ramsey, C. and van Klinken, G.J., 1998. Radiocarbon dates from the Oxford AMS system: *Archaeometry datelist 26*. *Archaeometry* 40(2), 437-455.
- Higham, T.F.G., Bronk Ramsey, C., Brock, F., Baker, D. and Ditchfield, P., 2007. Radiocarbon Dates from the Oxford AMS System: *Archaeometry Datelist 32*. *Archaeometry* 49, S1-S60.

- Huijzendveld, A. A., Turi, A., and Morelli, C., 2015. Il paleoambiente di Monte Giulio e della parte nord-orientale del bacino portuale di Claudio. *Fasti Online*. <http://www.fastionline.org/docs/FOLDER-it-2015-324.pdf>
- Ingravallo, E., 2002. Grotta Cappuccini (Galatone) tra eneolitico e primo bronzo. Galatina: Congedo.
- Improta, S. and Pessina, A., 1998. La neolitizzazione dell'Italia settentrionale. Il nuovo quadro cronologico. In A. Pessina and G. Muscio (eds.), *Settemila anni fa il primo pane : ambienti e culture delle società neolitiche* (pp.107-115). Comune di Udine, Museo friulano di storia naturale.
- Ippolito, F., 2016. Late Eneolithic and Early Bronze Age funerary evidence from the Sant'Angelo IV Cave (northeastern Calabria, Italy)', *Palaeohistoria* 57/58, 111-116.
- Morter, J., 2010. *The Chora of Croton 1: The Neolithic Settlement at Capo Alfiere*. Austin: University of Texas Press.
- La Marca, C., Eramo, G., Muntoni, I. M. and Conati Barbaro, C., 2017. Early Neolithic potters of the middle Adriatic region. *Archeologické rozhledy*, LXIX, 227-245.
- Lai, L., 2009. Il clima nella Sardegna preistorica e protostorica: problemi e nuove prospettive. In G. Vona (ed.), *Atti della XLIV riunione scientifica IIPP: la preistoria e la protostoria della Sardegna (Cagliari, Barumini, Sassari 23-28 novembre 2009)* (pp. 313–324). Florence: Istituto Italiano di Preistoria e Protostoria.
- Lawn, B., 1974. University of Pennsylvania radiocarbon dates XVII. *Radiocarbon*, 16(2), pp.219-237.
- Lo Vetro, D. and Martini, F., 2016. Mesolithic in central–southern Italy: overview of lithic productions. *Quaternary International* 423, 279–302.
- Lugliè, C., 2018. “Your path led trough the sea ...” The emergence of Neolithic in Sardinia and Corsica. *Quaternary International* 470, 285–300.
- Mussi, M., 1992. *Popoli e civiltà dell'Italia antica 10: Il Paleolitico e il Mesolitico in Italia*, Bologna: Stilus BSP.
- Pluciennik, M., 1997. Radiocarbon determinations and the Mesolithic-Neolithic transition in Southern Italy. *Journal of Mediterranean Archaeology* 10(2), 115–150.
- Magnani, G., Bartolomei, P., Venturino-Gambari, M., and Motella de Carlo, S., 1995. Le datazioni radiometriche. In M. Venturino-Gambari, *Navigatori e contadini: Alba e la valle del Tanaro nella preistoria*, Quaderni della Soprintendenza Archeologica del Piemonte 4.
- Maggi, R., Starnini, E. and Voyatek, B., 1997. *Arene Candide: a functional and environmental assessment of the Holocene sequence excavated by L. Bernabò Brea (1940-50) (Vol. 5)*. Roma: Calamo.
- Maggi, R. and Chiella, P., 1999. Chronologie par le radiocarbone du Néolithique des Arene Candide (Fouilles Bernabò Brèa). In J. Guilaine and D. Sacchi (eds.), *Les faciès leptolithiques du Nord-Ouest méditerranéen : milieux naturels et culturels : actes du Colloque international, XXIV Congrès préhistorique de France (Carcassonne, 26-30 septembre 1994)* (pp. 99-110). Paris: Société préhistorique française.
- Maggi, R. and Pearce, M., 2013). *Cronologia mineraria in Liguria*. In D. Cocchi Genick (ed.), *Cronologia assoluta e relativa dell'età del rame in Italia (Atti dell'incontro di studi Università di Verona, 25 June 2013)* (pp. 5-15). Verona: QuiEdit.
- Magnani, G., Bartolomei, P., Teresa, L., Marino, E.C. and Govon, G.C., 2006. ENEA radiocarbon measurements I. *Radiocarbon*, 48(1), pp.167-175.
- Manen, C., 2000. Le Néolithique ancien entre Rhône et Èbre : analyse des céramiques décorées. *Bulletin de la Société préhistorique française* (97-4), 666-668
- Manfredini A. and Muntoni I.M., 2003. Gli spazi del vivere: funzioni e cronologia delle strutture d'abitato dell'insediamento neolitico di Casale del Dolce (Anagni - FR). In *Atti della XXXV Riunione scientifica: Le comunità della preistoria italiana. Studi e ricerche sul neolitico e le età dei metalli* (pp. 187-198). Florence: Istituto Italiano di Preistoria e Protostoria.
- Manfredini, A., Lucia, S. and Silvestrini, M., 2005. Il neolitico delle Marche. In *Atti della XXXVIII Riunione Scientifica: Preistoria e Protostoria delle Marche* (pp. 197-208).
- Manfredini, A., 2012. La cronologia dell'Eneolitico del Tirreno centrale alla luce delle recenti datazioni radiometriche. In N. Negroni Catacchio (ed.), *Preistoria e Protostoria in Etruria. L'Etruria dal Paleolitico al Primo Ferro. Atti del Decimo Incontro di Studi* (pp. 275-281). Milano: Centro di Studi di Preistoria e Protostoria e Archeologia.

- Manfredini, A., Fugazzola Delpino, M. A., Sarti, L., Silvestrini, M. and Martini, F., 2009. Adriatico e Tirreno a confronto: analisi dell'occupazione territoriale tra il neolitico finale e l'età del rame in alcune aree campione dell'Italia centrale. *Rivista di Scienze Preistoriche*, 59, 115–179.
- Maniscalco, L., 2007. Considerazioni sull'età del Rame nella Media valle del Platani. *Rivista di Scienze Preistoriche* 57, 167-184.
- Mannino, M.A. and Thomas, K.D., 2007. New radiocarbon dates for hunter-gatherers and early farmers in Sicily. *Accordia Research Papers*, 10, pp.13-34.
- Martinelli, N., 2015. La palafitta di Aruqà Patraca: note sulla topografia, la tipologia e la cronologia assoluta delle strutture rinvenute sulle sponde del laghetto della Costa. In *Atti del Convegno di Studi di Archeologia e Territorio: "Dinamiche insediative nel territorio dei Colli Euganei dal Paleolitico al Medioevo"*. Padua: University of Padua.
- Martinelli, M. C., 2013. Cronologia assoluta della tarda età del rame nella Sicilia orientale tirrenica e Isole Eolie. In D. Cocchi Genick (ed.), *Cronologia assoluta e relativa dell'età del rame in Italia (Atti dell'incontro di studi Università di Verona, 25 June 2013)* (pp. 192-193). Verona: QuiEdit.
- Martínez Sánchez, M., Martín de la Cruz, J., Tusa, S., Jiménez, L. and Ingoglia, A., 2016. New contribution to absolute dating of the monumental neolithic ditch-trench of Stretto-Partanna (Trapani, Sicily). *Trabajos de Prehistoria*, 73, 315-324.
- Martínez-Grau, H., Jagher, R., Oms, F. X., Barceló, J. A., Pardo-Gordó, S. and Antolín, F., 2020. Global processes, regional dynamics? Radiocarbon data as a proxy for social dynamics at the end of the Mesolithic and during the early Neolithic in the NW of the Mediterranean and Switzerland (c. 6200–4600 cal. BC). *Documenta Praehistorica*, 47, 170-191.
- Mazzieri, P. and Giorgio, L., 2011. Una sequenza stratigrafica Sant'Ilario, località Taneto (Reggio Emilia). In D. Cocchi Genick (ed.), *Atti della XLIII riunione scientifica IIPP - L'età del rame in Italia (Bologna, 26-29 novembre 2008): dedicata a Gianni Bailo Modesti* (pp. 605-611). Florence: Istituto Italiano di Preistoria e Protostoria.
- Meadows, J., Martinelli, N., Nadeau, M., Bianchin Citton, E., 2014. Este, Padova: Dating the Iron Age waterfront. *Radiocarbon* 56(2), 655–665.
- Melis, R and Mussi, M., 2016. Mesolithic burials at S'Orku e S'Orku (SOMK) on the south-western coast of Sardinia. In J.M. Grünberg, B. Gramsch, L. Larsson, J. Orschiedt and H. Meller (eds.), *Mesolithic Burials – Rites, Symbols and Social Organisation of Early Postglacial Communities*. Landesamt für Denkmalpflege und Archäologie Sachsen-Anhalt.
- Melis, M. G., 2013. Problemi di cronologia insulare. La Sardegna tra il IV e il III millennio BC. In D. Cocchi Genick (ed.), *Cronologia assoluta e relativa dell'età del rame in Italia (Atti dell'incontro di studi Università di Verona, 25 June 2013)* (pp. 197–211). Verona: QuiEdit.
- Miari, M., 2011. Nuovi dati sull'eneolitico del territorio faentino. In D. Cocchi Genick (ed.), *Atti della XLIII riunione scientifica IIPP - L'età del rame in Italia (Bologna, 26-29 novembre 2008): dedicata a Gianni Bailo Modesti* (pp. 425-43). Florence: Istituto Italiano di Preistoria e Protostoria.
- Miari, M., 2014. La necropoli eneolitica di Celletta dei Passeri a Forlì. In R. C. De Marinis (ed.), *Atti di Convegno: Le manifestazioni del sacro e l'età del Rame nella regione alpina e nella pianura padana (Brescia, Palazzo Broletto, 23-24 maggio 2014)* (pp. 223–238). Bologna: Euroteam.
- Miari, M. and Benazzi, S., 2018. La necropoli di Gattolino di Cesena (Forlì-Cesena): Nuovi spunti di riflessione. In *Quinto Incontro Annuale di Preistoria e Protostoria: Materiali Preziosi, Semipreziosi e Inconsueti nell'Età del Rame e nell'Età del Bronzo Italiana*. Archeologia, Archeometria e Paleotecnologia (Università degli Studi di Padova, Padova, 29 Maggio 2018) (pp. 11–16). Florence: Istituto di Preistoria e Protostoria.
- Miari, M., Bazzocchi, M. and Milantoni, C., 2011. I materiali delle fasi più antiche del villaggio di Provezza (Cesena). In D. Cocchi Genick (ed.), *Atti della XLIII riunione scientifica IIPP - L'età del rame in Italia (Bologna, 26-29 novembre 2008): dedicata a Gianni Bailo Modesti* (pp. 645-650). Florence: Istituto Italiano di Preistoria e Protostoria.
- Micheli, R., Bassetti, M., Degasperis, N., Fozzati, L., Martinelli, N. and Rottoli, M., 2018a. Nuove ricerche al Palù di Livenza: lo scavo del Settore 3. In E. Borgna, P. Cassola Guida and S. Corazza (eds.), *Preistoria e Protostoria del Caput Adriae: Studi di Preistoria e Protostoria* 5 (pp. 481-490). Firenze: Istituto Italiano di Preistoria e Protostoria.



- Militello, P., Sammito, A.M., Buscemi, F., Figuera, M., Messina, T., Platana, E., Sferrazza, P. and Sirugo, S., 2018b. La capanna I di Calicantone: relazione preliminare sulle campagne di scavo 2012-2015. *Rivista di Scienze Preistoriche*, LXVIII, 255-304.
- Militello, P., Sammito, A. and Scerra, A., 2018. Calaforno. *Notiziario di Preistoria e Protostoria* 5(2), 90-93.
- Milliken, S., 1998. Hunter-gatherer land use in late glacial south-east Italy. *Oxford Journal of Archaeology* 17, 269-287.
- Moroni, A., Spagnolo, V., Crezzini, J., Boschin, F., Benvenuti, M., Gardin, S., Cipriani, S. and Arrighi, S., 2020. Settlement, space organization and land-use of a small Middle Bronze Age community of central Italy. The case study of Gorgo del Ciliegio (Arezzo-Tuscany). *Quaternary International* 539, 122-137
- Mottes, E., 2013. Il Neolitico dell'alto Garda: aspetti culturali e dinamiche insediative nel quadro della Preistoria del territorio sudalpino centro-orientale. In G. P. Brogiolo (ed.), *APSAT 3. Paesaggi storici del Sommolago* (pp. 89-115). Manatova: SAP Società Archeologica.
- Mottes, E., 2019. New evidence of settlement, burial and ritual aspects in the Neolithic and Copper Age in Trentino (northern Italy). In S. Hye and U. Töchterle (eds.), *UPIKU:TAUKE. Festschrift für Gerhard Tomedi zum 65. Geburtstag* (pp. 377-400). Bonn: Dr. Rudolf Habelt Verlag.
- Mottes, E. and Nicolis, F., 2019. Forme della ritualità funeraria tra Età del Rame e antica età del Bronzo nel territorio della Valle dell'Adige (Trentino Alto Adige, Italia settentrionale). Nota di aggiornamento. In F. Martini and L. Salzani (eds.), *Un lungo percorso di scienza. Scritti in onore di Leone Fasani* (pp. 191-219). Verona: Museo Civico di Storia Naturale di Verona.
- Mottes, E., Petrucci, G., Rottoli, M. and Visentini, P., 2009. Evolution of the Square Mouthed Pottery culture in the Trentino-Alto-Adige, Veneto, and Friuli: cultural, chronological, palaeoeconomic and environmental aspects. *Gortiana. Geologia, paleontologia paletnologia*, 31, 97-124.
- Müller, J., 1991. Die ostadriatische Impresso-Kultur: zeitliche Einordnung und kulturelle Einbindung. *Germania* 69. (2), 311-358.
- Müller, J., van Willigen, S. and Nicolis, F., 2001. New radiocarbon evidence for European Bell Beakers and the consequences for the diffusion of the Bell Beaker phenomenon. In F. Nicolis (ed.), *Bell Beakers today: pottery, people, culture, symbols in prehistoric Europe*, 1 (pp.59-80). Trento: Provincia Autonoma di Trento.
- Natali, E. and Forgia, V., 2018. The beginning of the Neolithic in Southern Italy and Sicily. *Quaternary International*, 470, 253-269.
- Negrone Catacchio, N., Pacciani, E., Albertini, E., Aspesi, M. and Moggi-Cecchi, J., 2014. Nuovi dati su alcune necropoli Rinaldoniane: revisione di vecchi scavi, nuove datazioni e recenti analisi dei resti scheletrici. *Rivista di Scienze Preistoriche*, 64, 83-113.
- Nicolis, F., 2001. Il culto dei morti nell'antica e media età del Bronzo. In M. Lanzinger, F. Marazatico and A. Pedrotti (eds.), *Storia del Trentino* (pp. 337-365). Bologna: Il Mulino.
- Nicolis, F., Mottes, E., Degasperis, N. and Conci, C., 2007. Il riparo sottoroccia di Ala le Corone (Trento) in Valle dell'Adige. Considerazioni preliminari sulla sequenza stratigrafica e culturale. *Quaderni Culturali Caprinesi*, 2, 80-96.
- Nijboer, A.J., Van Der Plicht, J., Betti Sestieri, A.M. and De Santis, A., 2000. A high chronology for the early Iron Age in central Italy. *Palaeohistoria* 41/42, 163-176.
- Olsson, I.U. and Kilicci, S., 1964. Uppsala natural radiocarbon measurements IV. *Radiocarbon*, 6(1), pp.291-307.
- Pacciarelli, M., 2011. L'Eneolitico della Calabria Tirrenica: Nuovi dati sull' articolazione cronoculturale. *Origini: Preistoria e protostoria delle civiltà antiche*, (33), pp.249-288.
- Panelli, C., Sparacello, V., Conventi, M., de Santis, H., Rossi, S., Starnini, E. and Tozzi, C., 2018a. La Grotta Mandurea a Borgio Verezzi (SV) tra ricerca e tutela. (Poster presented at 54th IIPP conference, Genova, October 2018).
- Panelli, C., Starnini, E., Nisbet, R. and Ottomano, C., 2018b. Villanova d'Albenga (SV), Loc. Coasco: Un insediamento neolitico all'aperto nell'entroterra ingauno (Poster presented at 54th IIPP conference, Genova, October 2018).
- Parkinson, E. and McLaughlin, T. R., 2020. Lifeways at the acme of the south Italian Neolithic: new chronological and bio-archaeological data from Fonteviva, Apulia. *Journal of Archaeological Science: Reports* 34A.

- Passariello, I., Talamo, P., D'Onofrio, A., Barta, P., Lubritto, C. and Terrasi, F., 2010. Contribution of radiocarbon dating to the chronology of Eneolithic in Campania (Italy). *Geochronometria*, 35(1), pp.25-33.
- Pearce, M., 2013. Rethinking the north Italian early Neolithic. London: Accordia Institute.
- Pétrequin, P., Errera, M., Pétrequin, A.M. and Allard, P., 2006. The Neolithic quarries of Mont Viso, Piedmont, Italy: initial radiocarbon dates. *European Journal of Archaeology*, 9(1), pp.7-30.
- Pinhasi, R., Fort, J. and Ammerman, A.J., 2005. Tracing the origin and spread of agriculture in Europe. *PLoS Biology*, 3(12), e410.
- Pische, A., 2016. Le tombe di giganti di Is Lapededas (Gonnosnò-OR). Archeologia della morte di una comunità nuragica. Unpublished PhD thesis, University of Barcelona.
- Poggiani Keller, R., Binaghi Leva, M.A., Menotti, E. A., Roffia, E. A., Pacchieni, T., Baioni, M., Martinelli, N., Ruggiero, M. G. and Bocchi, G., 2005. Siti d'ambiente umido della Lombardia: rilettura di vecchi dati e nuove ricerche. In P. Della Casa and M. Trachsel (eds.), *Wetland Economies and Societies. Proceedings of the International Conference in Zurich, 10-13 March 2004* (pp. 233–250). Zurich: Chronos.
- Quarta, G., D'Elia, M., Ingravallo, E., Tiberi, I. and Calcagnile, L., 2005. The Neolithic site of Serra Cicora: Results of the AMS radiocarbon dating. *Radiocarbon* 47(2), 207-210.
- Quarta, G., Larocca, F., D'Elia, M., Gaballo, V., Macchia, M., Palestra, G. and Calcagnile, L., 2013. Radiocarbon dating the exploitation phases of the Grotta Della Monaca cave in Calabria, southern Italy: A prehistoric mine for the extraction of Iron and Copper. *Radiocarbon* 55, 1246–1251
- Quarta, G., Tiberi, I., Rossi, M., Aprile, G., Braione, E., D'Elia, M., Ingravallo, E., and Calcagnile, L., 2014. The Copper Age Necropolis in Salve, Lecce, Italy: Radiocarbon dating results on charcoals, bones, cremated bones and pottery. *Radiocarbon* 56, 949-957
- Ravazzi, C., 2000. Studio Pollini co di un focolare neolitico a casale (pre-alpi Lombarde, Bergamo). *Tafonomia e interpretazione palaeoambientale. Natura Bresciana* 32, 23-33.
- Ringbom, A., Hale, J., Heinemeier, J., Lindroos, A., Brock, F. and Dunkeld, M., 2006. The use of mortar dating in archaeological studies of Classical and Medieval structures. In *Proceedings of the Second International Congress on Construction History (Volume 3, pp. 2613-33)*. Exeter: Short Run Press.
- Rolfo, M.F., Achino, K.F., Fusco, I., Salari, L. and Silvestri, L., 2016. Reassessing human occupation patterns in the inner central Apennines in prehistory: The case-study of Grotta Mora Cavorso. *Journal of Archaeological Science: Reports*, 7, pp.358-367.
- Rutgers, L.V., Borg, K.V.D., Jong, A.F.D., Linde, C.V.D. and Prins, J., 2007. Further radiocarbon dates from the catacombs of St. Callixtus in Rome. *Radiocarbon*, 49(3), pp.1221-1230.
- Sadori, L., Mercuri, A.M. and Mariotti Lippi, M., 2010a. Reconstructing past cultural landscape and human impact using pollen and plant macroremains. *Plant Biosystems*, 144(4), pp.940-951.
- Sadori, L., Giardini, M., Giraudi, C. and Mazzini, I., 2010b. The plant landscape of the imperial harbour of Rome. *Journal of Archaeological Science*, 37(12), 2394-3305.
- Salomon, F., Delile, H., Goiran, J.P., Bravard, J.P. and Keay, S., 2012. The Canale di Comunicazione Traverso in Portus: the Roman sea harbour under river influence (Tiber delta, Italy). *Géomorphologie: Relief, processus, environnement*, 18(1), pp.75-90.
- Salzani, P., 2002. Verona-Loc. Bongiovanna, Insediamento della fine dell'età del Rame. In A. Aspes (ed.), *Preistoria veronese. Contributi e aggiornamenti* (pp. 96-97). Verona: Museo Civico di Storia Naturale di Verona.
- Schiappelli, A., 2008. Sviluppo Storico della Tiberina nell'Eta' del Bronzo e nella prima eta' del Ferro. Firenze: All'Insegna del Giglio, 210.
- Serradimigni, M. and Colombo, M., 2014. L'analisi tecno-tipologica dei nuclei in selce come indicatore di cambiamento culturale. L'esempio del villaggio neolitico di Catignano – Area D (Pescara). *Società Toscana di Scienze Naturali (Serie A)*, 121, 99-107.
- Silvestri, L., Achino, K. F., Gatta, M., Rolfi, M. and Salari, L., 2020. Grotta Mora Cavorso: Physical, material and symbolic boundaries of life and death practices in a Neolithic cave of central Italy. *Quaternary International* 539, 29-38.
- Silvestri, E., Bellintani, P., Nicolis, F., Bassetti, M., Biagioni, S., Cappellozza, N., Degasperi, N., Marchesini, N., Martinelli, N., Marvelli, N. and Pignatelli, O., 2015. New excavations at smelting sites in Trentino, Italy: archaeological and archaeobotanical data. In A. Hauptmann and D.

- Modarressi-Tehrani (eds.), *Archaeometallurgy in Europe III (Proceedings of the 3rd International Conference Deutsches Bergbau-Museum Bochum)* (pp. 369-376). Bochum: Museum Bochum.
- Skeates, R., 1994. A radiocarbon date-list for prehistoric Italy (c.46,400 BP-2450 BP/400 cal.BC). In R. Skeates and R. D. Whitehouse (eds.), *Radiocarbon Dating and Italian prehistory* (pp. 147-388). Rome: British School at Rome.
- Skeates, R., 1996. Towards an absolute chronology for the Copper Age in central Italy: A Note based on the conelle site and culture. *Papers of the British School at Rome*, 64, 273–282.
- Skeates, R., 2000. New radiocarbon dates for prehistoric Italy and Malta: supplementary list 4. *Accordia Research Papers*, 8, 165–186.
- Skeates, R., 2003. New radiocarbon dates for prehistoric Italy: supplementary list 5. *Accordia Research Papers*, 5, 163–81.
- Skeates, R., 2013. Neolithic Italy at 4004 BC: people and places. *Accordia Research Papers: Rethinking the Italian Neolithic*, 13, 1–29.
- Skeates, R., 2014. Communicating over space and time in the world of the Iceman. In S. Souvatzi and A. Hadji (eds.), *Space and time in Mediterranean prehistory* (pp. 138-159). New York: Routledge.
- Skeates, R. and Whitehouse, R. D., 1994a. New radiocarbon dates for prehistoric Italy 1. *Accordia Research Papers*, 5, 137–150.
- Skeates, R. and Whitehouse, R. D., 1996. New radiocarbon dates for prehistoric Italy 2., *Accordia Research Papers*, 6, 179–191.
- Skeates, R. and Whitehouse, R. D., 1998. New radiocarbon dates for prehistoric Italy 3, *Accordia Research Papers*, 7, 149-162.
- Skeates, R., Gradoli, M. G. and Beckett, J., 2013. The cultural life of caves in Seulo, central Sardinia. *Journal of Mediterranean Archaeology* 26(1), 97-126.
- Soula, F., 2012. *Les pierres dressées de l'aire corso-sarde. Etude systémique des territoires (Vol. 2)*. Unpublished PhD thesis submitted to Università degli Studi di Sassari.
- Scoz L., Cavulli, F., Fedrigotti, A., Neri, S., Pedrotti, A. and Dalmeri, G., 2015. New data on the first human settlements in western Trentino: The site of Pozza Lavino in the Ledro valley (Trentino, Italy). *Quaternary International*, 423, 40-57.
- Sparacello, V., Varalli, A., Rossi, S., Panelli, C., Goude, G., Palstra, S. et al., 2019. Dating the funerary use of caves in Liguria (northwestern Italy) from the Neolithic to historic times: results from a large-scale AMS campaign on human skeletal series. *Quaternary International*, 536, pp 30-44.
- Starnini, E., Biagi, P. and Mazzucco, N., 2018. The beginning of the Neolithic in the Po Plain (northern Italy): Problems and perspectives. *Quaternary International*, 470, 270–284.
- Steffè, G., Bernabò Brea, M. and Miari, M., 2017. *L'eneolitico dell'Emilia Romagna*. In M. Bernabò Brea (ed.), *Preistoria e protostoria dell'Emilia Romagna (vol. II, età del Bronzo, età del Ferro)* (pp. 139-157). Florence: Istituto Italiano di Preistoria e Protostoria.
- Talamo, P., Passariello, I., Lubritto, C. and Terrasi, F., 2011. *Evoluzione culturale in Campania: indagine cronologica sistematica tramite datazioni radiocarboniche*. In D. Cocchi Genick (ed.), *Atti della XLIII riunione scientifica IIPP - L'età del rame in Italia (Bologna, 26-29 novembre 2008): dedicata a Gianni Bailo Modesti* (pp. 39-48). Florence: Istituto Italiano di Preistoria e Protostoria.
- Tanda, G., Mule, P. and Zedda, M., 2012. *Le strutture 6 e 7 del billagioa nuragico di Iloi (sedilo)*. In *Atti della XLIV Riunione Scientifica: La preistoria e la protostoria della Sardegna (Cagliari, Barumini, Sassari, 23-28 novembre 2009) Volume I : Relazioni generali* (pp. 877-884). Firenze: Istituto italiano di preistoria e protostoria.
- Tecchiati, U., 2013. *Luoghi di culto, sepolture e sepolcretidell'età del Rame dell'area atesina*. In R. De Marinis (ed.), *L'età del rame: la pianura padana e le alpi al tempo di Ötzi* (pp/ 480-457). Brescia: Museo Diocesano.
- Tiné, V., 2015. *Il neolitico in Veneto*. In G. Leonardi, G. and V. Tinè (eds.), *Preistoria e Protostoria del Veneto* (pp. 79-84). Firenze: Istituto Italiano di Preistoria e Protostoria.
- Tiné, V. and Tusa, S., 2012. *Il neolitico in Sicilia*. In *Atti della XLI Riunione Scientifica: dai ciclopi agli escisti società e territorio nella Sicilia preistorica e protostoria (San Cipirello PA, 16-19 novembre 2006)* (pp. 49-80), Firenze: Istituto Italiano di Preistoria e Protostoria.

- Tiné, V., Natali, E., Sciola, L., Dal Santo, N. and Fuolega, F., 2015. Il sito del Neolitico recente e finale di Castelnuovo di Teolo (padova). Nouvi dati. In G. Leonardi and V. Tinè (eds.), *Preistoria e Protostoria del Veneto* (pp. 129-137), Firenze: Istituto Italiano di Preistoria e Protostoria.
- Tozzi, C., 1998. Culture de Catignano-Scaloria Bassa. In J. Guilaine (ed.), *Atlas du Neolitique europeen Vol 2a* (pp. 178-180). Liège: Université de Liège
- Tozzi, C. and Weiss, M., 2007. *Préhistoire et protohistoire de l'aire tyrrhénienne = Preistoria e protostoria dell'area tirrenica*. Pisa: Ghezzano.
- Trautman, M.A. and Willis, E.H., 1966. Isotopes, Inc. Radiocarbon Measurements V. *Radiocarbon*, 8, 161-203.
- Tunzi, A. M., Matteo Martino, F., Gasperi, N., Bubba, D. and de Armentia, M., 2013. L'insediamento dell'eta del Rame di Tegole (Bovino, Foggia). In D. Cocchi Genick (ed.), *Cronologia assoluta e relativa dell'età del rame in Italia (Atti dell'incontro di studi Università di Verona, 25 June 2013)* (p. 137-148). Verona: QuiEdit.
- Tusa, S., 1990. *La preistoria nel territorio di Trapani*. Ediprint: Siracusa.
- Tusa, S., 2013. Cronologia assoluta della tarda eta del rame nella Sicilia occidentale: la grotta del Cavallo del Monte Inici. In D. Cocchi Genick (ed.), *Cronologia assoluta e relativa dell'età del rame in Italia (Atti dell'incontro di studi Università di Verona, 25 June 2013)* (p. 188). Verona: QuiEdit.
- Tykot, R. H., 1994. Radiocarbon Dating and Absolute Chronology in Sardinia and Corsica. In R. Skeates and R. D. Whitehouse (eds.), *Radiocarbon Dating and Italian prehistory* (pp. 115-145). Rome: British School at Rome.
- Ucchesu, M., Sau, S. and Lugliè, C., 2017. Crop and wild plant exploitation in Italy during the Neolithic period: new data from Su Mulinu Mannu, Middle Neolithic site of Sardinia. *Journal of Archaeological Science: Reports*, 14, 1–11.
- Usai, A., 2015. Monte Prama 2015: Nota preliminare. *Quaderni*, 26, 75-111
- Usai, A. and Vidili, S., 2016. Gli edifici A-B di mont'e prama (Scavo 2015). *Quaderni*, 27, 75-86
- Valzolgher, E. and Quarta, G., 2009. Date radiocarboniche AMS dal Riparo di Peri (Dolcé, Verona). *Commento e analisi bayesiana. Bollettino del Museo Civico di Storia Naturale di Verona* 33, 85-113.
- Valzolgher, E., Meadows, J., Salzani, P. and Salzani, L., 2012. Radiocarbon dating of the early Bronze Age cemetery at Arano, Verona, Northern Italy. *Radiocarbon* 54 (3-4), 483-503.
- Vander Linden, M., 2006. *Le phénomène campaniforme dans l'Europe du 3ème millénaire avant notre ère: Synthèse et nouvelles perspectives*. Oxford: British Archaeological Reports.
- van der Plicht, J., Bruins, H.J. and Nijboer, A.J., 2009. The Iron Age around the Mediterranean: a high chronology perspective from the Groningen radiocarbon database. *Radiocarbon*, 51(1), 213-242.
- Van Dommelen, P., Cusi, E. D., Gosner, L., Hayne, J., Pérez-Jordà, G., Ramis, D., Roppa, A and Stiglitz, A., 2019. Un millennio di storie: nuove notizie preliminari sul progetto S'Urachi (San Vero Milis, OR), 2016-2018. *Quaderni*, 29, 141-167.
- Van Rossenberg, E., 2012. *Cultural landscapes, social networks and historical trajectories: A data-rich synthesis of Early Bronze Age networks (c. 2200-1700 BC) in Abruzzo and Lazio (central Italy)*. Unpublished PhD Thesis, University of Leiden.
- Vanzetti, A., 2013. '1600? The rise of the Terramara system (Northern Italy). In 1600 - Cultural Change in the Shadow of the Thera Eruption? (4th Archaeological Conference of central Germany, October 14-16, 2011, Halle) (pp. 267–282). Saale: Landesmuseums.
- Venturino-Gambari, M., and Motella de Carlo, S., 1995. Le datazioni radiometriche. In M. Venturino-Gambari (ed.), *Navigatori e contadini: Alba e la valle del Tanaro nella preistoria*. Quaderni della Soprintendenza Archeologica del Piemonte 4.
- Venturino, M. and Ferreo, L., 2008. Sepolture a inumazione dell'età del Bronzo nel Piemonte meridionale. *Quaderni di Archeologia del Piemonte* 2, 11-43.
- Visentini, P., 2006. Aspetti cronologici e culturali della fine del Neolitico nell'Italia nord-orientale. In A. Pessina and P. Visentini (eds.), *Preistoria dell'«Italia settentrionale*. Studi in ricordo di Bernardino Bagolini *Atti del Convegno* (pp. 225-242). Udine.
- Whitehouse, R. D., 2013. The chronology of the Neolithic ditched settlements of the Tavoliere and the Ofanto valley. *Accordia Research Papers: Rethinking the Italian Neolithic*, 13, 57–78.

- Wicks, D., Armirotti, A. and De Davide, C., 2018. Aosta in epoca preistorica e protostorica alla luce delle recenti indagini archeologiche', *Rivista di Scienze Preistoriche*, LXVII, 109-140.
- Zoppi, U., Fulcheri, E., Gambari, F. M., Hua, Q., Lawson, E. N., Micheletti, C. M and Venturino, G. M., 2001. The Copper Age in northern Italy. *Radiocarbon*, 43(2), 1049–1055.
